# Supplementary material
Source: PubMed Central journal article supplement (PMC7596865)
Supplement: oc0c00680_si_001.pdf [file oc0c00680_si_001.pdf]

# Synthetic Elaboration of Native DNA by RASS (SENDR)

Dillon T. Flood,<sup>1,†</sup> Kyle W. Knouse,<sup>1,†</sup> Julien C. Vantourout,<sup>1</sup> Seiya Kitamura,<sup>1</sup> Brittany B. Sanchez,<sup>§</sup> Emily J. Sturgell,<sup>§</sup> Jason S. Chen,<sup>§</sup> Dennis W. Wolan,<sup>1</sup> Phil S. Baran,<sup>1\*</sup> Philip E. Dawson.<sup>1\*</sup>

<sup>1</sup>Department of Chemistry, Scripps Research, 10550 North Torrey Pines Road, La Jolla, California 92037, United States

<sup>§</sup>Automated Synthesis Facility, Scripps Research, 10550 North Torrey Pines Road, La Jolla, CA 92037, United States

<sup>†</sup>These authors contributed equally to this work.

## Table of Contents

|                                                                           |           |
|---------------------------------------------------------------------------|-----------|
| <b>General Experimental</b> .....                                         | <b>7</b>  |
| <b>DNA starting materials</b> .....                                       | <b>9</b>  |
| <b>Synthesis and Characterization of <math>\Psi</math>-modules</b> .....  | <b>19</b> |
| <b>General Procedure 1 - Synthesis of <math>\Psi</math>-modules</b> ..... | <b>19</b> |
| Source of Alcohols used in Synthesis of $\Psi$ -modules .....             | 20        |
| Synthesis of $\Psi$ -1 through $\Psi$ -20 .....                           | 21        |
| <b>NMR Spectra</b> .....                                                  | <b>42</b> |
| Compound $\Psi$ -1 <sup>1</sup> H NMR.....                                | 42        |
| Compound $\Psi$ -1 <sup>13</sup> C NMR.....                               | 42        |
| Compound $\Psi$ -1 <sup>31</sup> P NMR.....                               | 43        |
| Compound $\Psi$ -2 <sup>1</sup> H NMR.....                                | 43        |
| Compound $\Psi$ -2 <sup>13</sup> C NMR.....                               | 44        |
| Compound $\Psi$ -2 <sup>31</sup> P NMR.....                               | 44        |
| Compound $\Psi$ -3 <sup>1</sup> H NMR.....                                | 45        |
| Compound $\Psi$ -3 <sup>13</sup> C NMR.....                               | 45        |
| Compound $\Psi$ -3 <sup>31</sup> P NMR.....                               | 46        |
| Compound $\Psi$ -5 <sup>1</sup> H NMR.....                                | 46        |
| Compound $\Psi$ -5 <sup>31</sup> P NMR.....                               | 47        |
| Compound $\Psi$ -5 <sup>13</sup> C NMR.....                               | 47        |
| Compound $\Psi$ -6 <sup>1</sup> H NMR.....                                | 48        |
| Compound $\Psi$ -6 <sup>13</sup> C NMR.....                               | 48        |
| Compound $\Psi$ -6 <sup>19</sup> F NMR .....                              | 49        |
| Compound $\Psi$ -6 <sup>31</sup> P NMR.....                               | 49        |
| Compound $\Psi$ -7 <sup>1</sup> H NMR.....                                | 50        |
| Compound $\Psi$ -7 <sup>13</sup> C NMR.....                               | 50        |
| Compound $\Psi$ -7 <sup>31</sup> P NMR.....                               | 51        |
| Compound $\Psi$ -8 <sup>1</sup> H NMR.....                                | 51        |
| Compound $\Psi$ -8 <sup>13</sup> C NMR.....                               | 52        |
| Compound $\Psi$ -8 <sup>31</sup> P NMR.....                               | 52        |
| Compound $\Psi$ -9 <sup>1</sup> H NMR.....                                | 53        |
| Compound $\Psi$ -9 <sup>13</sup> C NMR.....                               | 53        |
| Compound $\Psi$ -9 <sup>31</sup> P NMR.....                               | 54        |

|                                                                            |           |
|----------------------------------------------------------------------------|-----------|
| Compound $\Psi$ -9 $^1\text{H}$ NMR.....                                   | 54        |
| Compound $\Psi$ -10 $^{13}\text{C}$ NMR.....                               | 55        |
| Compound $\Psi$ -10 $^{31}\text{P}$ NMR.....                               | 55        |
| Compound $\Psi$ -11 $^1\text{H}$ NMR.....                                  | 56        |
| Compound $\Psi$ -11 $^{13}\text{C}$ NMR.....                               | 56        |
| Compound $\Psi$ -11 $^{31}\text{P}$ NMR.....                               | 57        |
| Compound $\Psi$ -12 $^1\text{H}$ NMR.....                                  | 57        |
| Compound $\Psi$ -12 $^{13}\text{C}$ NMR.....                               | 58        |
| Compound $\Psi$ -12 $^{31}\text{P}$ NMR.....                               | 58        |
| Compound $\Psi$ -13 $^1\text{H}$ NMR.....                                  | 59        |
| Compound $\Psi$ -13 $^{13}\text{C}$ NMR.....                               | 59        |
| Compound $\Psi$ -13 $^{19}\text{F}$ NMR.....                               | 60        |
| Compound $\Psi$ -13 $^{31}\text{P}$ NMR.....                               | 60        |
| Compound $\Psi$ -(Rp)-14 $^1\text{H}$ NMR.....                             | 61        |
| Compound $\Psi$ -(Rp)-14 $^{13}\text{C}$ NMR.....                          | 61        |
| Compound $\Psi$ -(Rp)-14 $^{31}\text{P}$ NMR.....                          | 62        |
| Compound $\Psi$ -15 $^1\text{H}$ NMR.....                                  | 62        |
| Compound $\Psi$ -15 $^{13}\text{C}$ NMR.....                               | 63        |
| Compound $\Psi$ -15 $^{31}\text{P}$ NMR.....                               | 63        |
| Compound $\Psi$ -16 $^1\text{H}$ NMR.....                                  | 64        |
| Compound $\Psi$ -16 $^{13}\text{C}$ NMR.....                               | 64        |
| Compound $\Psi$ -16 $^{31}\text{P}$ NMR.....                               | 65        |
| Compound $\Psi$ -17 $^1\text{H}$ NMR.....                                  | 65        |
| Compound $\Psi$ -17 $^{13}\text{C}$ NMR.....                               | 66        |
| Compound $\Psi$ -17 $^{31}\text{P}$ NMR.....                               | 66        |
| Compound $\Psi$ -18 $^1\text{H}$ NMR.....                                  | 67        |
| Compound $\Psi$ -18 $^{13}\text{C}$ NMR.....                               | 67        |
| Compound $\Psi$ -18 $^{31}\text{P}$ NMR.....                               | 68        |
| Compound $\Psi$ -19 $^1\text{H}$ NMR.....                                  | 68        |
| Compound $\Psi$ -19 $^{13}\text{C}$ NMR.....                               | 69        |
| Compound $\Psi$ -19 $^{31}\text{P}$ NMR.....                               | 69        |
| <b><i>SENDR Protocol</i></b> .....                                         | <b>70</b> |
| <b>General Procedure 2: SENDR in Microcentrifuge Tubes</b> .....           | <b>70</b> |
| Troubleshooting and Frequently Asked Questions.....                        | 72        |
| <b>General Procedure 3: SENDR in Fritted Cartridges (Kit Format)</b> ..... | <b>73</b> |
| Resin Preparation.....                                                     | 73        |
| Troubleshooting and Frequently Asked Questions.....                        | 76        |
| <b>General Procedure 4: <i>In Situ</i> Module Formation</b> .....          | <b>77</b> |
| <b><i>Optimization of SENDR protocol and conditions</i></b> .....          | <b>78</b> |
| <b>Optimization Procedure</b> .....                                        | <b>78</b> |
| <b>Characterization of SENDR Optimization</b> .....                        | <b>79</b> |
| LCMS Characterization of 3.....                                            | 79        |
| LCMS Characterization of 4.....                                            | 82        |
| <b>Process for Mass Fragmentation of 3</b> .....                           | <b>85</b> |
| <b>Analysis of Optimization Reactions</b> .....                            | <b>87</b> |
| Entry 1: 5' .....                                                          | 87        |

|                                                                 |            |
|-----------------------------------------------------------------|------------|
| Entry 1: 3'                                                     | 90         |
| Entry 2: 5'                                                     | 93         |
| Entry 2: 3'                                                     | 96         |
| Entry 3: 5'                                                     | 99         |
| Entry 3: 3'                                                     | 102        |
| Entry 4: 5'                                                     | 105        |
| Entry 4: 3'                                                     | 108        |
| Entry 5: 5'                                                     | 111        |
| Entry 5: 3'                                                     | 114        |
| Entry 6: 5'                                                     | 117        |
| Entry 6: 3'                                                     | 120        |
| Entry 7: 5'                                                     | 123        |
| Entry 7: 3'                                                     | 126        |
| Entry 8: 5'                                                     | 129        |
| Entry 8: 3'                                                     | 132        |
| Entry 9: 5'                                                     | 135        |
| Entry 9: 3'                                                     | 138        |
| Entry 10: 5'                                                    | 141        |
| Entry 10: 3'                                                    | 144        |
| <b><i>Alcohol Selective Reactions: An Investigation</i></b>     | <b>154</b> |
| <b>Phosphoramidate Formation</b>                                | <b>154</b> |
| <b>Phosphoramidite Reaction</b>                                 | <b>155</b> |
| <b>Tosylation reaction</b>                                      | <b>156</b> |
| <b>Mitsunobu Reaction</b>                                       | <b>159</b> |
| <b>Williamson Ether Synthesis</b>                               | <b>162</b> |
| <b><i>Labeling of DNA Without Phosphate Blocking Groups</i></b> | <b>163</b> |
| <b>General Protocol and Optimization</b>                        | <b>163</b> |
| <b>Structure Confirmation of SI-23</b>                          | <b>197</b> |
| Mass Fragmentation of SI-23                                     | 198        |
| <b><i>T4PNK Phosphorylation then SENDR</i></b>                  | <b>199</b> |
| <b>Protocol</b>                                                 | <b>199</b> |
| <b><i>Sequence Independence</i></b>                             | <b>203</b> |
| <b>Procedure</b>                                                | <b>203</b> |
| <b>Characterization of Sequence Independence</b>                | <b>204</b> |
| LCMS Characterization of SI-26                                  | 204        |
| LCMS Characterization of SI-27                                  | 207        |
| LCMS Characterization of 3                                      | 210        |
| LCMS Characterization of SI-28                                  | 213        |
| LCMS Characterization of SI-29                                  | 216        |
| LCMS Characterization of SI-30                                  | 219        |
| LCMS Characterization of SI-31                                  | 222        |
| LCMS Characterization of SI-32                                  | 225        |
| LCMS Characterization of SI-33                                  | 228        |
| LCMS Characterization of 4                                      | 231        |

|                                                  |            |
|--------------------------------------------------|------------|
| LCMS Characterization of SI-34.....              | 234        |
| LCMS Characterization of SI-35.....              | 237        |
| LCMS Characterization of SI-36.....              | 240        |
| LCMS Characterization of SI-37.....              | 243        |
| <b>Substrate scope: .....</b>                    | <b>246</b> |
| <b>Procedure .....</b>                           | <b>246</b> |
| <b>Characterization of Substrate Scope .....</b> | <b>247</b> |
| LCMS Characterization of 5.....                  | 247        |
| LCMS Characterization of 6.....                  | 249        |
| LCMS Characterization of 7.....                  | 251        |
| LCMS Characterization of 8.....                  | 253        |
| LCMS Characterization of 9.....                  | 255        |
| LCMS Characterization of 10.....                 | 258        |
| LCMS Characterization of 11.....                 | 260        |
| LCMS Characterization of 12.....                 | 263        |
| LCMS Characterization of 13.....                 | 266        |
| LCMS Characterization of 14.....                 | 269        |
| LCMS Characterization of 15.....                 | 272        |
| LCMS Characterization of 16.....                 | 274        |
| LCMS Characterization of 17.....                 | 276        |
| LCMS Characterization of 18.....                 | 279        |
| LCMS Characterization of 19.....                 | 282        |
| LCMS Characterization of 20.....                 | 285        |
| LCMS Characterization of 21.....                 | 288        |
| LCMS Characterization of 22.....                 | 291        |
| LCMS Characterization of 23.....                 | 294        |
| LCMS Characterization of 24.....                 | 297        |
| LCMS Characterization of 25.....                 | 300        |
| LCMS Characterization of 26.....                 | 303        |
| LCMS Characterization of 27.....                 | 306        |
| LCMS Characterization of 28.....                 | 308        |
| LCMS Characterization of 29.....                 | 310        |
| LCMS Characterization of 30.....                 | 312        |
| LCMS Characterization of 31.....                 | 314        |
| LCMS Characterization of 32.....                 | 316        |
| LCMS Characterization of 33.....                 | 318        |
| LCMS Characterization of 34.....                 | 320        |
| LCMS Characterization of 35.....                 | 322        |
| LCMS Characterization of 36.....                 | 325        |
| LCMS Characterization of 37.....                 | 328        |
| LCMS Characterization of 38.....                 | 331        |
| LCMS Characterization of 39.....                 | 333        |
| LCMS Characterization of 40.....                 | 335        |
| LCMS Characterization of 41.....                 | 338        |
| <b>Secondary Manipulations: .....</b>            | <b>341</b> |
| <b>Azide Reduction (42):.....</b>                | <b>341</b> |
| LCMS Characterization of 42.....                 | 342        |
| <b>43 SPAAC Reaction:.....</b>                   | <b>344</b> |
| LCMS Characterization of 43.....                 | 345        |

|                                                               |            |
|---------------------------------------------------------------|------------|
| <b>44 CuAAC Reaction:</b> .....                               | <b>348</b> |
| LCMS Characterization of 44.....                              | 349        |
| <b>45 CuAAC Reaction:</b> .....                               | <b>352</b> |
| LCMS Characterization of 45.....                              | 353        |
| <b>Phosphorothioate (PS) compatibility:</b> .....             | <b>356</b> |
| <b>Protocol for SENDR on PS DNA:</b> .....                    | <b>356</b> |
| LCMS Characterization of 47.....                              | 357        |
| LCMS Characterization of 48.....                              | 359        |
| LCMS Characterization of 49.....                              | 361        |
| LCMS Characterization of 50.....                              | 363        |
| LCMS Characterization of 52.....                              | 365        |
| LCMS Characterization of 53.....                              | 368        |
| <b>SENDER on Aptamers:</b> .....                              | <b>371</b> |
| <b>Aptamer compatibility protocol:</b> .....                  | <b>371</b> |
| LCMS Characterization of 55.....                              | 372        |
| LCMS Characterization of S-57/ After SENDR .....              | 376        |
| LCMS Characterization of S-57/ After ExoIII Digestion .....   | 379        |
| LCMS Characterization of R-57/ SEDNR .....                    | 381        |
| LCMS Characterization of R-57/ After EXOIII .....             | 384        |
| Using (+)Ψ-14.....                                            | 384        |
| <b>hNE Inhibition Assay</b> .....                             | <b>386</b> |
| <b>Protocol</b> .....                                         | <b>386</b> |
| Raw Data.....                                                 | 387        |
| Plotted Data.....                                             | 388        |
| <b>Small Molecule Electrophiles</b> .....                     | <b>391</b> |
| <b>SENDER on Biosynthetically Derived DNA</b> .....           | <b>392</b> |
| <b>Construction of 58</b> .....                               | <b>392</b> |
| PCR Amplification:.....                                       | 392        |
| Analysis of Amplicons .....                                   | 393        |
| Lambda Exonuclease Degradation:.....                          | 396        |
| T4PNK Phosphorylation: .....                                  | 398        |
| Analysis of PCR and Enzymatic Modifications by DNA Gel: ..... | 400        |
| <b>SENDER: 58→59</b> .....                                    | <b>401</b> |
| <b>DNA BSA Conjugation</b> .....                              | <b>403</b> |
| <b>Procedure for the creation of 61</b> .....                 | <b>403</b> |
| LCMS Characterization of 61.....                              | 404        |
| <b>Procedure for the creation of 62</b> .....                 | <b>407</b> |
| Analysis of 62 .....                                          | 408        |
| <b>DNA DVD Conjugation</b> .....                              | <b>409</b> |
| <b>Procedure for the creation of SI-40</b> .....              | <b>409</b> |
| LCMS Characterization of SI-40.....                           | 410        |
| <b>Procedure for the creation 64</b> .....                    | <b>413</b> |

|                                                                                                        |            |
|--------------------------------------------------------------------------------------------------------|------------|
| LCMS Characterization of 64.....                                                                       | 414        |
| <b>DNA-DVD conjugation procedure.....</b>                                                              | <b>417</b> |
| Methodol Assay .....                                                                                   | 418        |
| Methodol Assay Raw Data: .....                                                                         | 419        |
| SDS PAGE Analysis.....                                                                                 | 420        |
| <b><i>Creation of Dual Labeled Probes: .....</i></b>                                                   | <b>421</b> |
| <b>Procedure For the Creation of 67-68 .....</b>                                                       | <b>421</b> |
| LCMS Characterization of SI-41.....                                                                    | 424        |
| LCMS Characterization of 67.....                                                                       | 427        |
| LCMS Characterization of 68.....                                                                       | 430        |
| LCMS Characterization of 68 After Enzymatic Cleanup .....                                              | 433        |
| LCMS Characterization of SI-42.....                                                                    | 436        |
| LCMS Characterization of 69.....                                                                       | 439        |
| Process for Mass Fragmentation of 68 .....                                                             | 442        |
| <b>nCov Probe Production .....</b>                                                                     | <b>445</b> |
| LCMS Characterization of SI-43.....                                                                    | 446        |
| LCMS Characterization of SI-44.....                                                                    | 449        |
| LCMS Characterization of SI-45.....                                                                    | 455        |
| LCMS Characterization of SI-46.....                                                                    | 458        |
| LCMS Characterization of SI-47.....                                                                    | 464        |
| LCMS Characterization of SI-48.....                                                                    | 467        |
| LCMS Characterization of 74 after SENDR with $\Psi$ -17 and lambda exo cleanup:.....                   | 470        |
| <b><i>Comparison Between Kit and Microtube Format.....</i></b>                                         | <b>473</b> |
| <b>Procedure .....</b>                                                                                 | <b>473</b> |
| LCMS Characterization of 3.....                                                                        | 474        |
| <b><i>Synthesis of Small Molecule Alcohols for use in <math>\Psi</math>-Module Synthesis .....</i></b> | <b>477</b> |
| <b>Synthesis of SI-49.....</b>                                                                         | <b>477</b> |
| <b>Synthesis of SI-50.....</b>                                                                         | <b>477</b> |
| <b>Synthesis of SI-51.....</b>                                                                         | <b>477</b> |
| <b>Synthesis of SI-52.....</b>                                                                         | <b>477</b> |
| <b>Synthesis of SI-53.....</b>                                                                         | <b>478</b> |
| <b>Synthesis of SI-54.....</b>                                                                         | <b>478</b> |
| <b>Synthesis of SI-55.....</b>                                                                         | <b>478</b> |
| <b>Synthesis of SI-56.....</b>                                                                         | <b>478</b> |
| <b>Synthesis of SI-57.....</b>                                                                         | <b>479</b> |
| <b>Synthesis of SI-58.....</b>                                                                         | <b>479</b> |
| <b>Synthesis of SI-59.....</b>                                                                         | <b>479</b> |
| <b>Synthesis of SI-60.....</b>                                                                         | <b>479</b> |
| <b>Synthesis of SI-61.....</b>                                                                         | <b>480</b> |
| <b>Synthesis of SI-62.....</b>                                                                         | <b>480</b> |

---

---

**References..... 481**

---

## General Experimental

Tetrahydrofuran (THF), *N,N*-dimethylformamide (DMF), and dichloromethane (DCM) and acetonitrile (MeCN) were obtained by passing the previously degassed solvents through an activated alumina column. DMA was purchased from Sigma-Aldrich and used without further drying. (+)- $\Psi$  and (-)- $\Psi$  were obtained from Sigma-Aldrich. DIC (*N,N'*-diisopropylcarbodiimide) was purchased from Oakwood. Deionized water was used in all the reactions, unless otherwise stated. All the other reagents were purchased at the highest commercial quality and used without further purification, unless otherwise stated. NaClO<sub>4</sub> was purchased at the highest commercial grade from Acros Organics. DNA tags was obtained from IDT, Inc., Coralville, IA. Recombinant All enzymes (Shrimp Alkaline Phosphatase (rSAP), ExoIII, T4PNK, and Lambda Exo) was obtained from New England Biolabs, Ipswich, MA. The Cut Smart buffer stock used enzymatic reactions was obtained from New England Biolabs, Ipswich, MA. UltraPure™ Agarose was obtained from Invitrogen, Carlsbad, CA. 50X TAE Buffer (Tris-acetate-EDTA) was obtained from Thermo Fisher Scientific, Waltham, MA. SYBR™ Safe DNA Gel Stain (10,000X) was obtained from Invitrogen, Carlsbad, CA. Gel Loading Dye, Purple (6X), no SDS was obtained from New England Biolabs, Ipswich, MA.

Yields under normal organic conditions refer to chromatographically and spectroscopically (<sup>1</sup>H, <sup>31</sup>P NMR) homogeneous material, unless otherwise stated. TLC was performed using 0.25 mm E. Merck silica plates (60F-254), using short-wave UV light as the visualizing agent, and phosphomolybdic acid or KMnO<sub>4</sub> and heat as developing agents. NMR spectra were recorded on Bruker DRX-600, DRX-500, and AMX-400 instruments and are calibrated using residual undeuterated solvent (CHCl<sub>3</sub> at 7.26 ppm <sup>1</sup>H NMR, 77.16 ppm <sup>13</sup>C NMR). The following abbreviations were used to explain multiplicities: s = singlet, d = doublet, t = triplet, q = quartet, m = multiplet, br = broad. Column chromatography was performed using E. Merck silica gel (60, particle size 0.043–0.063 mm), and preparative TLC was performed on Merck silica plates (60F-254). High-resolution mass spectra (HRMS) were recorded on Agilent LC/MSD TOF mass spectrometer by electrospray ionization time of flight reflectron experiments. Melting points were recorded on a Fisher-Johns 12-144 melting point apparatus and are uncorrected.

*No unexpected or unusually high safety hazards were encountered.*

**PBS:** Phosphate buffered saline—was purchased from commercial and filtered before use. PBS is comprised of NaCl (137 mM), KCl (2.7 mM), Na<sub>2</sub>HPO<sub>4</sub> (10 mM), KH<sub>2</sub>PO<sub>4</sub> (1.8 mM), at pH 7.4.

**Elute Buffer:** DNA was eluted from resin using a sodium perchlorate buffer (1 M NaClO<sub>4</sub>, 40 mM Tris, 20% MeOH, at pH 8.5). This was prepared from NaClO<sub>4</sub> (Acros Organics), and filtered after preparation. This buffer could be stored on the bench indefinitely.

**HPLC-MS Analysis:** Six microliter of the DNA solution was analyzed on a Waters H-Class LC with a Waters BEH C18 column (2.1x55 mm, 1.7 μm, 130 Å) using a gradient of 114 mM HFIP and 14 mM Et<sub>3</sub>N in water (A) and methanol (B) (0.3 mL/min, 10-26 %B over 5 minutes) at 60° C. Peak identities were determined by ESI- using the 6- ion.

**HPLC-TOF High Resolution Analysis:** One microliter of the DNA solution was analyzed on a Waters I-Class LC with a Waters BEH C18 column (2.1x55 mm, 1.7 μm, 130 Å) using a gradient



---

of 114 mM HFIP and 14 mM Et<sub>3</sub>N in water (A) and methanol (B) (0.3 mL/min, 10-26 %B over 10 minutes) at 60° C. Peak identities were determined by ESI- using the 3- ion.

**Deconvolution:** data visualization and integration were performed with Mass Lynx V4.1 software.

**Conversion determination:** the yields of on-DNA products were determined from UV absorbance trace (260 nm) peak area using the equation: Yield%= UV(prod)/UV(total DNA recovered), while ignoring UV coefficient difference for all DNA products and assuming 100% of DNA total recovery. While determining yields, any non-oligo material (as determined by close examination of mass spectra) that absorbed UV 260 nm was subtracted out of the final yield calculation. These peaks were determined to not contain oligo material when a DNA indicative mass spectra was not observed, and are usually attributed to small molecules not removed during the ethanol precipitation. These peaks were generally found at or before 1 minute retention time during analysis.

**Preparative HPLC:** Was performed on the Waters H Class instrument described above using customized gradients for each compound of interest and an automatic divert valve.

**DNA starting materials.** All DNA starting materials used in this paper and their structures are shown below. DNA was purchased from IDT.

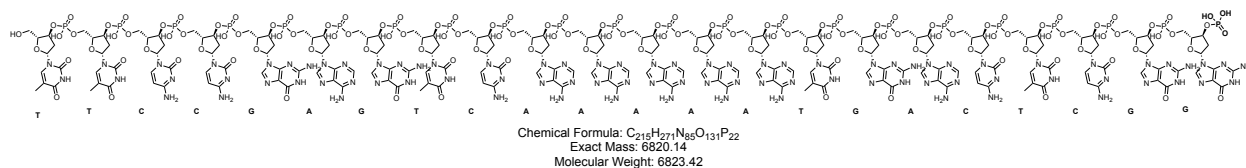

**Model DNA (1): 5'-TTCCGAGTCAAAAATGACTCGG/3Phos/-3'**

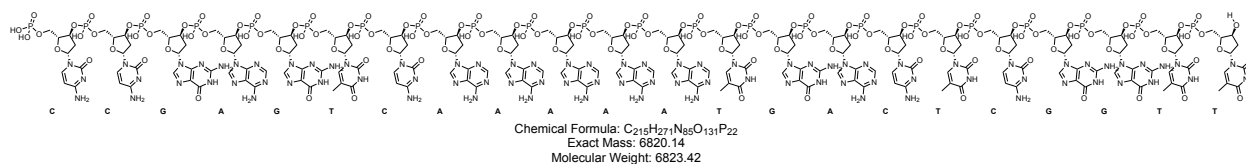

**Model DNA (2): /5Phos/CCGAGTCAAAAATGACTCGGTT**

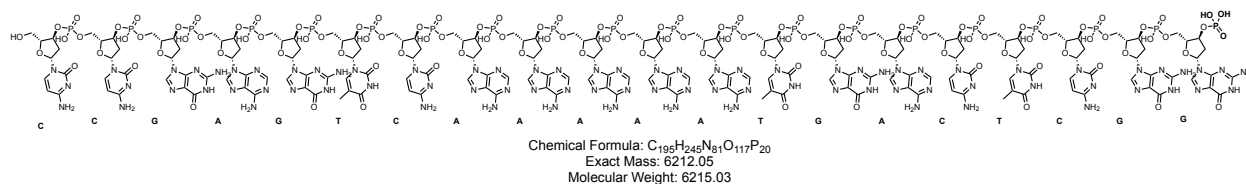

**Model DNA (SI-1): CCGAGTCAAAAATGACTCGG/3Phos/**

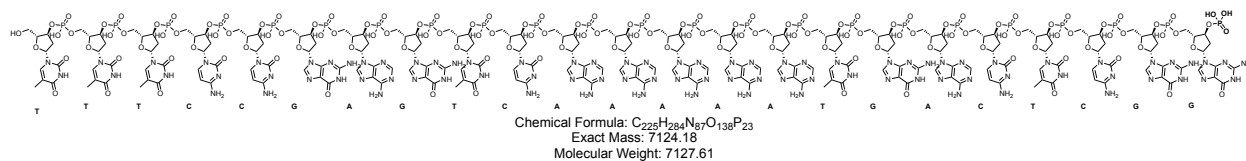

**Model DNA (SI-2): TTTCCGAGTCAAAAATGACTCGG/3Phos/**

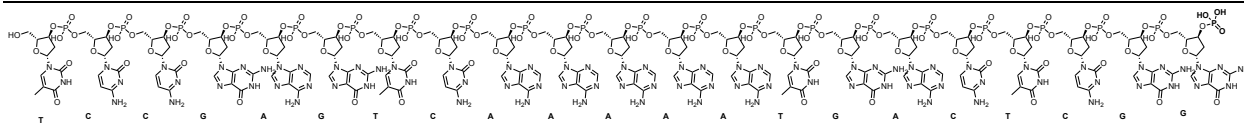

Chemical Formula:  $C_{205}H_{258}N_{83}O_{124}P_{21}$   
 Exact Mass: 6516.09  
 Molecular Weight: 6519.23

**Model DNA (SI-3): TCCGAGTCAAAAATGACTCGG/3Phos/**

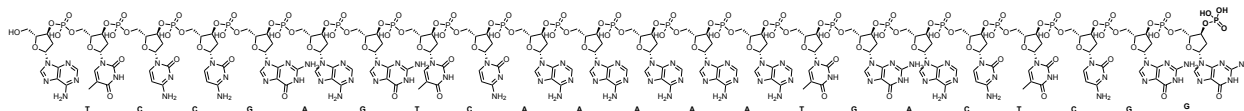

Chemical Formula:  $C_{214}H_{270}N_{88}O_{129}P_{22}$   
 Exact Mass: 6829.15  
 Molecular Weight: 6832.43

**Model DNA (SI-4): ATCCGAGTCAAAAATGACTCGG/3Phos/**

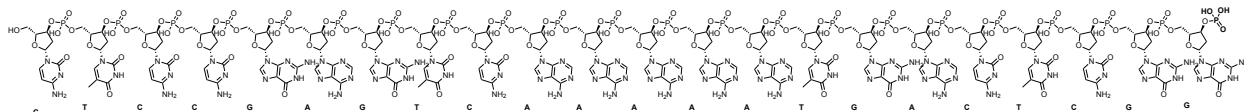

Chemical Formula:  $C_{214}H_{270}N_{88}O_{130}P_{22}$   
 Exact Mass: 6805.14  
 Molecular Weight: 6808.41

**Model DNA (SI-5): CTCCGAGTCAAAAATGACTCGG/3Phos/**

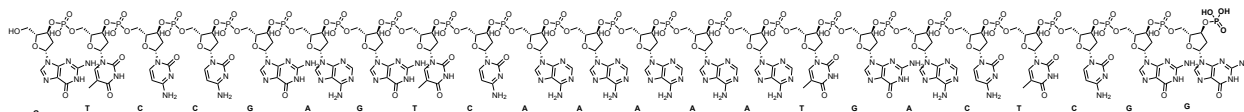

Chemical Formula:  $C_{215}H_{270}N_{88}O_{130}P_{22}$   
 Exact Mass: 6845.14  
 Molecular Weight: 6848.43

**Model DNA (SI-6): GTCCGAGTCAAAAATGACTCGG/3Phos/**

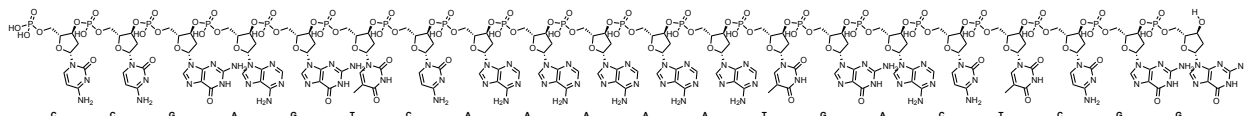

Chemical Formula:  $C_{195}H_{245}N_{81}O_{117}P_{20}$   
 Exact Mass: 6212.05  
 Molecular Weight: 6215.03

**Model DNA (SI-7): /5Phos/CCGAGTCAAAAATGACTCGG**

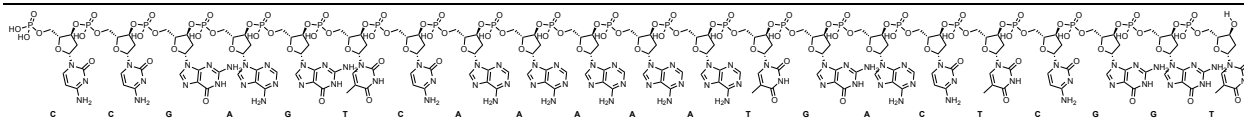

Chemical Formula:  $C_{205}H_{258}N_{83}O_{124}P_{21}$   
 Exact Mass: 6516.09  
 Molecular Weight: 6519.23

Model DNA (SI-8): /5Phos/CCGAGTCAAAAATGACTCGGT

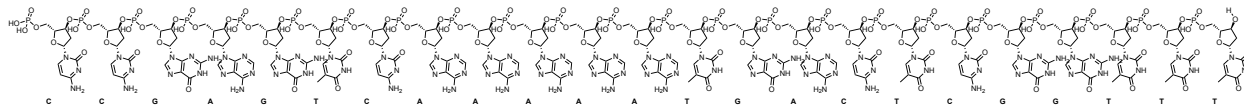

Chemical Formula:  $C_{222}H_{284}N_{87}O_{138}P_{23}$   
 Exact Mass: 7124.18  
 Molecular Weight: 7127.61

Model DNA (SI-9): /5Phos/CCGAGTCAAAAATGACTCGGTTT

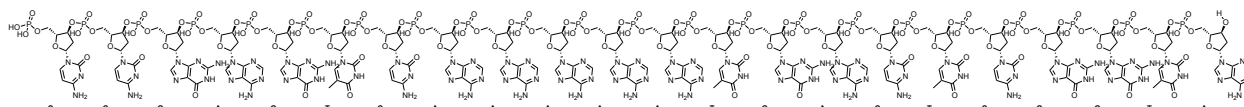

Chemical Formula:  $C_{215}H_{270}N_{88}O_{129}P_{22}$   
 Exact Mass: 6829.15  
 Molecular Weight: 6832.43

Model DNA (SI-10): /5Phos/CCGAGTCAAAAATGACTCGGTA

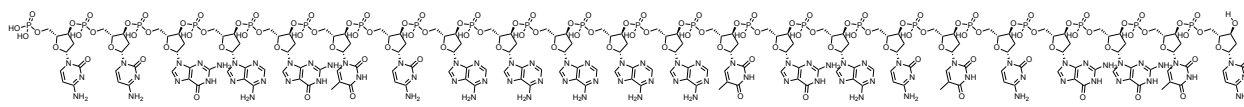

Chemical Formula:  $C_{214}H_{270}N_{88}O_{130}P_{22}$   
 Exact Mass: 6805.14  
 Molecular Weight: 6808.41

Model DNA (SI-11): /5Phos/CCGAGTCAAAAATGACTCGGTC

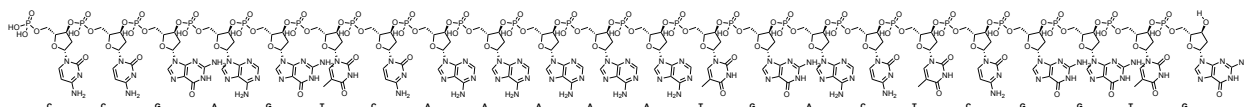

Chemical Formula:  $C_{215}H_{270}N_{88}O_{130}P_{22}$   
 Exact Mass: 6845.14  
 Molecular Weight: 6848.43

Model DNA (SI-12): /5Phos/CCGAGTCAAAAATGACTCGGTG

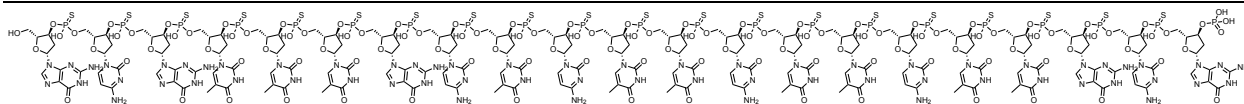

Chemical Formula:  $C_{204}H_{264}N_{63}O_{117}P_{21}S_{20}$   
 Exact Mass: 6757.55  
 Molecular Weight: 6762.33

Vitravene Analog DNA (46): G\*C\*G\*T\*T\*T\*G\*C\*T\*C\*T\*T\*C\*T\*T\*C\*T\*T\*G\*C\*G/3phos/  
 \* indicates phosphorothioate (PS) linkage

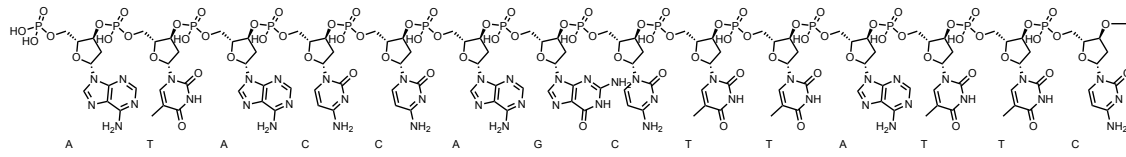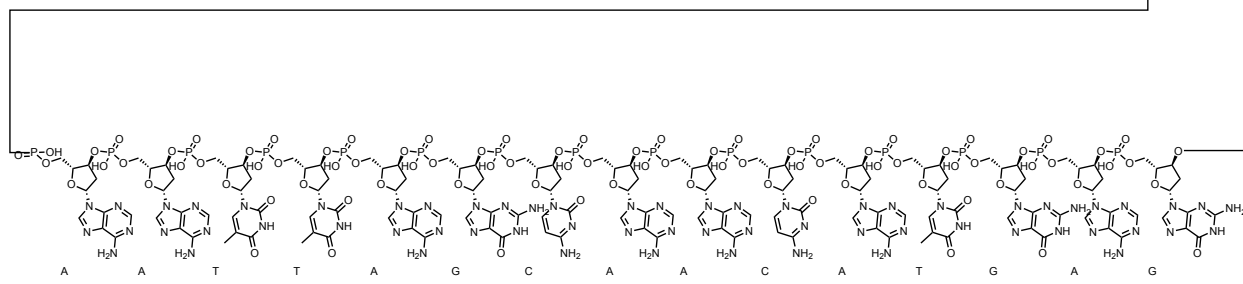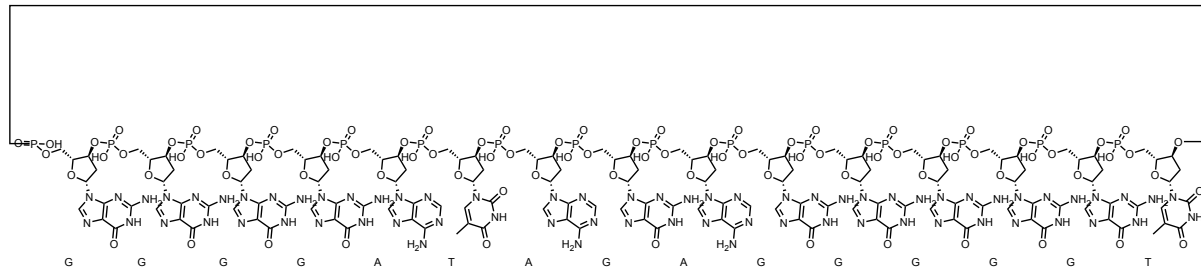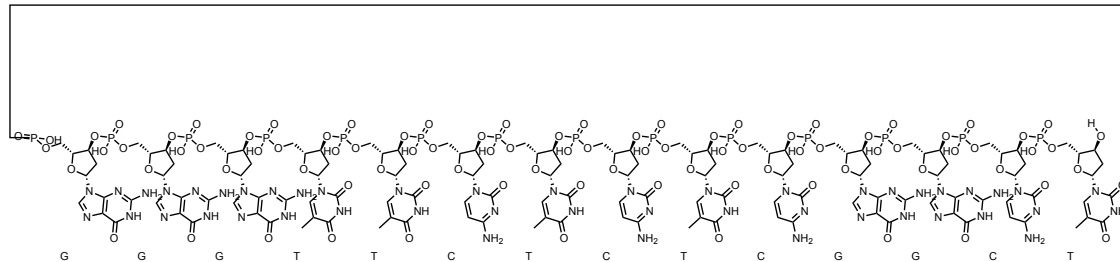

Chemical Formula:  $C_{570}H_{713}N_{225}O_{350}P_{58}$   
 Exact Mass: 18103.97  
 Molecular Weight: 18112.68

Protein Aptamer DNA (54): /5Phos/  
 ATACCAGCTTATTCAATTAGCAACATGAGGGGGATAGAGGGGGTGGGTTCTCTCGG  
 CT

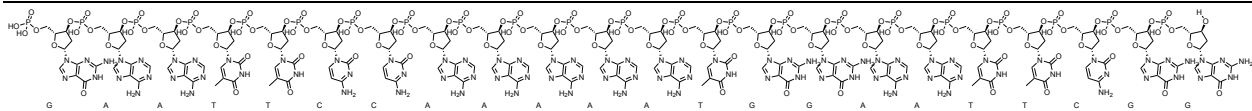

Chemical Formula:  $C_{217}H_{271}N_{89}O_{129}P_{22}$   
 Exact Mass: 6868.16  
 Molecular Weight: 6871.47

**Model DNA (60): /5Phos/GAATTCCAAAAATGGAATTCGG**

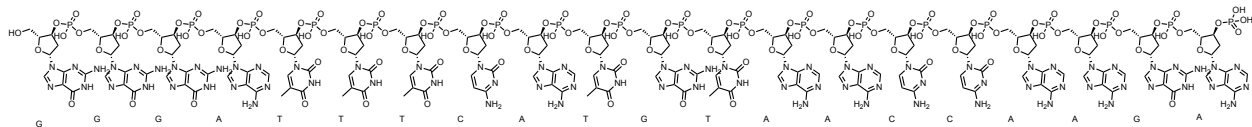

Chemical Formula:  $C_{197}H_{247}N_{79}O_{119}P_{20}$   
 Exact Mass: 6242.05  
 Molecular Weight: 6245.05

**cTegsedi (63): GGGATTTCATGTAACCAAGA/3Phos/**

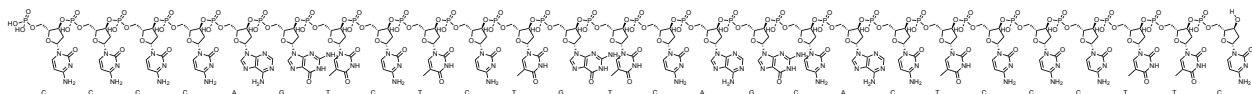

Chemical Formula:  $C_{247}H_{251}N_{93}O_{161}P_{26}$   
 Exact Mass: 7830.27  
 Molecular Weight: 7834.02

**TaqMan Probe Starting Material (66): /5Phos/CCCCAGTCTCTGTCAGCACTCCCTTC**

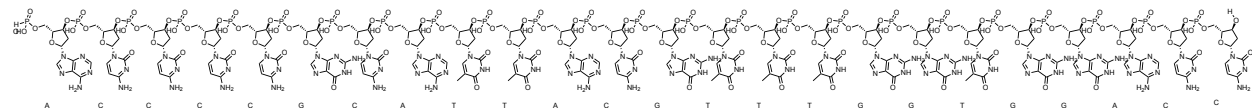

Chemical Formula:  $C_{232}H_{298}N_{95}O_{147}P_{24}$   
 Exact Mass: 7381.20  
 Molecular Weight: 7384.75

**2019-nCov-N1-P Starting Material (SI-13): /5Phos/ACCCCGCATTACGTTTGGTGGACC**

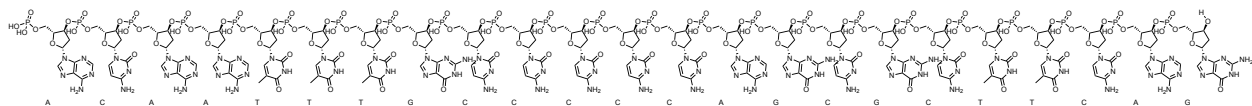

Chemical Formula:  $C_{221}H_{283}N_{92}O_{138}P_{23}$   
 Exact Mass: 7021.16  
 Molecular Weight: 7024.53

**2019-nCov-N2-P Starting Material (SI-14): /5Phos/ ACAATTTGCCCCCAGCGCTTCAG**

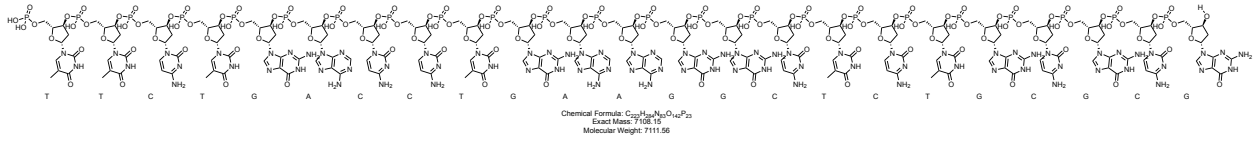

2019-nCov-N3-P Starting Material (SI-15): /5Phos/CCCCAGTCTCTGTCAGCACTCCCTTC

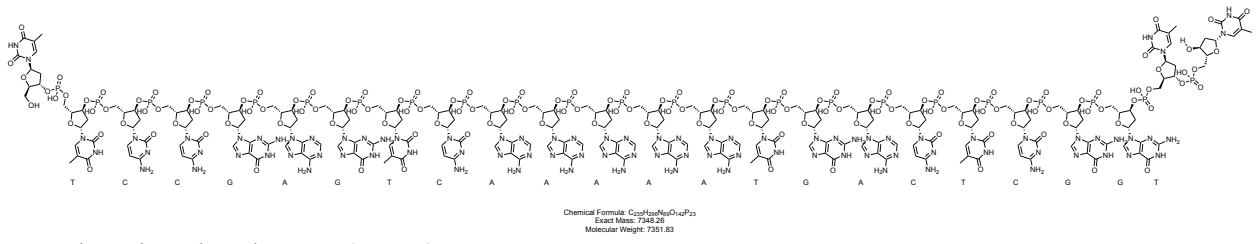

Nonphosphorylated DNA (SI-16): CCGAGTCAAAAATGACTCGGTT

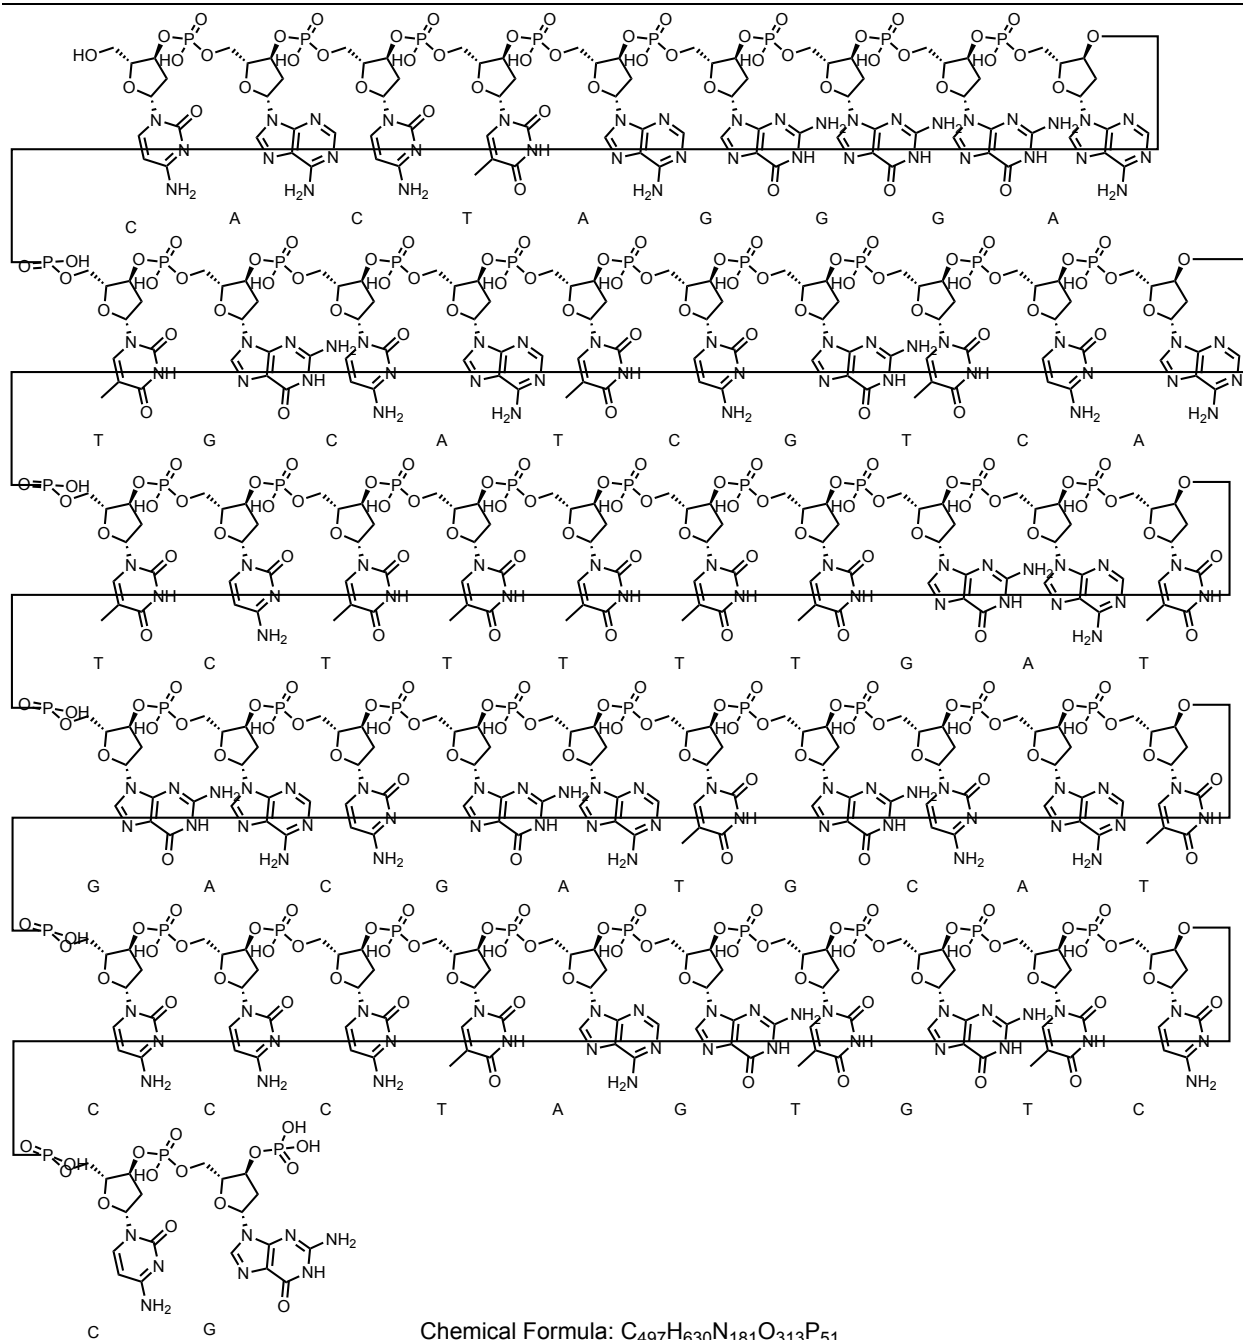

**High Tm DNA Hairpin (SI-17):**

CACTAGGGATGCATCGTCATCTTTTTGATGACGATGCATCCCTAGTGTCCG/3Phos/



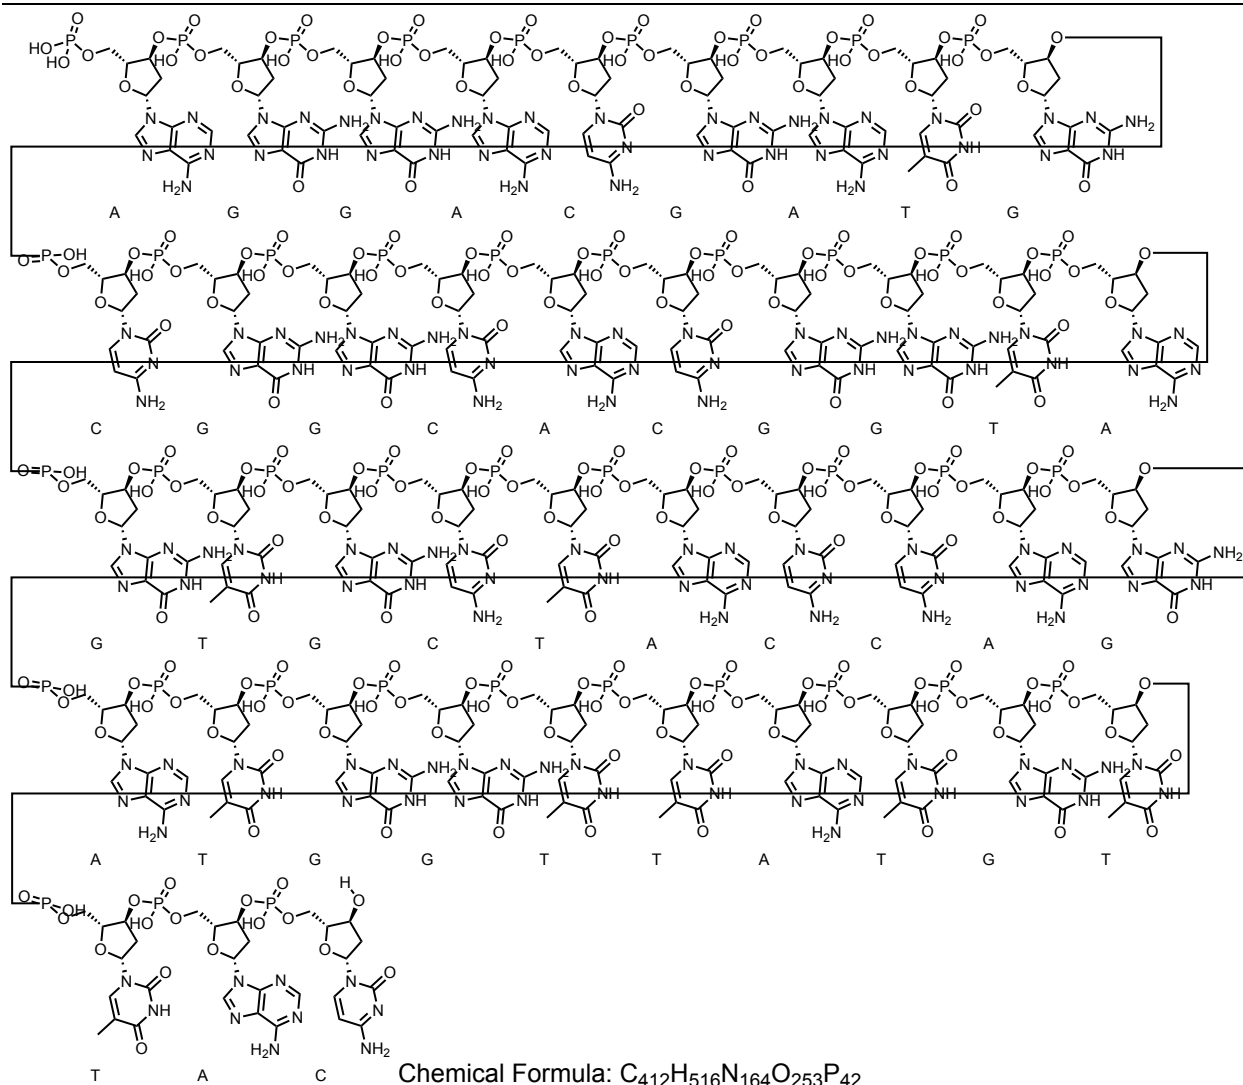

hNE Aptamer (**56**): /5Phos/ aggacgatgCGGCACGGTAGTGCTACCAGATGGTTATGTTAC

---

T/iMe-dC/A +G\*\*C\*\*A\* T\*T\*/iMe-dC/\* T\*A\*A\* T\*A\*G\* /iMe-dC/\*+A\*+G\* +C/3Phos/

MW: 6300.9

MALAT1 (52): T/iMe-dC/A +G\*\*C\*\*A\* T\*T\*/iMe-dC/\* T\*A\*A\* T\*A\*G\* /iMe-dC/\*+A\*+G\* +C/3Phos/

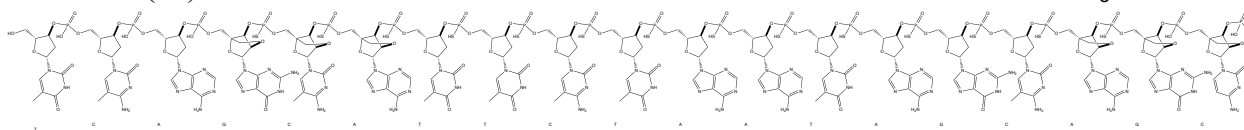

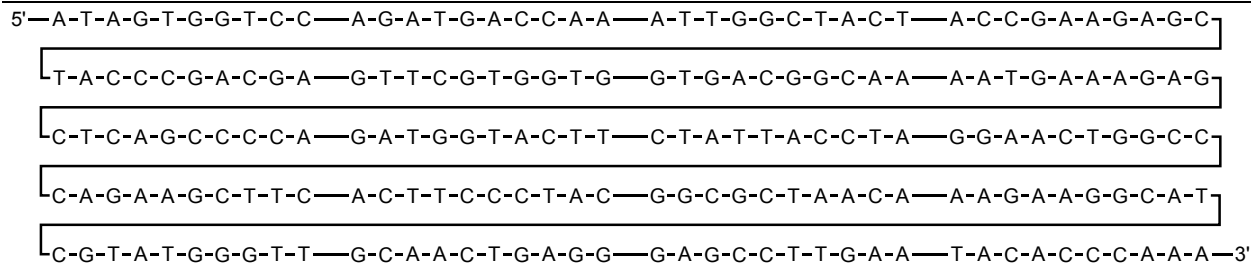

Chemical Formula: C<sub>1950</sub>H<sub>2442</sub>N<sub>780</sub>O<sub>1182</sub>P<sub>200</sub>  
 Exact Mass: 61884.25  
 Molecular Weight: 61914.02

**Template Strand (SI-18):**

/5Phos/atagtggctccagatgaccaaattggctactaccgaagagctaccggacgagttcgtgggtgacggcaaaatgaaagagctca  
 gccccagatggctactctattacctaggaactggcccagaagcttcacttcctacggcgctaacaagaaggcatcgtatgggtgcaact  
 gagggagccttgaatacacccaaa

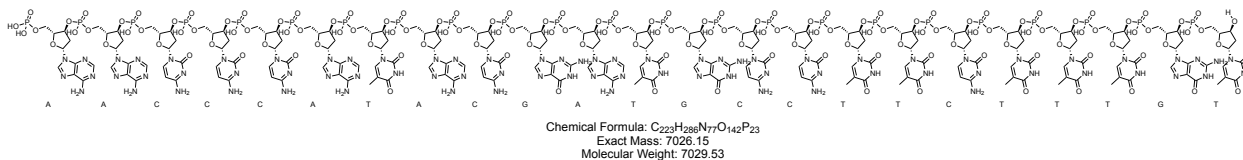

**Primer 1 (SI-19): /5Phos/aacctacgatgccttcttgt**

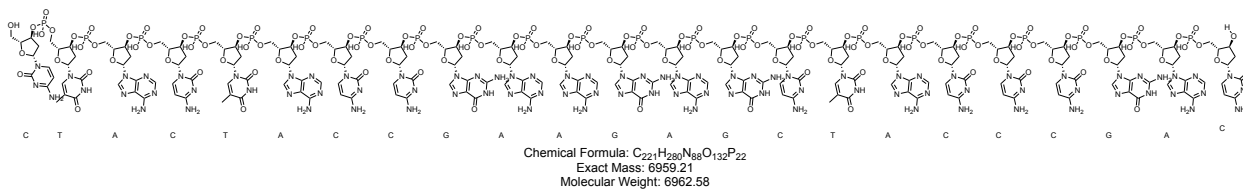

**Primer 2 (SI-20): ctactaccgaagagctaccggac**

---

## Synthesis and Characterization of $\Psi$ -modules

### General Procedure 1 - Synthesis of $\Psi$ -modules

The  $\Psi$ -modules were prepared as follow unless otherwise stated. Alcohol (1.0 equiv.) and (-)- $\Psi$  (1.3 equiv.) were dissolved in anhydrous MeCN or DCM (0.1 M) in a flame-dried round-bottom flask. DBU (1.2 equiv.) was added to the reaction mixture while stirring. After 5-10 minutes, the crude reaction mixture was diluted with EtOAc or Et<sub>2</sub>O and transferred to a separatory funnel. The organic layer was washed with H<sub>2</sub>O, saturated aqueous KH<sub>2</sub>PO<sub>4</sub> and brine. After drying over MgSO<sub>4</sub> and filtration, the solvent was removed *in vacuo*. The crude product was purified by silica gel column chromatography unless otherwise stated. Protocol adapted from.<sup>1</sup>

*No unexpected or unusually high safety hazards were encountered.*

Source of Alcohols used in Synthesis of  $\Psi$ -modules

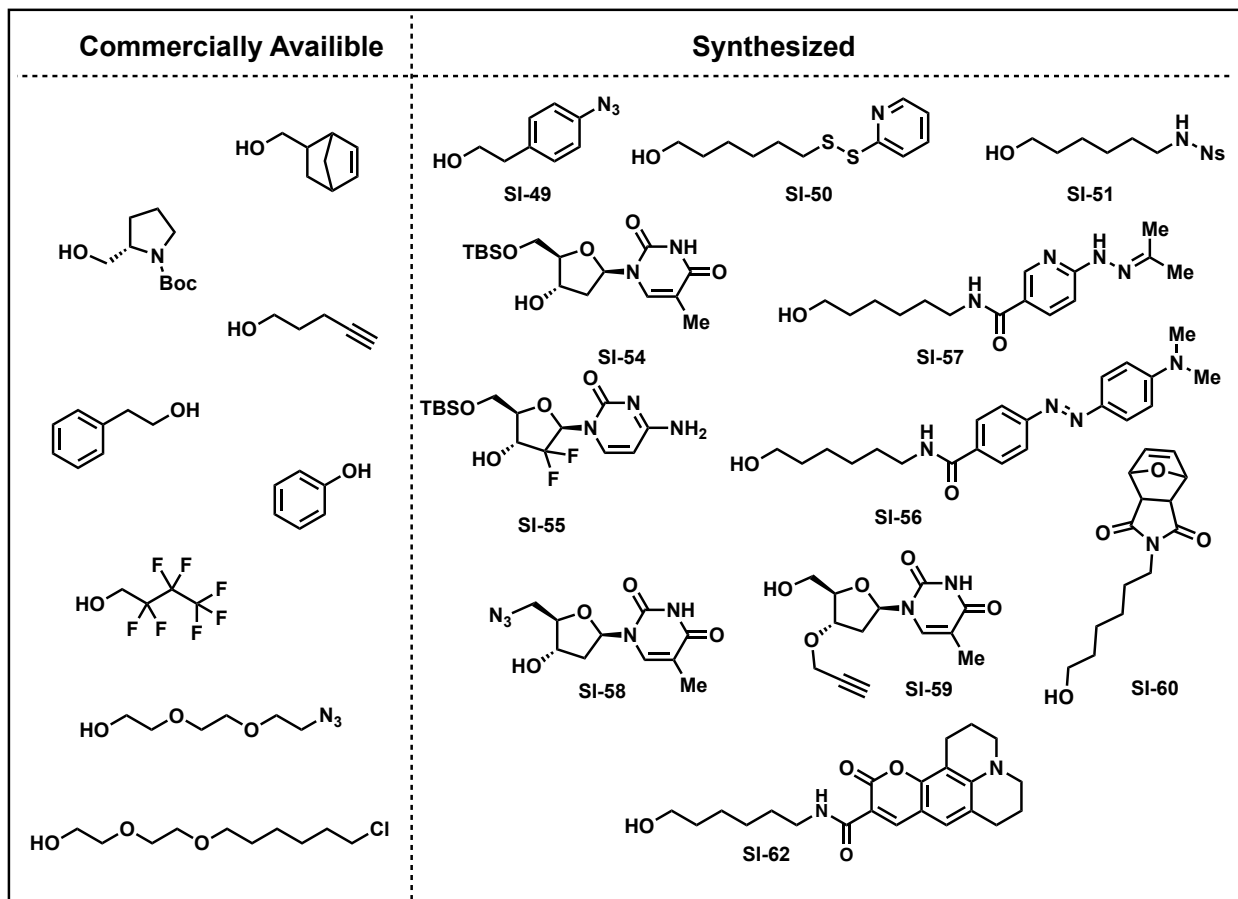



---

Ψ-2

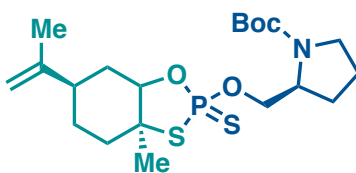

Prepared according to **General Procedure 1** using *N*-Boc-L-prolinol (0.40 g, 2.0 mmol). Purification using a gradient of 50% DCM in hexanes afforded **Ψ-2** (0.431 g, 0.96 mmol, 48% yield).

**Physical State:** Colorless Oil.

**R<sub>f</sub>** = 0.40 (100% DCM);

**<sup>1</sup>H NMR (600 MHz, Chloroform-*d*):** δ 4.99 (q, *J* = 1.5 Hz, 1H), 4.87 (s, 1H), 4.40 (d, *J* = 12.3 Hz, 1H), 4.16 (td, *J* = 9.6, 3.4 Hz, 2H), 3.98 (d, *J* = 63.5 Hz, 1H), 3.46 – 3.23 (m, 2H), 2.62 – 2.51 (m, 1H), 2.28 (dd, *J* = 13.1, 3.7 Hz, 1H), 2.10 (td, *J* = 13.5, 4.2 Hz, 1H), 2.02 – 1.83 (m, 6H), 1.83 – 1.66 (m, 8H), 1.47 (d, *J* = 8.5 Hz, 9H);

**<sup>13</sup>C NMR (151 MHz, Chloroform-*d*):** δ 154.66, 154.40, 145.39, 145.20, 111.83, 85.85, 80.03, 79.58, 68.70, 68.65, 68.23, 65.56, 65.37, 56.49, 46.98, 46.82, 39.04, 34.02, 33.96, 28.86, 28.66, 27.82, 27.74, 23.94, 23.57, 23.19, 22.82, 21.82;

**<sup>31</sup>P NMR (162 MHz, Chloroform-*d*):** δ 101.67, 101.19;

**HRMS (ESI-TOF, *m/z*):** Calcd for [C<sub>20</sub>H<sub>34</sub>NO<sub>4</sub>PS<sub>2</sub>+H]<sup>+</sup> 464.1694; Found 464.1689.

---

---

Ψ-3

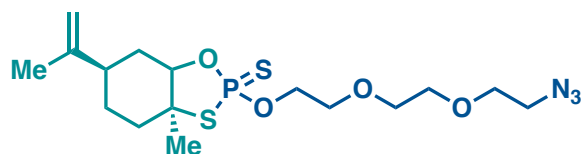

Prepared according to **General Procedure 1** using **2-(2-(2-azidoethoxy)ethoxy)ethan-1-ol** (0.70 g, 4.0 mmol). Purification using a gradient of 50-100% DCM in hexanes followed by 0-10% EtOAc in DCM afforded **Ψ-3** (0.809 g, 1.92 mmol, 48% yield).

**Physical State:** Colorless oil;

**R<sub>f</sub>** = 0.70 (100% DCM);

**<sup>1</sup>H NMR (400 MHz, Chloroform-*d*):** δ 4.98 (s, 1H), 4.87 (s, 1H), 4.44 (dd, J = 12.8, 3.3 Hz, 1H), 4.41 – 4.32 (m, 1H), 4.32 – 4.20 (m, 1H), 3.80 – 3.60 (m, 9H), 3.39 (t, J = 4.1 Hz, 2H), 2.57 (s, 1H), 2.27 (d, J = 13.6 Hz, 1H), 2.21 – 2.02 (m, 1H), 2.00 – 1.83 (m, 3H), 1.78 (s, 4H), 1.69 (d, J = 2.7 Hz, 3H);

**<sup>13</sup>C NMR (151 MHz, Chloroform-*d*):** δ 145.25, 111.86, 85.83, 70.83, 70.79, 70.26, 70.21, 70.17, 67.67, 67.62, 65.20, 50.83, 39.00, 33.86, 33.80, 27.90, 27.79, 23.50, 22.81, 21.80;

**<sup>31</sup>P NMR (162 MHz, Chloroform-*d*):** δ 102.15;

**HRMS (ESI-TOF, m/z):** Calcd for [C<sub>16</sub>H<sub>28</sub>N<sub>3</sub>O<sub>4</sub>PS<sub>2</sub>+H]<sup>+</sup> 422.1337; Found 422.1327.



---

Ψ-4

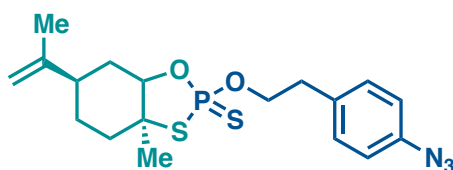

Prepared according to **General Procedure 1** using **SI-49** (0.326 g, 2.0 mmol). Purification using 15% EtOAc in hexane afforded **Ψ-4** (0.60 g, 1.5 mmol, 75% yield). *Due to the instability of this compound, it was used directly after a crude purification. Crude spectroscopic data could be obtained but not in its pure form.*

**Physical State:** Amorphous Crystalline Solid;

$R_f$  = 0.56 (15% EtOAc/Hexane);

**$^1\text{H}$  NMR (400 MHz, Chloroform-*d*):**  $\delta$  7.25 – 7.12 (m, 2H), 7.02 – 6.85 (m, 2H), 4.98 (s, 1H), 4.82 (s, 1H), 4.32 (ddt,  $J$  = 17.8, 10.7, 6.6 Hz, 3H), 2.97 (q,  $J$  = 5.1, 3.4 Hz, 2H), 2.56 (d,  $J$  = 6.4 Hz, 1H), 2.22 (d,  $J$  = 13.1 Hz, 1H), 2.05 (ddd,  $J$  = 14.2, 10.9, 4.4 Hz, 1H), 1.88 (dt,  $J$  = 18.6, 13.3, 5.3 Hz, 3H), 1.80 – 1.58 (m, 7H).;

**$^{31}\text{P}$  NMR (162 MHz, Chloroform-*d*):**  $\delta$  101.32;

**HRMS (ESI-TOF,  $m/z$ ):** Calcd for  $[\text{C}_{18}\text{H}_{24}\text{N}_3\text{O}_2\text{PS}_2+\text{H}]^+$  410.1126; Found 410.1135.

---

Ψ-5

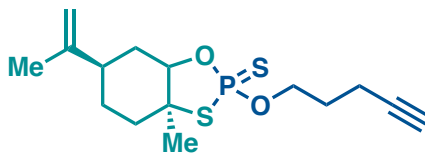

Prepared according to **General Procedure 1** using **4-pentynol** (1.26 g, 15.0 mmol). Purification using a gradient of 15-20% DCM in hexanes afforded **Ψ-5** (4.56 g, 13.8 mmol, 92%).

**Physical State:** Colorless Oil;

**R<sub>f</sub>** = 0.46 (50 % DCM in Hexanes);

**<sup>1</sup>H NMR (600 MHz, Chloroform-*d*):** δ 5.01 (q, J = 1.5 Hz, 1H), 4.90 – 4.86 (m, 1H), 4.44 (dt, J = 12.7, 3.3 Hz, 1H), 4.32 – 4.25 (m, 1H), 4.27 – 4.20 (m, 1H), 2.58 (t, J = 6.4 Hz, 1H), 2.30 (q, J = 8.4, 7.7, 2.3 Hz, 3H), 2.11 (td, J = 13.5, 4.3 Hz, 1H), 1.99 – 1.84 (m, 6H), 1.80 – 1.72 (m, 4H), 1.70 (s, 3H);

**<sup>13</sup>C NMR (151 MHz, Chloroform-*d*):** δ 144.63, 111.32, 85.22, 82.34, 68.73, 66.76 (d, J = 7.9 Hz), 64.87, 38.44, 33.34 (d, J = 9.0 Hz), 28.54 (d, J = 7.5 Hz), 27.27 (d, J = 15.5 Hz), 22.97, 22.20, 21.24, 14.49;

**<sup>31</sup>P NMR (162 MHz, Chloroform-*d*):** δ 101.32;

**[α]<sub>D</sub><sup>20</sup>** = -20 (c 2.0, CHCl<sub>3</sub>);

**HRMS (ESI-TOF, m/z):** Calcd for [C<sub>15</sub>H<sub>23</sub>O<sub>2</sub>PS<sub>2</sub>+H]<sup>+</sup> 331.0955; Found 331.0963.

---

Ψ-6

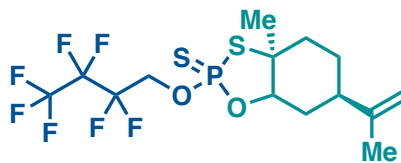

Prepared according to **General Procedure 1** using **2,2,3,3,4,4,4-heptafluorobutan-1-ol** (0.40 g, 2.0 mmol). Purification using a gradient of 10-20% DCM in hexanes afforded **Ψ-6** (0.249 g, 0.56 mmol, 28% yield).

**Physical State:** Colorless Oil;

**R<sub>f</sub>** = 0.55 (50% DCM/Hexane);

**<sup>1</sup>H NMR (400 MHz, Chloroform-*d*):** δ 5.01 (d, *J* = 2.3 Hz, 1H), 4.86 (s, 1H), 4.64 (dd, *J* = 25.1, 12.6 Hz, 1H), 4.57 – 4.44 (m, 2H), 2.60 (s, 1H), 2.31 (d, *J* = 13.6 Hz, 1H), 2.14 (td, *J* = 13.3, 4.0 Hz, 1H), 2.04 – 1.65 (m, 10H);

**<sup>13</sup>C NMR (151 MHz, Chloroform-*d*):** 144.78, 120.53, 118.85, 118.62, 118.40, 116.94, 116.72, 116.50, 115.79, 115.58, 115.53, 115.38, 115.32, 115.04, 114.82, 114.59, 114.08, 114.02, 113.88, 113.82, 113.67, 113.62, 112.37, 112.17, 112.11, 111.96, 110.89, 110.67, 110.41, 109.13, 108.91, 108.68, 108.65, 108.43, 107.37, 107.15, 106.89, 106.67, 86.06, 66.40, 63.13, 63.09, 62.94, 62.90, 62.76, 62.71, 39.01, 33.83, 33.77, 27.75, 27.65, 23.56, 22.54, 21.88;

**<sup>19</sup>F NMR (376 MHz, Chloroform-*d*):** δ -81.90 (t, *J* = 9.2 Hz), -121.62 (dq, *J* = 11.3, 7.5, 5.7 Hz), -128.39 (d, *J* = 3.6 Hz);

**<sup>31</sup>P NMR (162 MHz, Chloroform-*d*):** δ 103.51;

**HRMS (ESI-TOF, *m/z*):** Calcd for [C<sub>14</sub>H<sub>18</sub>F<sub>7</sub>O<sub>2</sub>PS<sub>2</sub>+H]<sup>+</sup> 447.0452; Found 447.0458.

---

Ψ-7

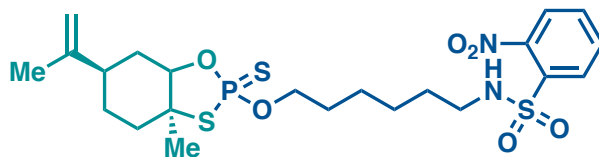

Prepared according to **General Procedure 1** using **SI-51** (0.90 g, 3.0 mmol). Purification using 25% EtOAc in hexanes afforded **Ψ-7** (1.0 g, 1.82 mmol, 61% yield).

**Physical State:** colorless solid;

$R_f$  = 0.28 (30% EtOAc/Hexane);

**$^1\text{H}$  NMR (400 MHz, Chloroform-*d*):** 8.17 – 8.11 (m, 1H), 7.90 – 7.84 (m, 1H), 7.80 – 7.72 (m, 2H), 5.25 (s, 1H), 4.99 (s, 1H), 4.86 (s, 1H), 4.45 – 4.37 (m, 1H), 4.13 – 4.10 (m, 2H), 3.10 (q,  $J$  = 6.8 Hz, 2H), 2.58 (s, 1H), 2.27 (d,  $J$  = 13.5 Hz, 1H), 2.15 – 2.05 (m, 1H), 1.90 (td,  $J$  = 21.4, 18.7, 14.3 Hz, 4H), 1.78 (s, 3H), 1.69 (d,  $J$  = 2.0 Hz, 3H), 1.62 (d,  $J$  = 6.5 Hz, 2H), 1.53 (d,  $J$  = 7.0 Hz, 2H), 1.33 (s, 4H);

**$^{13}\text{C}$  NMR (151 MHz, Chloroform-*d*):** 148.22, 145.25, 133.84, 133.73, 132.95, 131.21, 125.54, 111.83, 85.79, 68.72, 68.67, 65.41, 43.85, 39.00, 33.92, 33.86, 29.99, 29.95, 29.58, 27.91, 27.80, 26.08, 25.13, 23.52, 22.79, 21.80;

**$^{31}\text{P}$  NMR (162 MHz, Chloroform-*d*):**  $\delta$  100.65;

**HRMS (ESI-TOF,  $m/z$ ):** Calcd for  $[\text{C}_{22}\text{H}_{33}\text{N}_2\text{O}_6\text{PS}_3+\text{H}]^+$  549.1317; Found 549.1326.

---

Ψ-8

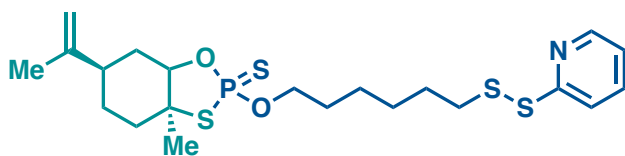

Prepared according to **General Procedure 1** using **SI-50** (1.35 g, 4.67 mmol). Purification using 100% DCM afforded **Ψ-8** (1.54 g, 3.15 mmol, 68% yield).

**Physical State:** Light Yellow Oil;

$R_f$  = 0.50 (100% DCM);

**$^1\text{H}$  NMR (600 MHz, Chloroform-*d*):**  $\delta$  8.45 (ddd,  $J$  = 4.9, 1.9, 0.9 Hz, 1H), 7.71 (dt,  $J$  = 8.1, 1.1 Hz, 1H), 7.64 (td,  $J$  = 7.7, 1.8 Hz, 1H), 7.08 (ddd,  $J$  = 7.4, 4.8, 1.1 Hz, 1H), 4.98 (q,  $J$  = 1.4 Hz, 1H), 4.87 – 4.84 (m, 1H), 4.42 (dt,  $J$  = 12.8, 3.3 Hz, 1H), 4.19 – 4.07 (m, 2H), 2.79 (t,  $J$  = 7.3 Hz, 2H), 2.57 (s, 1H), 2.27 (ddt,  $J$  = 15.0, 3.2, 1.7 Hz, 1H), 2.09 (td,  $J$  = 13.5, 4.2 Hz, 1H), 1.98 – 1.91 (m, 1H), 1.91 – 1.82 (m, 2H), 1.79 – 1.73 (m, 4H), 1.73 – 1.63 (m, 7H), 1.42 (pd,  $J$  = 7.1, 3.0 Hz, 2H), 1.41 – 1.31 (m, 2H);

**$^{13}\text{C}$  NMR (151 MHz, Chloroform-*d*):**  $\delta$  160.67, 149.73, 145.22, 137.10, 120.67, 119.72, 111.86, 85.71, 68.86 (d,  $J$  = 8.2 Hz), 65.35, 38.96 (d,  $J$  = 14.8 Hz), 33.90 (d,  $J$  = 8.8 Hz), 30.06 (d,  $J$  = 6.8 Hz), 28.86, 28.07, 27.91, 27.81, 25.30, 23.54, 22.81, 21.80;

**$^{31}\text{P}$  NMR (162 MHz, Chloroform-*d*):**  $\delta$  101.01;

**HRMS (ESI-TOF,  $m/z$ ):** Calcd for  $[\text{C}_{21}\text{H}_{32}\text{NO}_2\text{PS}_4+\text{H}]^+$  490.1132; Found 490.1140.

---

Ψ-9

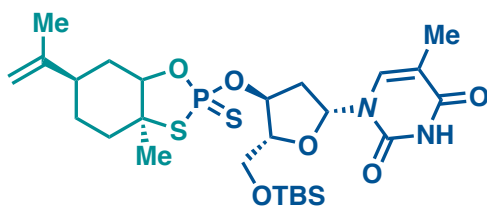

Prepared according to **General Procedure 1** using **SI-54** (1.0 g, 4.67 mmol). Purification using a gradient of 20-30% EtOAc in hexanes afforded **Ψ-9** (0.80 g, 1.3 mmol, 28% yield).

**Physical State:** White foam;

**R<sub>f</sub>** = 0.52 (50% EtOAc/hexanes)

**<sup>1</sup>H NMR (400 MHz, Chloroform-*d*):** δ 8.41 (s, 1H), 7.54 (s, 1H), 6.39 (dd, *J* = 8.9, 5.5 Hz, 1H), 5.34 (dd, *J* = 11.7, 5.7 Hz, 1H), 5.07 (s, 1H), 4.92 (s, 1H), 4.47 (d, *J* = 12.7 Hz, 1H), 4.26 (s, 1H), 3.97 – 3.85 (m, 2H), 2.59 (s, 1H), 2.49 (dd, *J* = 13.8, 5.5 Hz, 1H), 2.33 (d, *J* = 13.5 Hz, 1H), 2.23 – 2.07 (m, 2H), 2.04 – 1.86 (m, 6H), 1.80 (s, 3H), 1.77 – 1.60 (m, 4H), 0.92 (t, *J* = 2.7 Hz, 9H), 0.13 (t, *J* = 2.8 Hz, 6H);

**<sup>13</sup>C NMR (151 MHz, Chloroform-*d*):** δ 163.73, 150.33, 144.77, 135.24, 112.34, 111.34, 86.26, 86.22, 86.17, 86.04, 84.78, 79.88, 79.83, 66.05, 63.55, 39.72, 39.69, 38.96, 33.81, 33.74, 28.32, 27.90, 27.80, 26.09, 23.50, 22.77, 21.89, 18.48, 12.62, -5.23, -5.25, -5.42;

**<sup>31</sup>P NMR (162 MHz, Chloroform-*d*):** δ 101.18.

**HRMS (ESI-TOF, *m/z*):** Calcd for [C<sub>26</sub>H<sub>43</sub>N<sub>2</sub>O<sub>6</sub>PS<sub>2</sub>Si+H]<sup>+</sup> 603.2148; Found 603.2147.

---

Ψ-10

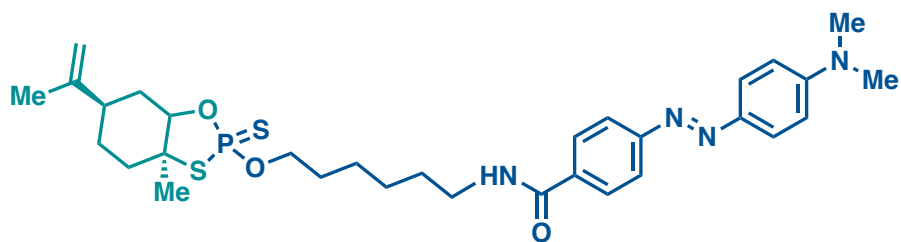

Prepared according to **General Procedure 1** using **SI-56** (0.368 g, 1.0 mmol). Purification using a gradient of 20-50% EtOAc in hexanes afforded **Ψ-10** (0.382 g, 0.62 mmol, 62% yield).

**Physical State:** dark orange foam;

**R<sub>f</sub>** = 0.58 (50% EtOAc/Hexane);

**<sup>1</sup>H NMR (400 MHz, Chloroform-*d*):** δ 8.06 – 7.68 (m, 6H), 6.76 (d, *J* = 8.6 Hz, 2H), 6.19 (s, 1H), 5.00 (s, 1H), 4.87 (s, 1H), 4.44 (d, *J* = 12.9 Hz, 1H), 4.17 (t, *J* = 7.9 Hz, 2H), 3.48 (d, *J* = 6.9 Hz, 3H), 3.11 (p, *J* = 1.9 Hz, 6H), 2.57 (s, 1H), 2.29 (s, 1H), 2.16 – 2.03 (m, 1H), 1.92 (dd, *J* = 25.4, 14.3 Hz, 2H), 1.71 (dd, *J* = 32.2, 18.3 Hz, 10H), 1.45 (s, 5H);

**<sup>13</sup>C NMR (151 MHz, Chloroform-*d*):** δ 167.17, 154.94, 152.98, 145.23, 143.73, 134.92, 127.90, 125.67, 122.34, 111.89, 111.73, 85.78, 68.90, 68.85, 65.38, 40.50, 40.13, 39.02, 33.93, 33.88, 30.11, 30.07, 29.73, 27.93, 27.82, 26.58, 25.39, 23.54, 22.81, 21.81;

**<sup>31</sup>P NMR (162 MHz, Chloroform-*d*):** δ 101.78;

**HRMS (ESI-TOF, *m/z*):** Calcd for [C<sub>31</sub>H<sub>43</sub>N<sub>4</sub>O<sub>3</sub>PS<sub>2</sub>+H]<sup>+</sup> 615.2592; Found 615.2593.

---

Ψ-11

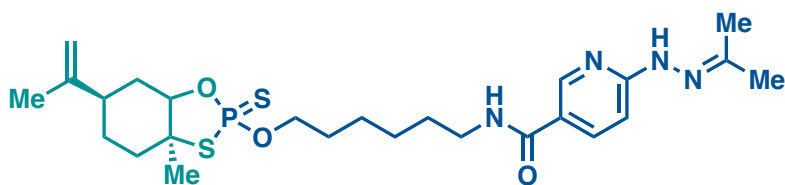

Prepared according to **General Procedure 1** using **SI-57** (0.292 g, 1.0 mmol). Purification using a gradient of 75-100% EtOAc in hexanes afforded **Ψ-11** (0.35 g, 0.65 mmol, 65% yield).

**Physical State:** Amorphous solid;

**R<sub>f</sub>** = 0.32 (100% EtOAc);

**<sup>1</sup>H NMR (400 MHz, Chloroform-*d*):** δ 8.52 (s, 1H), 7.94 (d, *J* = 9.0 Hz, 1H), 7.17 (d, *J* = 8.9 Hz, 1H), 6.24 (s, 1H), 4.97 (s, 1H), 4.84 (s, 1H), 4.40 (d, *J* = 12.8 Hz, 1H), 4.13 – 4.09 (m, 2H), 3.40 (q, *J* = 7.0 Hz, 2H), 2.55 (s, 1H), 2.25 (d, *J* = 13.6 Hz, 1H), 2.04 (s, 3H), 1.87 (d, *J* = 15.8 Hz, 6H), 1.71 (d, *J* = 34.1 Hz, 8H), 1.59 (s, 2H), 1.39 (d, *J* = 6.5 Hz, 4H) ;

**<sup>13</sup>C NMR (151 MHz, Chloroform-*d*):** δ 165.64, 158.20, 152.28, 148.76, 147.96, 146.17, 145.22, 137.73, 135.23, 123.65, 121.76, 111.88, 107.05, 85.78, 68.90, 68.84, 65.38, 39.97, 39.02, 33.93, 33.87, 30.09, 30.05, 29.73, 27.92, 27.82, 26.54, 25.48, 25.35, 23.54, 22.81, 21.81, 16.36;

**<sup>31</sup>P NMR (162 MHz, Chloroform-*d*):** δ 101.18;

**HRMS (ESI-TOF, *m/z*):** Calcd for [C<sub>25</sub>H<sub>39</sub>N<sub>4</sub>O<sub>3</sub>PS<sub>2</sub>+H]<sup>+</sup> 539.2279; Found 539.2280.



---

---

Ψ-12

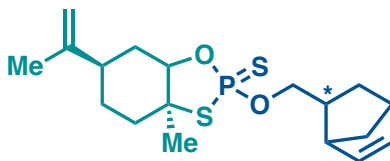

Prepared according to **General Procedure 1** using **5-Norbornene-2-methanol** (1.24 g, 10 mmol) with the following modifications : The crude reaction was diluted with hexanes (50 mL) then passed through a plug of SiO<sub>2</sub> and concentrated to dryness, the solvent was swapped to methanol and upon standing overnight the product crystallized. Isolation by filtration to afford **Ψ-12** (1.56g, 4.2 mmol, 42% yield) as a mixture of endo and exo isomers.

**Physical State:** Crystalline solid;

**<sup>1</sup>H NMR (400 MHz, Chloroform-*d*):** δ 6.16 (dt, *J* = 6.2, 3.2 Hz, 2H), 6.09 (s, 2H), 6.02 – 5.96 (m, 2H), 5.01 (s, 3H), 4.89 (s, 3H), 4.52 – 4.42 (m, 3H), 4.05 – 3.91 (m, 1H), 3.88 (d, *J* = 7.4 Hz, 1H), 3.72 (dt, *J* = 35.2, 11.4 Hz, 2H), 2.90 (d, *J* = 8.7 Hz, 2H), 2.83 (s, 2H), 2.74 (s, 1H), 2.59 (s, 3H), 2.47 (s, 2H), 2.29 (d, *J* = 13.4 Hz, 3H), 2.15 (s, 1H), 2.11 (d, *J* = 13.5 Hz, 2H), 1.98 (s, 1H), 1.96 – 1.83 (m, 7H), 1.54 (s, 3H), 1.46 (d, *J* = 8.5 Hz, 2H), 1.33 (d, *J* = 9.2 Hz, 2H), 1.26 (d, *J* = 8.3 Hz, 3H), 1.18 (d, *J* = 15.4 Hz, 1H), 0.54 (t, *J* = 12.2 Hz, 2H).

**<sup>13</sup>C NMR (151 MHz, CDCl<sub>3</sub>):** δ 144.67, 144.65, 144.64, 144.61, 137.32, 137.16, 136.64, 136.59, 135.73, 135.68, 131.75, 131.63, 111.28, 85.02, 84.99, 84.96, 84.92, 72.36, 72.30, 72.25, 72.19, 71.65, 71.60, 71.54, 64.83, 64.81, 64.77, 64.74, 48.85, 44.54, 44.50, 43.36, 43.31, 43.09, 42.97, 41.85, 41.81, 41.19, 41.15, 38.99, 38.95, 38.88, 38.84, 38.82, 38.77, 38.72, 38.48, 38.46, 33.40, 33.39, 33.36, 33.34, 33.33, 33.31, 28.90, 28.26, 28.16, 27.34, 27.32, 27.31, 27.24, 27.22, 27.20, 22.99, 22.19, 22.17, 21.26, 21.24.

**<sup>31</sup>P NMR (162 MHz, Acetone):** δ 101.15, 100.93, 100.64, 100.55;

**HRMS (ESI-TOF, *m/z*):** Calcd for [C<sub>18</sub>H<sub>27</sub>O<sub>2</sub>PS<sub>2</sub>+H]<sup>+</sup> 371.1268; Found 371.1273.

---

---

Ψ-13

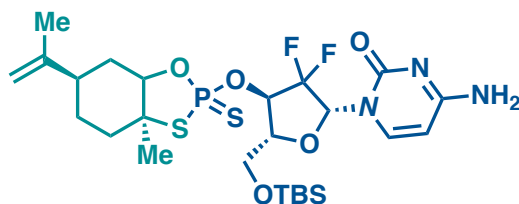

Prepared according to **General Procedure 1** using **SI-55** (0.377 g, 1.0 mmol). Purification using a gradient of 70-100% EtOAc in hexanes afforded **Ψ-13** (0.35 g, 0.56 mmol, 56% yield).

**Physical State:** White foam;

$R_f$  = 0.54 (100% EtOAc);

**$^1\text{H}$  NMR (600 MHz, Chloroform-*d*):**  $\delta$  7.71 (d,  $J$  = 7.6 Hz, 1H), 6.40 (t,  $J$  = 7.8 Hz, 1H), 5.81 (d,  $J$  = 7.6 Hz, 1H), 5.32 (dtd,  $J$  = 13.9, 10.2, 7.4 Hz, 1H), 5.02 (s, 1H), 4.86 (d,  $J$  = 1.9 Hz, 1H), 4.53 (dt,  $J$  = 12.8, 3.5 Hz, 1H), 4.11 (dd,  $J$  = 7.3, 2.3 Hz, 1H), 3.98 (dd,  $J$  = 11.9, 2.2 Hz, 1H), 3.86 (dd,  $J$  = 11.9, 2.2 Hz, 1H), 2.57 (d,  $J$  = 6.0 Hz, 1H), 2.30 (dd,  $J$  = 13.6, 3.0 Hz, 1H), 2.14 (td,  $J$  = 13.5, 4.2 Hz, 1H), 1.97 (ddt,  $J$  = 17.1, 4.4, 2.0 Hz, 1H), 1.90 (dt,  $J$  = 13.2, 3.4 Hz, 1H), 1.84 (td,  $J$  = 13.0, 5.6 Hz, 1H), 1.71 (d,  $J$  = 47.0 Hz, 7H), 0.92 (s, 9H), 0.12 (d,  $J$  = 11.8 Hz, 6H);

**$^{13}\text{C}$  NMR (151 MHz, Chloroform-*d*):**  $\delta$  166.38, 164.46, 154.10, 143.92, 140.83, 122.42, 120.69, 118.95, 111.60, 95.04, 85.28, 83.80, 83.59, 83.38, 79.55, 79.52, 79.49, 71.97, 71.92, 71.81, 71.76, 71.65, 71.60, 66.44, 59.60, 38.35, 33.16, 33.10, 27.12, 27.02, 25.44, 22.95, 21.97, 21.44, 17.87, -5.76, -5.97;

**$^{19}\text{F}$  NMR (376 MHz, Chloroform-*d*):**  $\delta$  -115.77;

**$^{31}\text{P}$  NMR (162 MHz, Chloroform-*d*):**  $\delta$  103.96;

**HRMS (ESI-TOF,  $m/z$ ):** Calcd for  $[\text{C}_{25}\text{H}_{40}\text{F}_2\text{N}_3\text{O}_5\text{PS}_2\text{Si}+\text{H}]^+$  624.1963; Found 624.1965.

---

---

$\Psi$ -(Rp)-14

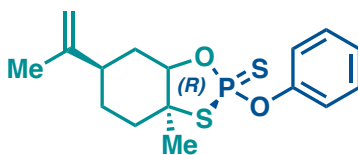

Prepared according to **General Procedure 1** using **phenol** (0.94 g, 10 mmol) with the following modifications: After the standard workup, the crude reaction was solvent swapped to methanol (50 mL) and upon standing for several hours the product crystallized. Isolation by filtration afforded  **$\Psi$ -(Rp)-14** (2.21 g, 6.5 mmol, 65% yield).

**Physical State:** crystalline colorless solid;

**$^1\text{H}$  NMR (600 MHz, Chloroform-*d*):**  $\delta$  7.34 (t,  $J = 7.9$  Hz, 2H), 7.20 (td,  $J = 7.4, 1.4$  Hz, 1H), 7.20 – 7.13 (m, 2H), 4.90 (q,  $J = 1.5$  Hz, 1H), 4.76 (d,  $J = 1.9$  Hz, 1H), 4.37 (dt,  $J = 12.8, 3.3$  Hz, 1H), 2.56 (t,  $J = 6.2$  Hz, 1H), 2.32 – 2.25 (m, 1H), 2.05 (td,  $J = 13.7, 13.0, 4.7$  Hz, 1H), 1.96 – 1.84 (m, 3H), 1.78 – 1.69 (m, 7H);

**$^{13}\text{C}$  NMR (151 MHz, Chloroform-*d*):**  $\delta$  150.82, 150.74, 144.75, 129.64, 129.63, 125.67, 125.66, 121.71, 121.68, 111.86, 86.57, 86.55, 65.80, 38.85, 33.83, 33.78, 27.74, 27.64, 23.41, 22.68, 21.87;

**$^{31}\text{P}$  NMR (162 MHz, Chloroform-*d*):**  $\delta$  96.40 ;

**HRMS (ESI-TOF,  $m/z$ ):** Calcd for  $[\text{C}_{16}\text{H}_{21}\text{O}_2\text{PS}_2+\text{H}]^+$  341.0799; Found 341.0800.

---

---

$\Psi$ -(Sp)-14

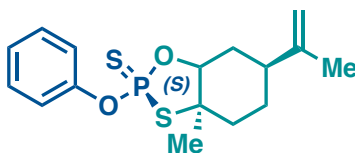

Prepared according to **General Procedure 1** using **phenol** (0.94 g, 10 mmol) with the following modifications: Using (+)- $\Psi$  (CAS Number : 2245335-71-9), after the standard workup, the crude reaction was solvent swapped to methanol (50 mL) and upon standing for several hours the product crystallized. Isolation by filtration afforded  $\Psi$ -(Sp)-14 (2.38 g, 7.0 mmol, 70% yield).

The product had identical characterization data to  $\Psi$ -(Rp)-14.

Ψ-15

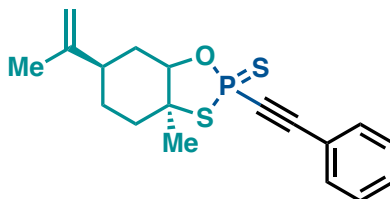

To a solution of (-)-Ψ (0.447 g, 1.0 mmol, 1 equiv.) in THF (10 mL) was added phenylethyne magnesium bromide (2.0 mL, 2.0 mmol, 2.0 equiv., 1.0 M solution, THF). After stirring for 2 hours the reaction was diluted with 1 : 1 Et<sub>2</sub>O/hexanes (50 mL) and washed consecutively with water, KH<sub>2</sub>PO<sub>4</sub> (saturated aqueous) and brine. The organic layer was dried over MgSO<sub>4</sub>, filtered and concentrated to a yellow oil. Purification in 10% Et<sub>2</sub>O in hexanes afforded Ψ-15 (0.25 g, 0.72 mmol, 72% yield).

**Physical State:** yellow amorphous solid;

**R<sub>f</sub>** = 0.4 (10% Et<sub>2</sub>O/hexanes);

**<sup>1</sup>H NMR (600 MHz, Chloroform-*d*):** δ 7.54 (dd, *J* = 7.1, 2.0 Hz, 2H), 7.44 (td, *J* = 7.4, 1.9 Hz, 1H), 7.37 (td, *J* = 7.8, 2.0 Hz, 2H), 5.02 – 4.97 (m, 1H), 4.91 (s, 1H), 4.56 (ddt, *J* = 12.8, 6.1, 2.8 Hz, 1H), 2.61 (d, *J* = 6.4 Hz, 1H), 2.41 – 2.35 (m, 1H), 2.19 – 2.08 (m, 1H), 1.97 (td, *J* = 11.0, 9.3, 3.4 Hz, 3H), 1.83 – 1.75 (m, 1H), 1.80 (s, 3H), 1.71 (s, 1H);

**<sup>13</sup>C NMR (151 MHz, Chloroform-*d*):** δ 145.29, 132.59, 132.57, 130.84, 128.64, 119.88, 119.85, 111.85, 101.85, 101.60, 86.73, 86.62, 85.33, 64.71, 38.98, 33.99, 33.93, 28.36, 28.26, 23.63, 22.84, 22.54;

**<sup>31</sup>P NMR (162 MHz, Chloroform-*d*):** δ 61.01;

**HRMS (ESI-TOF, *m/z*):** Calcd for [C<sub>18</sub>H<sub>21</sub>OPS<sub>2</sub>+H]<sup>+</sup> 349.0850; Found 349.0844.

Ψ-16

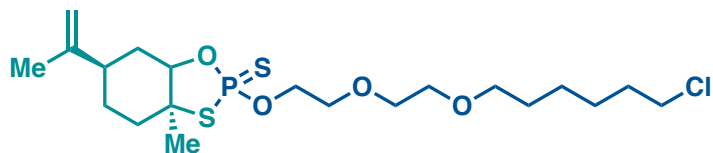

Prepared according to **General Procedure 1** using 2-(2-((6-chlorohexyl)oxy)ethoxy)ethan-1-ol (0.224 g, 1.00 mmol). Purified in 10-20% EtOAc in hexanes (0.146 g, 0.31 mmol, 31% yield).

**Physical State:** Yellow Oil

**R<sub>f</sub>** = 0.33 (15% EtOAc/Hexanes)

**<sup>1</sup>H NMR (600 MHz, Chloroform-*d*):** δ 4.97 (q, *J* = 1.5 Hz, 1H), 4.85 (d, *J* = 2.0 Hz, 1H), 4.43 (dt, *J* = 12.7, 3.2 Hz, 1H), 4.33 (dddd, *J* = 13.3, 11.4, 6.2, 4.0 Hz, 1H), 4.25 (dddd, *J* = 12.6, 11.4, 5.5, 3.9 Hz, 1H), 3.76 – 3.66 (m, 2H), 3.67 – 3.58 (m, 2H), 3.56 (dd, *J* = 5.5, 4.2 Hz, 2H), 3.52 (t, *J* = 6.7 Hz, 2H), 3.45 (t, *J* = 6.7 Hz, 2H), 2.59 – 2.54 (m, 1H), 2.26 (ddq, *J* = 13.5, 3.4, 1.7 Hz, 1H), 2.08 (td, *J* = 13.5, 4.3 Hz, 1H), 1.93 (ddt, *J* = 14.9, 4.4, 2.2 Hz, 1H), 1.92 – 1.82 (m, 2H), 1.80 – 1.71 (m, 6H), 1.68 (s, 3H), 1.62 – 1.52 (m, 2H), 1.48 – 1.40 (m, 2H), 1.42 – 1.32 (m, 2H);

**<sup>13</sup>C NMR (151 MHz, Chloroform-*d*):** δ 145.18, 111.85, 85.76, 71.38, 70.72, 70.19, 70.09, 70.05, 67.63, 67.58, 65.18, 45.17, 38.97, 33.83, 33.77, 32.63, 29.56, 27.86, 27.76, 26.79, 25.52, 23.47, 22.78, 21.78;

**<sup>31</sup>P NMR (162 MHz, Chloroform-*d*):** δ 102.07;

**HRMS (ESI-TOF, *m/z*):** Calcd for [C<sub>20</sub>H<sub>36</sub>ClO<sub>4</sub>PS<sub>2</sub> + H]<sup>+</sup> 471.1559; Found 471.1553

---

Ψ-17

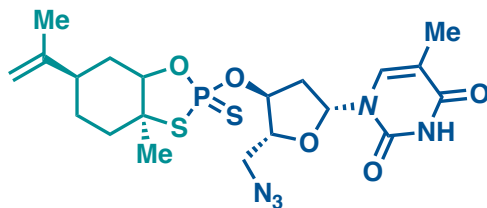

Prepared according to **General Procedure 1** using **SI-58** (1.4 g, 5.24 mmol). Purified in 30-50% EtOAc in hexanes (2.3 g, 4.48 mmol, 85% yield).

**Physical State:** white foam;

$R_f$  = 0.66 (60% EtOAc/Hexanes);

**$^1\text{H}$  NMR (600 MHz, Chloroform-*d*):**  $\delta$  8.34 (s, 1H), 7.36 (q,  $J$  = 1.3 Hz, 1H), 6.35 (dd,  $J$  = 8.6, 5.7 Hz, 1H), 5.26 (ddt,  $J$  = 11.5, 6.7, 2.4 Hz, 1H), 5.06 (q,  $J$  = 1.4 Hz, 1H), 4.92 – 4.88 (m, 1H), 4.45 (dt,  $J$  = 12.7, 3.2 Hz, 1H), 4.26 (q,  $J$  = 3.0 Hz, 1H), 3.80 – 3.70 (m, 2H), 2.60 (t,  $J$  = 6.1 Hz, 1H), 2.49 (ddd,  $J$  = 14.2, 5.7, 2.1 Hz, 1H), 2.35 – 2.23 (m, 2H), 2.13 (td,  $J$  = 13.5, 4.2 Hz, 1H), 1.98 – 1.85 (m, 6H), 1.80 (s, 3H), 1.80 – 1.72 (m, 1H), 1.70 (s, 3H);

**$^{13}\text{C}$  NMR (151 MHz, Chloroform-*d*):**  $\delta$  162.71, 149.64, 144.28, 134.36, 111.67, 111.36, 85.74, 83.88, 82.59, 82.55, 77.86, 77.81, 65.68, 51.75, 38.36, 38.16, 38.13, 33.27, 33.21, 27.31, 27.21, 22.93, 22.20, 21.32, 12.26;

**$^{31}\text{P}$  NMR (162 MHz, Chloroform-*d*):**  $\delta$  102.22 ;

**HRMS (ESI-TOF,  $m/z$ ):** Calcd for  $[\text{C}_{20}\text{H}_{28}\text{N}_5\text{O}_5\text{PS}_2+\text{H}]^+$  514.1348; Found 514.1350

Ψ-18

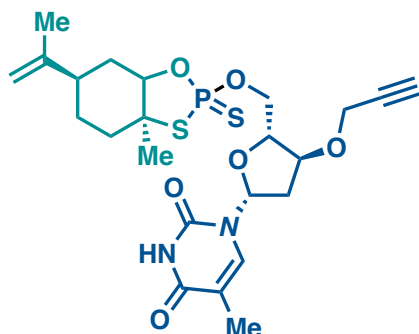

Prepared according to **General Procedure 1** using **SI-59** (1.4 g, 5.00 mmol). Purified in 50% EtOAc in hexanes (2.13 g, 4.05 mmol, 83% yield).

**Physical State:** white foam;

$R_f = 0.27$  (50% EtOAc/Hexanes);

**$^1\text{H}$  NMR (600 MHz, Chloroform-*d*):**  $\delta$  8.30 (s, 1H), 7.44 (q,  $J = 1.2$  Hz, 1H), 6.30 (dd,  $J = 8.4, 5.7$  Hz, 1H), 4.97 (q,  $J = 1.5$  Hz, 1H), 4.83 (dd,  $J = 2.1, 1.1$  Hz, 1H), 4.51 (ddd,  $J = 12.5, 11.5, 3.4$  Hz, 1H), 4.43 (ddd,  $J = 12.8, 3.6, 2.5$  Hz, 1H), 4.40 – 4.30 (m, 2H), 4.28 – 4.23 (m, 1H), 4.23 – 4.18 (m, 1H), 4.21 – 4.09 (m, 1H), 2.60 (s, 1H), 2.51 – 2.44 (m, 2H), 2.28 (ddt,  $J = 13.4, 3.2, 1.7$  Hz, 1H), 2.08 (td,  $J = 13.4, 4.2$  Hz, 1H), 2.04 (s, 1H), 2.01 – 1.93 (m, 5H), 1.95 – 1.90 (m, 1H), 1.92 – 1.85 (m, 1H), 1.82 – 1.72 (m, 7H);

**$^{13}\text{C}$  NMR (151 MHz, Chloroform-*d*):**  $\delta$  163.60, 150.04, 144.52, 134.86, 111.34, 110.95, 85.99, 84.42, 82.32, 82.27, 78.52, 78.01, 75.10, 67.08, 67.02, 65.50, 56.49, 38.34, 36.93, 33.31, 33.26, 27.27, 27.17, 22.85, 22.14, 21.23, 12.31;

**$^{31}\text{P}$  NMR (162 MHz, Chloroform-*d*):**  $\delta$  102.69;

**HRMS (ESI-TOF,  $m/z$ ):** Calcd for  $[\text{C}_{23}\text{H}_{31}\text{N}_2\text{O}_6\text{PS}_2+\text{H}]^+$  527.1439; Found 527.1431



---

Ψ-19

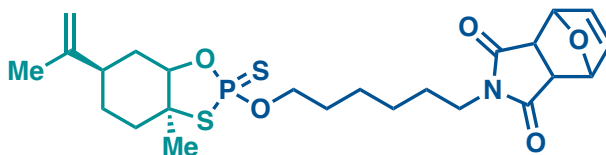

Prepared according to **General Procedure 1** using **SI-60** (0.60 g, 2.26 mmol). Purified in 50% EtOAc in hexanes (0.769 g, 1.50 mmol, 66% yield).

**Physical State:** yellow oil;

**R<sub>f</sub>** = 0.42 (50% EtOAc/hexanes);

**<sup>1</sup>H NMR (600 MHz, Chloroform-*d*):** δ 6.50 (s, 2H), 5.25 (s, 2H), 4.99 (s, 1H), 4.90 – 4.82 (m, 1H), 4.41 (dt, *J* = 12.8, 3.3 Hz, 1H), 4.12 (m, 2H), 3.46 (t, *J* = 7.3 Hz, 2H), 2.83 (s, 2H), 2.60 – 2.53 (m, 1H), 2.27 (m, 1H), 2.09 (td, *J* = 13.5, 4.3 Hz, 1H), 1.94 (m, 1H), 1.90 – 1.81 (m, 2H), 1.80 – 1.70 (m, 4H), 1.70 – 1.61 (m, 5H), 1.55 (m, 2H), 1.40 – 1.33 (m, 2H), 1.29 (m, 2H);

**<sup>13</sup>C NMR (151 MHz, Chloroform-*d*):** δ 176.4, 145.2, 136.7, 111.9, 85.7, 81.0, 68.9, 68.8, 65.3, 47.5, 39.0, 38.9, 33.9, 33.9, 30.0, 30.0, 27.9, 27.8, 27.6, 26.3, 25.2, 23.5, 22.8, 21.8;

**<sup>31</sup>P NMR (162 MHz, Chloroform-*d*):** δ 101.03;

**HRMS (ESI-TOF, *m/z*):** Calcd for [C<sub>24</sub>H<sub>34</sub>NO<sub>5</sub>PS<sub>2</sub>+H]<sup>+</sup> 512.1694; Found 512.1694

---

Ψ-20

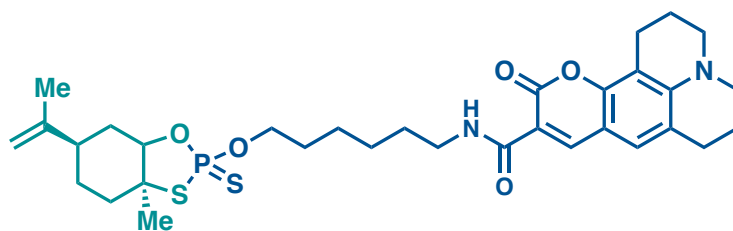

Prepared according to **General Procedure 1** using **SI-62** (0.60 g, 2.26 mmol). The crude solution was used directly for the SENDR reaction without workup or isolation.

## NMR Spectra

### Compound $\Psi$ -1 $^1\text{H}$ NMR

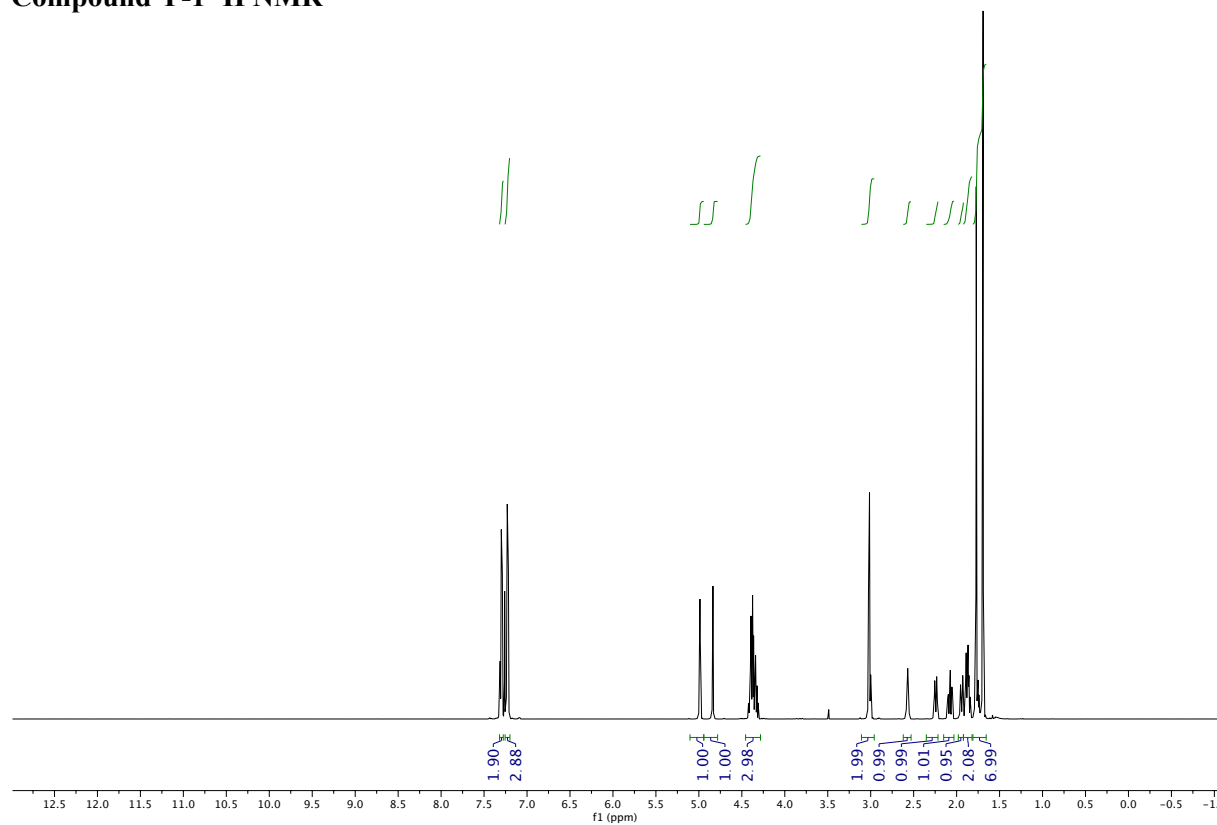

### Compound $\Psi$ -1 $^{13}\text{C}$ NMR

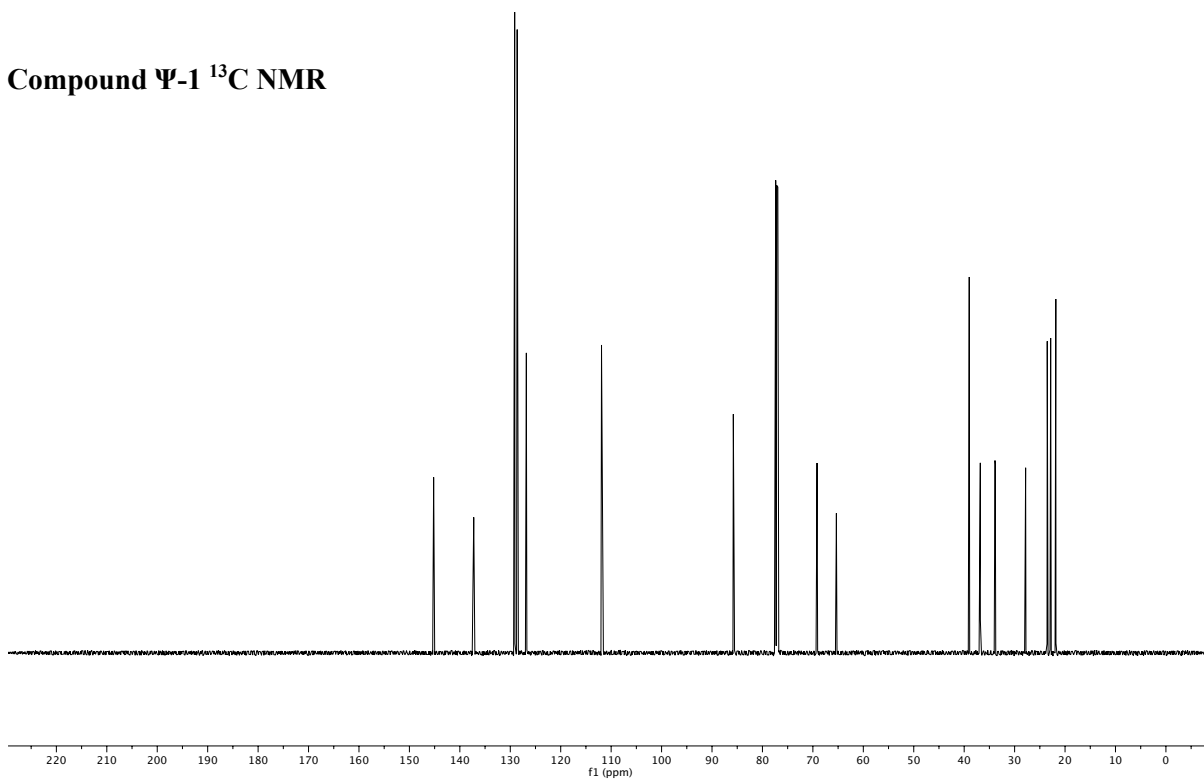

Compound  $\Psi$ -1  $^{31}\text{P}$  NMR

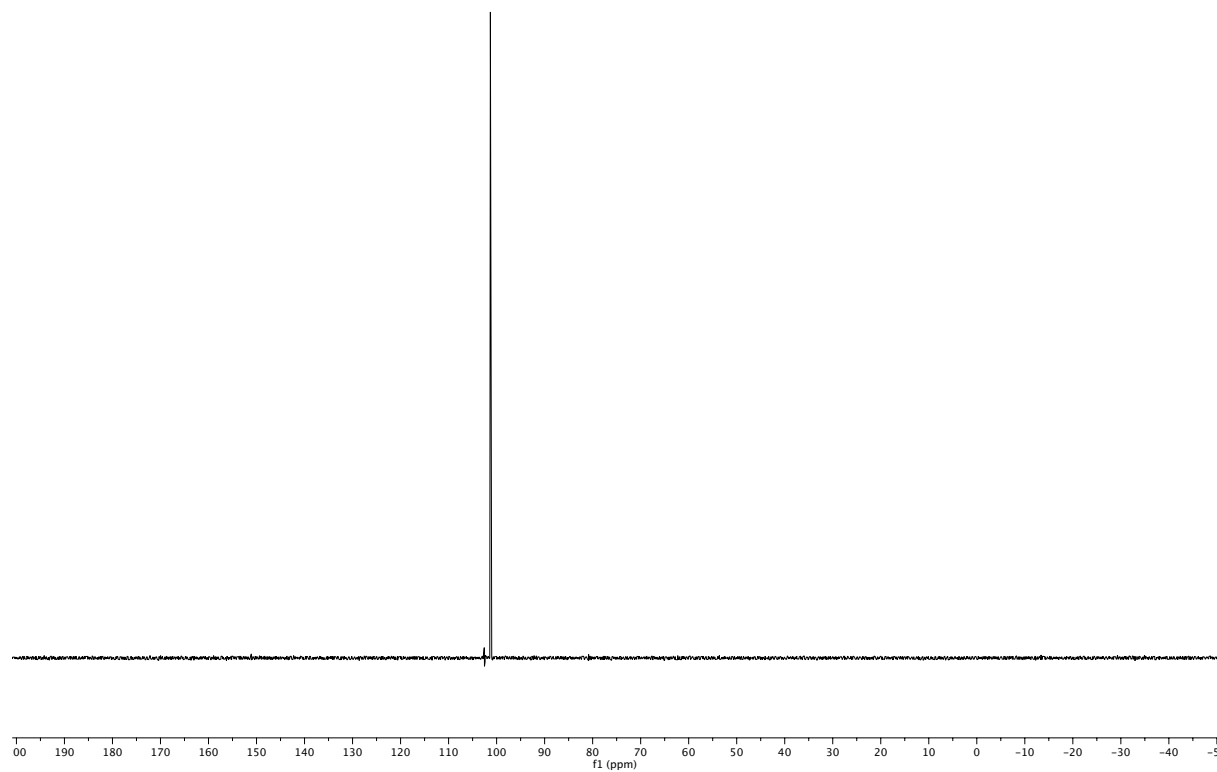

Compound  $\Psi$ -2  $^1\text{H}$  NMR

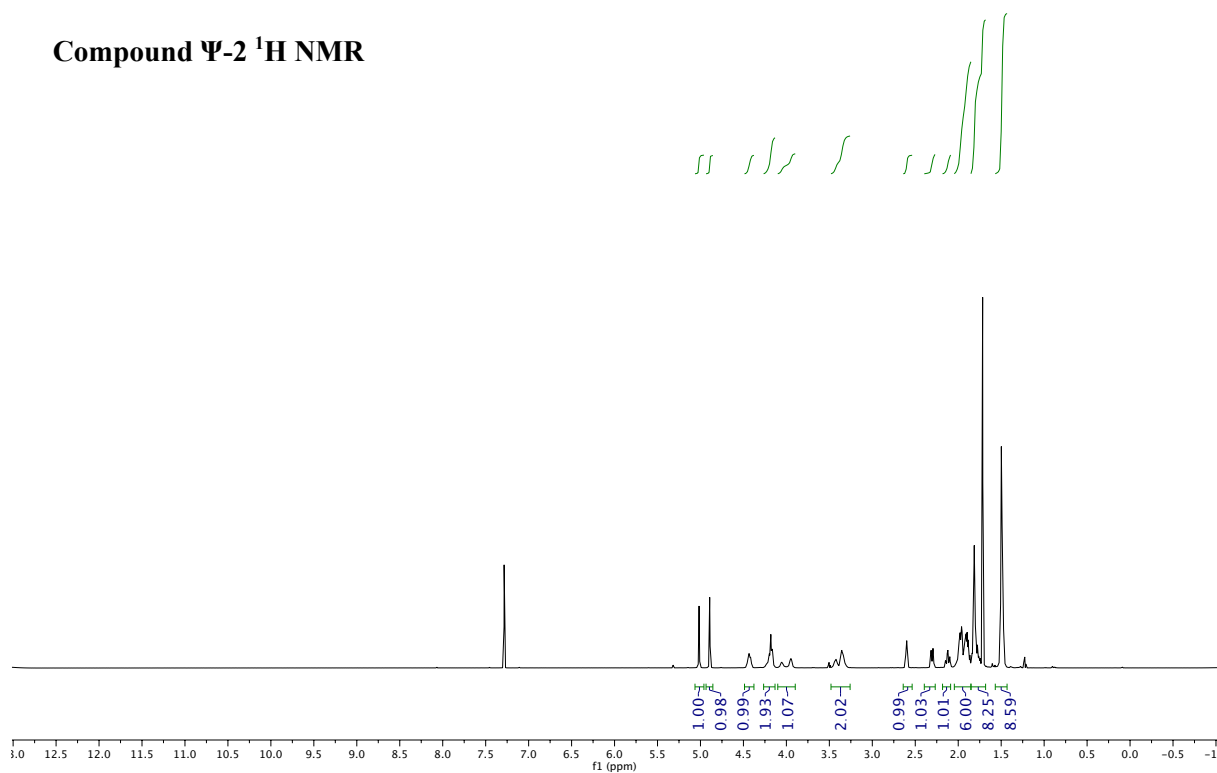

Compound  $\Psi$ -2  $^{13}\text{C}$  NMR

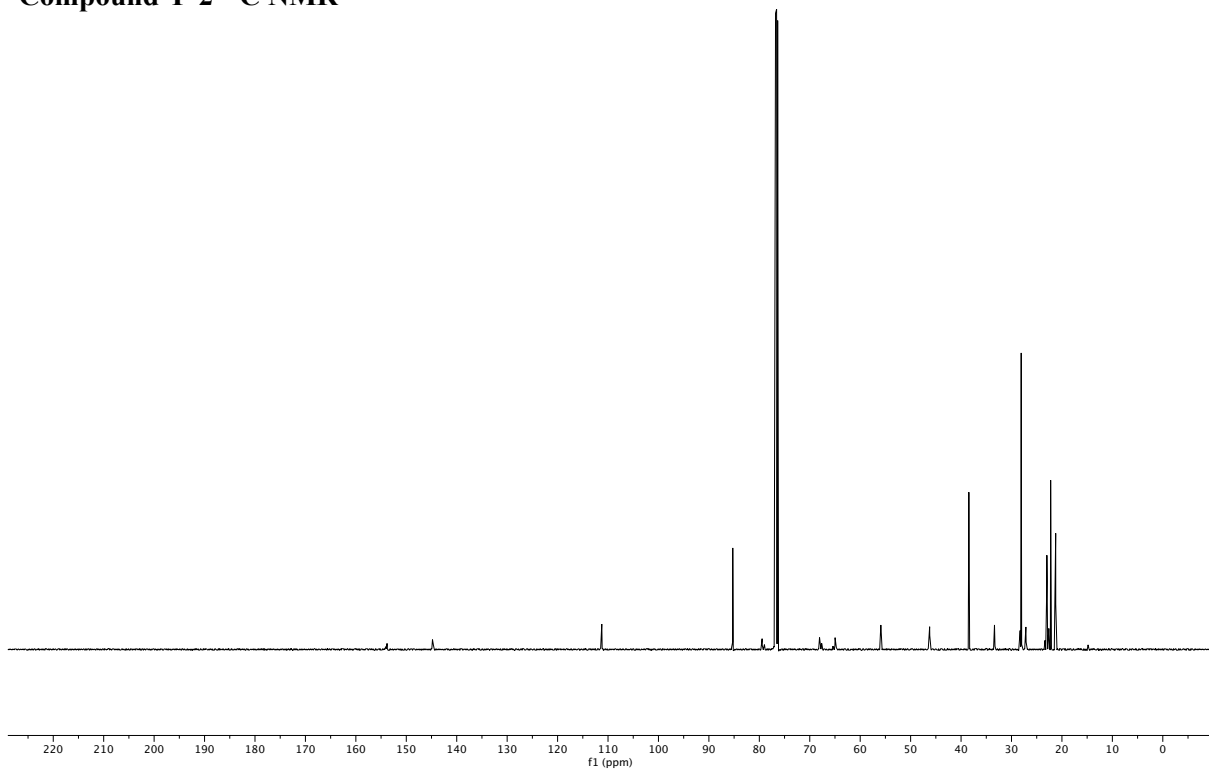

Compound  $\Psi$ -2  $^{31}\text{P}$  NMR

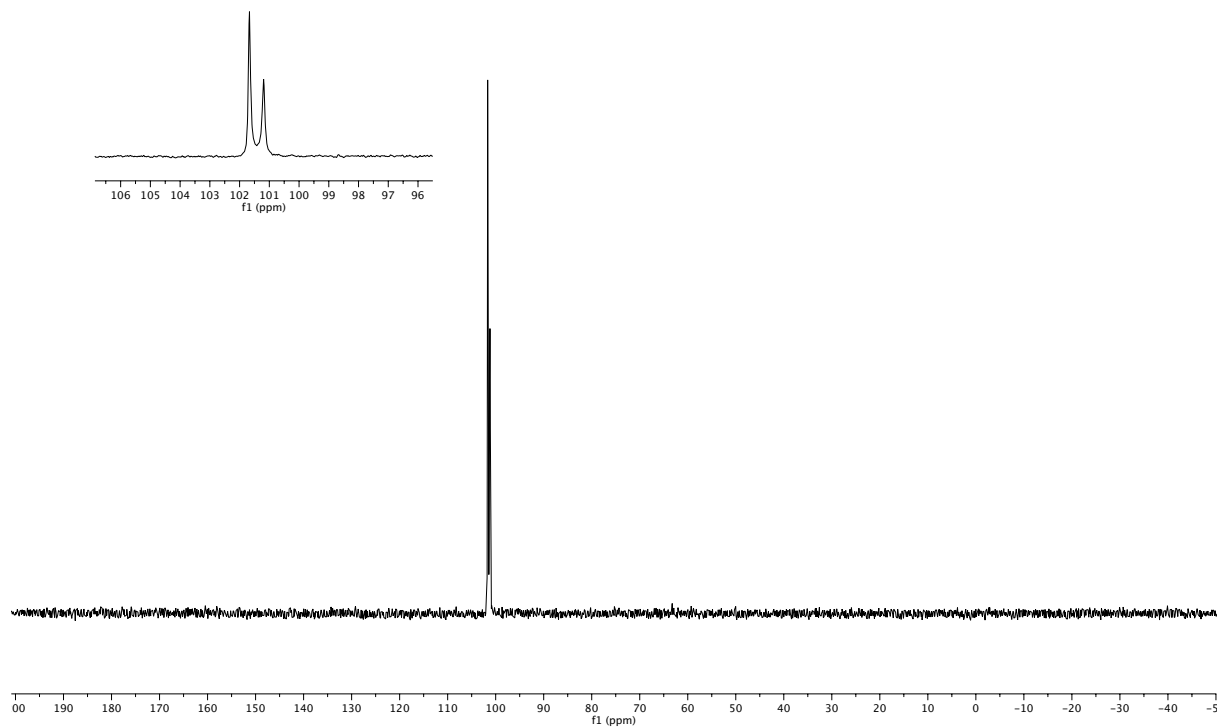

Compound  $\Psi$ -3  $^1\text{H}$  NMR

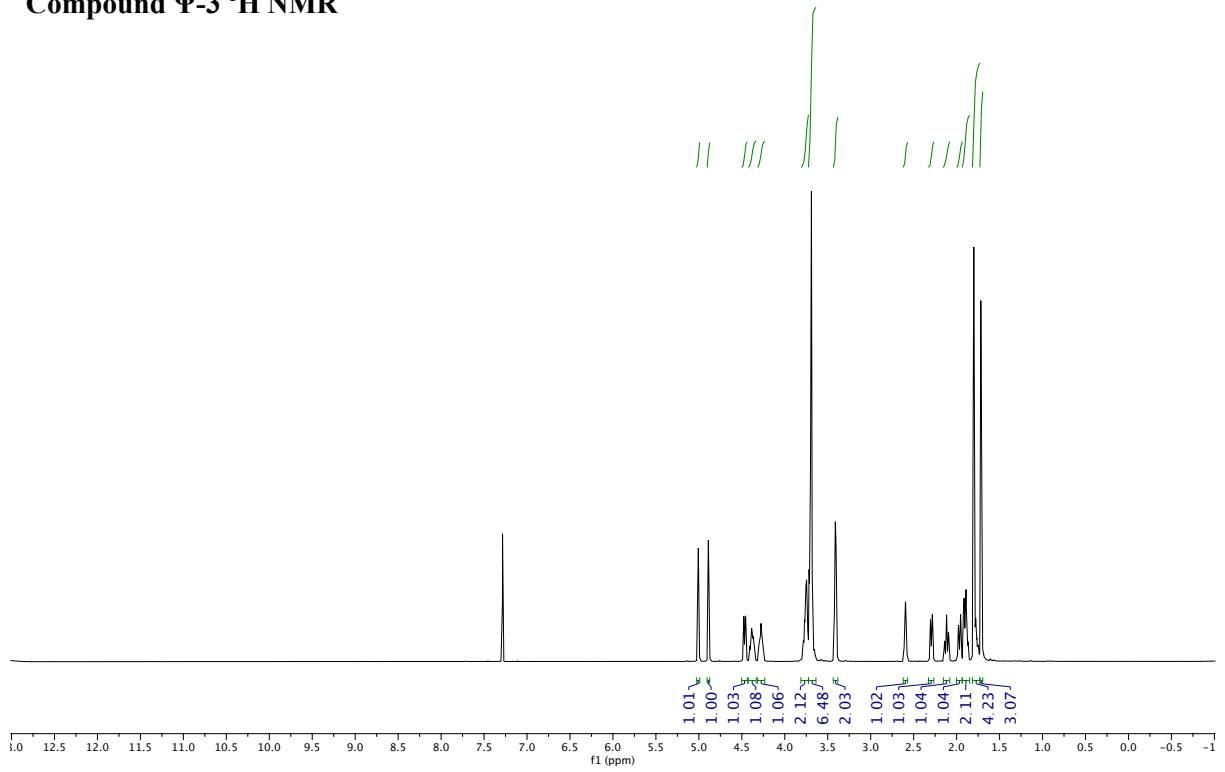

Compound  $\Psi$ -3  $^{13}\text{C}$  NMR

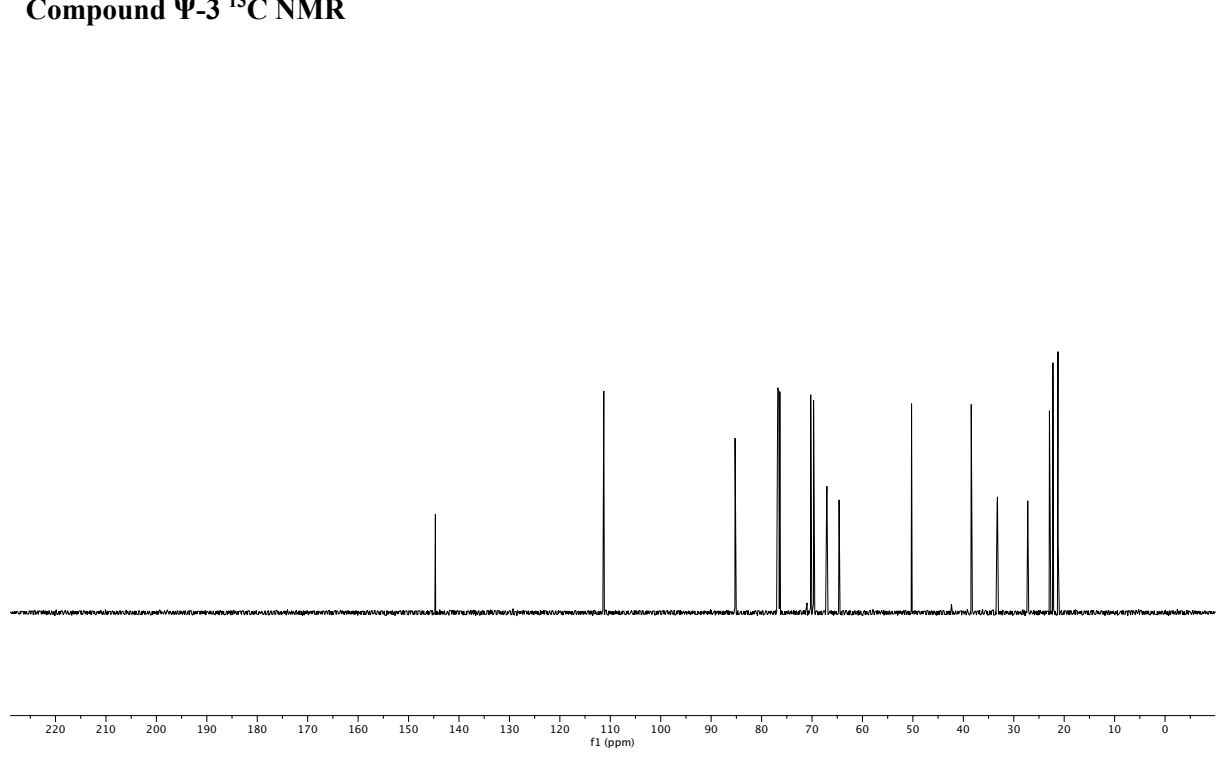

Compound  $\Psi$ -3  $^{31}\text{P}$  NMR

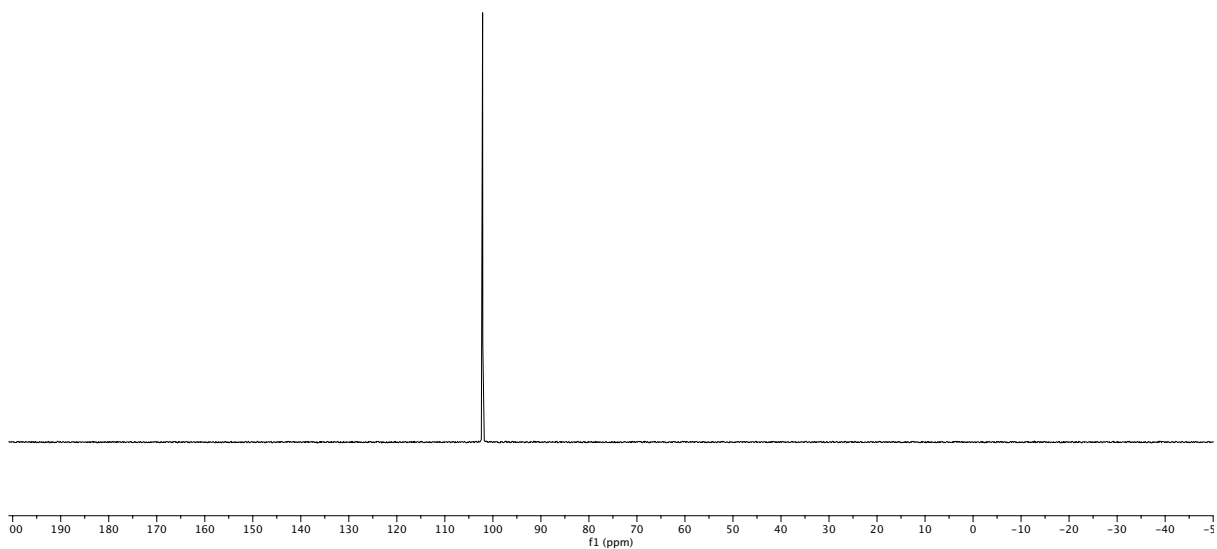

Compound  $\Psi$ -5  $^1\text{H}$  NMR

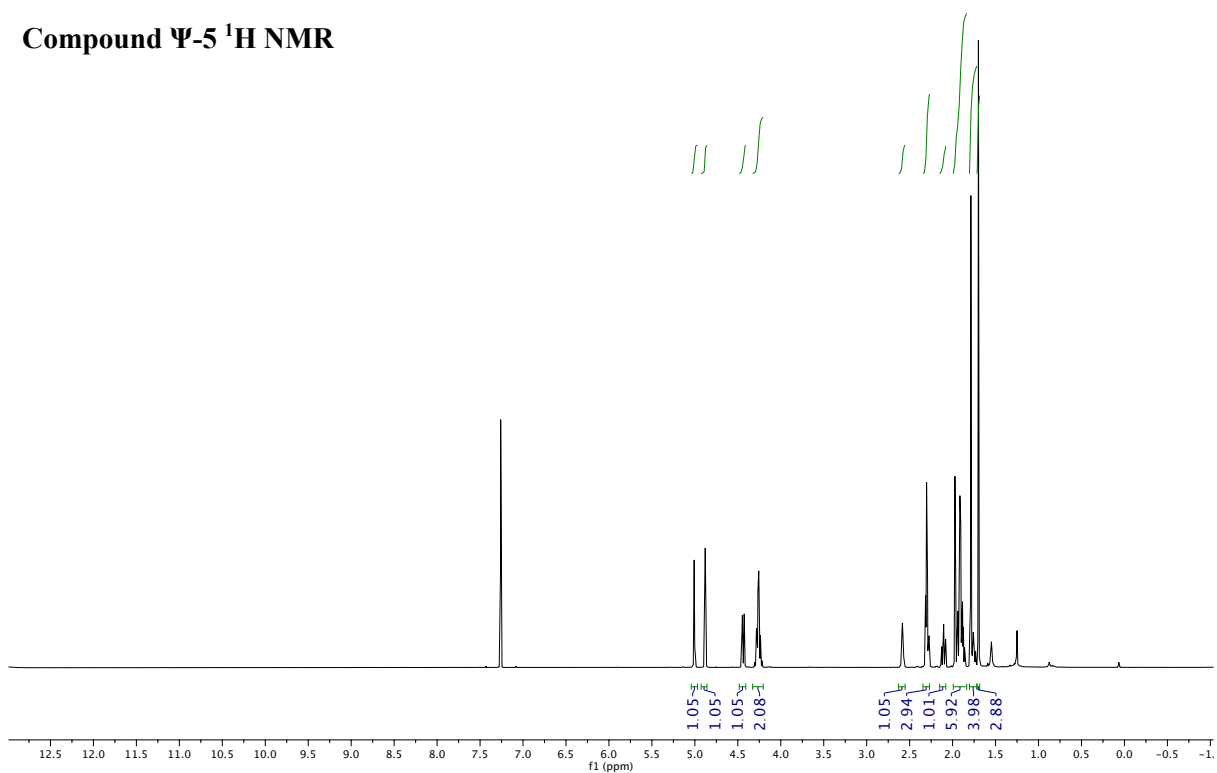

---

---

**Compound Ψ-5 <sup>13</sup>C NMR**

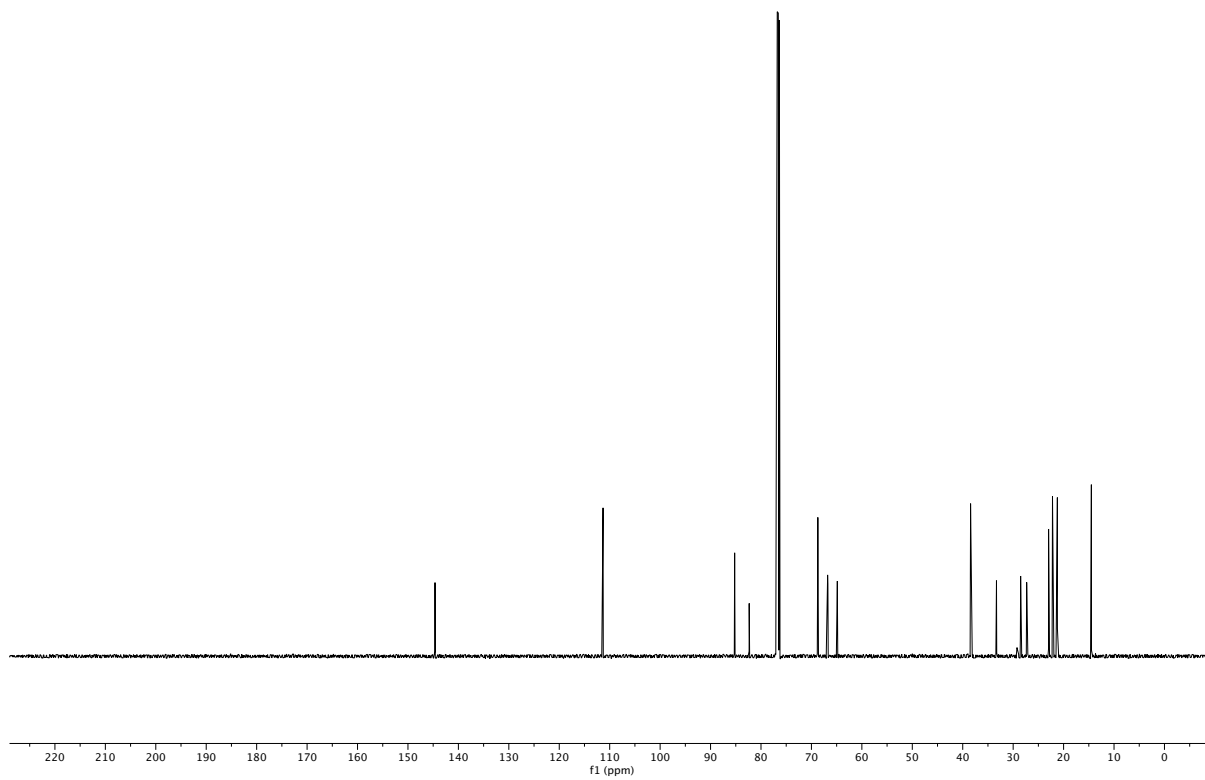

**Compound Ψ-5 <sup>31</sup>P NMR**

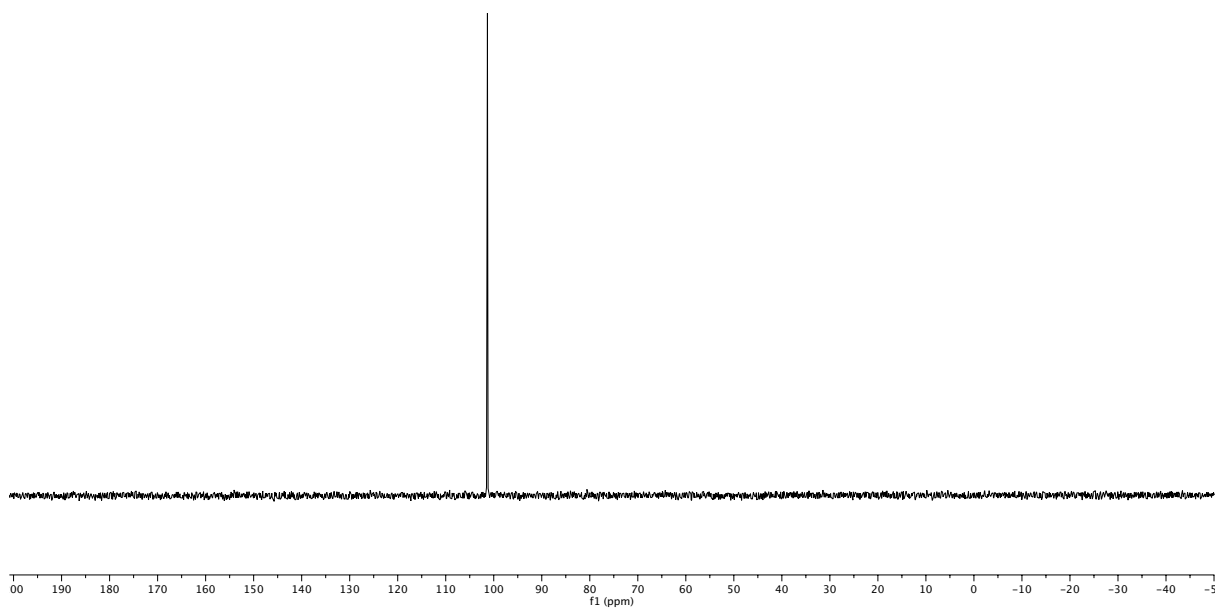



### Compound $\Psi$ -6 $^1\text{H}$ NMR

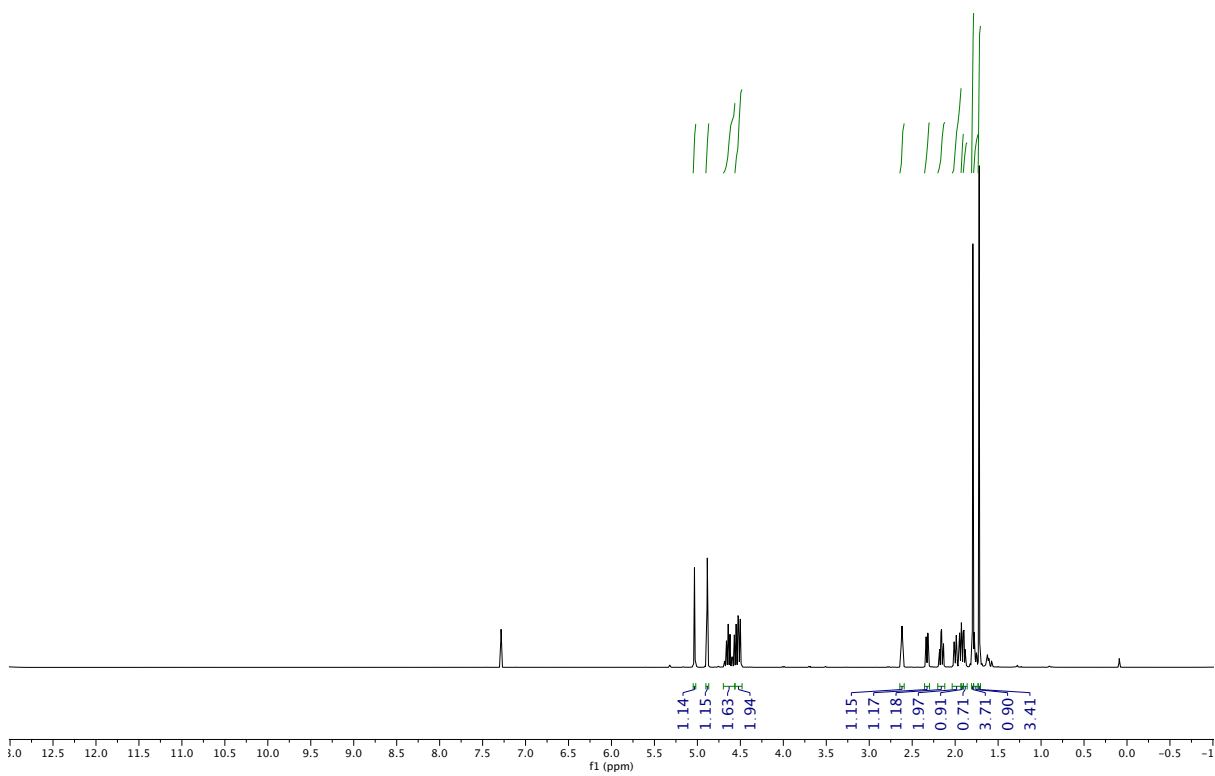

### Compound $\Psi$ -6 $^{13}\text{C}$ NMR

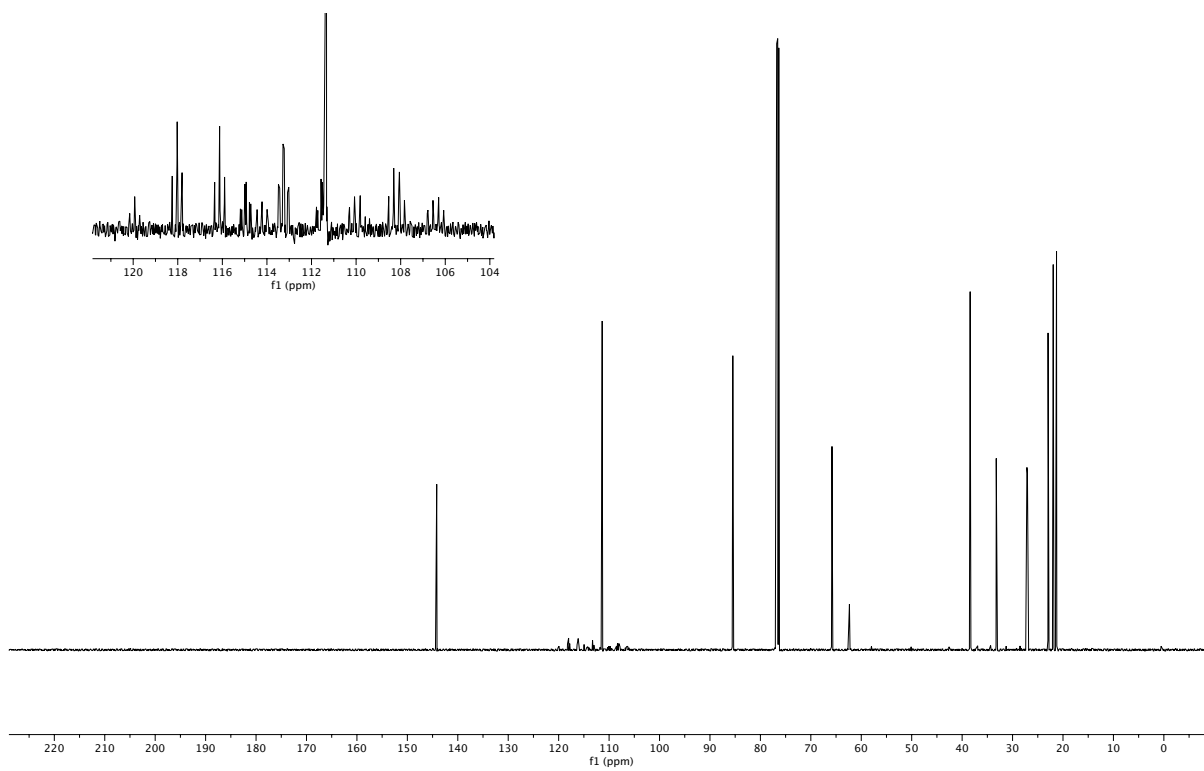

---

---

**Compound  $\Psi$ -6  $^{19}\text{F}$  NMR**

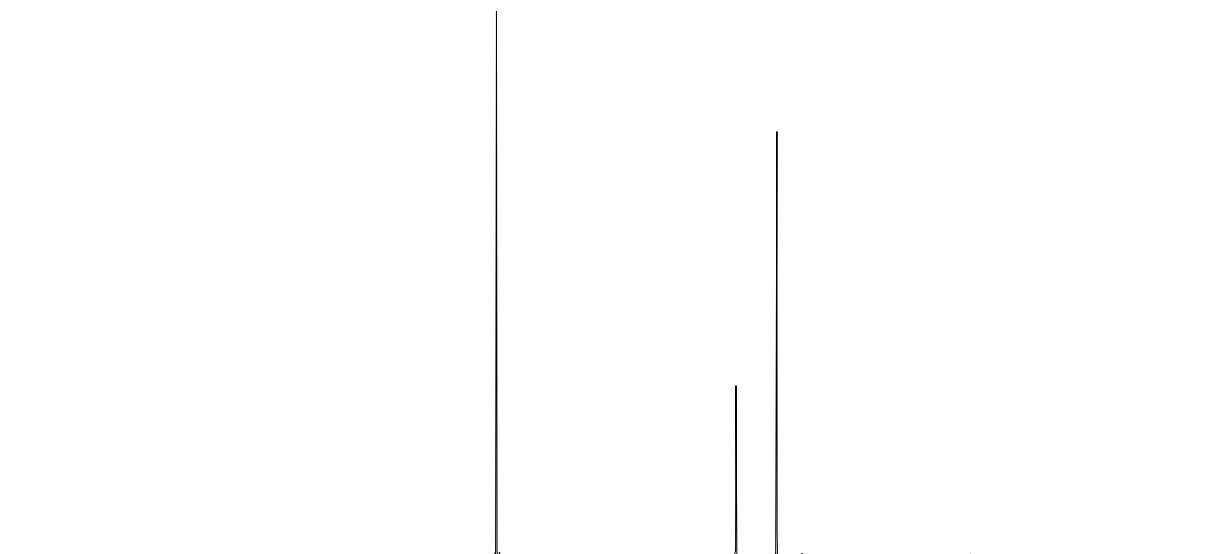

**Compound  $\Psi$ -6  $^{31}\text{P}$  NMR**

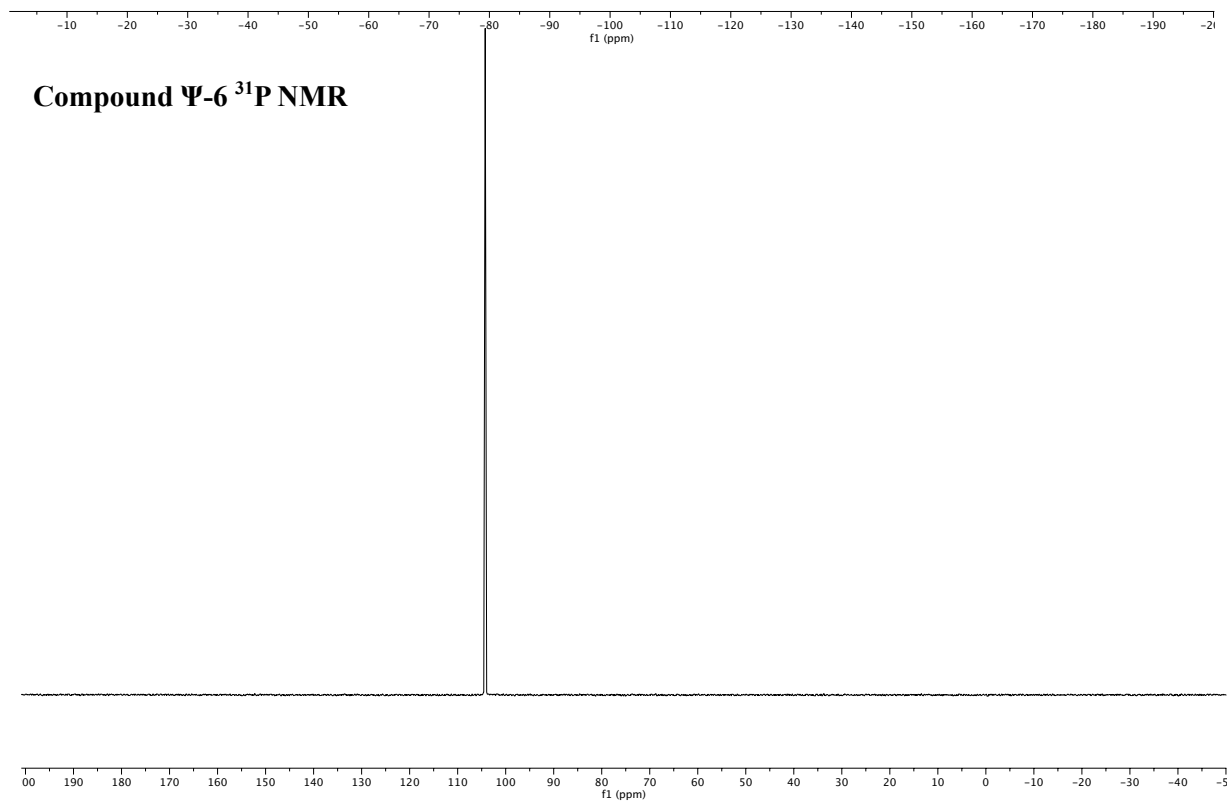

**Compound  $\Psi$ -7  $^1\text{H}$  NMR**

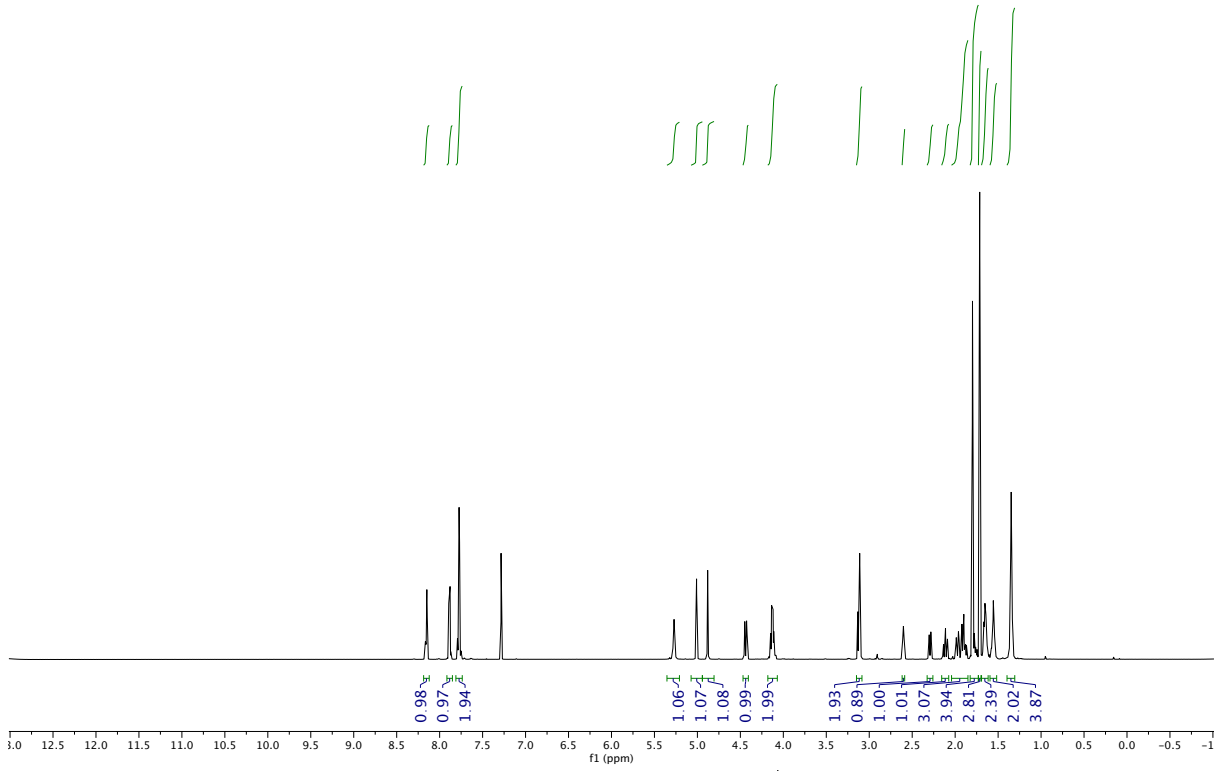

**Compound  $\Psi$ -7  $^{13}\text{C}$  NMR**

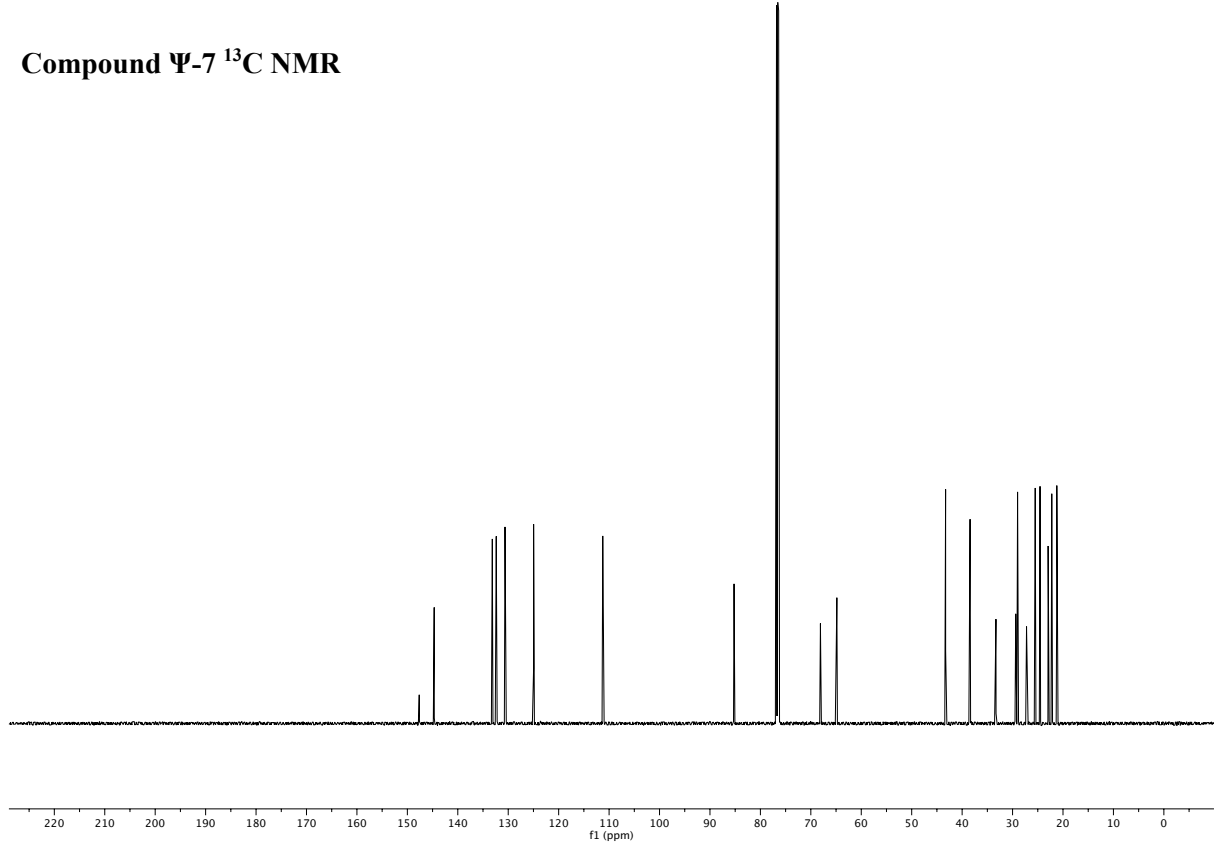

Compound  $\Psi$ -7  $^{31}\text{P}$  NMR

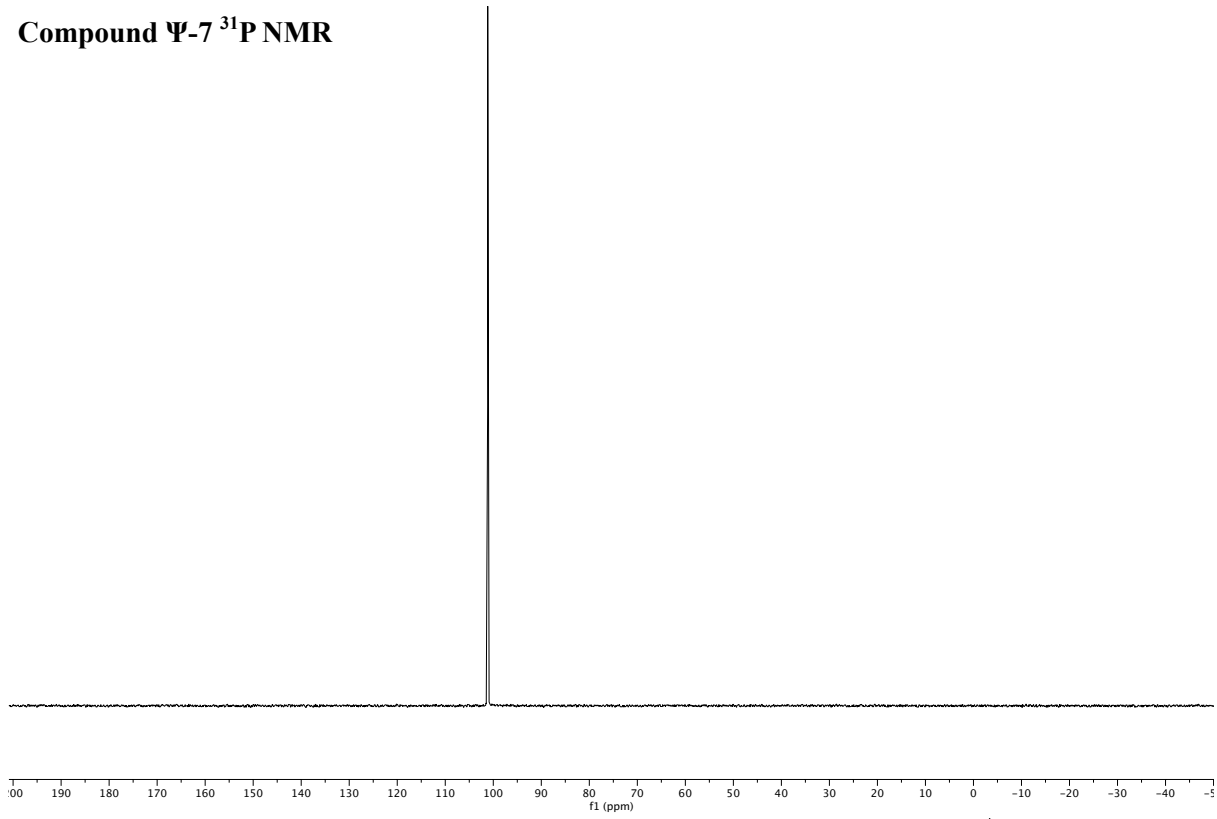

Compound  $\Psi$ -8  $^1\text{H}$  NMR

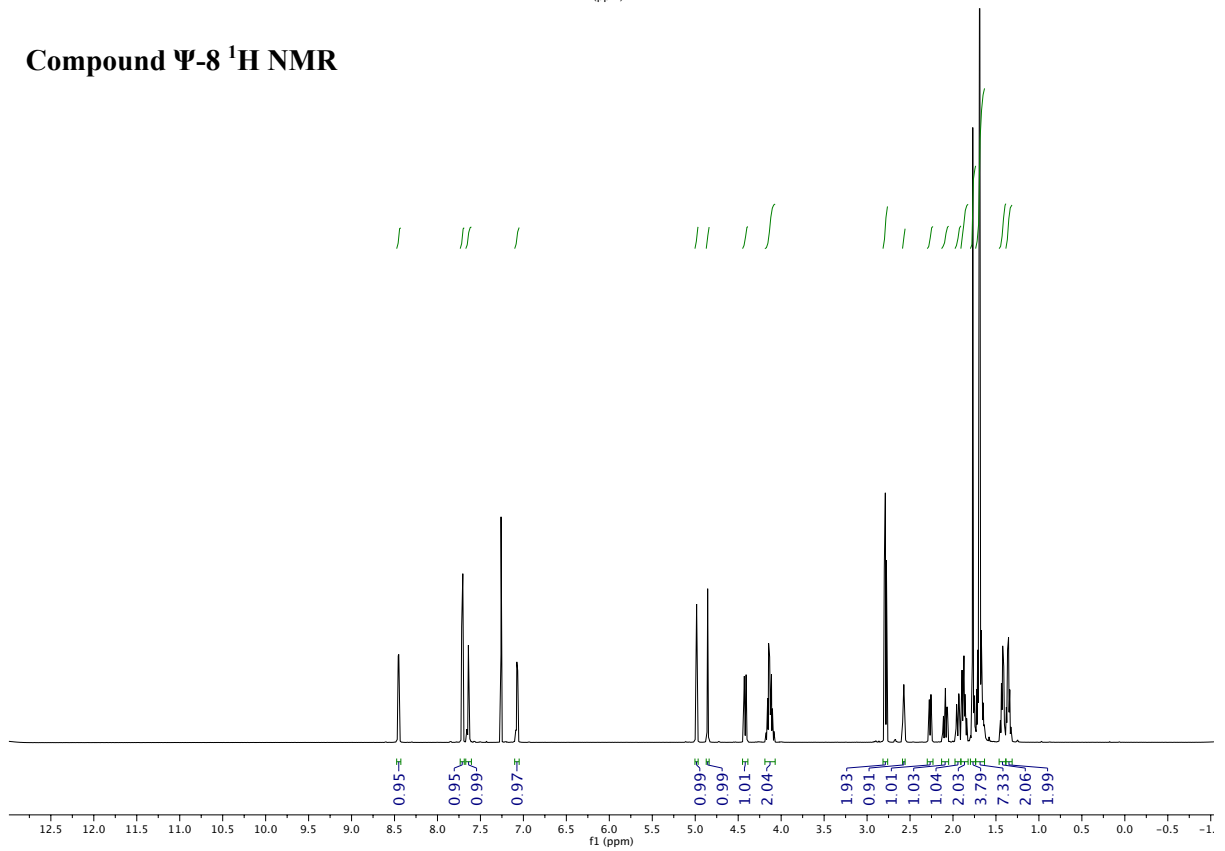

**Compound Ψ-8 <sup>13</sup>C NMR**

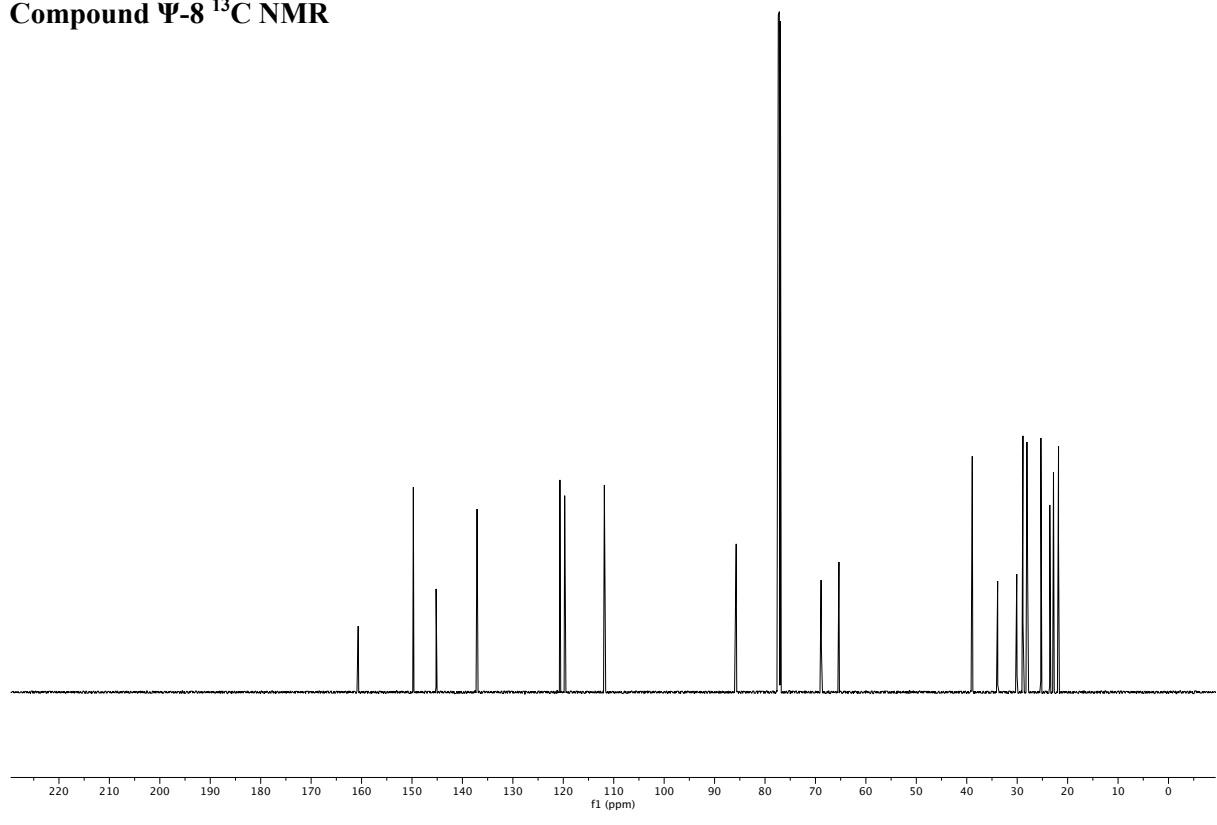

**Compound Ψ-8 <sup>31</sup>P NMR**

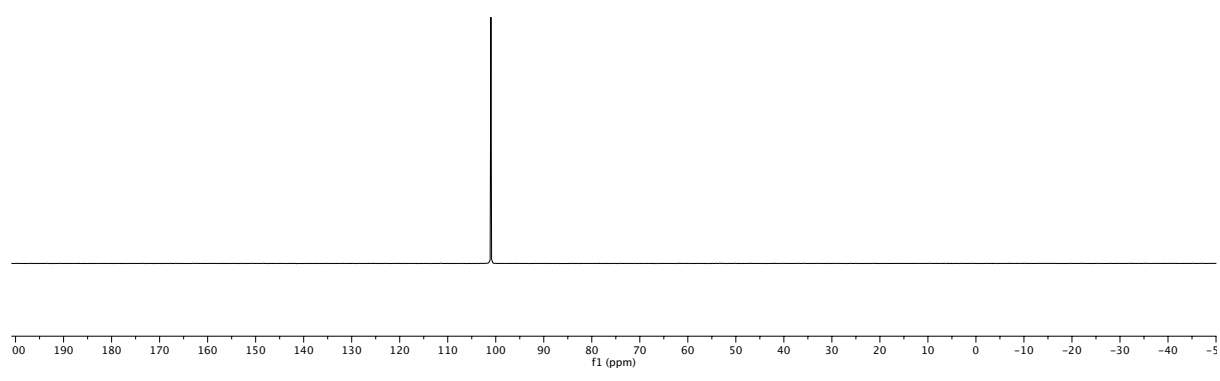

**Compound Ψ-9 <sup>1</sup>H NMR**

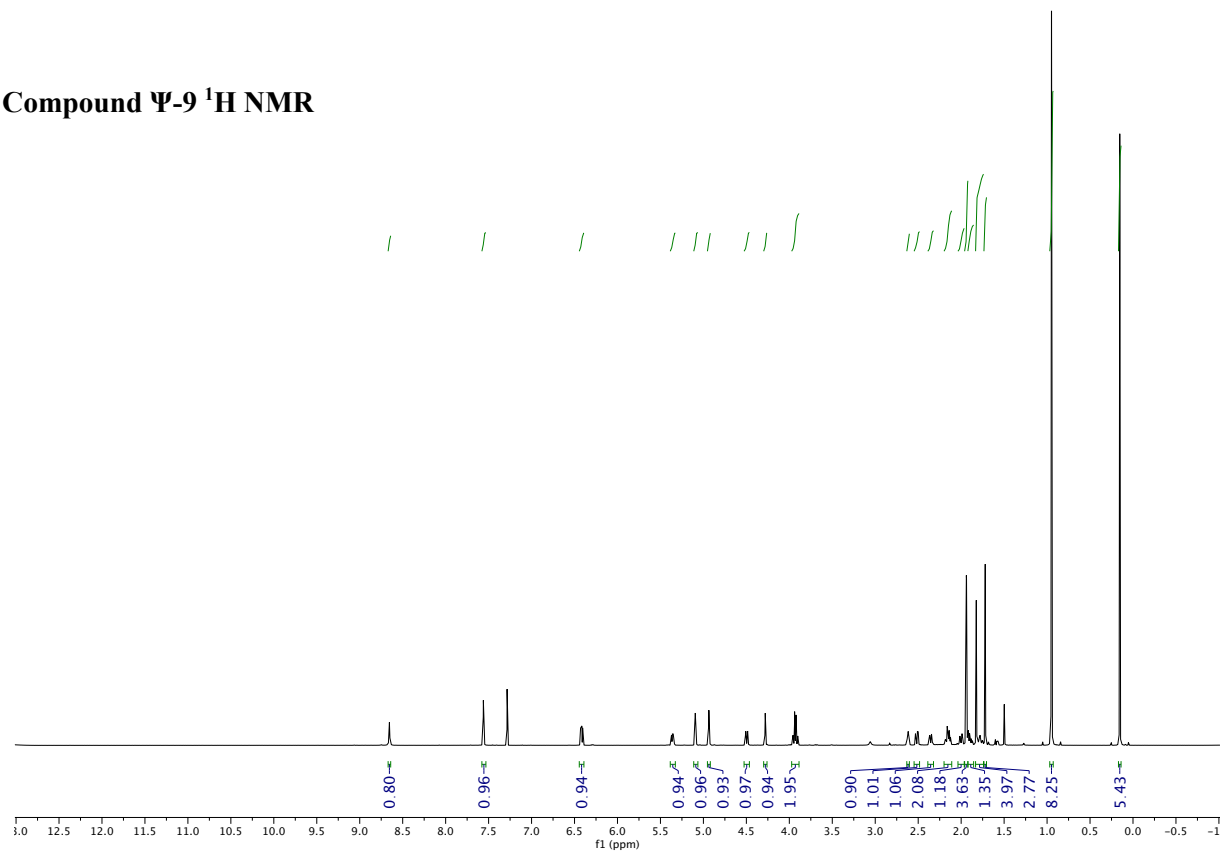

**Compound Ψ-9 <sup>13</sup>C NMR**

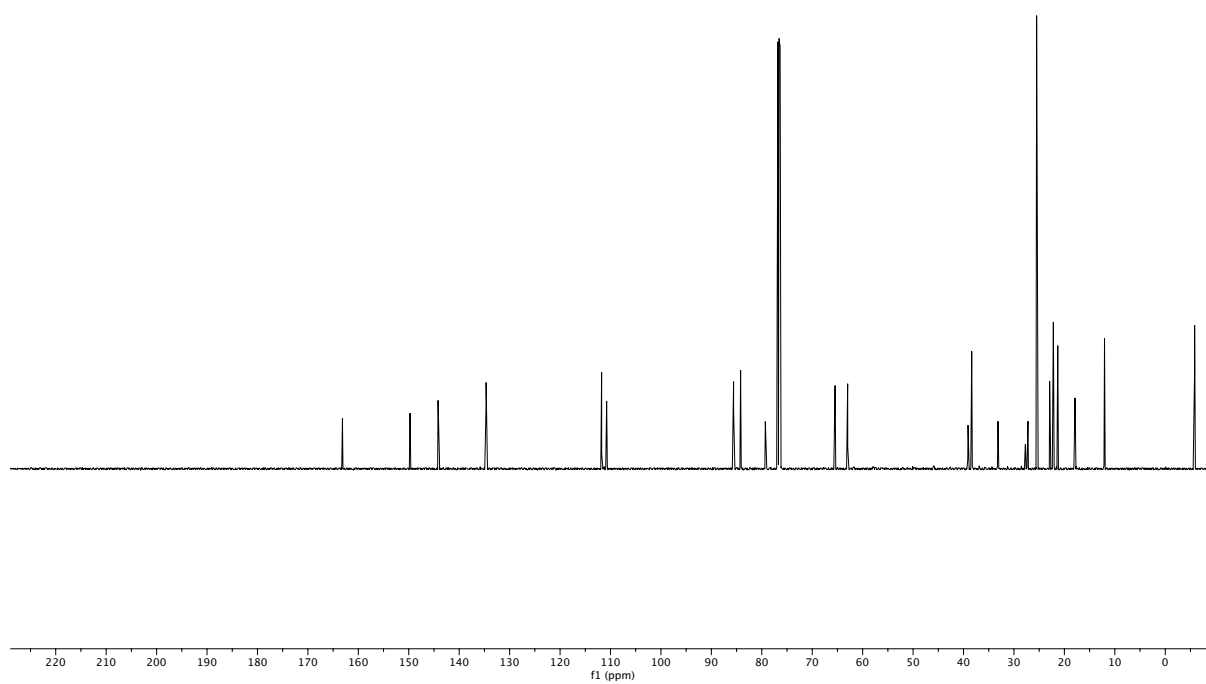

Compound  $\Psi$ -9  $^{31}\text{P}$  NMR

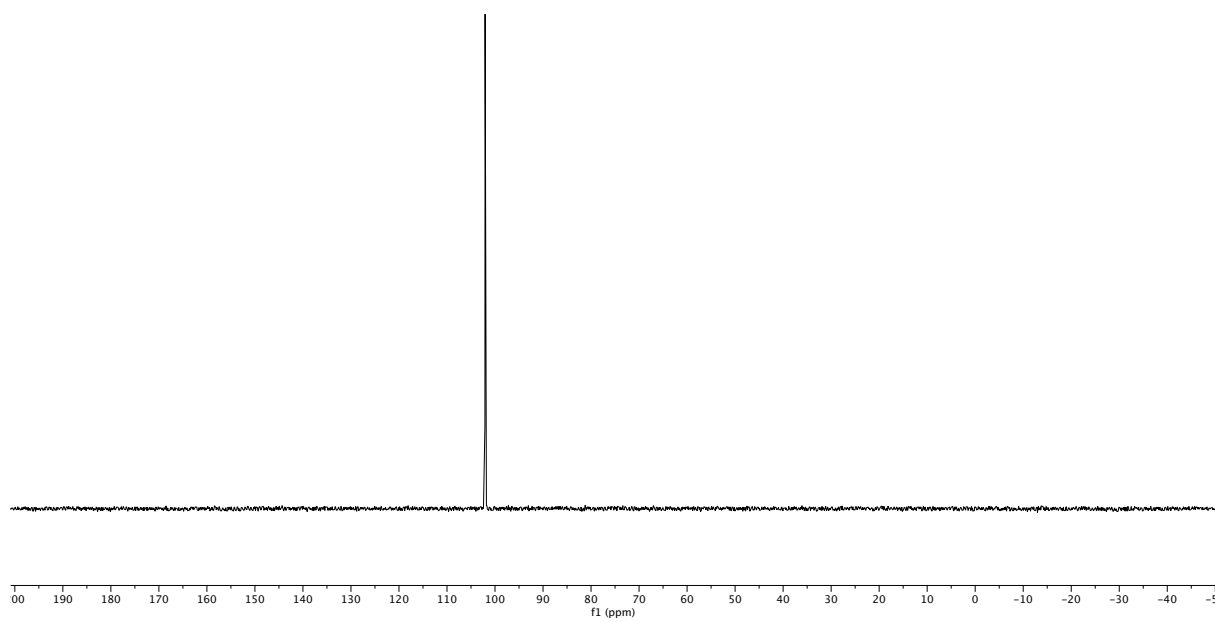

Compound  $\Psi$ -9  $^1\text{H}$  NMR

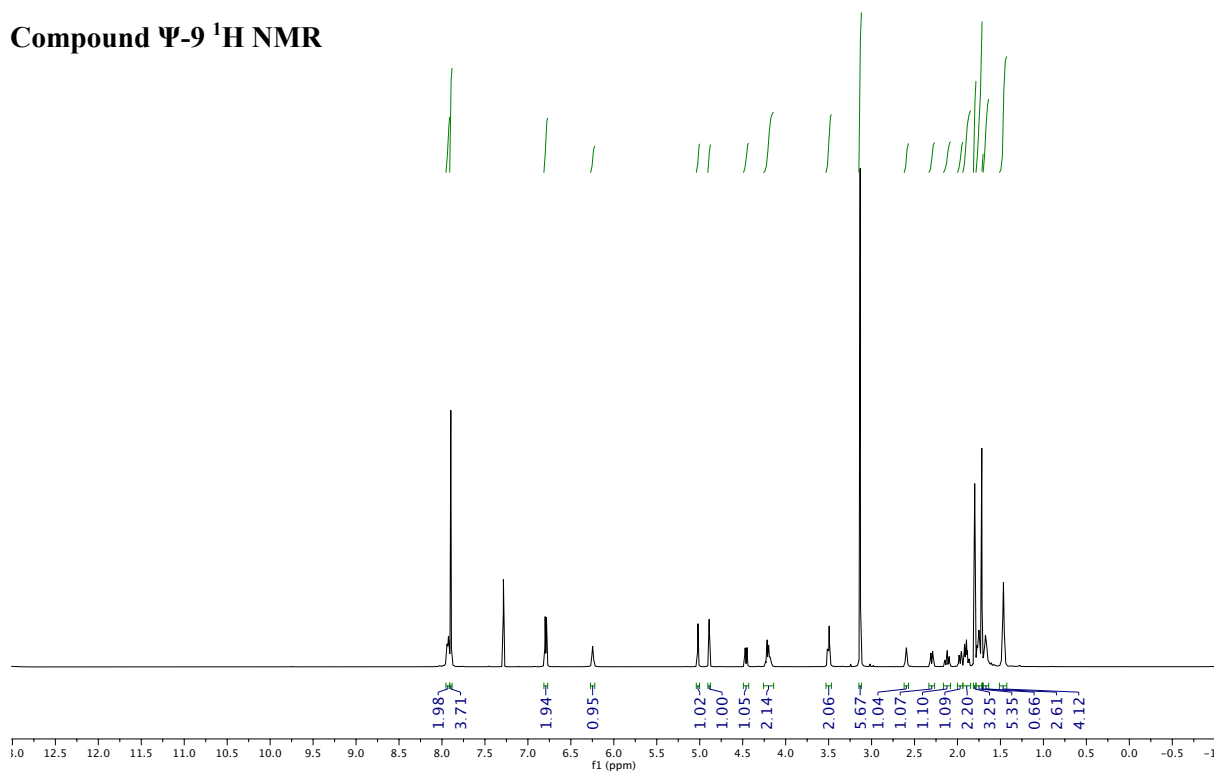

---

---

**Compound Ψ-10  $^{13}\text{C}$  NMR**

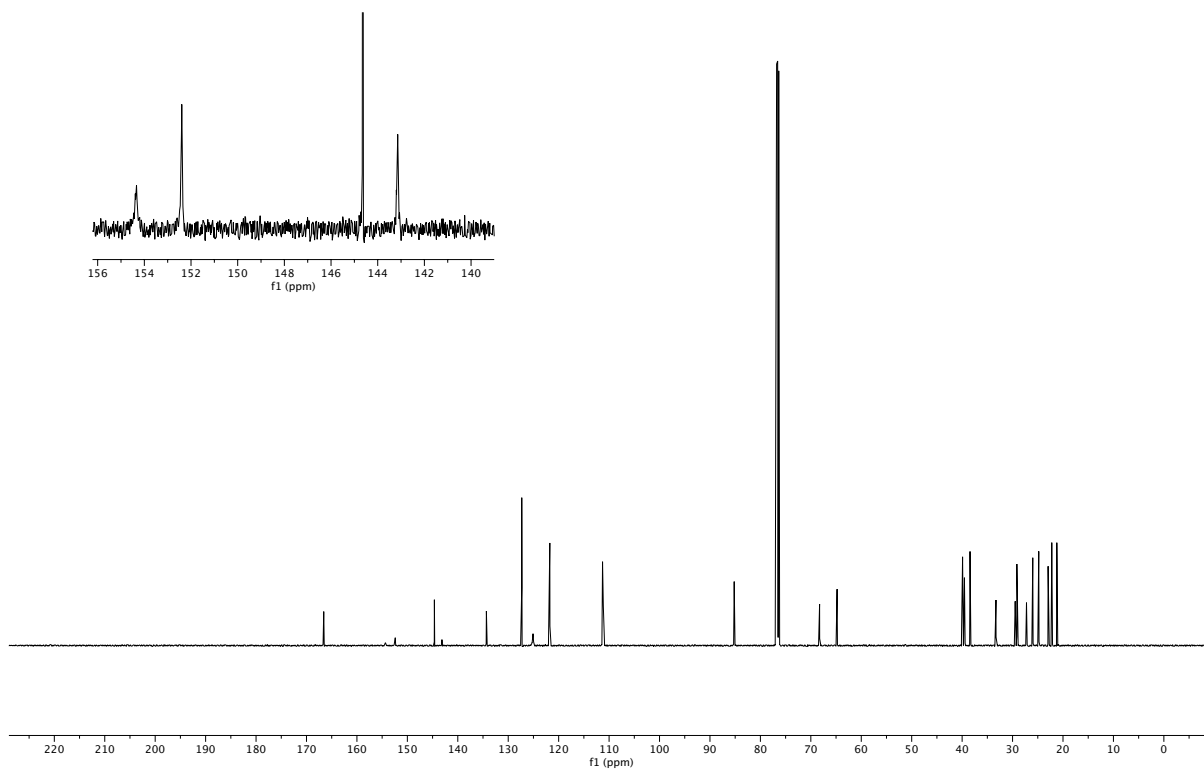

**Compound Ψ-10  $^{31}\text{P}$  NMR**

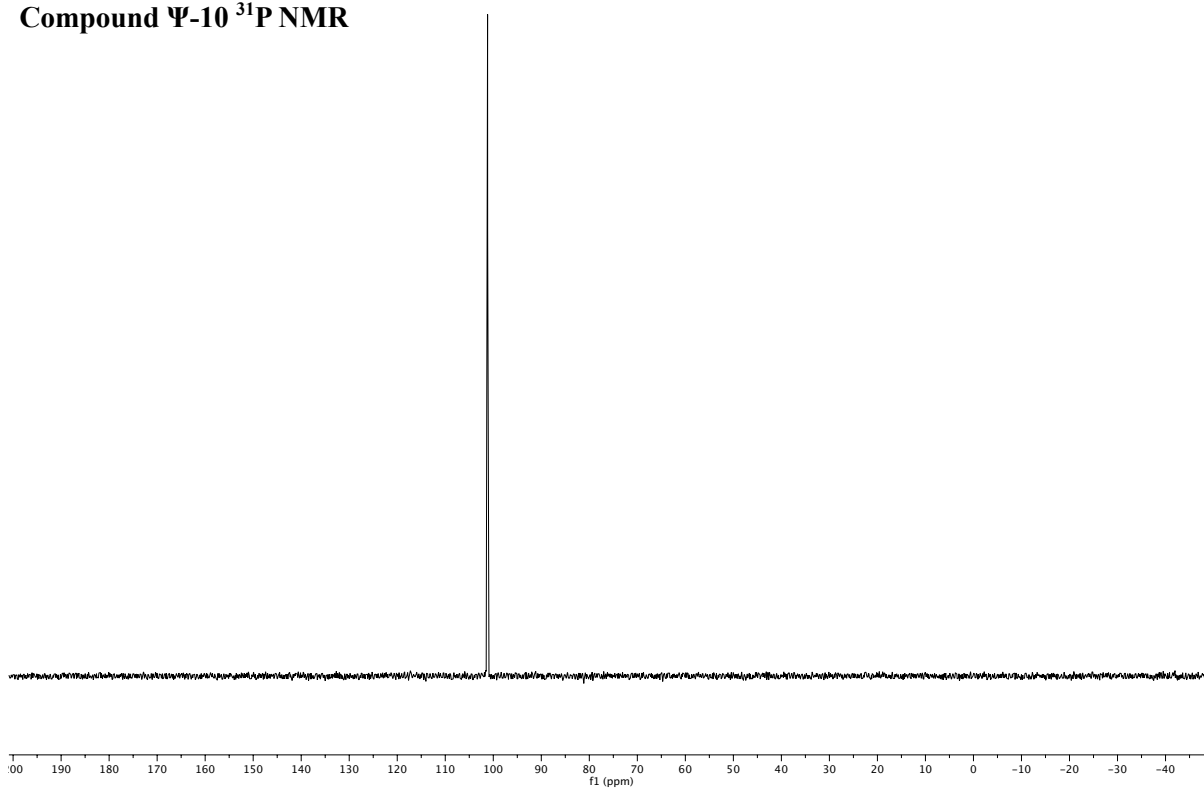



Compound  $\Psi$ -11  $^1\text{H}$  NMR

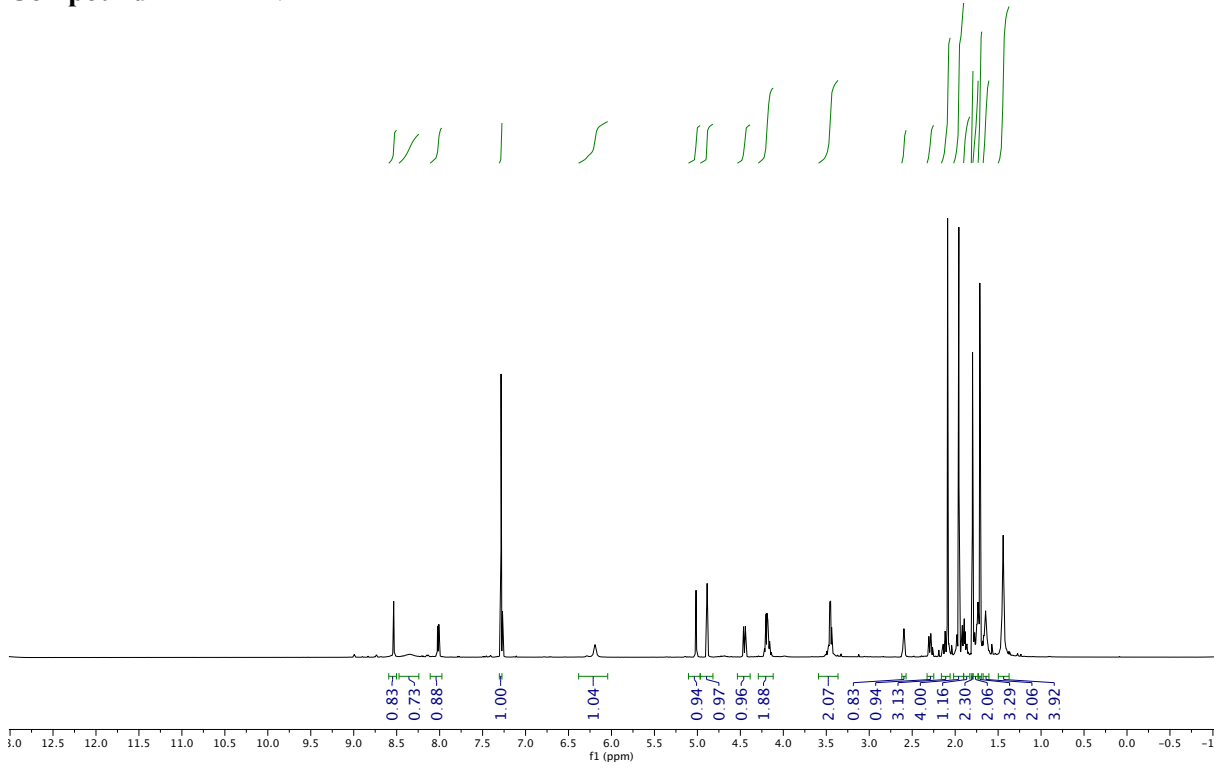

Compound  $\Psi$ -11  $^{13}\text{C}$  NMR

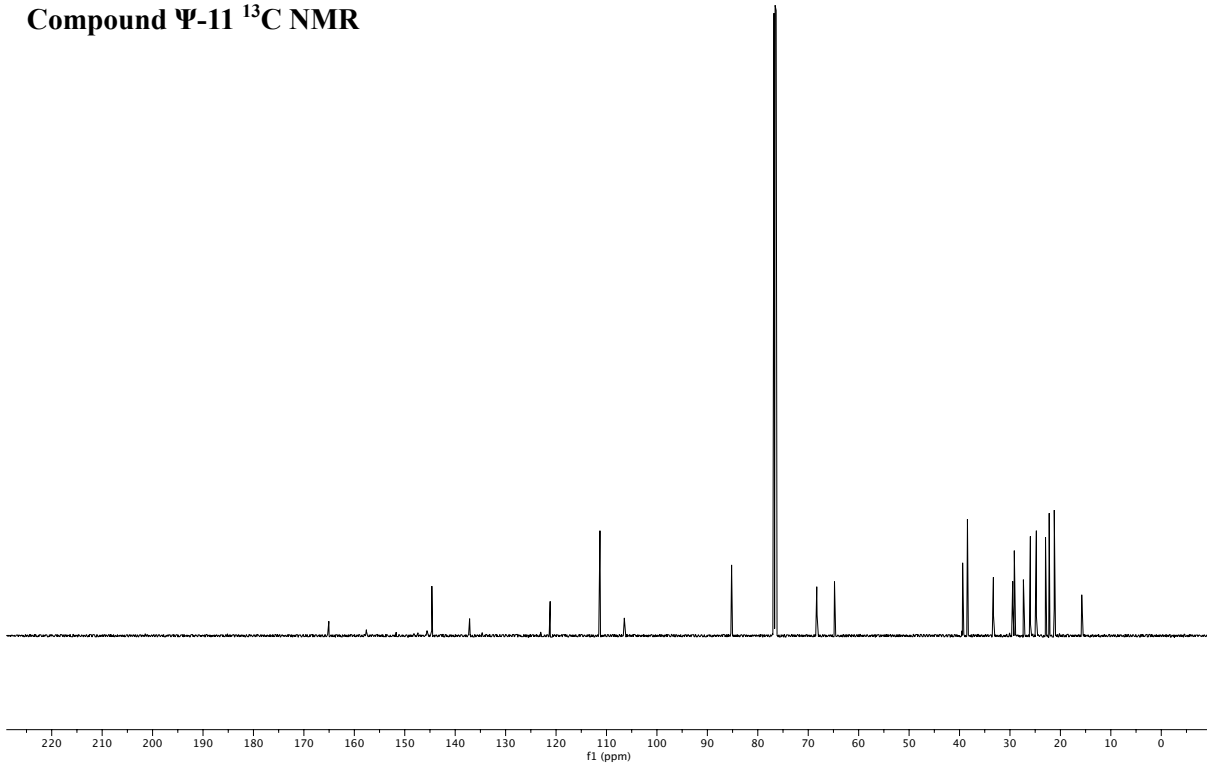

Compound  $\Psi$ -11  $^{31}\text{P}$  NMR

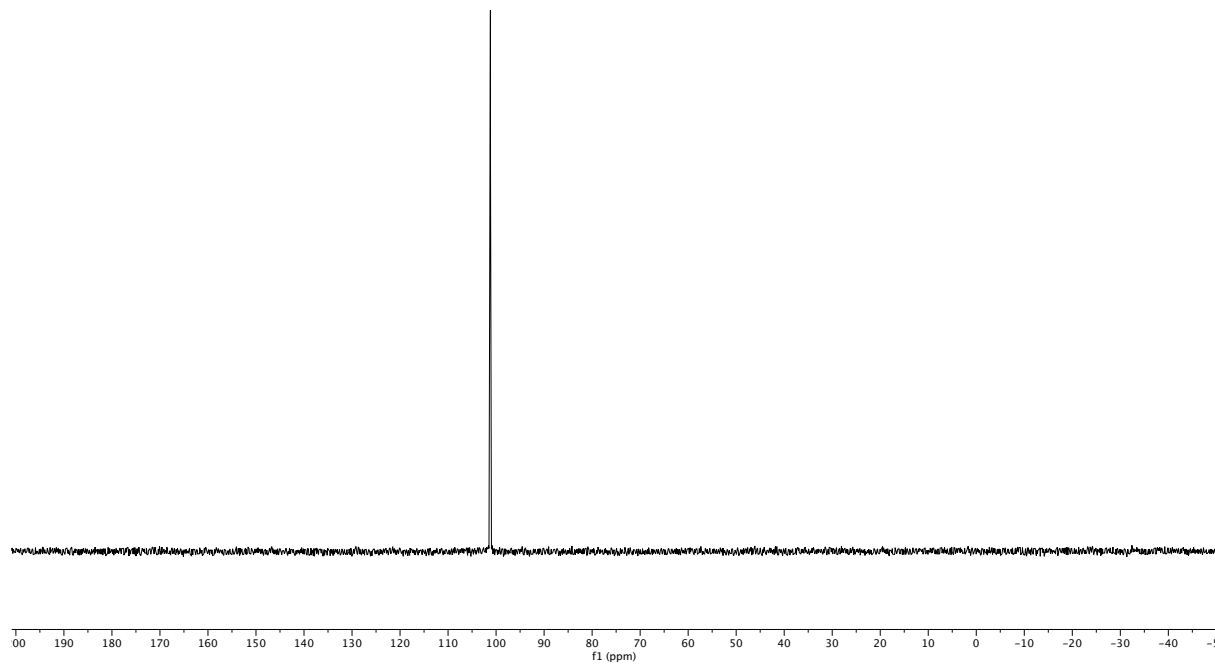

Compound  $\Psi$ -12  $^1\text{H}$  NMR

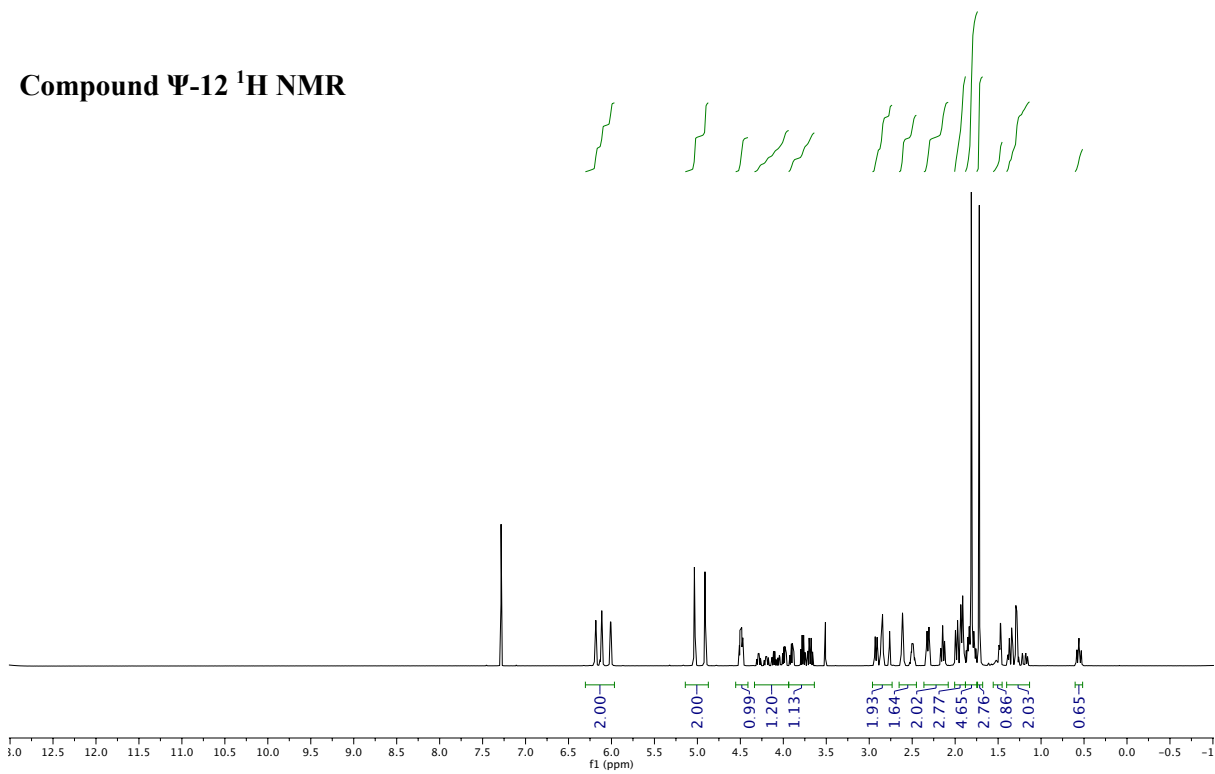

Compound  $\Psi$ -12  $^{13}\text{C}$  NMR

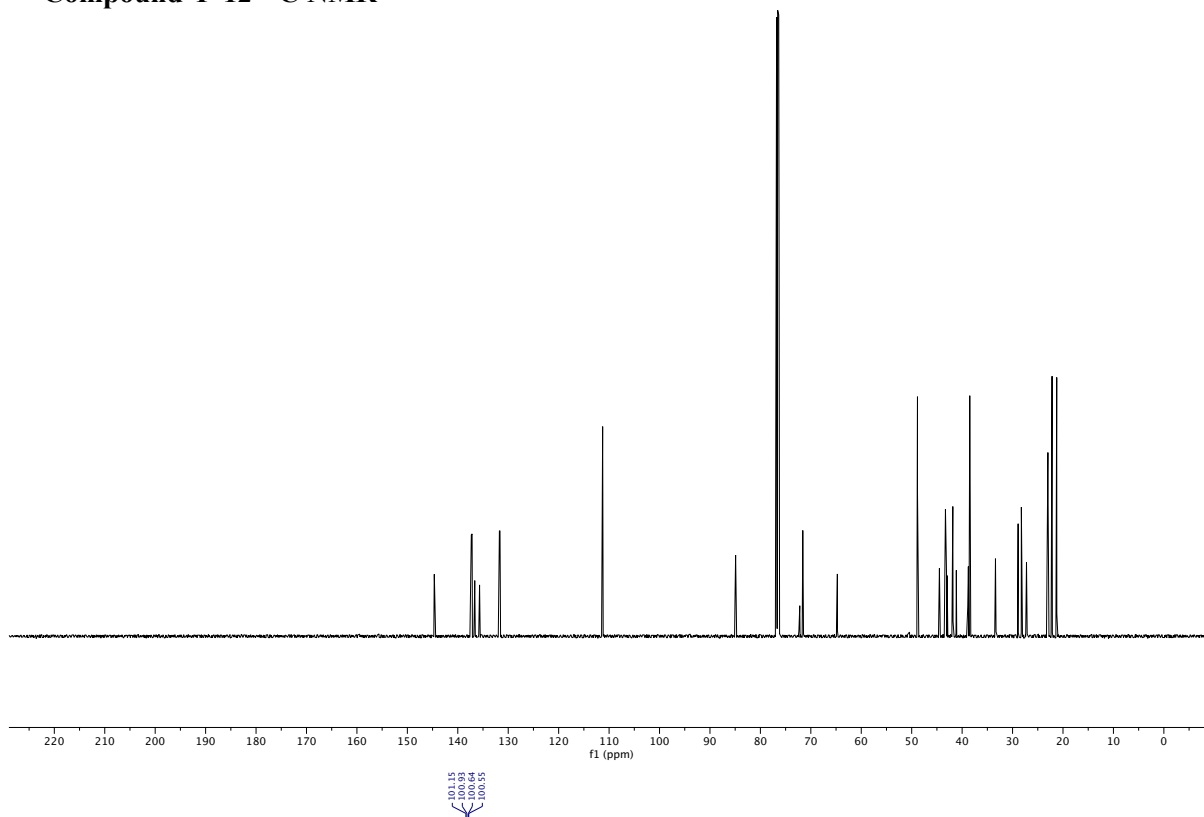

Compound  $\Psi$ -12  $^{31}\text{P}$  NMR

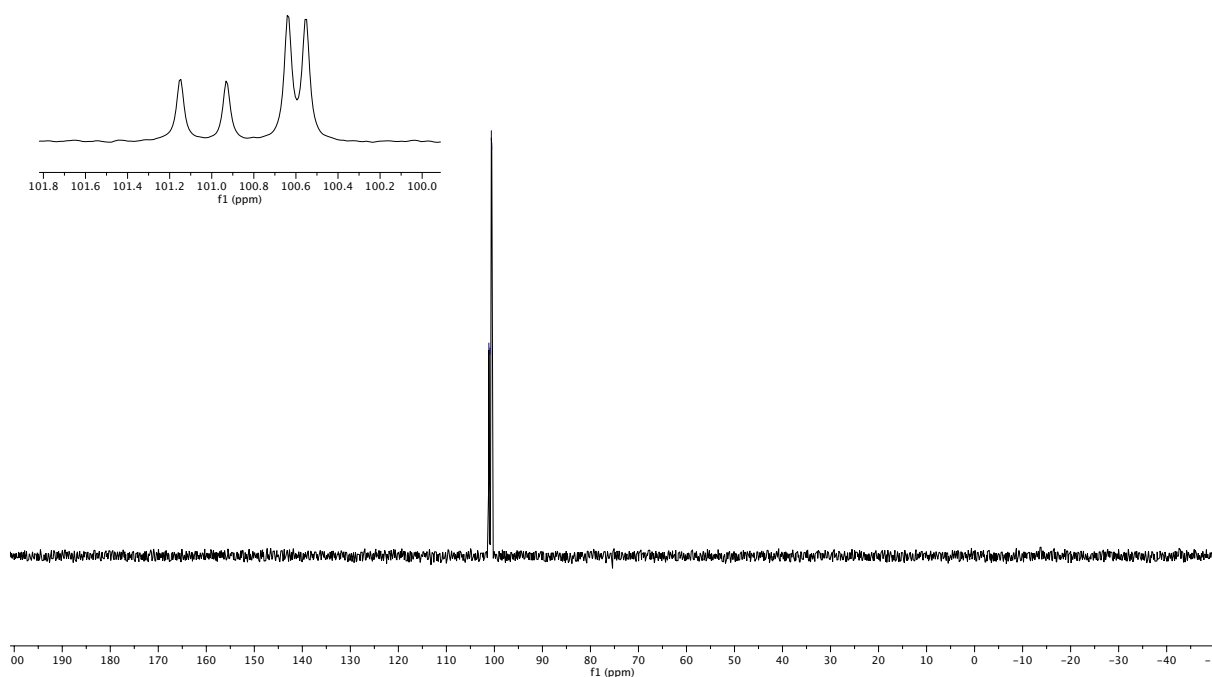

### Compound Ψ-13 <sup>1</sup>H NMR

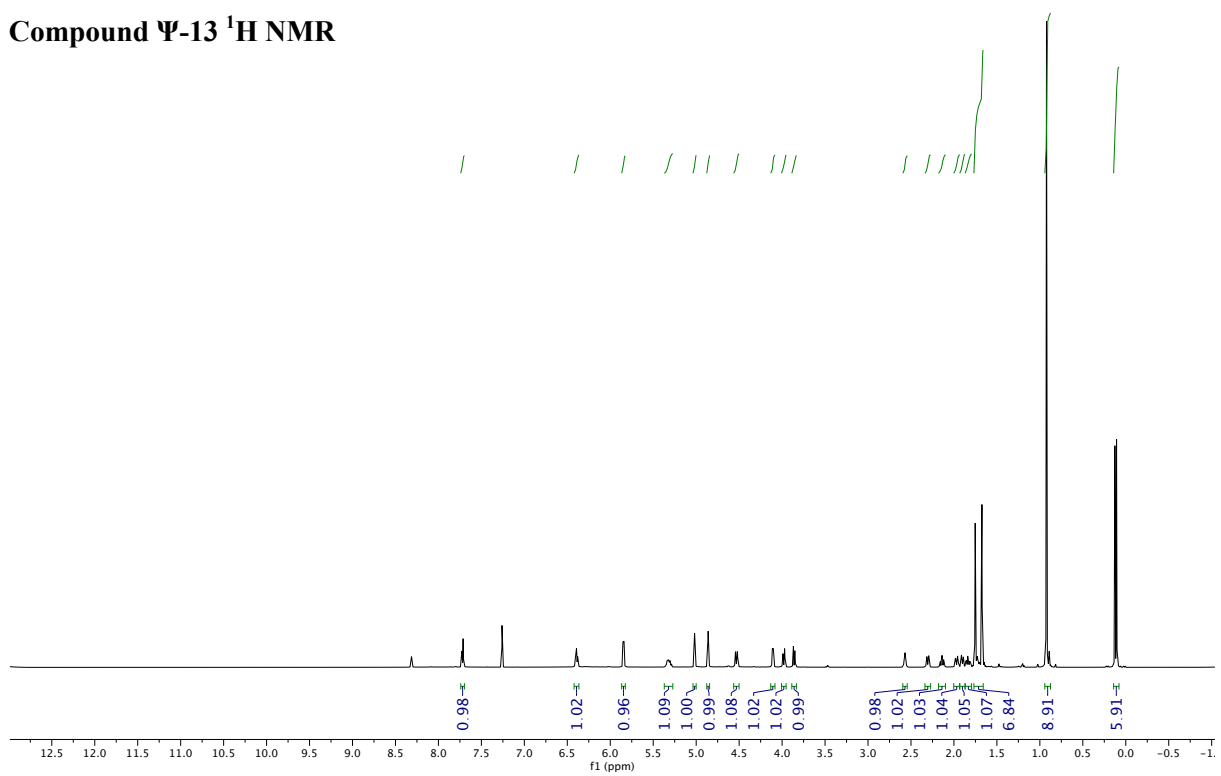

### Compound Ψ-13 <sup>13</sup>C NMR

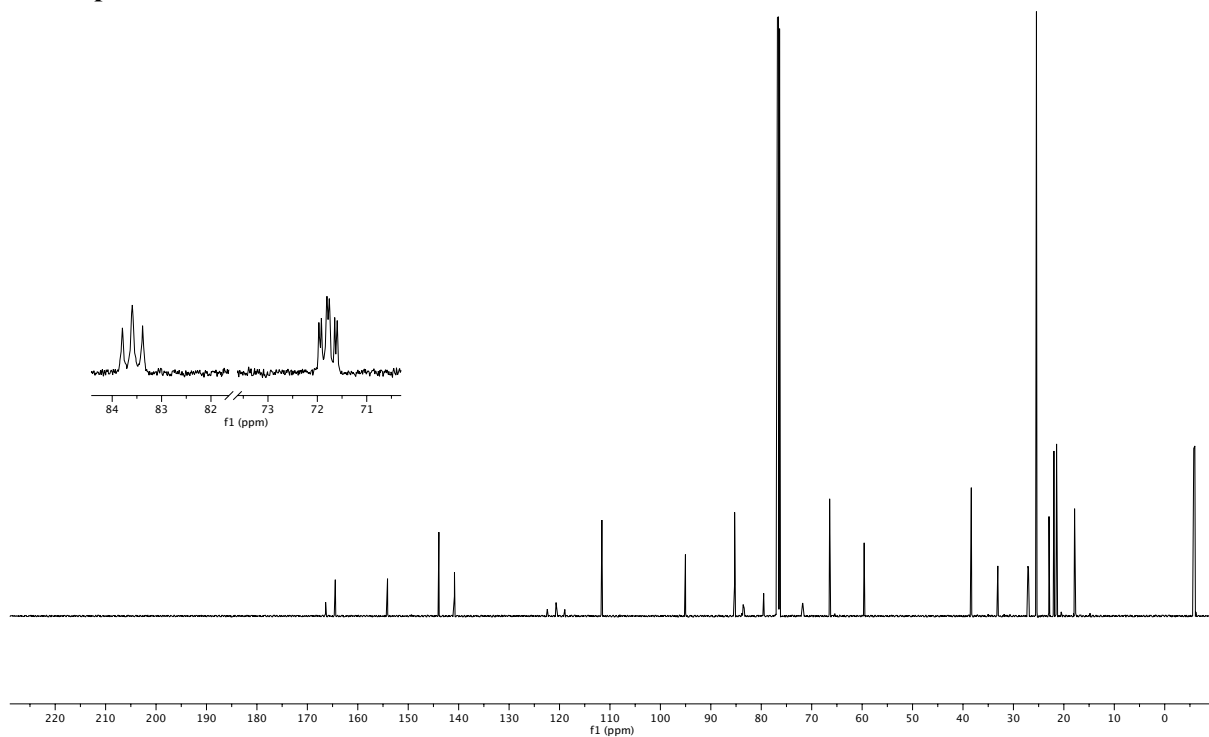

---

---

**Compound  $\Psi$ -13  $^{19}\text{F}$  NMR**

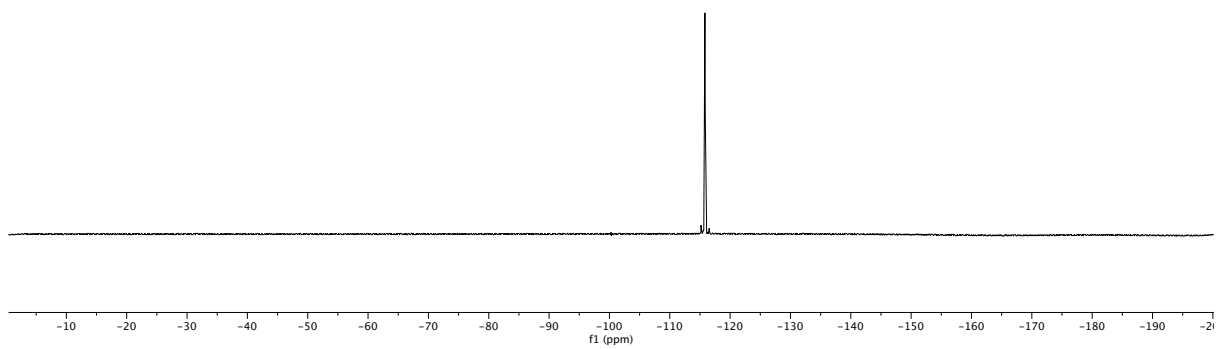

**Compound  $\Psi$ -13  $^{31}\text{P}$  NMR**

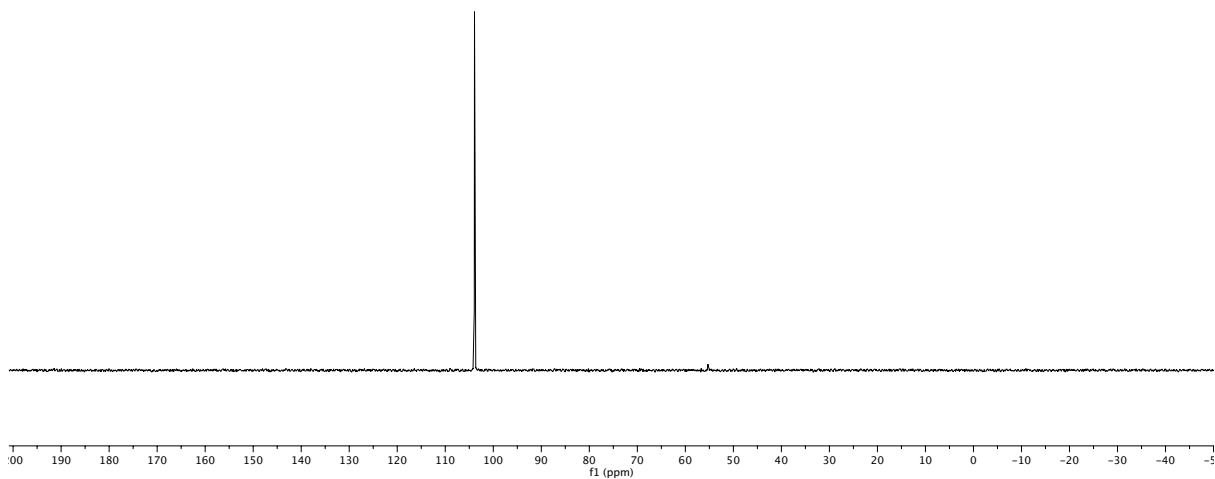

Compound  $\Psi$ -(Rp)-14  $^1\text{H}$  NMR

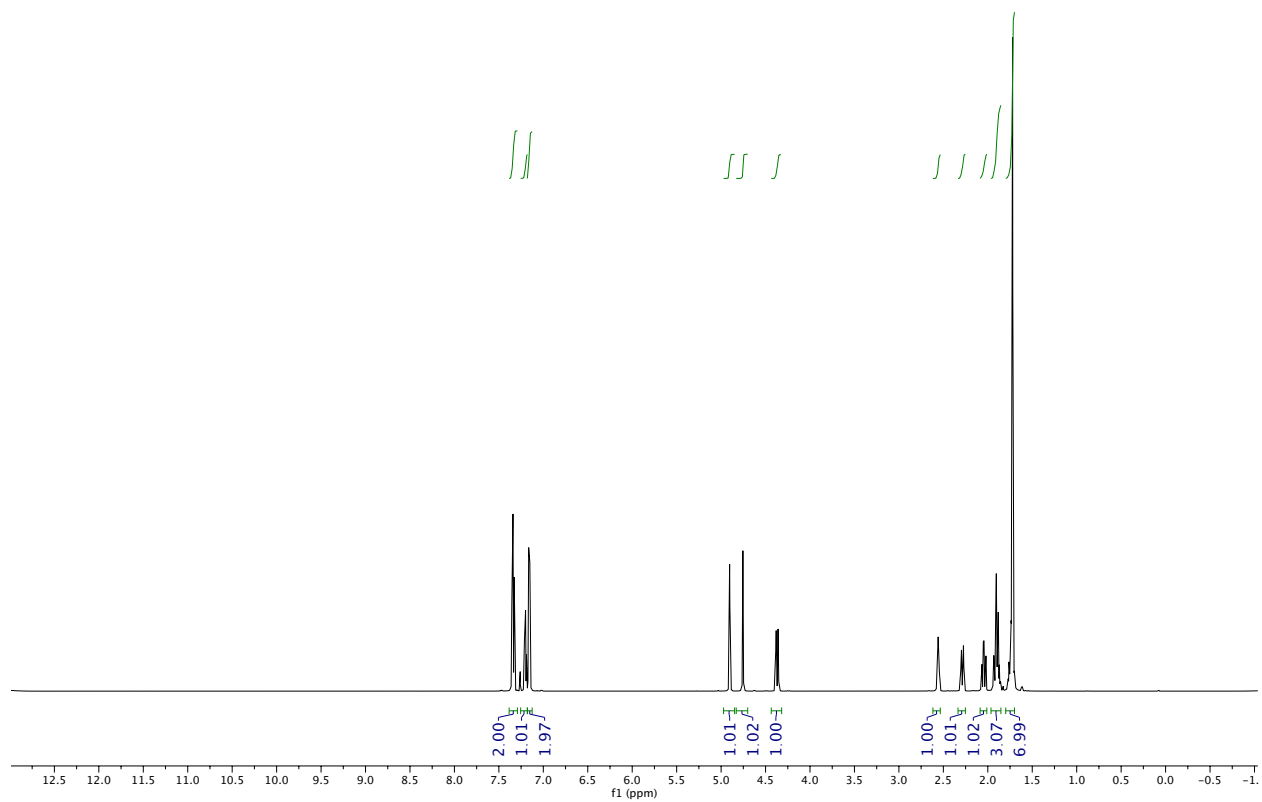

Compound  $\Psi$ -(Rp)-14  $^{13}\text{C}$  NMR

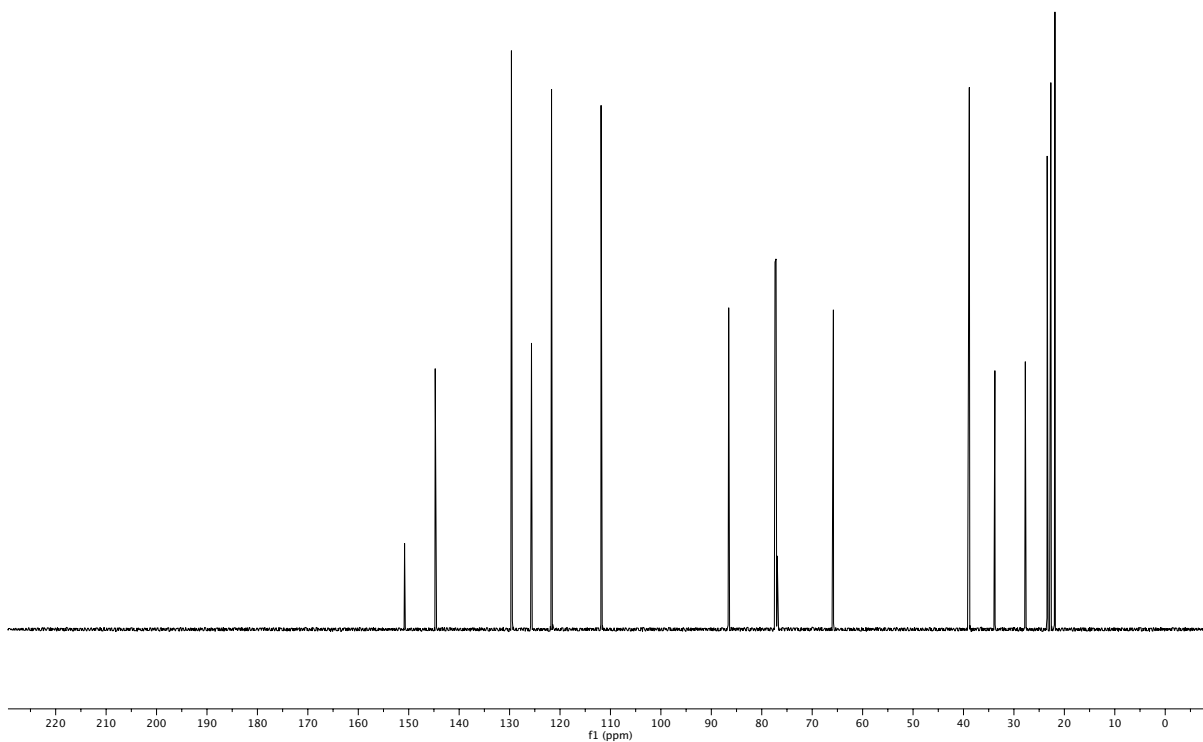

**Compound  $\Psi$ -(Rp)-14  $^{31}\text{P}$  NMR**

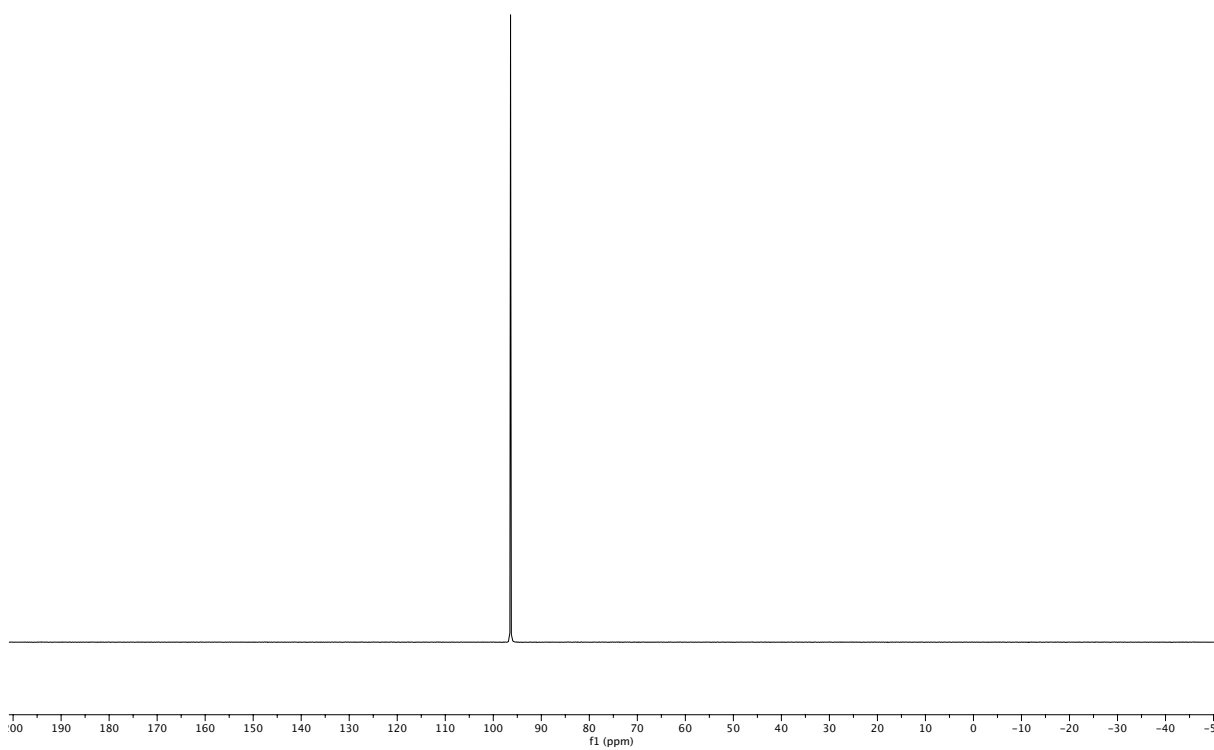

**Compound  $\Psi$ -15  $^1\text{H}$  NMR**

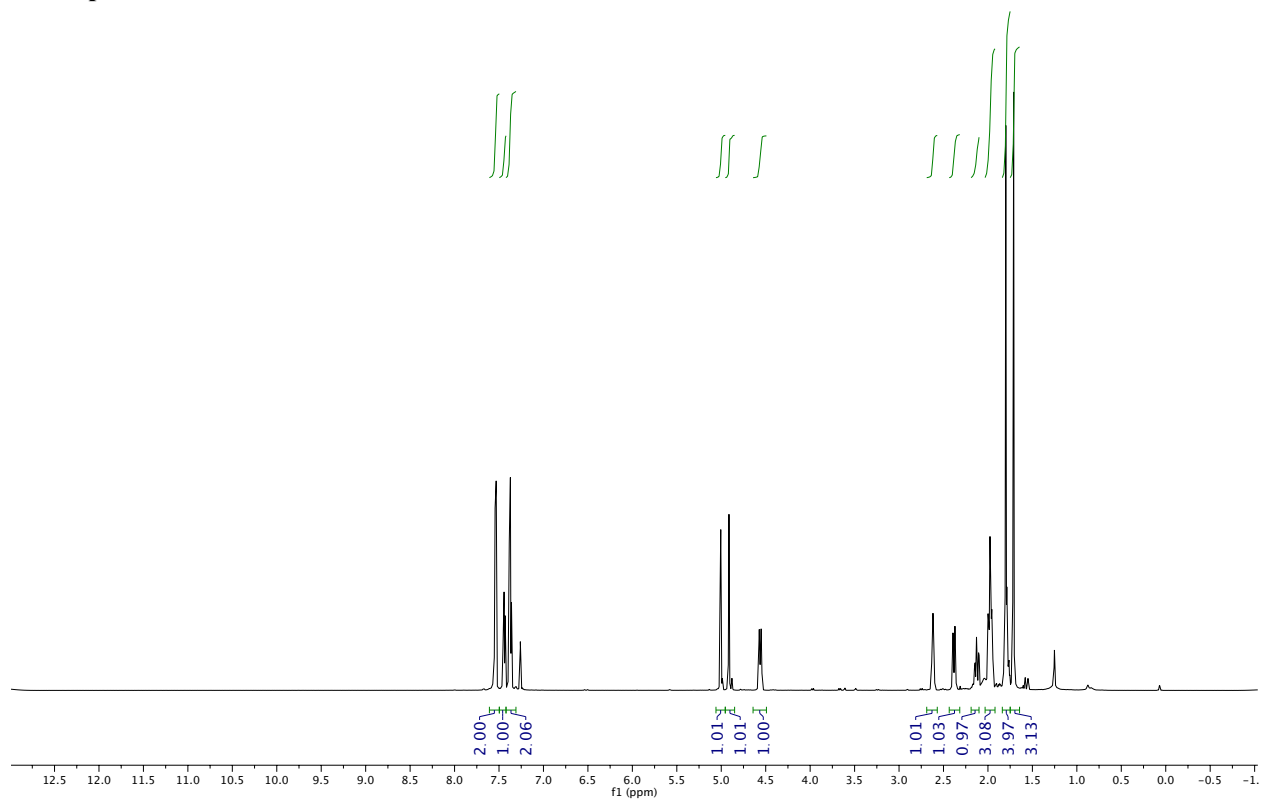

---

---

**Compound Ψ-15 <sup>13</sup>C NMR**

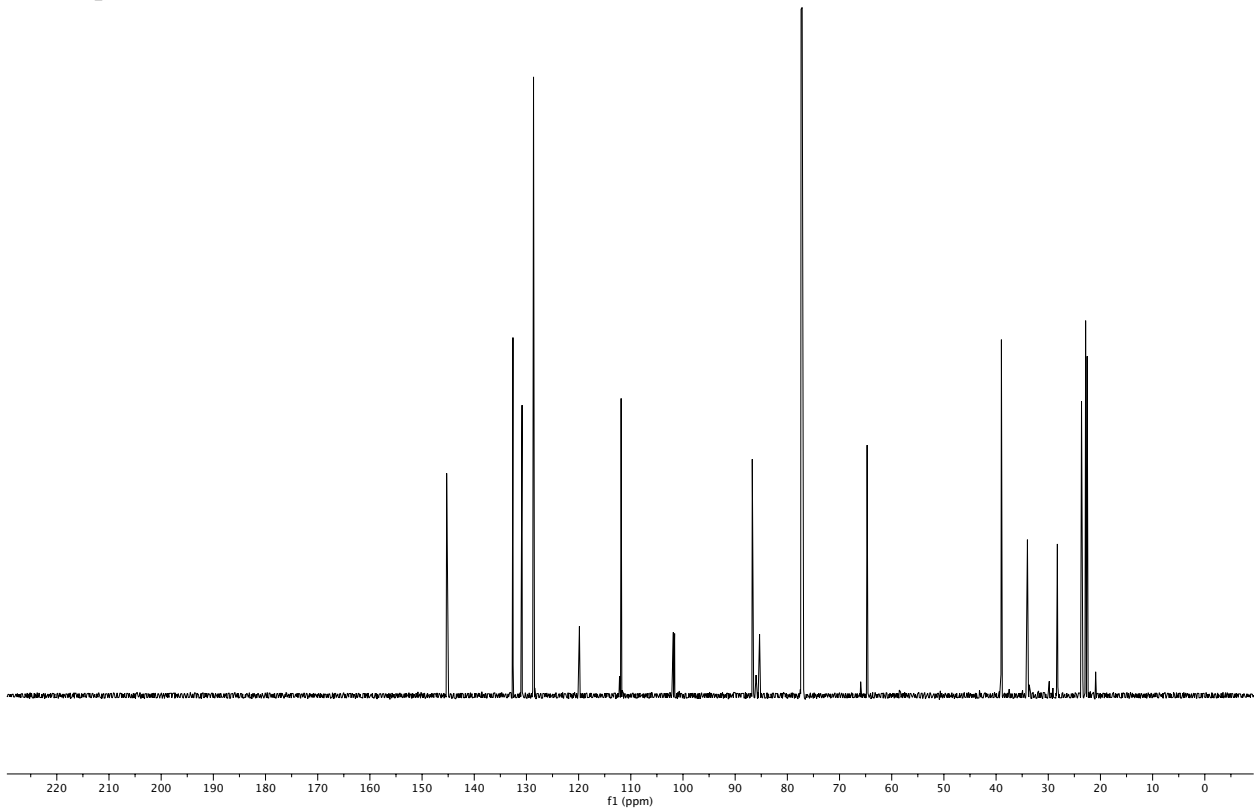

**Compound Ψ-15 <sup>31</sup>P NMR**

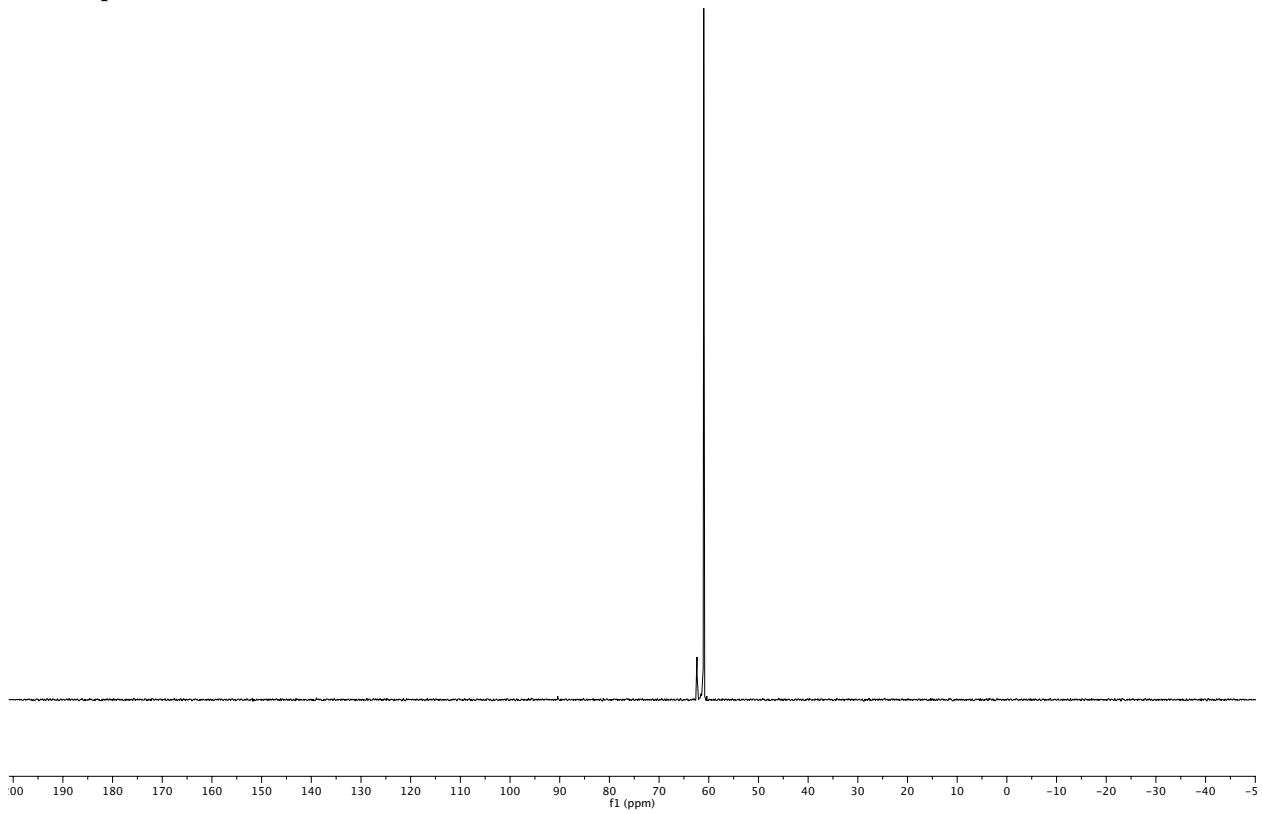



**Compound Ψ-16 <sup>1</sup>H NMR**

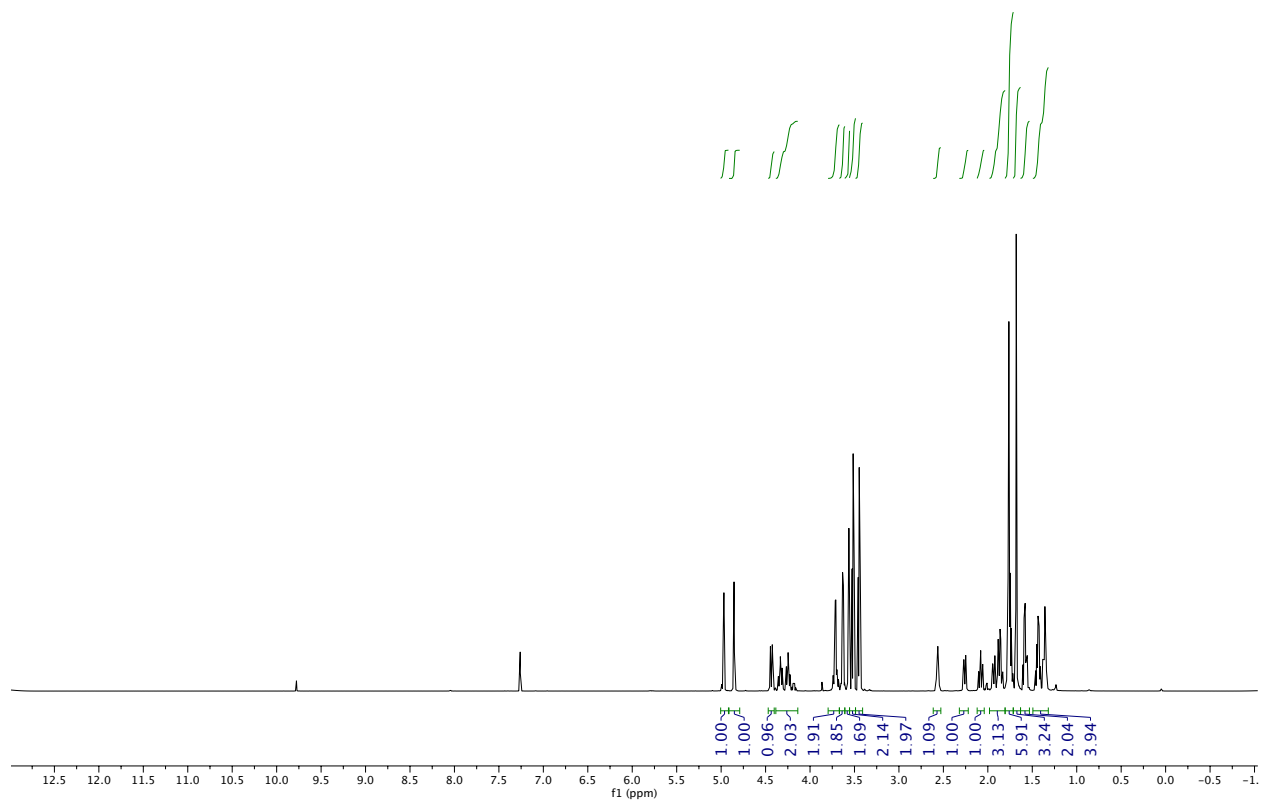

**Compound Ψ-16 <sup>13</sup>C NMR**

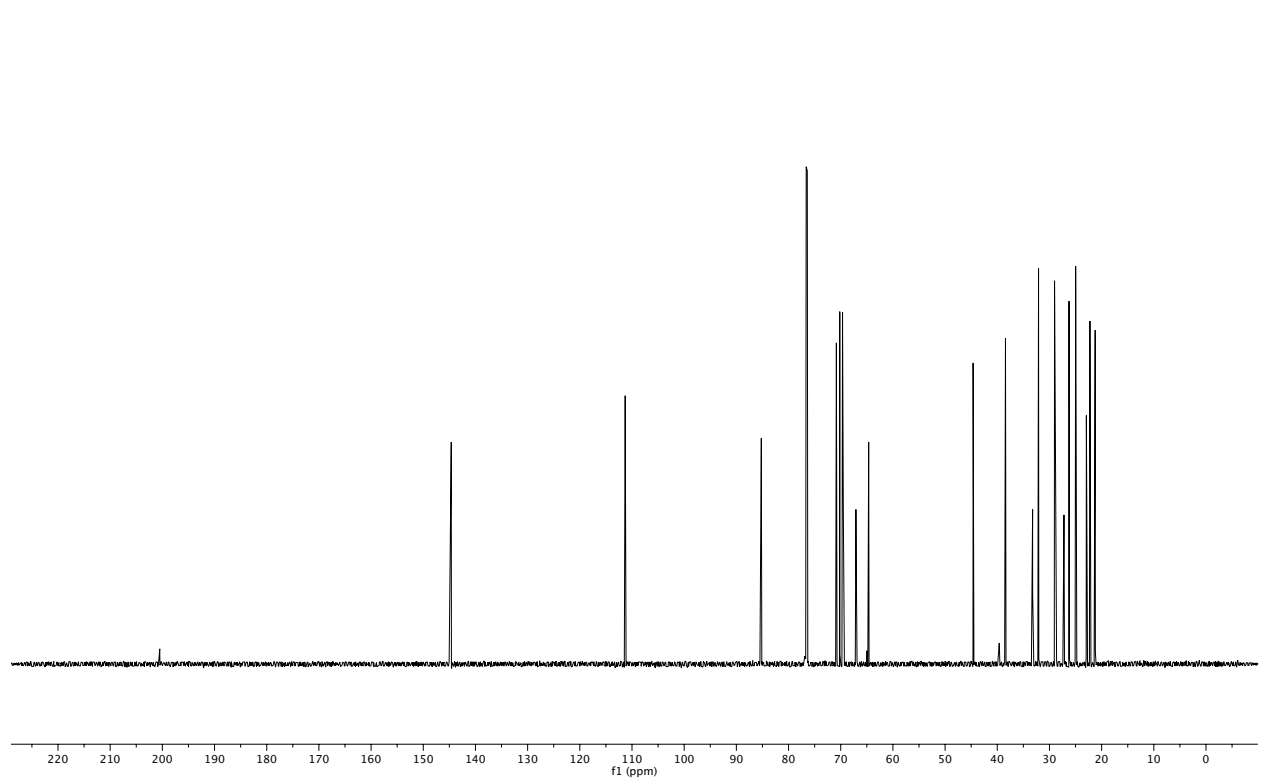

Compound  $\Psi$ -16  $^{31}\text{P}$  NMR

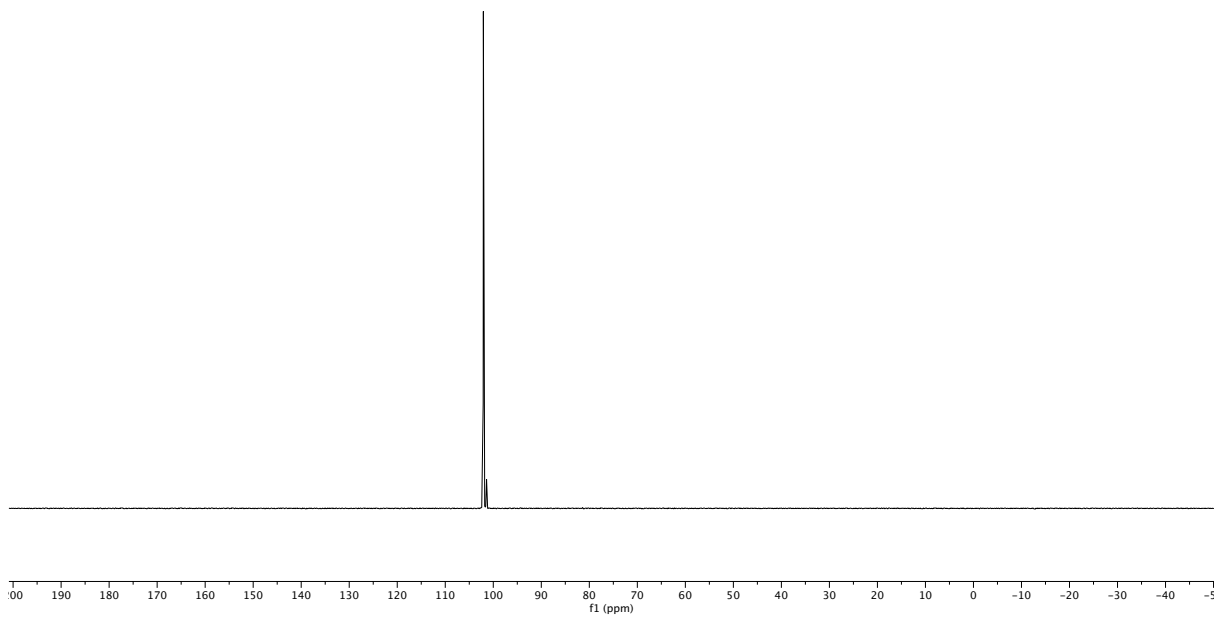

Compound  $\Psi$ -17  $^1\text{H}$  NMR

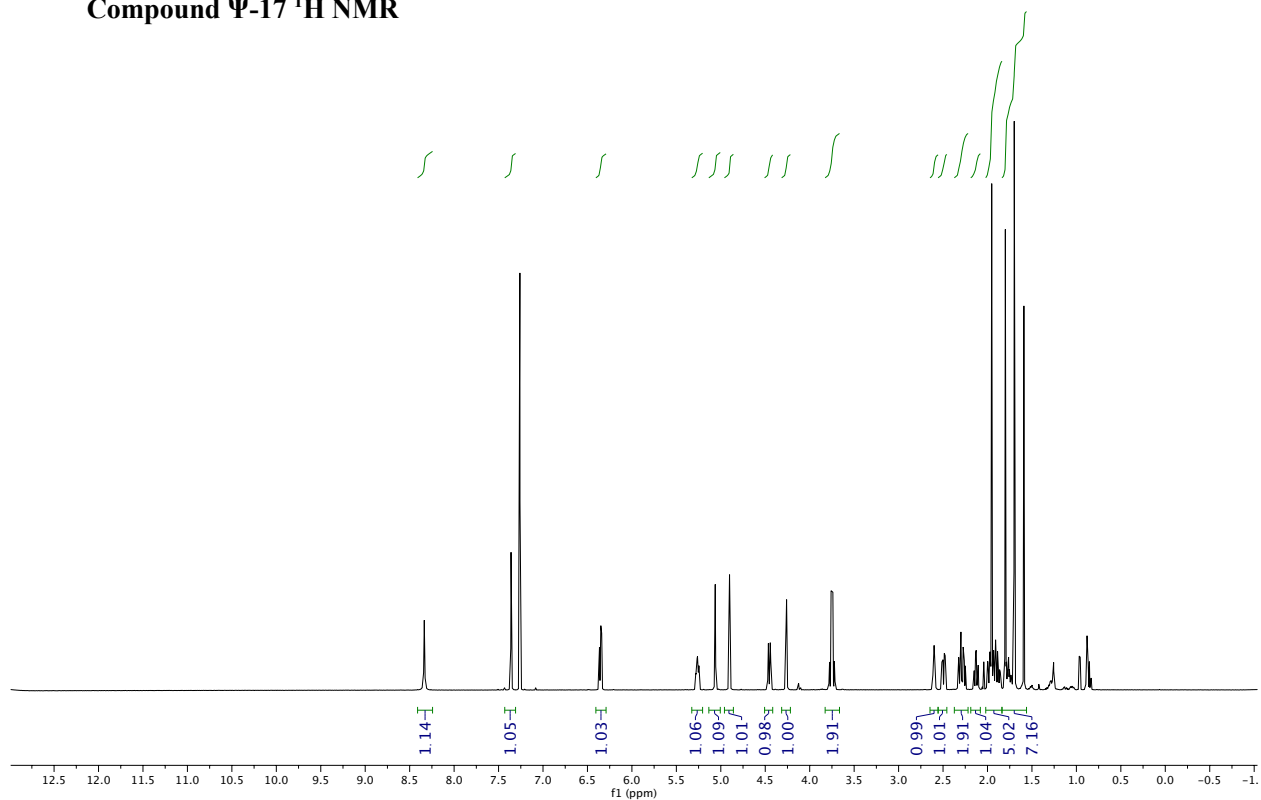

---

---

**Compound  $\Psi$ -17  $^{13}\text{C}$  NMR**

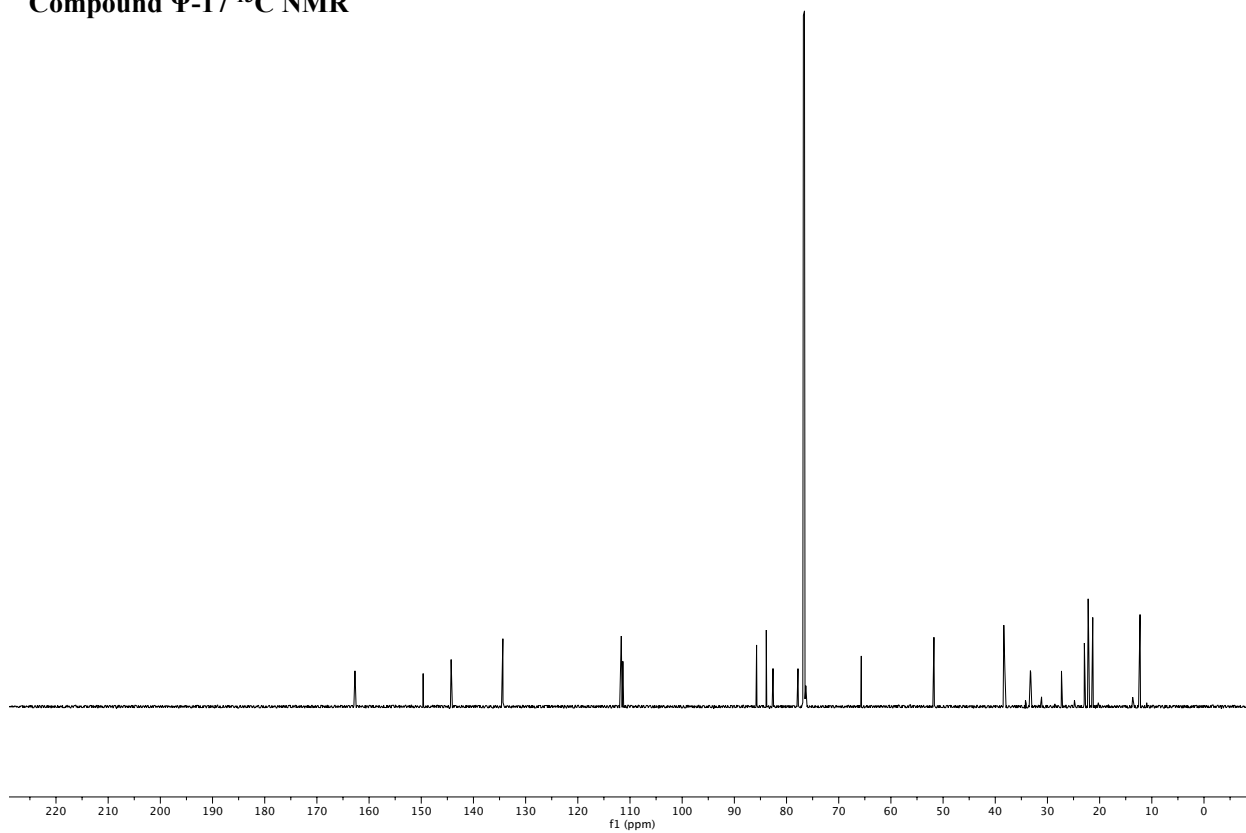

**Compound  $\Psi$ -17  $^{31}\text{P}$  NMR**

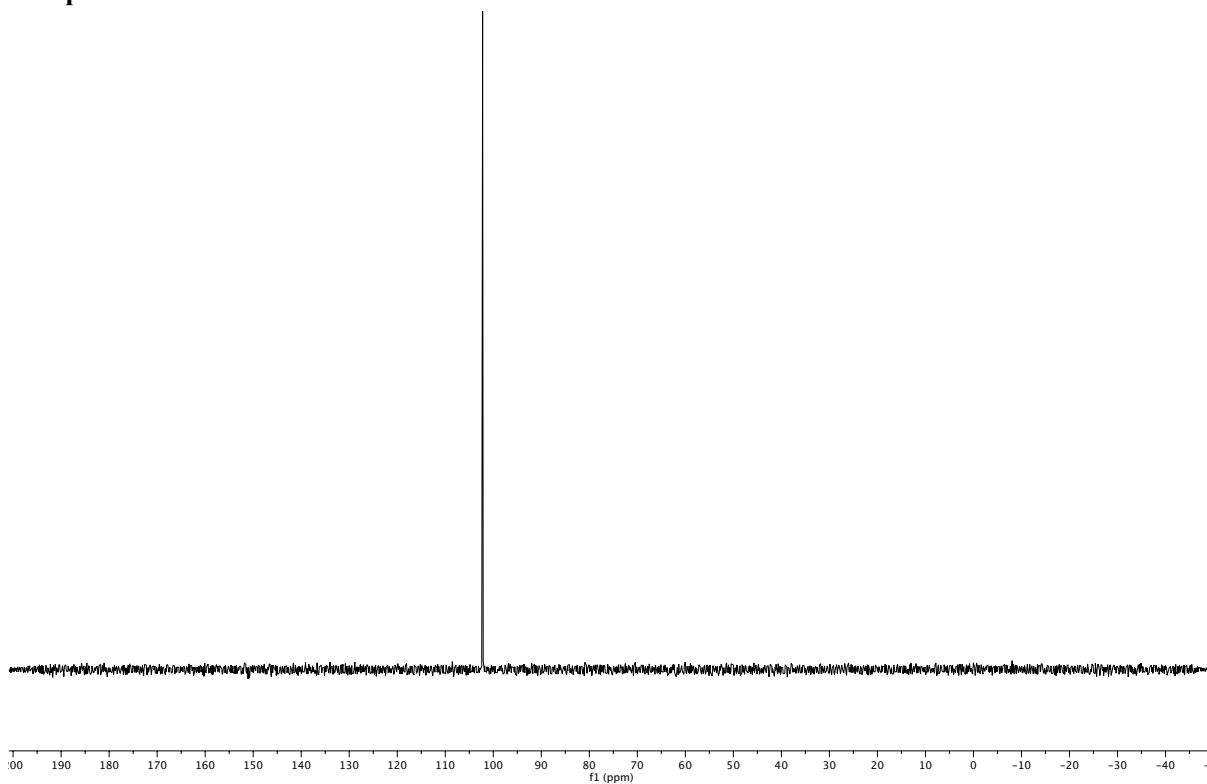

**Compound Ψ-18 <sup>1</sup>H NMR**

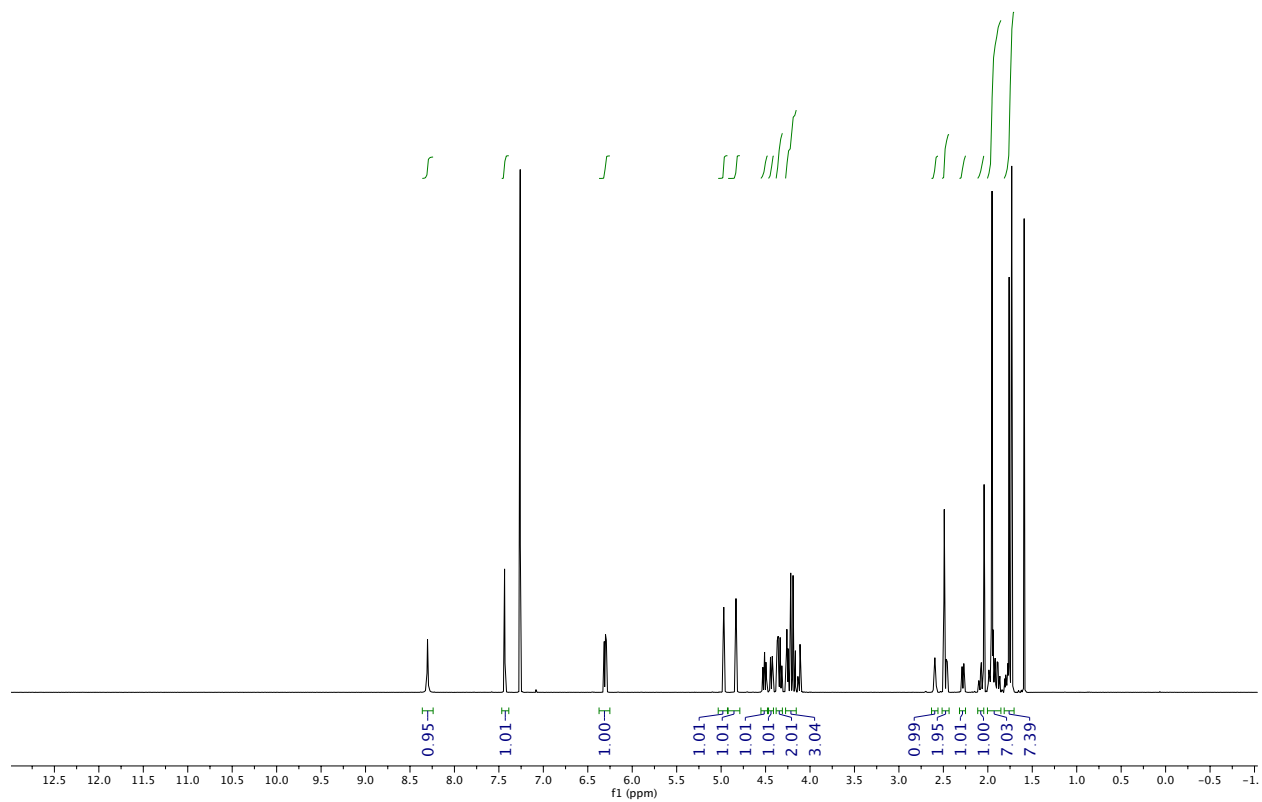

**Compound Ψ-18 <sup>13</sup>C NMR**

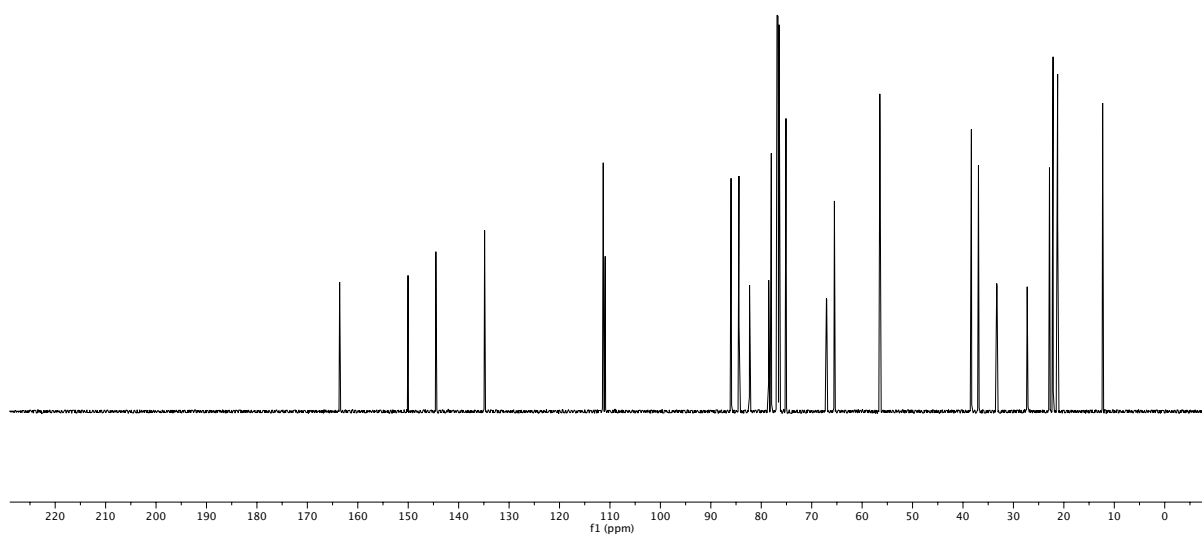

Compound  $\Psi$ -18  $^{31}\text{P}$  NMR

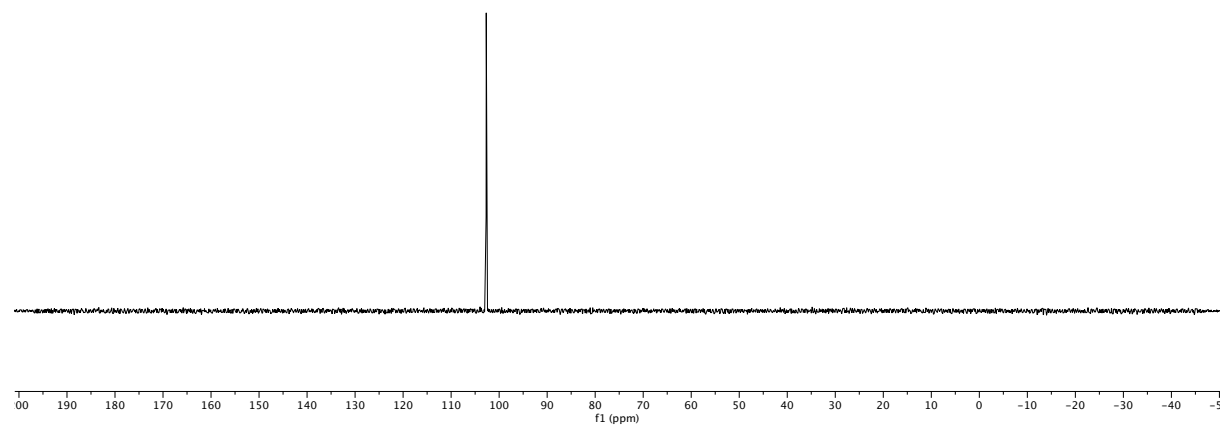

Compound  $\Psi$ -19  $^1\text{H}$  NMR

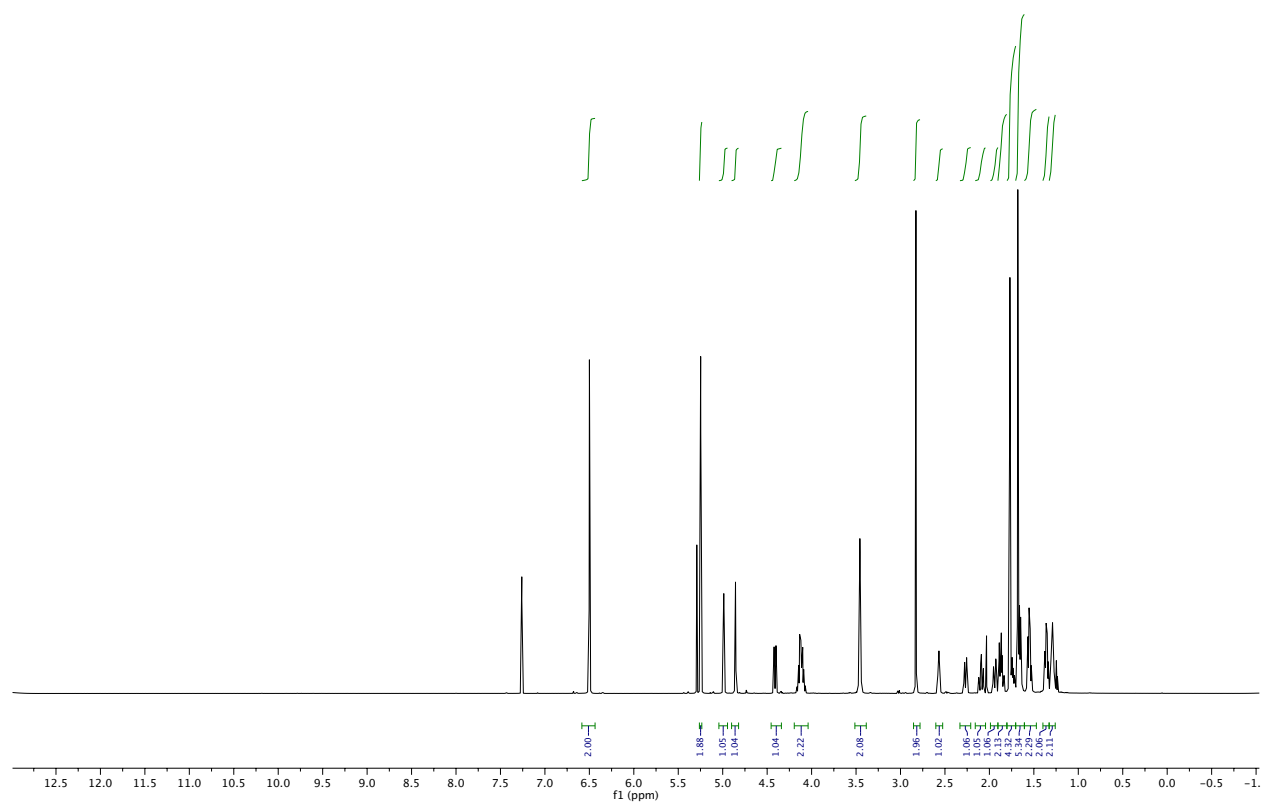

---

---

**Compound Ψ-19 <sup>13</sup>C NMR**

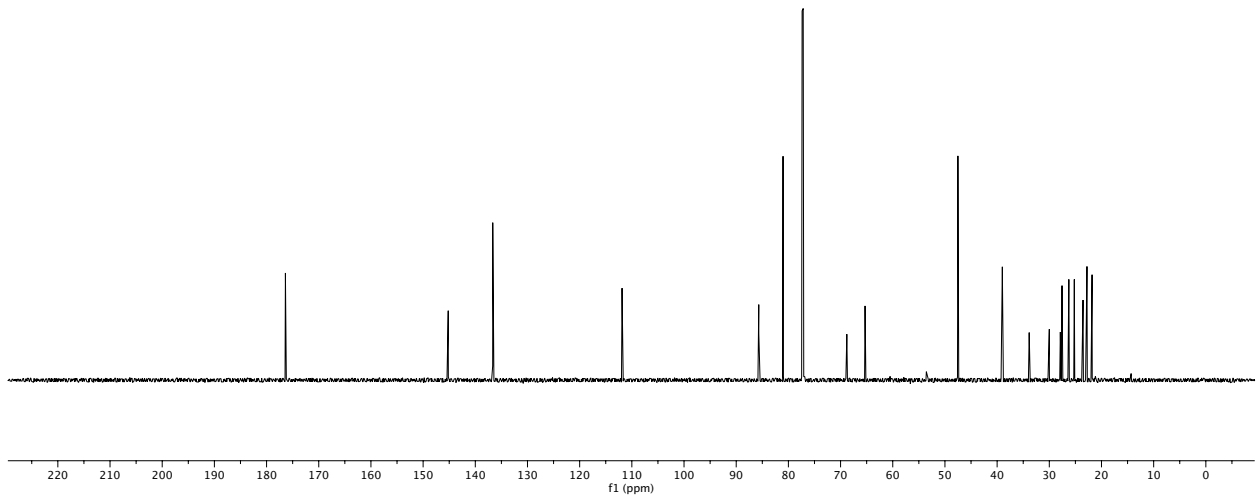

**Compound Ψ-19 <sup>31</sup>P NMR**

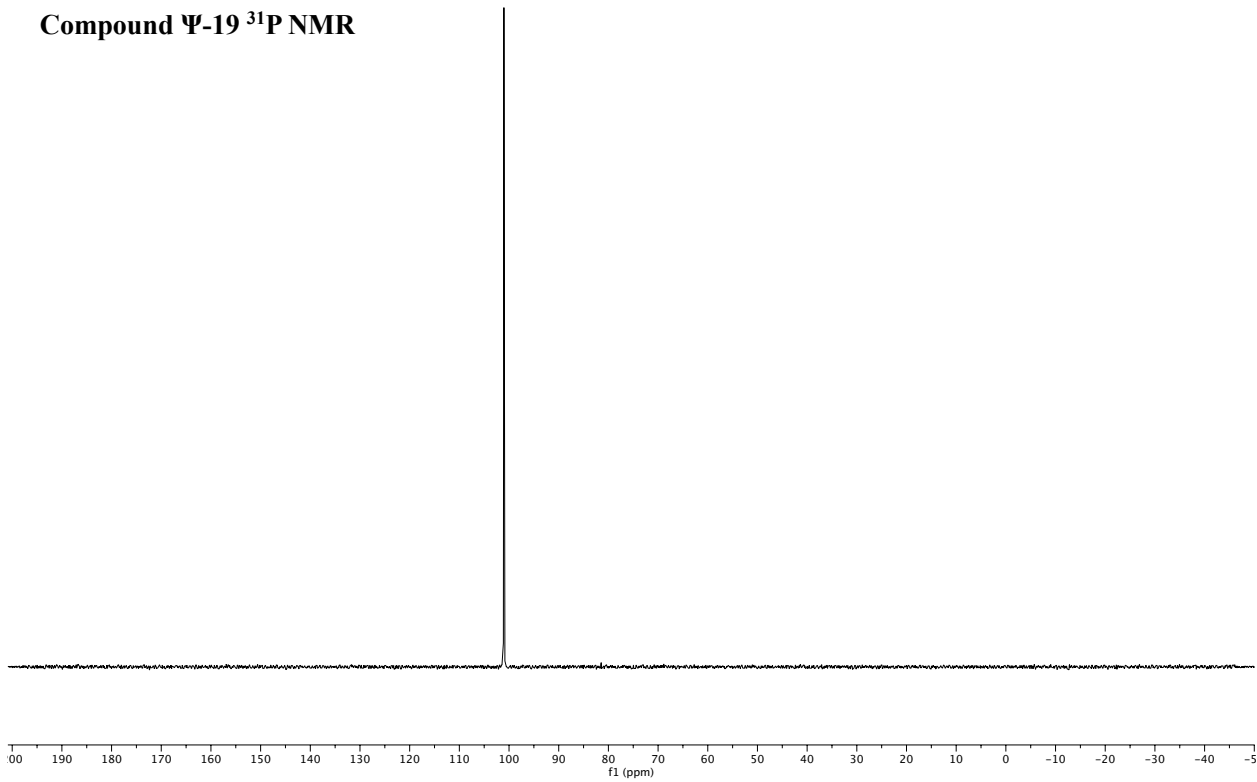

---

# SENDR Protocol

## General Procedure 2: SENDR in Microcentrifuge Tubes

### *Resin Preparation and DNA Loading*

1. Cut the tip off of a 1 mL pipette tip and transfer resin (100  $\mu$ L resin equilibrate in 1:1 PBS:MeCN, ~25 mg dry resin) with an adjustable volume pipette—Phenomenex Strata-XAL—into a 2 mL microcentrifuge tube.
2. Wash Resin with 500-1000  $\mu$ L PBS.
  - a. Spin down the resin slurry and aspirate the resin bed (by sucking off the supernatant with a glass pipet).
3. Add DNA (up to 50 nmol) in 100-500  $\mu$ L PBS, vortex and incubate at room temp for 5-15 min.

### *Resin Washing and Drying*

4. Wash loaded resin twice with DMA (500  $\mu$ L)
5. Wash loaded resin three times with dry THF (500  $\mu$ L)
6. Dry the resin for >2h in a speed vac or stuff a ball of paper in the top (so no resin can escape) and dry under vacuum for >2 h.
7. Resin Washing and Drying

### *Running the Reaction*

8. Dissolve  $\Psi$ -Module in dry MeCN (150 mM, 250  $\mu$ M), and add it to the dry resin tube.
9. Add DBU (450 mM total, 18  $\mu$ L) to the reaction tube.
10. Vortex for 30 seconds and incubate for 60 minutes at room temperature or 37  $^{\circ}$ C.

### *Working up Reaction*

11. Aspirate reaction mixture and discard.
12. Wash reaction with MeCN or DMA (500  $\mu$ L)
13. Wash with PBS or 1:1 PBS:MeCN (500  $\mu$ L)

### *Elute DNA*

14. Add 300  $\mu$ L Elute Buffer (1 M NaClO<sub>4</sub>, 20% MeOH, 40 mM tris, pH 8.5) to resin bed.
15. Vortex for 30 seconds and agitate for 5-10 minutes.
16. Carefully collect the elution butter with micropipette without sucking up any resin.
17. Desalt with your preferred method.

---

---

*Note:* Strata-XAL is designed for large analytes. Strata-XAL is a 100  $\mu\text{m}$  particle with 300  $\text{\AA}$  pore size.

*Note:* “Washing the resin” refers to adding 500 to 1000  $\mu\text{L}$  of solvent to the resin, vortexing (30 sec), spinning the resin down, and removing the supernatant with a pipette.

*Note:* Dry acetonitrile should be used for best reaction conversion.

*Note:* The elute buffer which contains 1 M  $\text{NaClO}_4$ , 20% MeOH, 40 mM tris, pH 8.5 should be accessed with high quality NaClO, Acros Organics is our preferred supplier (part number AC197122500)



---

---

## Troubleshooting and Frequently Asked Questions

*1. When I try to pellet my resin, it is too flocculant and is still in solution after taking out of the centrifuge.*

Allow the resin tube to sit for 5-10 minutes undisturbed to allow the resin to settle to the bottom of the tube.

*2. How do I remove the supernatant with a pipette?*

Gently suck off the supernatant while trying to leave the resin bed undisturbed. Keeping the pipette tip a few millimeters off the top of the resin bed usually helps with this, also allowing a small amount of liquid to remain on the top of the resin bed is alright.

*3. My  $\Psi$ -Module is not dissolving, what do I do?*

To get the  $\Psi$ -Module dissolved you may need to sonicate the solution for up to 10 minutes. Usually this is sufficient to dissolve all of the PSI-module. If this does not work, transfer heterogeneous PSI-module solution to the reaction solution and add the DBU. Usually upon addition of DBU the rest of the PSI-module will dissolve.

*4. My reaction resulting in low conversions, what should I do.*

Try to heat the reaction to 37 °C.

---

### General Procedure 3: SENDR in Fritted Cartridges (Kit Format)

#### Resin Preparation

1. Break off bottom of preloaded (with 100  $\mu$ L Strata-XAL resin in 1:1 PBS:MeCN) Biorad column. Or transfer equilibrated resin (100  $\mu$ L) to the column as above.
2. Allow packing solution to flow through into waste.
3. Add PBS (500  $\mu$ L) and allow to flow through into waste.

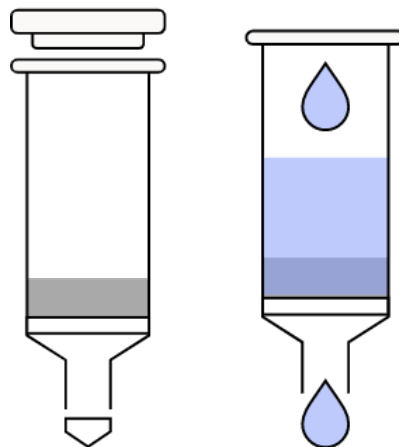

#### DNA Loading:

4. Cap the bottom spout and add DNA (up to 50 nmol in 100-500  $\mu$ L PBS) to column.
5. Cap the top, vortex and agitate for 5-15 min.

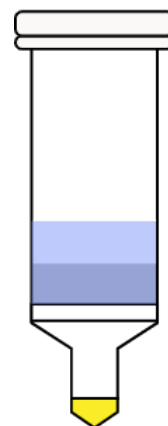

#### Resin Washing and Drying

6. Wash loaded resin twice with DMA (500  $\mu$ L) and allow to flow to waste.
7. Wash loaded resin three times with dry THF (500  $\mu$ L) and allow to flow to waste.
8. Replace the top cap but *not the bottom* and dry the resin for >2h in under vacuum.

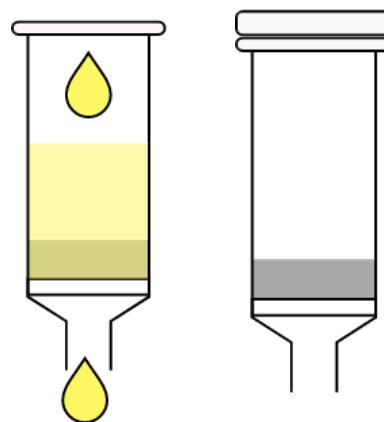

---

### *Running the Reaction*

9. Add a NEW, CLEAN, and DRY cap to the bottom of the column.
10. Dissolve  $\Psi$ -Module in dry MeCN (300 mM, 125  $\mu$ L) or add the supplied PSI-Module solution to dry resin tube.
11. Add DBU in dry MeCN (300 mM, 125  $\mu$ L) or add the supplied DBU solution to resin tube.
12. Replace both caps, vortex for 30 seconds, and incubate for 60 minutes at 37  $^{\circ}$ C.

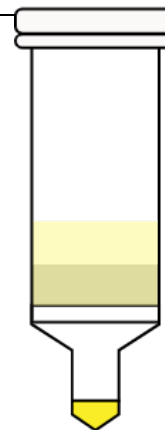

### *Working up Reaction*

13. Remove both caps and allow the reaction mixture to drain to waste.
14. Wash reaction with MeCN or DMA (500  $\mu$ L) allow to drain to waste
15. Wash with PBS or 1:1 PBS:MeCN (500  $\mu$ L) allow to drain to waste

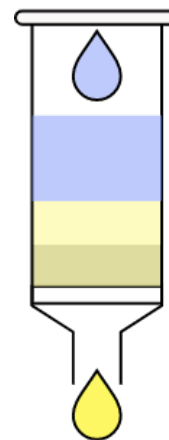

### *Elute DNA*

16. Replace bottom cap. Add 300  $\mu$ L Elute Buffer (1 M NaClO<sub>4</sub>, 20% MeOH, 40 mM tris, pH 8.5) to resin bed and then replace top cap.
17. Vortex for 30 seconds and agitate for 5-10 minutes.
18. Remove both caps and allow elute buffer to drain into a collection tube.
19. Desalt with your preferred method.

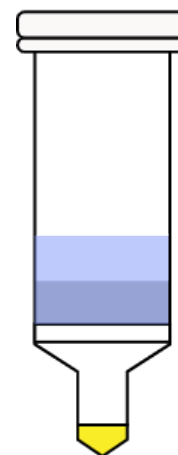

---

*Note:* Allow flow throughs to occur under gravity not under vacuum.

*Note:* Agitating the resin can be done with an end over end tumbler or an orbital shaker.

*Note:* Drying the resin under vacuum can be performed using a lyophilizer, high vac, or speed vac (if the columns fit).

---

## Troubleshooting and Frequently Asked Questions

*1. The storage solution in the column takes a long time to drain, what do I do?*

Sometimes, an air bubble forms at the bottom of the column and surface tension prevents the solution from flowing through. Put gentle pressure on top of the column using a gloved finger. Once you see a single drop drip out of the bottom of the column, allow the rest of the solution flow through by gravity.

*2. When I add the PBS to wash the resin, it takes a long time to drip out?*

See above.

*3. Why do I need a dry bottom cap while running the reaction?*

Any water remaining on the cap might quench the  $\Psi$ -Module. Using a new, clean, dry cap ensures that no water enters the reaction mixture.

*4. How do I get my DNA out of the elute buffer?*

Almost any standard DNA desalting method will work. We tend to use ethanol precipitations. Some prefer other methods that are faster but require different DNA consumable kits. In our hands both silica-based desalting columns and gel filtration worked for desalting of modified DNA.

---

**General Procedure 4: *In Situ* Module Formation**

*In some instances, it may be advantageous to directly prepare a module in solution and immediately use it in the SENDR process without isolation.*

To a solution of alcohol (1.0 equiv.) and (–)-Ψ (1.3 equiv.) in anhydrous MeCN in a flame-dried round-bottom flask was added DBU (1.3 equiv.). After mixing for 5 minutes, the reaction was directly used in the SENDR protocol via General Procedure 2 or 3.

---

## Optimization of SENDR protocol and conditions

### Optimization Procedure

SENDER was optimized by performing reactions in a microcentrifuge tube as described in *General Procedure 2* with various reaction conditions (as described in the main text and Figure 2B). Briefly, 5 nmol of DNA **1** or **2** was loaded onto 100  $\mu\text{L}$  of equilibrated resin. This loaded resin was washed with DMA (500  $\mu\text{L}$  twice) and dry THF (500  $\mu\text{L}$  three times) and dried under vacuum. In the case in which stringent drying was not performed (Figure 2B, Entry 8) the loaded resin was simply washed with acetonitrile (500  $\mu\text{L}$  three times).

**$\Psi$ -1** in MeCN (varying concentration, 250  $\mu\text{L}$ ) was added to the loaded and dried resin,. Then DBU (various concentration) was added to the reaction mixture. The reaction tube was vortexed for 30 seconds and incubated at room temperature for various amounts of time. The reactions were worked up by aspirating and discarding the reaction solution, and washing the resin bed with MeCN (500  $\mu\text{L}$ ) and 1:1 MeCN:PBS (500  $\mu\text{L}$ ). Elute buffer (300  $\mu\text{L}$ ) was added to the resin bed and the tube was agitated by orbital shaker for 5-10 minutes. The DNA containing elution buffer was collected by carefully pipetting the supernatant. DNA was isolate *via* ethanol precipitation. Ethanol precipitation was performed by adding 10% v/v of a NaCl solution (30  $\mu\text{L}$ , 5M) to the elute buffer and three volumes of cold ethanol (-20  $^{\circ}\text{C}$ ) were added to the tube (~1000 $\mu\text{L}$ ) and incubated for 18 hours at -20  $^{\circ}\text{C}$ . The tube was then centrifuged at 13,000 rpm for 15 minutes to pellet the DNA, and the supernatant ethanol was decanted off. The tubes were dried *via* speed vacuum, the DNA was dissolved and HPLC-MS analysis was performed.

## Characterization of SENDR Optimization

### LCMS Characterization of 3

Produced from **1** by General Procedure **2**:

Conversion (A260): 91%

Expected Mass: 7023.61

Expected (M-6)/6 Ion: 1169.60

Found Deconvoluted Mass: 7024.00

Found (M-6)/6 Ion: 1169.61

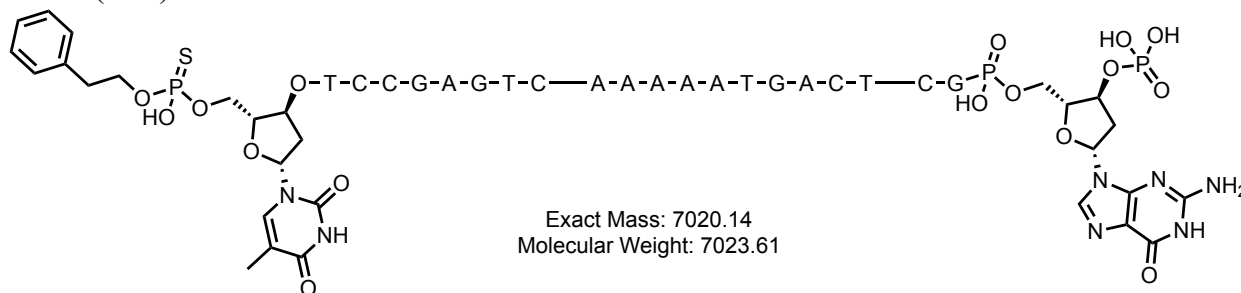

### A260 Chromatogram

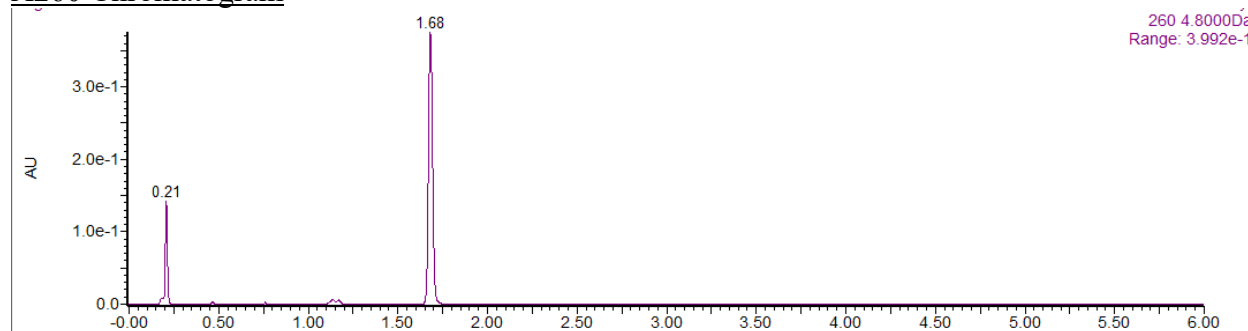



Mass Spectrum (RT= 1.68 min)

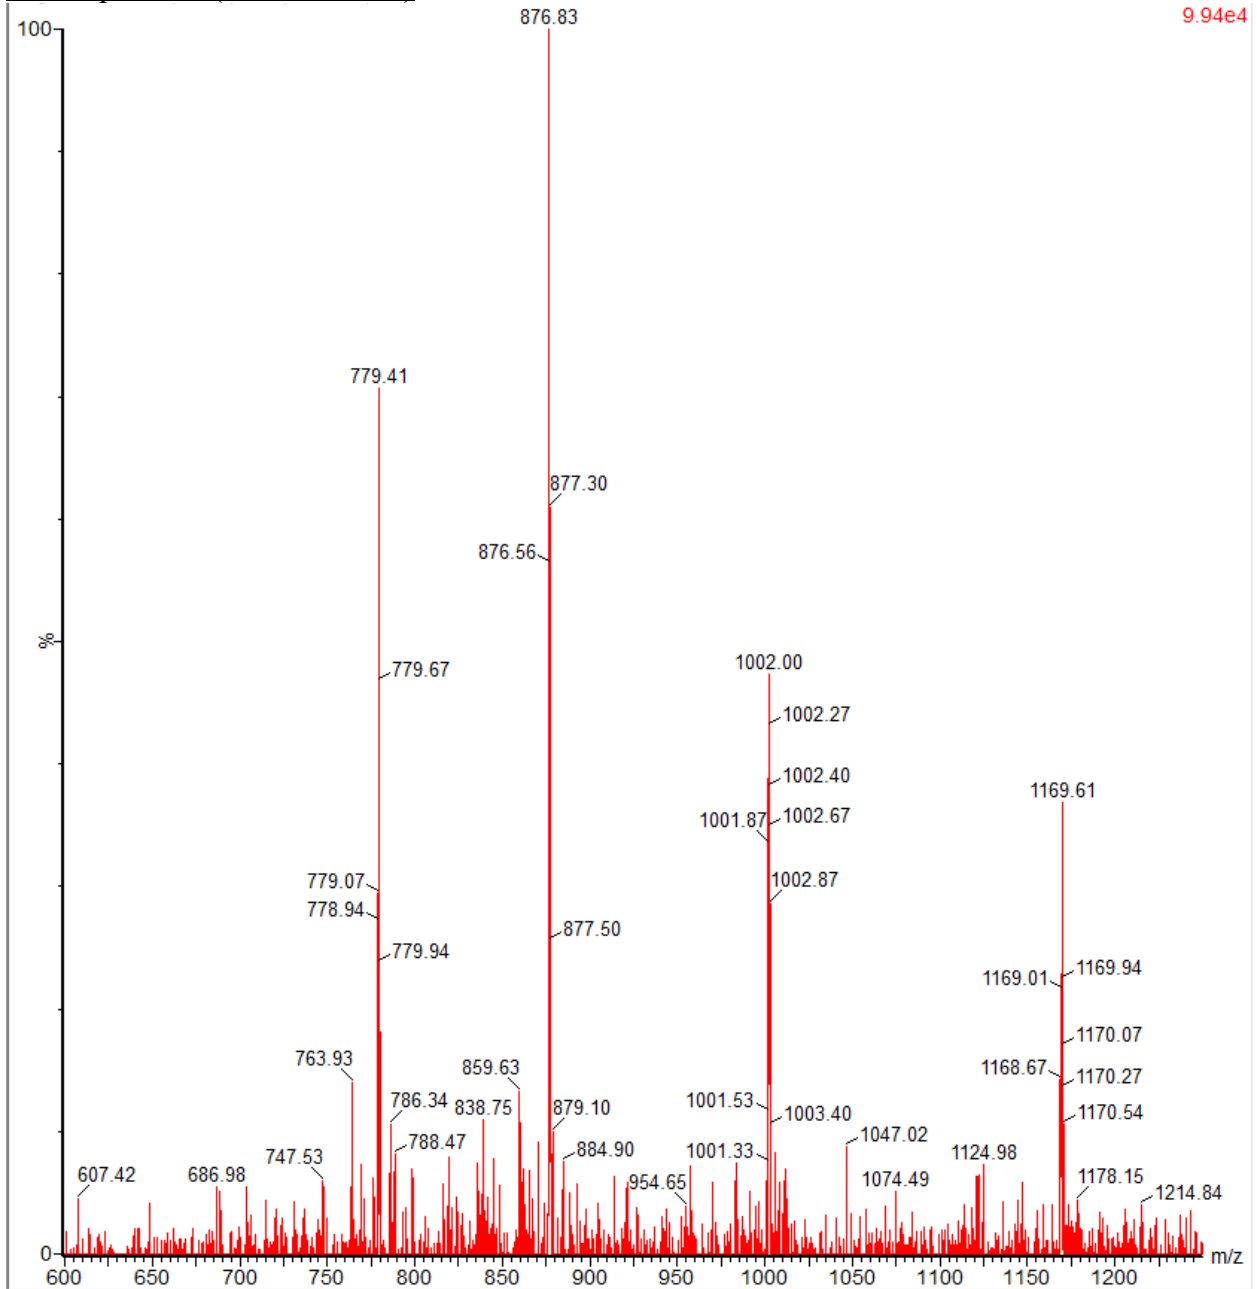

9.94e4

# Deconvoluted Mass Spectrum

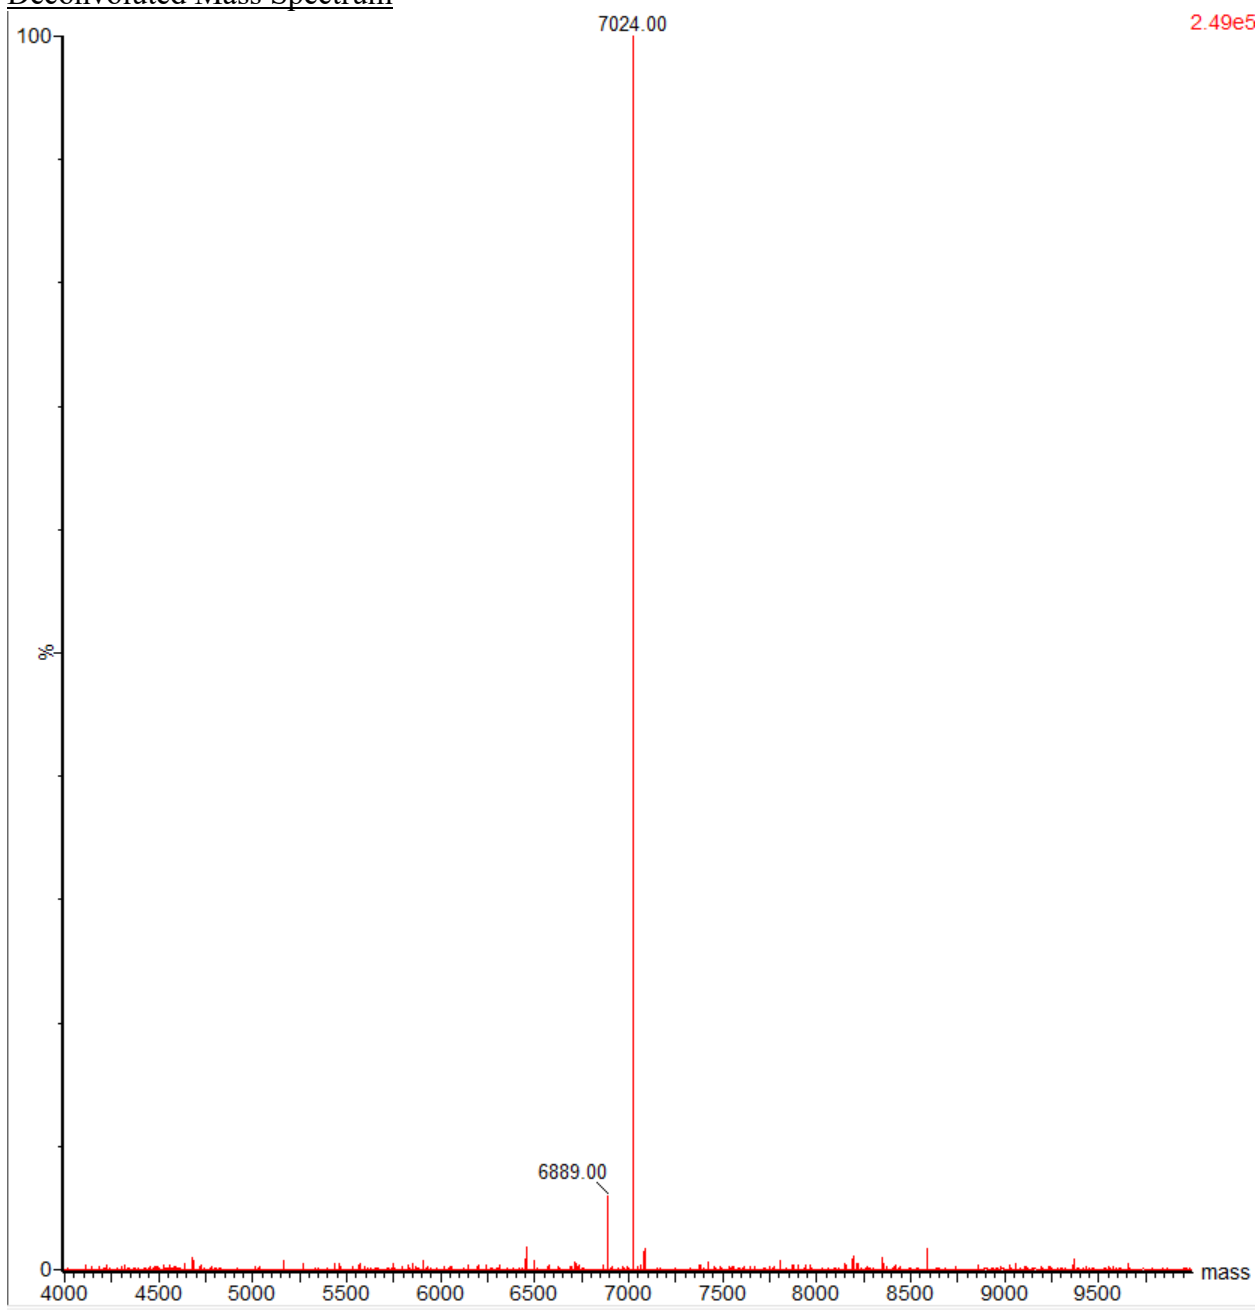

## LCMS Characterization of 4

Produced from **2** by General Procedure **2**:

Conversion (A260): 72%

Expected Mass: 7023.61

Expected (M-6)/6 Ion: 1169.60

Found Deconvoluted Mass: 7024.00

Found (M-6)/6 Ion: 1169.01

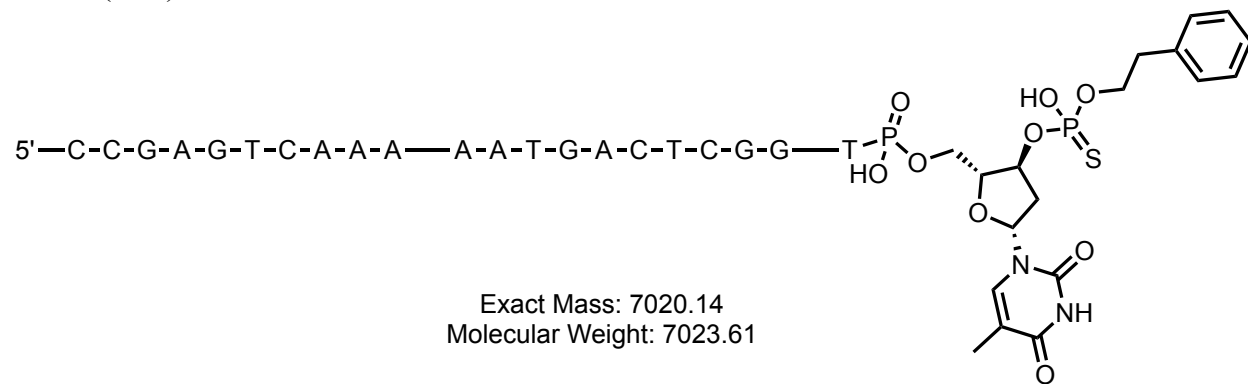

## A260 Chromatogram

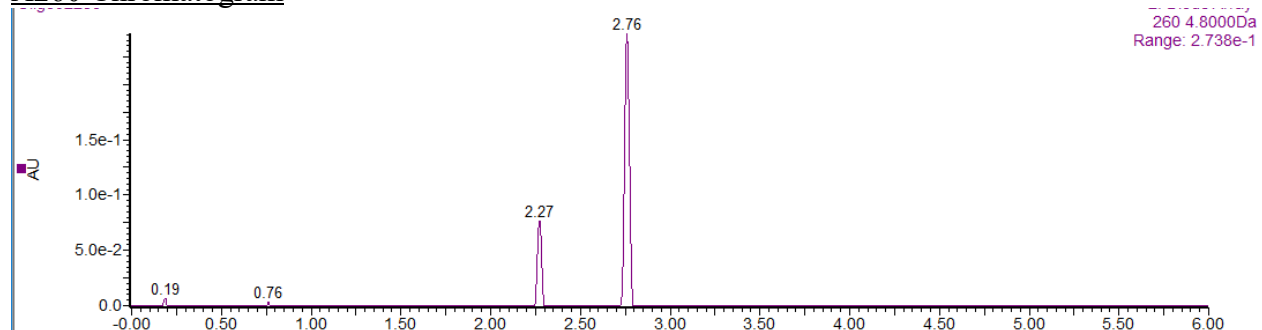

Mass Spectrum (RT= 2.76 min)

7.59e5

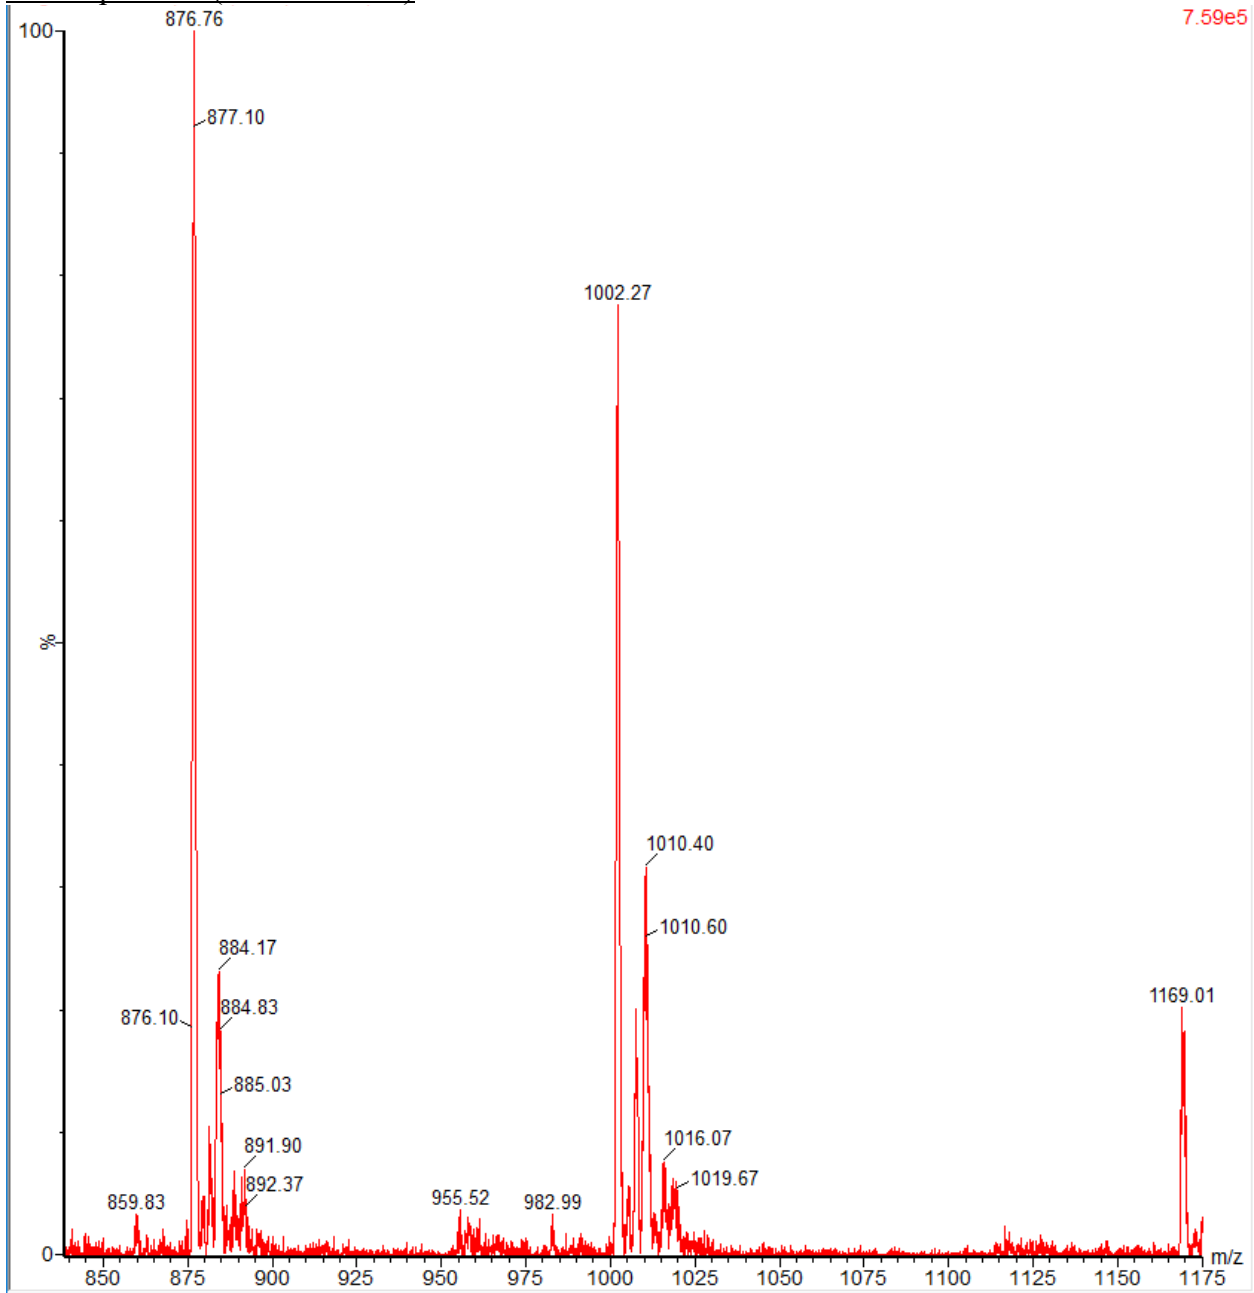

# Deconvoluted Mass Spectrum

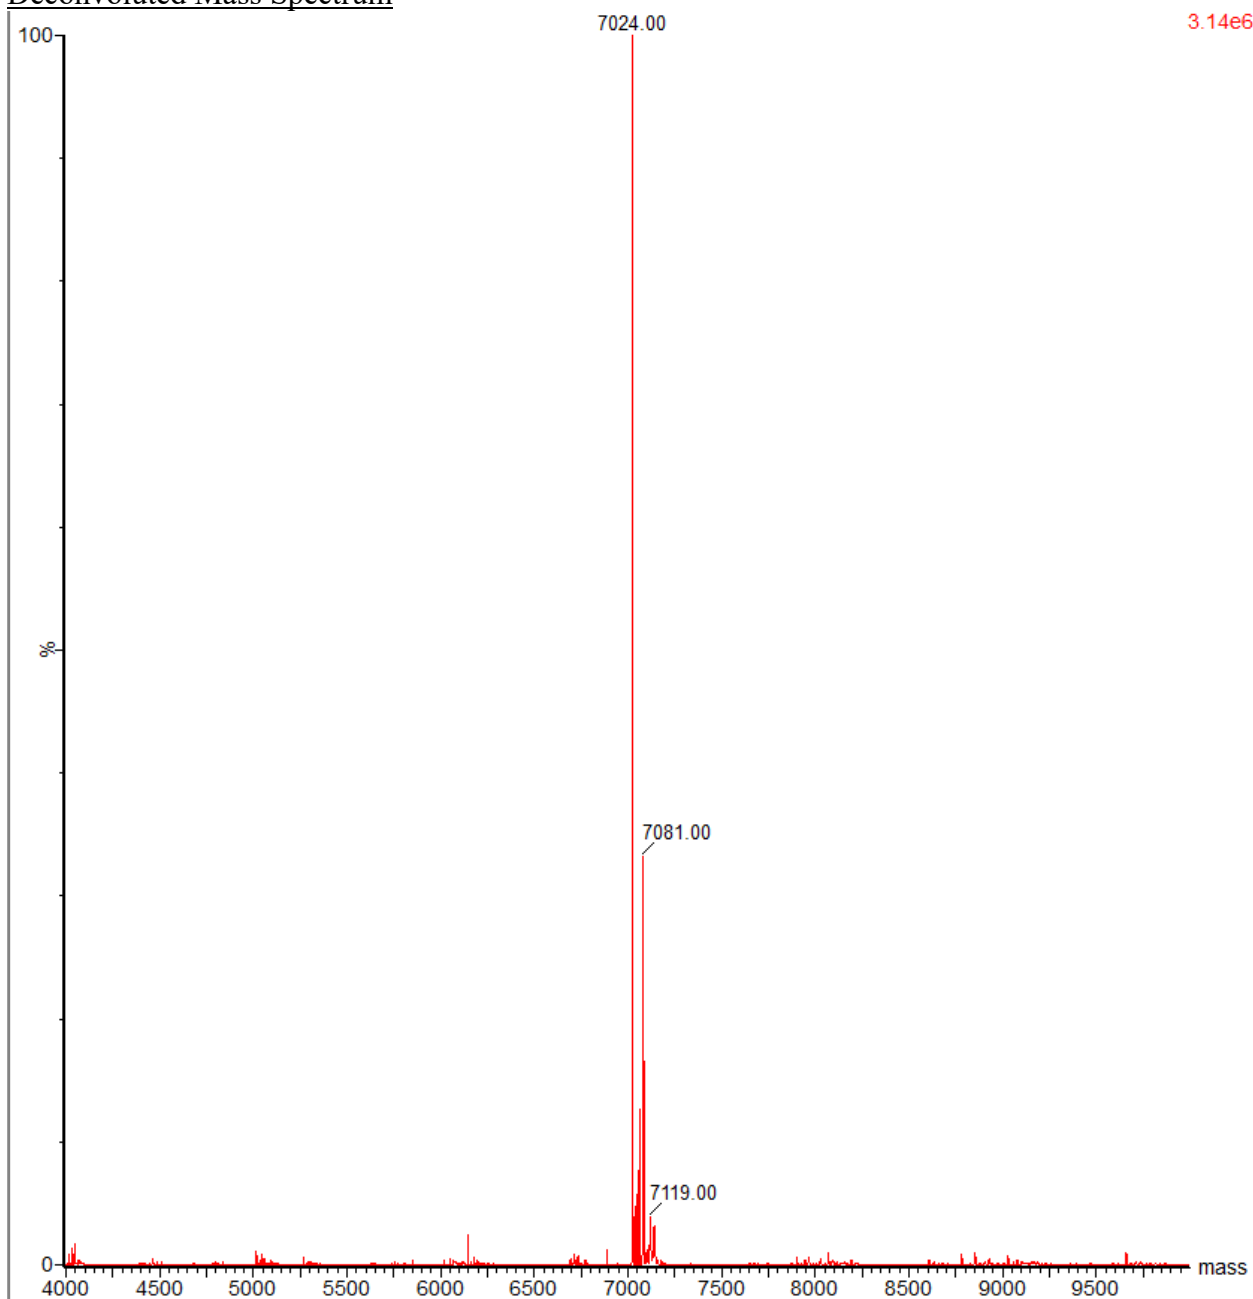

---

### **Process for Mass Fragmentation of 3**

A crude solution of **3** in water (100  $\mu$ M) was injected on the Waters I-Class ToF for peak identification. The MS cone voltage was then increased from 5 mV to 30 mV and the same sample was reinjected to fragment the modified oligonucleotide. Diagnostic mass fragments were then extracted, and their presence confirmed in the total ion current. They are plotted below along with total ion current and UV absorbance. UV absorbance is slightly out of alignment because there is a non-zero-time difference between when the compound passes through the UV detector and when it enters the mass spec. This is because of the plumbing between the two modules.

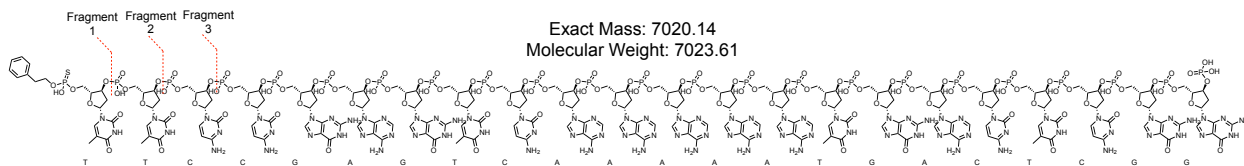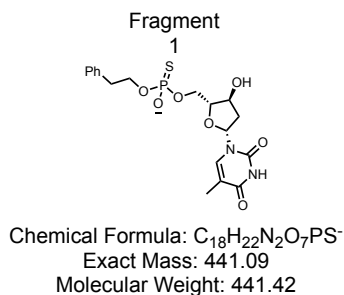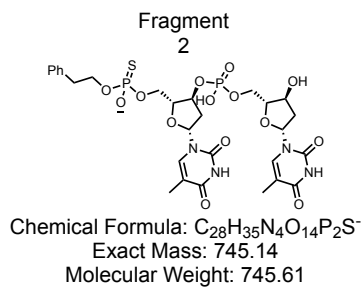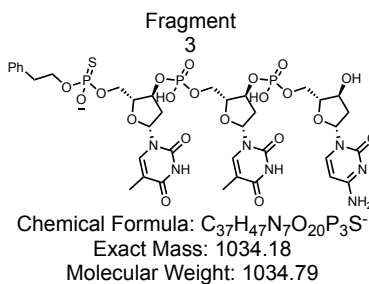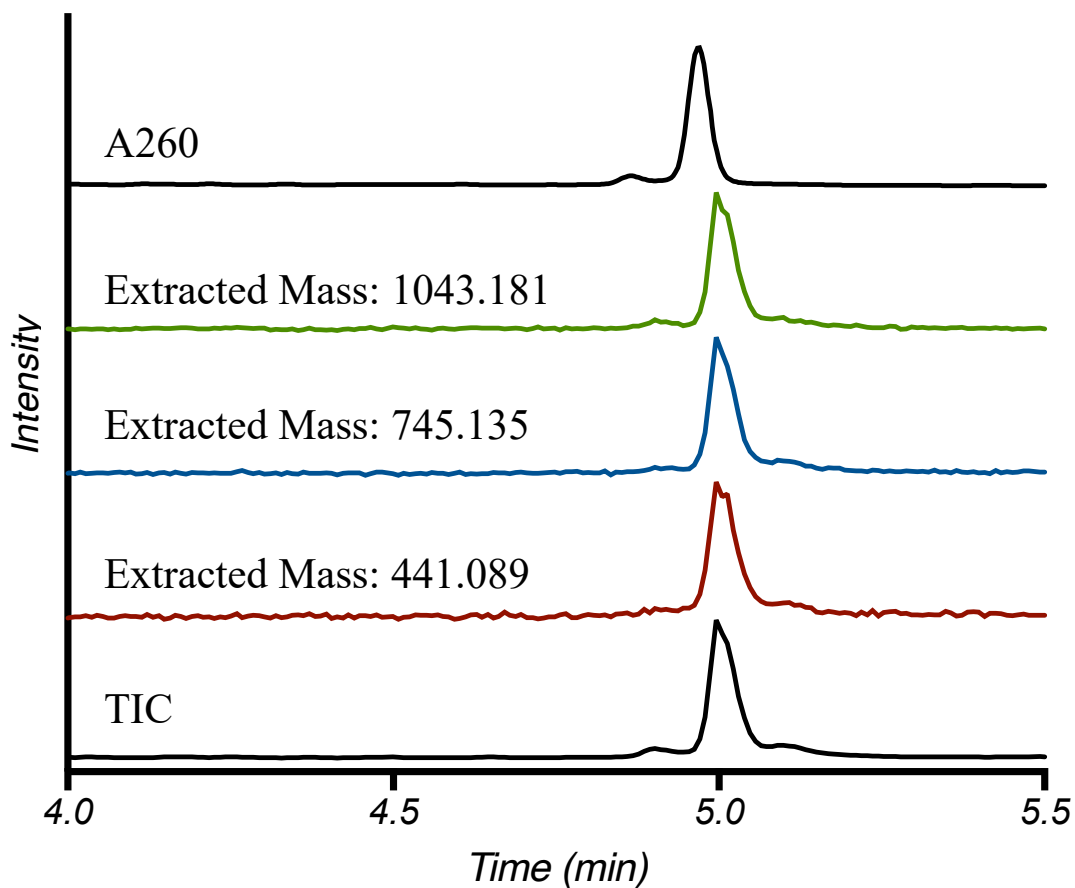

## Analysis of Optimization Reactions

### Entry 1: 5'

LCMS Characterization of **3**

Produced from **1** by General Procedure **3**:

Conversion (A260): 56%

Expected Mass: 7023.61

Expected (M-6)/6 Ion: 1169.60

Found Deconvoluted Mass: 7024.00

Found (M-6)/6 Ion: 1169.54

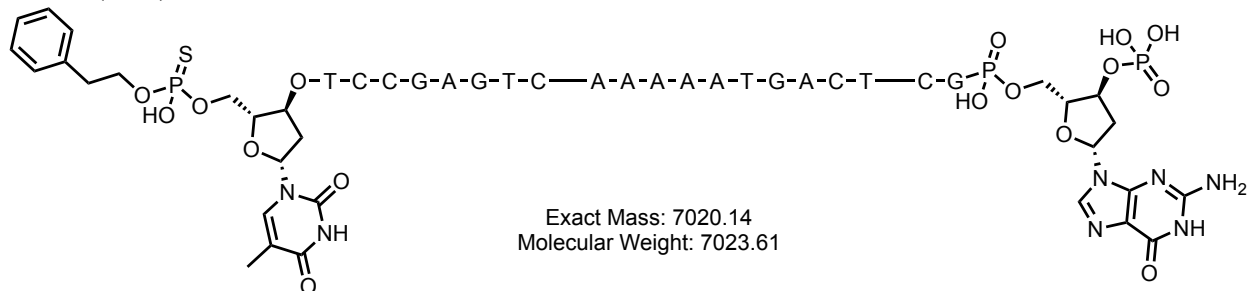

### A260 Chromatogram

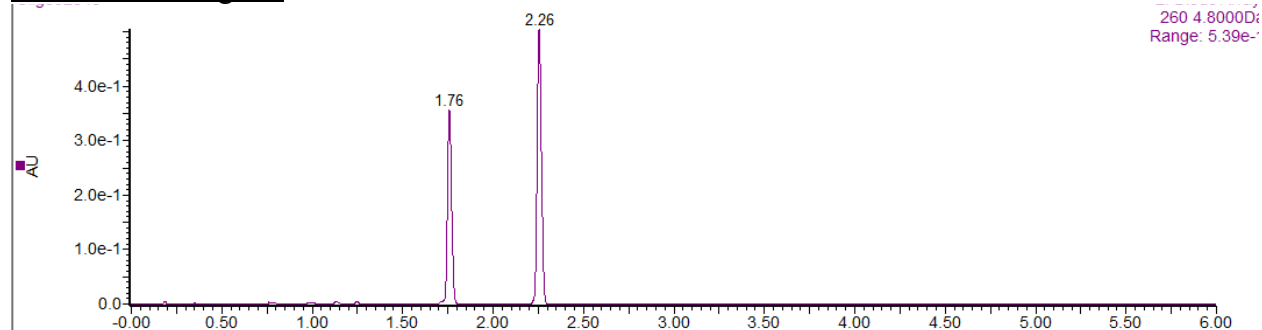



Mass Spectrum (RT= 3.26 min)

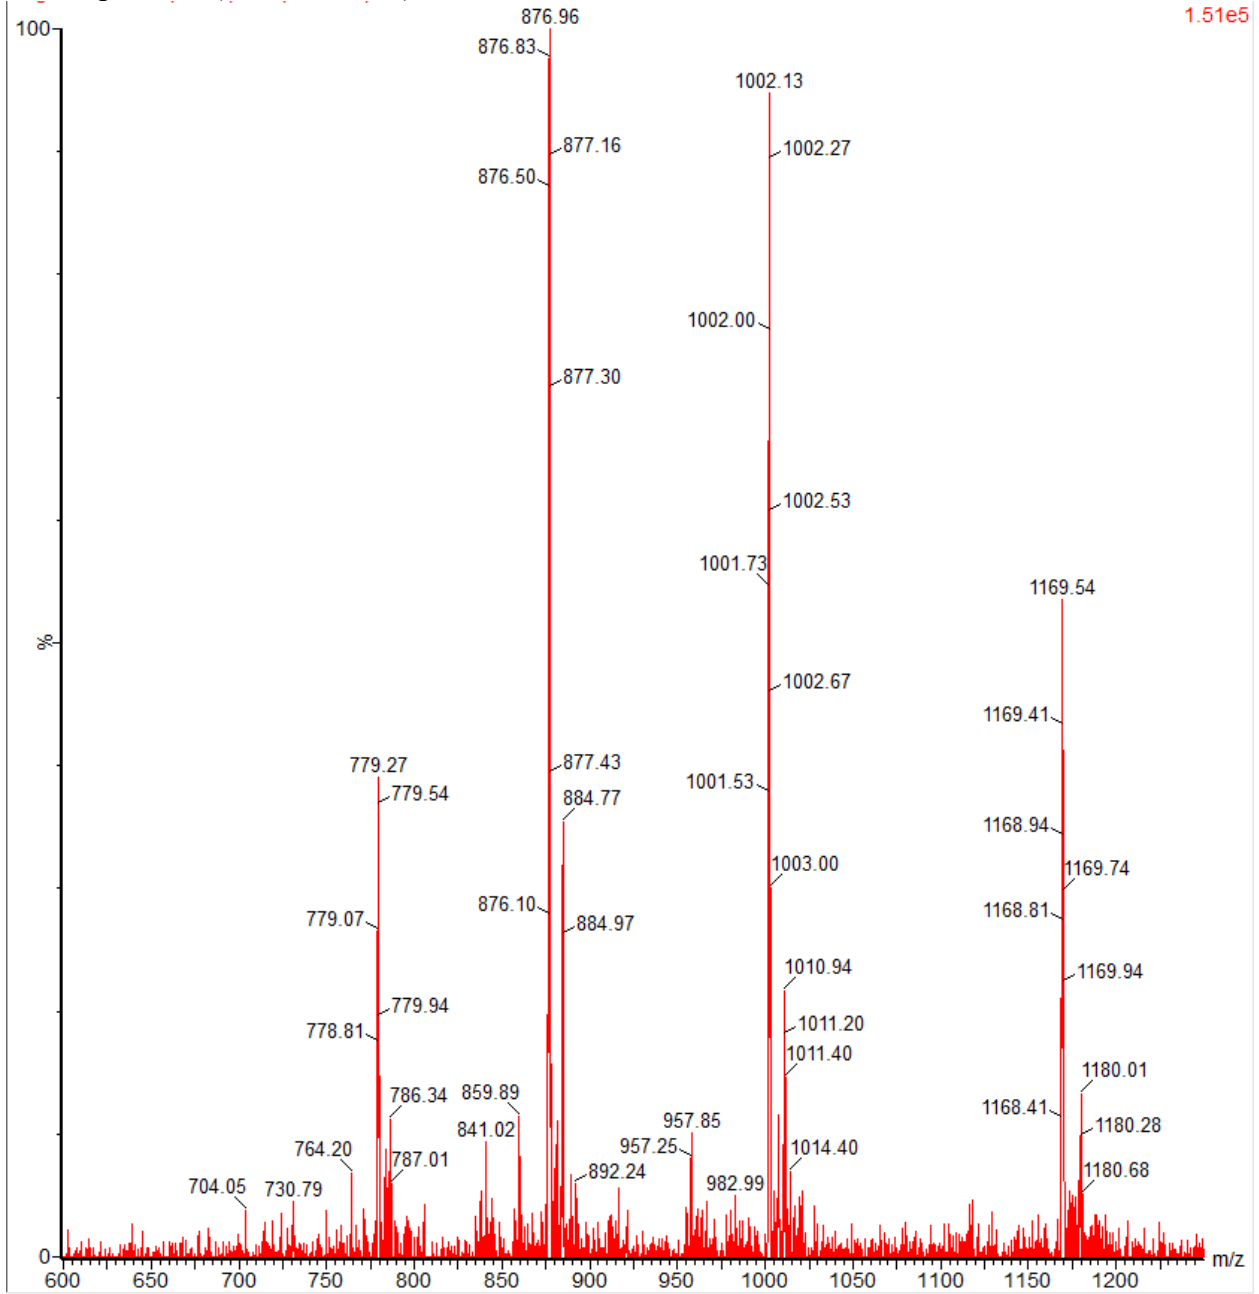

# Deconvoluted Mass Spectrum

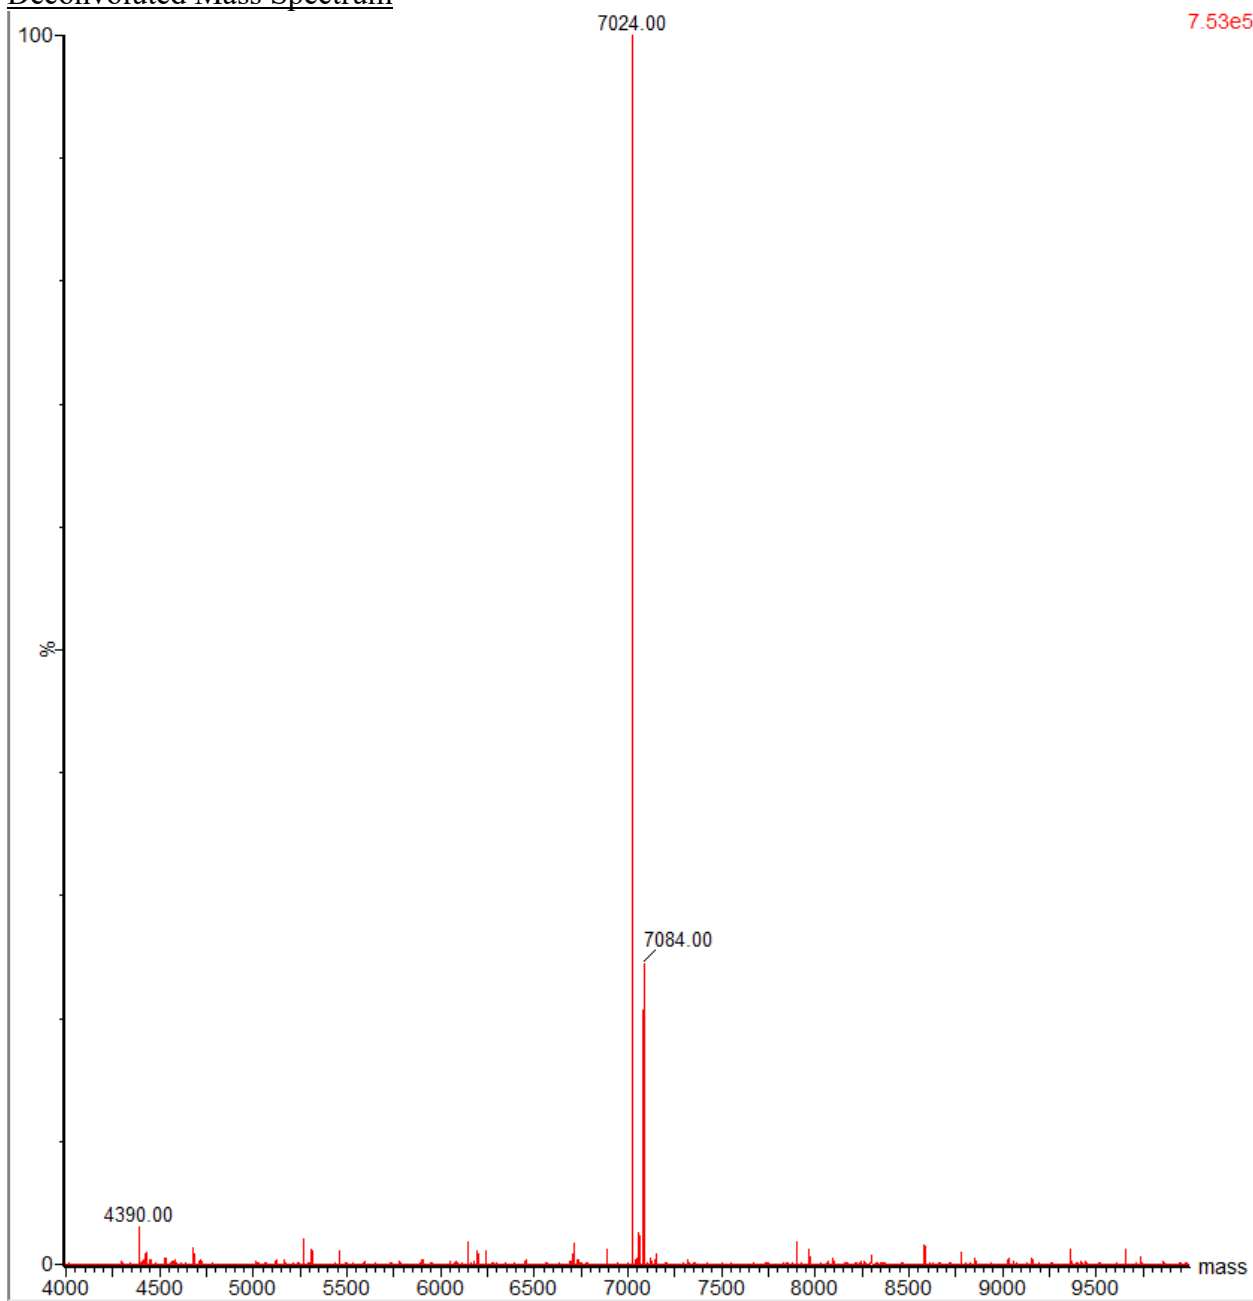

---

**Entry 1: 3'**LCMS Characterization of **4**Produced from **2** by General Procedure **2**:

Conversion (A260): 17%

Expected Mass: 7023.61

Expected (M-6)/6 Ion: 1169.60

Found Deconvoluted Mass: 7023.00

Found (M-6)/6 Ion: 1169.21

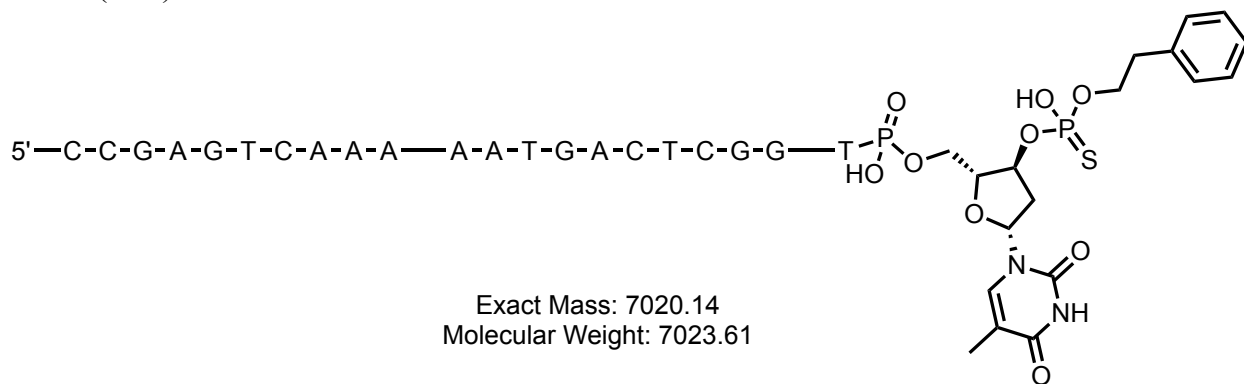**A260 Chromatogram**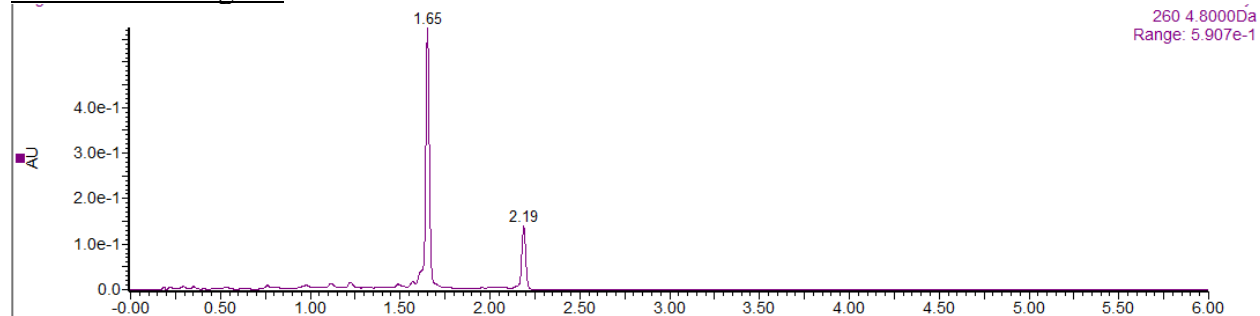

Mass Spectrum (RT= 2.19 min)

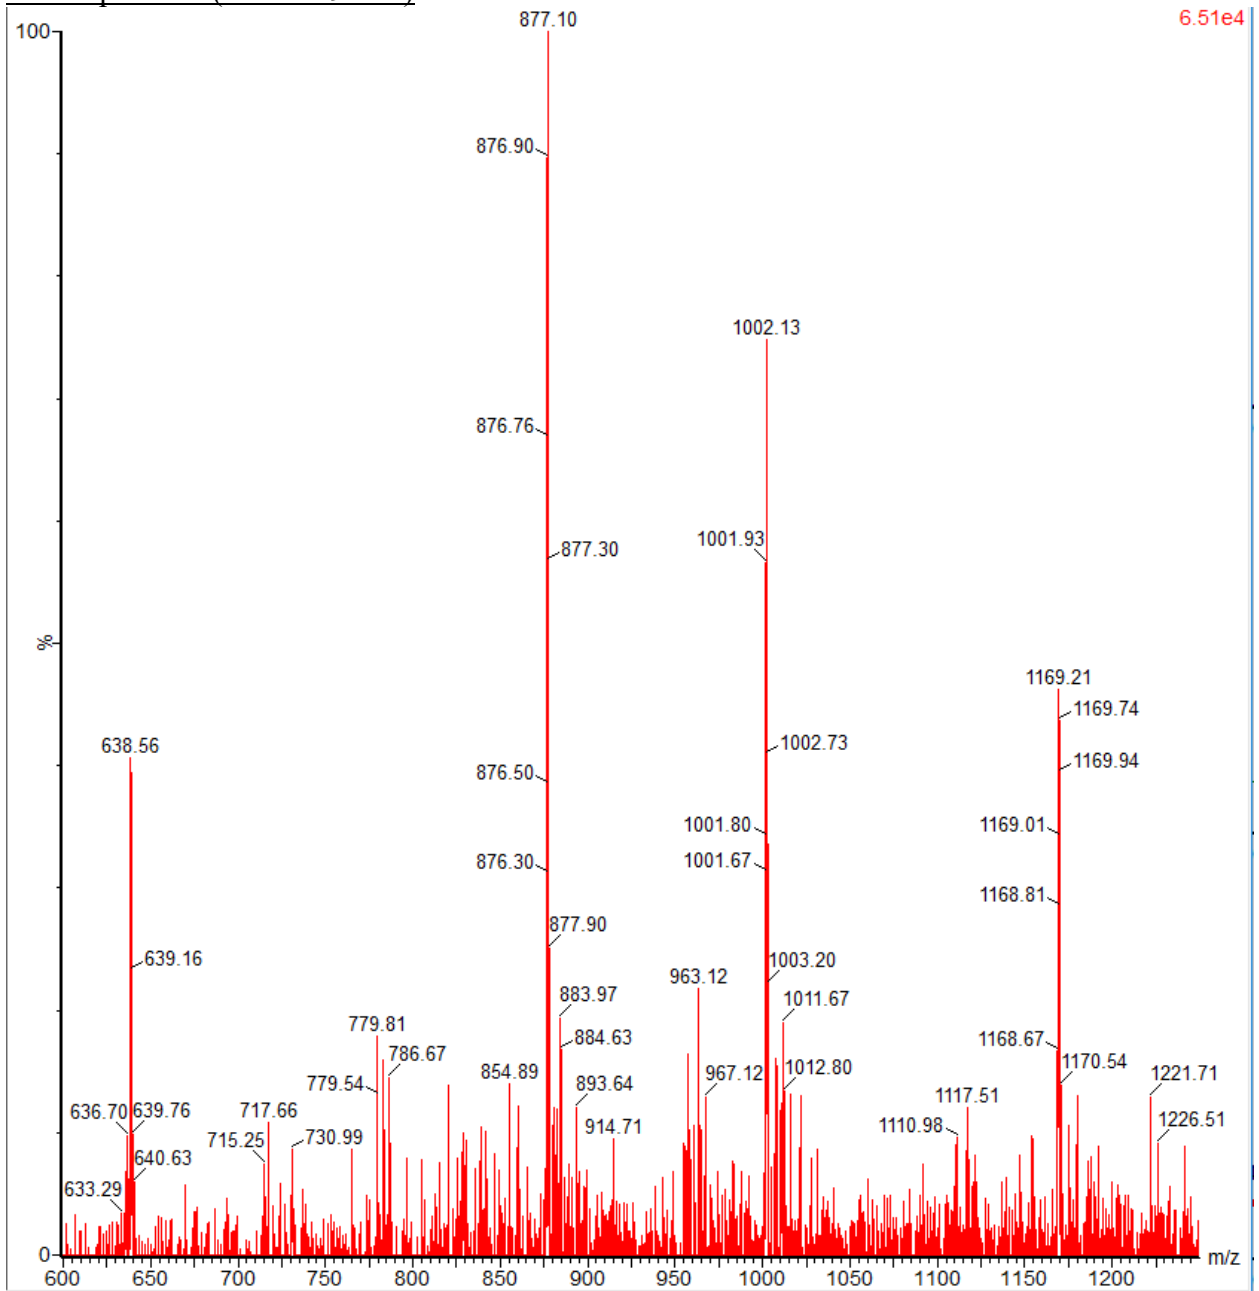

6.51e4

# Deconvoluted Mass Spectrum

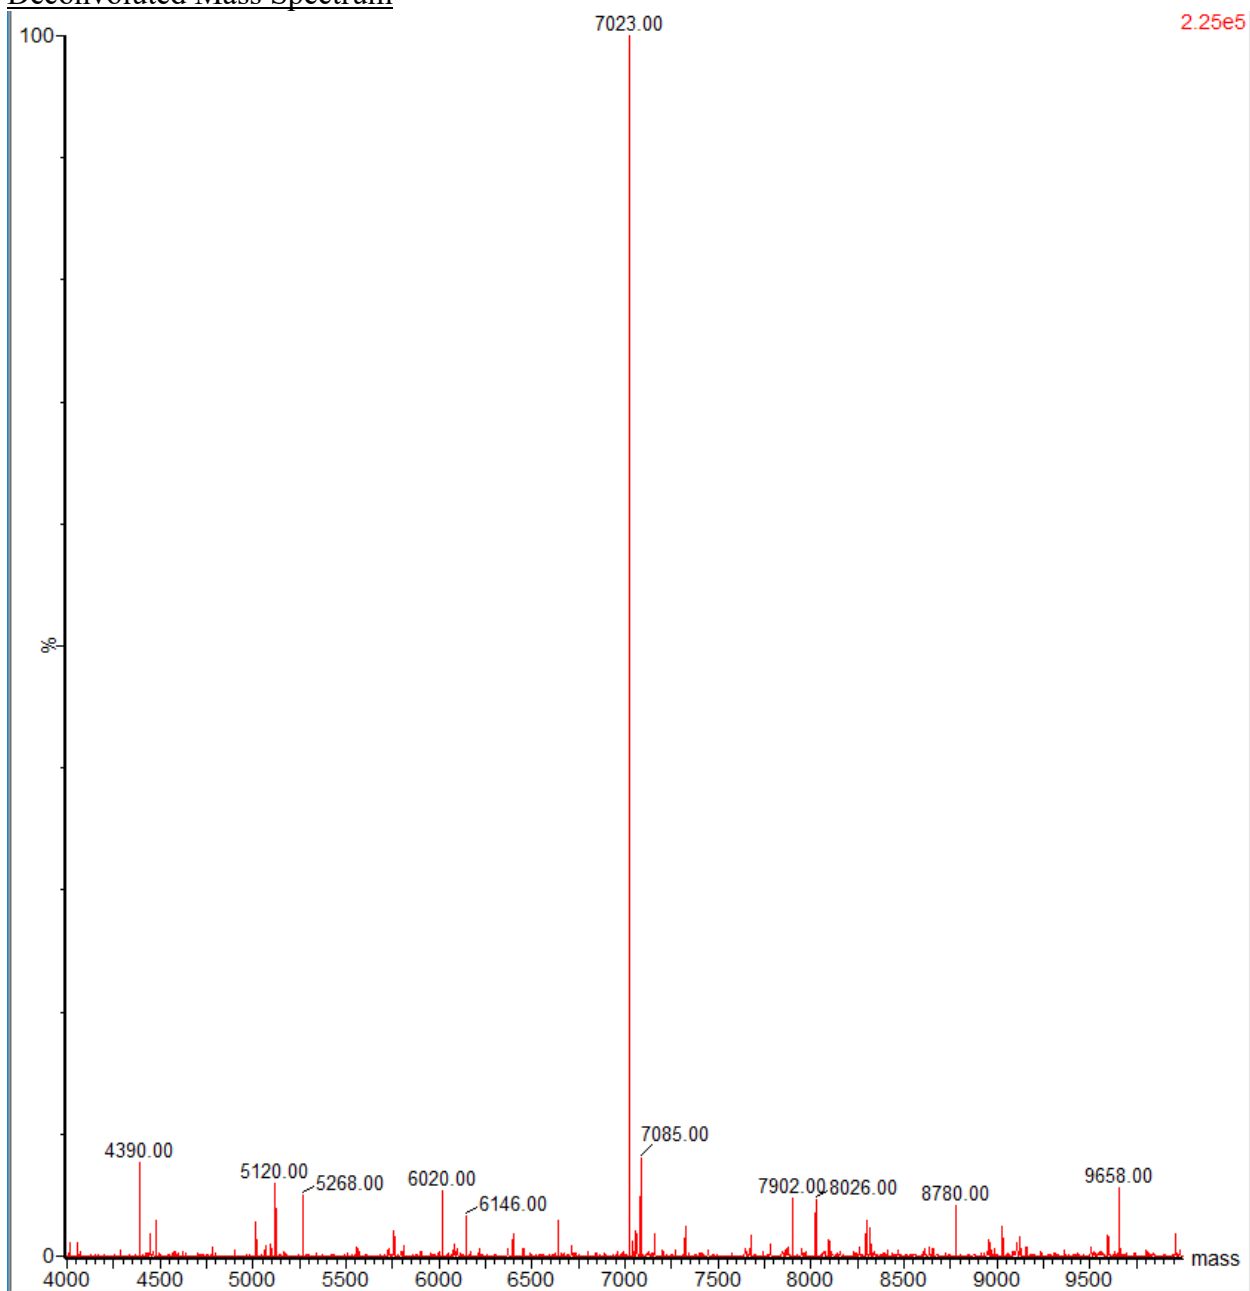

**Entry 2: 5'**

LCMS Characterization of **3**

Produced from **1** by General Procedure **2**:

Conversion (A260): 72%

Expected Mass: 7023.61

Expected (M-6)/6 Ion: 1169.60

Found Deconvoluted Mass: 7023.00

Found (M-6)/6 Ion: 1169.54

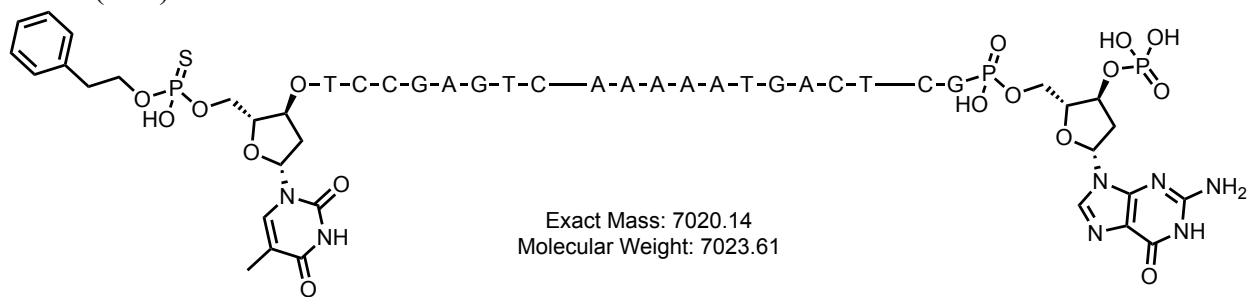

A260 Chromatogram

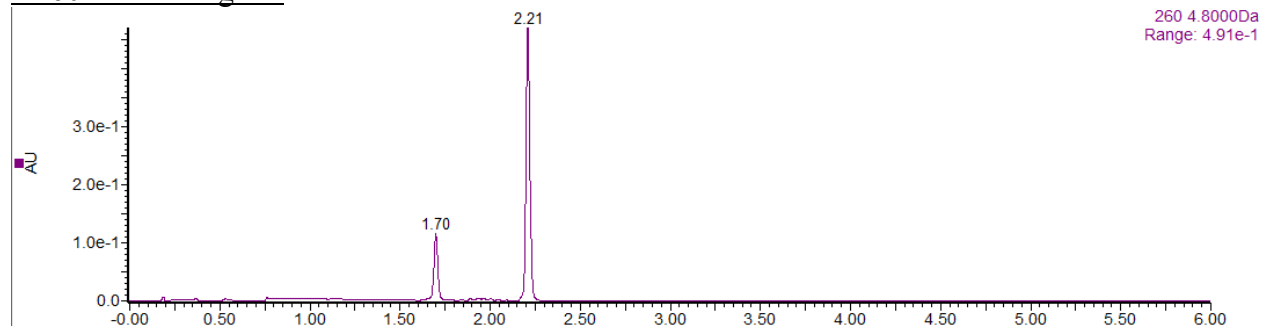

Mass Spectrum (RT= 2.21 min)

1.93e5

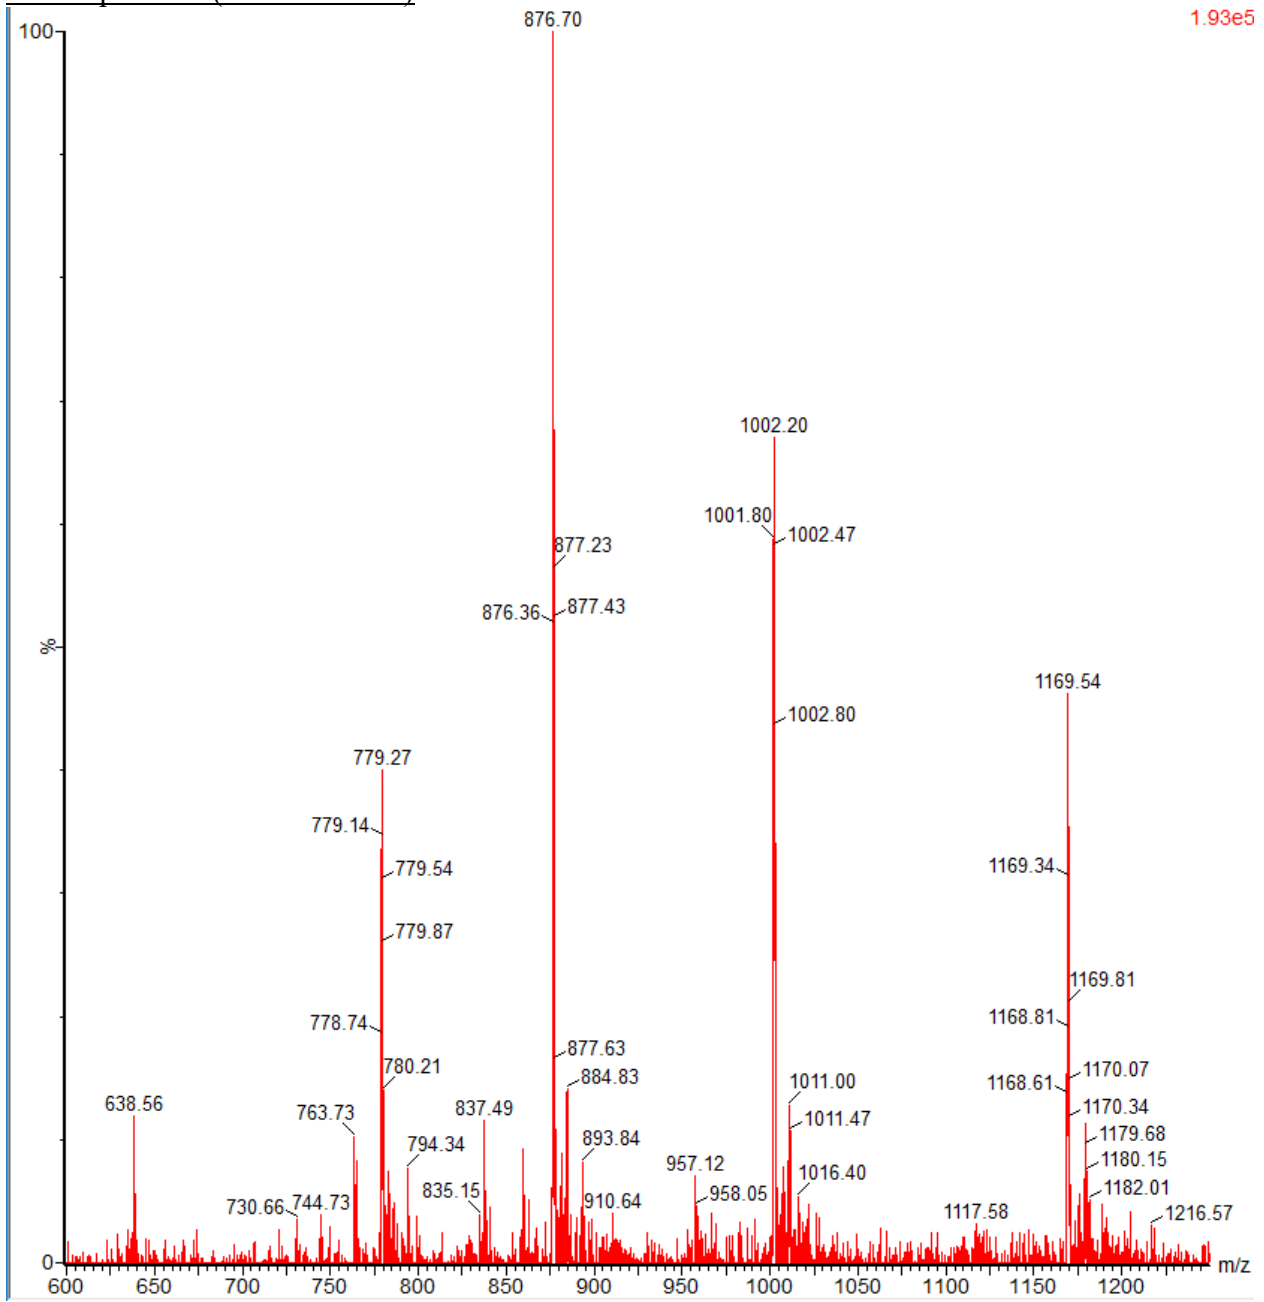

# Deconvoluted Mass Spectrum

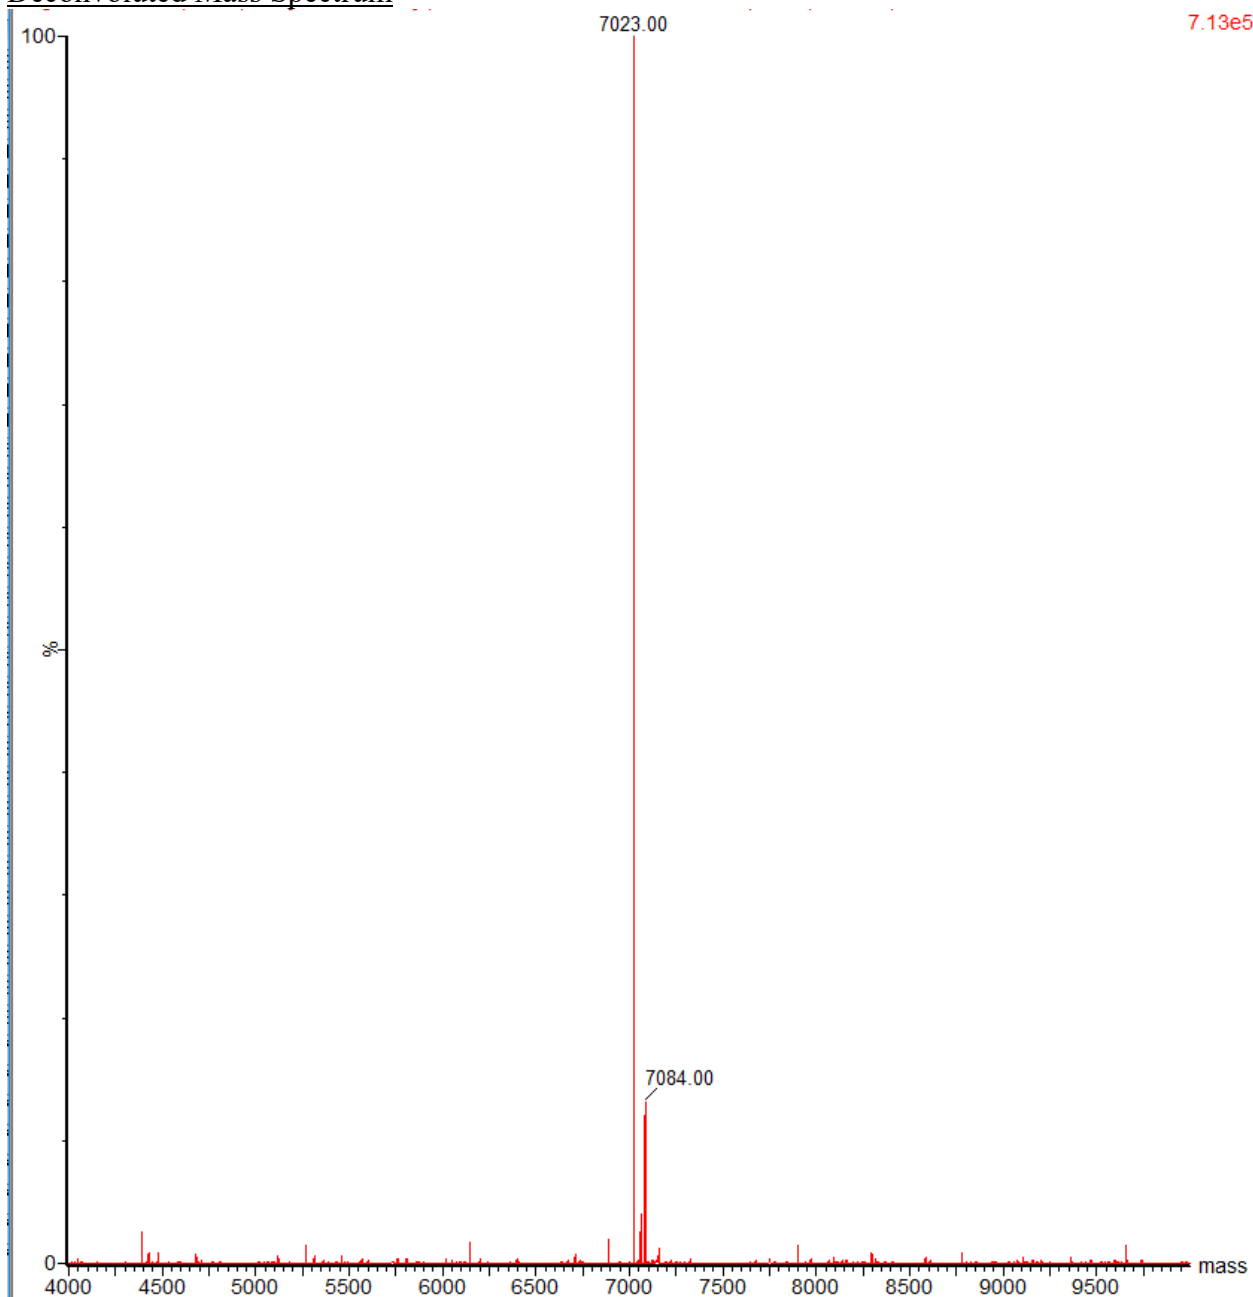



---

**Entry 2: 3'**LCMS Characterization of **4**Produced from **2** by General Procedure **2**:

Conversion (A260): 51%

Expected Mass: 7023.61

Expected (M-6)/6 Ion: 1169.60

Found Deconvoluted Mass: 7024.00

Found (M-6)/6 Ion: 1169.41

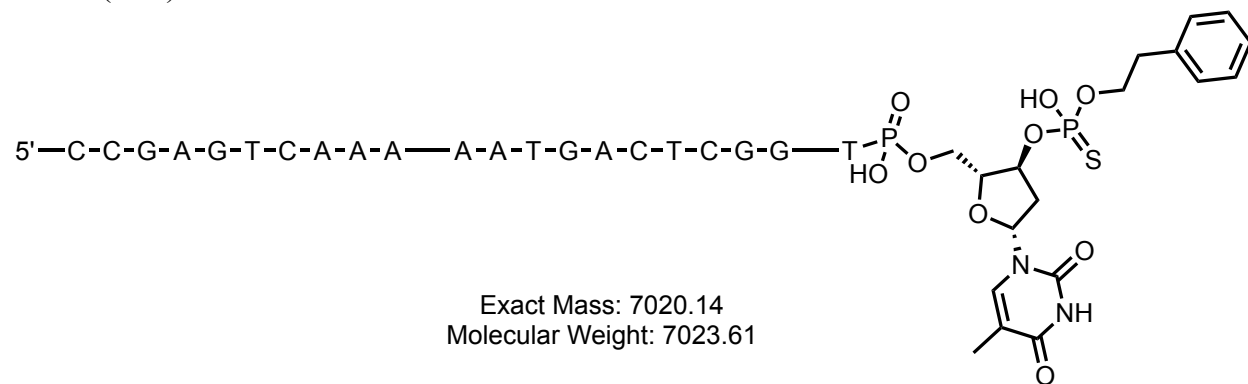A260 Chromatogram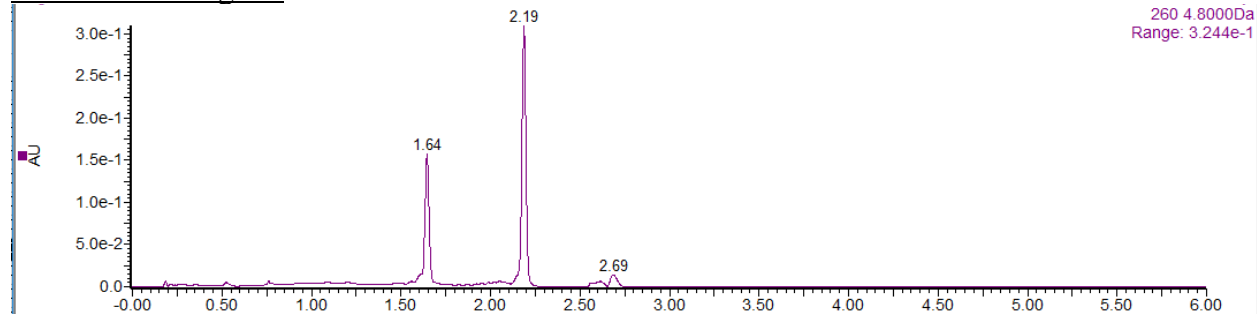

Mass Spectrum (RT= 2.19 min)

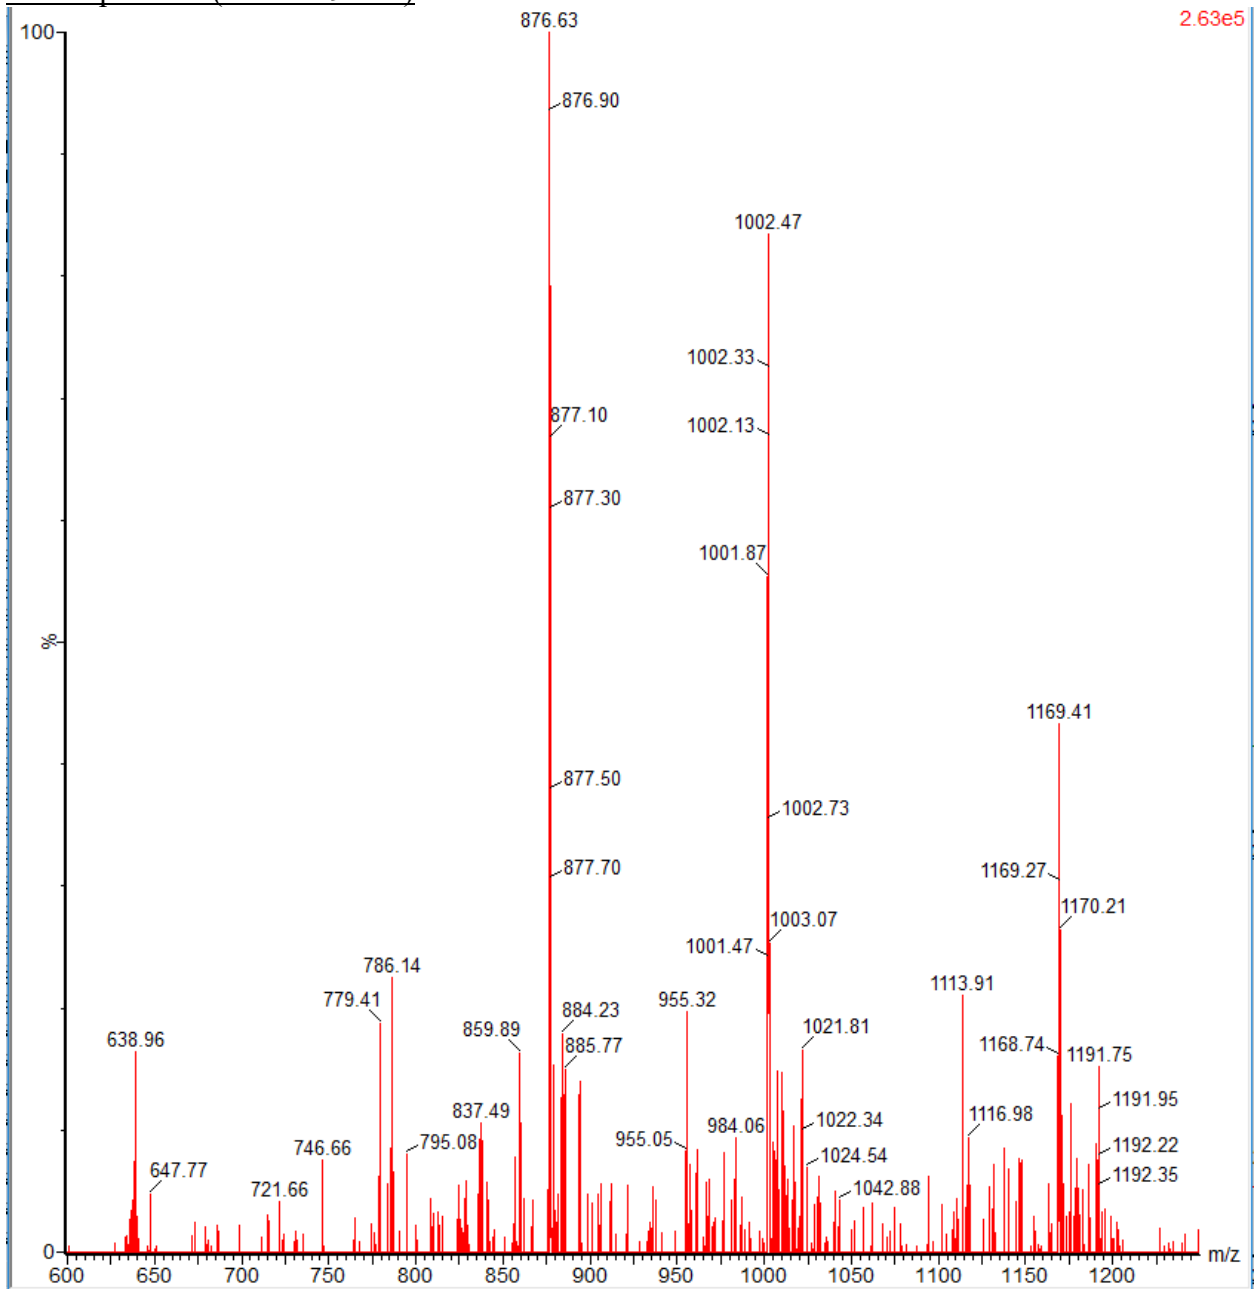

2.63e5

# Deconvoluted Mass Spectrum

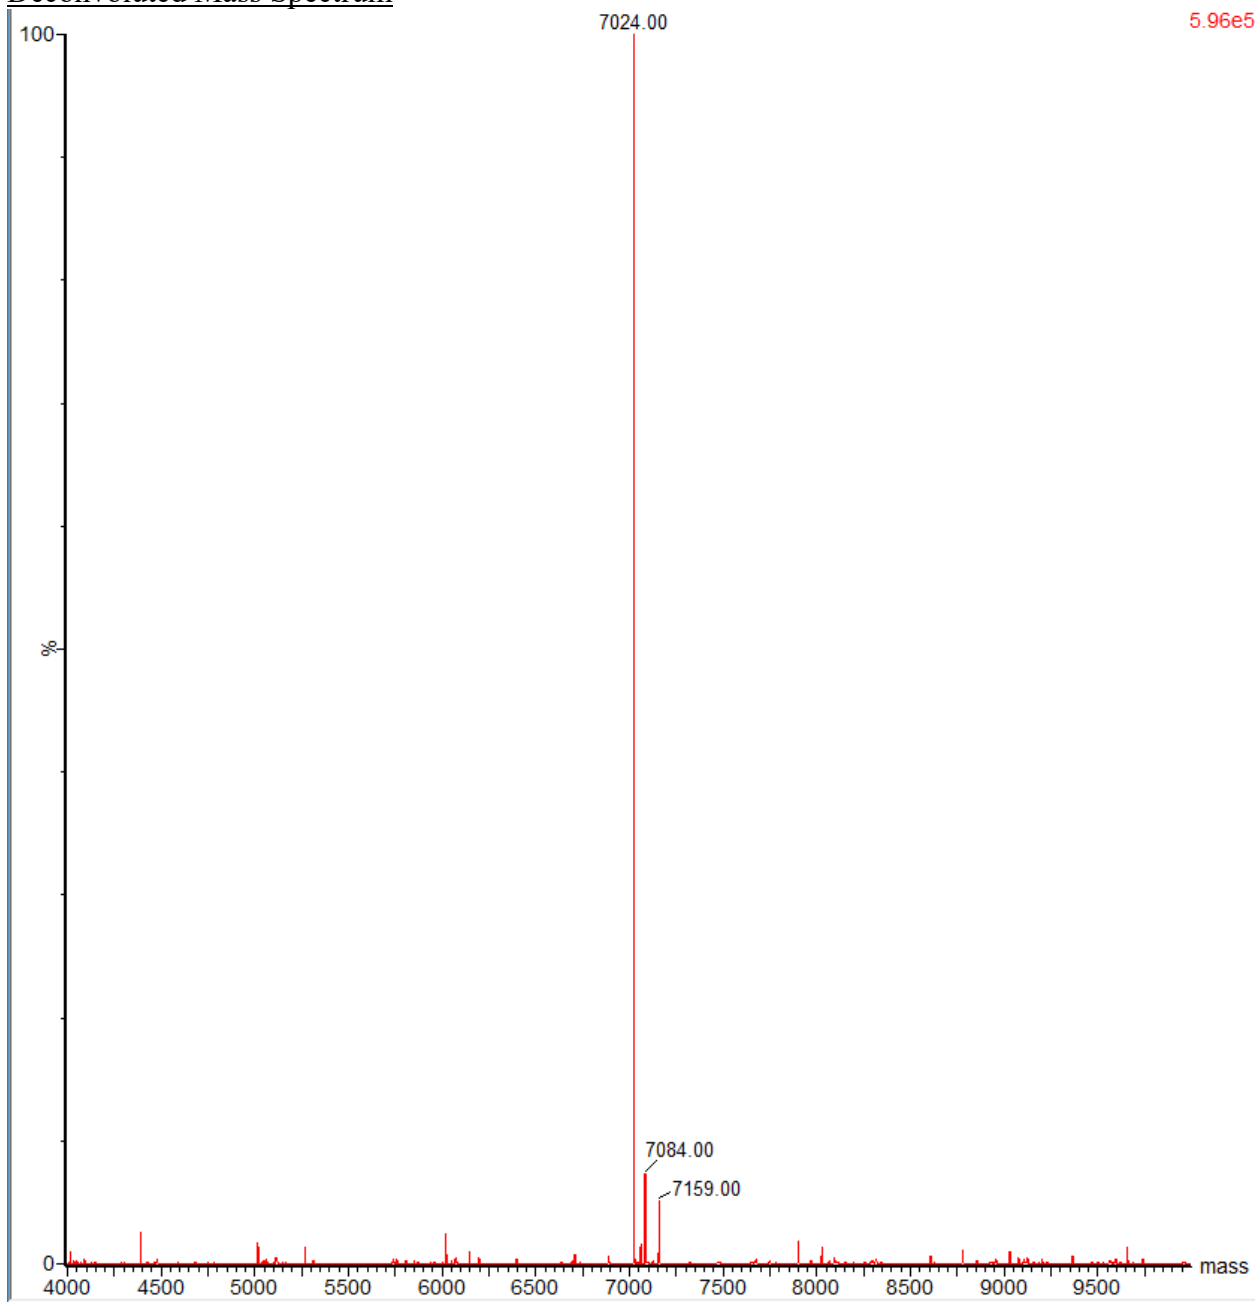

### Entry 3: 5'

LCMS Characterization of **3**

Produced from **1** by General Procedure **2**:

Conversion (A260): 91%

Expected Mass: 7023.61

Expected (M-6)/6 Ion: 1169.60

Found Deconvoluted Mass: 7024.00

Found (M-6)/6 Ion: 1169.61



### A260 Chromatogram

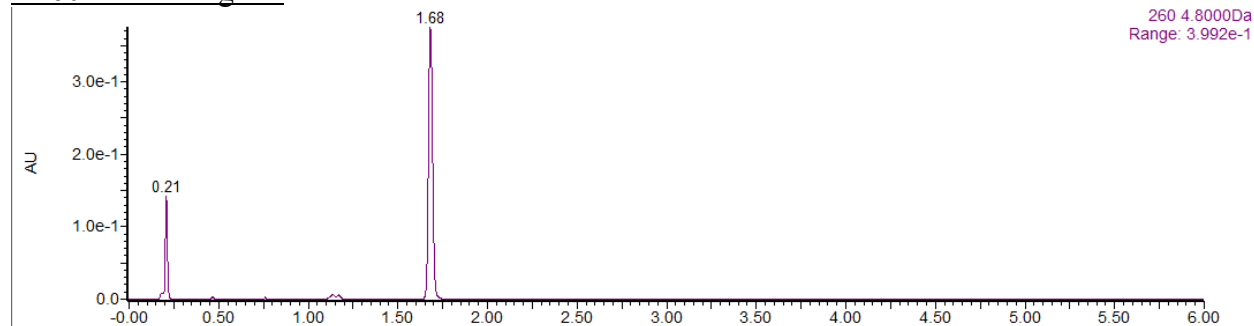

Mass Spectrum (RT= 1.68 min)

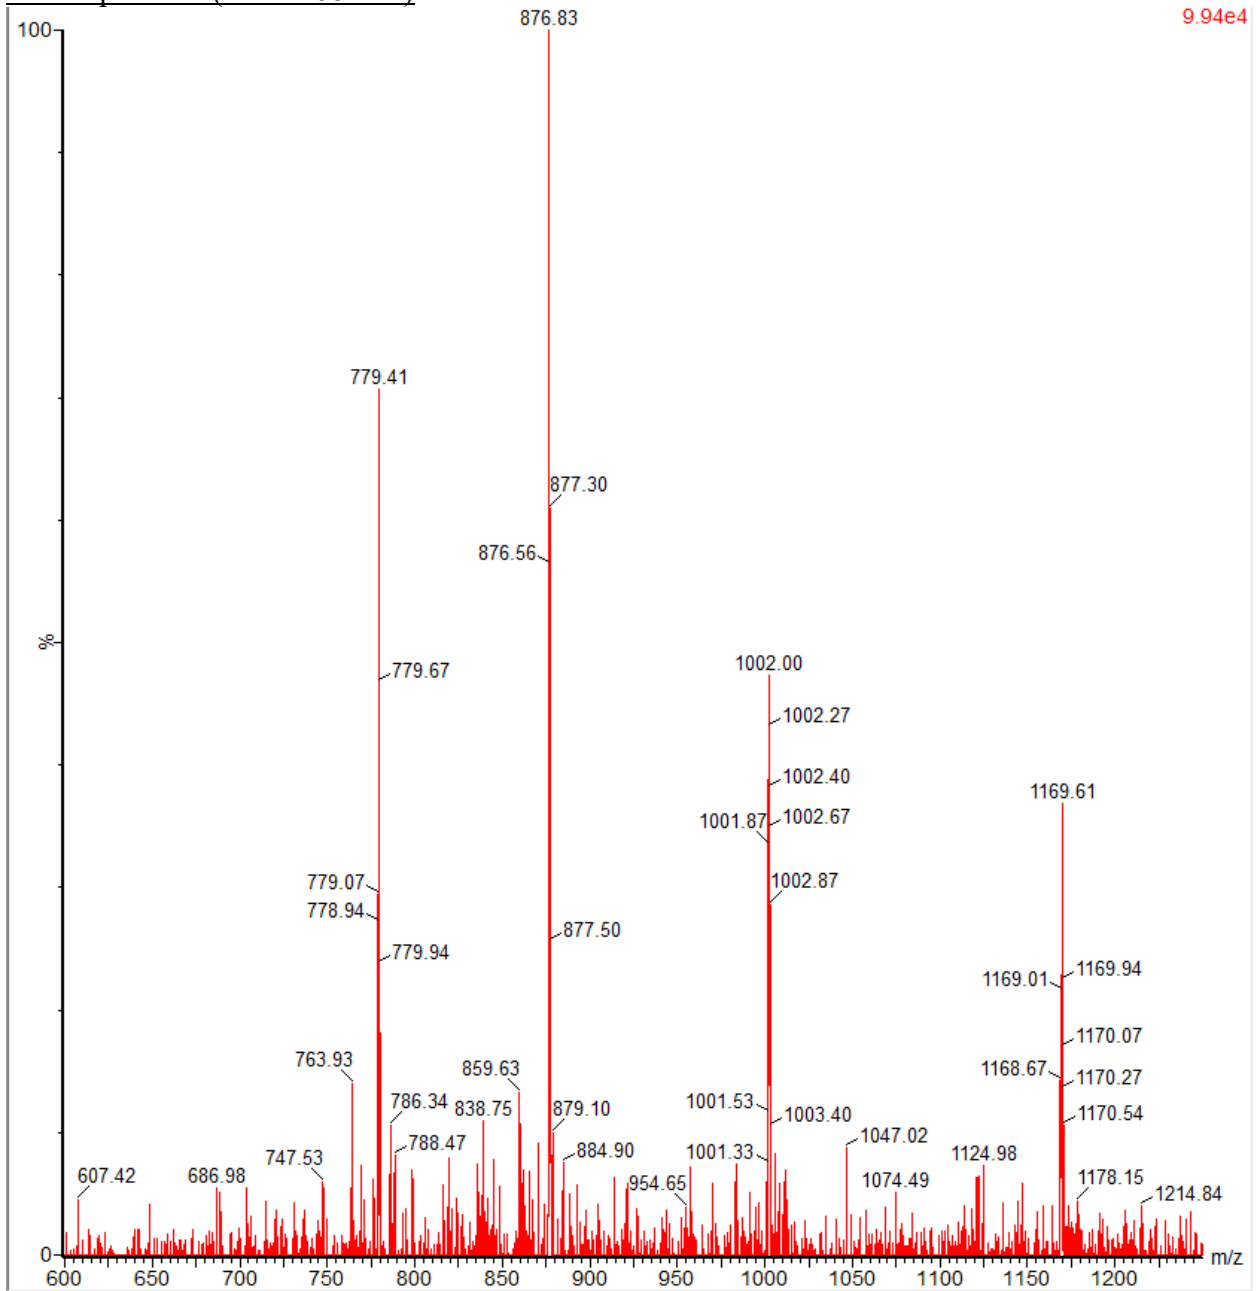

9.94e4

# Deconvoluted Mass Spectrum

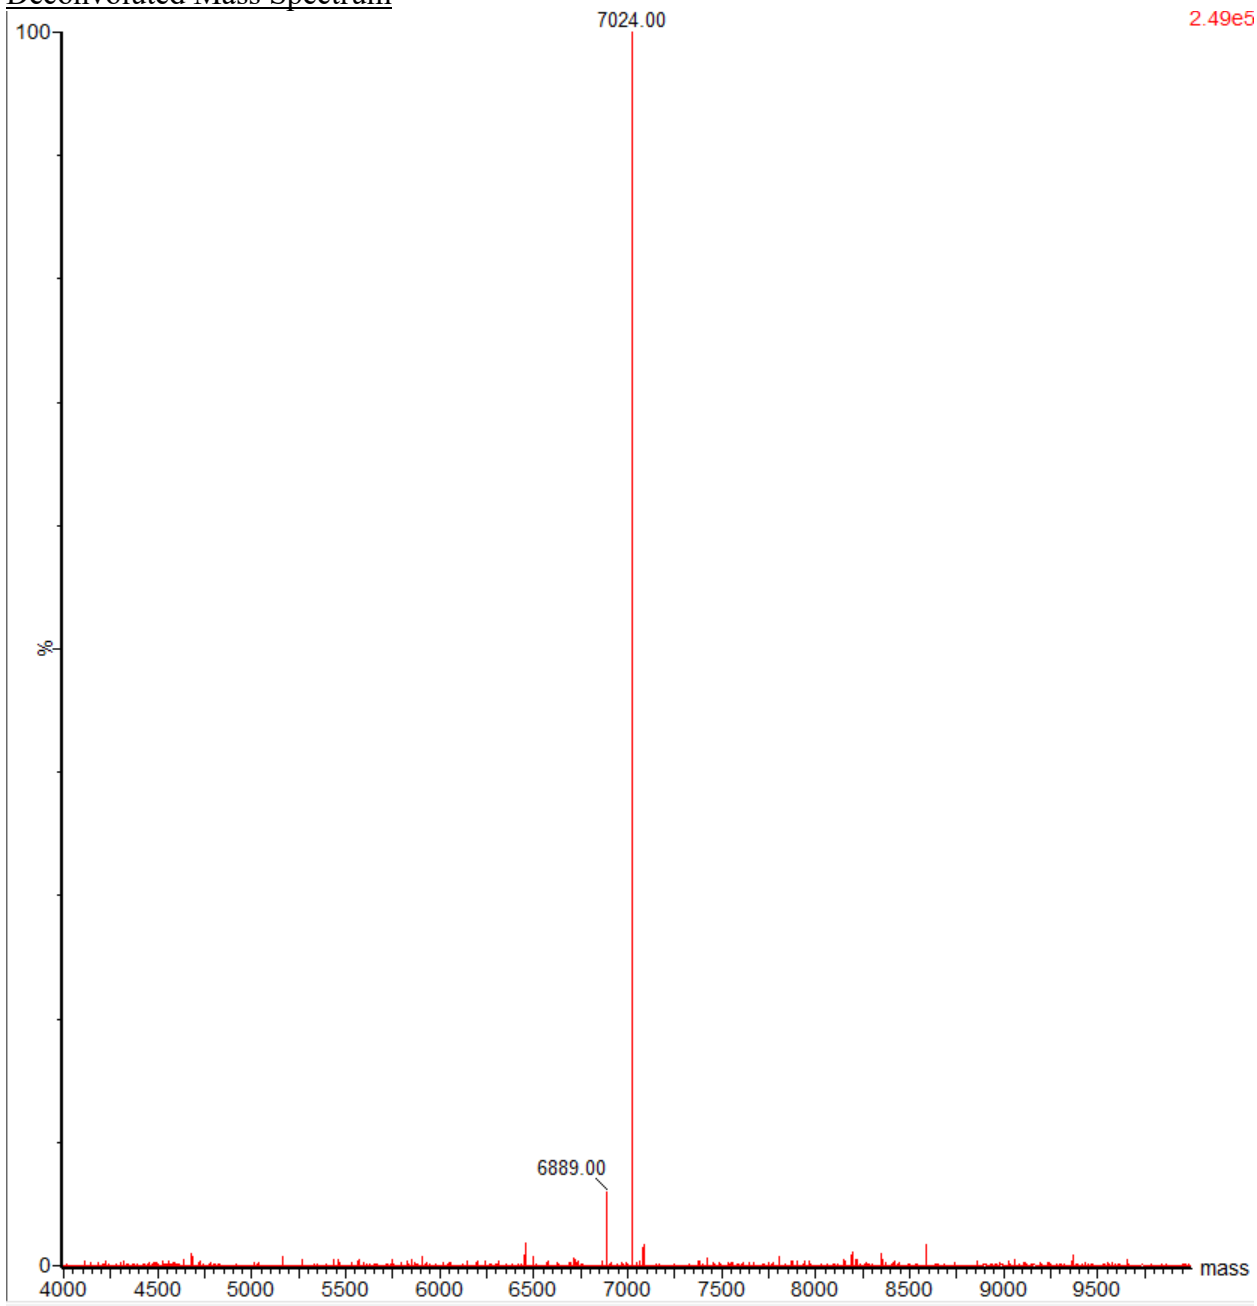

---

**Entry 3: 3'**LCMS Characterization of **4**Produced from **2** by General Procedure **2**:

Conversion (A260): 72%

Expected Mass: 7023.61

Expected (M-6)/6 Ion: 1169.60

Found Deconvoluted Mass: 7024.00

Found (M-6)/6 Ion: 1169.01

**A260 Chromatogram**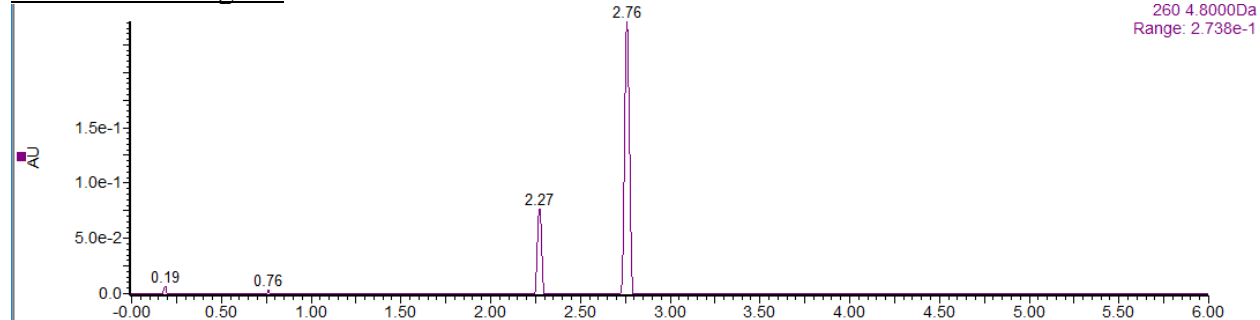

Mass Spectrum (RT= 2.76 min)

7.59e5

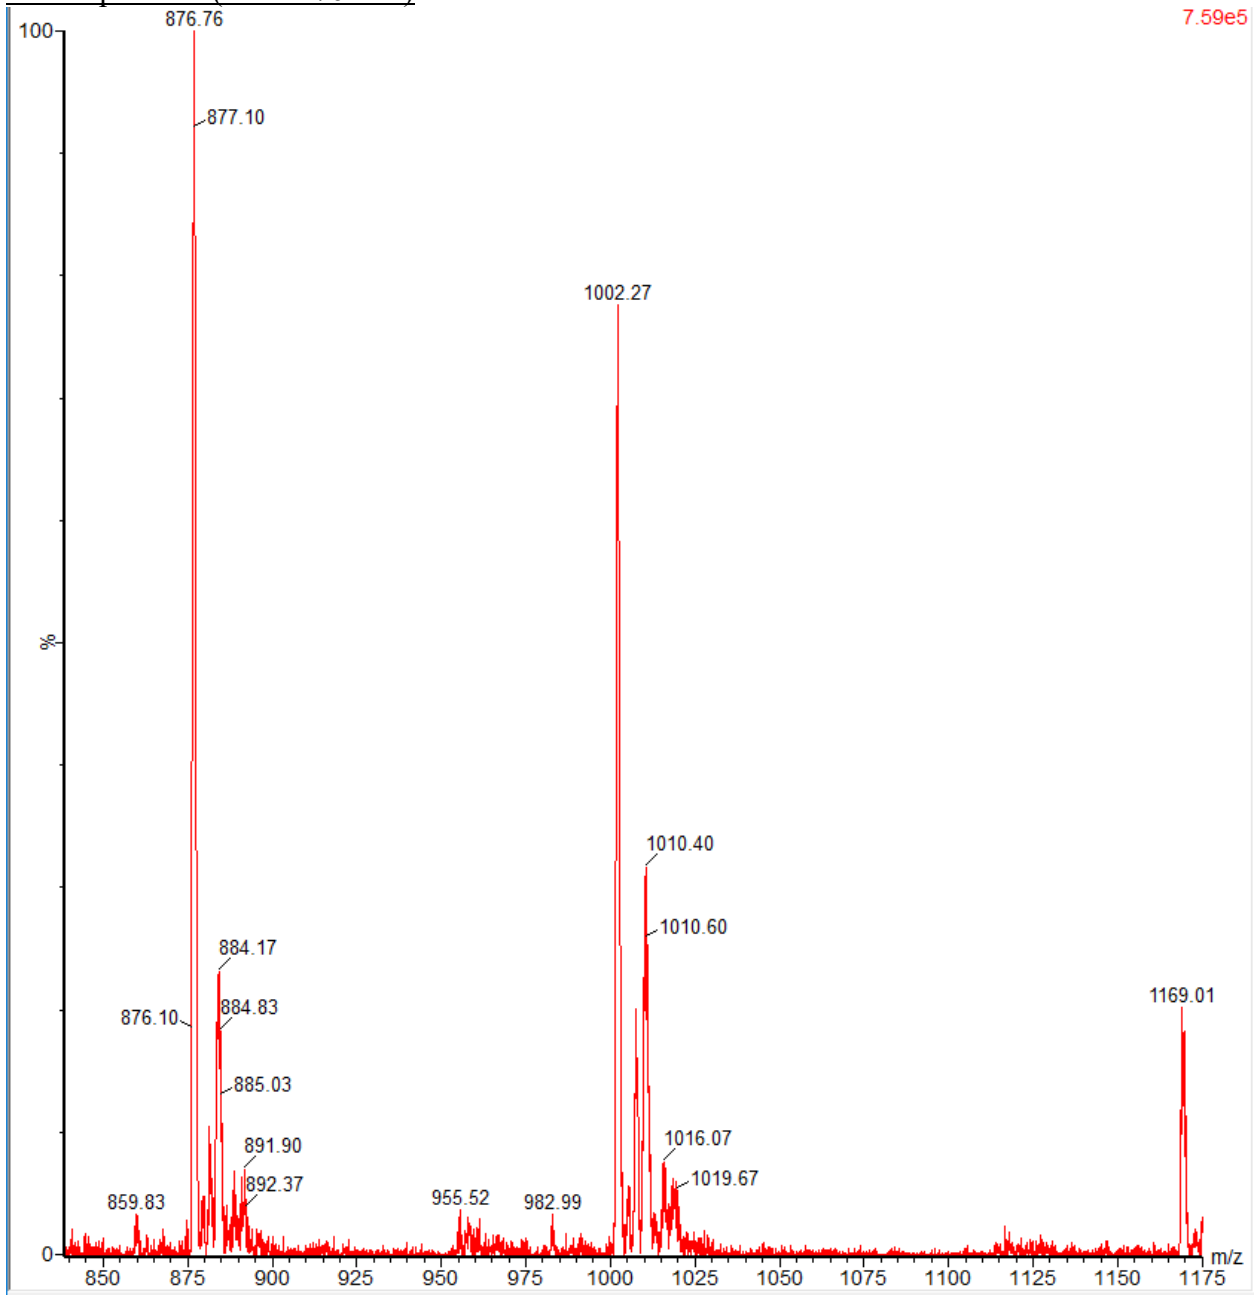



# Deconvoluted Mass Spectrum

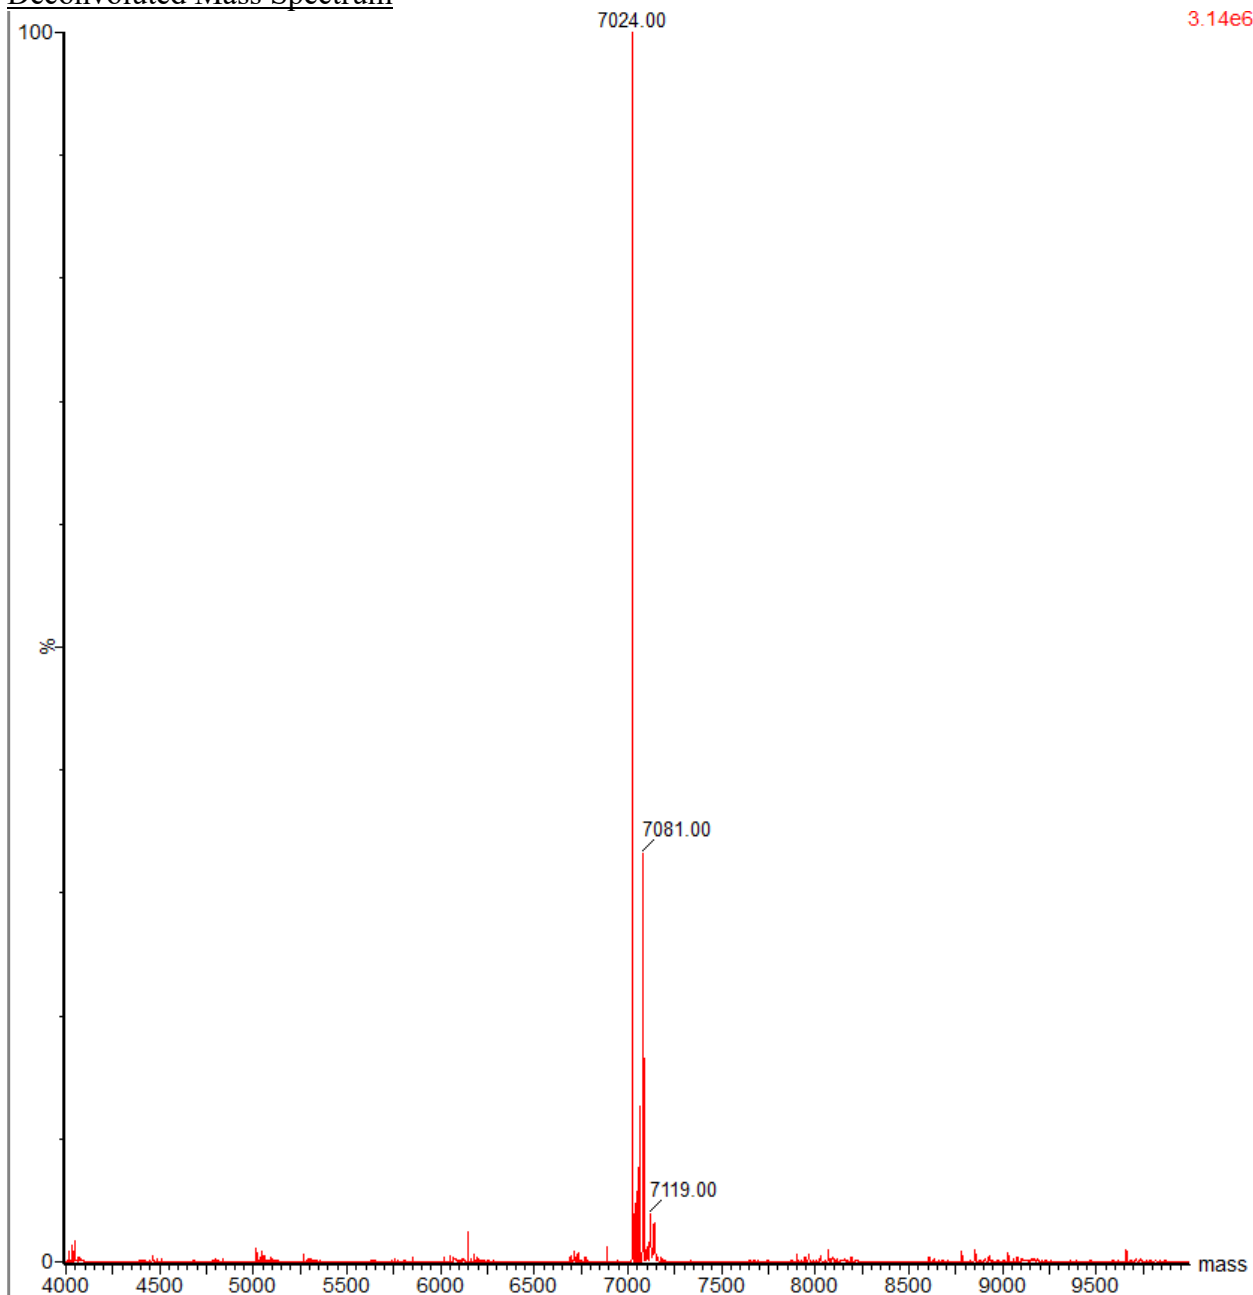

**Entry 4: 5'**

LCMS Characterization of **3**

Produced from **1** by General Procedure **2**:

Conversion (A260): 84%

Expected Mass: 7023.61

Expected (M-6)/6 Ion: 1169.60

Found Deconvoluted Mass: 7023.00

Found (M-6)/6 Ion: 1169.61

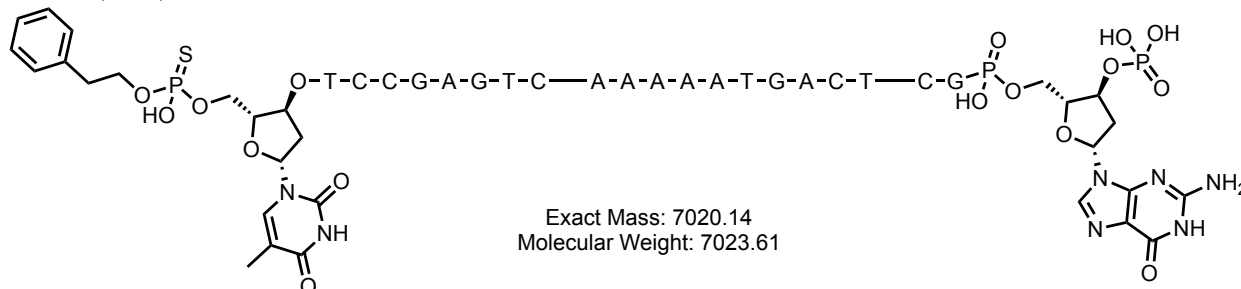

**A260 Chromatogram**

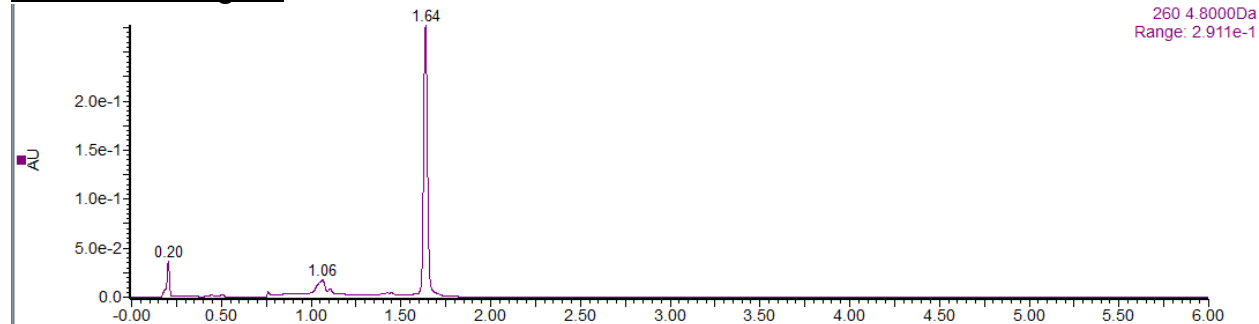

Mass Spectrum (RT= 1.64 min)

4.75e4

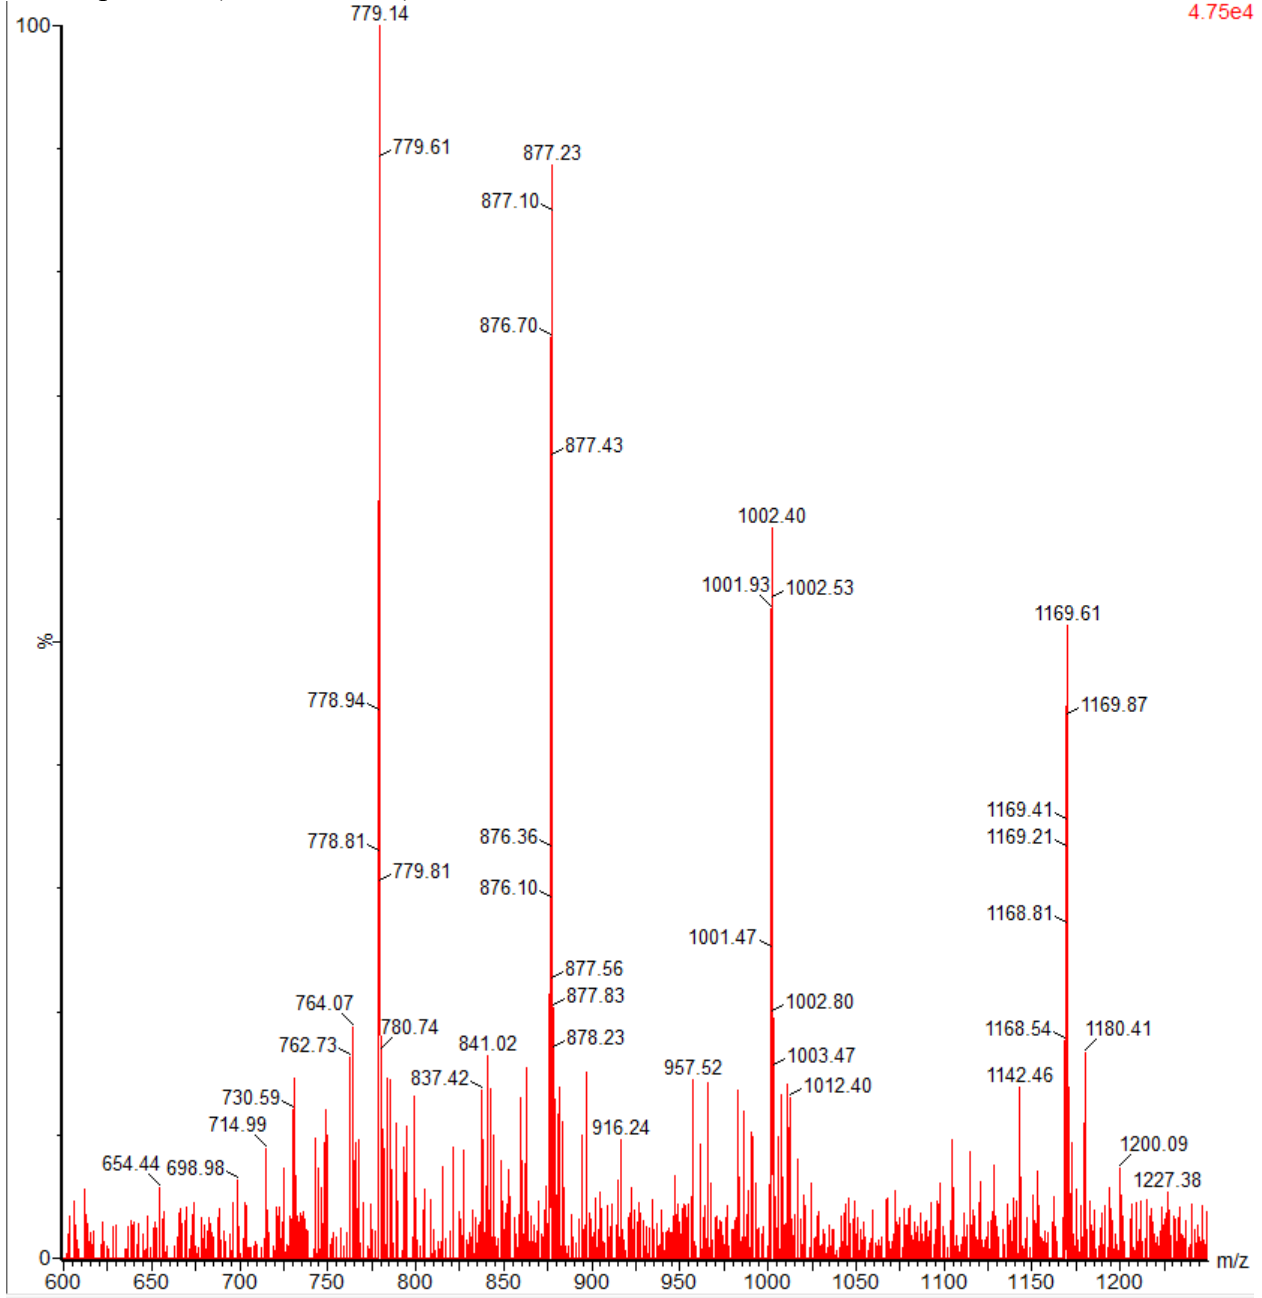

# Deconvoluted Mass Spectrum

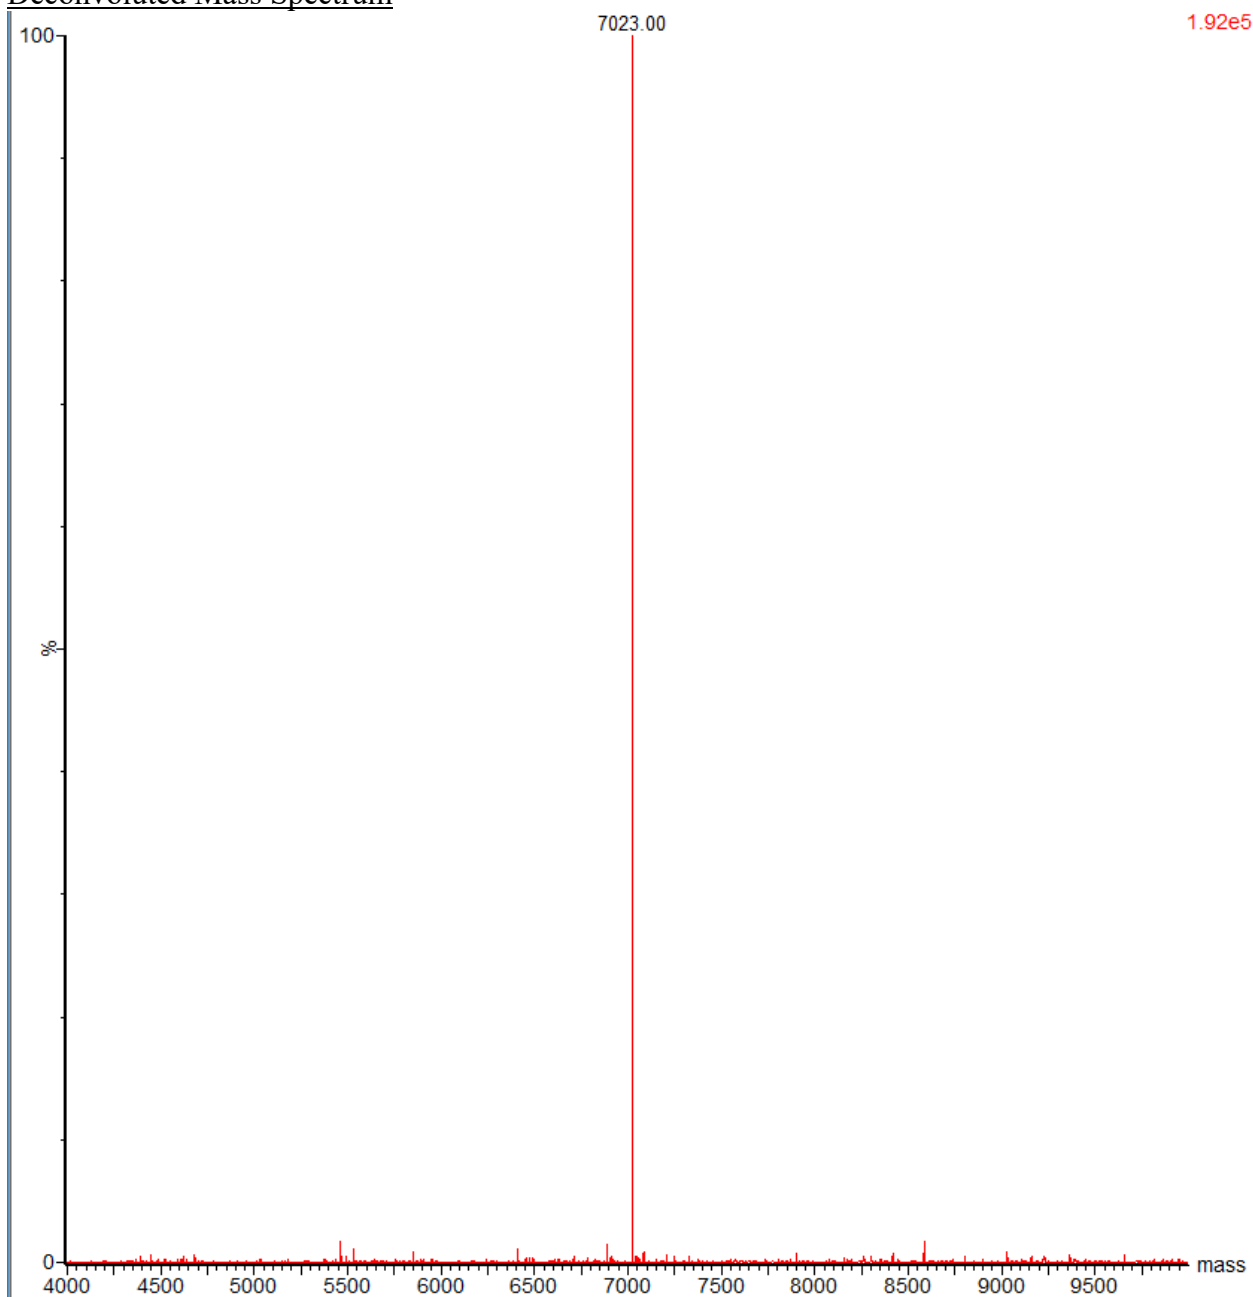

**Entry 4: 3'**

LCMS Characterization of **4**

Produced from **2** by General Procedure **2**:

Conversion (A260): 62%

Expected Mass: 7023.61

Expected (M-6)/6 Ion: 1169.60

Found Deconvoluted Mass: 7023.00

Found (M-6)/6 Ion: 1169.54



A260 Chromatogram

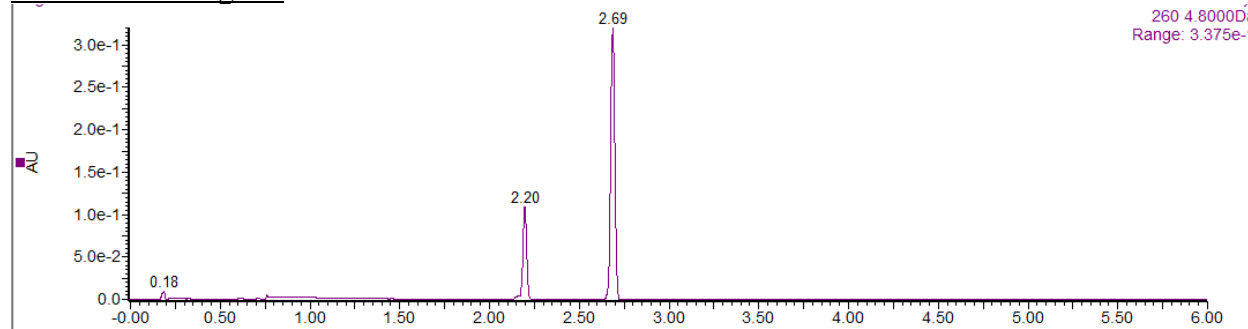

Mass Spectrum (RT= 2.69 min)

2.38e6

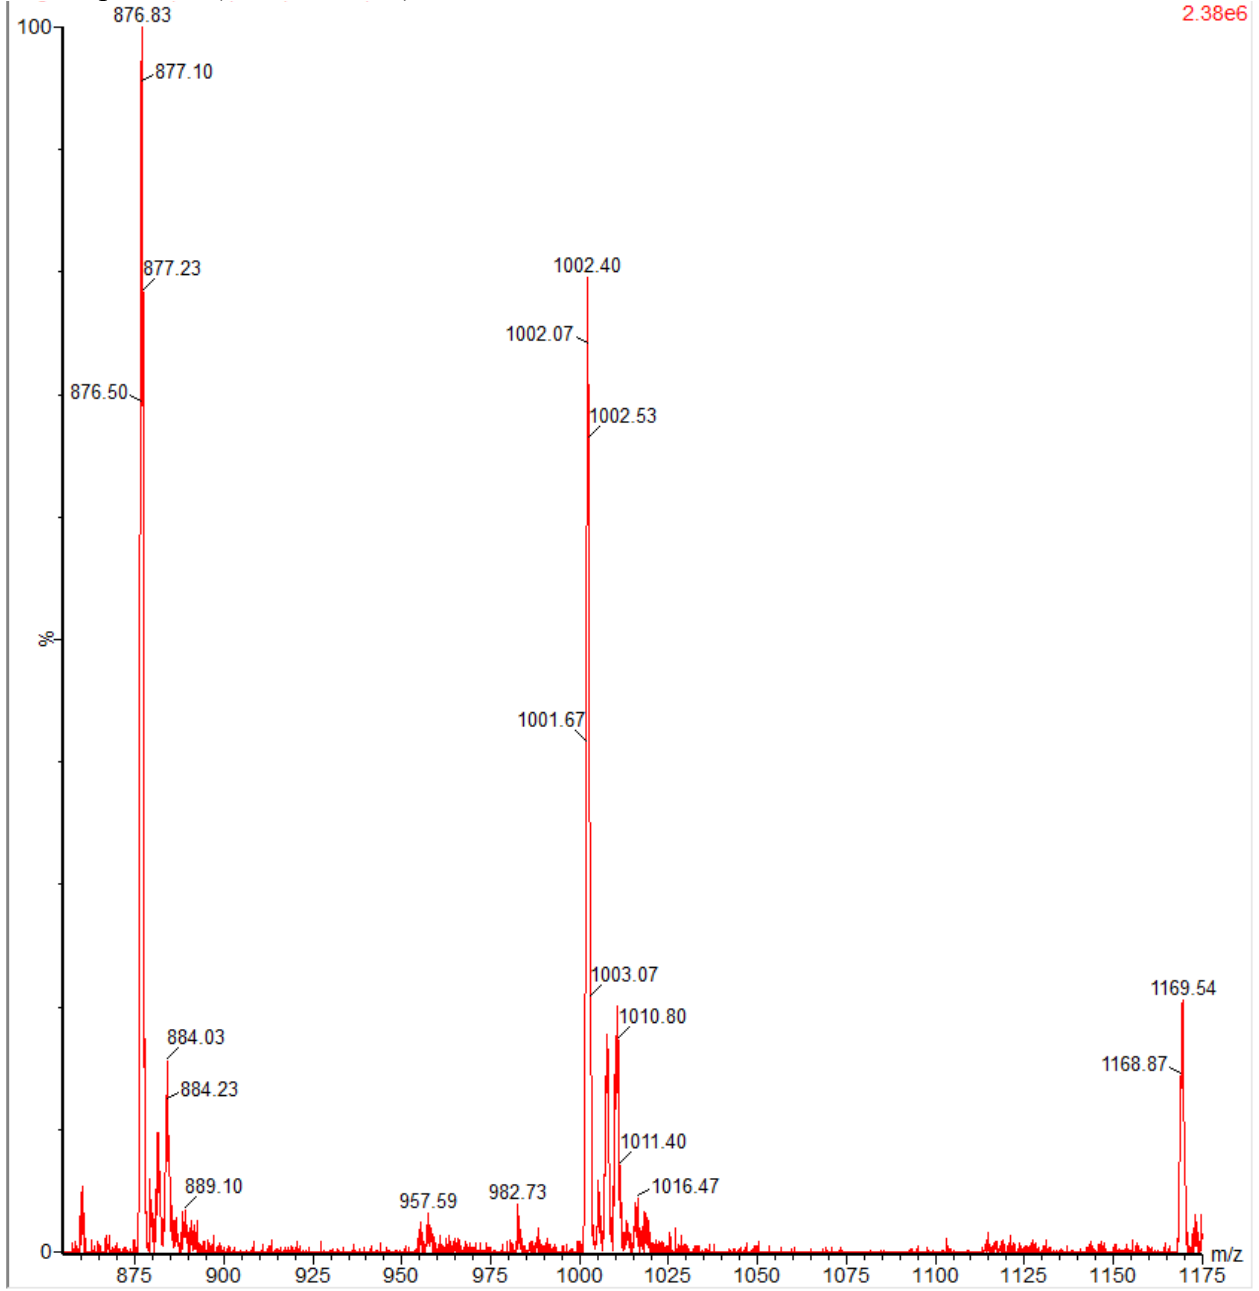

# Deconvoluted Mass Spectrum

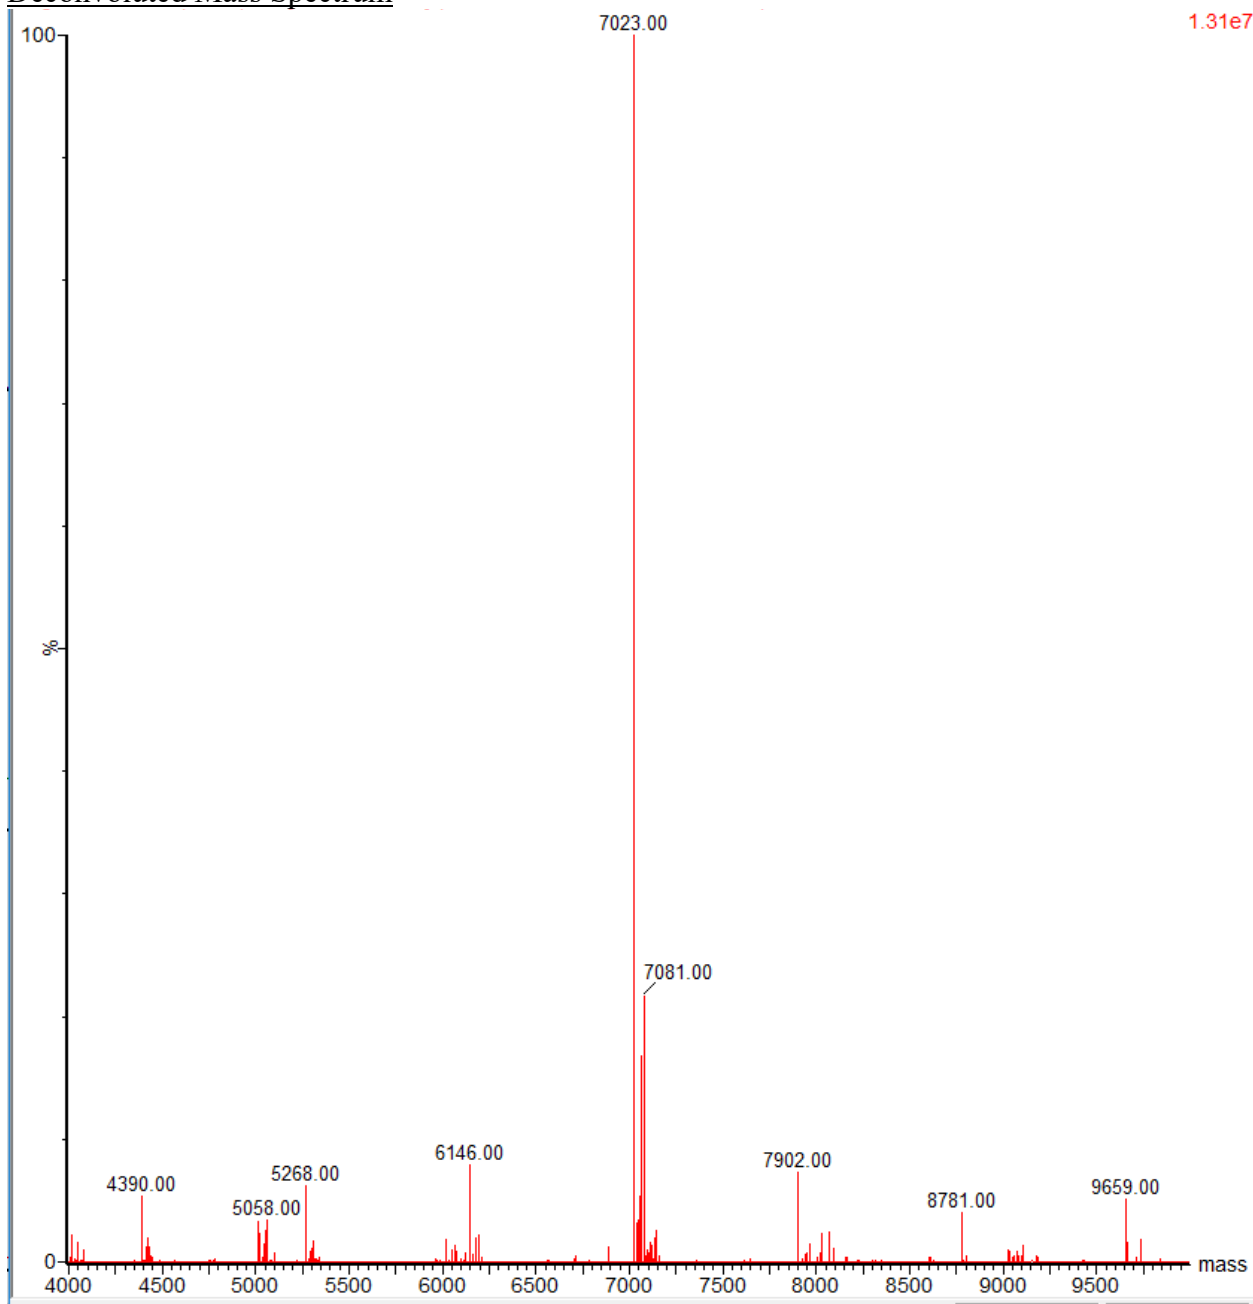

**Entry 5: 5'**

LCMS Characterization of **3**

Produced from **1** by General Procedure **2**:

Conversion (A260): 0%

Expected Mass: 7023.61

Expected (M-6)/6 Ion: 1169.60

Found Deconvoluted Mass: 6824.00 (Starting material **1**)

Found (M-6)/6 Ion: 1135.99 (Starting material **1**)

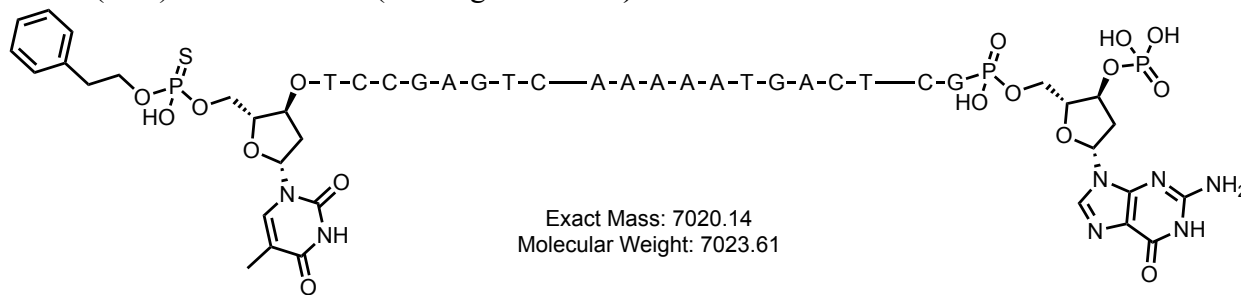

**A260 Chromatogram**

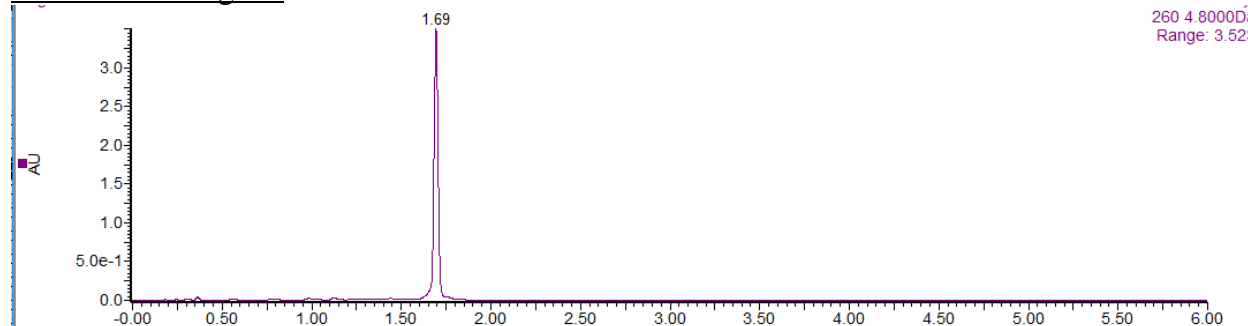



Mass Spectrum (RT= 1.69 min)

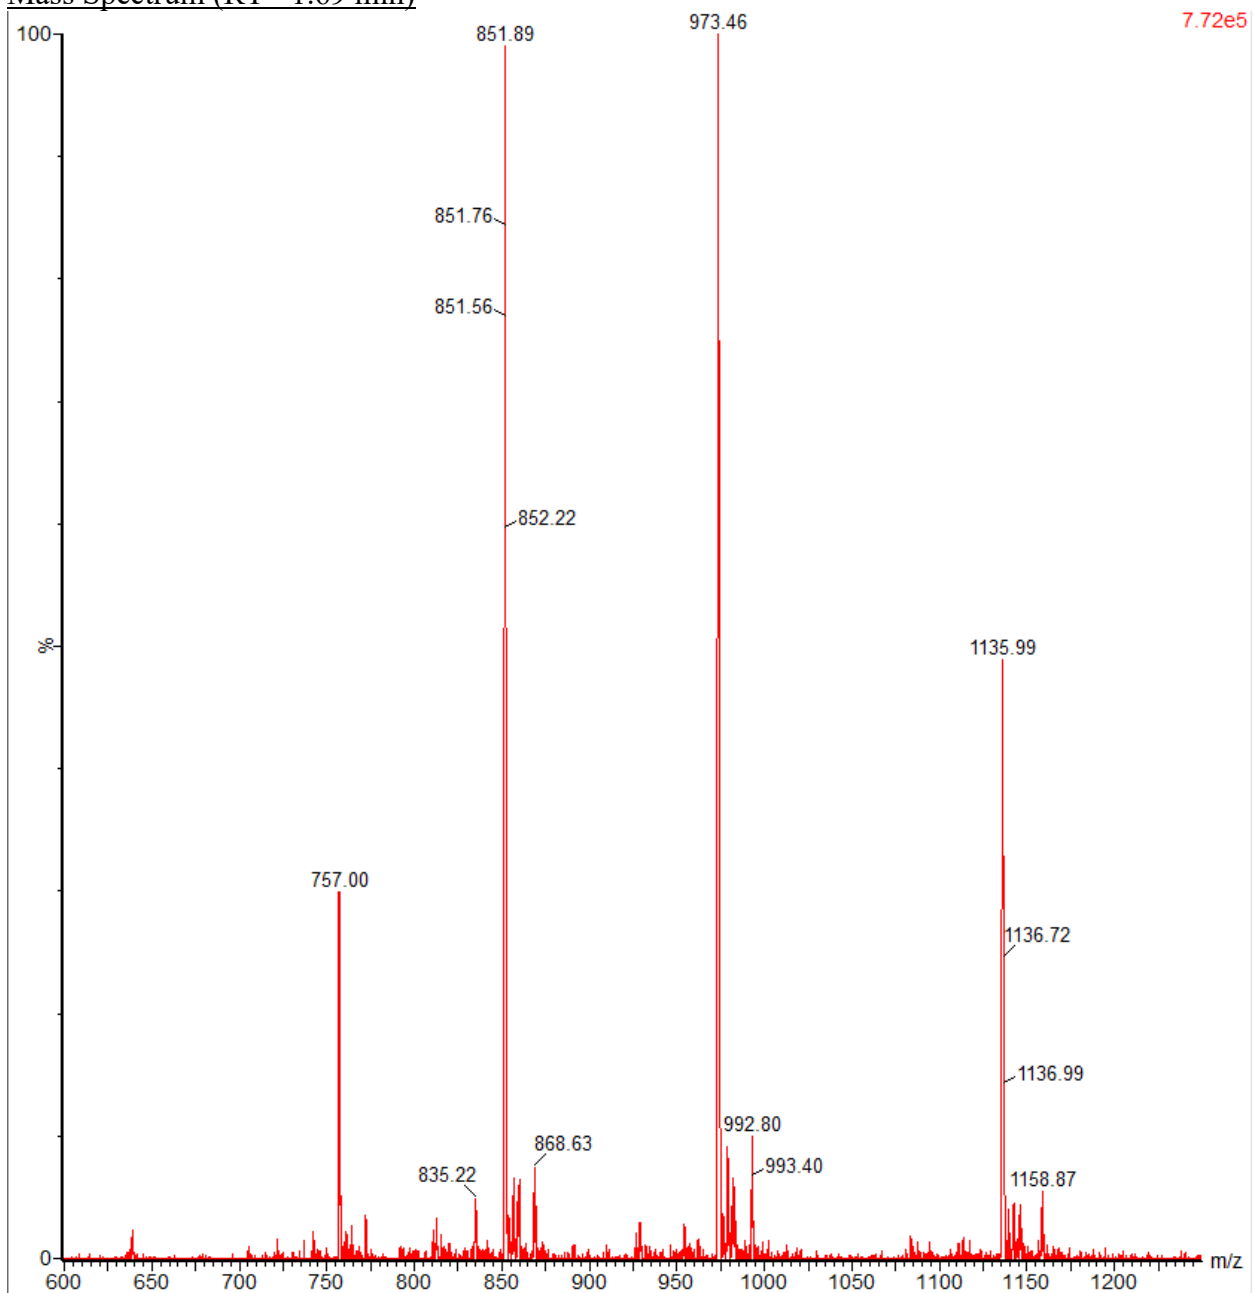

# Deconvoluted Mass Spectrum

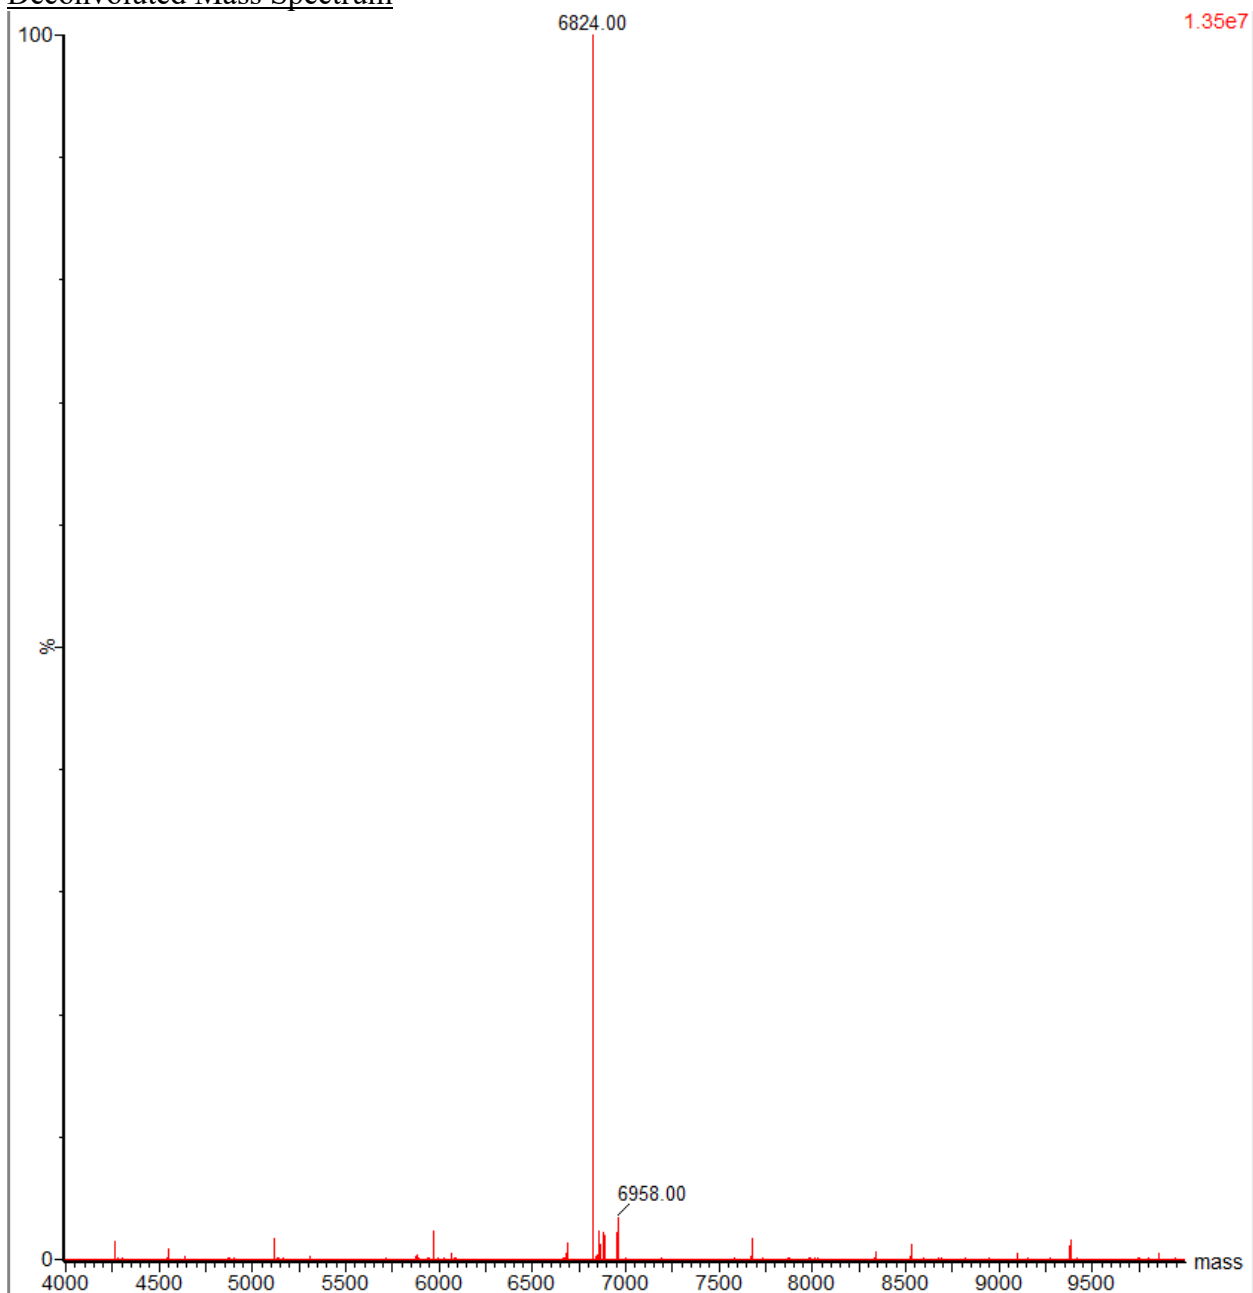

**Entry 5: 3'**

LCMS Characterization of **4**

Produced from **2** by General Procedure **2**:

Conversion (A260): 0%

Expected Mass: 7023.61

Expected (M-6)/6 Ion: 1169.60

Found Deconvoluted Mass: 6824.00 (Starting material **2**)

Found (M-6)/6 Ion: 1136.12(Starting material **2**)

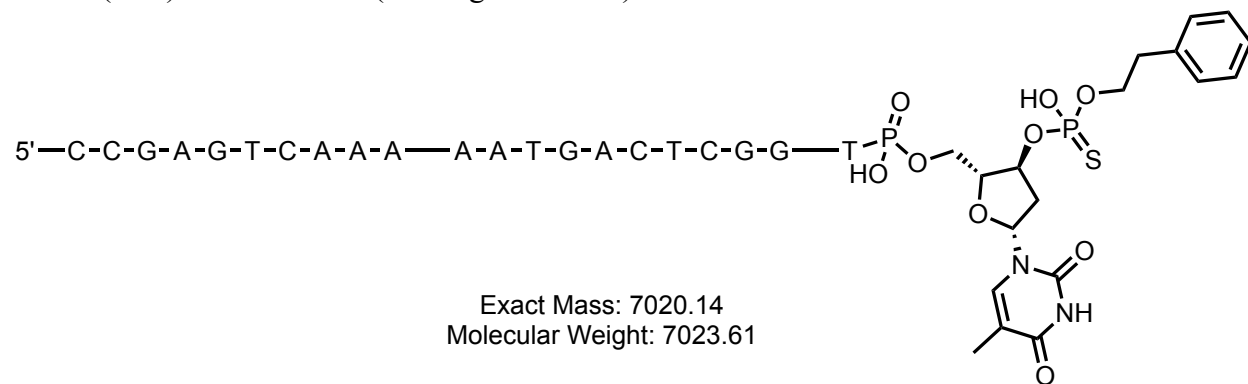

A260 Chromatogram

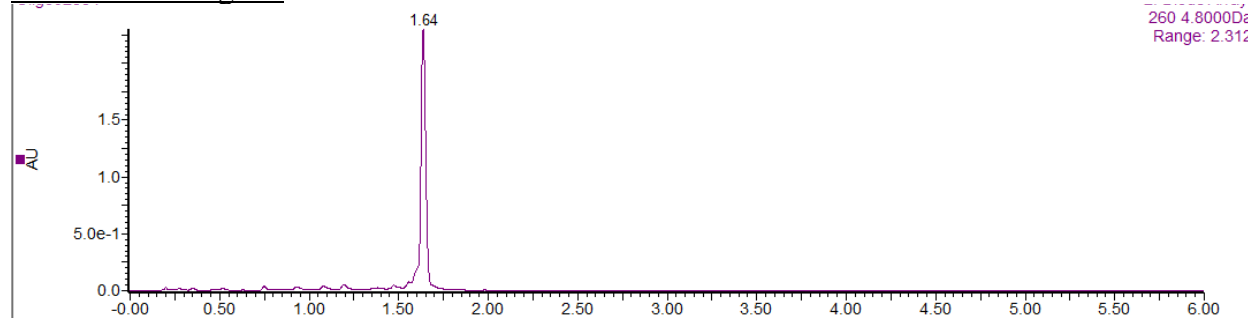

Mass Spectrum (RT= 1.64 min)

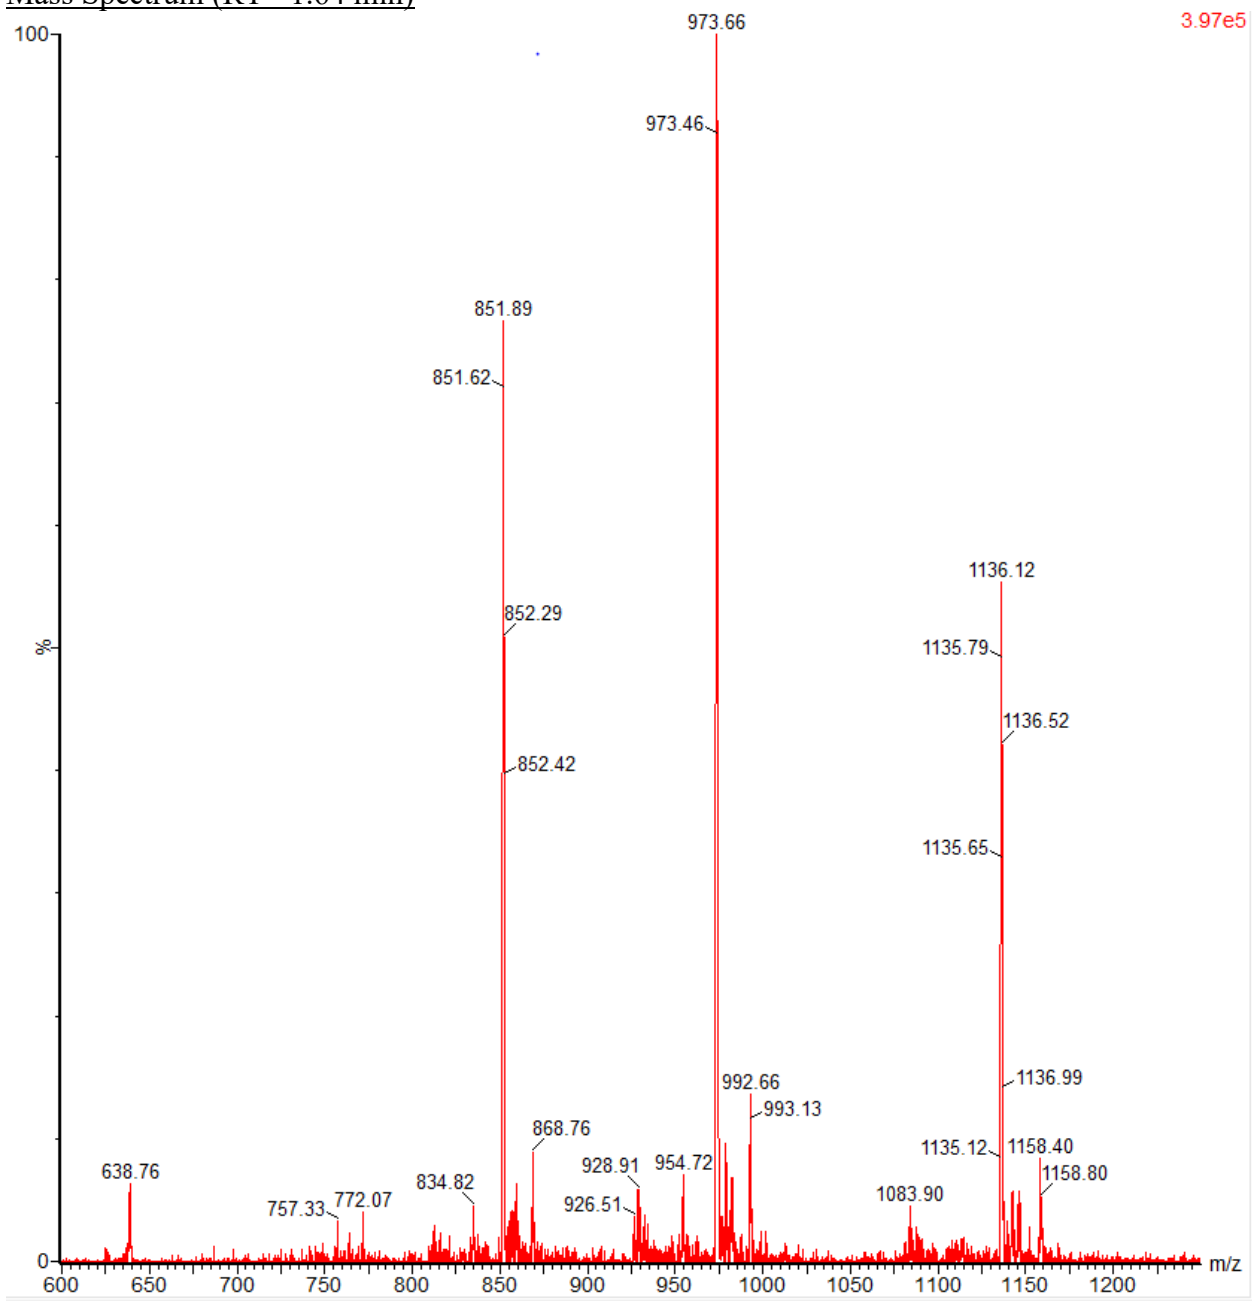

3.97e5

# Deconvoluted Mass Spectrum

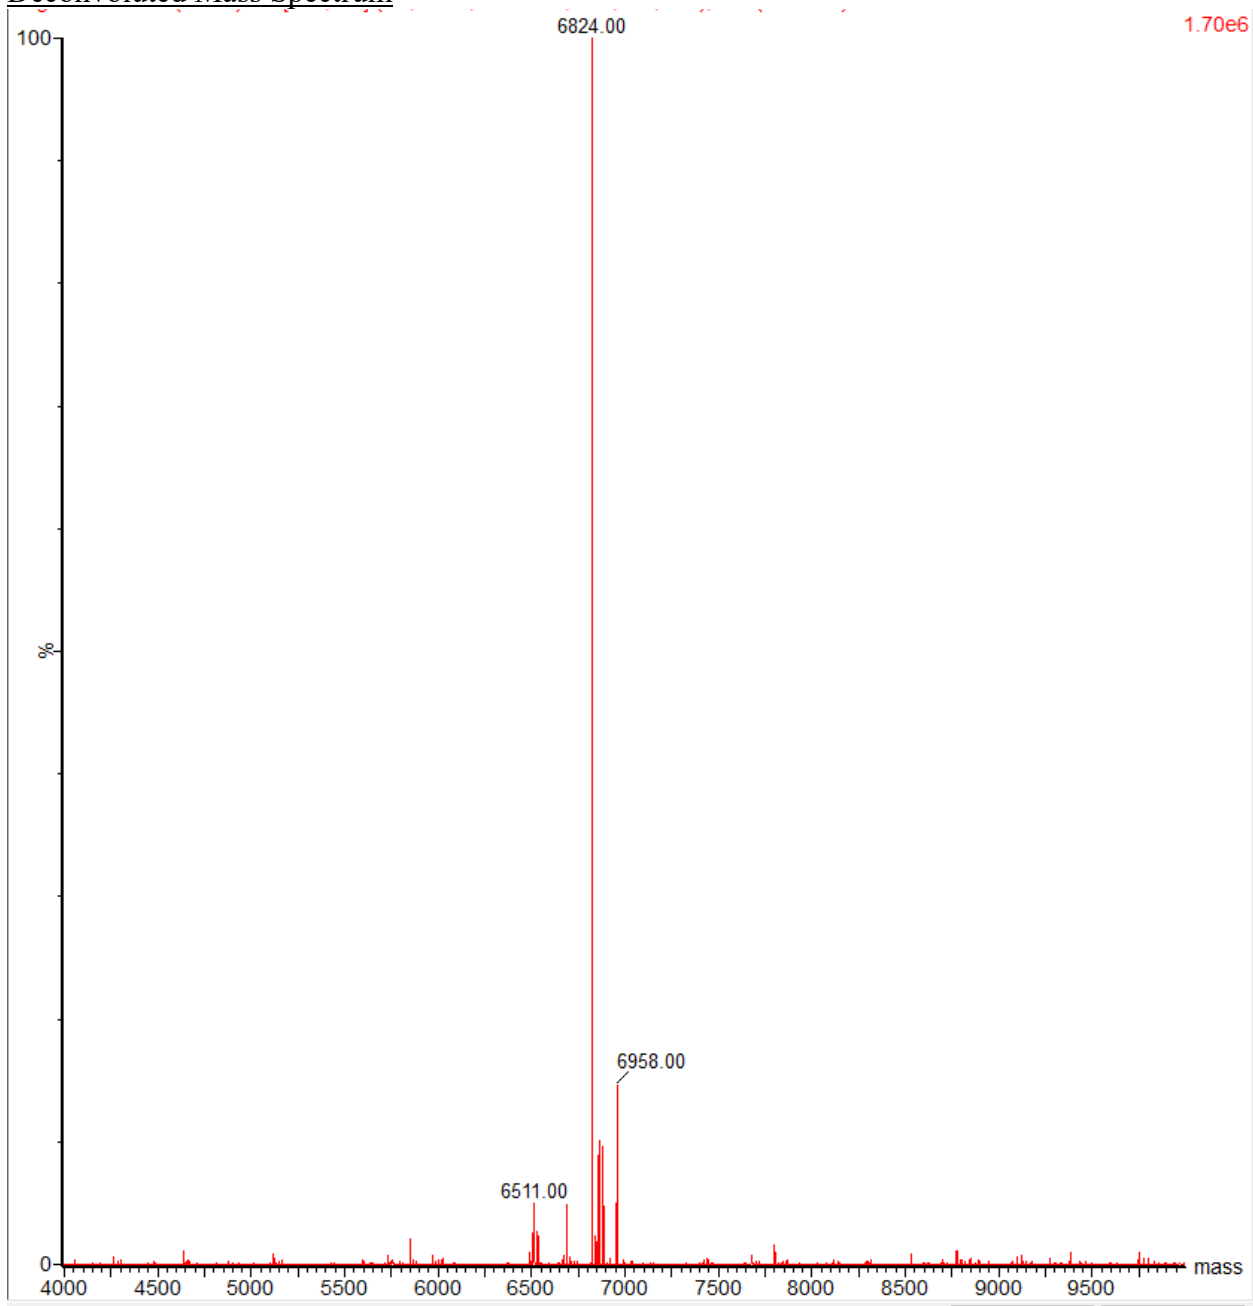

**Entry 6: 5'**

LCMS Characterization of **3**

Produced from **1** by General Procedure **2**:

Conversion (A260): 0%

Expected Mass: 7023.61

Expected (M-6)/6 Ion: 1169.60

Found Deconvoluted Mass: 6823.00 (Starting material **1**)

Found (M-6)/6 Ion: 1135.92 (Starting material **1**)

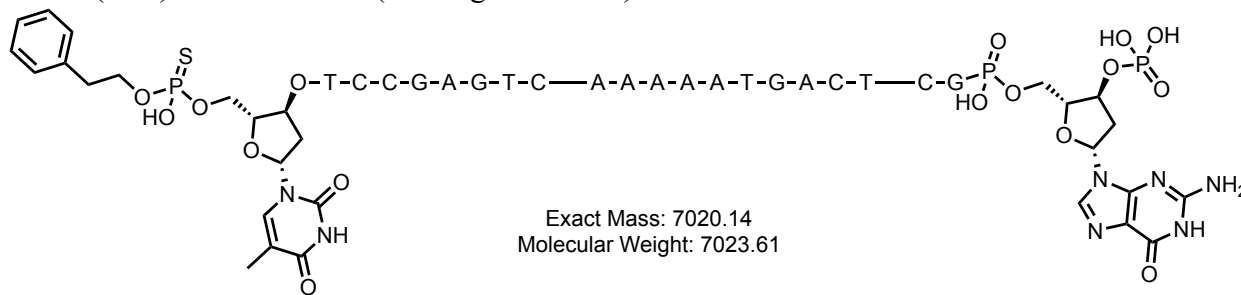

A260 Chromatogram

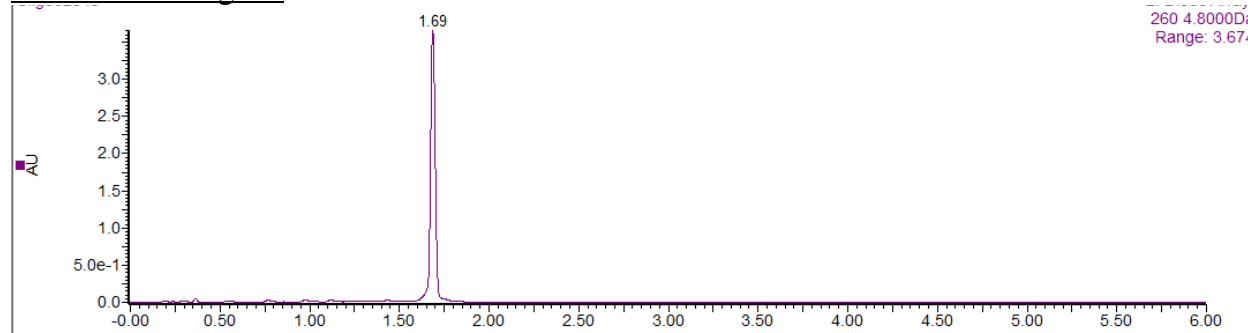

Mass Spectrum (RT= 1.69 min)

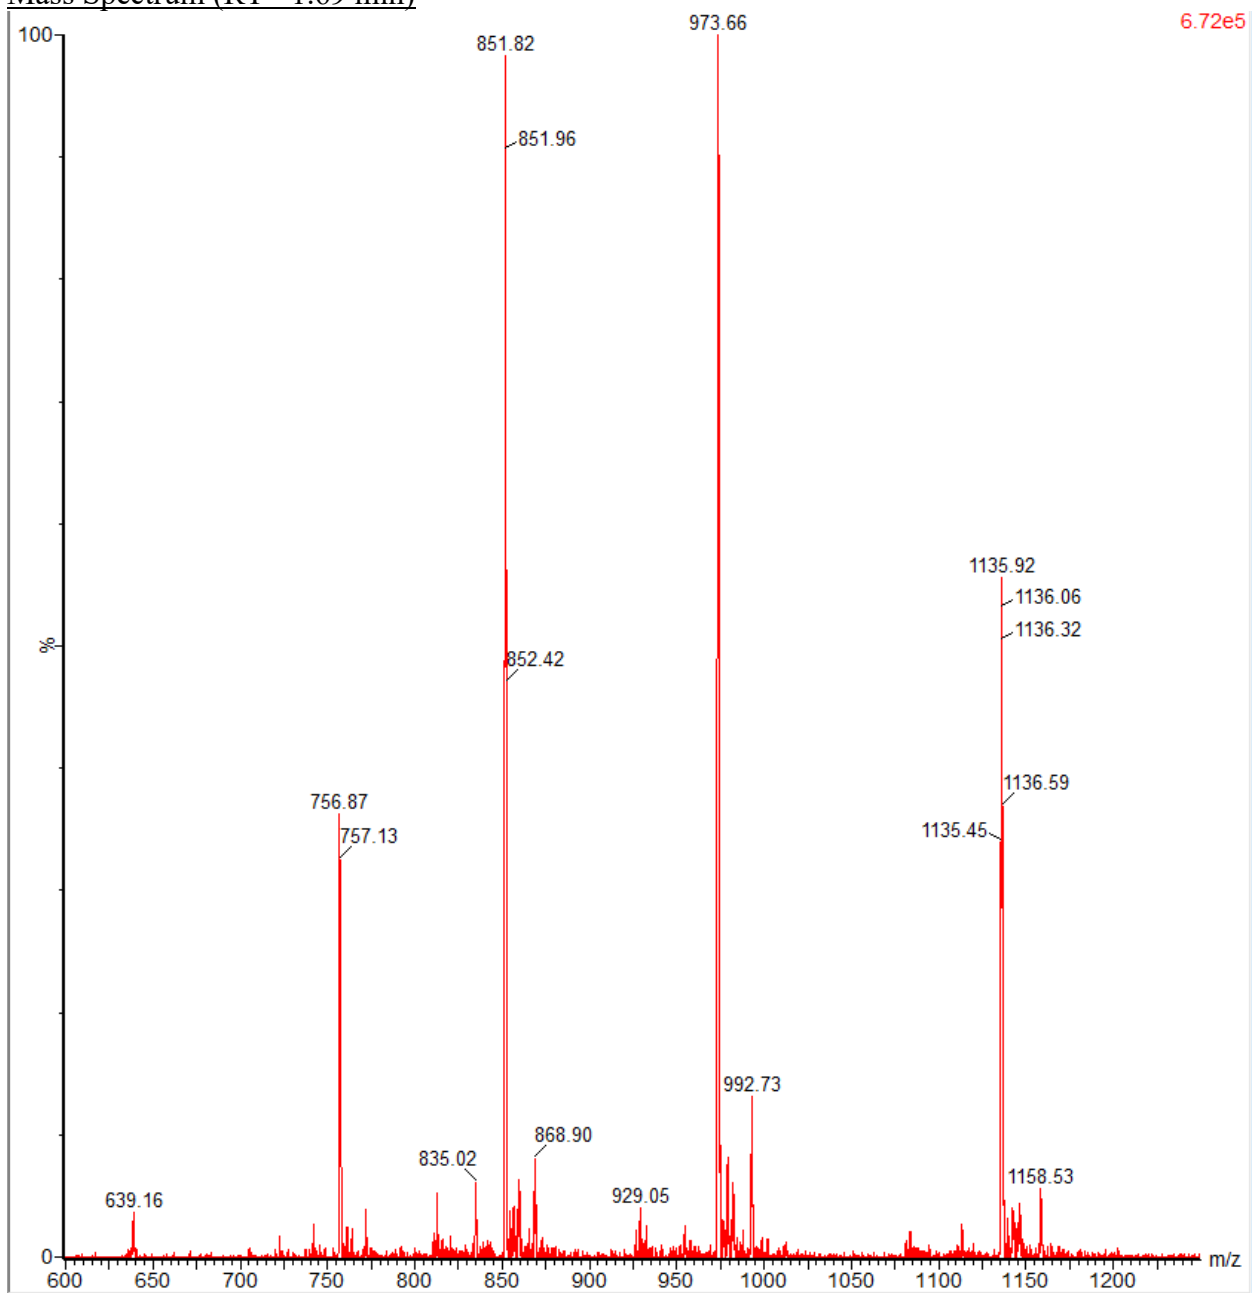

# Deconvoluted Mass Spectrum

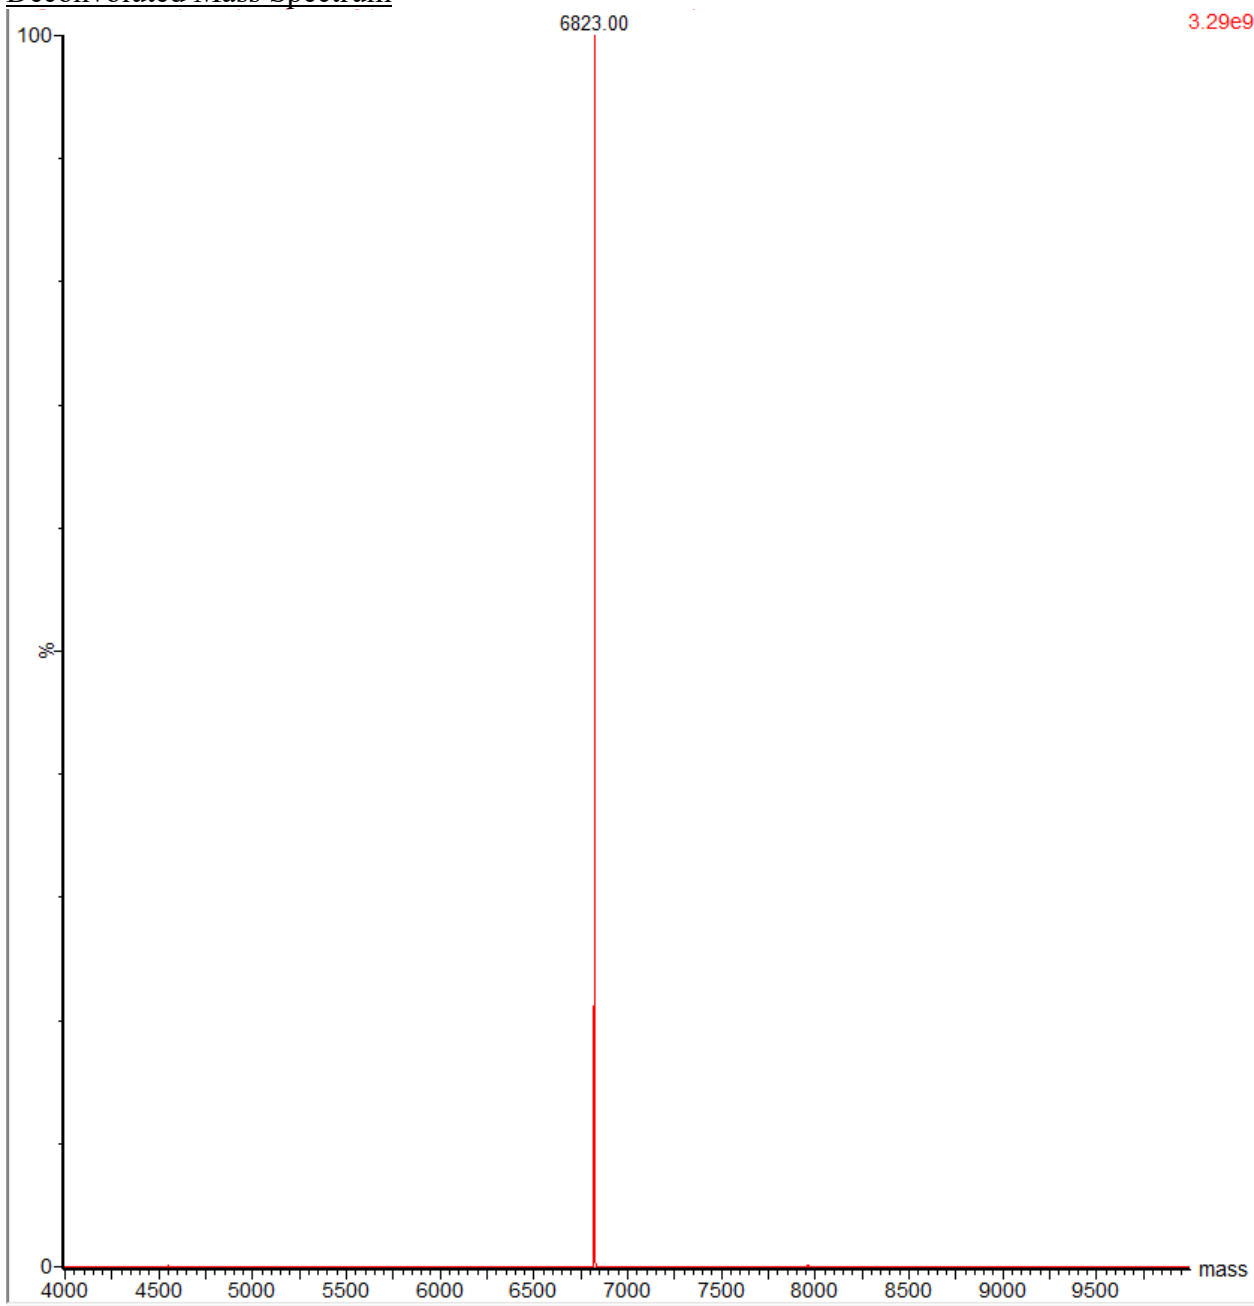



---

**Entry 6: 3'**LCMS Characterization of **4**Produced from **2** by General Procedure **2**:

Conversion (A260): 0%

Expected Mass: 7023.61

Expected (M-6)/6 Ion: 1169.60

Found Deconvoluted Mass: 6823 (Starting material **2**)Found (M-6)/6 Ion: 1135.85 (Starting material **2**)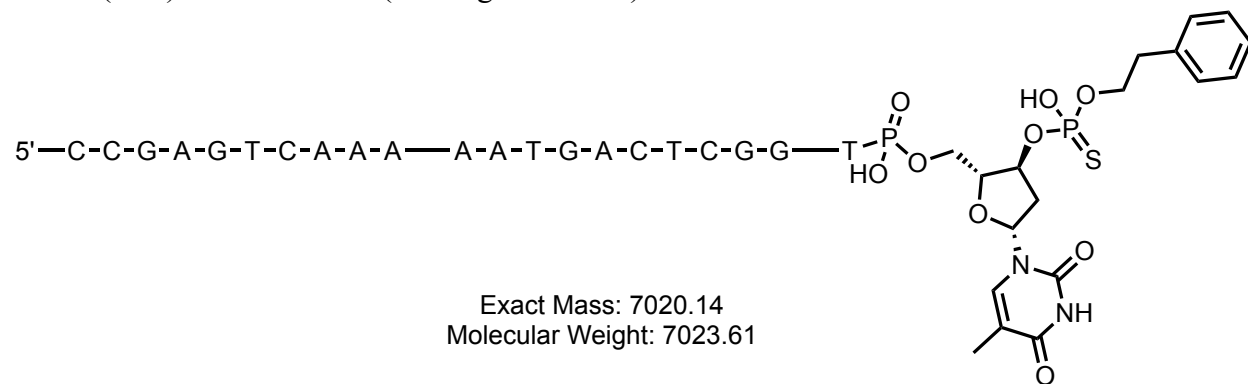**A260 Chromatogram**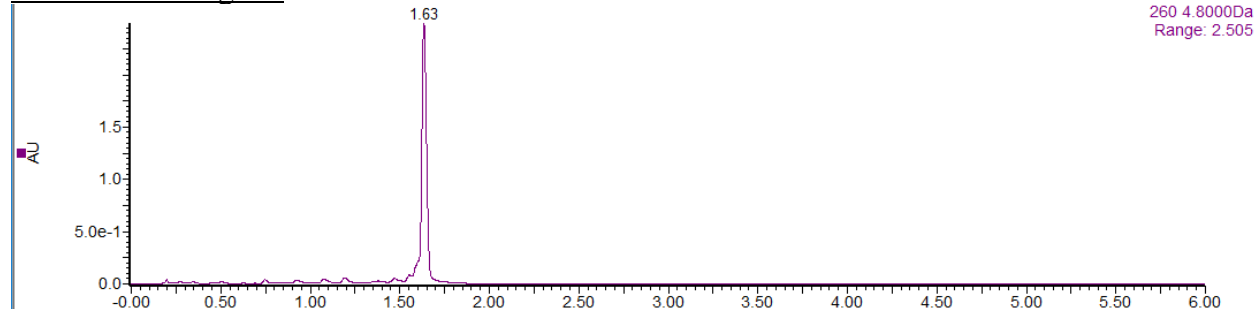

Mass Spectrum (RT= 1.63 min)

6.88e5

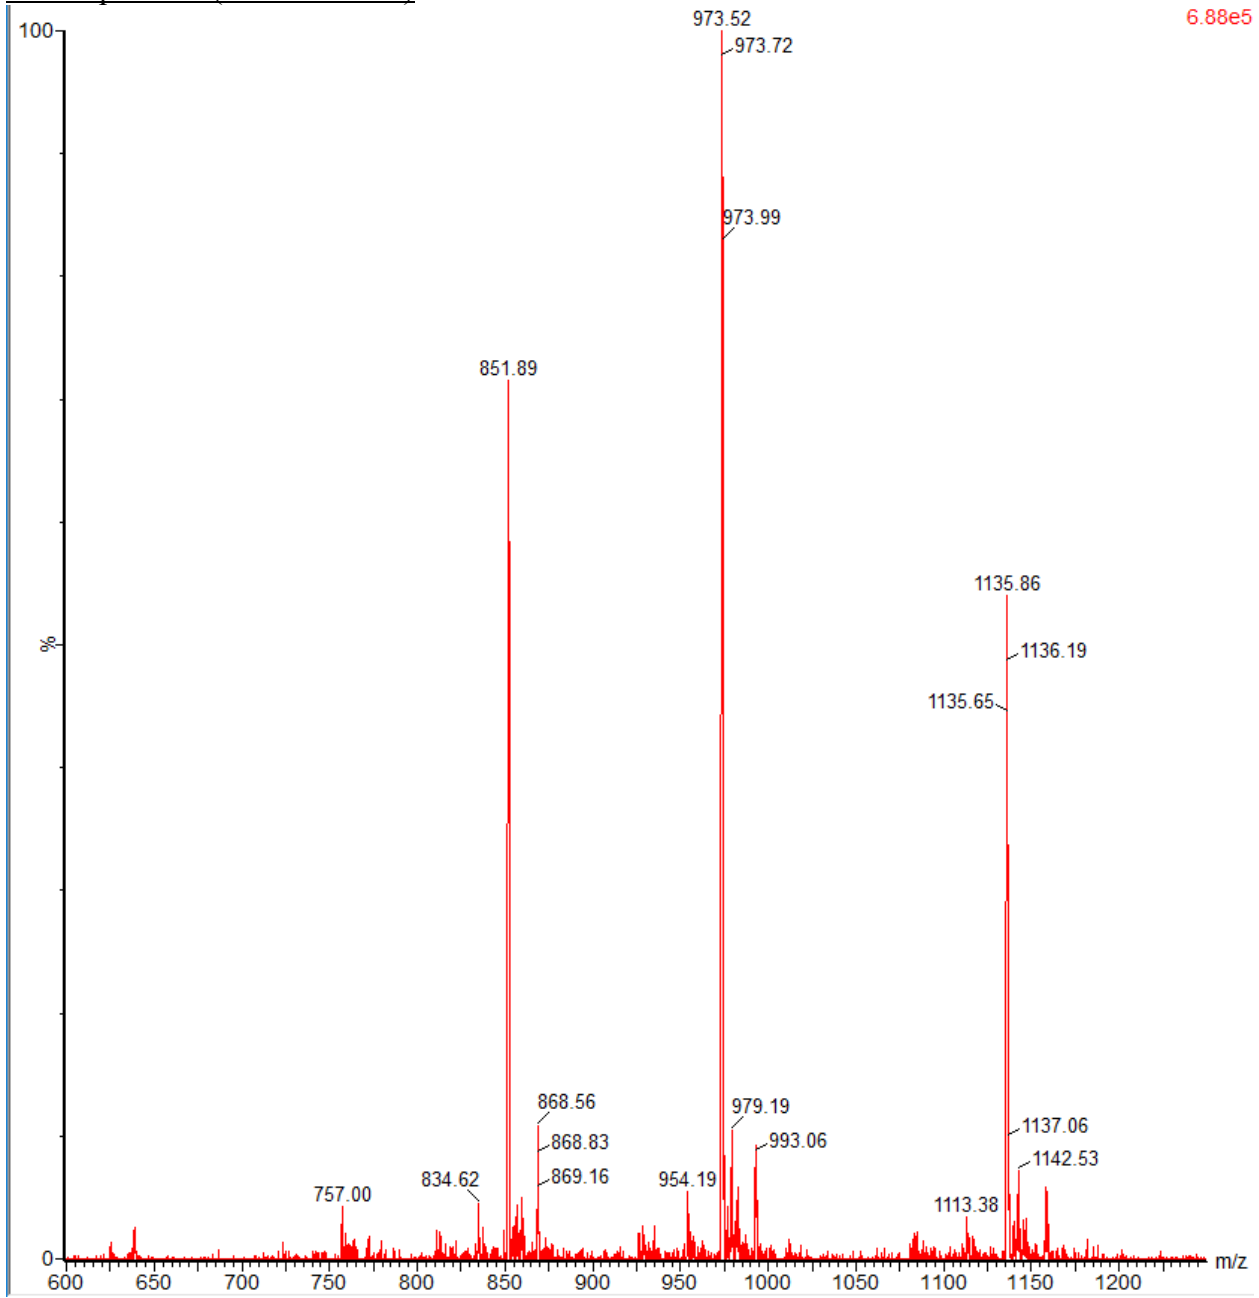

# Deconvoluted Mass Spectrum

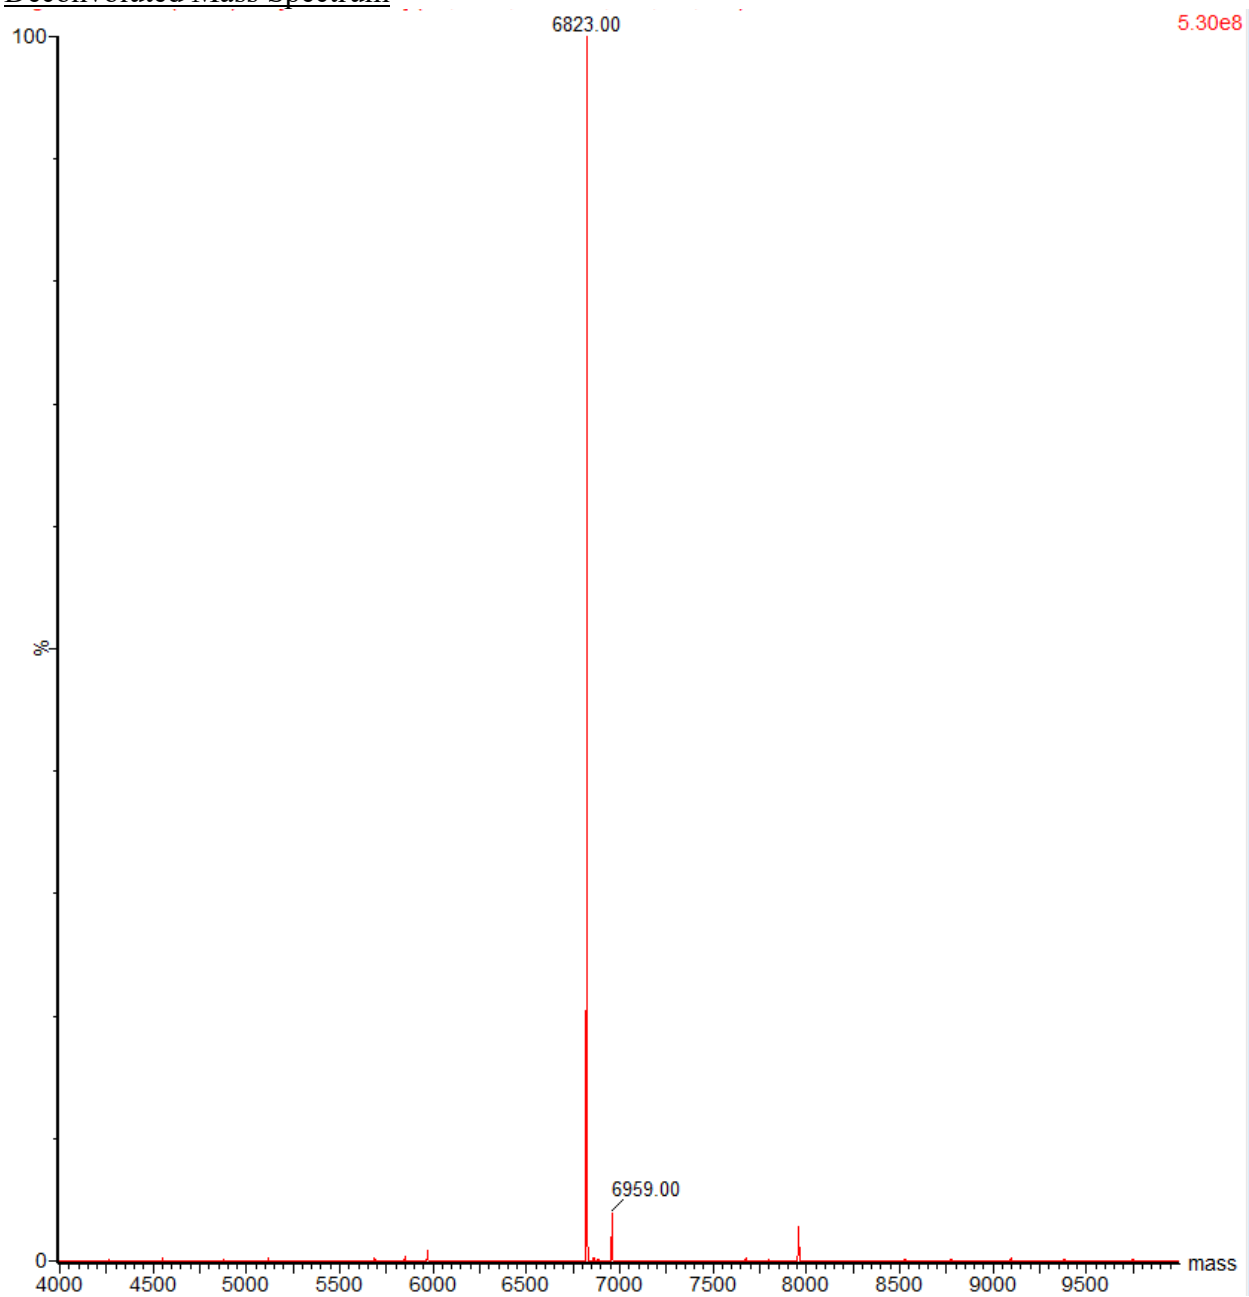

**Entry 7: 5'**

LCMS Characterization of **3**

Produced from **1** by General Procedure **2**:

Conversion (A260): 0%

Expected Mass: 7023.61

Expected (M-6)/6 Ion: 1169.60

Found Deconvoluted Mass: 6823.00 (Starting material **1**)

Found (M-6)/6 Ion: 1136.12

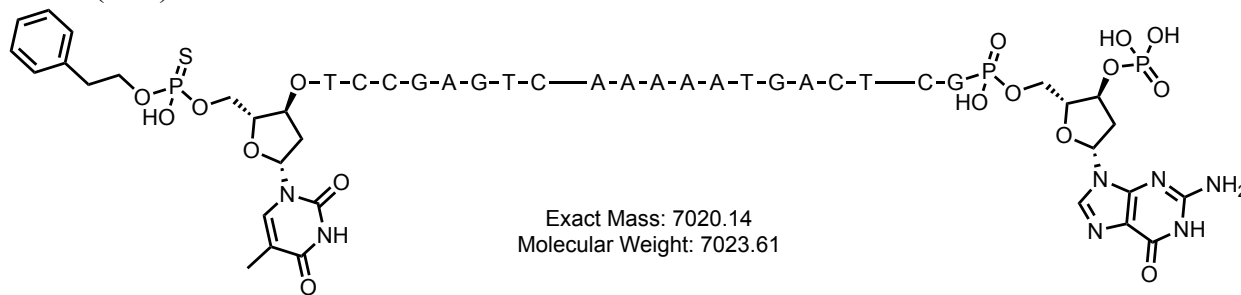

A260 Chromatogram

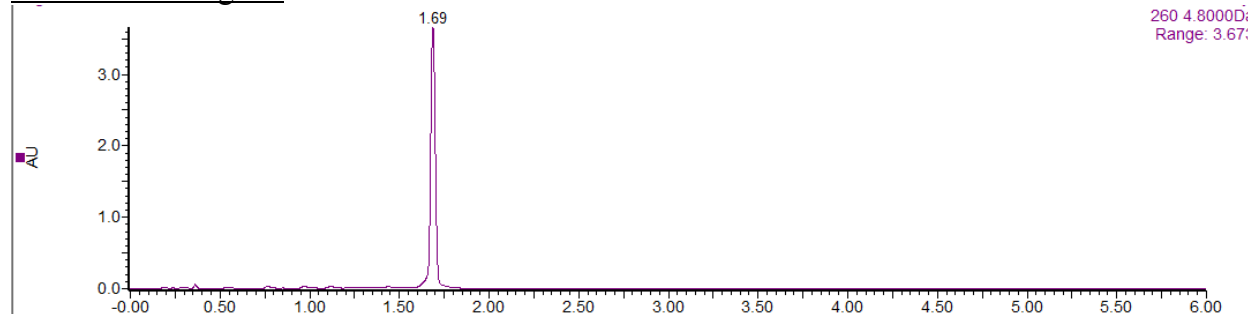

Mass Spectrum (RT= 1.69 min)

6.41e5

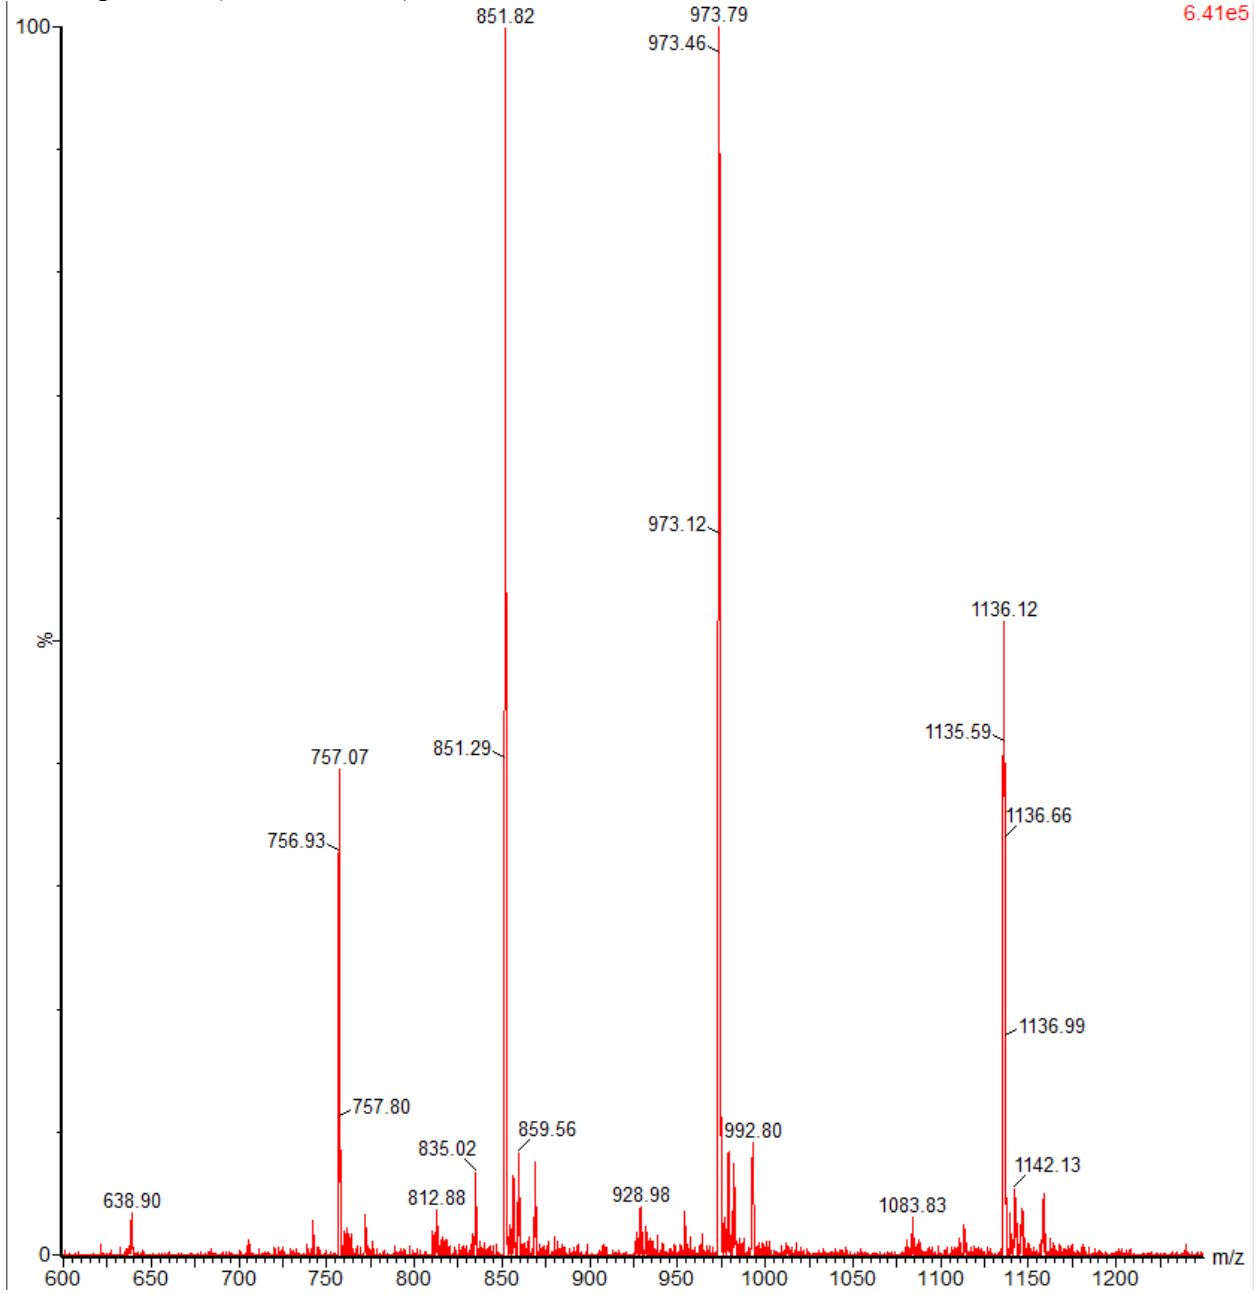

# Deconvoluted Mass Spectrum

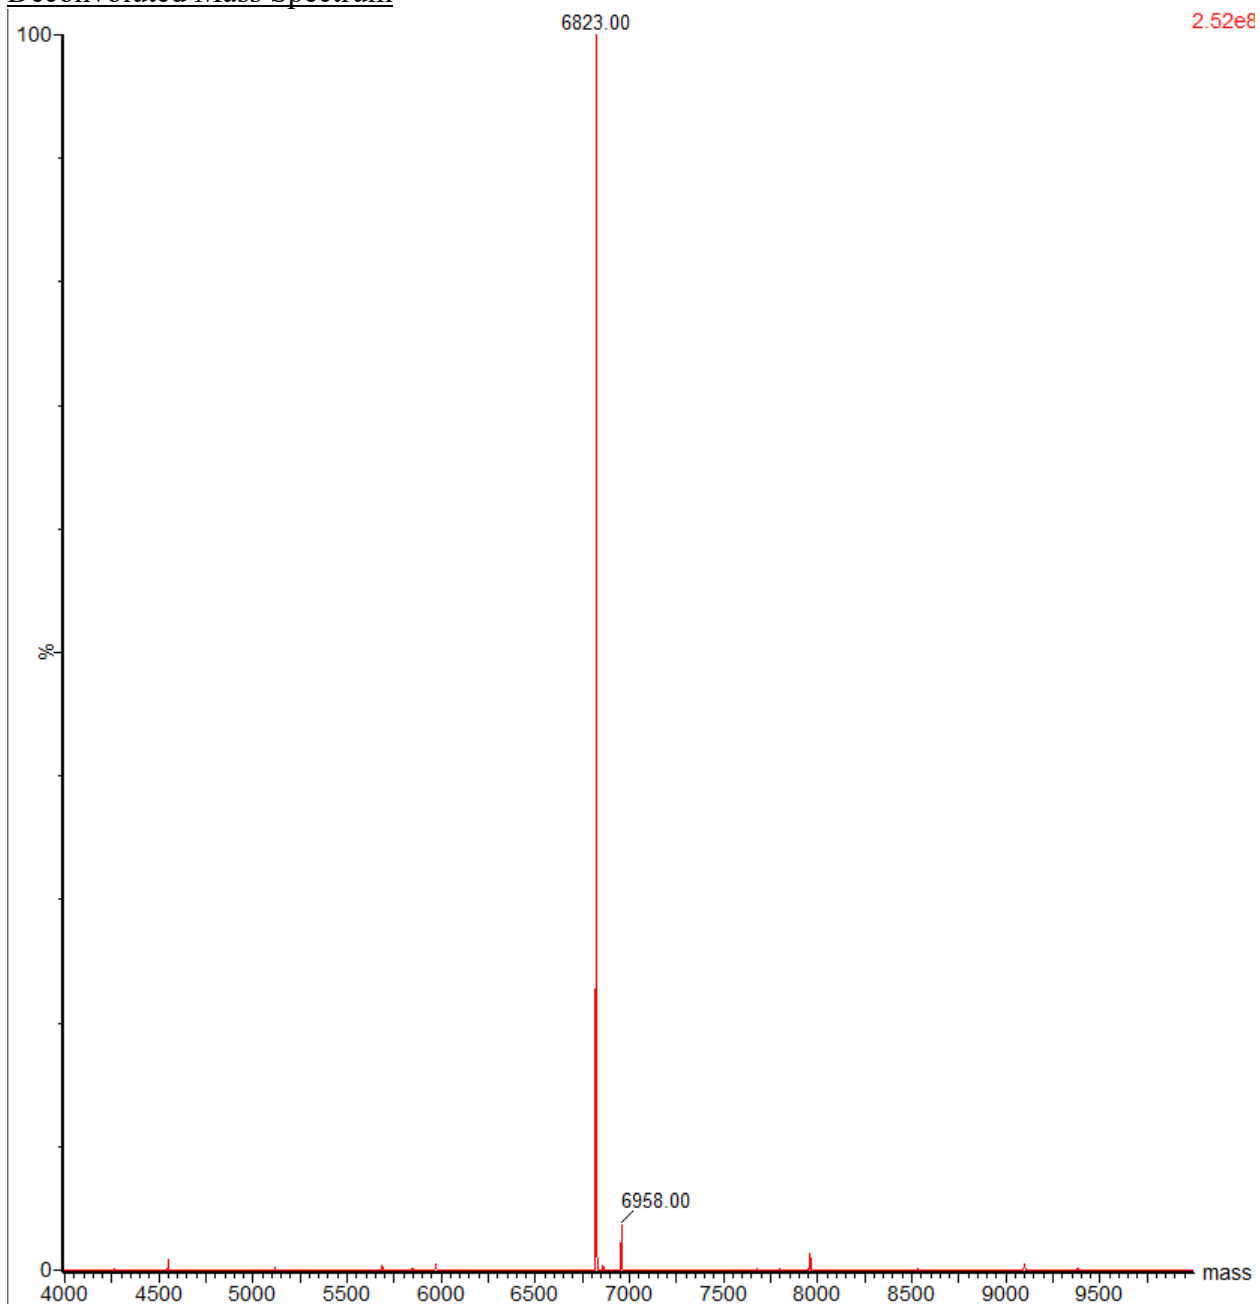

**Entry 7: 3'**

LCMS Characterization of **4**

Produced from **2** by General Procedure **2**:

Conversion (A260): 56%

Expected Mass: 7023.61

Expected (M-6)/6 Ion: 1169.60

Found Deconvoluted Mass: 6823.00 (Starting material **2**)

Found (M-6)/6 Ion: 1136.26 (Starting material **2**)



A260 Chromatogram

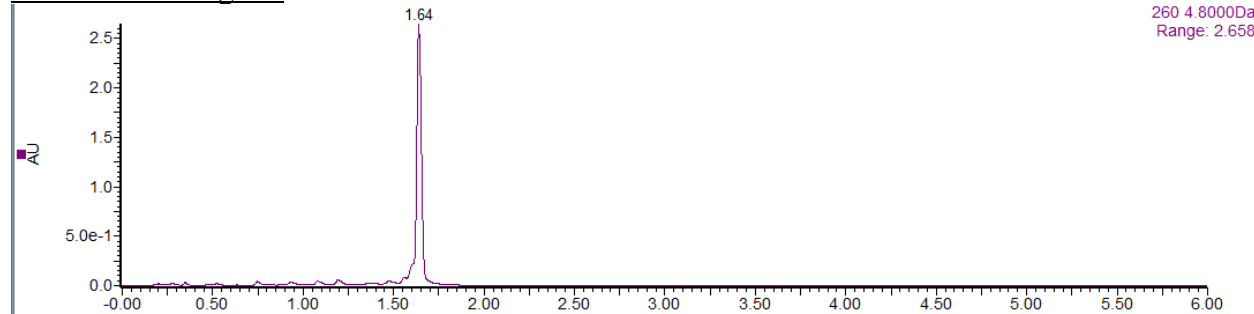

Mass Spectrum (RT= 1.64 min)

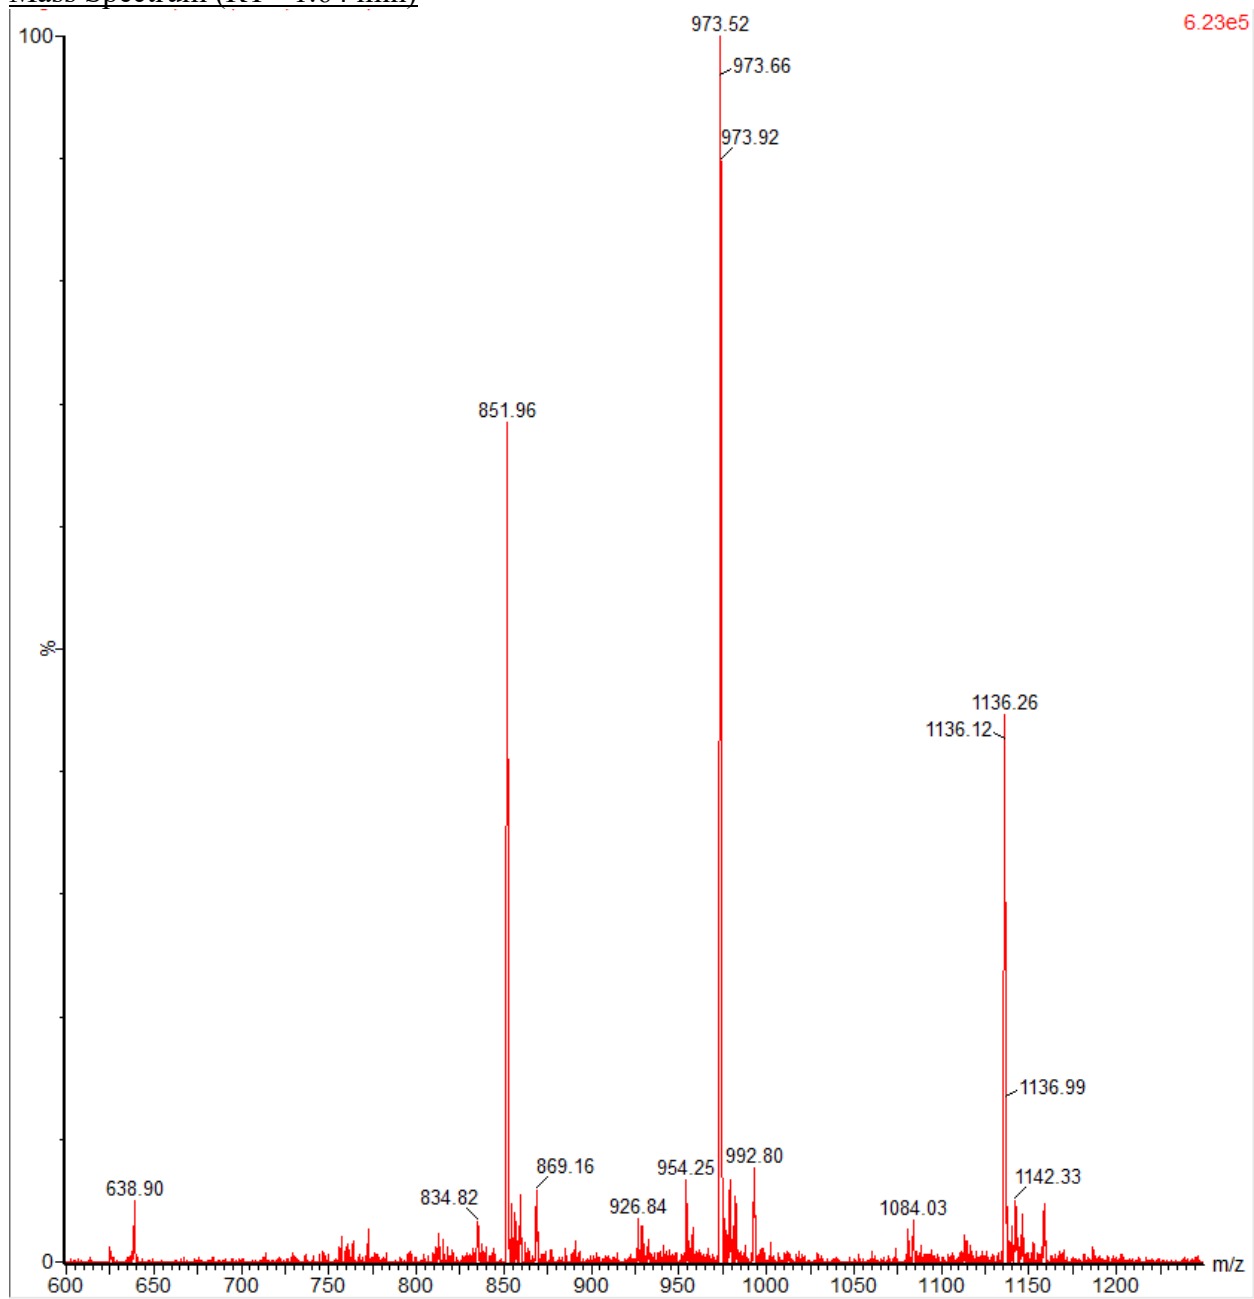



# Deconvoluted Mass Spectrum

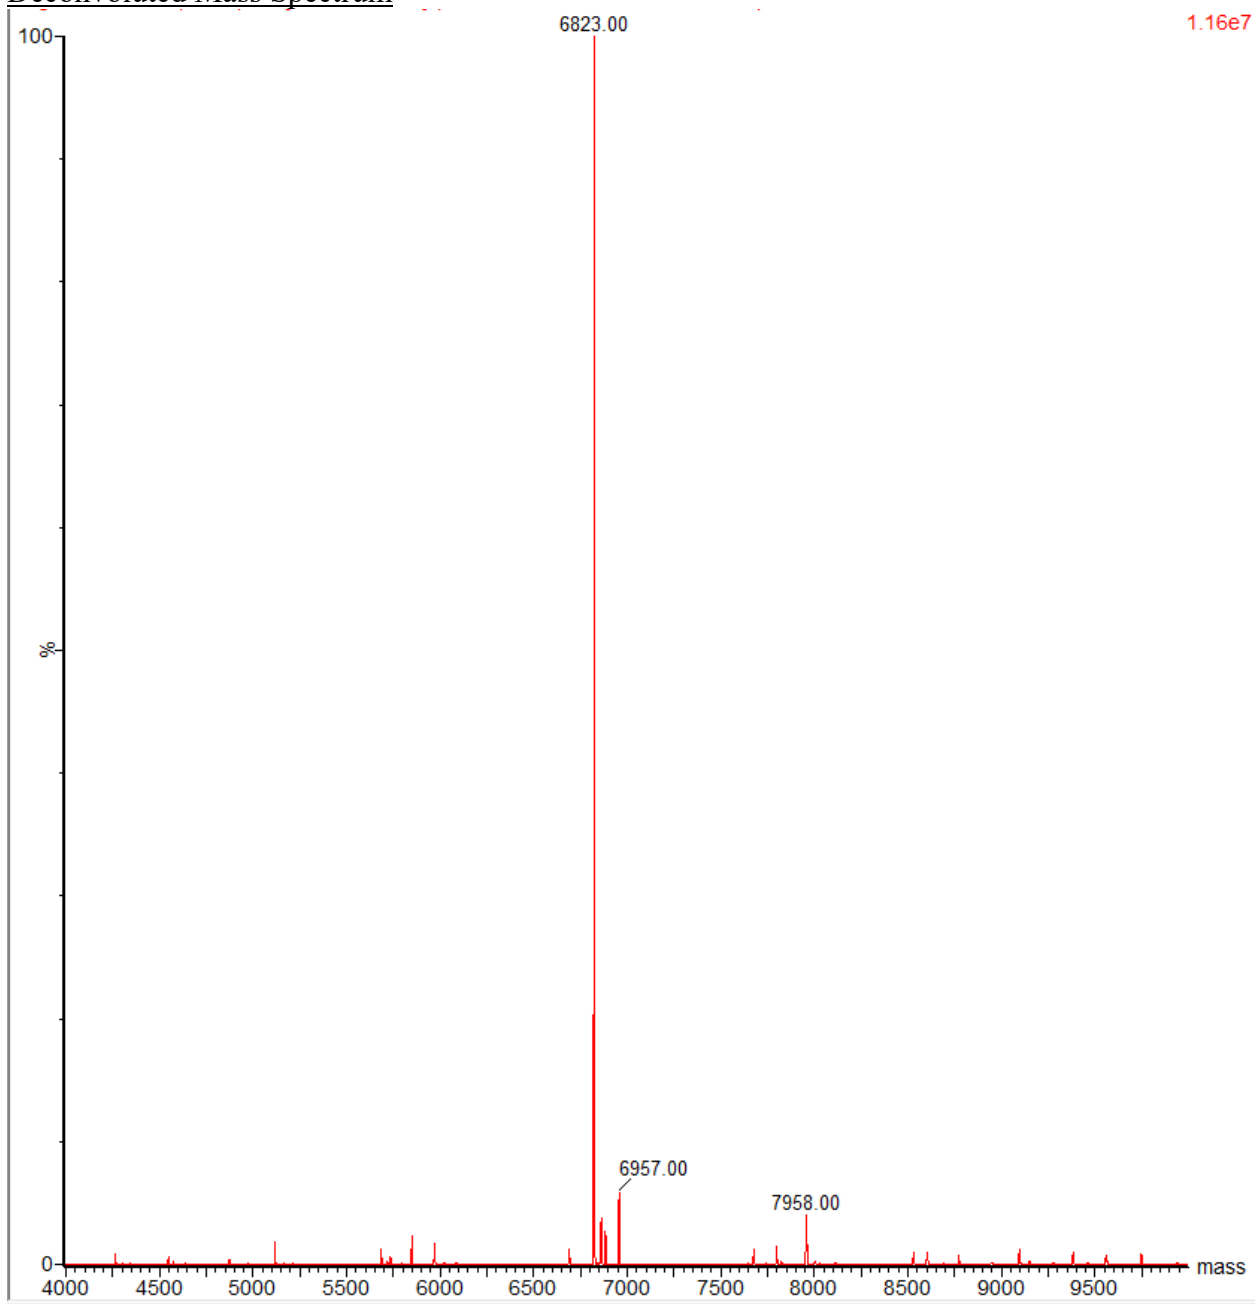

**Entry 8: 5'**

LCMS Characterization of **3**

Produced from **1** by General Procedure **2**:

Conversion (A260): 0%

Expected Mass: 7023.61

Expected (M-6)/6 Ion: 1169.60

Found Deconvoluted Mass: 6824.00 (Starting material **1**)

Found (M-6)/6 Ion: 1135.79 (Starting material **1**)



**A260 Chromatogram**

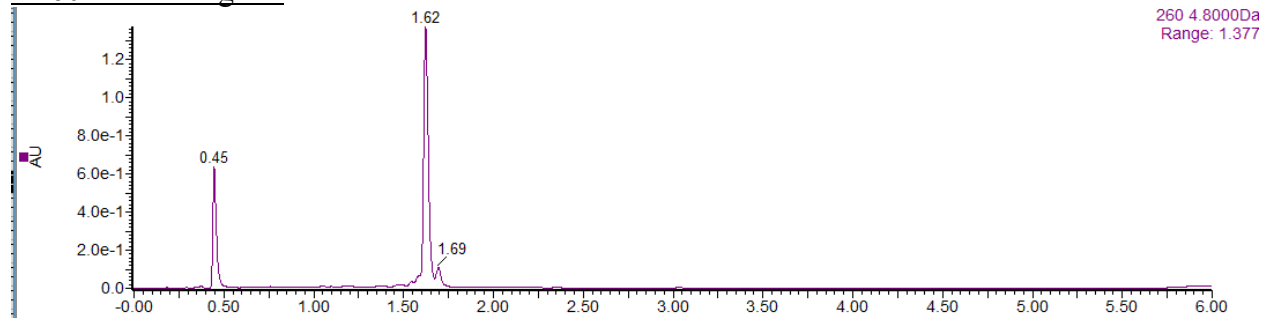

Mass Spectrum (RT= 1.62 min)

1.96e6

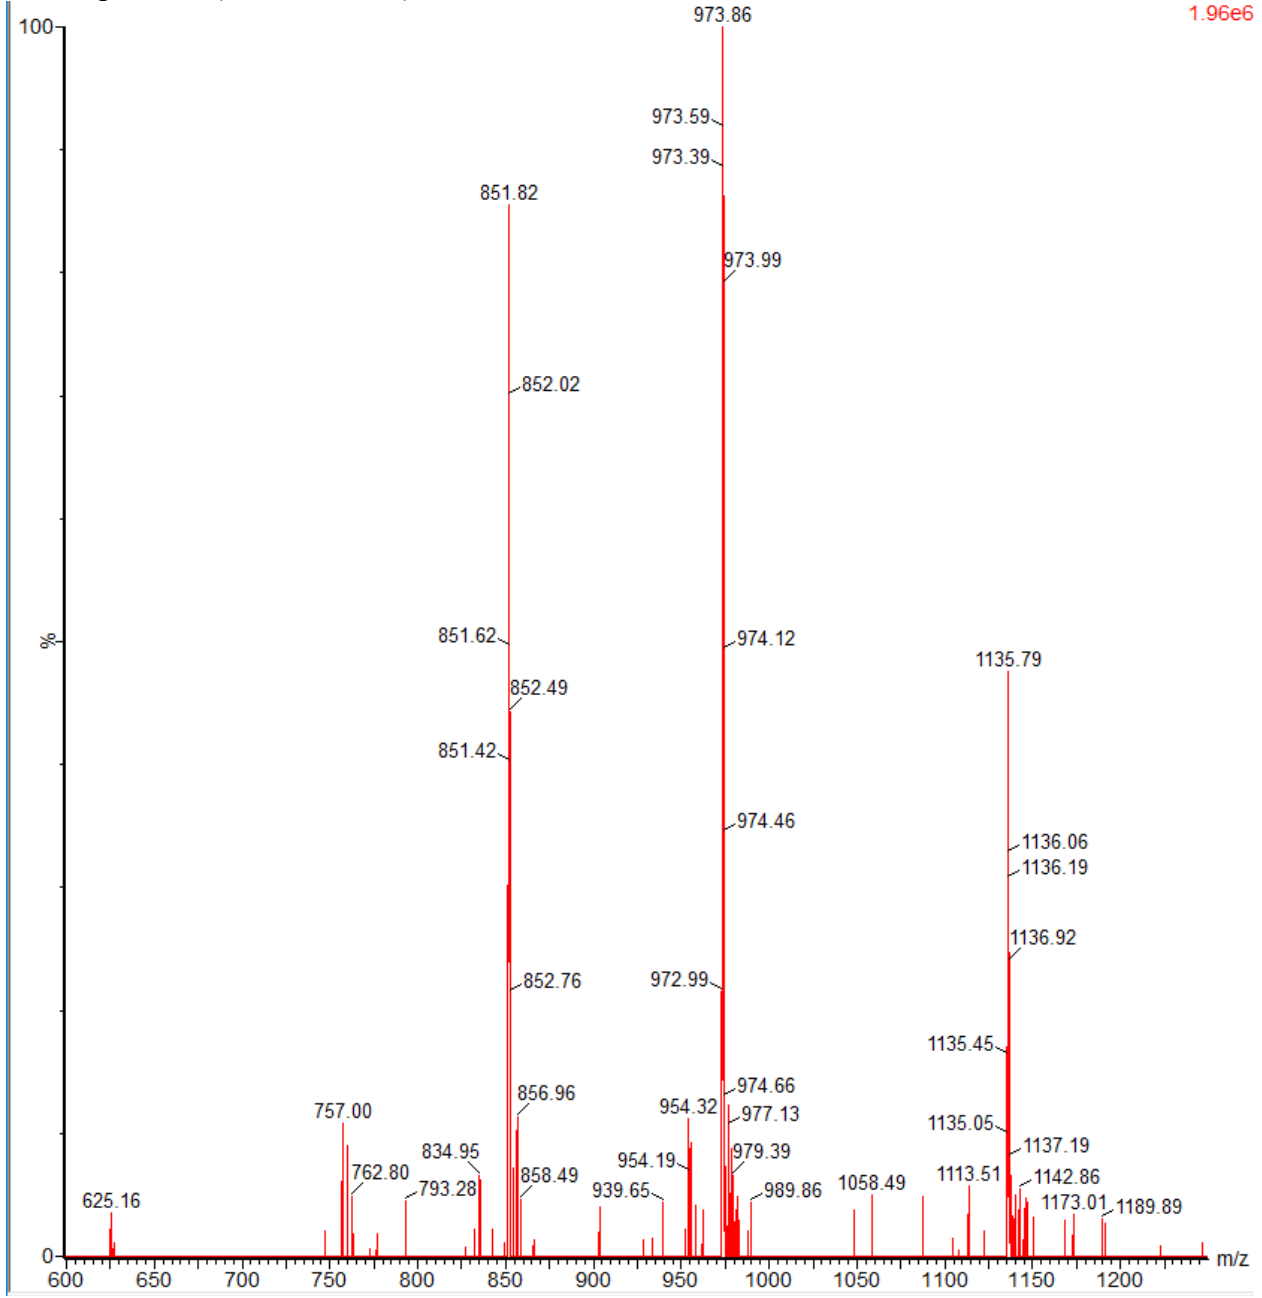

# Deconvoluted Mass Spectrum

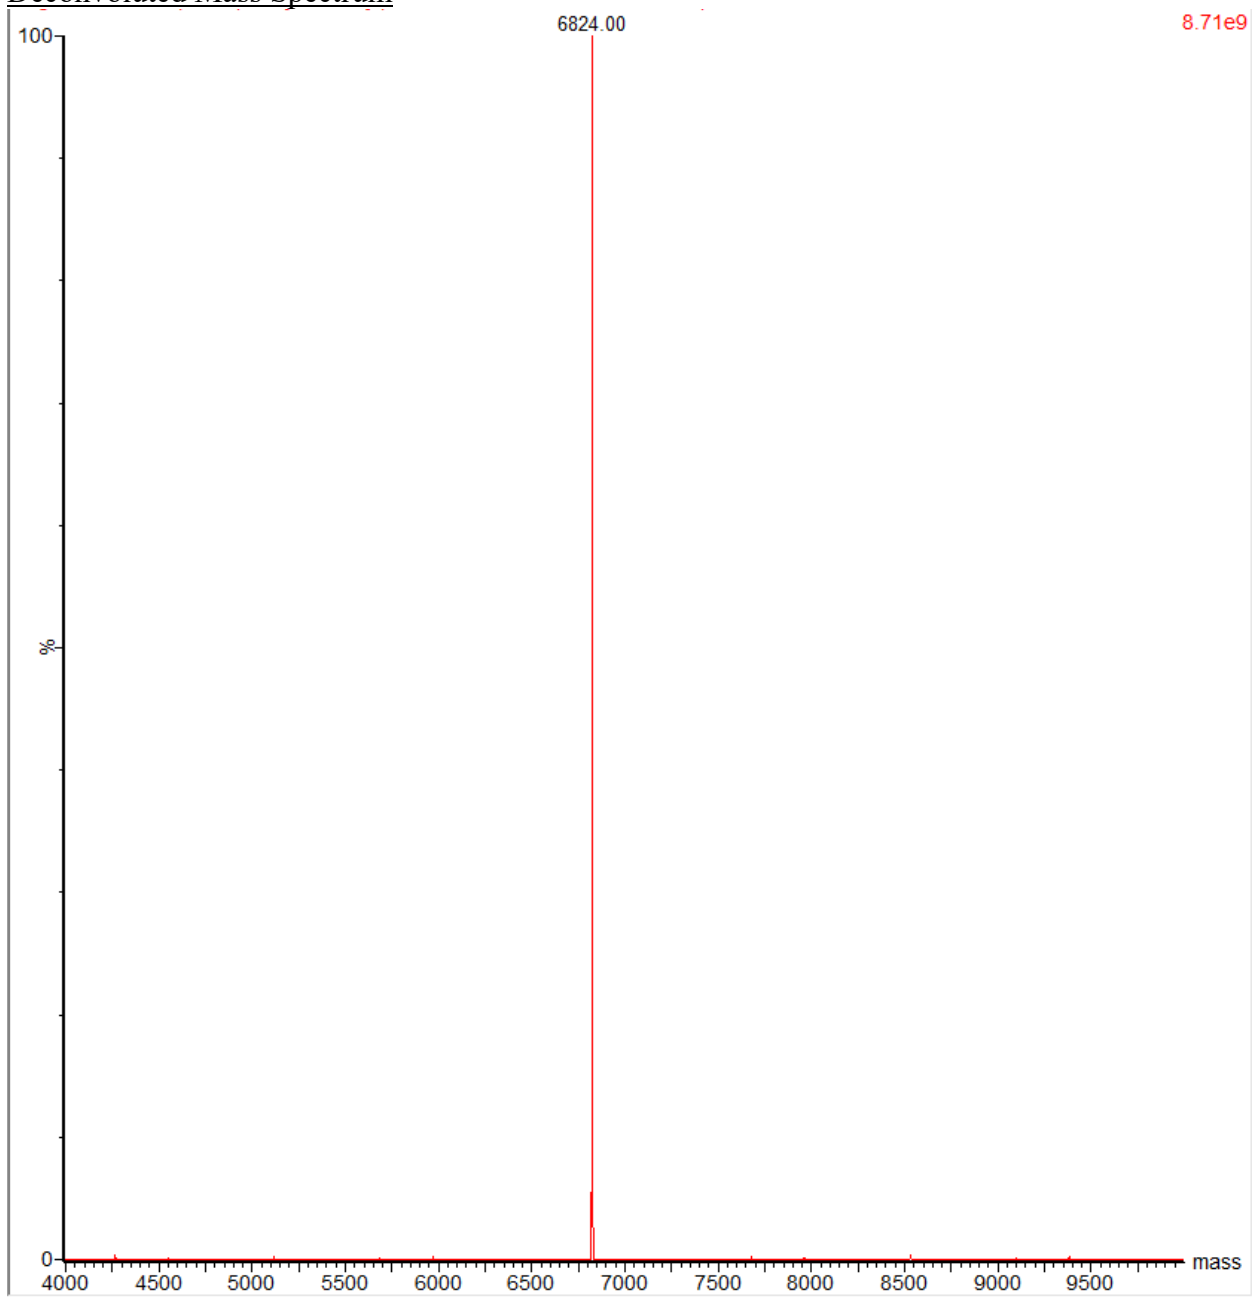

---

**Entry 8: 3'**LCMS Characterization of **4**Produced from **2** by General Procedure **2**:

Conversion (A260): 0%

Expected Mass: 7023.61

Expected (M-6)/6 Ion: 1169.60

Found Deconvoluted Mass: 6824.00 (Starting material **2**)Found (M-6)/6 Ion: 1136.32 (Starting material **2**)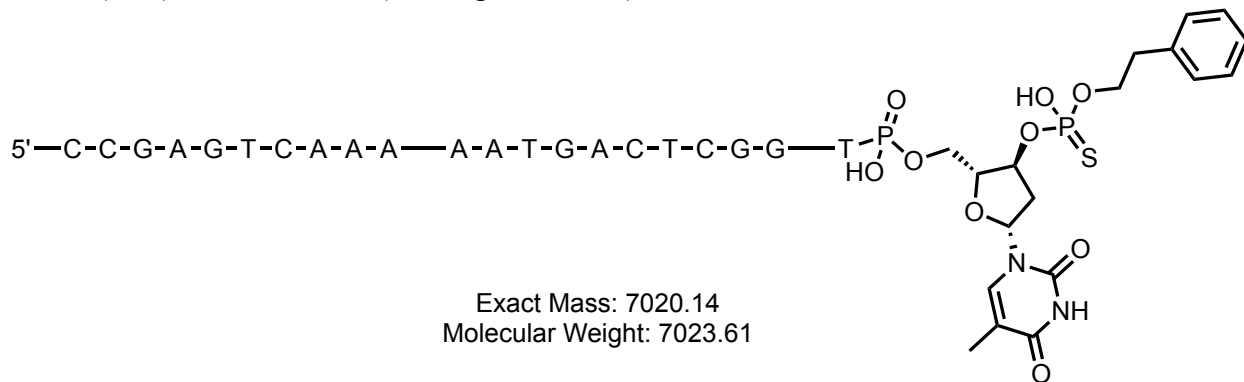**A260 Chromatogram**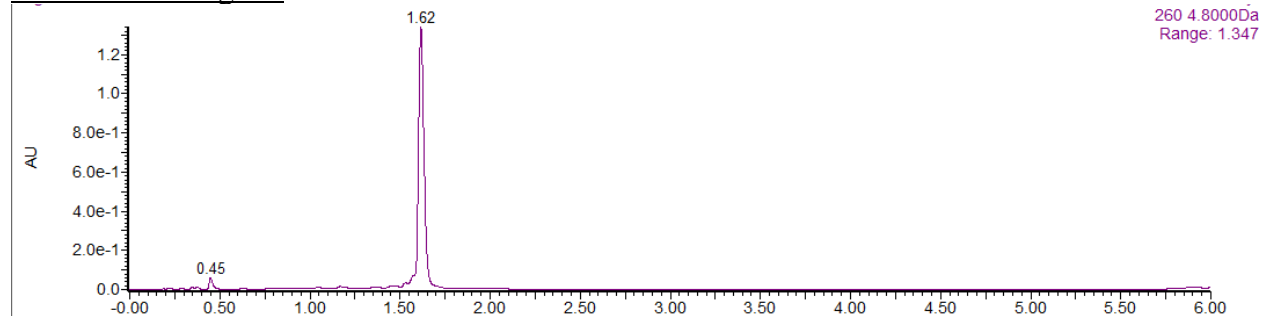

Mass Spectrum (RT= 1.62 min)

1.38e6

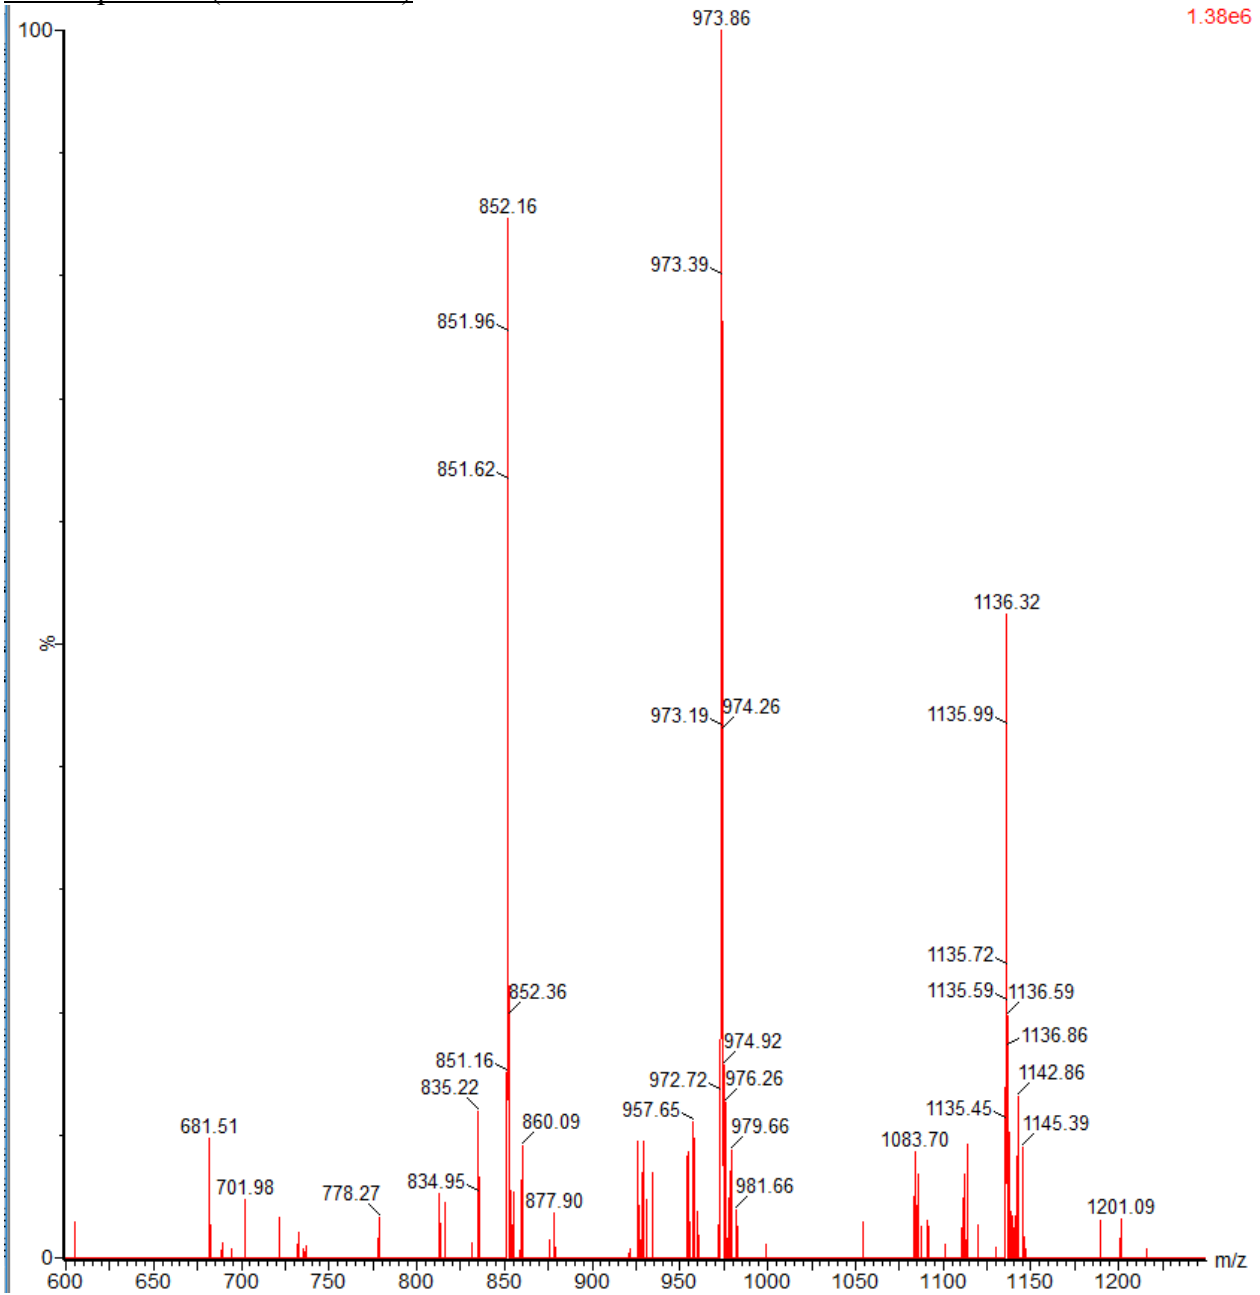

# Deconvoluted Mass Spectrum

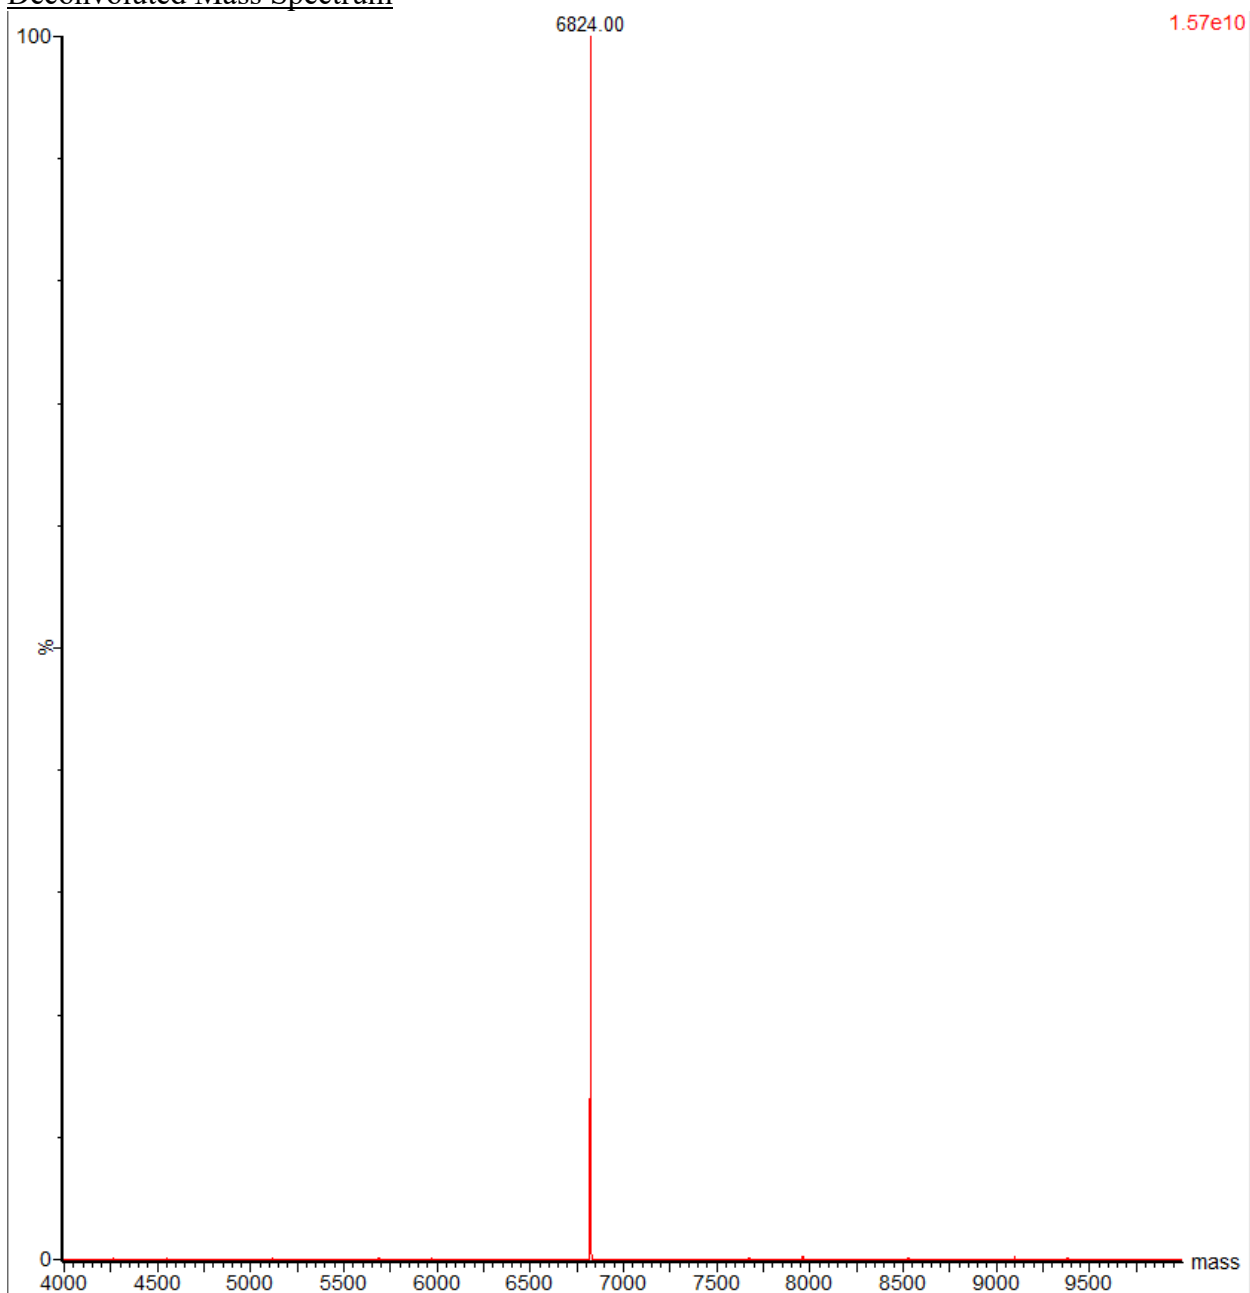

**Entry 9: 5'**

LCMS Characterization of **3**

Produced from **1** by General Procedure **2**:

Conversion (A260): <10%

Expected Mass: 7023.61

Expected (M-6)/6 Ion: 1169.60

Found Deconvoluted Mass: 7024.00

Found (M-6)/6 Ion: 1169.54



A260 Chromatogram

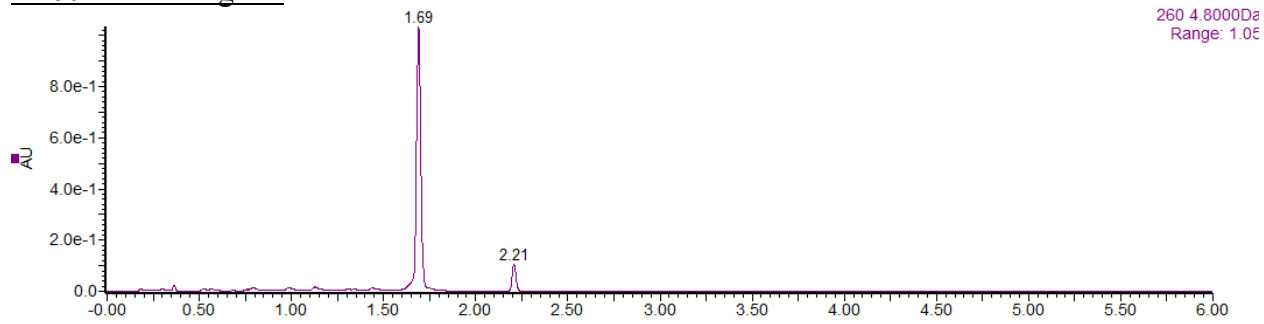



Mass Spectrum (RT= 2.21 min)

3.14e4

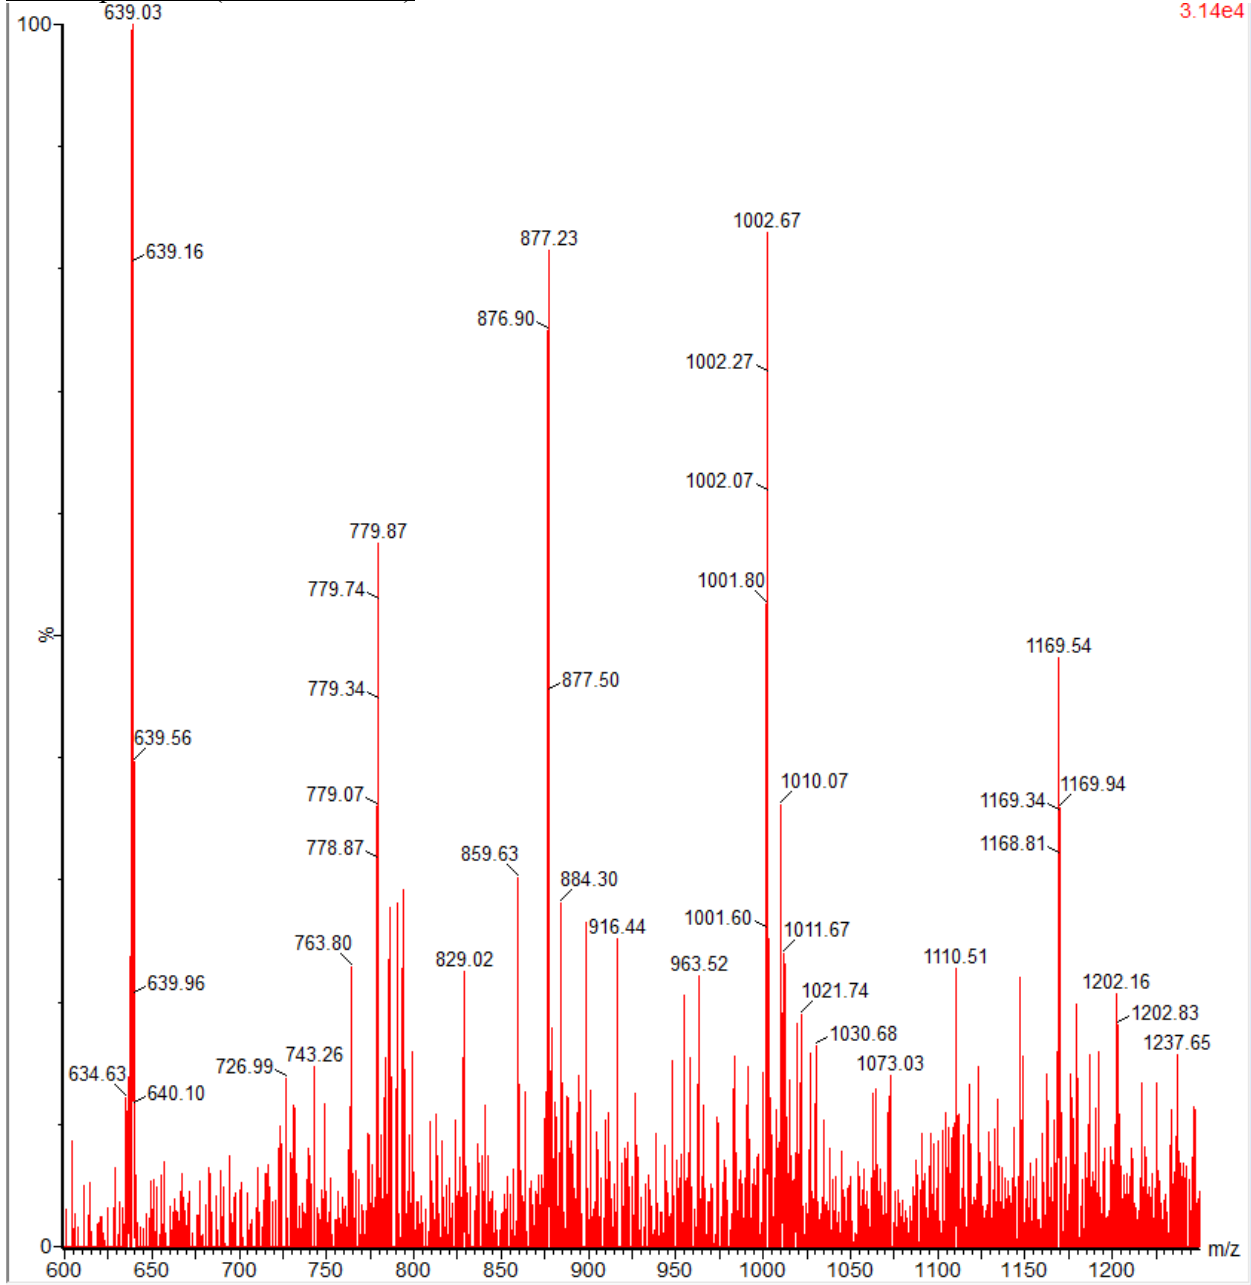

# Deconvoluted Mass Spectrum

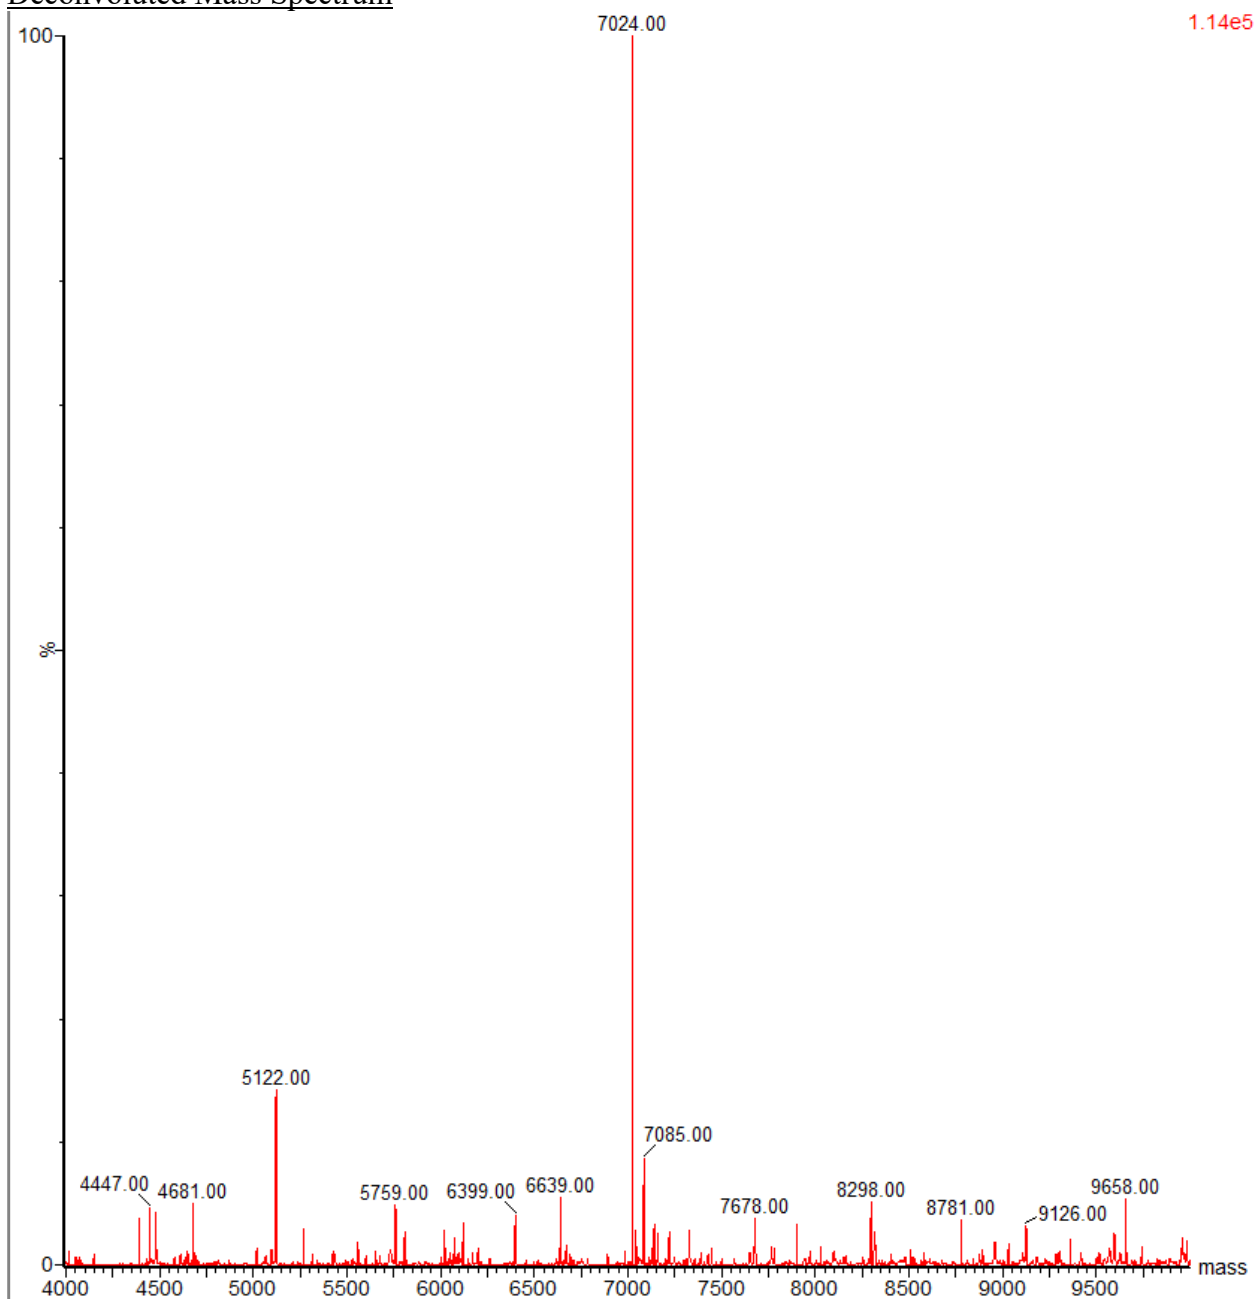

**Entry 9: 3'**

LCMS Characterization of **4**

Produced from **2** by General Procedure **2**:

Conversion (A260): <10%

Expected Mass: 7023.61

Expected (M-6)/6 Ion: 1169.60

Found Deconvoluted Mass: 7024.00

Found (M-6)/6 Ion: 1169.54



A260 Chromatogram

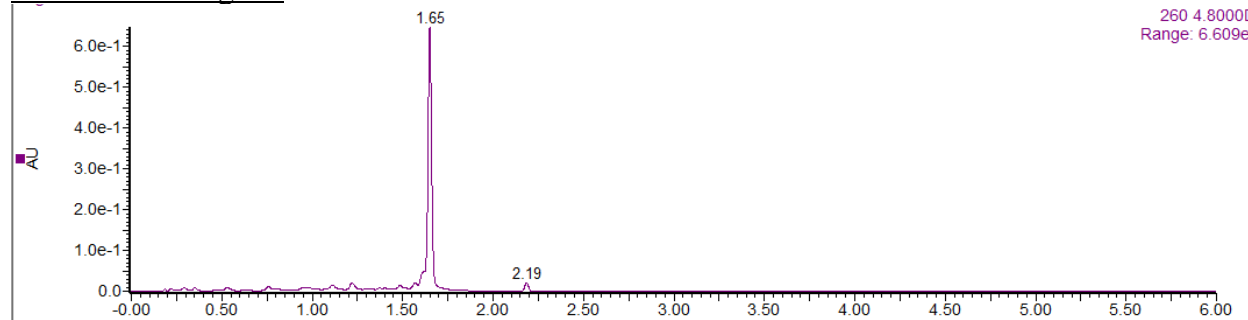

Mass Spectrum (RT= 2.19 min)

3.04e4

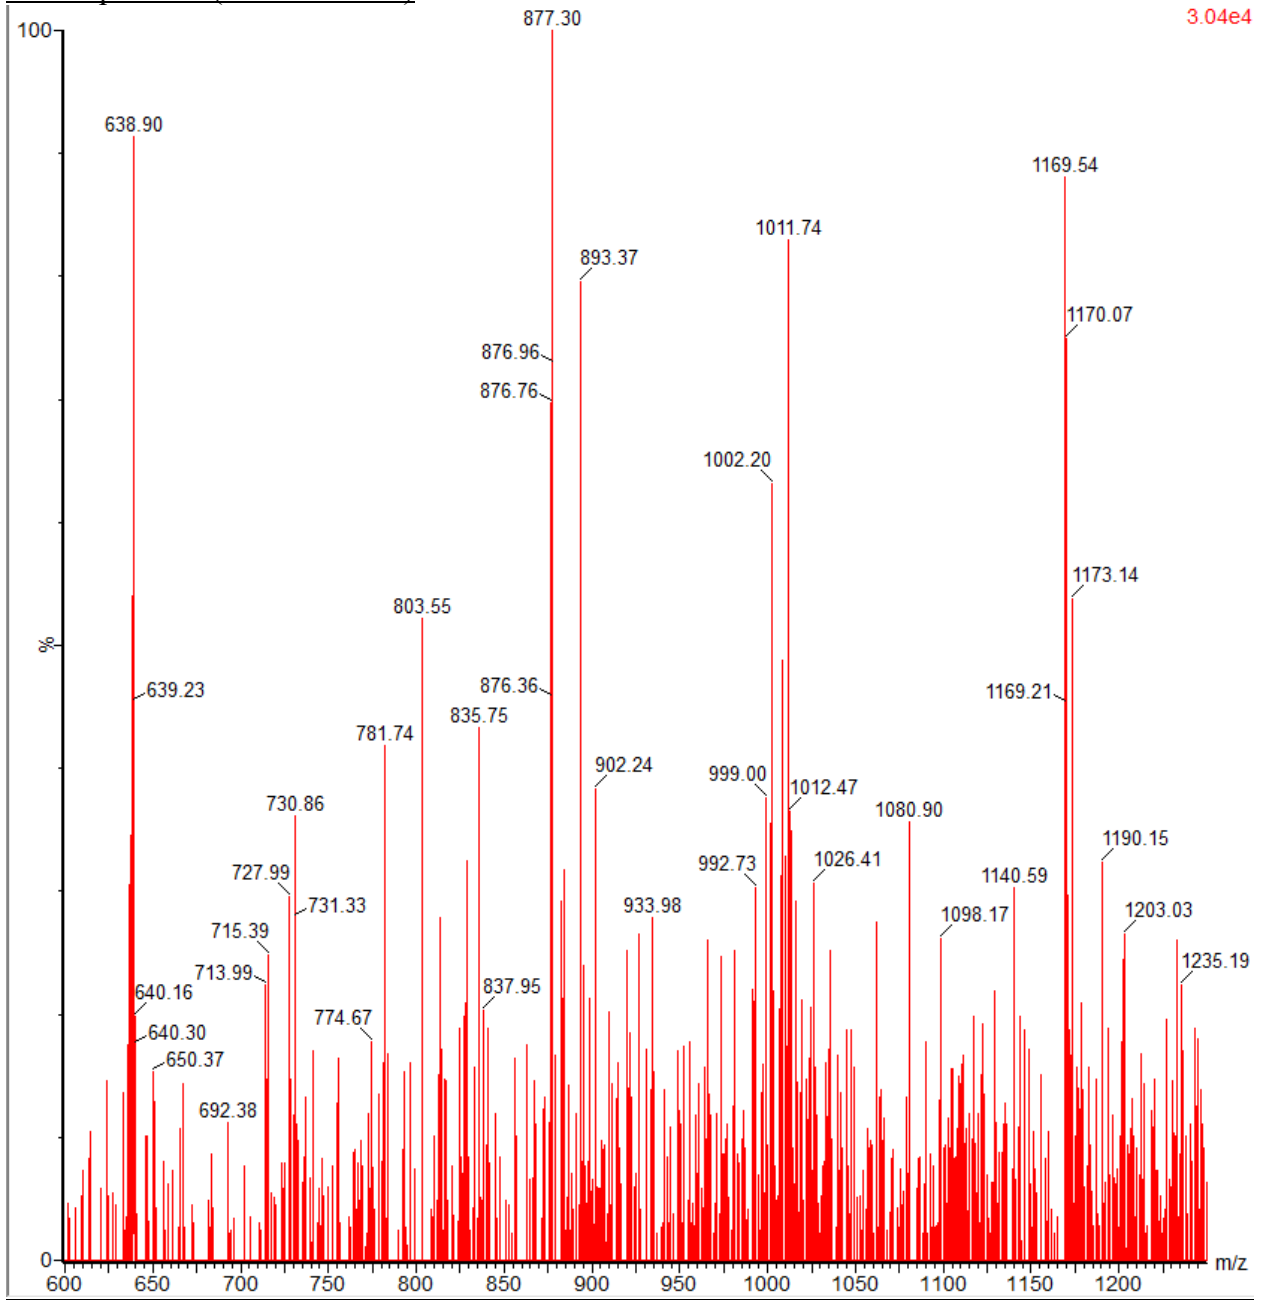

Deconvoluted Mass Spectrum

2.32e4

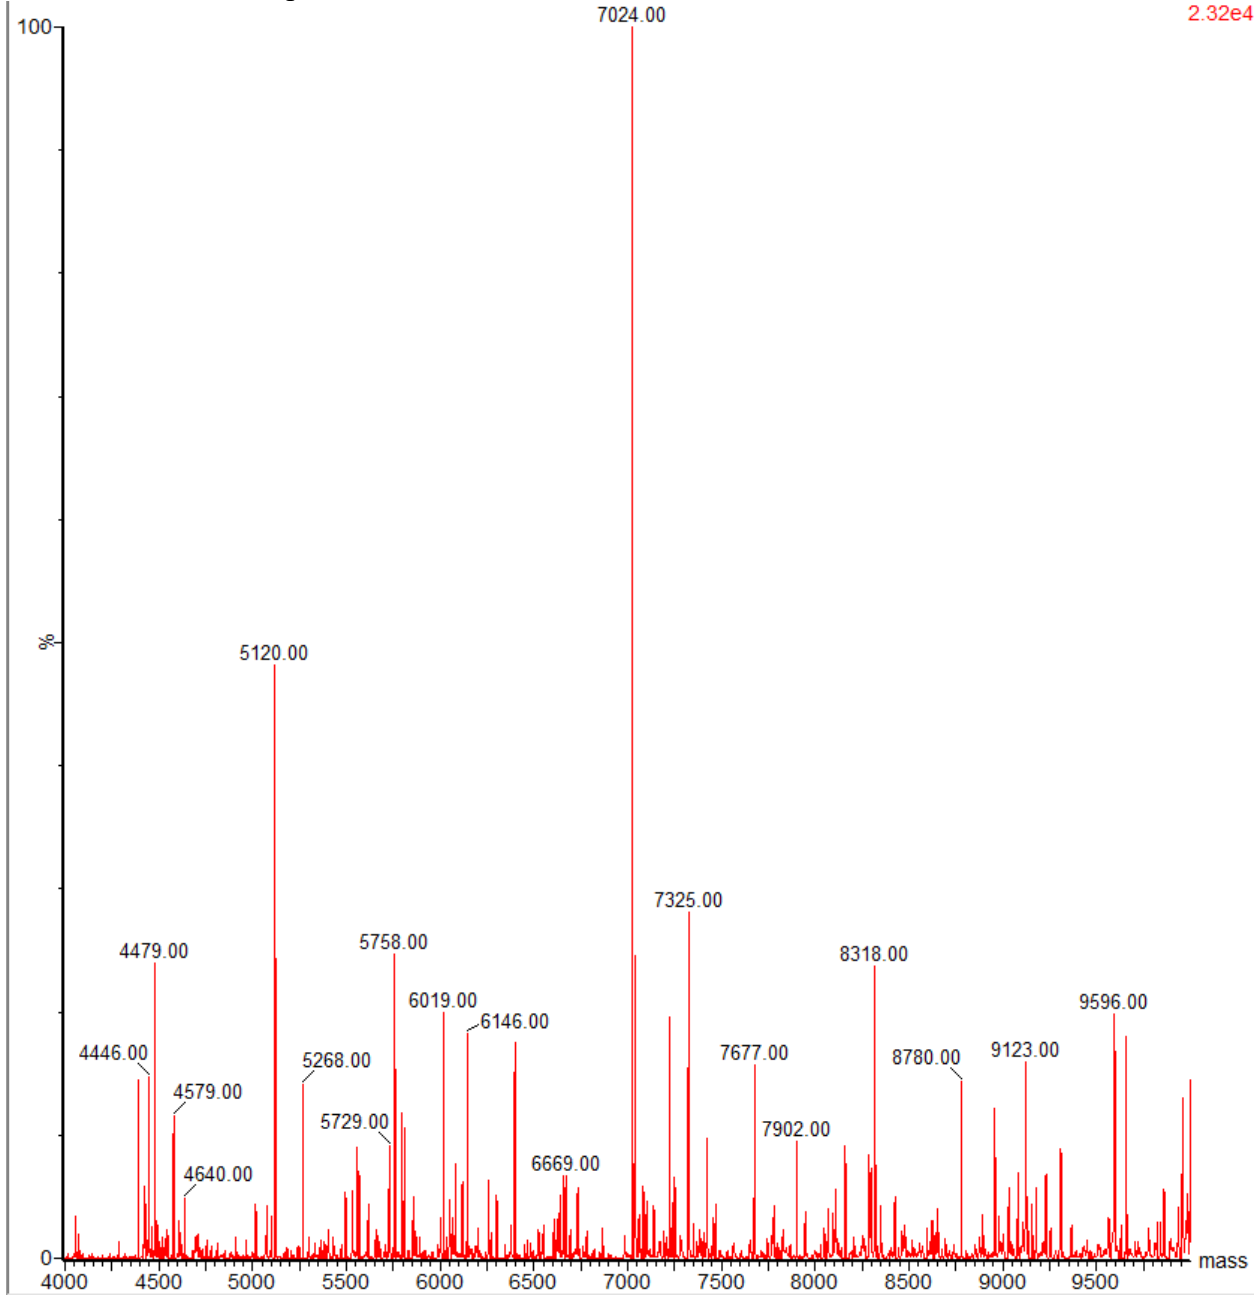

**Entry 10: 5'**

LCMS Characterization of **3**

Produced from **1** by General Procedure **2**:

Conversion (A260): trace

Expected Mass: 7023.61

Expected (M-6)/6 Ion: 1169.60

Found Deconvoluted Mass: 7023.00

Found (M-6)/6 Ion: 1169.34

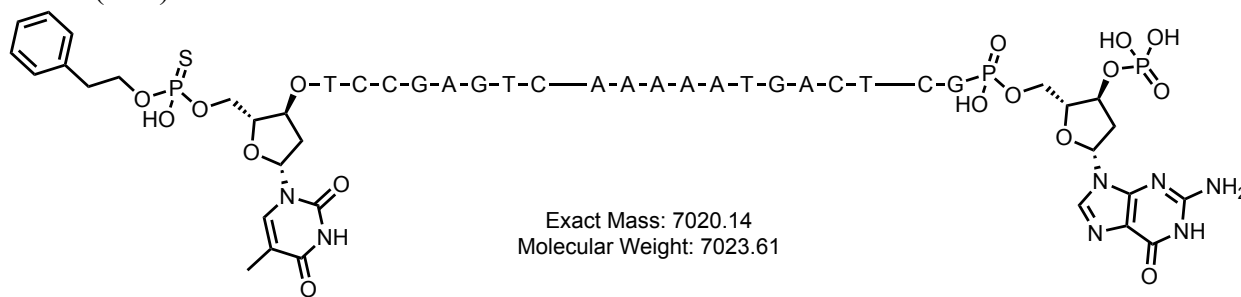

**A260 Chromatogram**

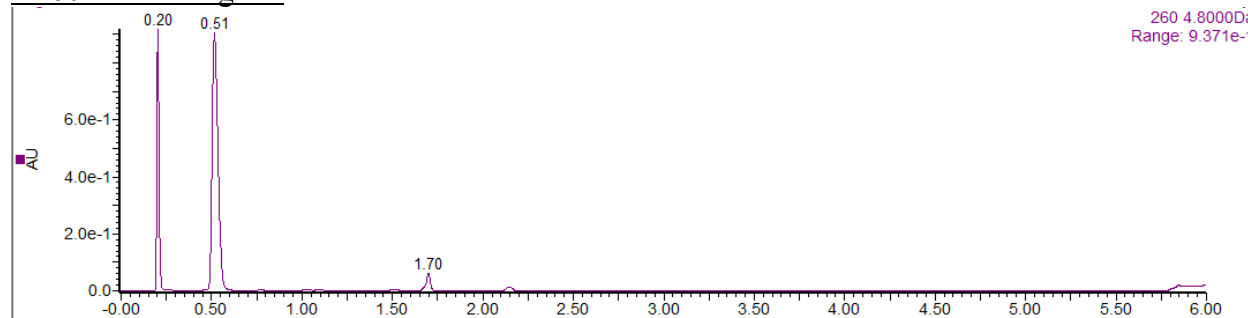

Mass Spectrum (RT= 1.70 min)

4.45e4

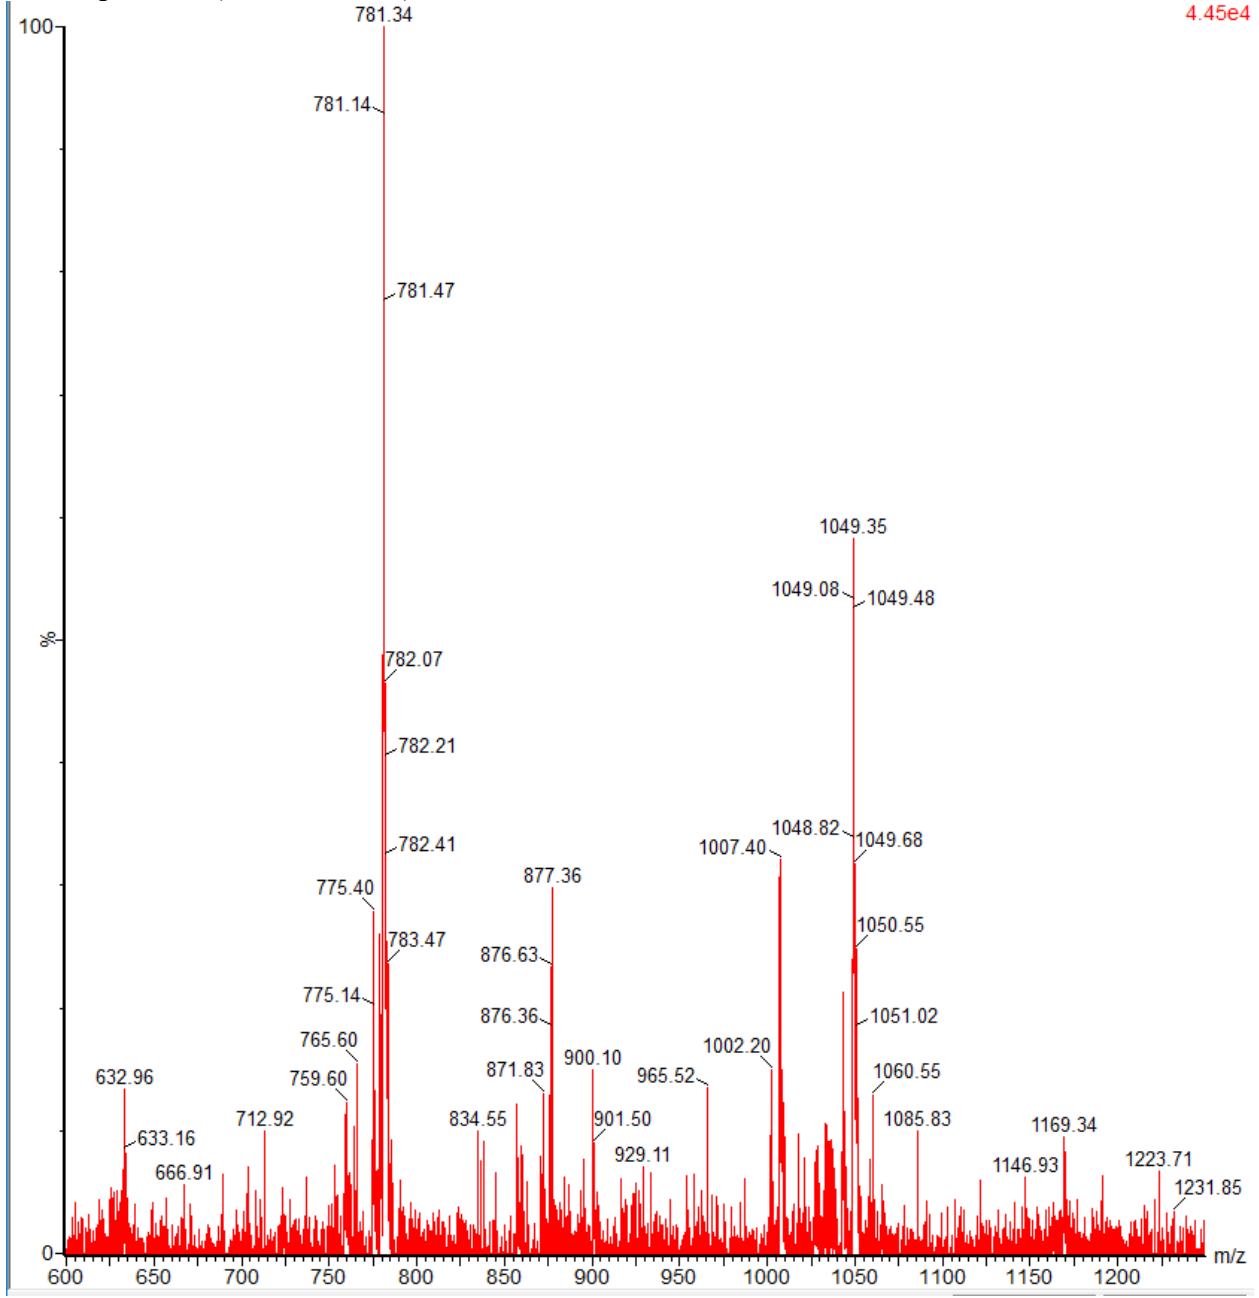

Deconvoluted Mass Spectrum

2.42e4

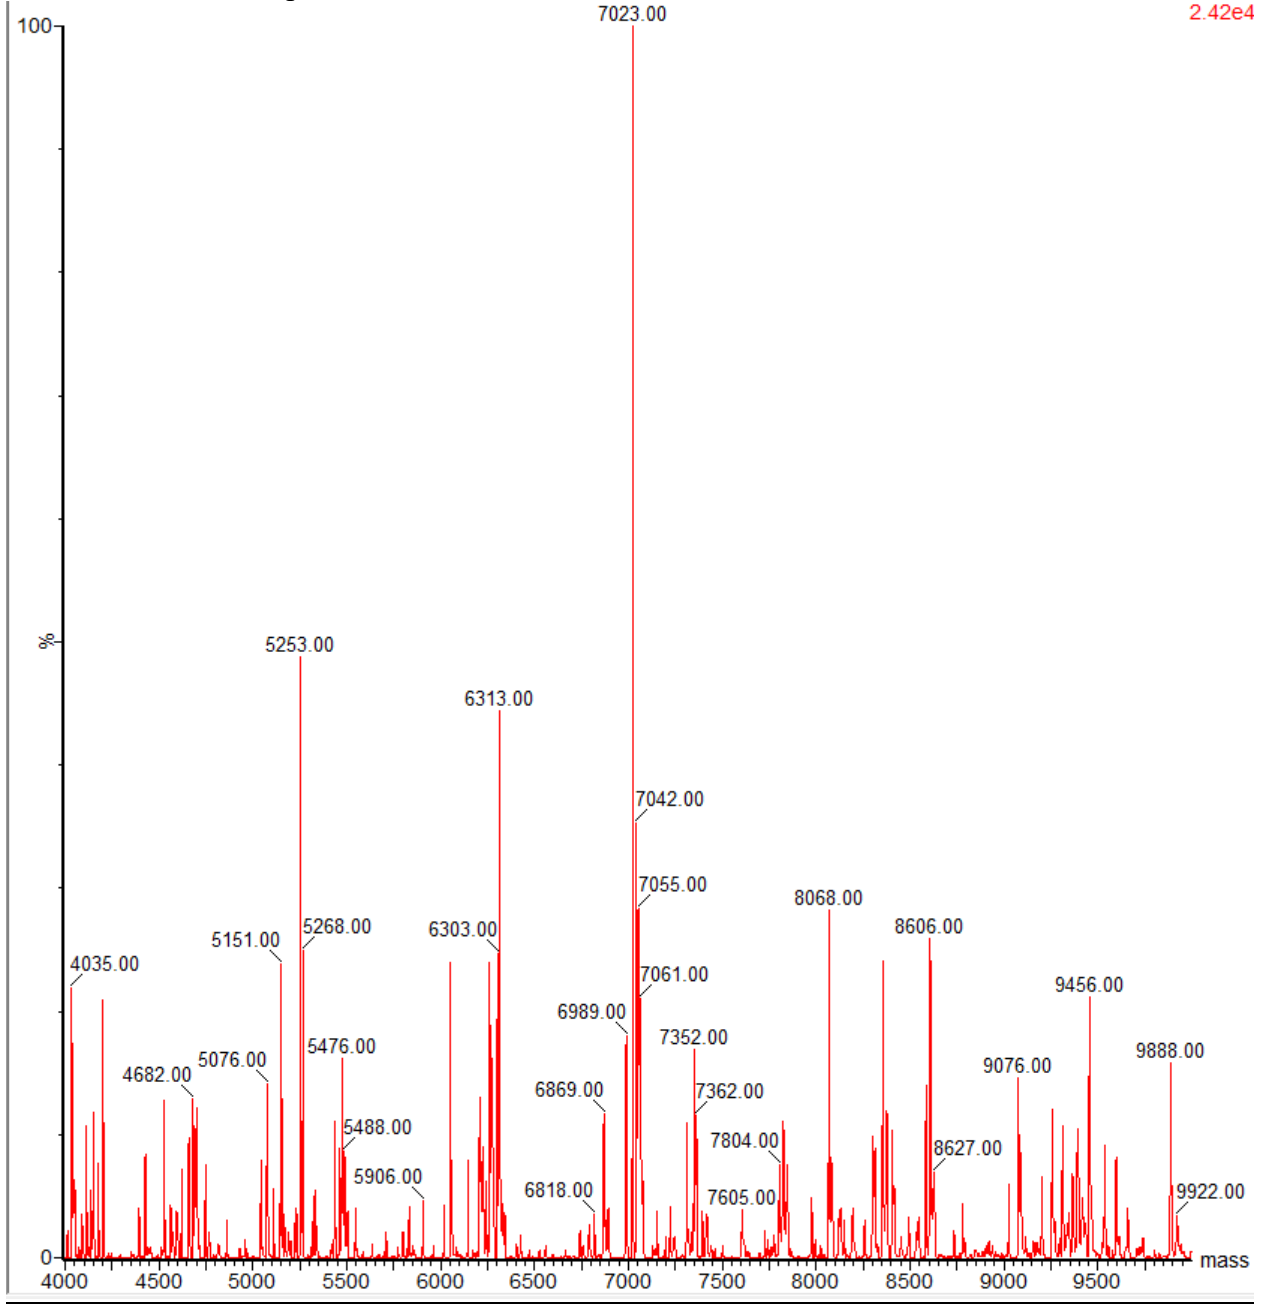



**Entry 10: 3'**

LCMS Characterization of **4**

Produced from **2** by General Procedure **2**:

Conversion (A260): trace

Expected Mass: 7023.61

Expected (M-6)/6 Ion: 1169.60

Found Deconvoluted Mass: 70234.00

Found (M-6)/6 Ion: 1169.27



A260 Chromatogram

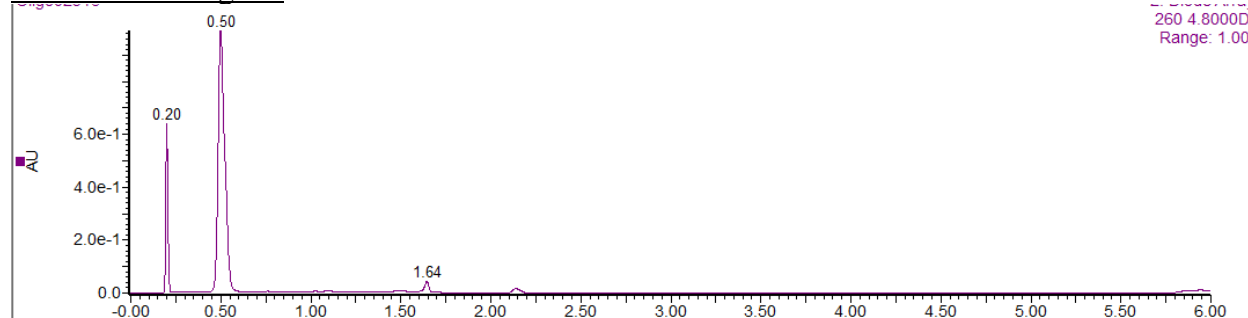

Mass Spectrum (RT= 1.64 min)

7.19e4

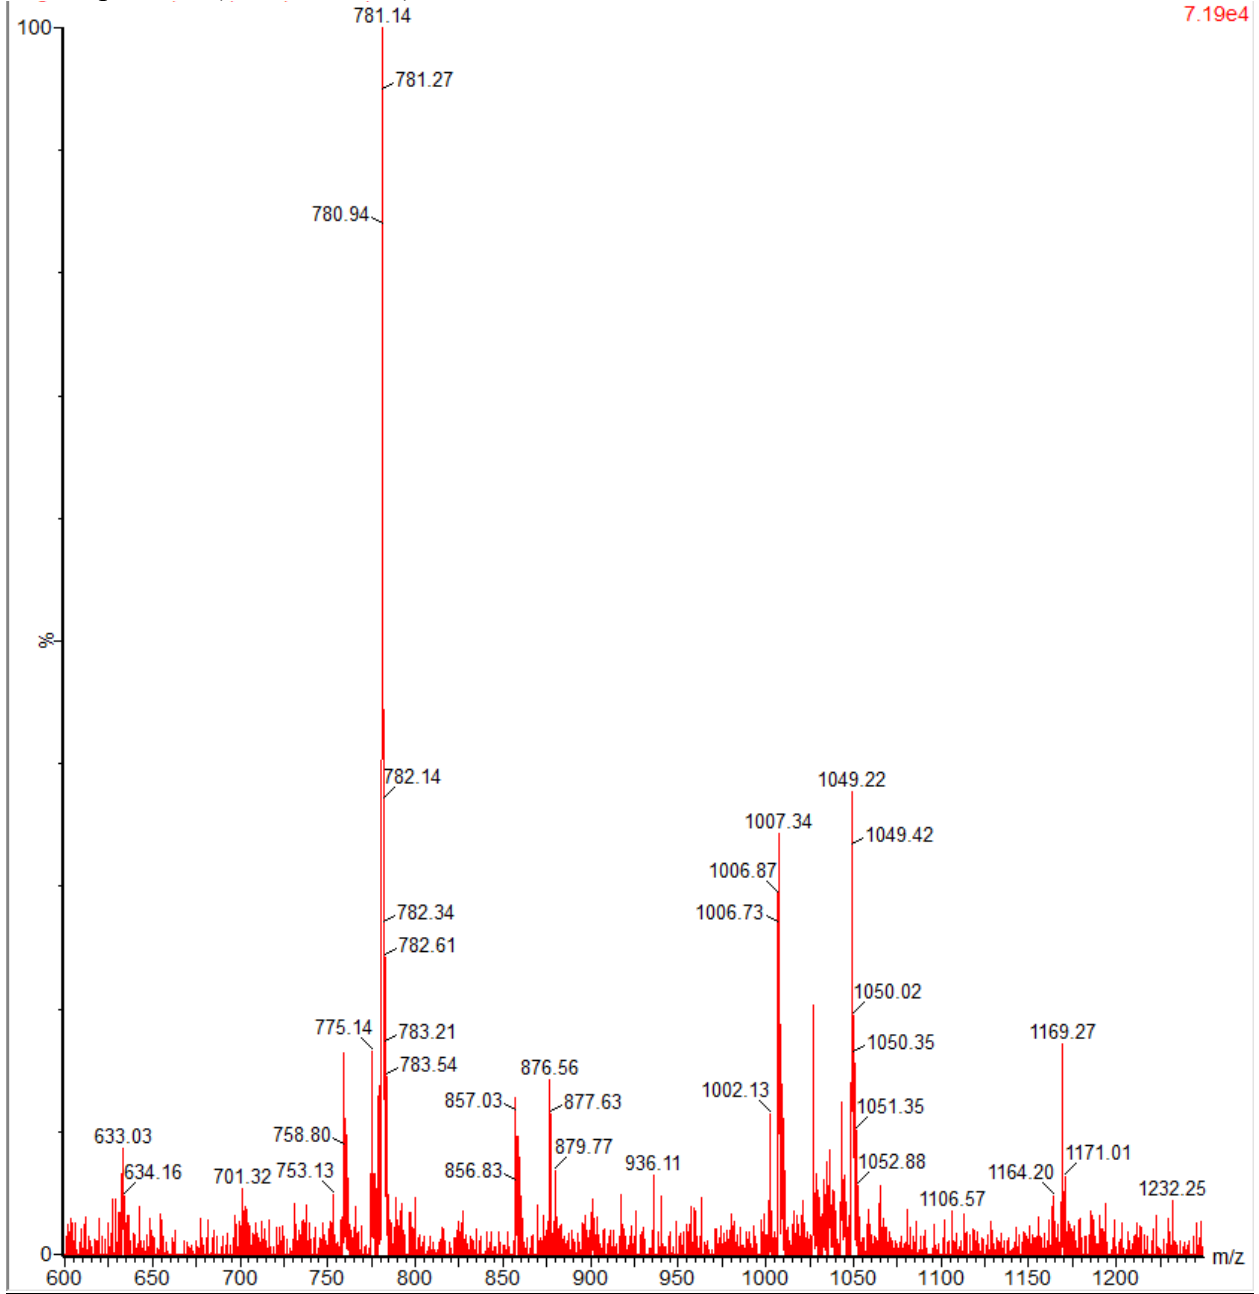

# Deconvoluted Mass Spectrum

7.19e4

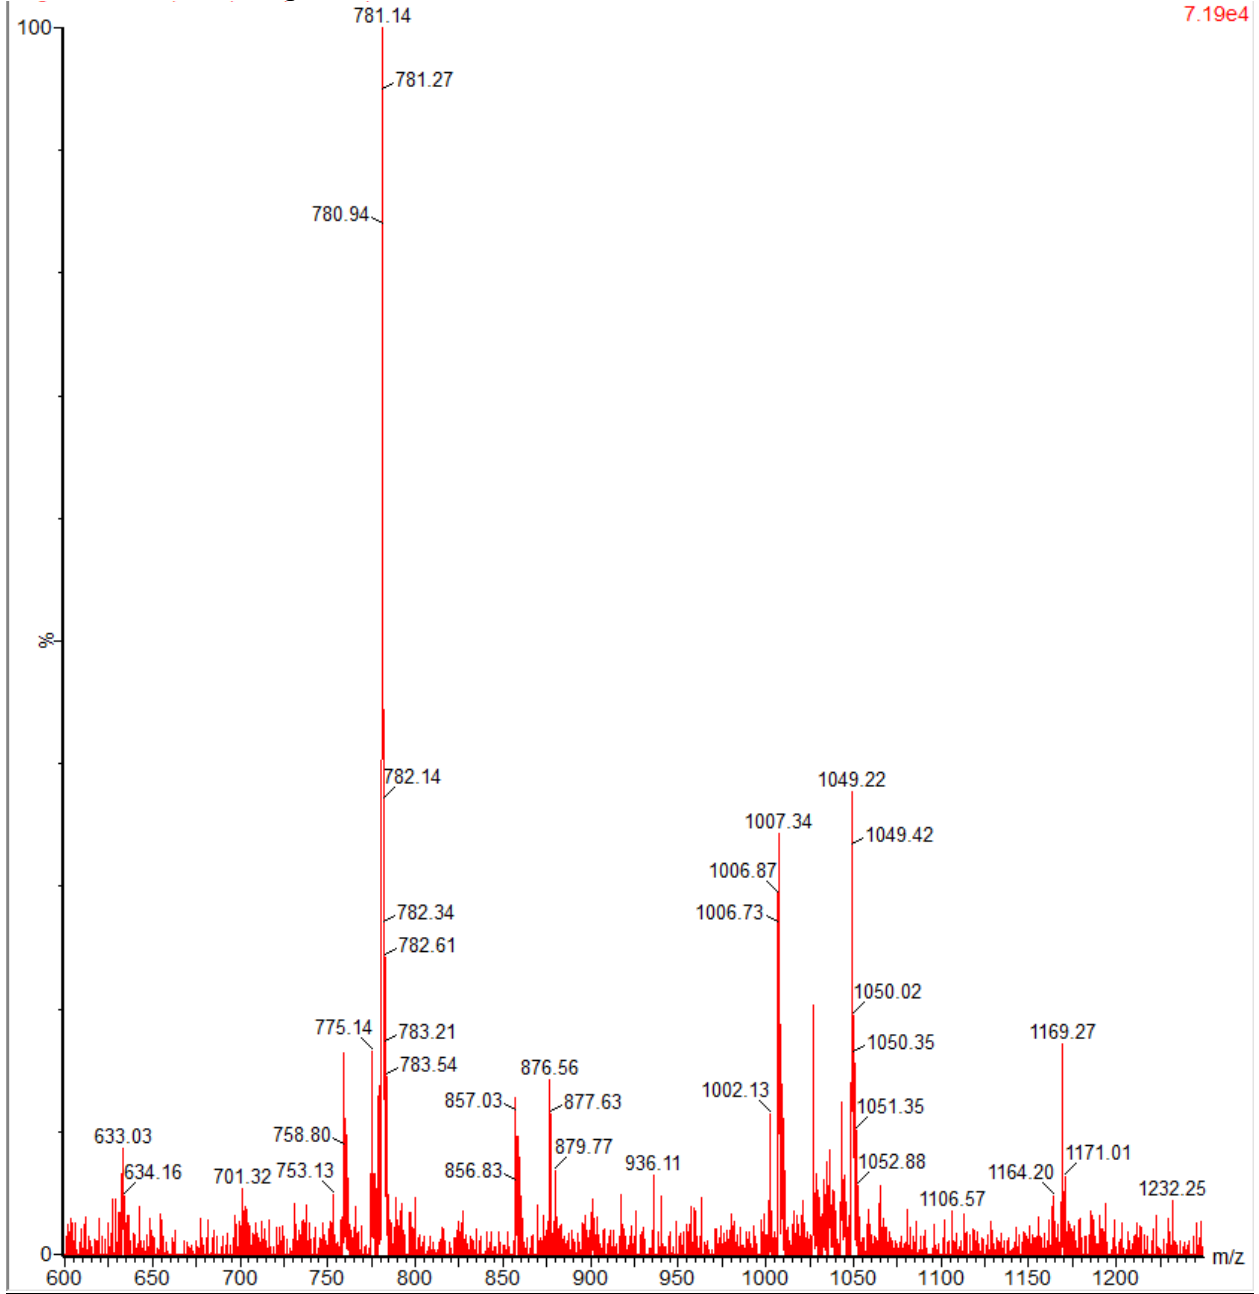

## SENDR on High T<sub>m</sub> Hairpin

Hairpin oligo **SI-17** was incubated for 10 minutes at either RT or 66°C in 100  $\mu$ L PBS. This solution was pipetted directly onto washed support (50  $\mu$ L) and quickly vortexed. The reactions were allowed to cool to room temperature before washing and drying was performed according to general procedure 2. SENDR derivatization was performed under standard conditions.

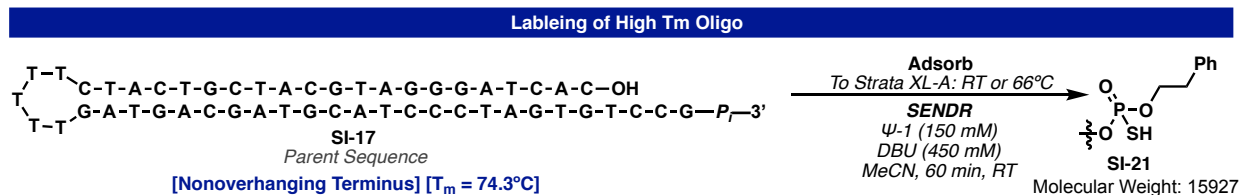

| Optimization |                |                |
|--------------|----------------|----------------|
| Entry        | Conditions     | Conversion (%) |
| 1            | Adsorb at RT   | 63             |
| 2            | Adsorb at 66°C | 70             |

Entry 1:

LCMS Characterization of **SI-21**

Produced from **SI-17**:

Conversion (A260): 63%

Retention Time: 2.29 min

Expected Mass: 15927.31

Found Deconvoluted Mass: 15930

5'-C-A-C-T-A-G-G-G-A-T-G-C-A-T-C-G-T-C-A-T-C-T-T-T-T-G-A-T-G-A-C-G-A-T-G-C-A-T-C-

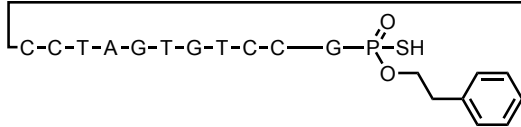

Molecular Weight: 15927.31

A260

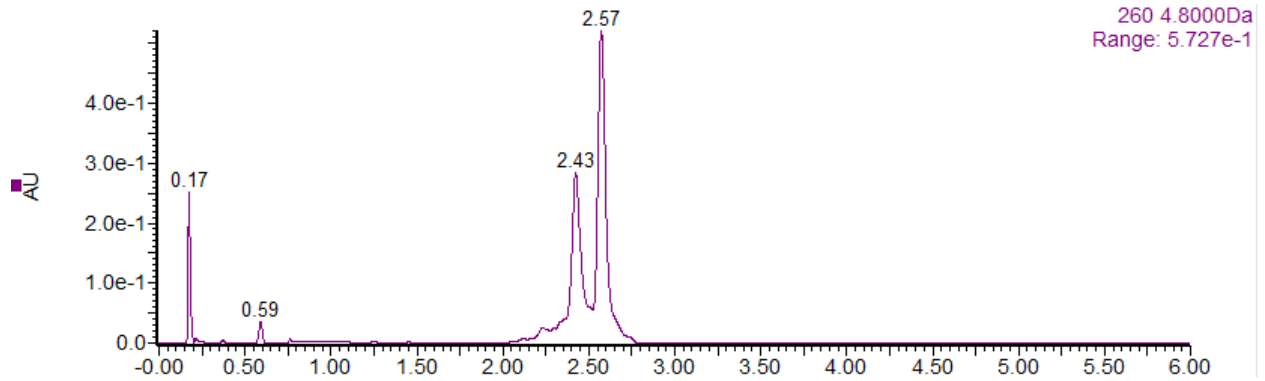

TIC

Oligo03592

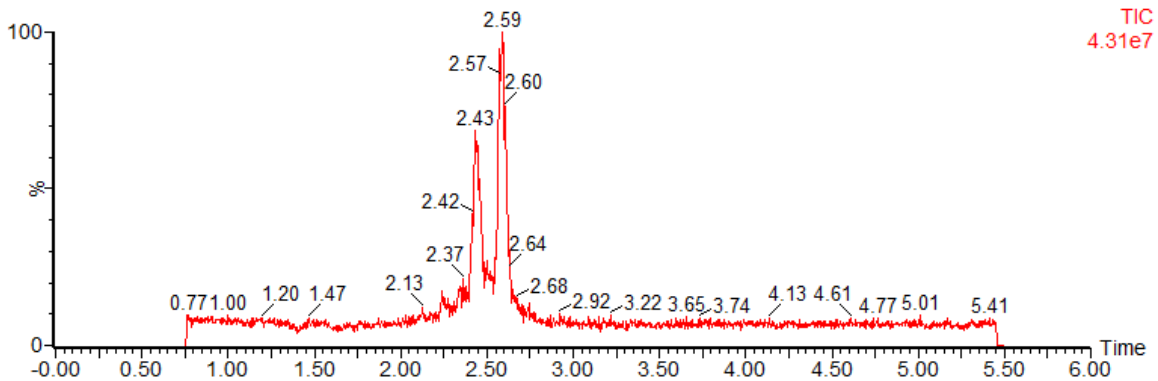

Raw Mass Spectrum Retention Time 2.57 minutes

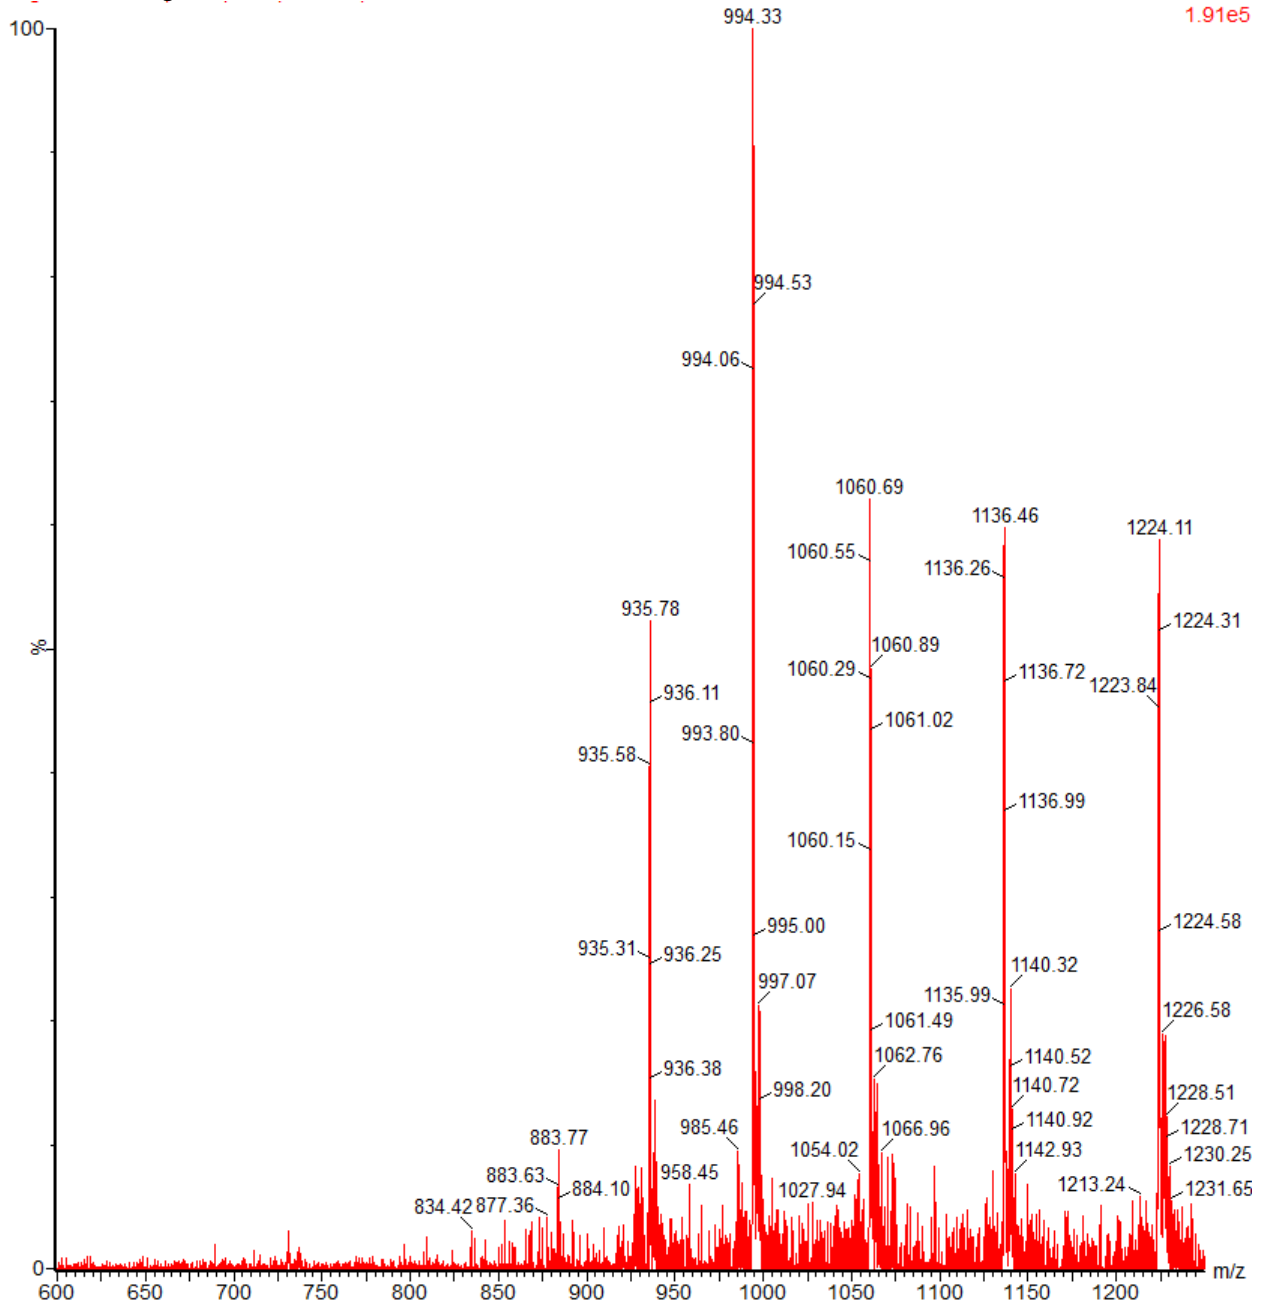

Deconvoluted Mass Spectrum Retention Time 2.57 Minutes

1.14e6

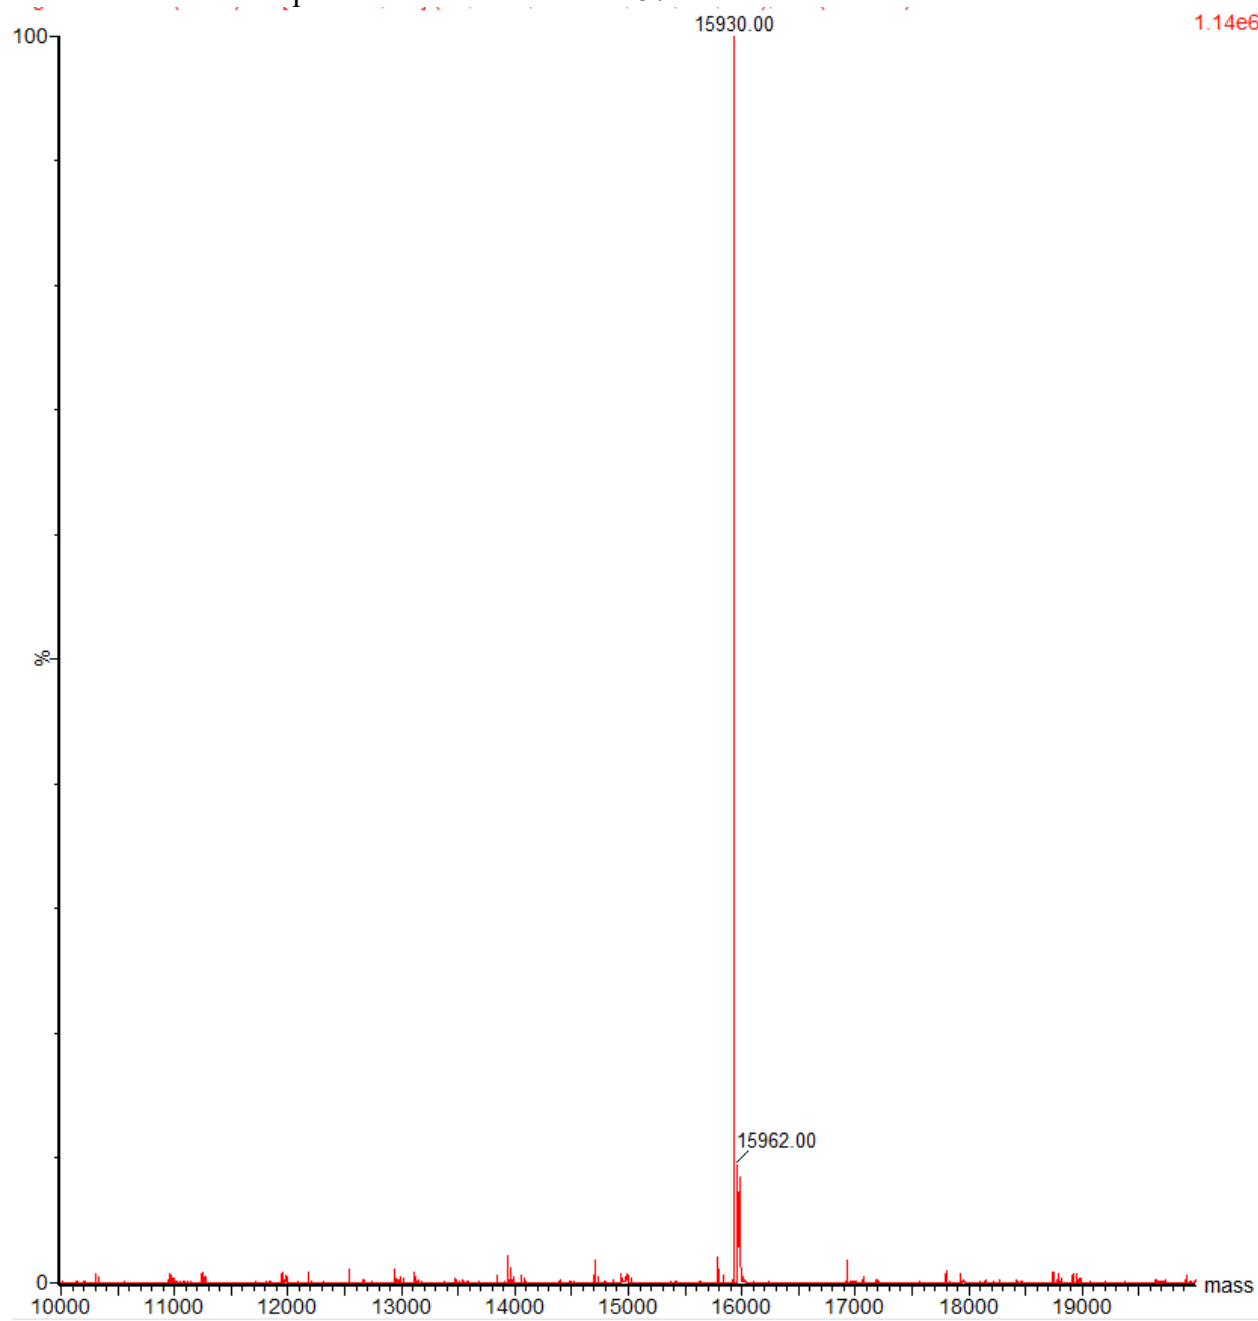

Entry 2:

LCMS Characterization of **SI-21**

Produced from **SI-17**:

Conversion (A260): 70%

Retention Time: 2.29 min

Expected Mass: 15927.31

Found Deconvoluted Mass: 15928

5'-C-A-C-T-A-G-G-G-A-T-G-C-A-T-C-G-T-C-A-T-C-T-T-T-T-G-A-T-G-A-C-G-A-T-G-C-A-T-C-

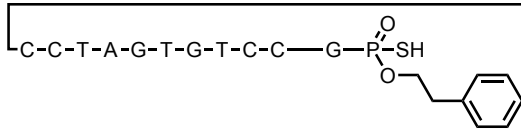

Molecular Weight: 15927.31

A260

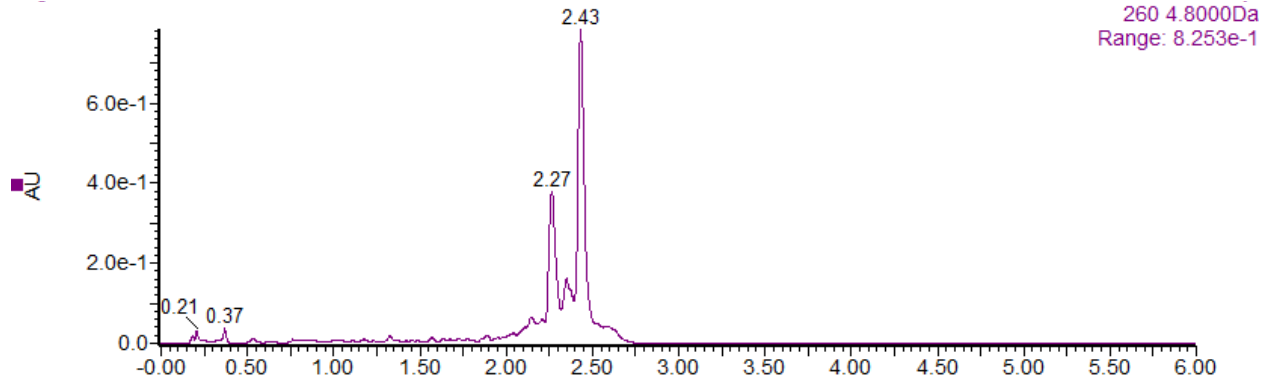

TIC

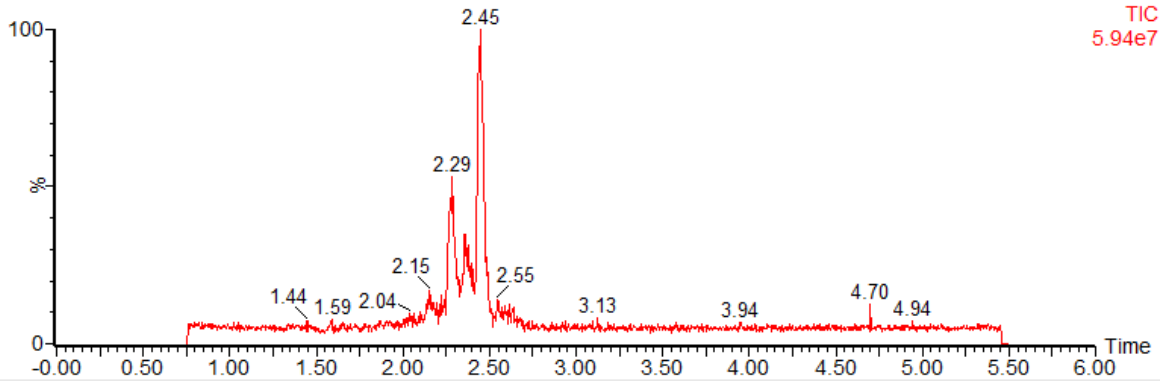



Raw Mass Spectrum Retention Time 2.57 minutes

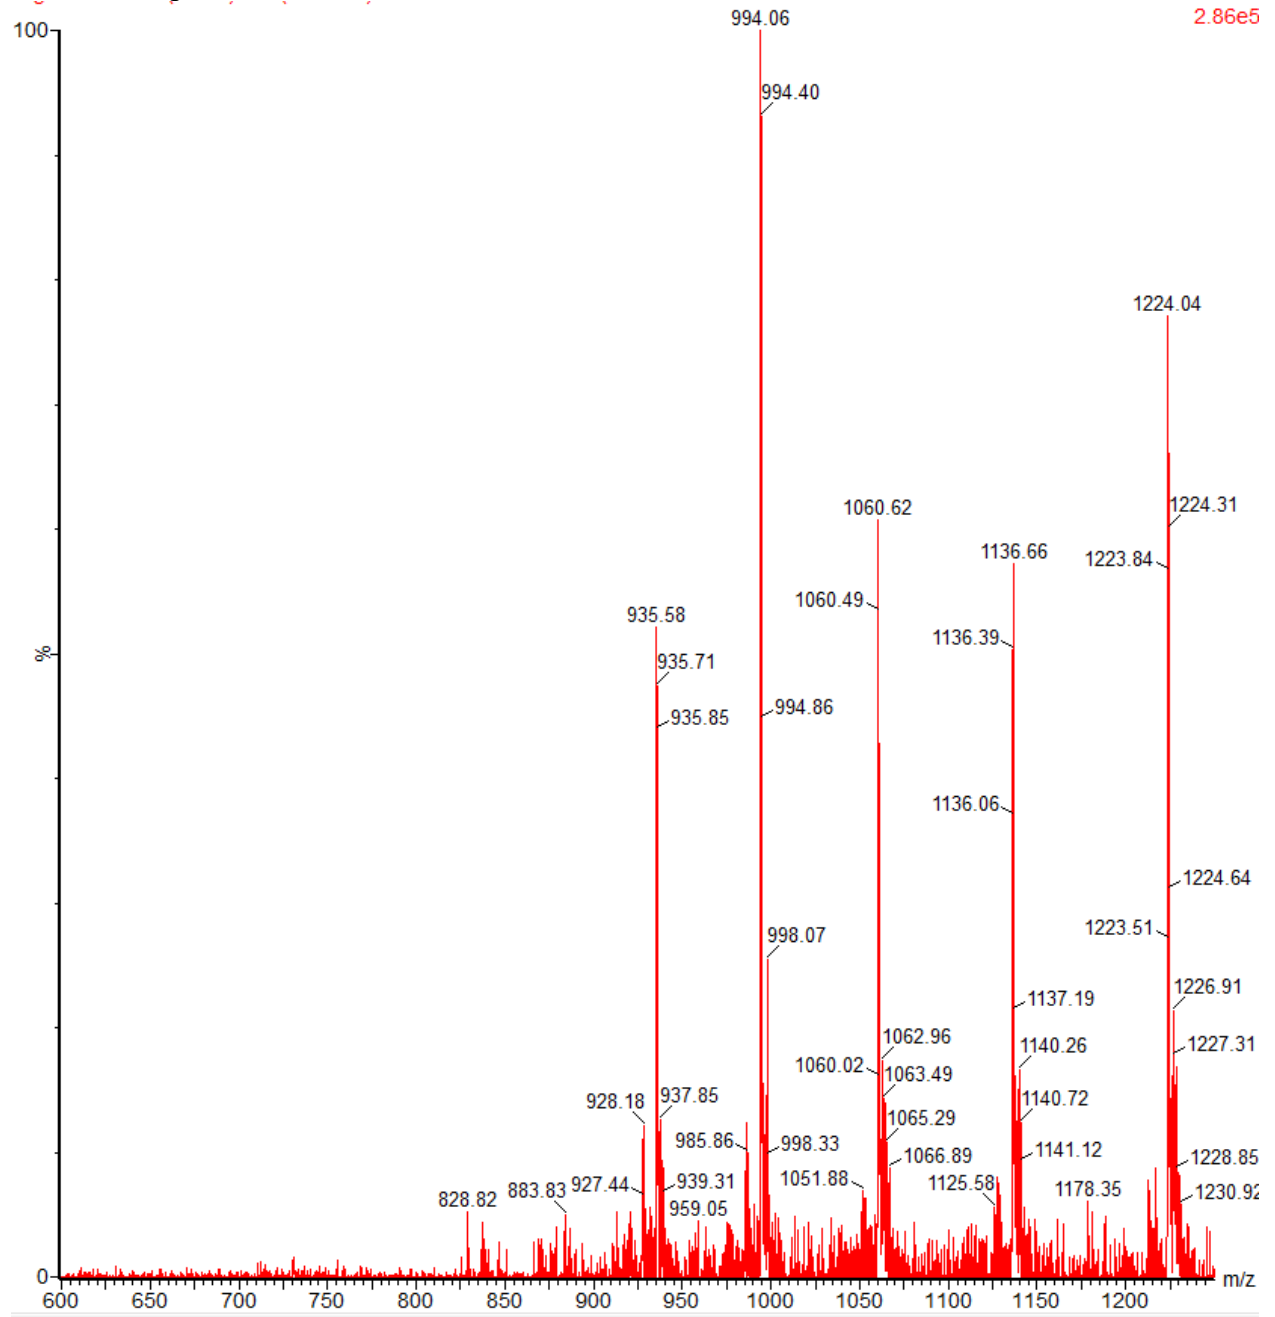

Deconvoluted Mass Spectrum Retention Time 2.57 Minutes

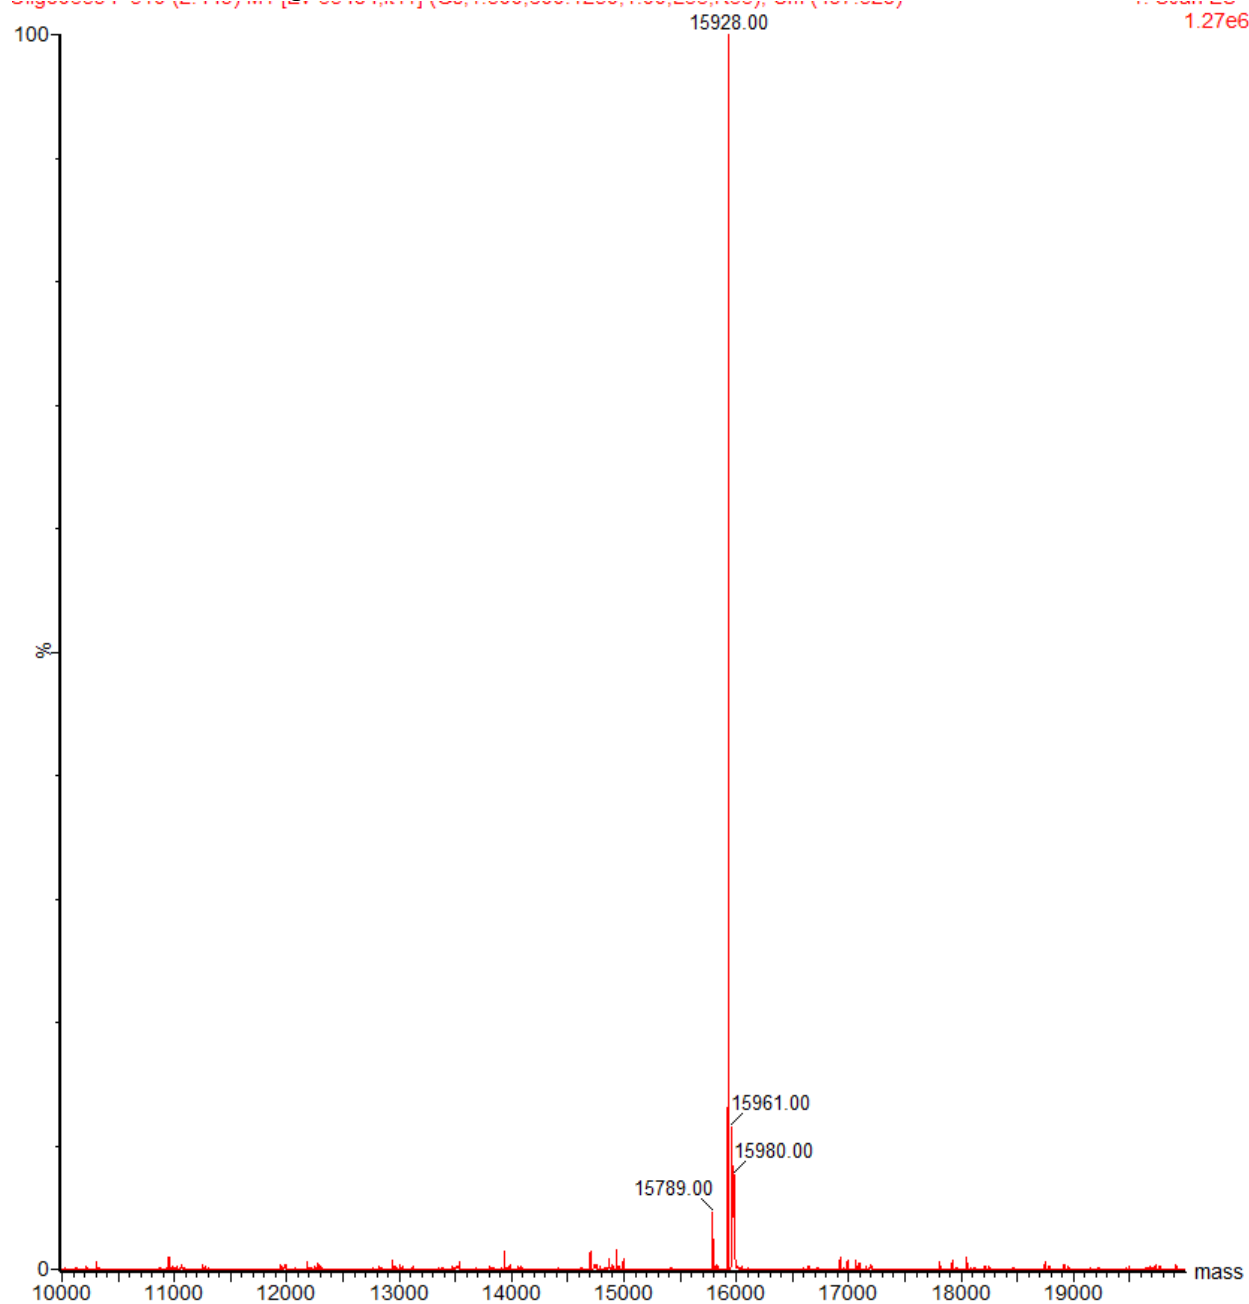

1.27e6

---

## Alcohol Selective Reactions: An Investigation

---

### Phosphoramidate Formation

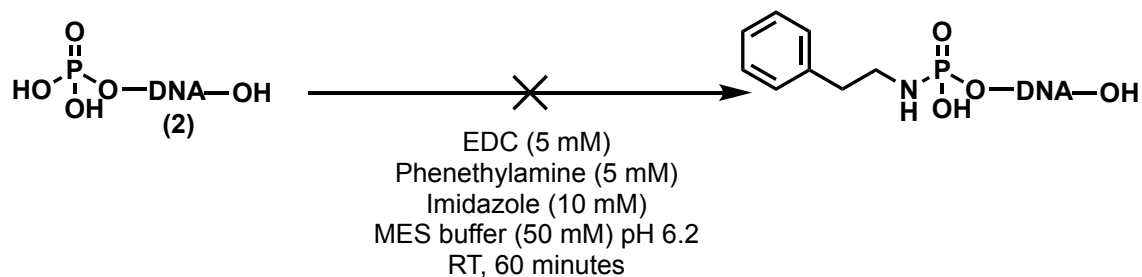

DNA 2 was dissolved (90  $\mu\text{M}$ ) in MES buffer (50 mM) at pH 6.2 containing phenethylamine (5 mM) and imidazole (20 mM). To this solution was added EDC (10  $\mu\text{L}$ ) from a stock solution in DMA (50 mM). This reaction was quickly vortexed and allowed to incubate at room temperature for 60 minutes. After 60 minutes the DNA was isolated by ethanol precipitation (previously described) and analyzed by LCMS.

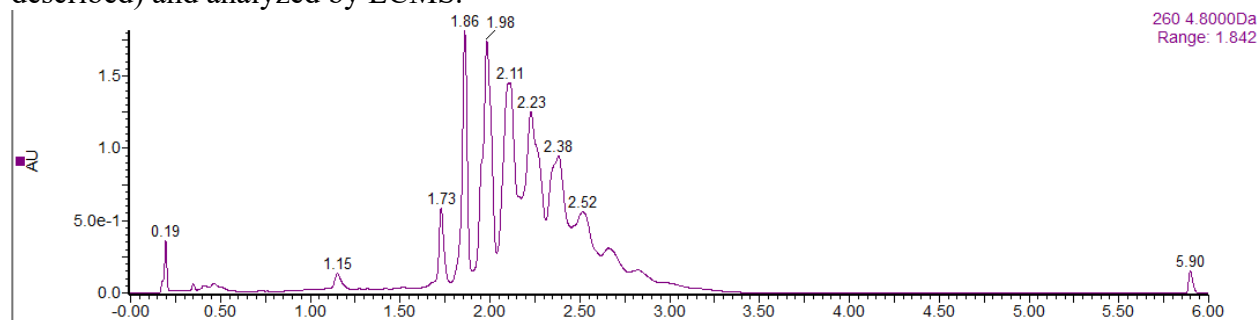

## Phosphoramidite Reaction

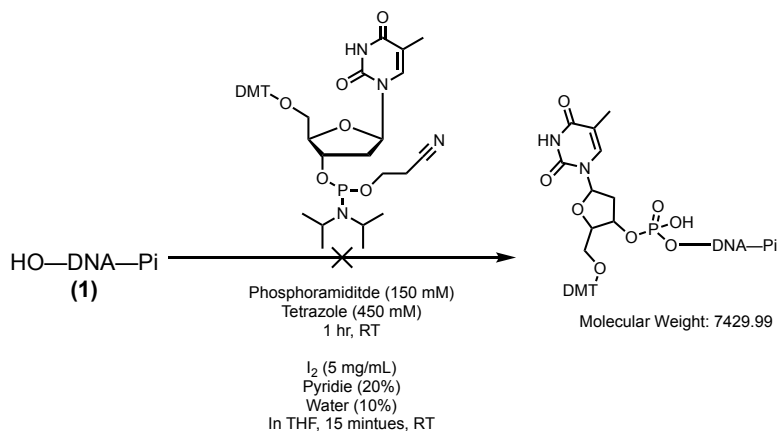

DNA 1 was loaded onto the support according to **General Procedure 2** and dried accordingly. Phosphoramidite (150 mM) and tetrazole (450 mM) were added in dry MeCN and the reaction was allowed to incubate at room temperature for 60 minutes. After 60 minutes the resin was washed once with dry MeCN (500  $\mu$ L) and oxidation solution was added (iodine, pyridine, water in THF). This reaction was incubated for 15 minutes and then the resin bed was washed with MeCN and PBS. The DNA was eluted and precipitated as previously described and finally analyzed by LCMS.

A260

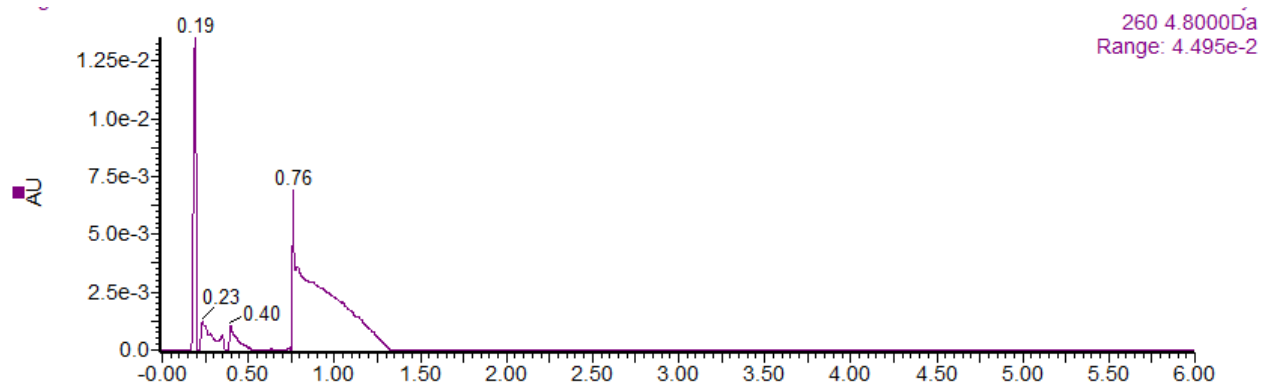

TIC

Oligo03539

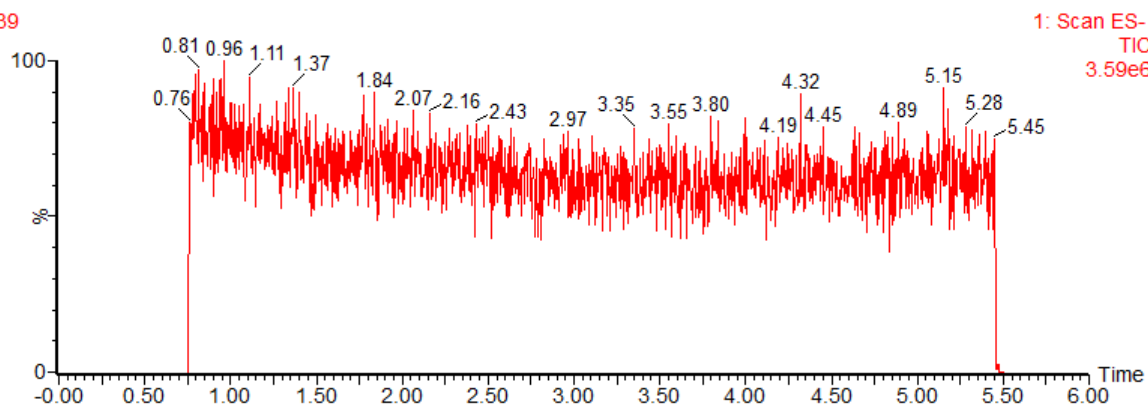

## Tosylation reaction

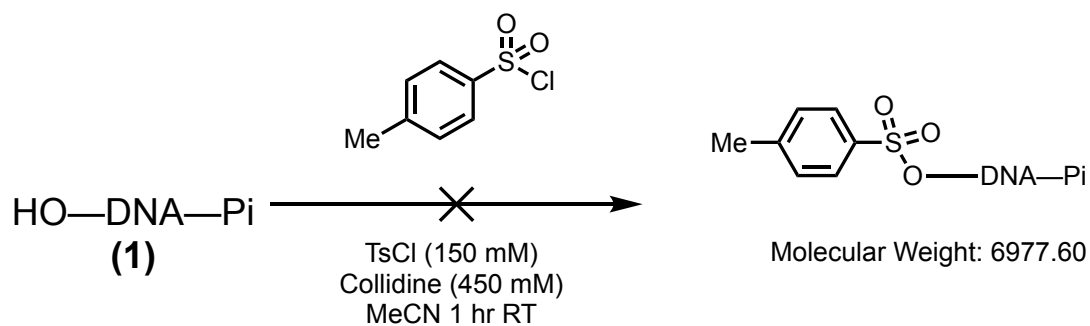

DNA **1** was loaded onto the support according to **General Procedure 2** and dried accordingly. Tosyl Chloride (150 mM) and Collidine (450 mM) were added in dry MeCN and the reaction was allowed to incubate at room temperature for 60 minutes. After 60 minutes the resin was washed once with dry MeCN (500  $\mu$ L). The DNA was eluted and precipitated as previously described and finally analyzed by LCMS.

A260

Oligo03540

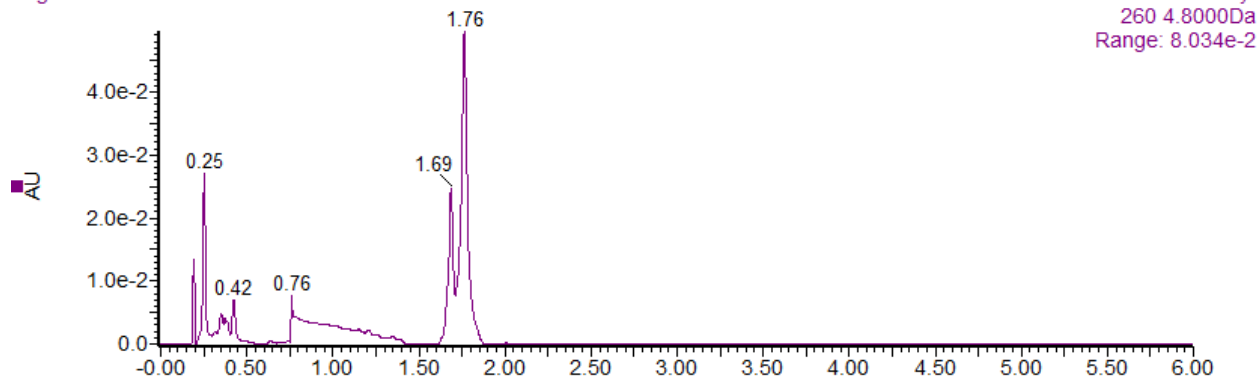

TIC

Oligo03749

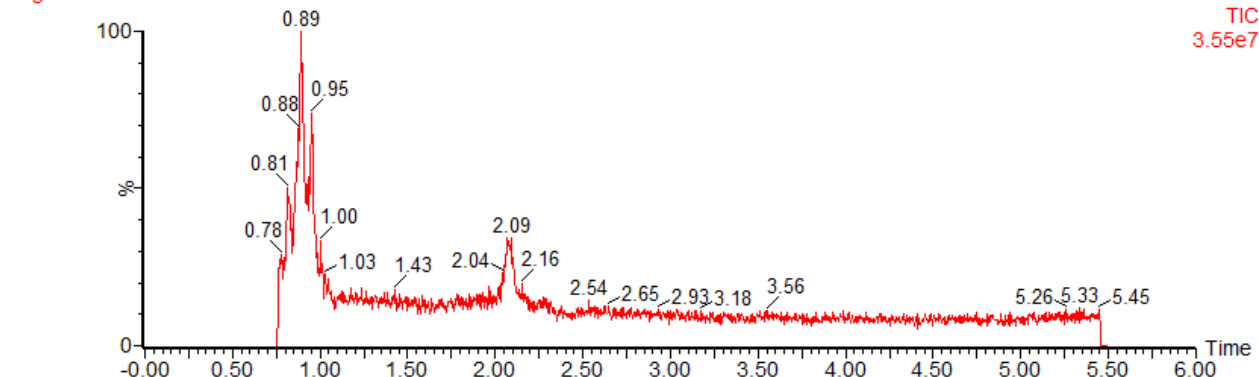

Raw Mass Spectrum RT = 1.73 (Starting material 1)

3.34e4

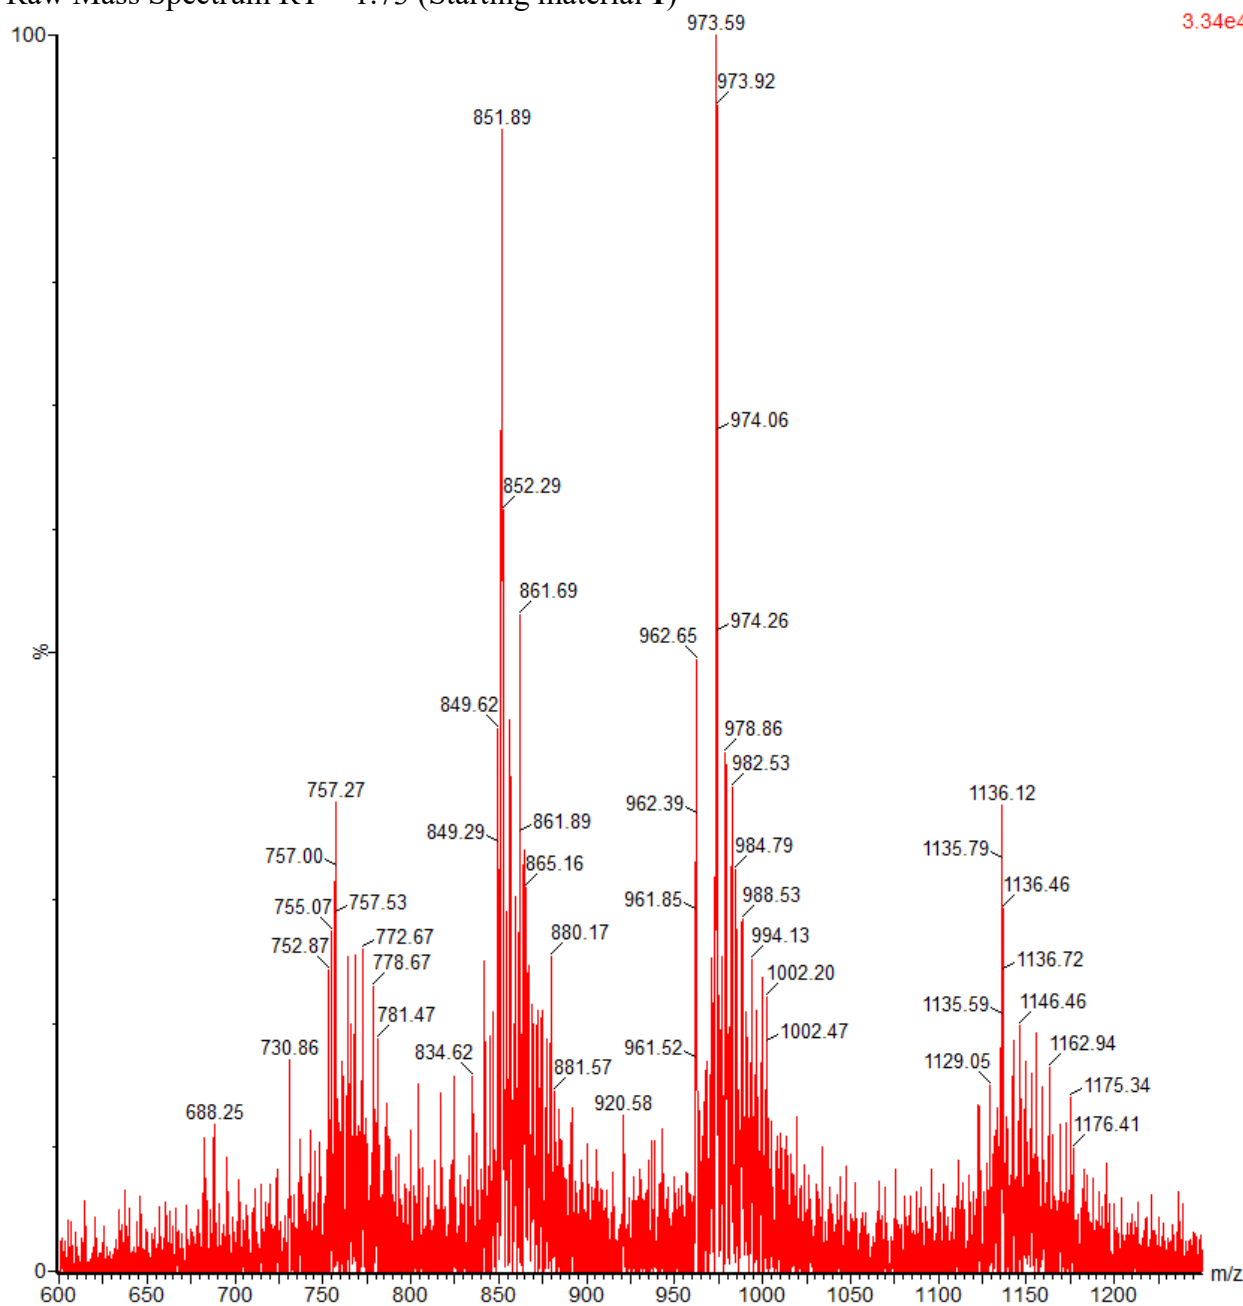

Deconvoluted Mass Spectrum RT = 1.73 (Starting material 1)

2.90e

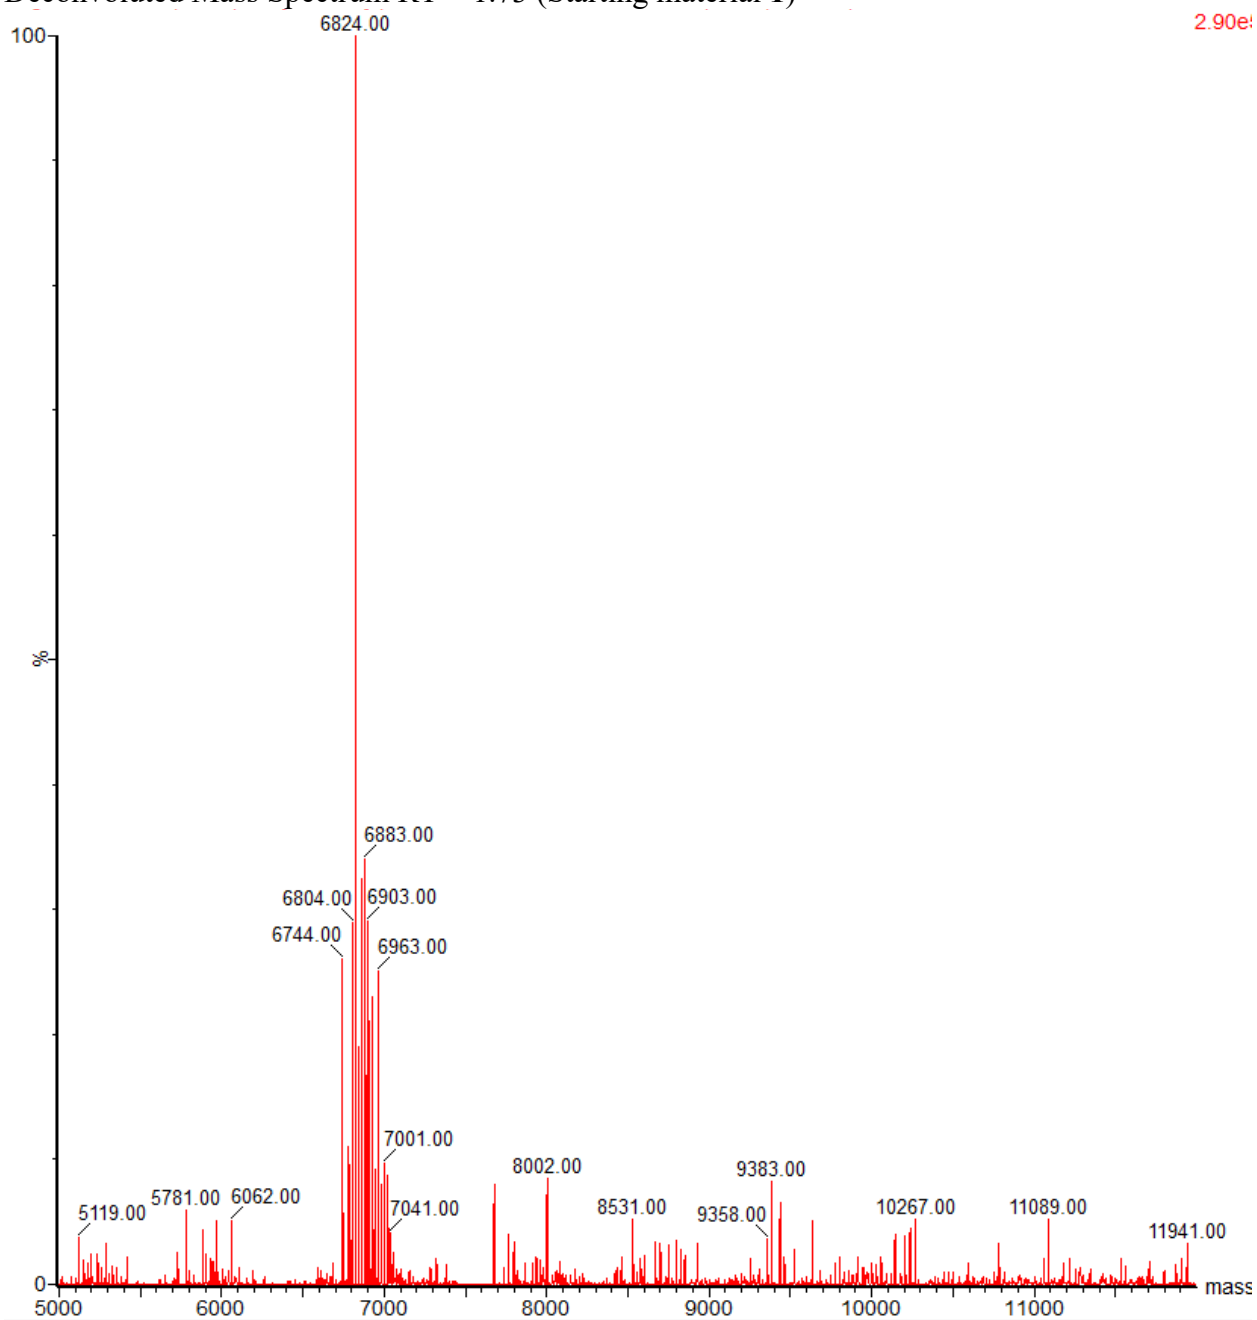

## Mitsunobu Reaction

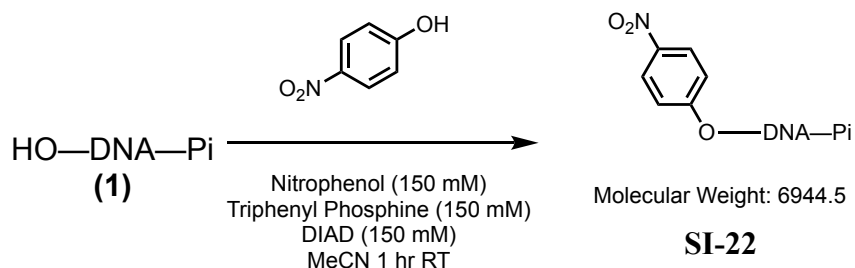

DNA **1** was loaded onto the support according to **General Procedure 2** and dried accordingly. Nitrophenol (150 mM) and Triphenylphosphine (150 mM) were added in dry MeCN. DIAD (150 mM) was then spiked in and the reaction was allowed to incubate at room temperature for 60 minutes. After 60 minutes the resin was washed once with dry MeCN (500  $\mu$ L). The DNA was eluted and precipitated as previously described and finally analyzed by LCMS. Low DNA recovery was observed by UV Vis absorbance (nanodrop).

A260

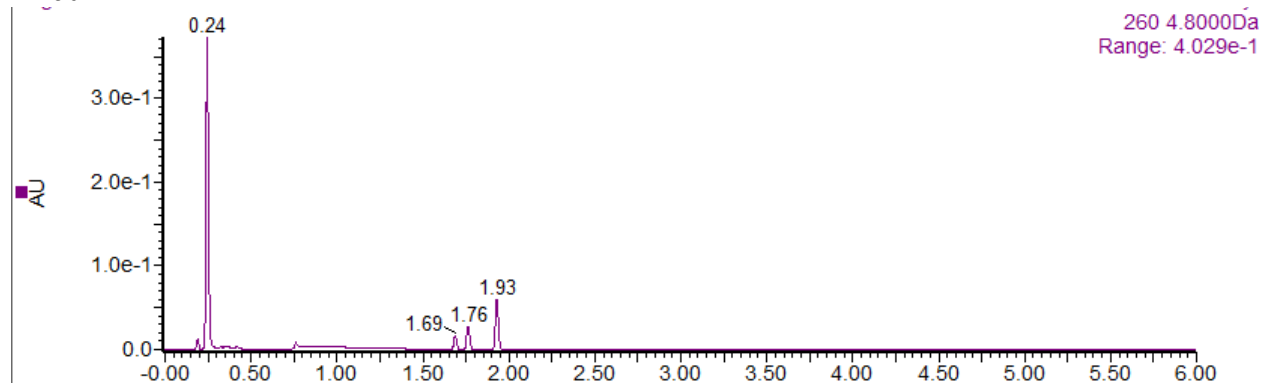

TIC

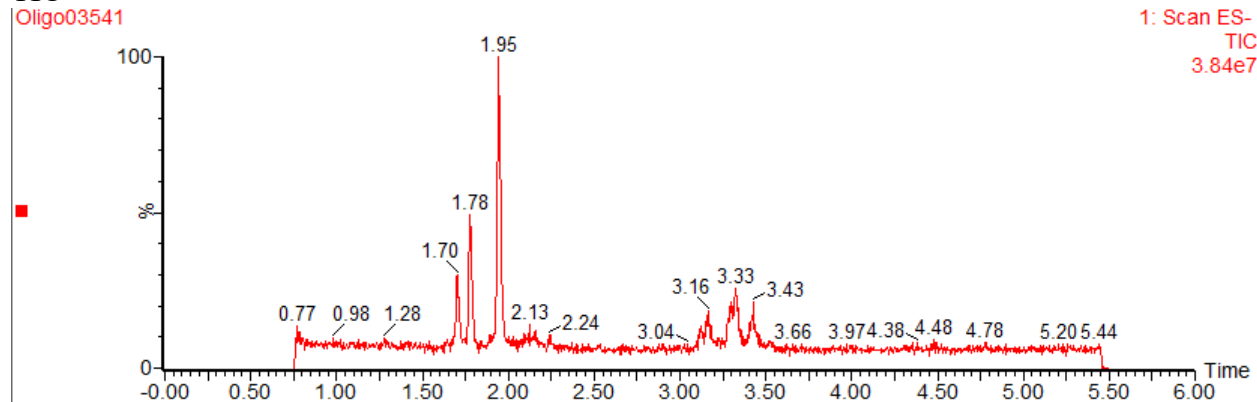



Raw Mass Spectrum RT = 1.93 (SI-22)

1.44e5

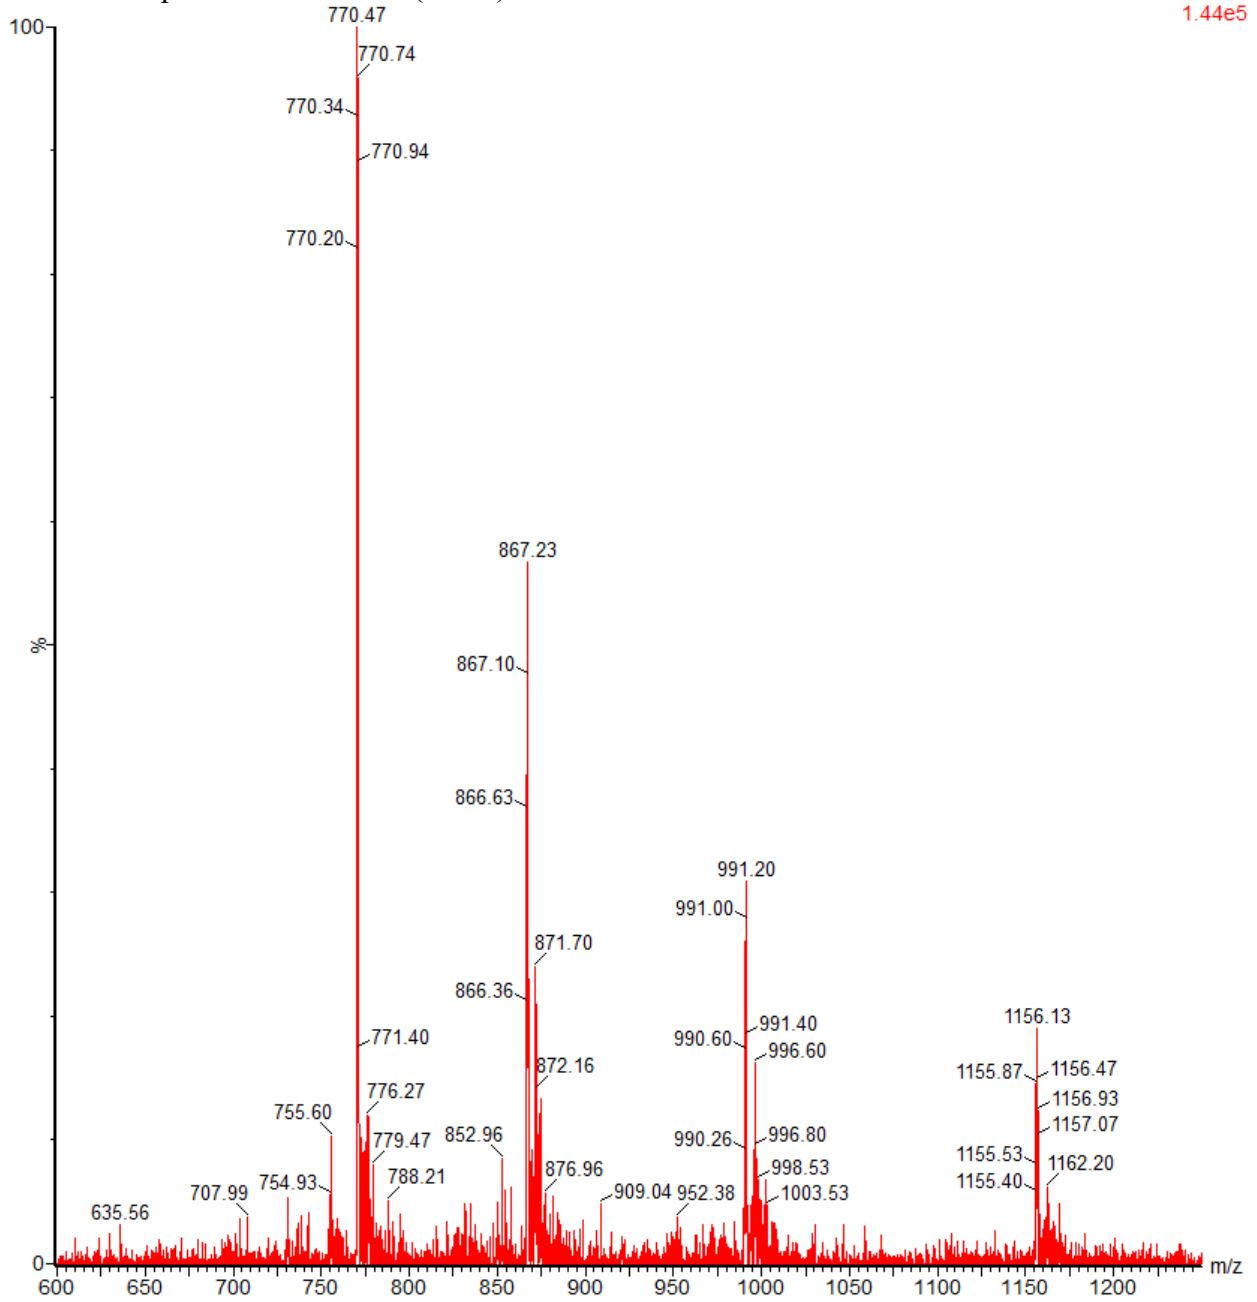

Deconvoluted Mass Spectrum RT = 1.93 (SI-22)

2.82e5

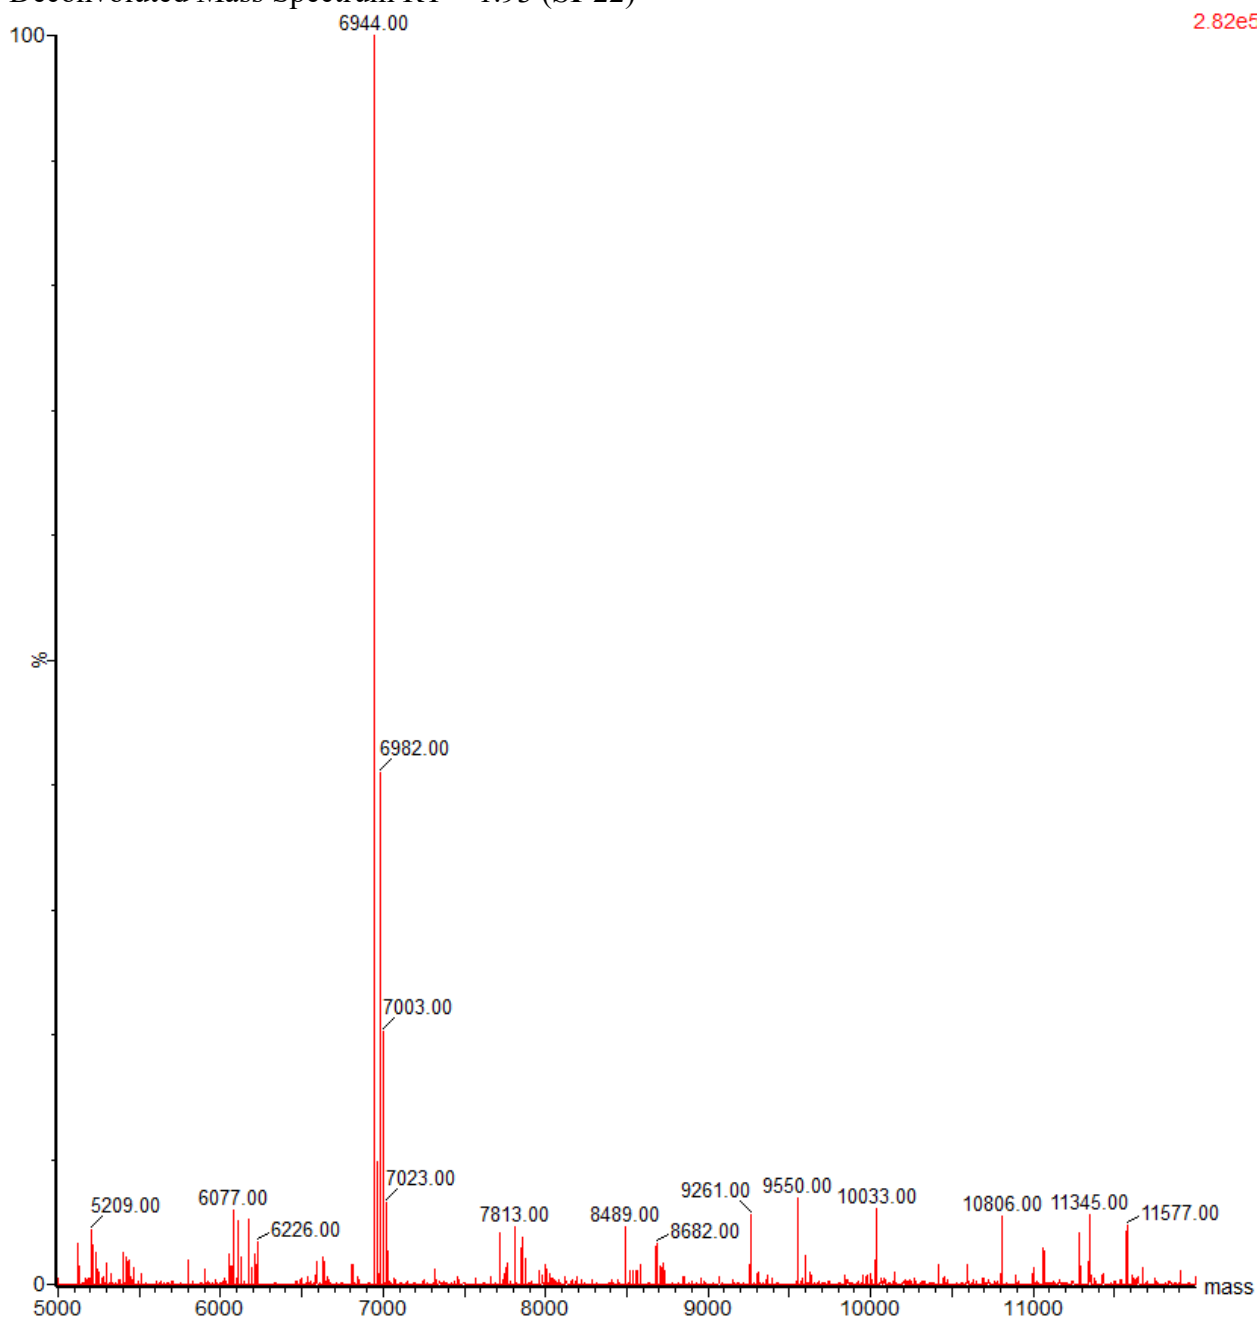

## Williamson Ether Synthesis

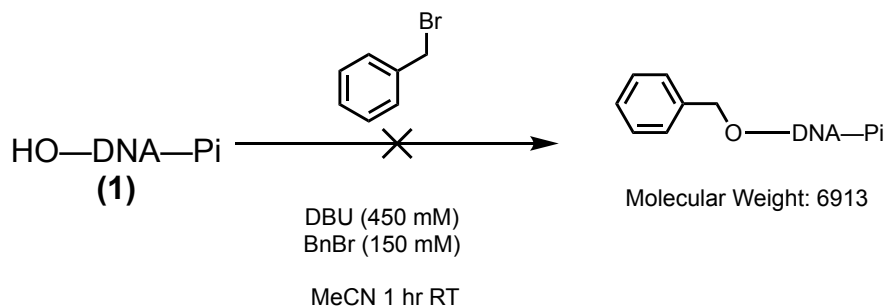

DNA **1** was loaded onto the support according to **General Procedure 2** and dried accordingly. DBU (450 mM) was added in dry MeCN and this was added to the resin from 5 minutes. after 5 minutes benzyl bromide (150 mM) was then spiked in and the reaction was allowed to incubate at room temperature for 60 minutes. After 60 minutes the resin was washed once with dry MeCN (500  $\mu\text{L}$ ). The DNA was eluted and precipitated as previously described and finally analyzed by LCMS.

A260

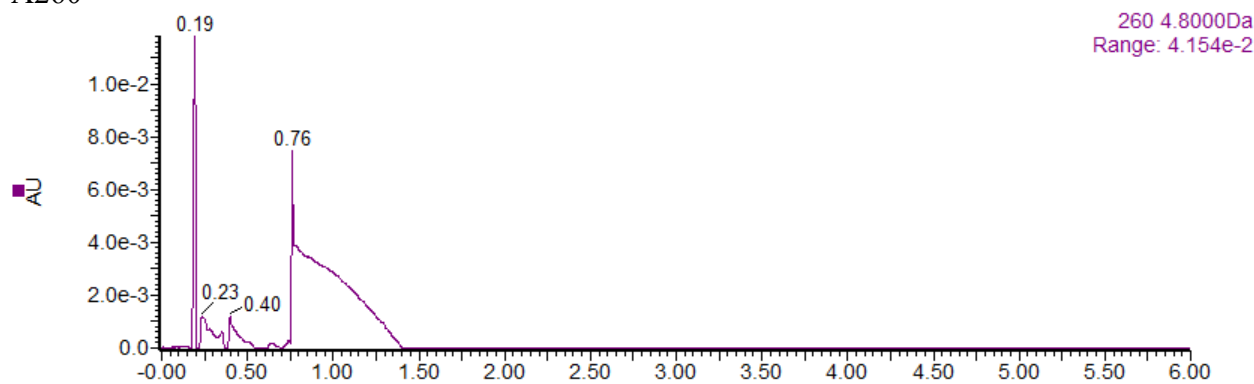

TIC

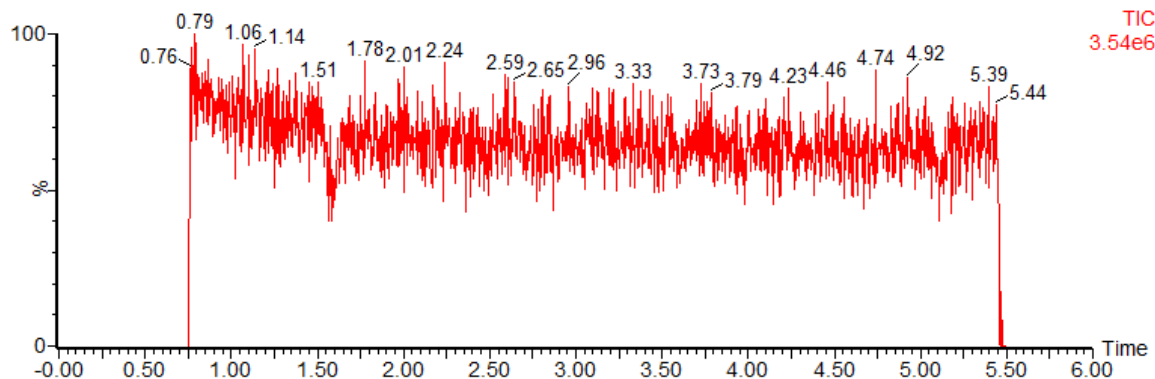

# Labeling of DNA Without Phosphate Blocking Groups

## General Protocol and Optimization

SENDER on non-phosphate DNA (**SI-16**) was optimized by performing reactions in a microcentrifuge tube as described in *General Procedure 2* with various reaction conditions (as described in the main text and Figure 2B). Briefly, 5 nmol of DNA (**SI-16**) was loaded onto 100  $\mu\text{L}$  of equilibrated resin. This loaded resin was washed with DMA (500  $\mu\text{L}$  twice) and dry THF (500  $\mu\text{L}$  three times) and dried under vacuum. In the case in which stringent drying was not performed (Figure 2B, Entry 8) the loaded resin was simply washed with acetonitrile (500  $\mu\text{L}$  three times).

$\Psi$ -1 in MeCN (varying concentration, 250  $\mu\text{L}$ ) was added to the loaded and dried resin. Then DBU (various concentration) was added to the reaction mixture. The reaction tube was vortexed for 30 seconds and incubated at room temperature for various amounts of time. The reactions were worked up by aspirating and discarding the reaction solution, and washing the resin bed with MeCN (500  $\mu\text{L}$ ) and 1:1 MeCN:PBS (500  $\mu\text{L}$ ). Elute buffer (300  $\mu\text{L}$ ) was added to the resin bed and the tube was agitated by orbital shaker for 5-10 minutes. The DNA containing elution buffer was collected by carefully pipetting the supernatant. DNA was isolate *via* ethanol precipitation. Ethanol precipitation was performed by adding 10% v/v of a NaCl solution (30  $\mu\text{L}$ , 5M) to the elute buffer and three volumes of cold ethanol (-20  $^{\circ}\text{C}$ ) were added to the tube (~1000 $\mu\text{L}$ ) and incubated for 18 hours at -20  $^{\circ}\text{C}$ . The tube was then centrifuged at 13,000 rpm for 15 minutes to pellet the DNA, and the supernatant ethanol was decanted off. The tubes were dried *via* speed vacuum, the DNA was dissolved and HPLC-MS analysis was performed.

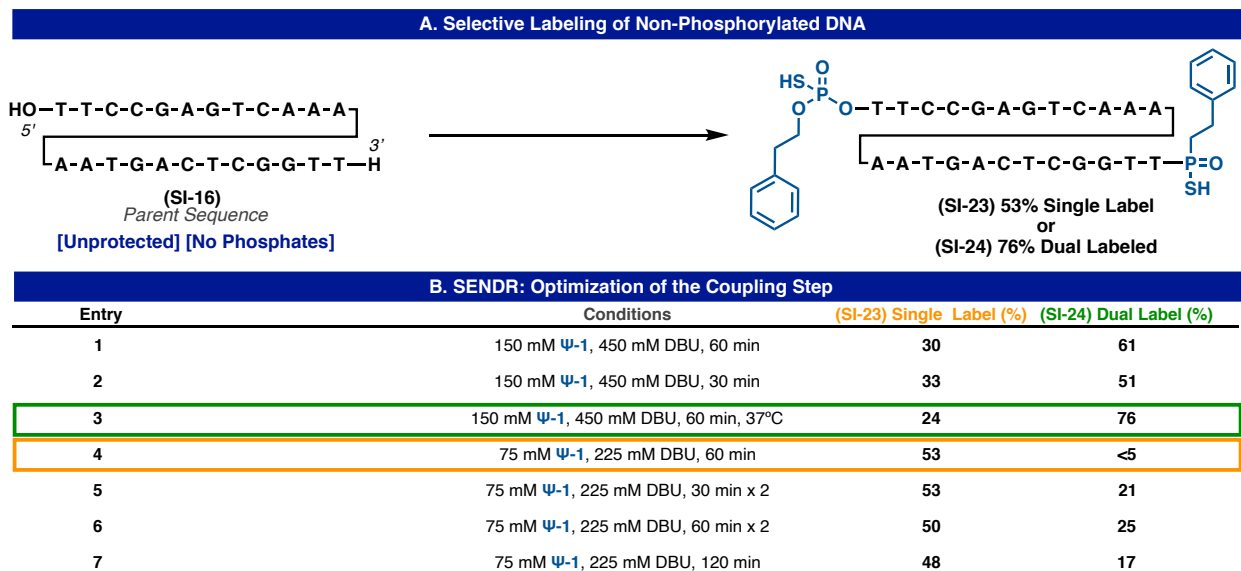

## Entry 1

LCMS Characterization of **Single Label SI-23**

Produced from **SI-16** by General Procedure **3**:

Conversion (A260): 30%

Retention Time: 2.29 min

Expected Mass: 7552.02

Expected (M-8)/8 Ion: 943.0

Found Deconvoluted Mass: 7552.00

Found (M-6)/6 Ion: 942.78

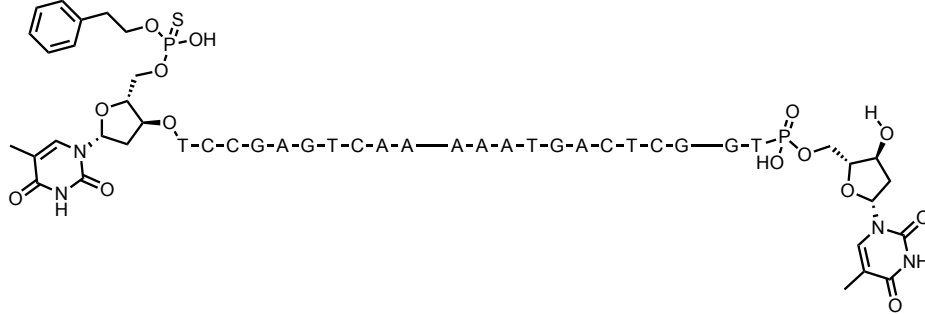

## A260

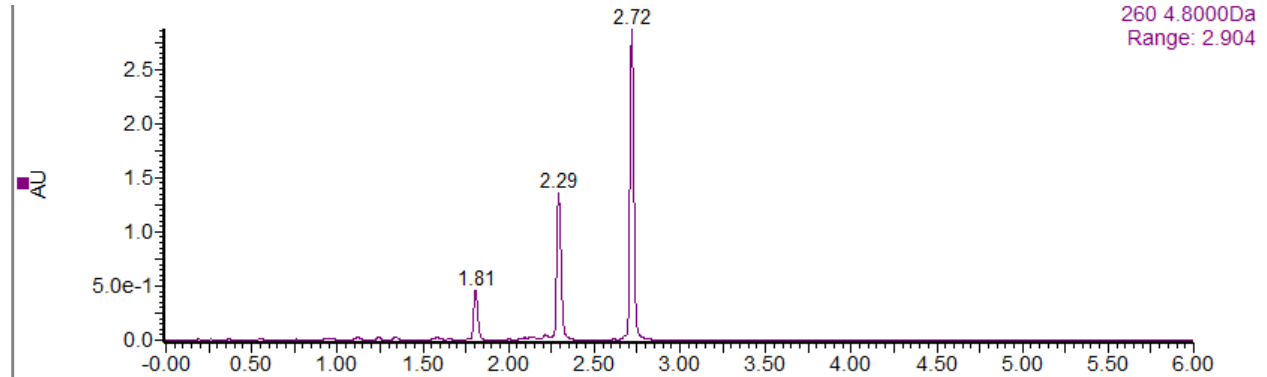

## TIC

Oligo03512

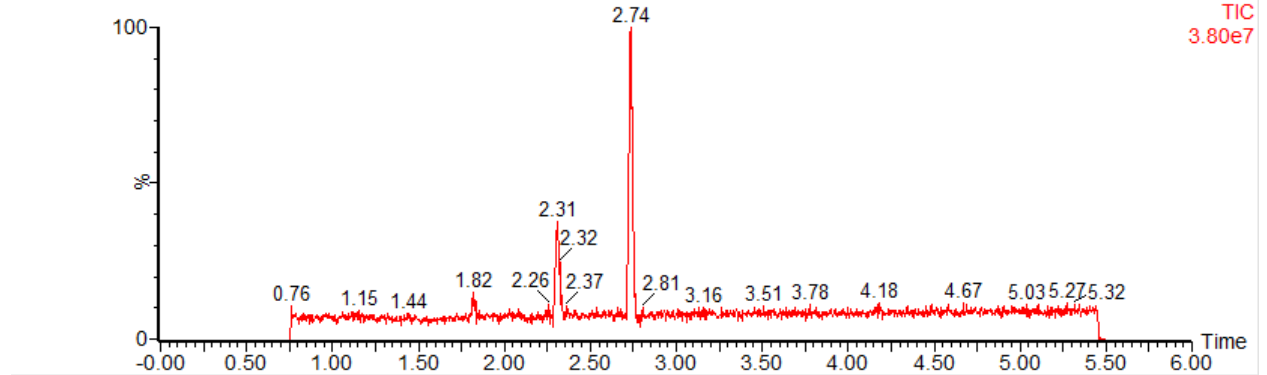

Raw Mass Spectrum Retention Time (2.3 minutes)

6.93e4

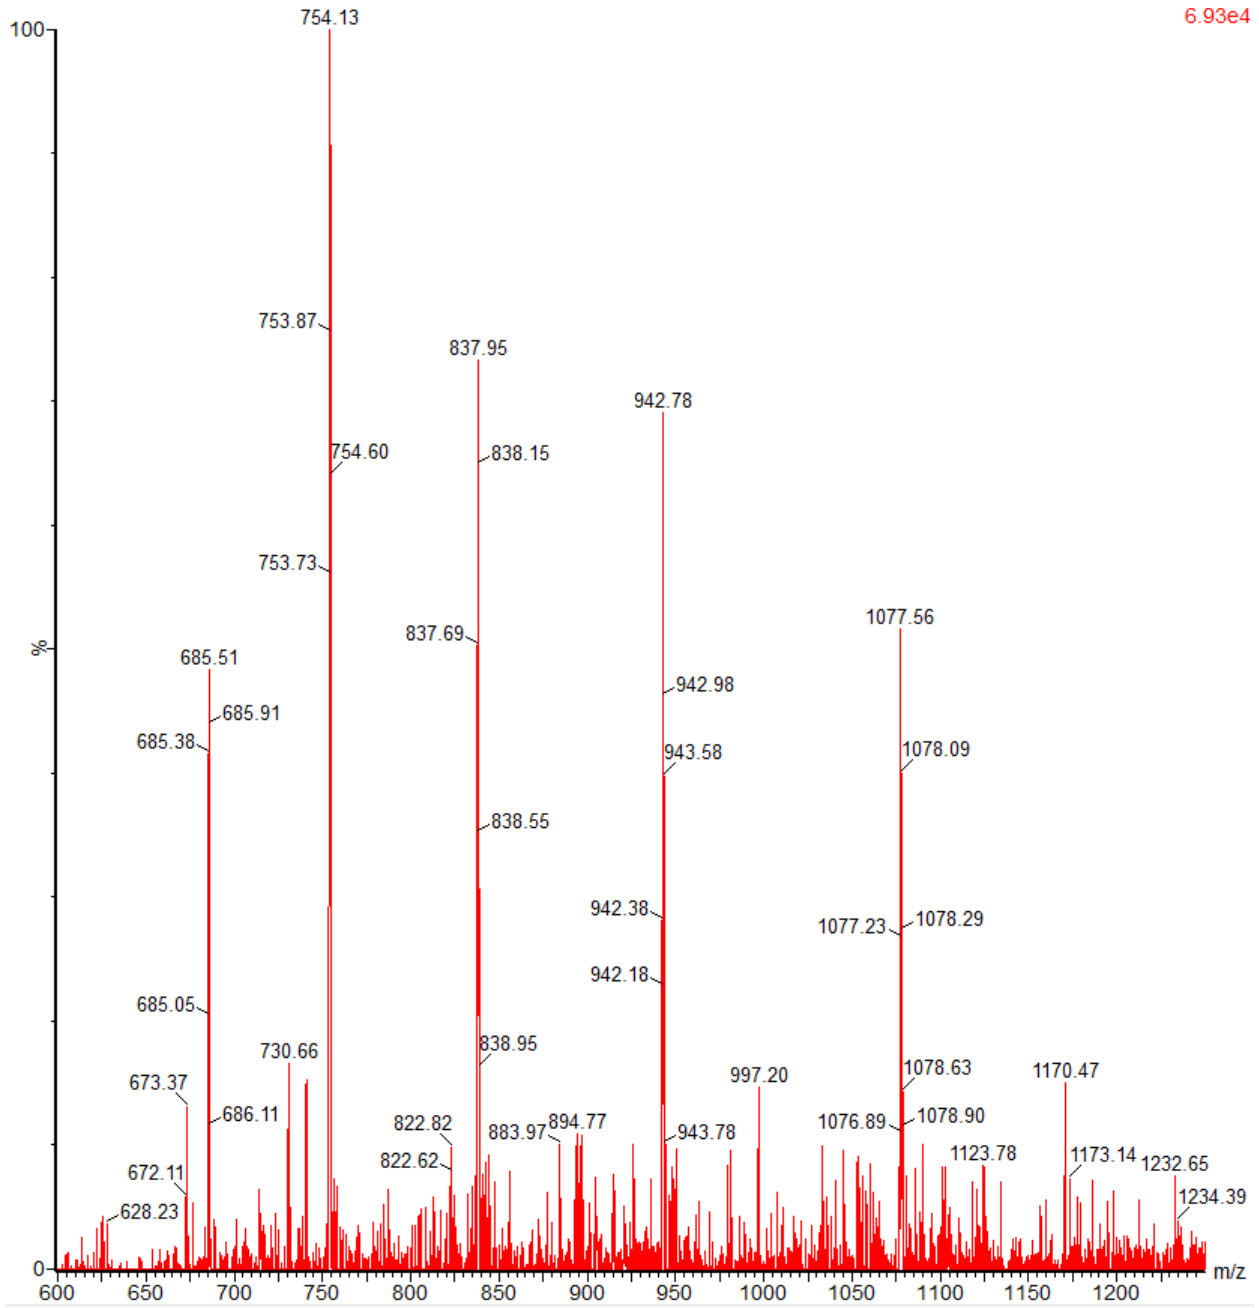

Deconvoluted Mass Spectrum Retention Time (2.3 minutes)

2.59e6

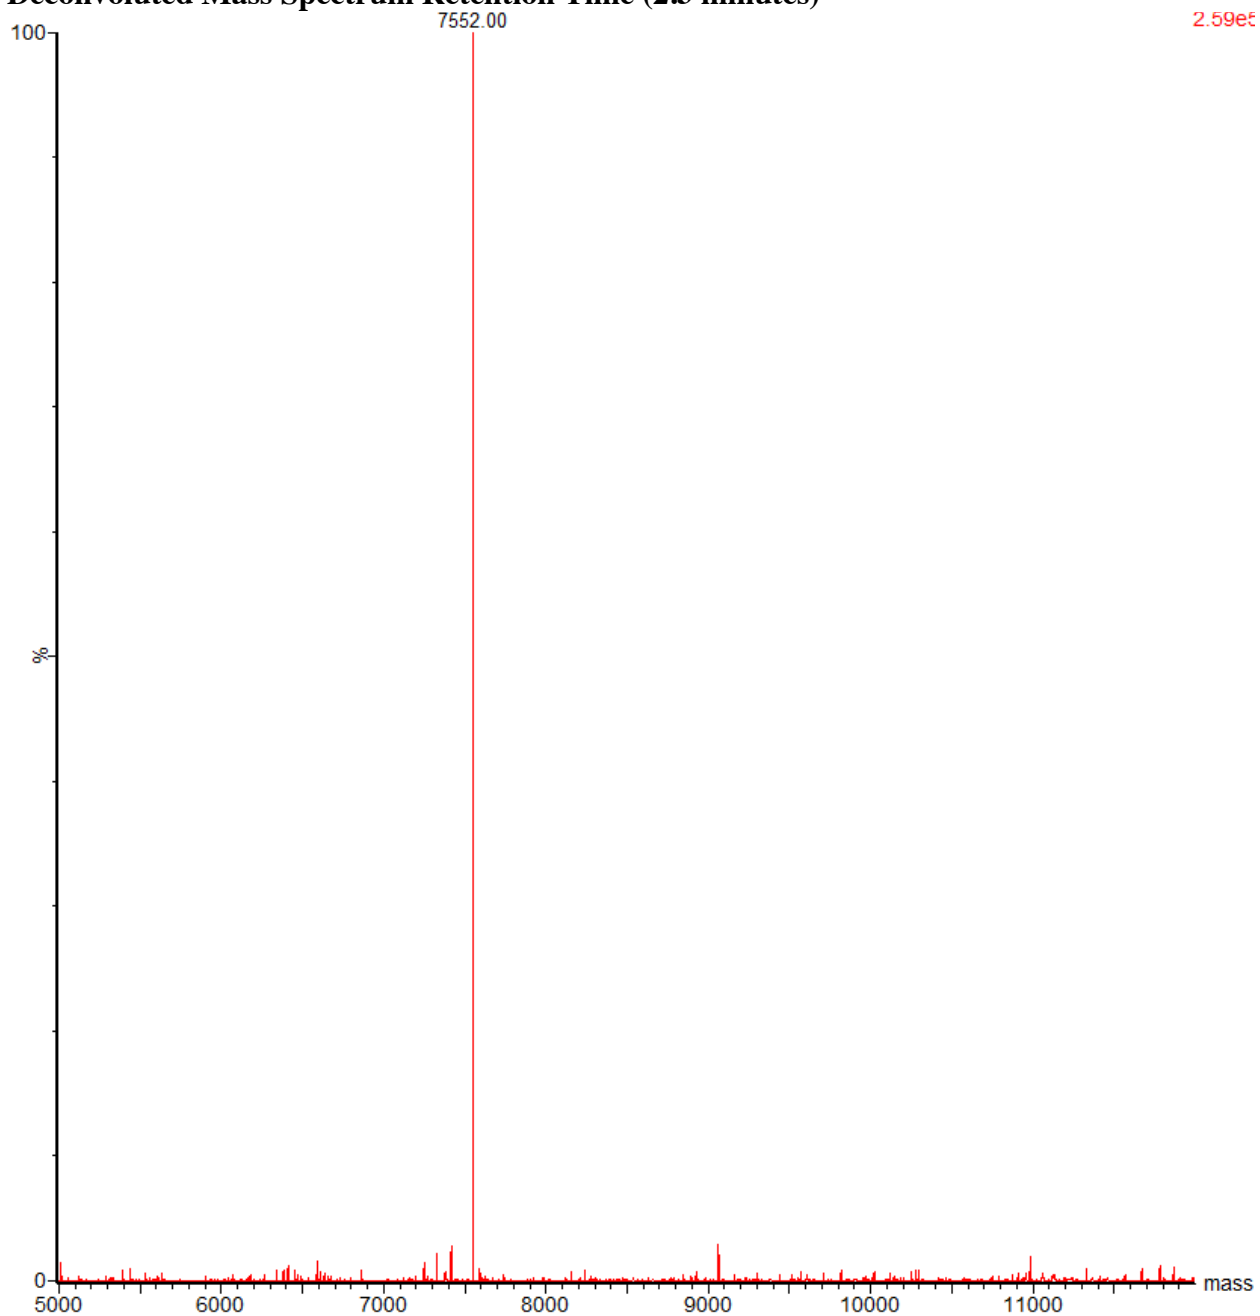

---

LCMS Characterization of **Double Label SI-24**

Produced from **SI-16** by General Procedure **3**:

Conversion (A260): 61%

Retention Time: 2.72 min

Expected Mass: 7752.2

Expected (M-8)/8 Ion: 968.02

Found Deconvoluted Mass: 7552.00

Found (M-6)/6 Ion: 968.06

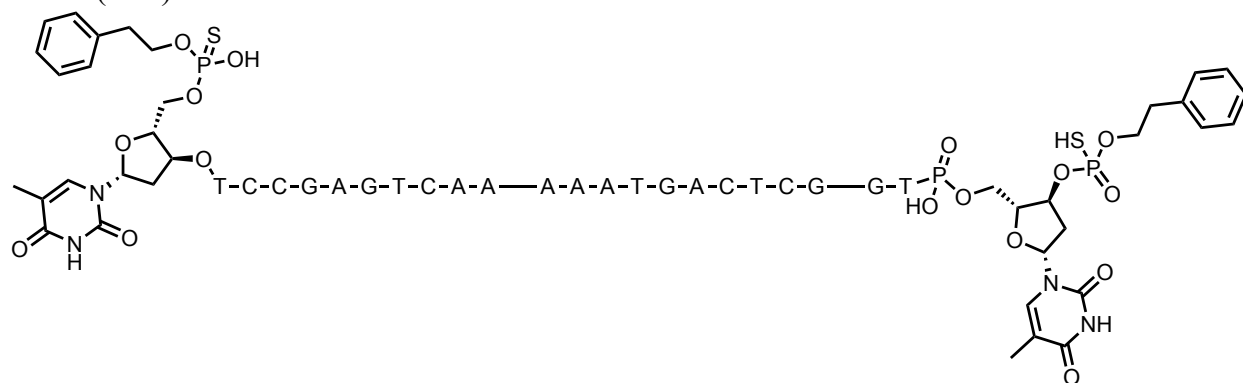

Molecular Weight: 7752.21



# Raw Mass Spectrum (Retention Time 2.7 minutes)

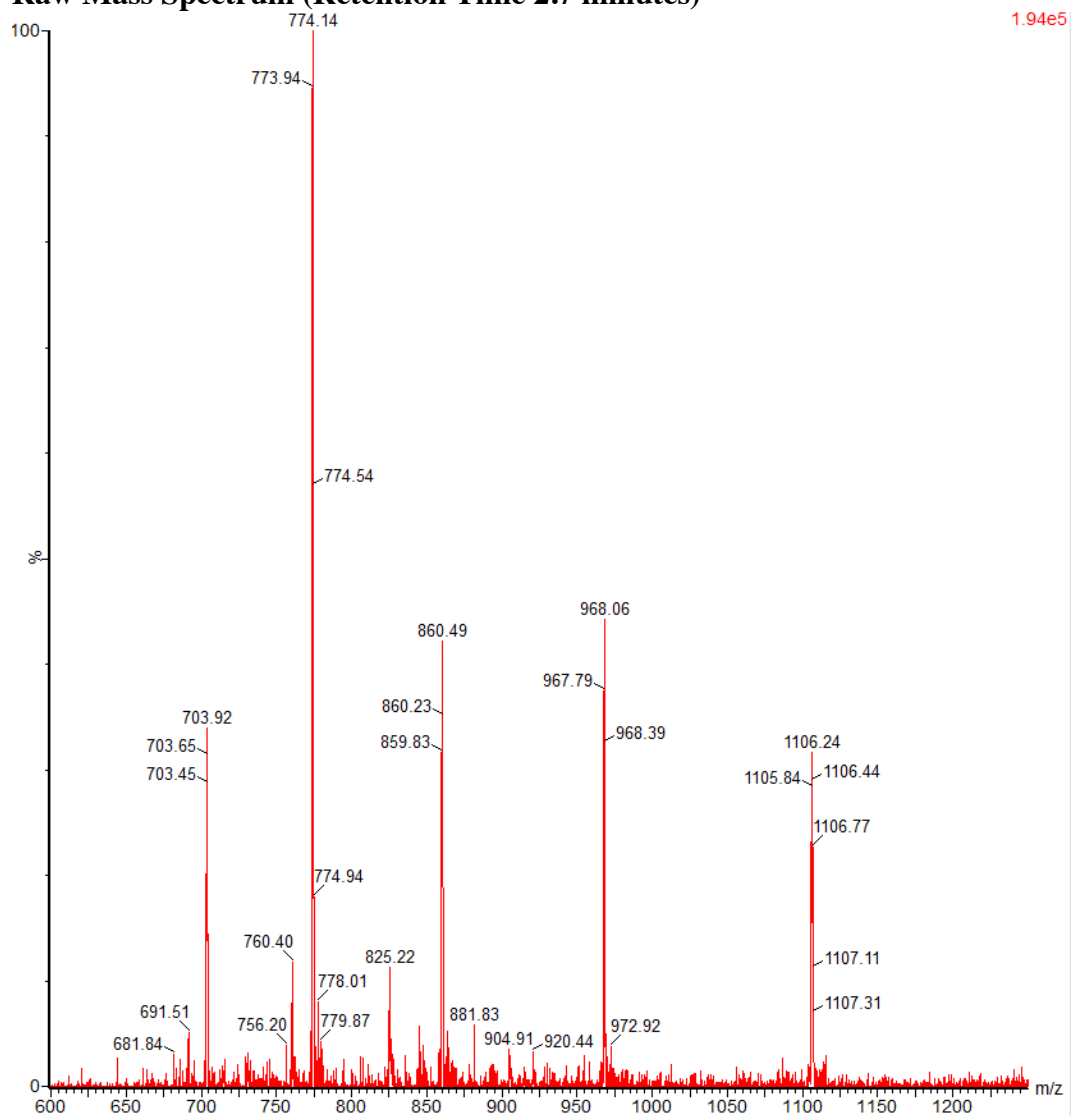

Deconvoluted Mass Spectrum (Retention Time 2.7 minutes)

5.05e5

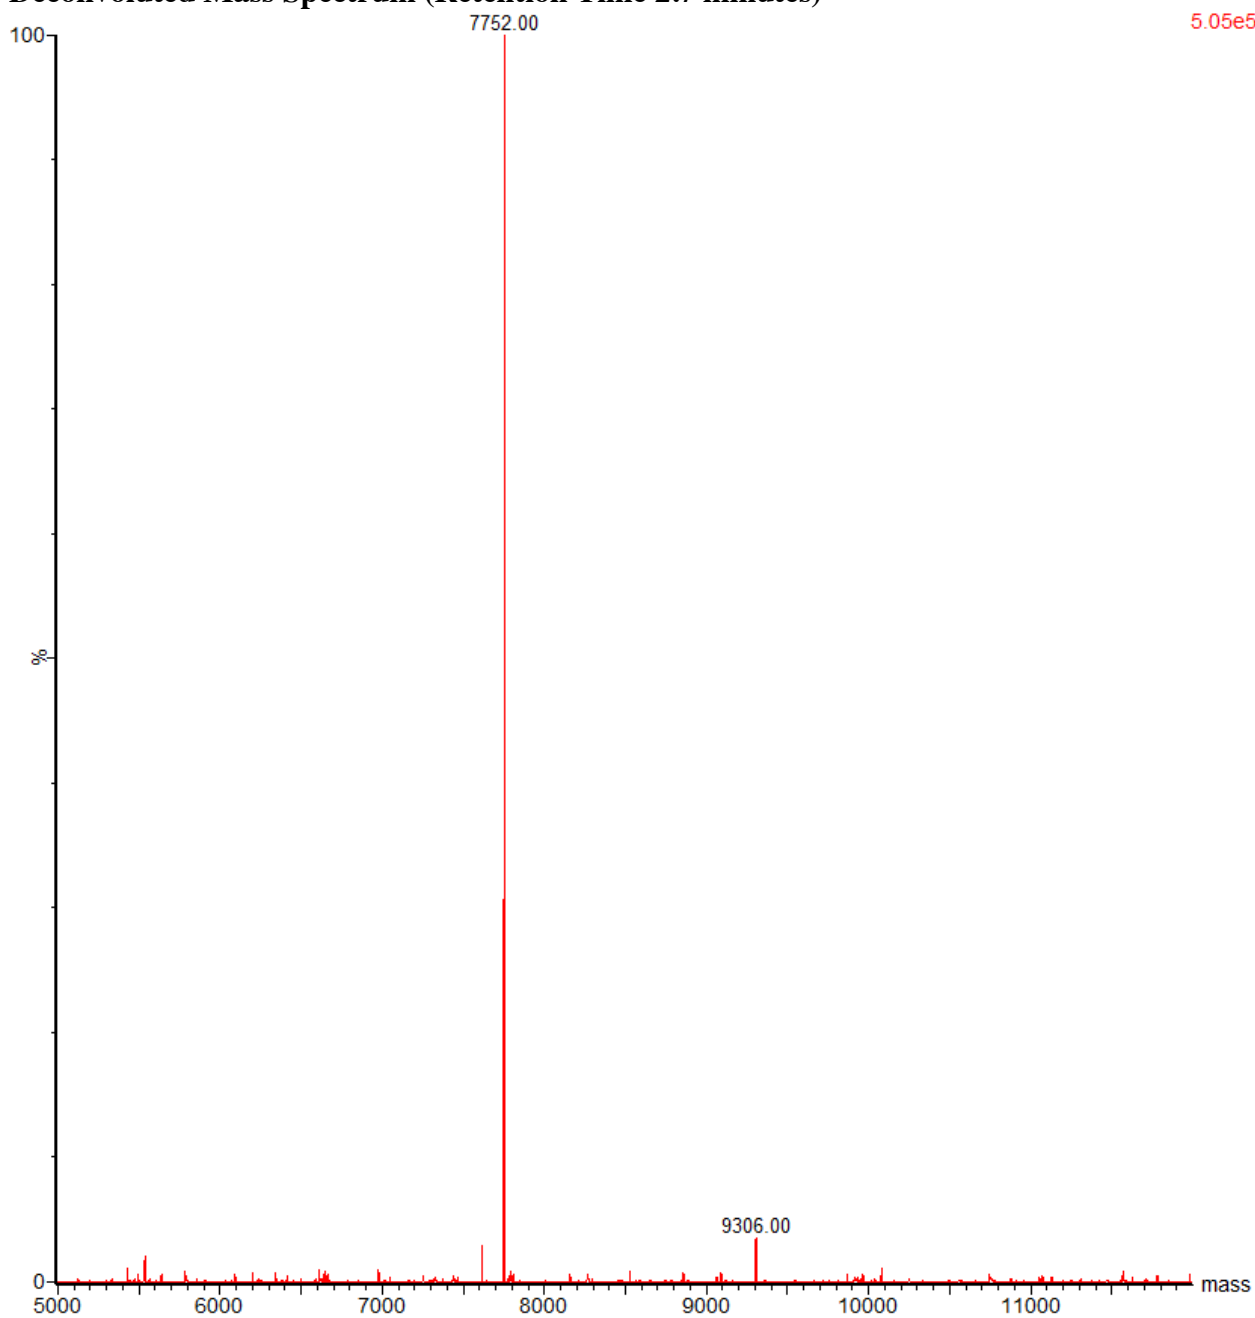

## Entry 2

LCMS Characterization of **Single Label SI-23**

Produced from **SI-16** by General Procedure **3**:

Conversion (A260): 33%

Retention Time: 2.29 min

Expected Mass: 7552.02

Expected (M-8)/8 Ion: 943.0

Found Deconvoluted Mass: 7551.00

Found (M-6)/6 Ion: 942.92



Molecular Weight: 7552.02

## A260

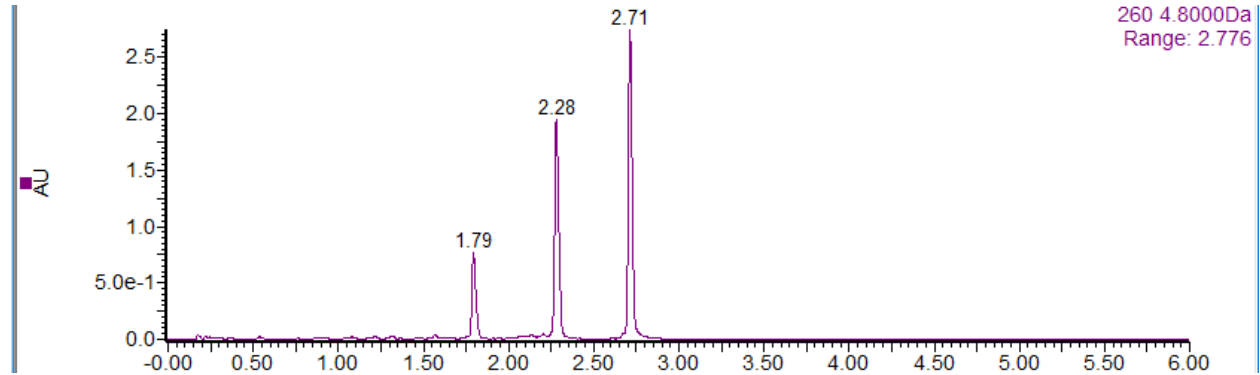

## TIC

Oligo03513

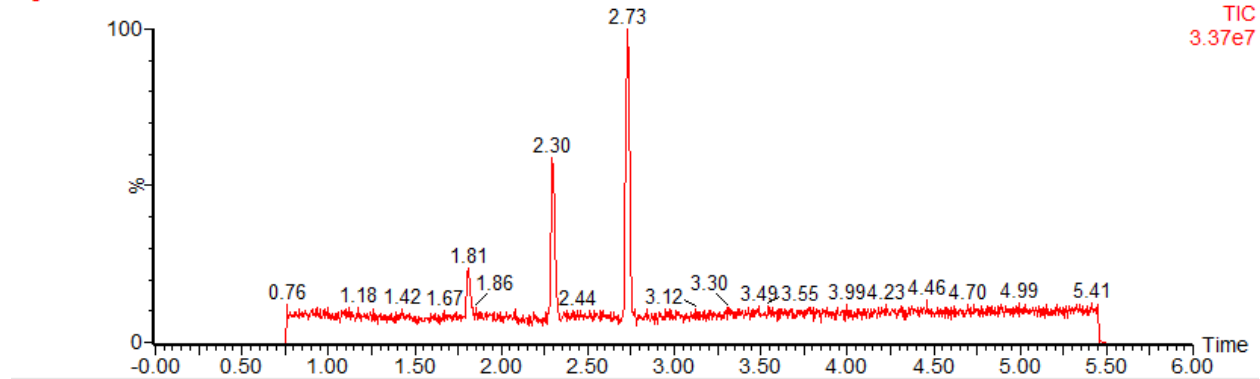

Raw Mass Spectrum (Retention Time 2.3 minutes)

2.19e5

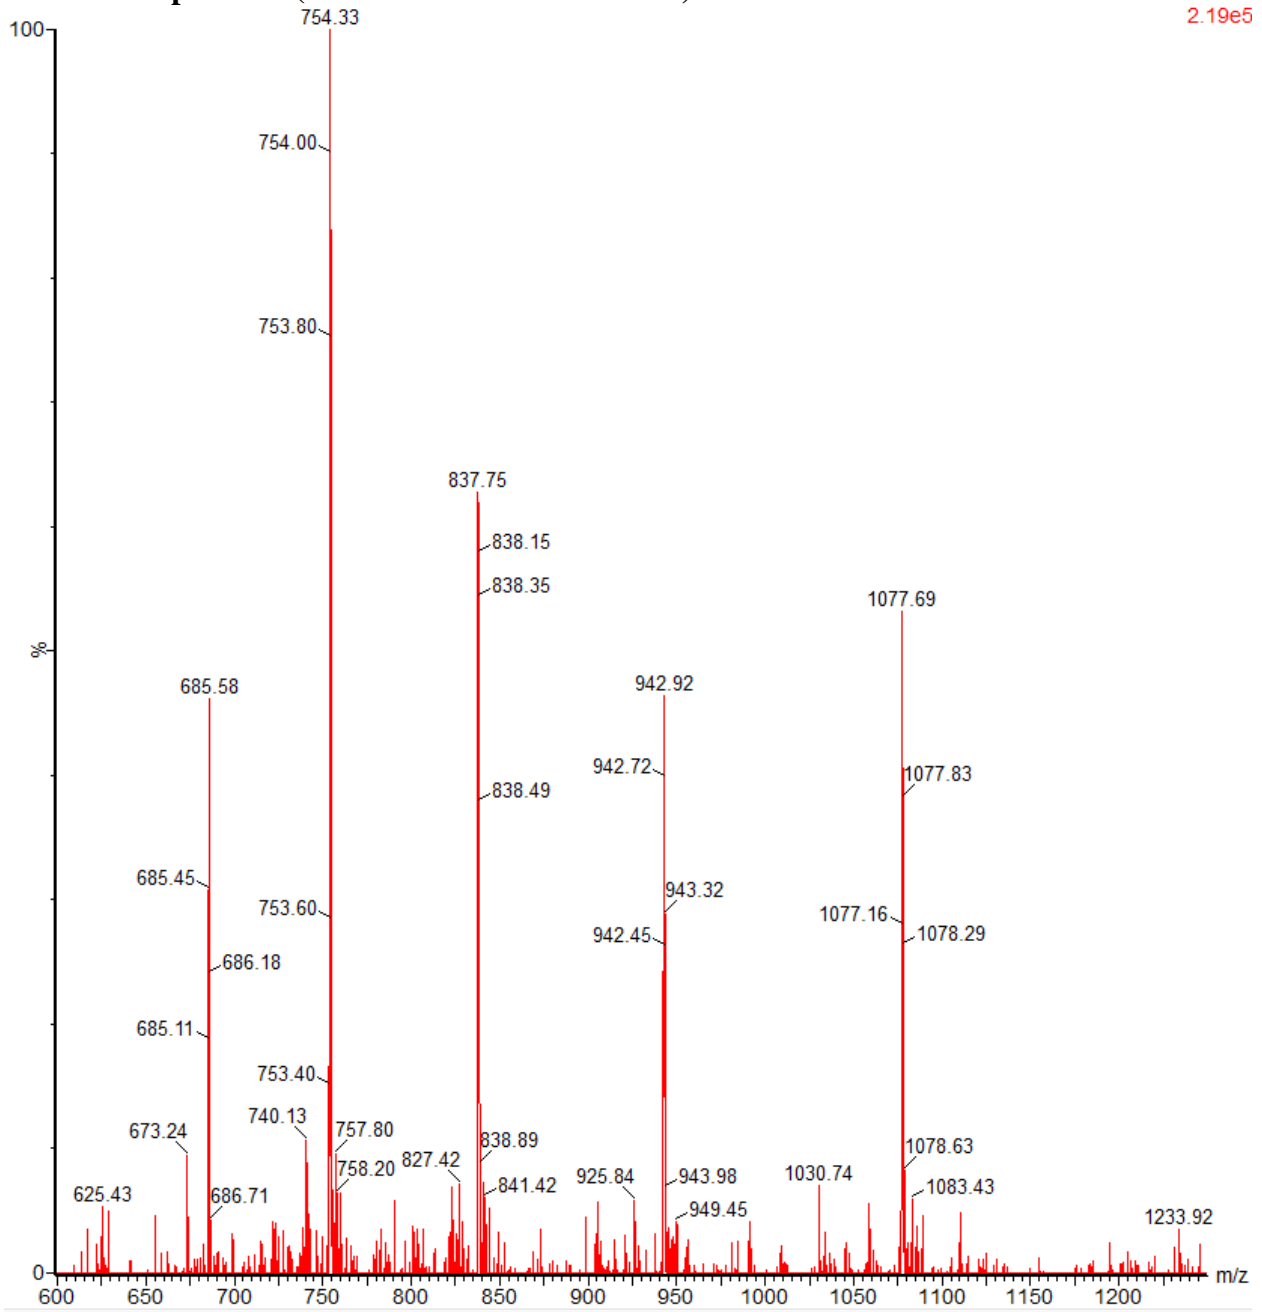

Deconvoluted Mass Spectrum (Retention Time 2.3 minutes)

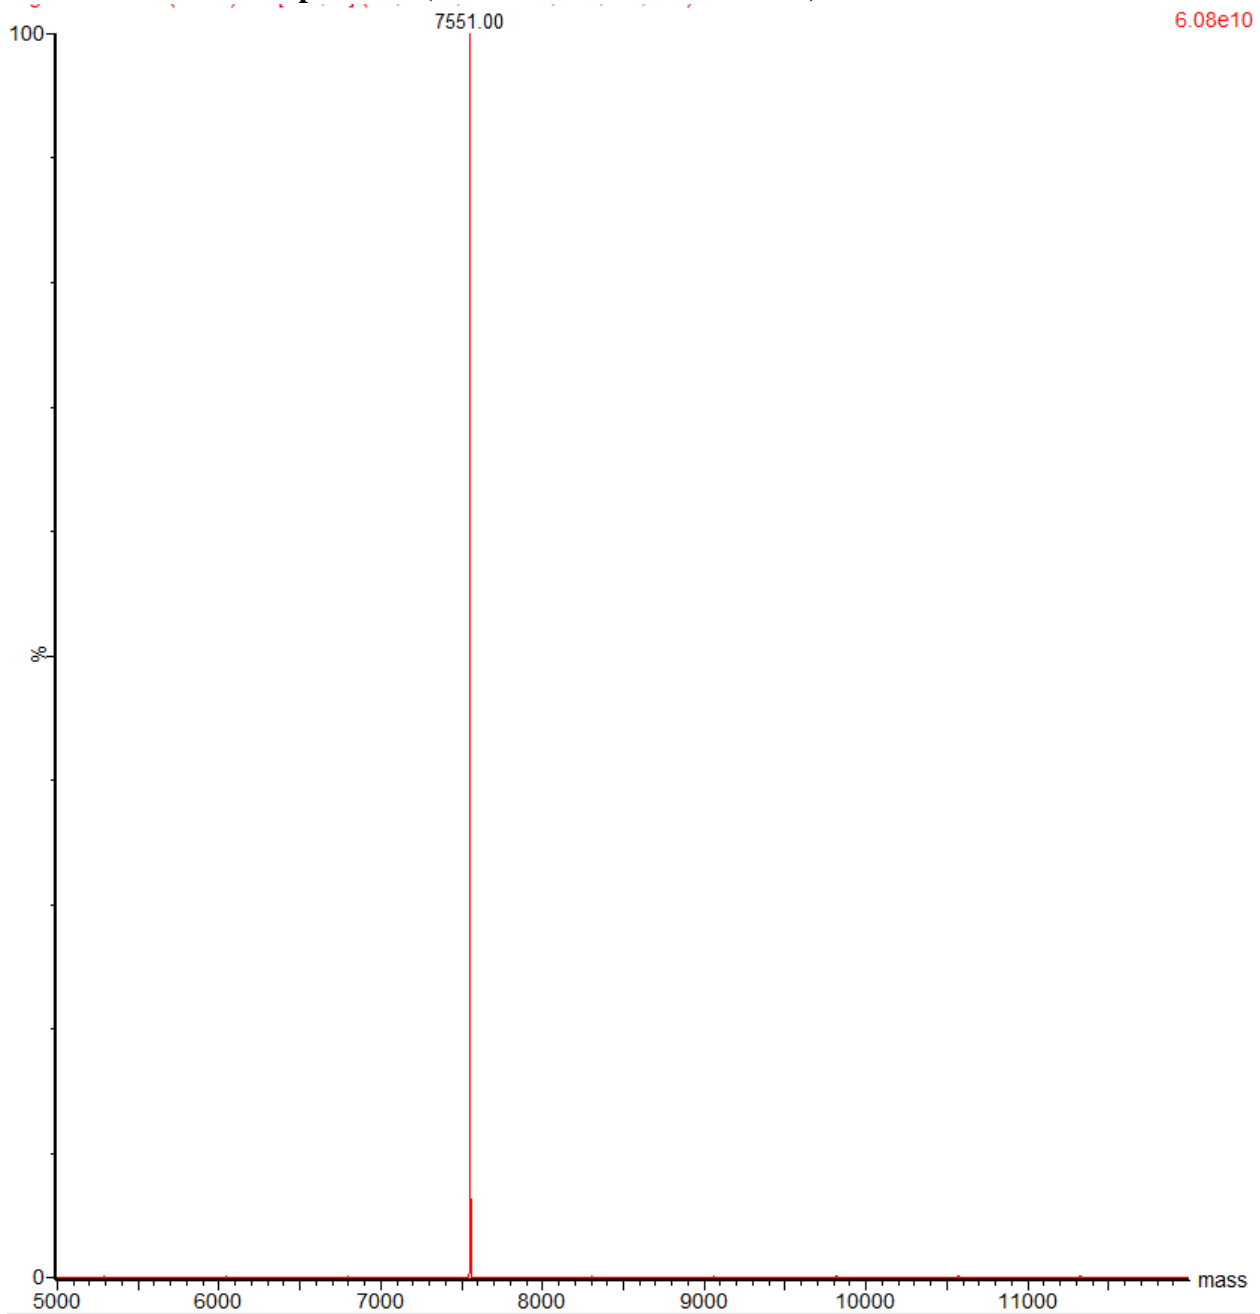

---

LCMS Characterization of **Double Lable SI-24**

Produced from **SI-16** by General Procedure **3**:

Conversion (A260): 51%

Retention Time: 2.72 min

Expected Mass: 7752.2

Expected (M-8)/8 Ion: 968.02

Found Deconvoluted Mass: 7553.00

Found (M-6)/6 Ion: 967.72



Molecular Weight: 7752.21

Raw Mass Spectrum (Retention Time 2.7 Minutes)

3.25e5

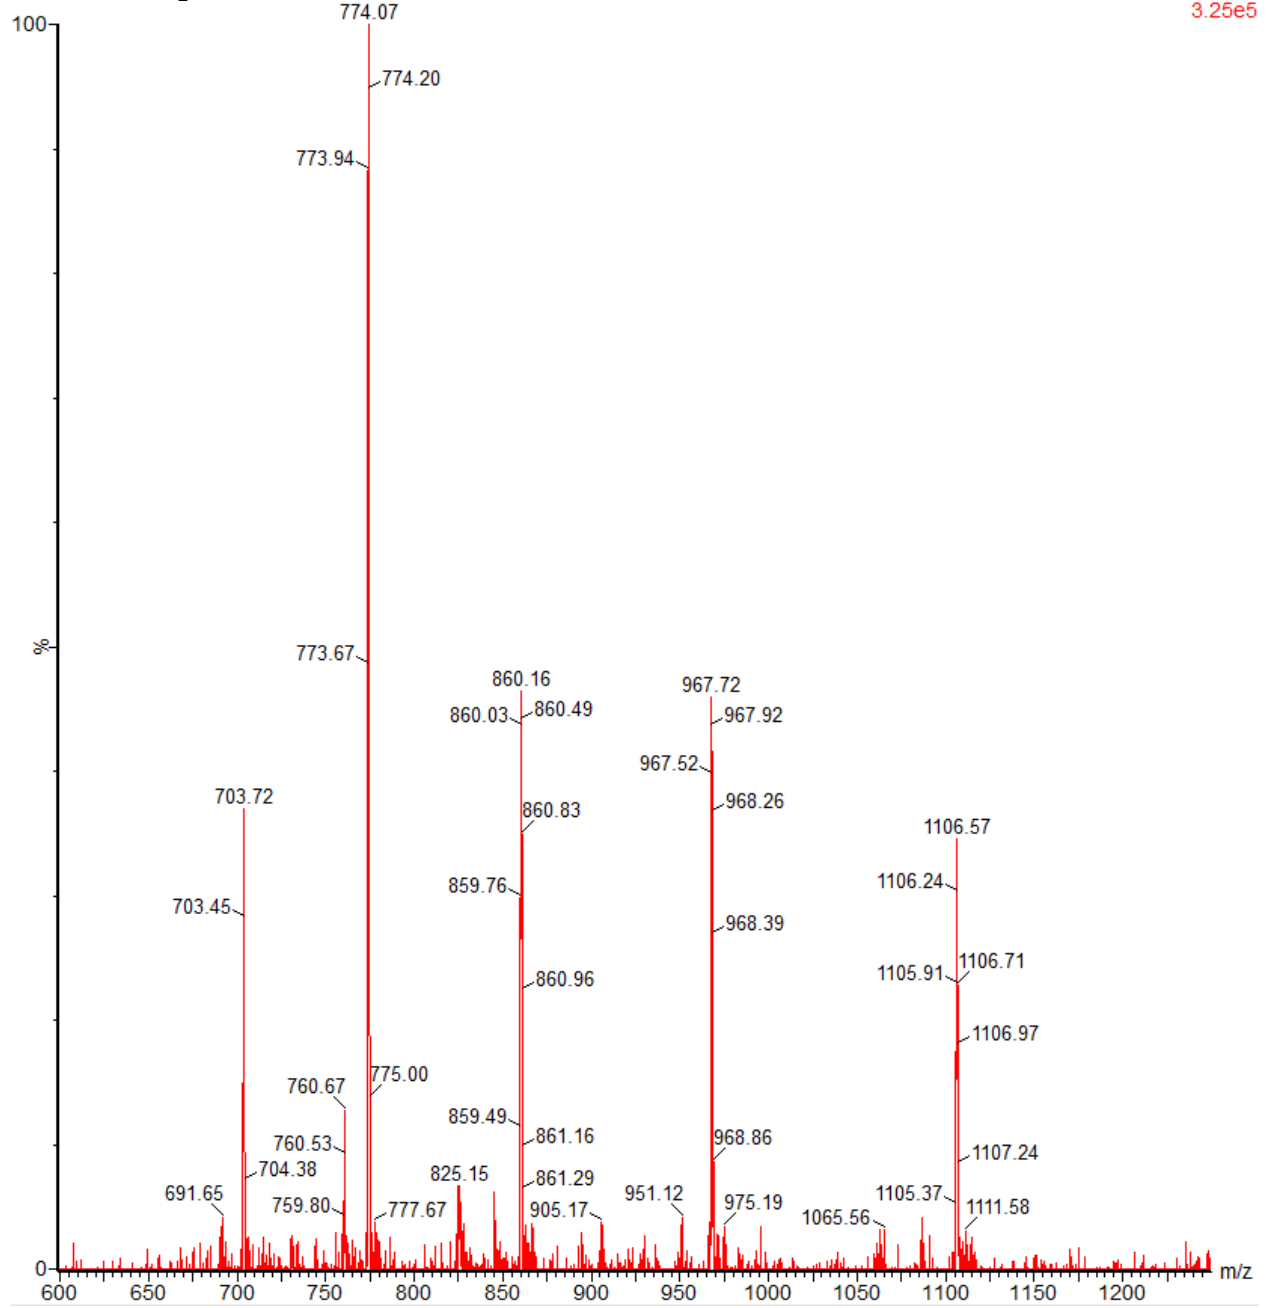

Deconvoluted Mass Spectrum (Retention Time 2.7 Minutes)

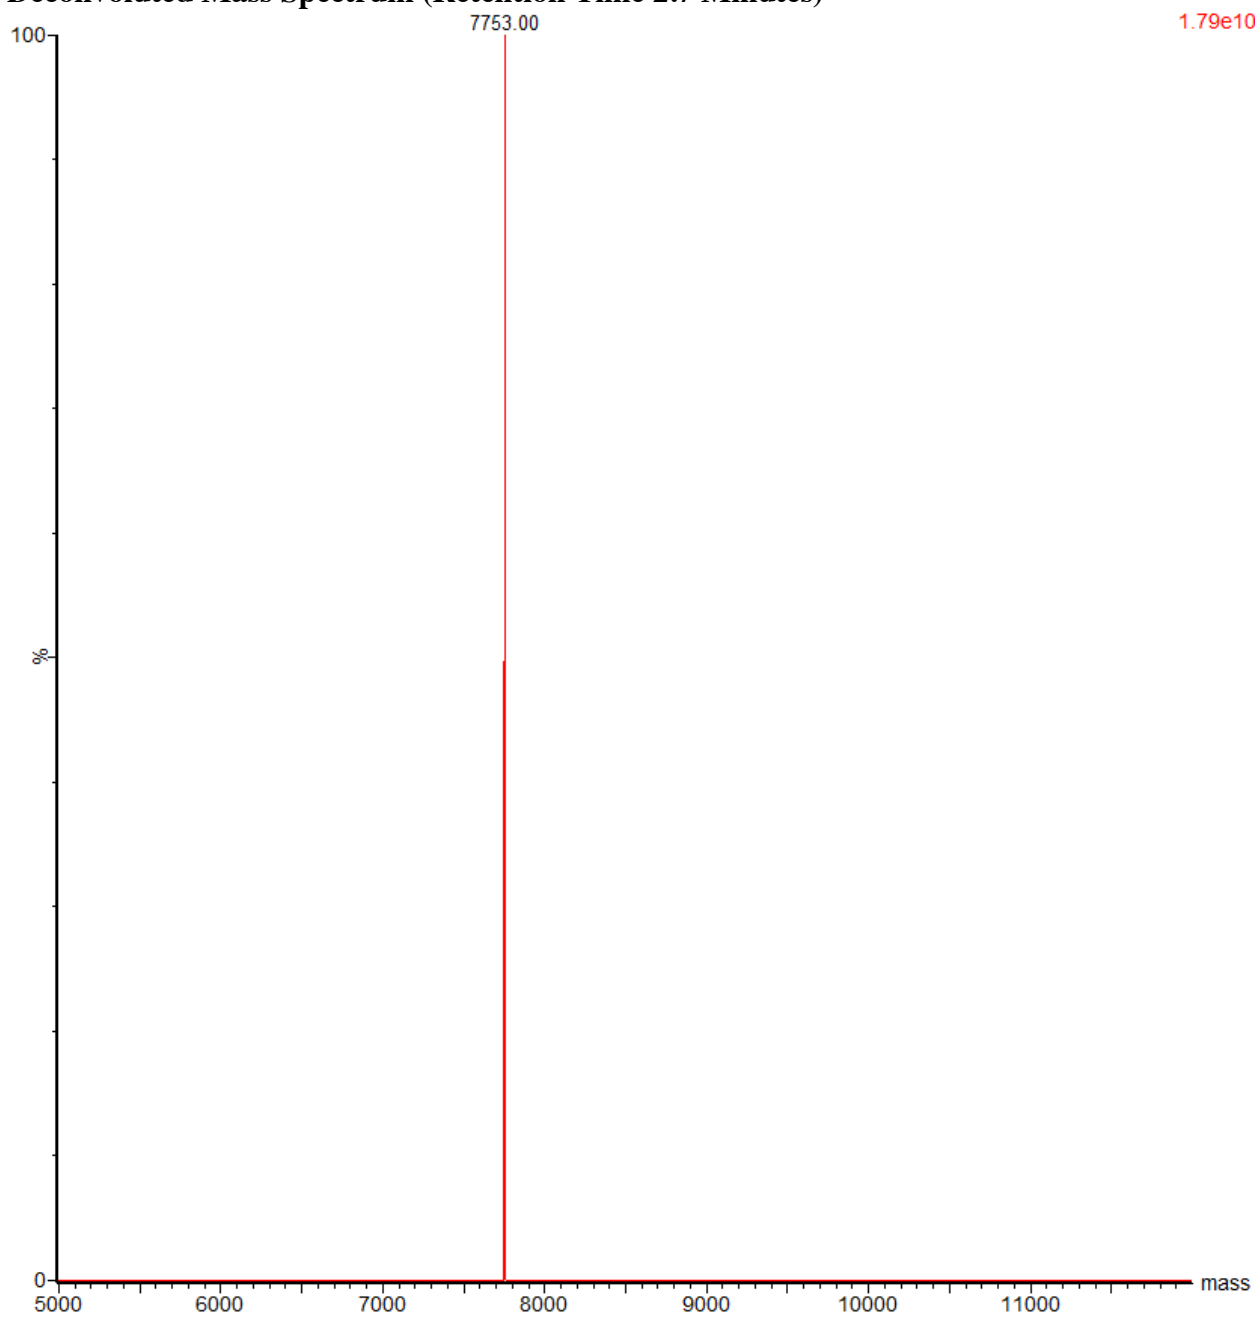

1.79e10



LCMS Characterization of **Double Label SI-24**

Produced from **SI-16** by General Procedure **3**:

Conversion (A260): 76%

Retention Time: 2.71 min

Expected Mass: 7752.2

Expected (M-8)/8 Ion: 968.02

Found Deconvoluted Mass: 7552.00

Found (M-6)/6 Ion: 967.9

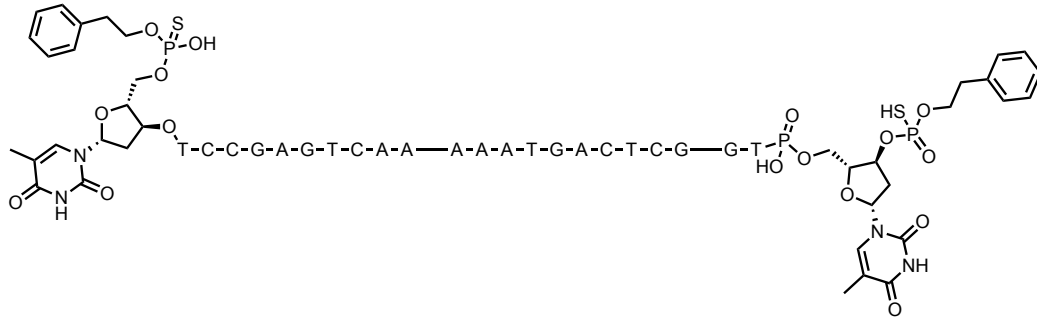

**A260**

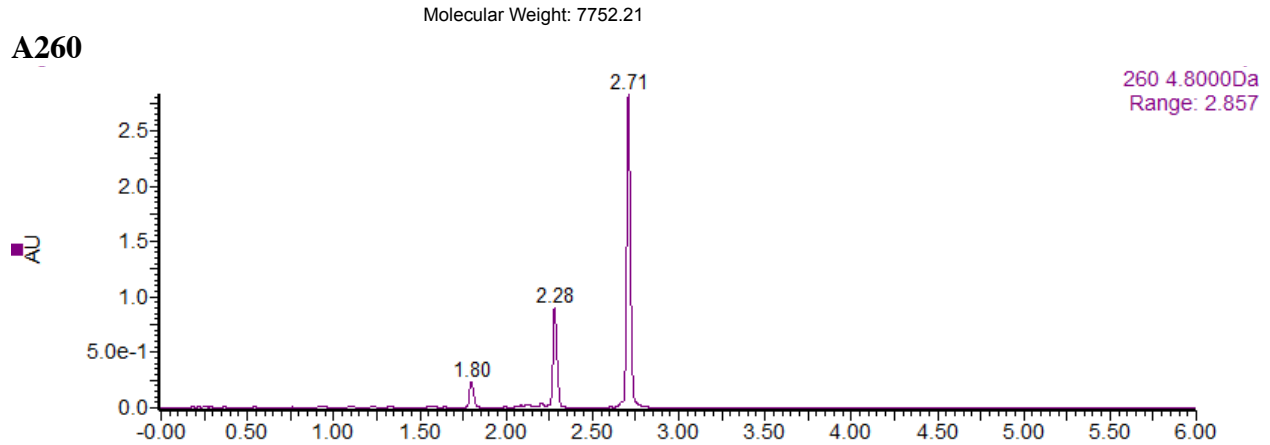

**TIC**

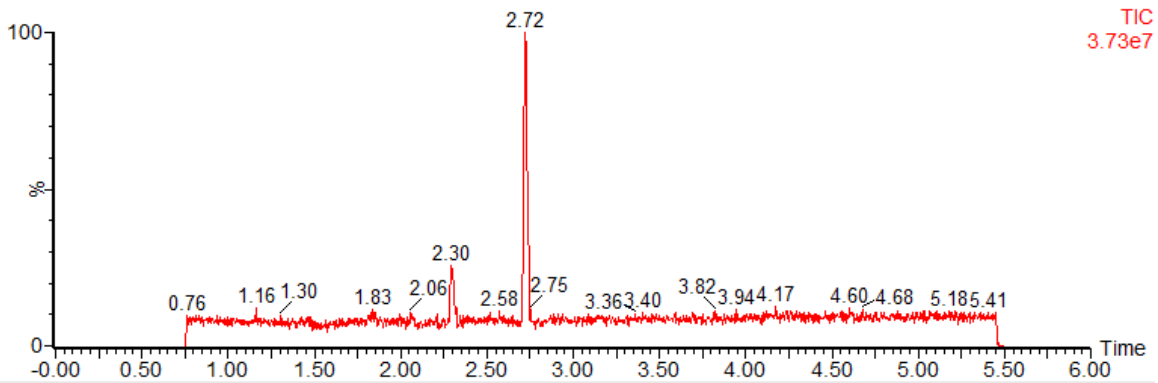

Raw Mass Spectrum (Retention Time 2.7 Minutes)

3.83e5

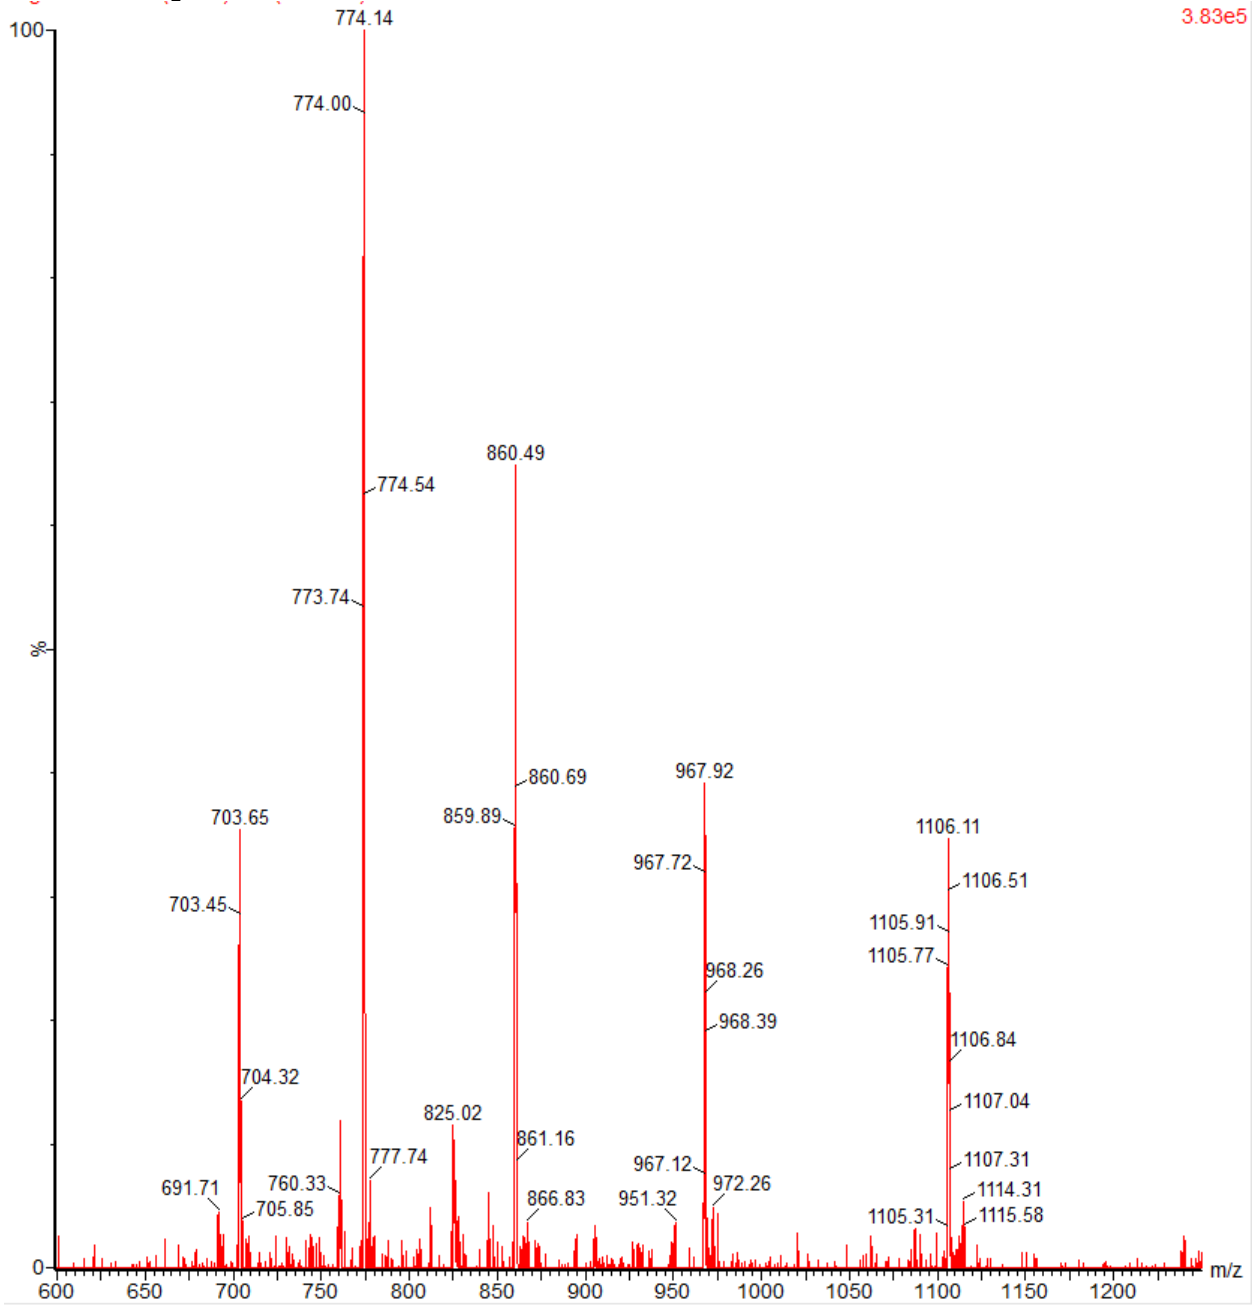

Deconvoluted Mass Spectrum (Retention Time 2.7 Minutes)

1.66e8

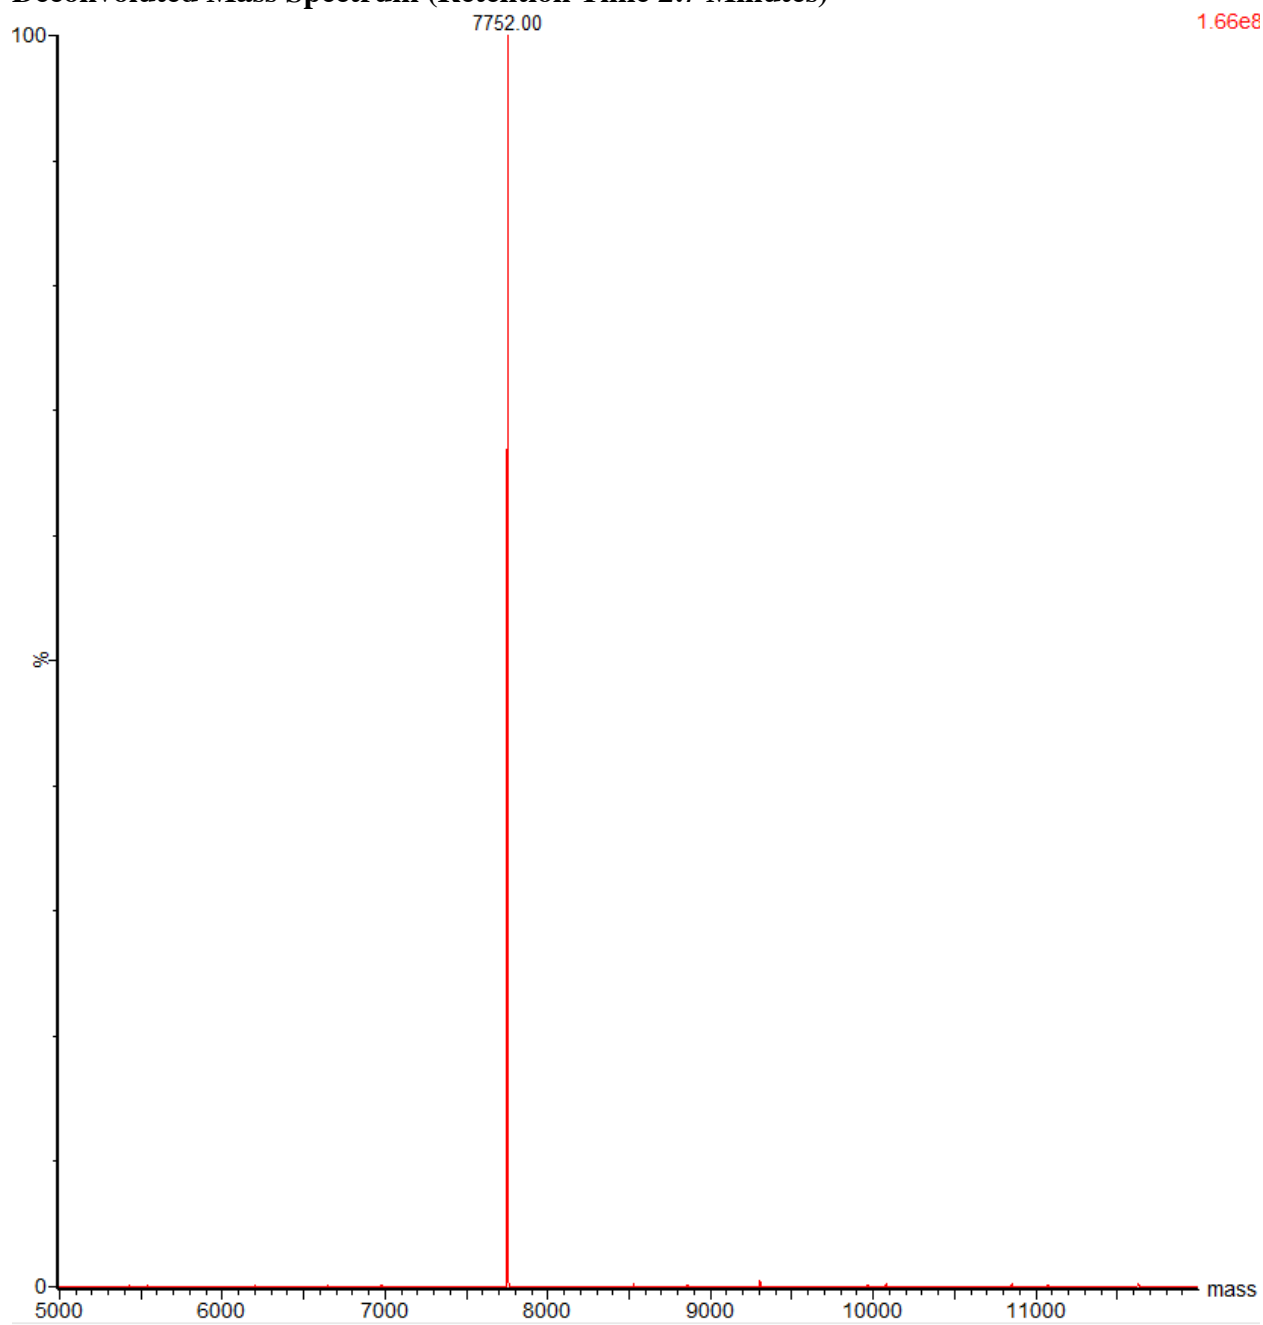



Raw Mass Spectrum (Retention Time 2.3 minutes)

9.23e4

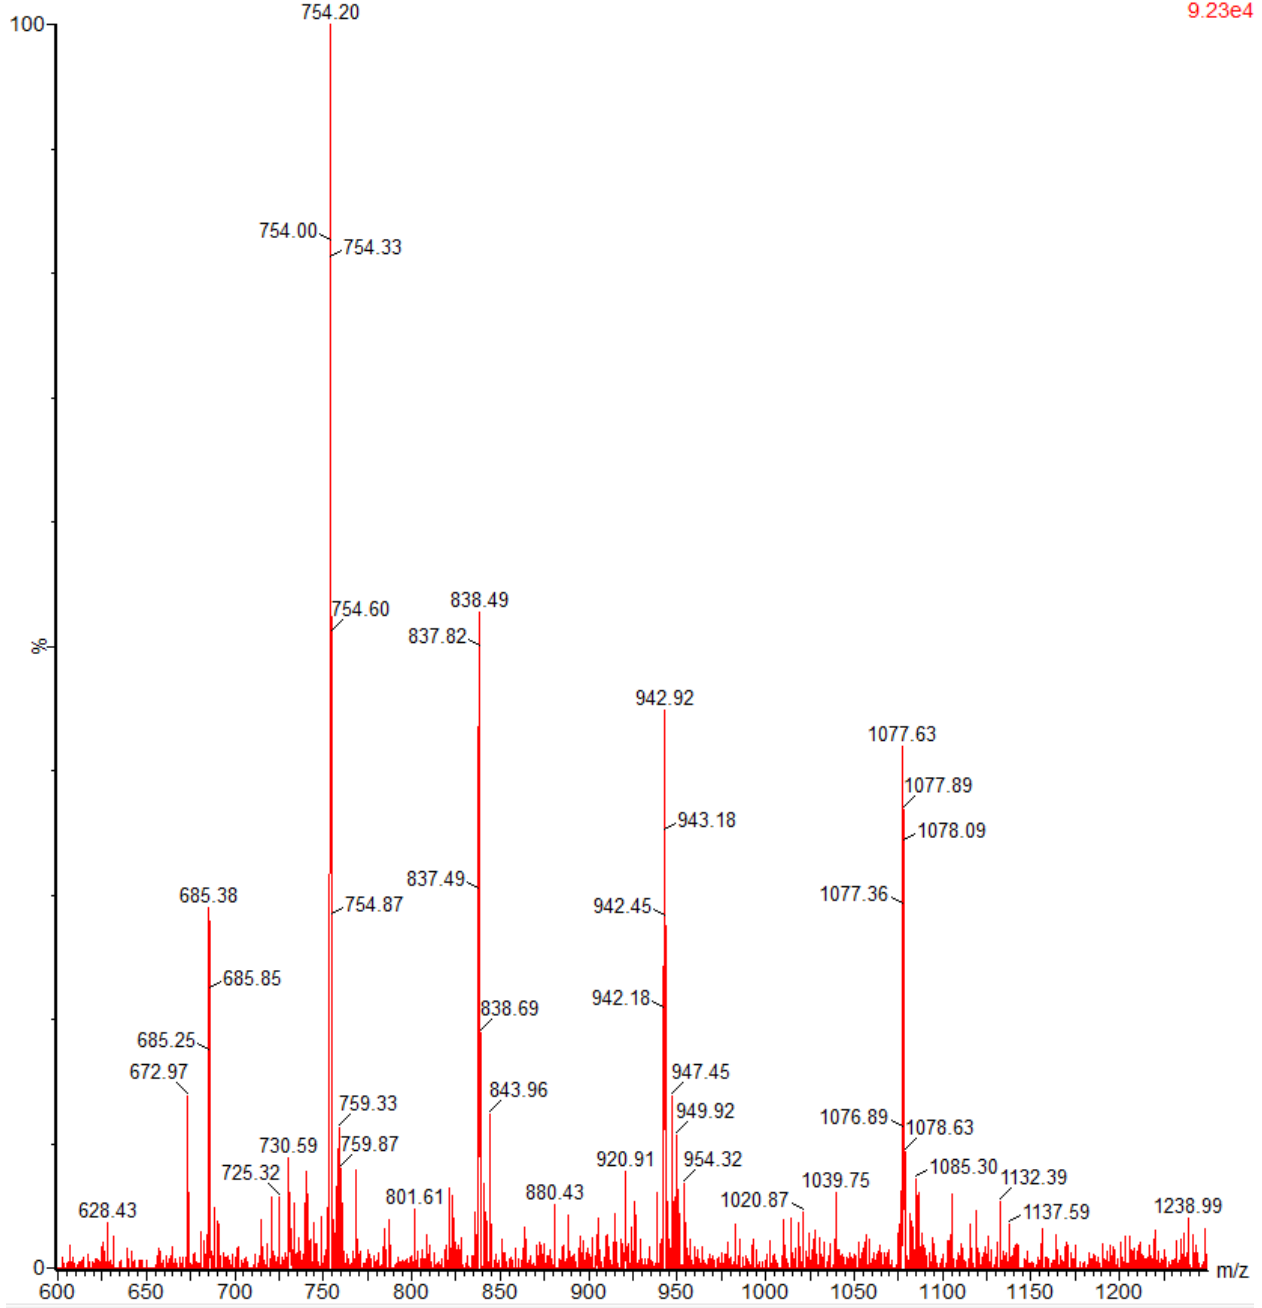

**Deconvoluted Mass Spectrum (Retention Time 2.3 minutes)**

2.92e5

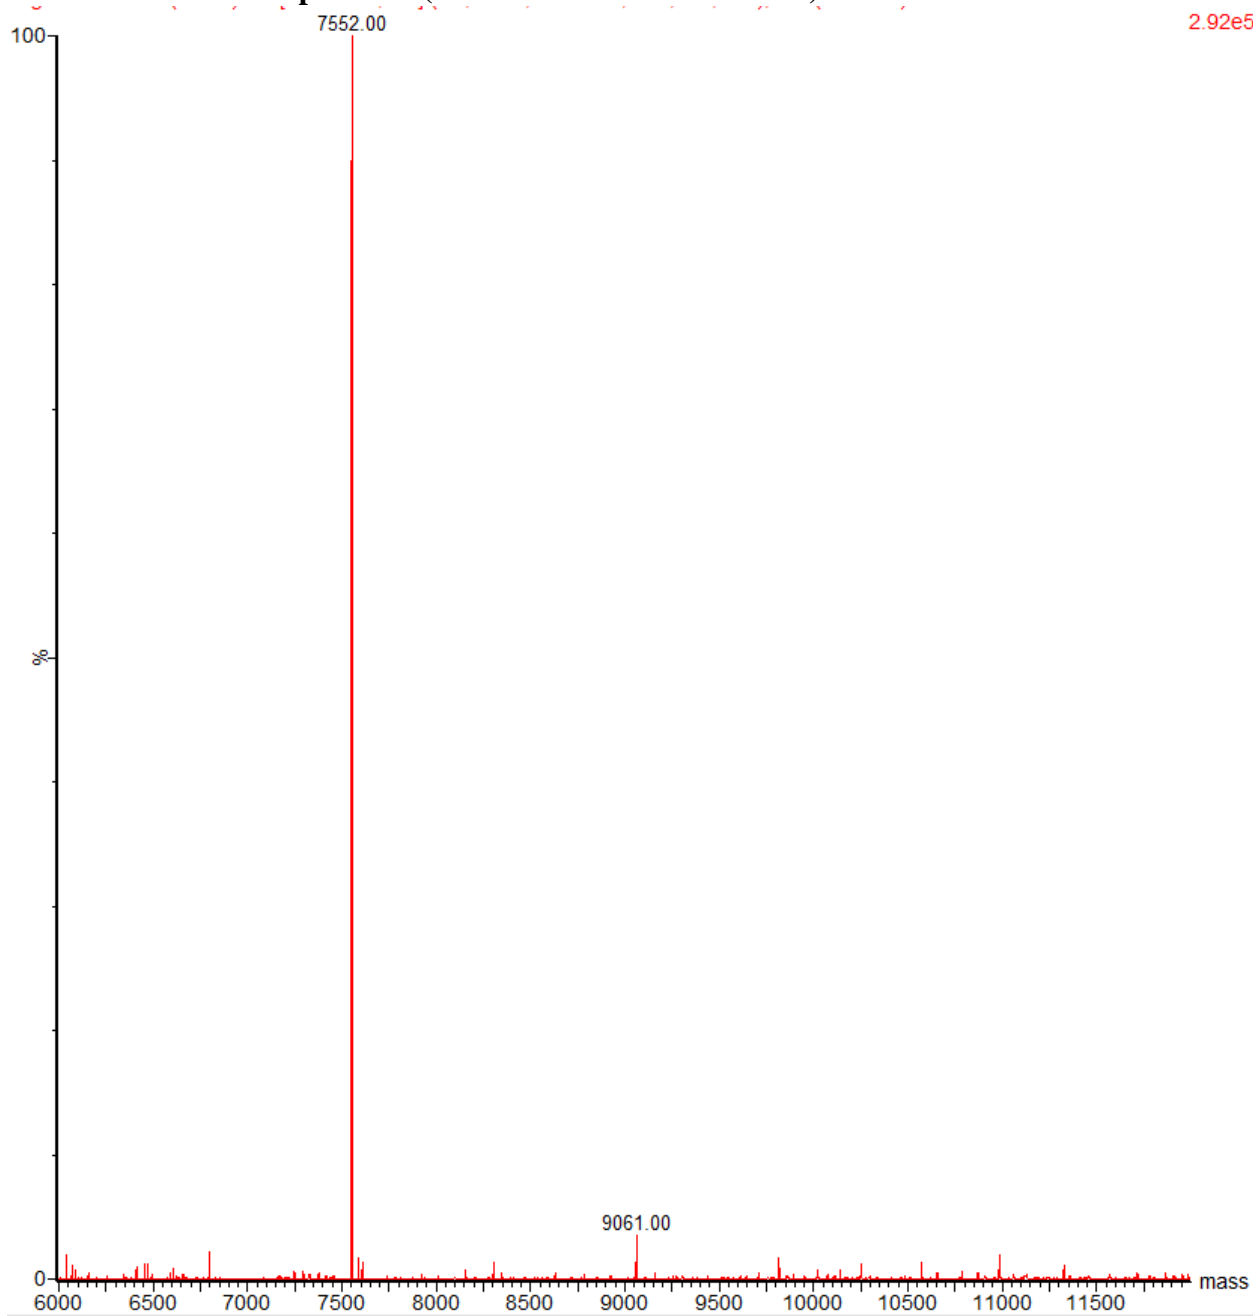

## Entry 5

LCMS Characterization of **Single Label SI-23**

Produced from **SI-16** by General Procedure **3**:

Conversion (A260): 53%

Retention Time: 2.29 min

Expected Mass: 7552.02

Expected (M-8)/8 Ion: 943.0

Found Deconvoluted Mass: 7552.00

Found (M-6)/6 Ion: 942.78

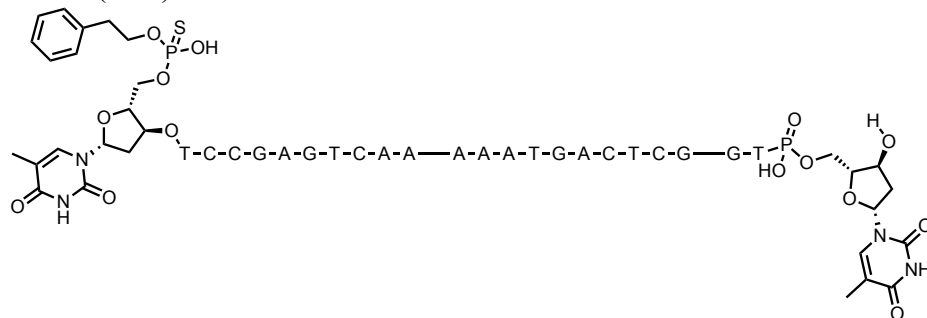

Molecular Weight: 7552.02

## A260

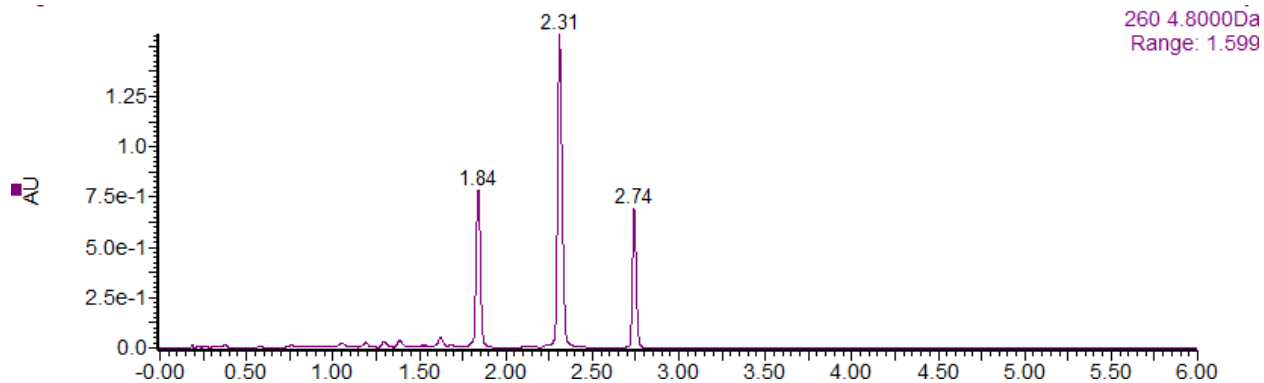

## TIC

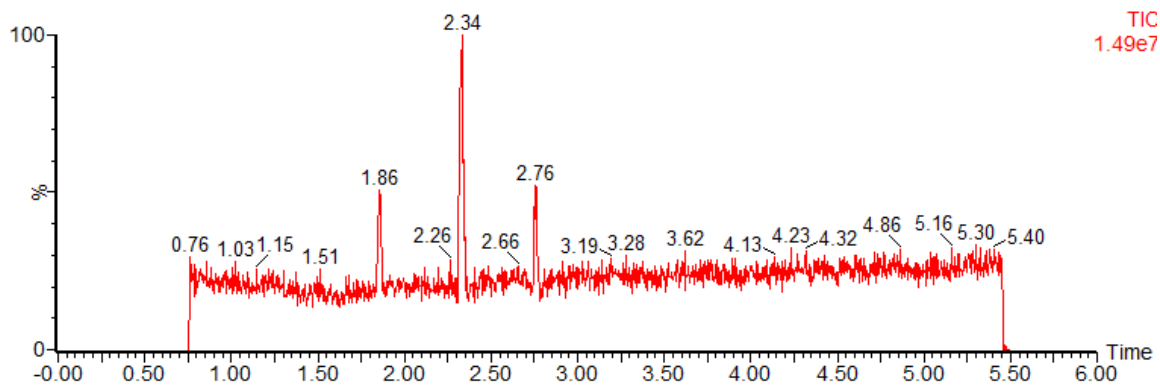

Raw Mass Spectrum (Retention Time 2.3 minutes)

8.60e4

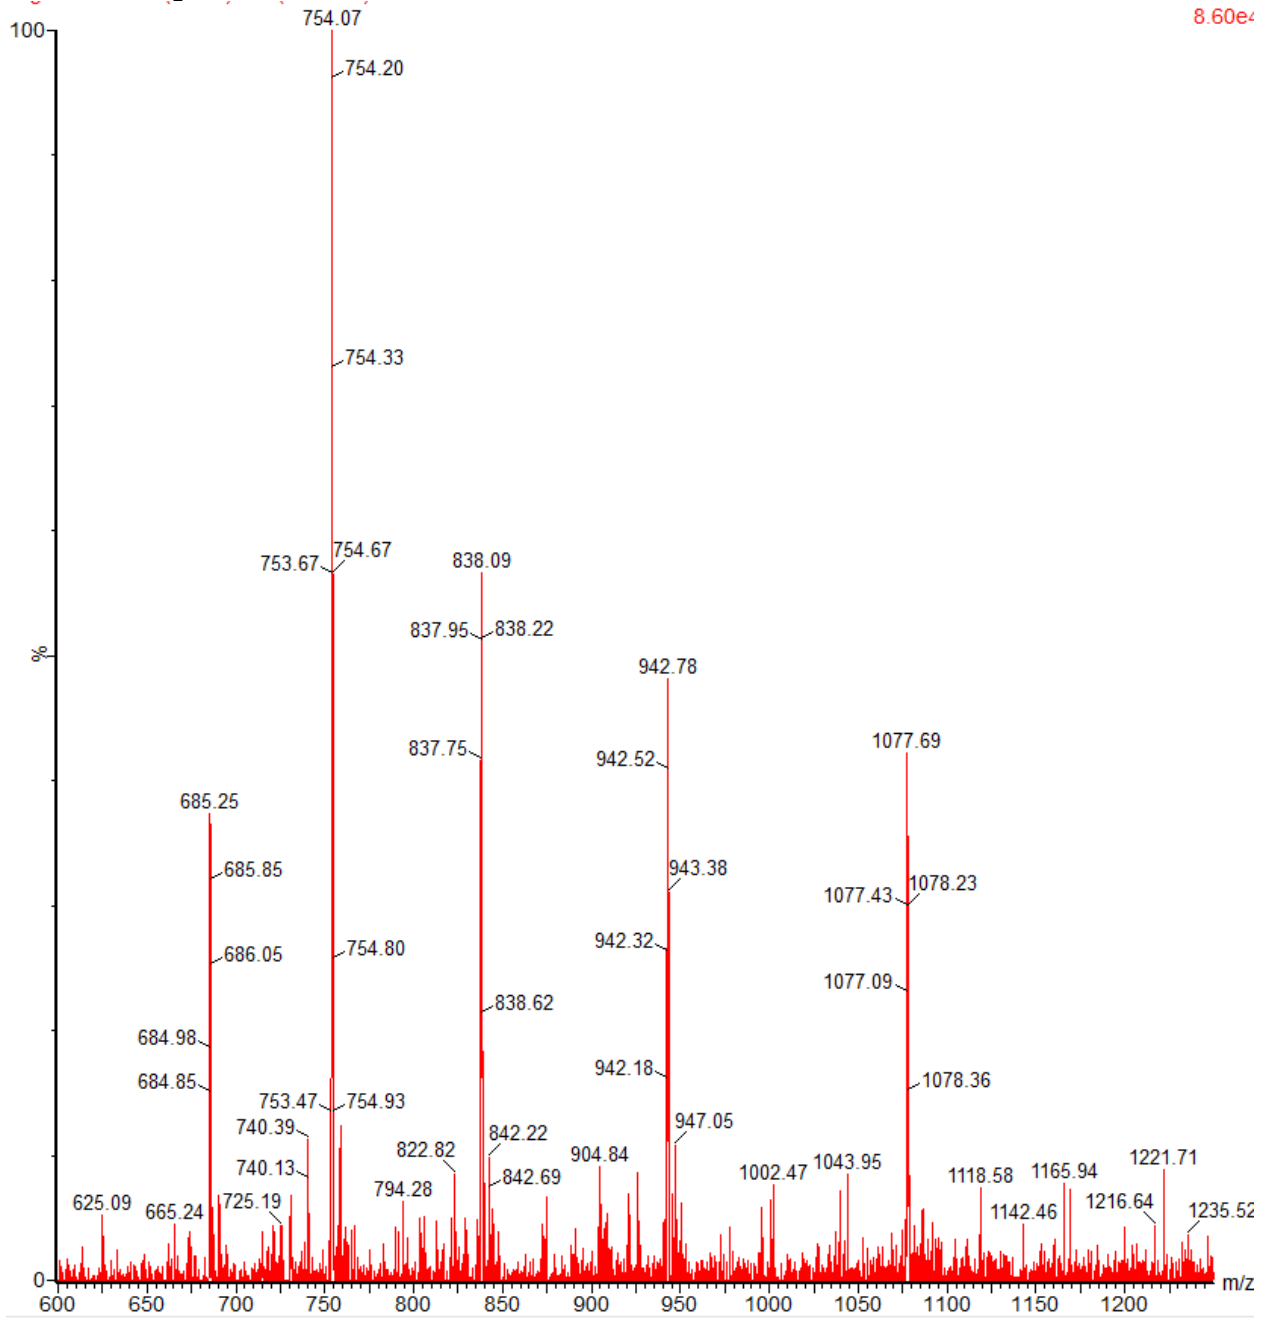



**Deconvoluted Mass Spectrum (Retention Time 2.3 minutes)**

1.64e5

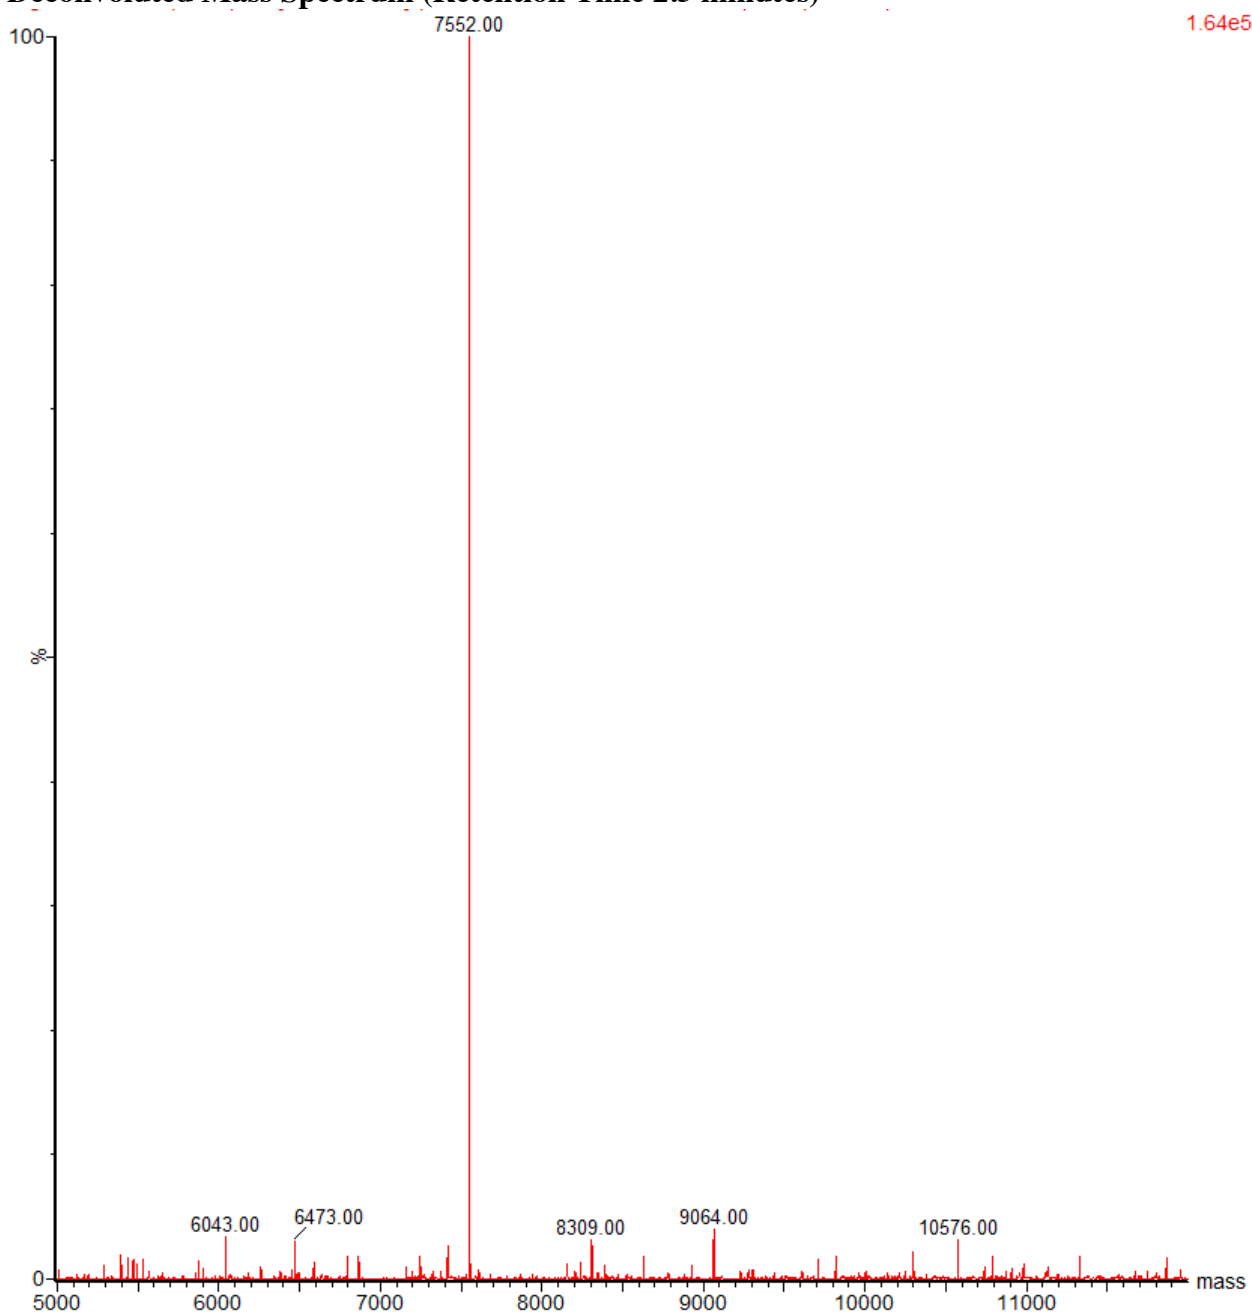

---

LCMS Characterization of **Double Label SI-24**

Produced from **SI-16** by General Procedure **3**:

Conversion (A260): 21%

Retention Time: 2.72 min

Expected Mass: 7752.2

Expected (M-8)/8 Ion: 968.02

Found Deconvoluted Mass: 7552.00

Found (M-6)/6 Ion: 968.19



Molecular Weight: 7752.21

Raw Mass Spectrum (Retention Time 2.7 Minutes)

6.12e4

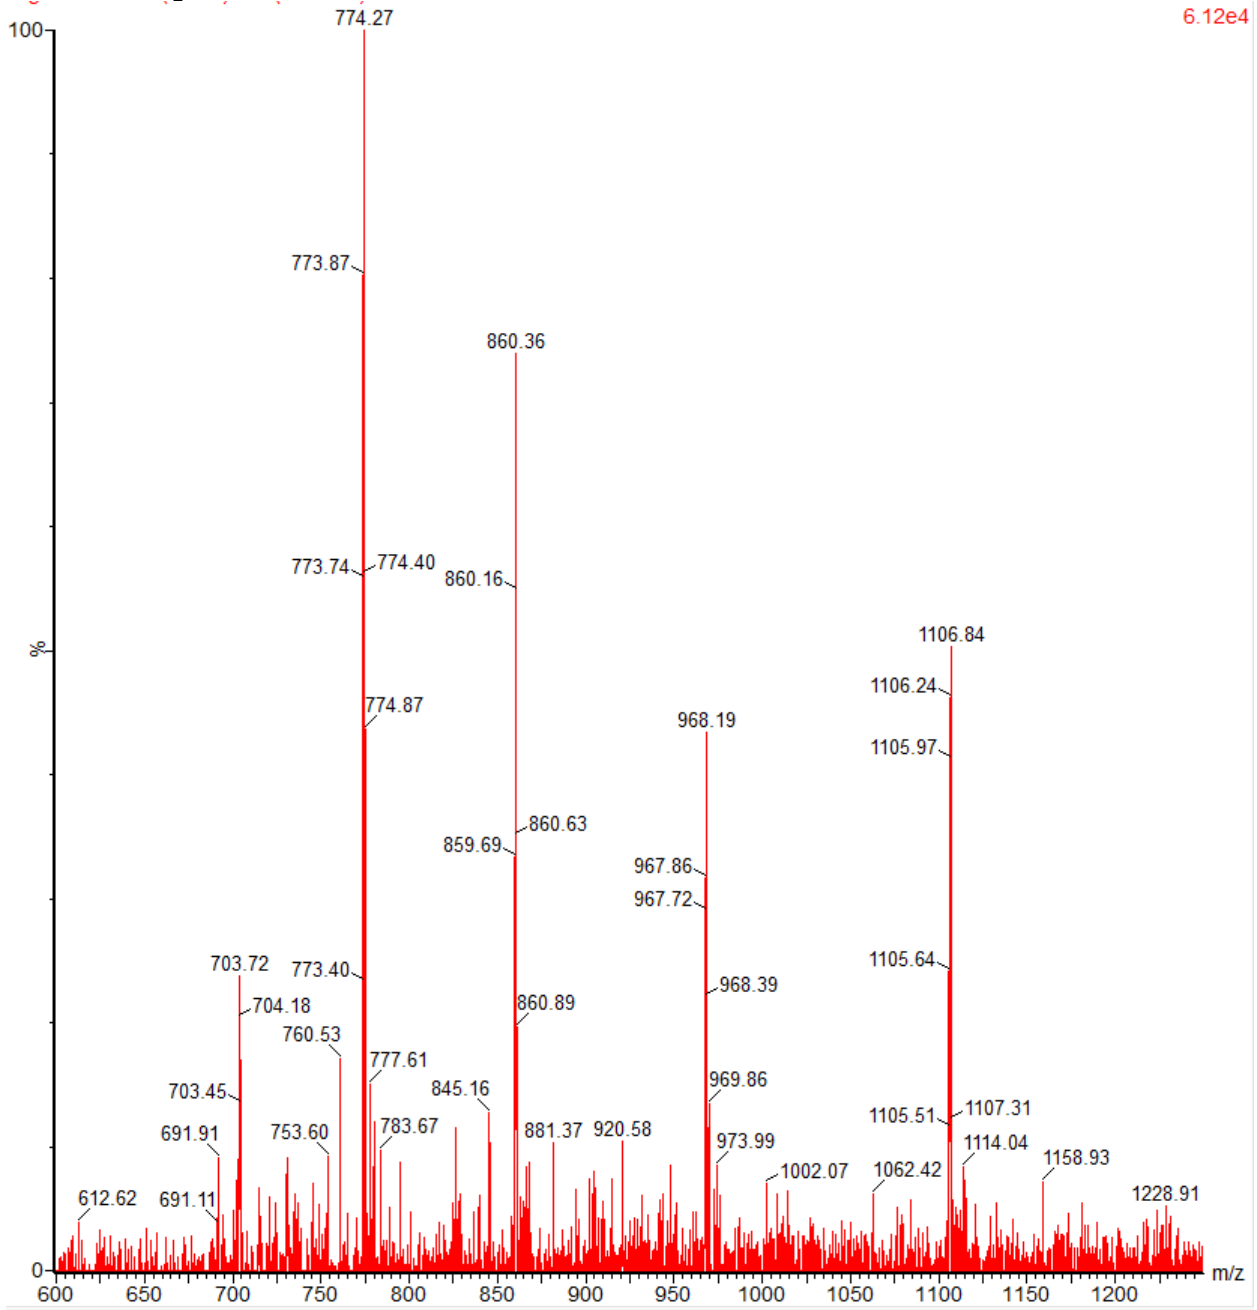

Deconvoluted Mass Spectrum (Retention Time 2.7 Minutes)

1.27e5

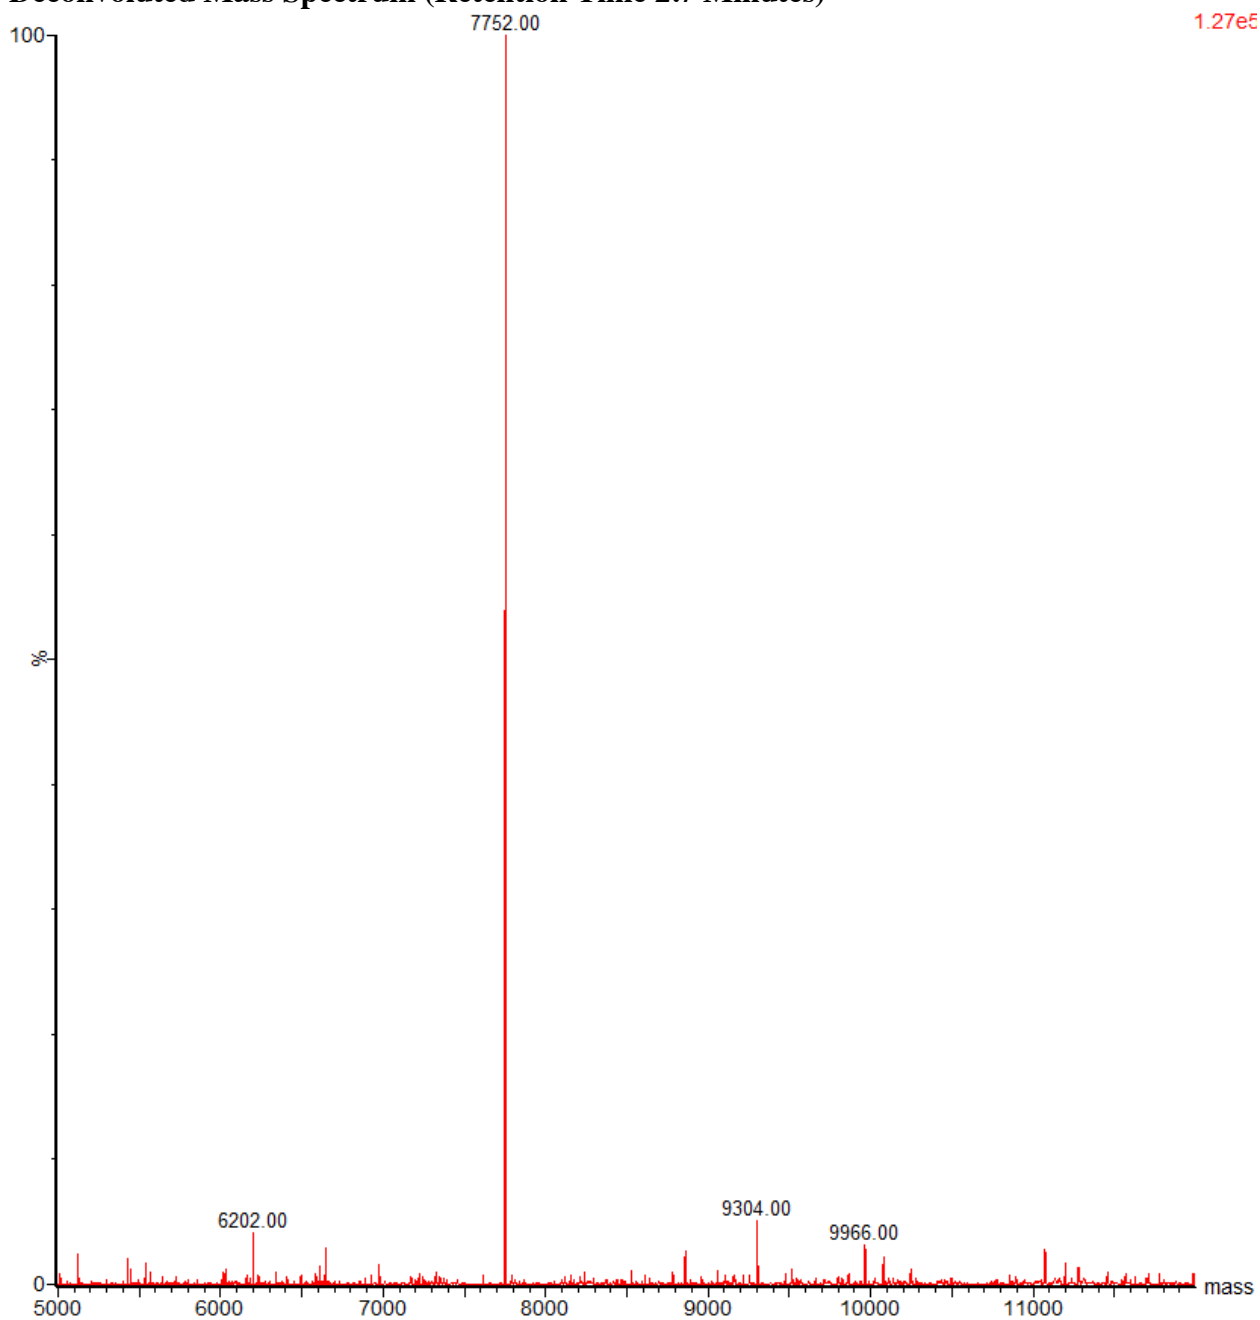

## Entry 6

LCMS Characterization of **Single Label SI-23**

Produced from **SI-16** by General Procedure **3**:

Conversion (A260): 50%

Retention Time: 2.29 min

Expected Mass: 7552.02

Expected (M-8)/8 Ion: 943.0

Found Deconvoluted Mass: 7551.00

Found (M-6)/6 Ion: 942.92

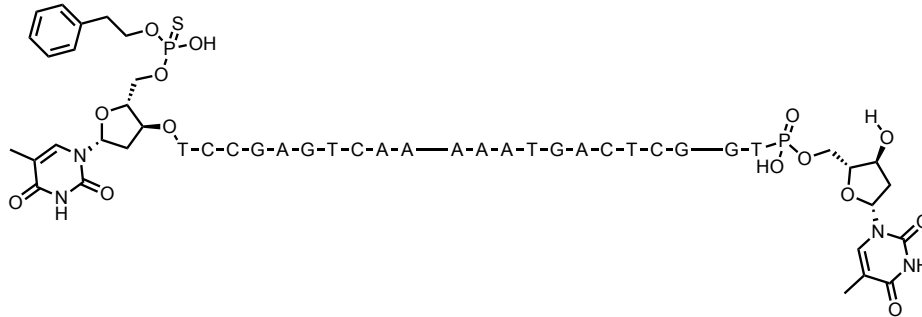

Molecular Weight: 7552.02

## A260

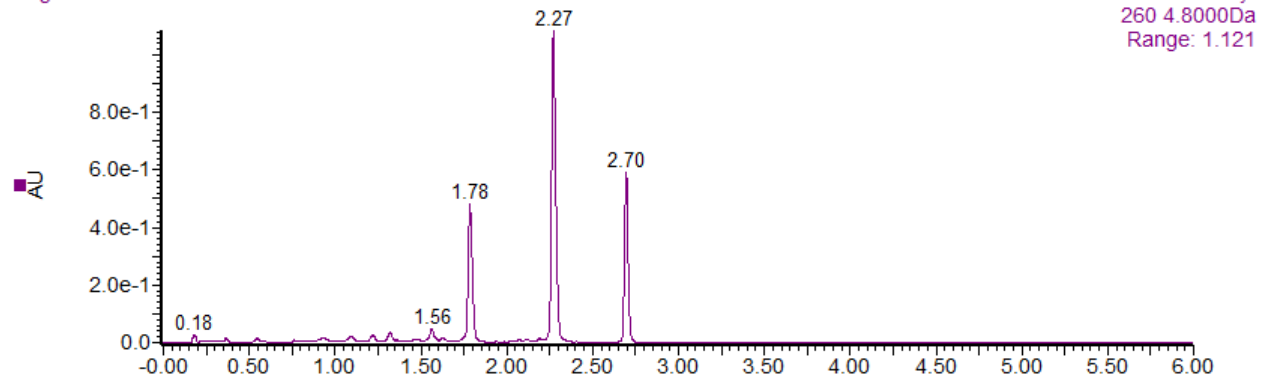

## TIC

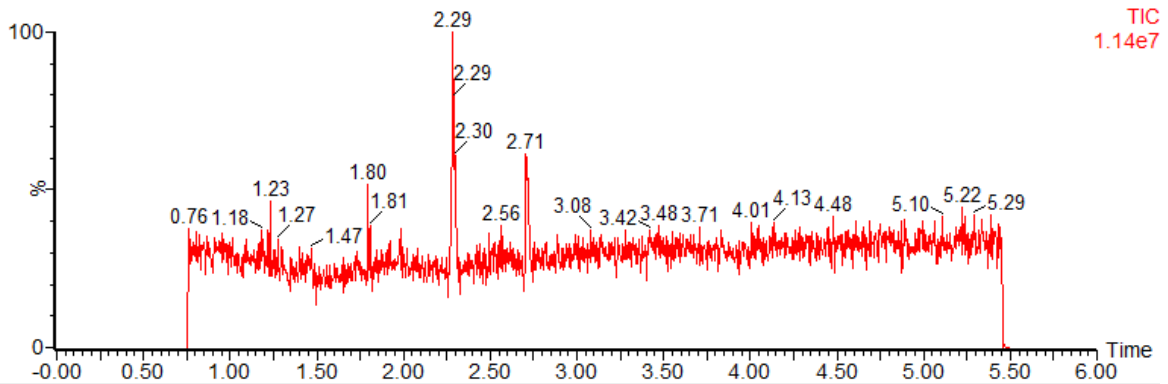

Raw Mass Spectrum (Retention Time 2.3 minutes)

0.1384

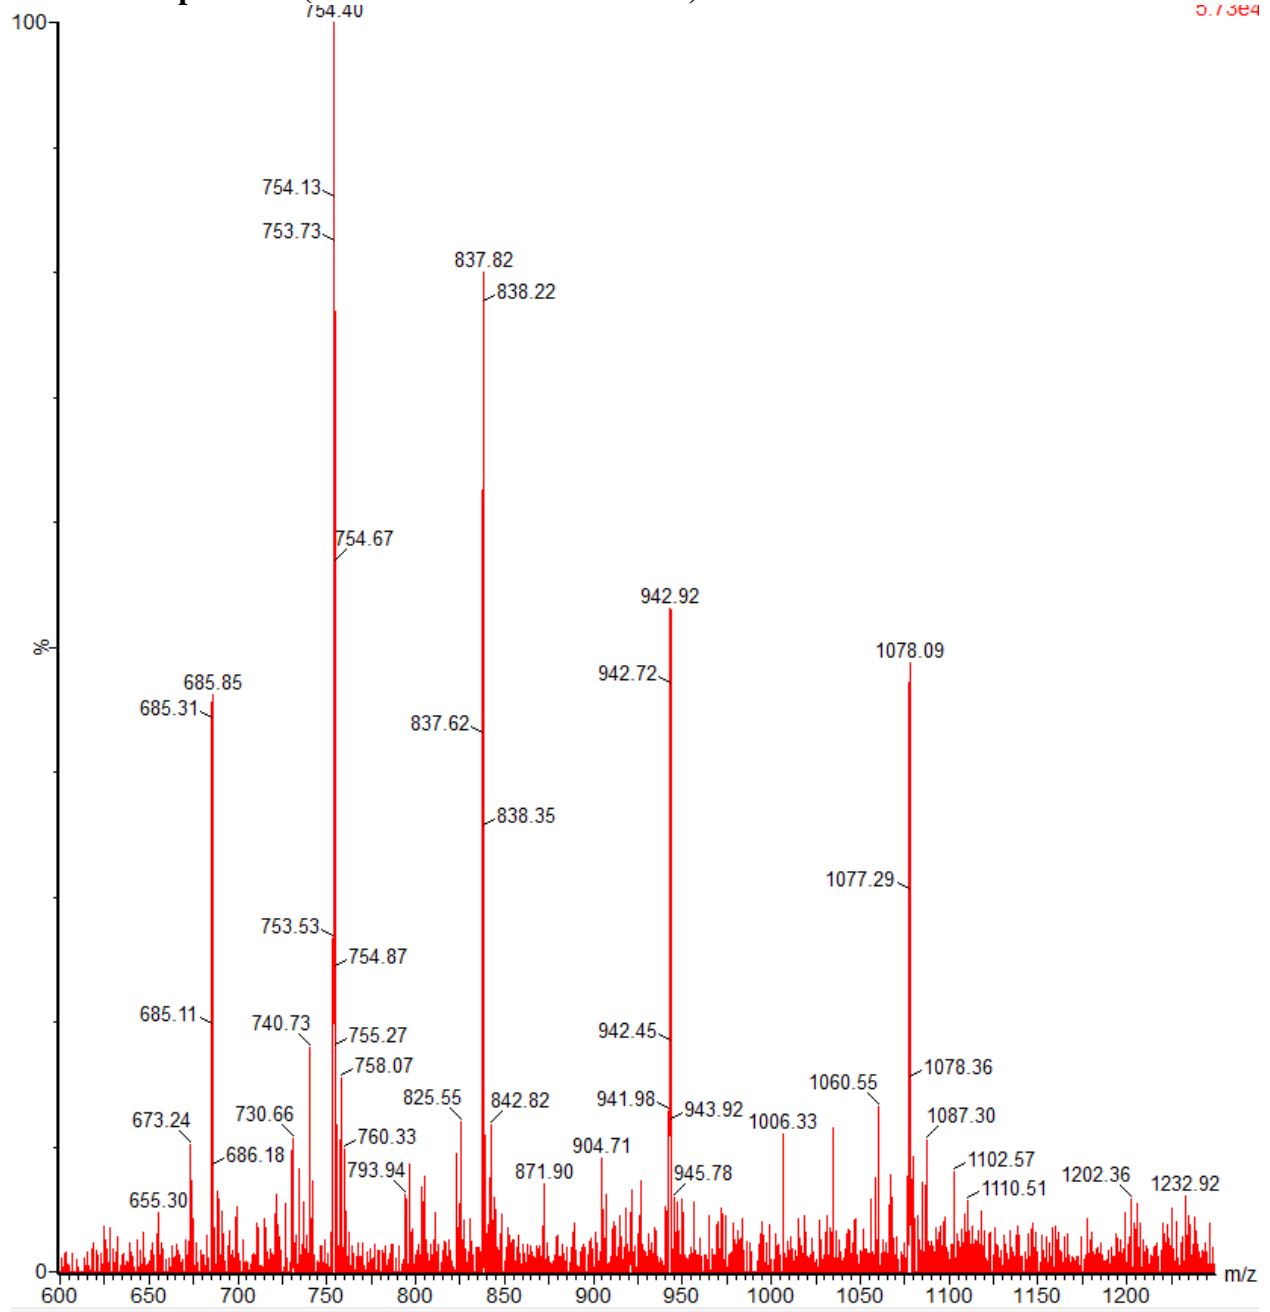

---

---

**Deconvoluted Mass Spectrum (Retention Time 2.3 minutes)**

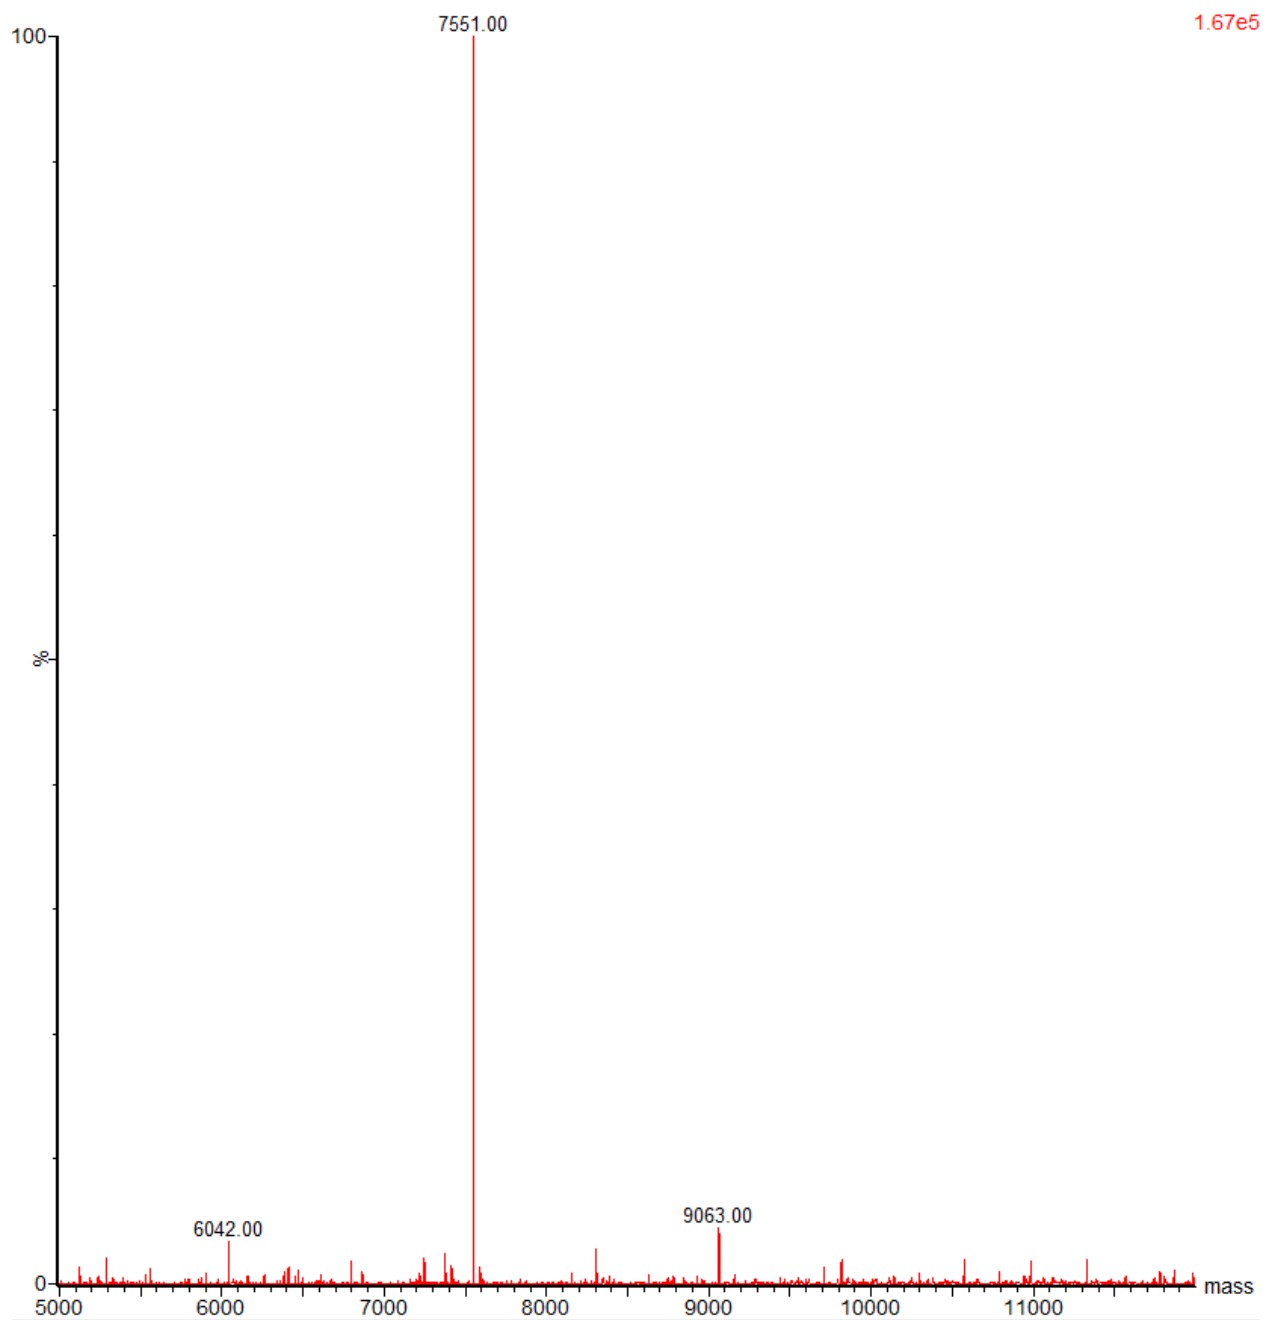

---

LCMS Characterization of **Double Label SI-24**

Produced from **SI-16** by General Procedure **3**:

Conversion (A260): 25%

Retention Time: 2.72 min

Expected Mass: 7752.2

Expected (M-8)/8 Ion: 968.02

Found Deconvoluted Mass: 7552.00

Found (M-6)/6 Ion: 967.86



Molecular Weight: 7752.21



Raw Mass Spectrum (Retention Time 2.7 Minutes)

4.18e4

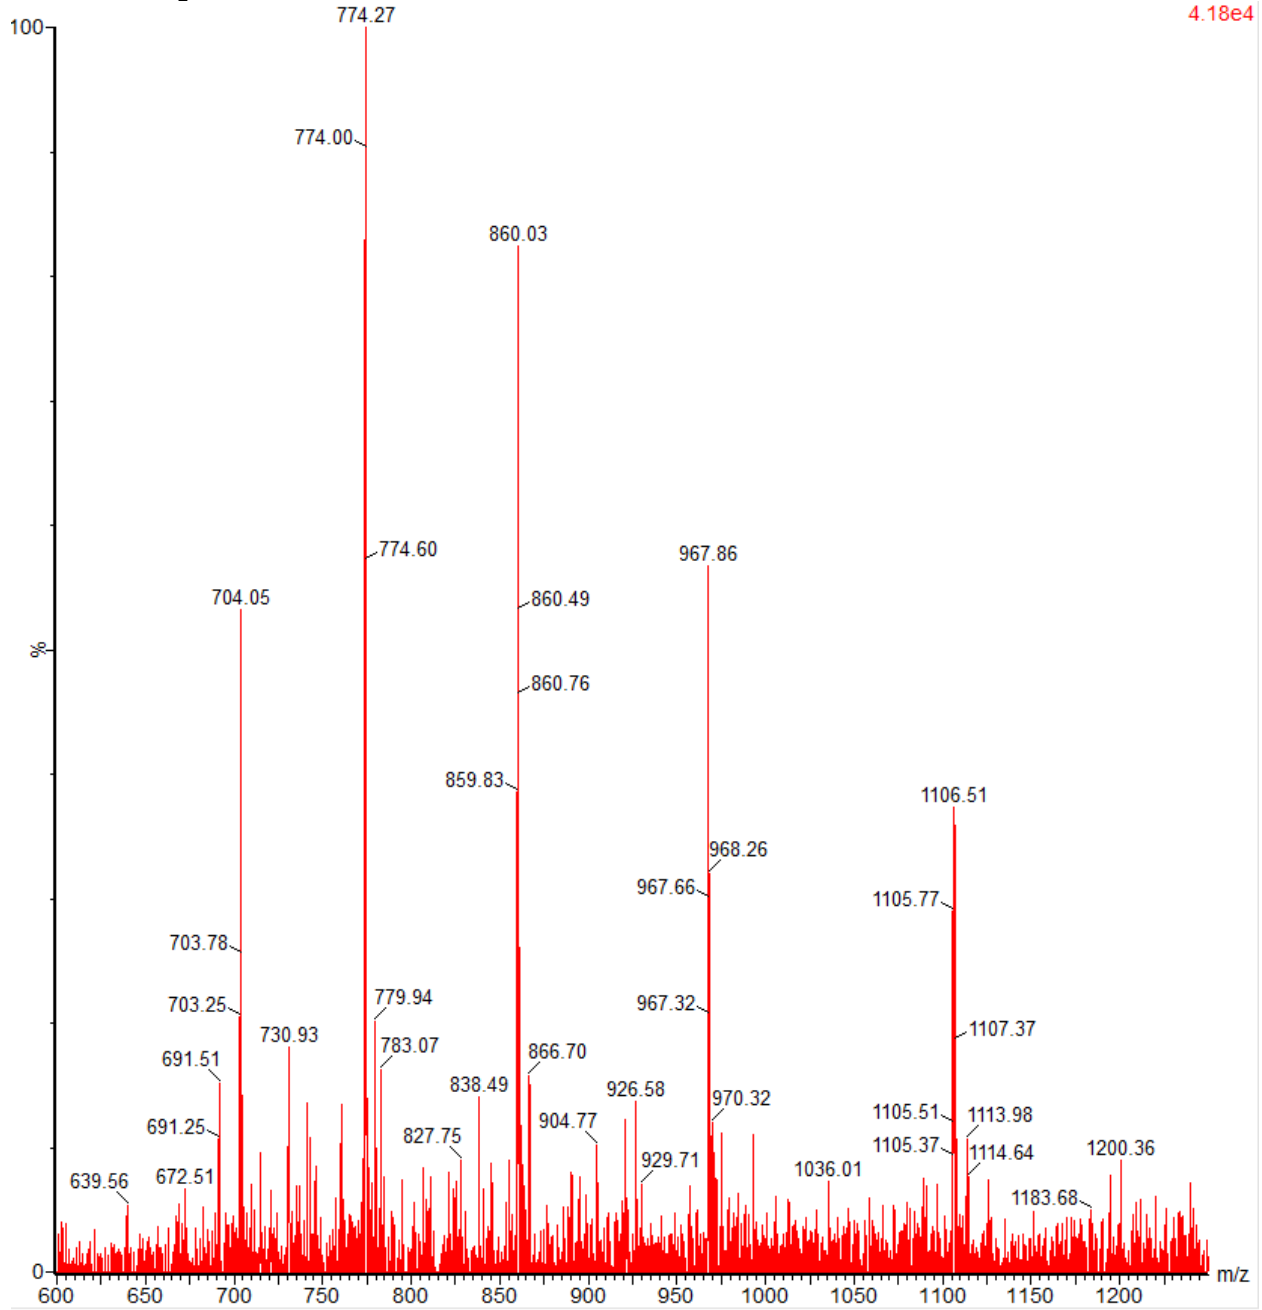

# Deconvoluted Mass Spectrum (Retention Time 2.7 Minutes)

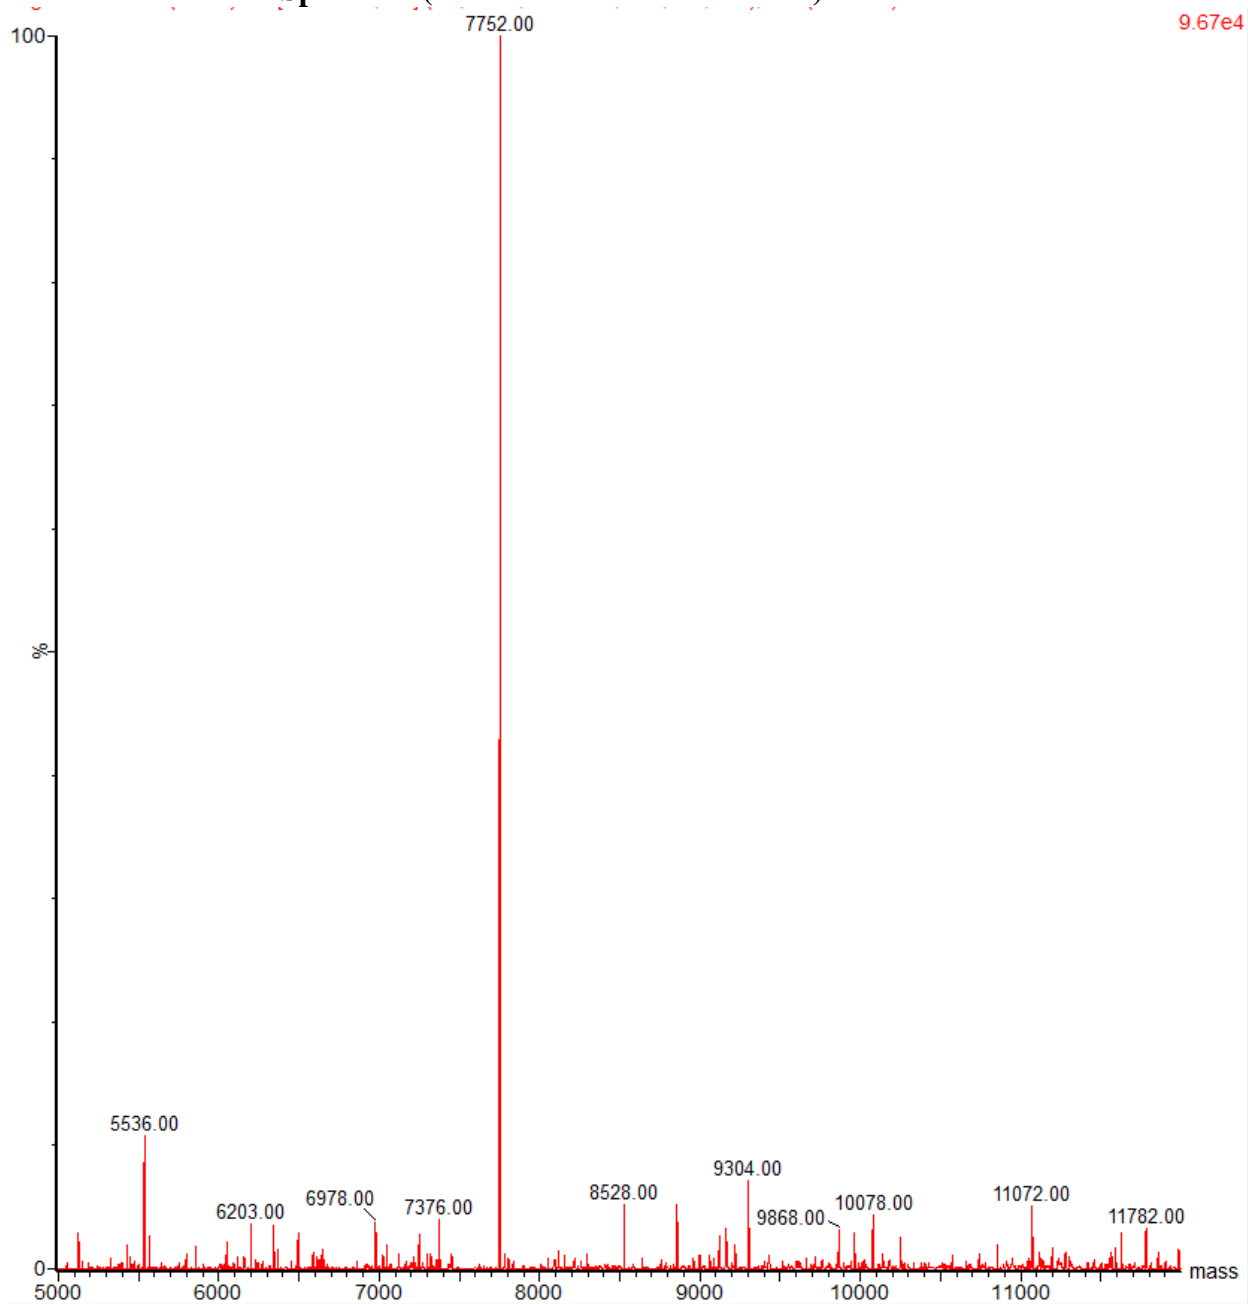

## Entry 7

LCMS Characterization of **Single Label SI-23**

Produced from **SI-16** by General Procedure **3**:

Conversion (A260): 33%

Retention Time: 2.29 min

Expected Mass: 7552.02

Expected (M-8)/8 Ion: 943.0

Found Deconvoluted Mass: 7552.00

Found (M-6)/6 Ion: 943.18

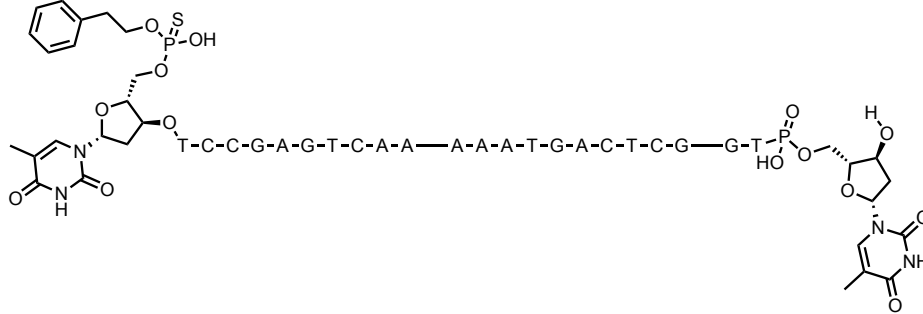

## A260

### DTF-6-197-H1

Oligo03528

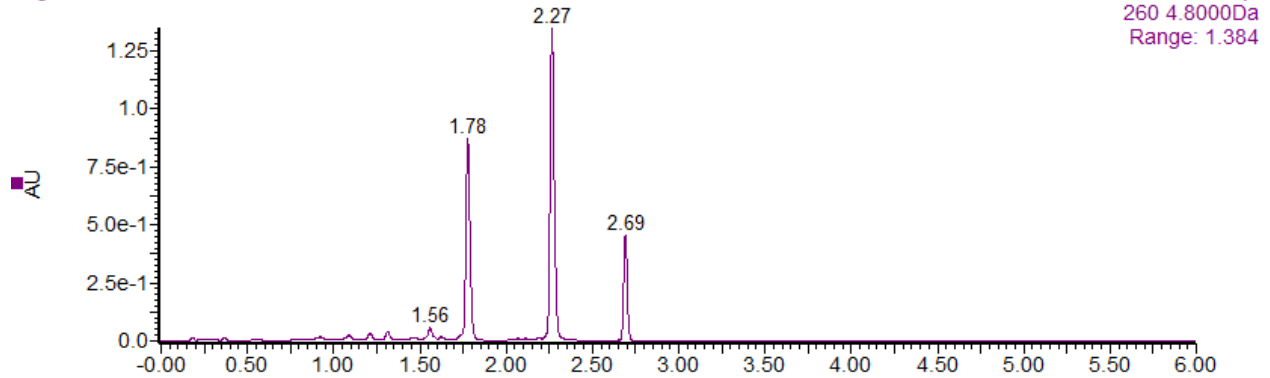

## TIC

Oligo03528

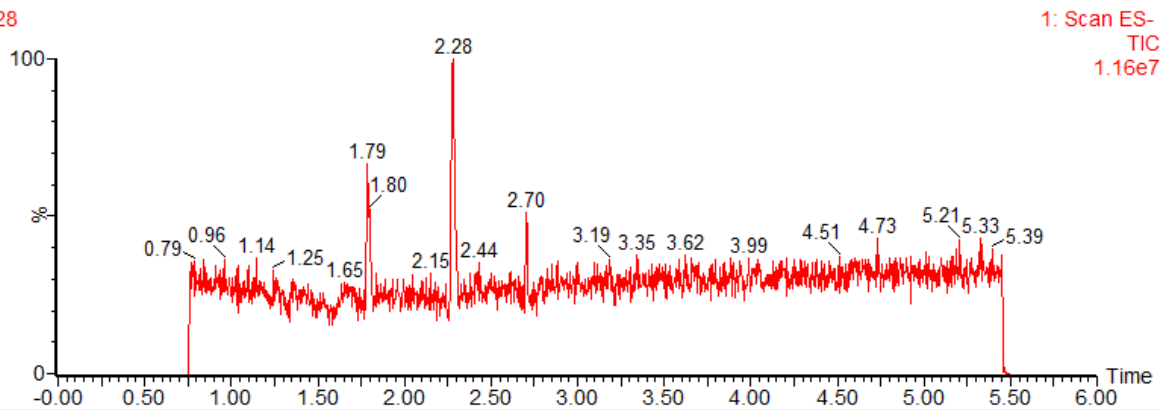

Raw Mass Spectrum (Retention Time 2.3 minutes)

1.6/re4

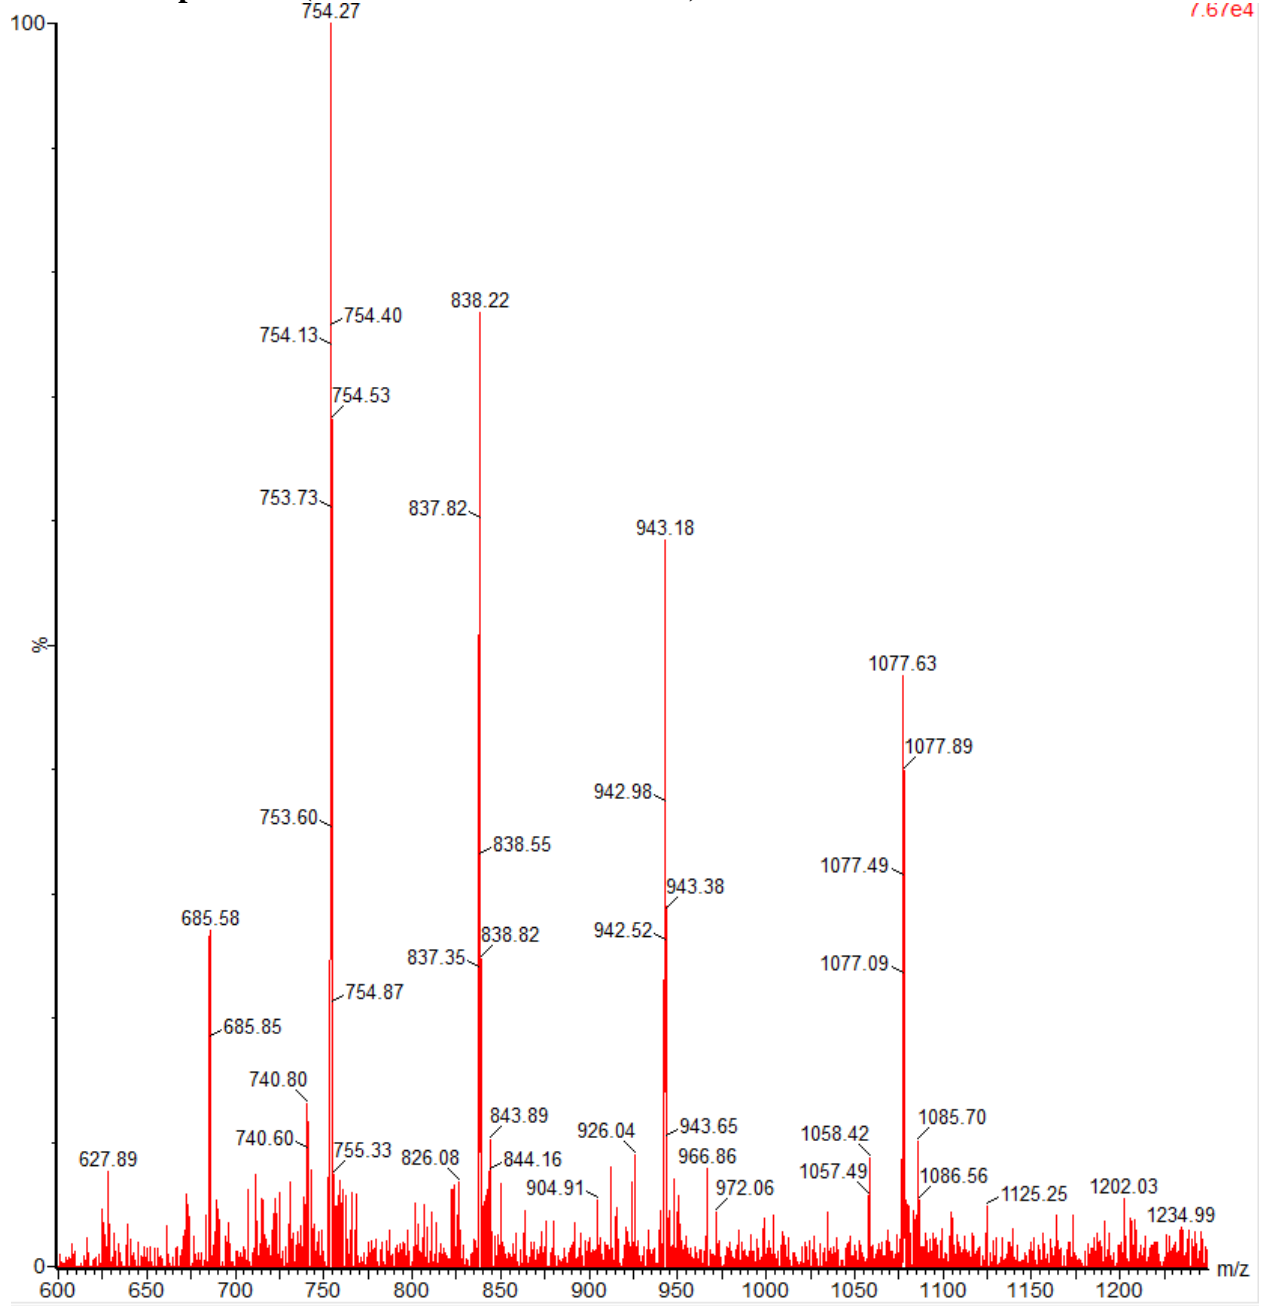

Deconvoluted Mass Spectrum (Retention Time 2.3 minutes)

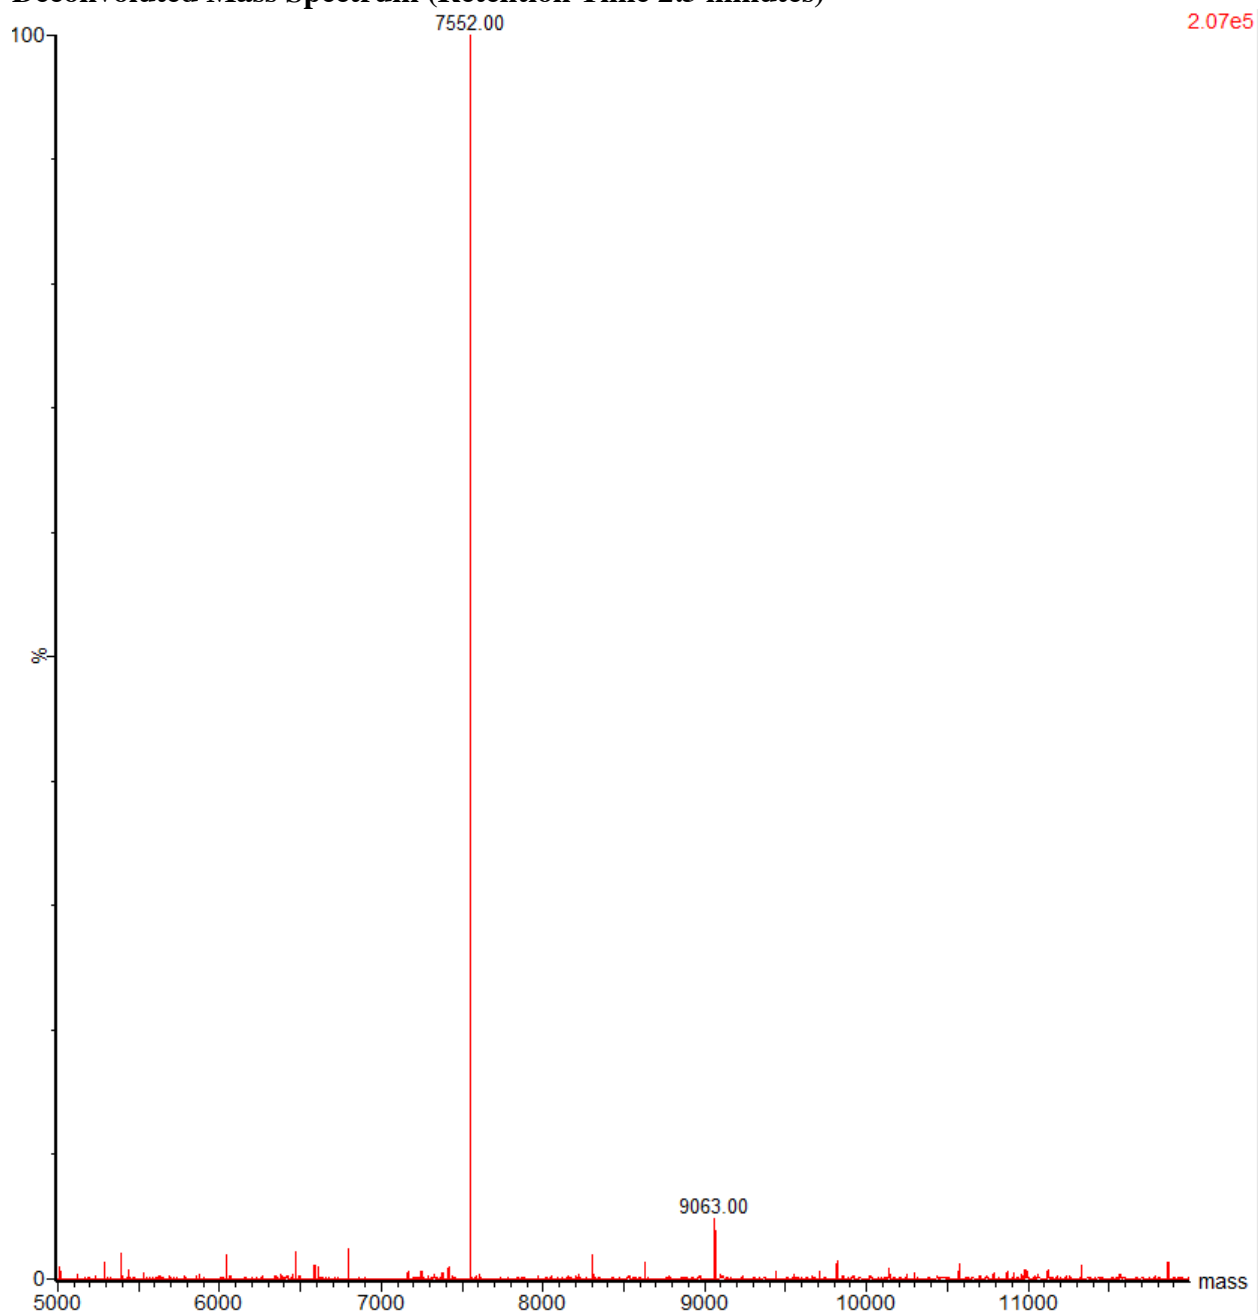

---

### Structure Confirmation of SI-23

A crude solution of **SI-23** in water (100  $\mu\text{M}$ ) was injected on the Waters I-Class ToF for peak identification. The MS cone voltage was then increased from 5 mV to 30 mV and the same sample was reinjected to fragment the modified oligonucleotide. Diagnostic mass fragments were then extracted, and their presence confirmed in the total ion current. They are plotted below.

## Mass Fragmentation of SI-23

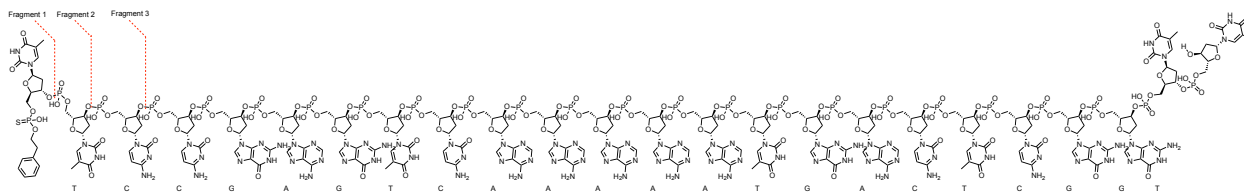

Exact Mass: 7548.27  
Molecular Weight: 7552.02

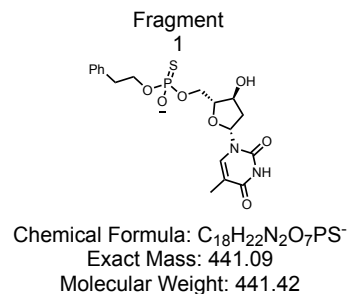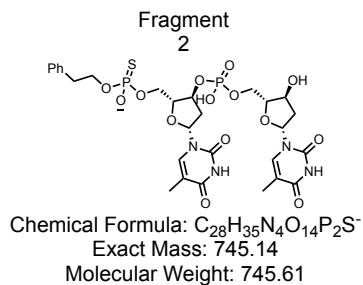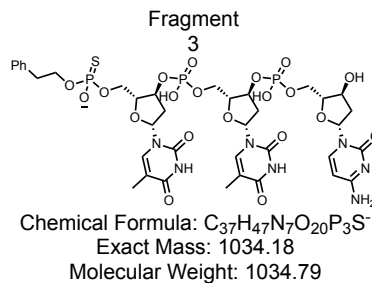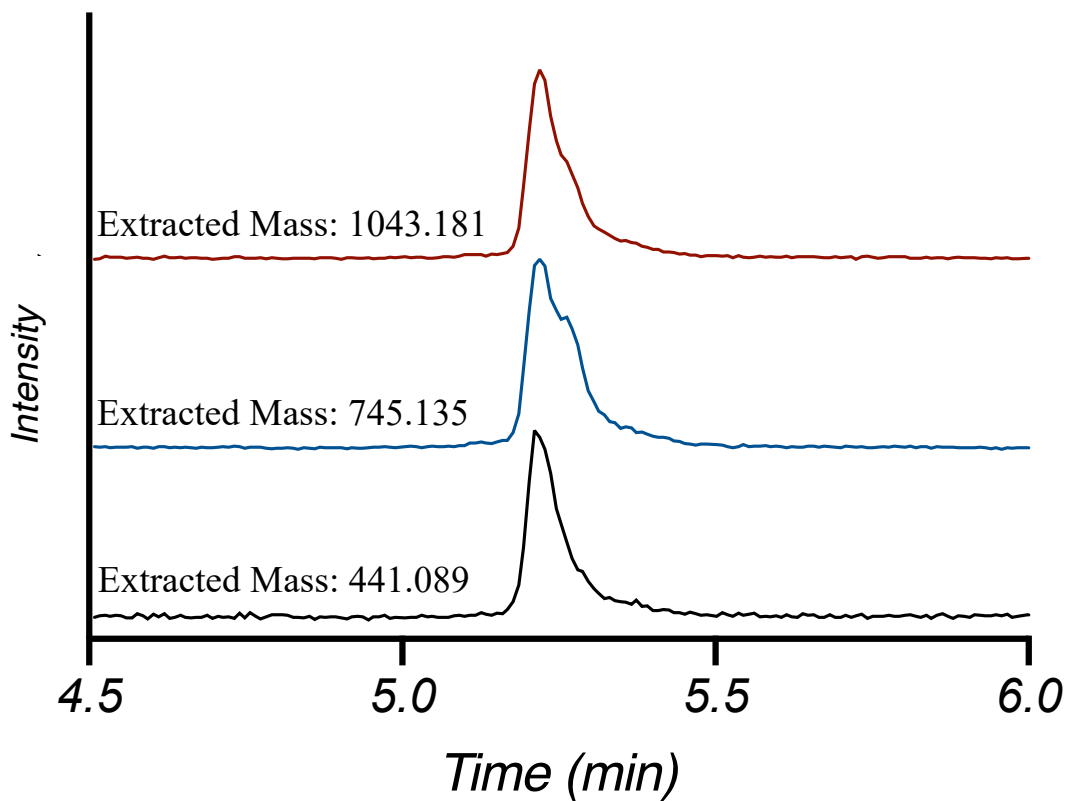

---

---

## T4PNK Phosphorylation then SENDR

### Protocol

Nonphosphorylated DNA **SI-16** was phosphorylated at the 5' end by T4PNK. Briefly, 5 nMol DNA was added to a PCR tube and containing CutSmart® (1X), 1 mM ATP, and 5 mM DTT (from 5x stocks). T4PNK was added (2 uL) and the reaction volume was brought to 50  $\mu$ L total. The reaction tube was allowed to incubate for 30 minutes at 37°C. After 30 minutes the reaction mixture was added directly to the Strata XL-A support in PBS (500 uL) and vortexed. The support was dried according to General Procedure 2, and standard SENDR conditions were applied.

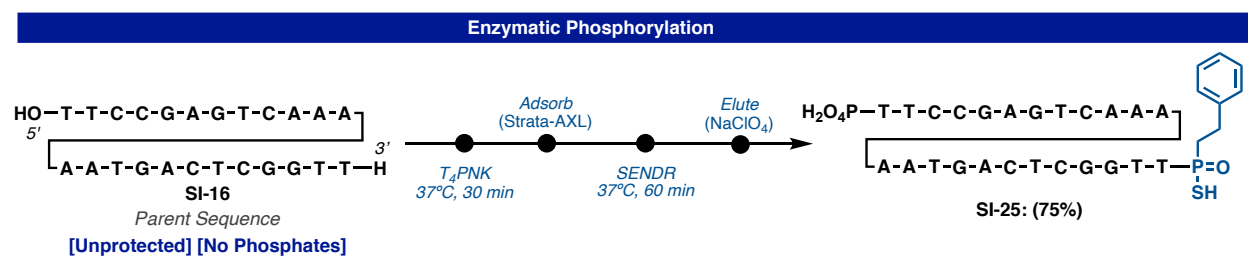



LCMS Characterization of **SI-25**

Produced from **SI-16**:

Conversion (A260): 75%

Retention Time: 2.28 min

Expected Mass: 7632.00

Expected (M-8)/8 Ion: 953.0

Found Deconvoluted Mass: 7632.00

Found (M-6)/6 Ion: 952.78

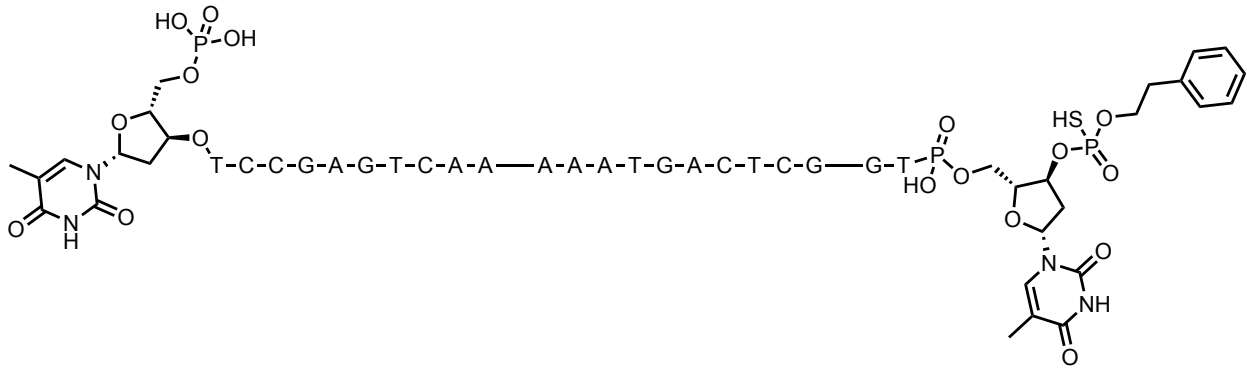

Molecular Weight: 7632.00

A260

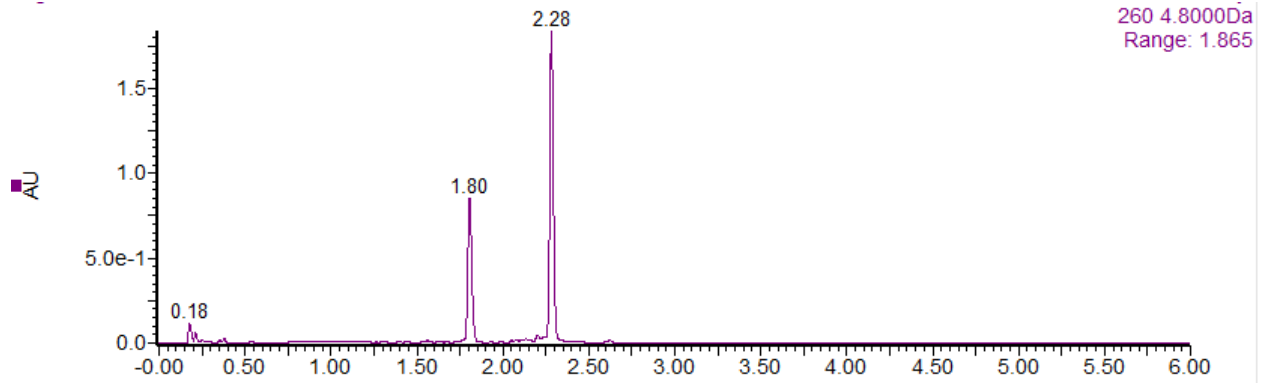

TIC

Oligo03516

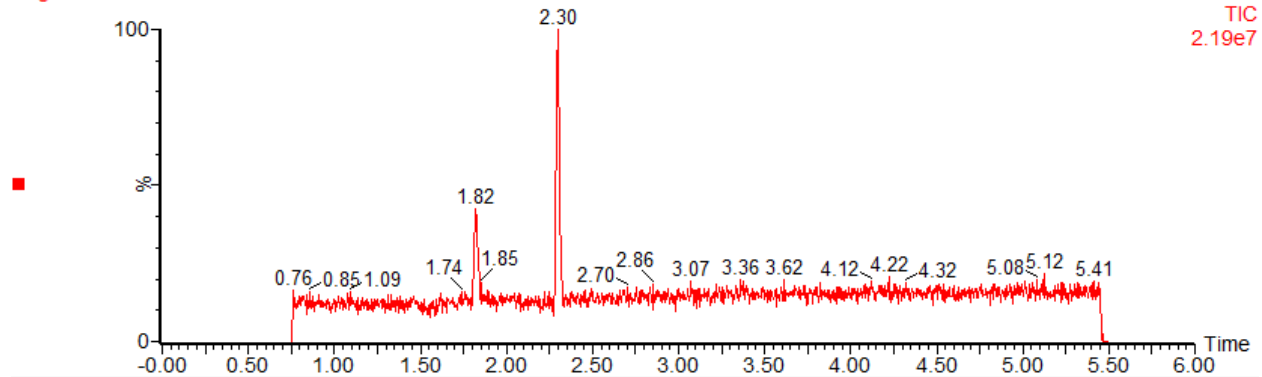

Raw Mass Spectrum (Retention Time 2.30)

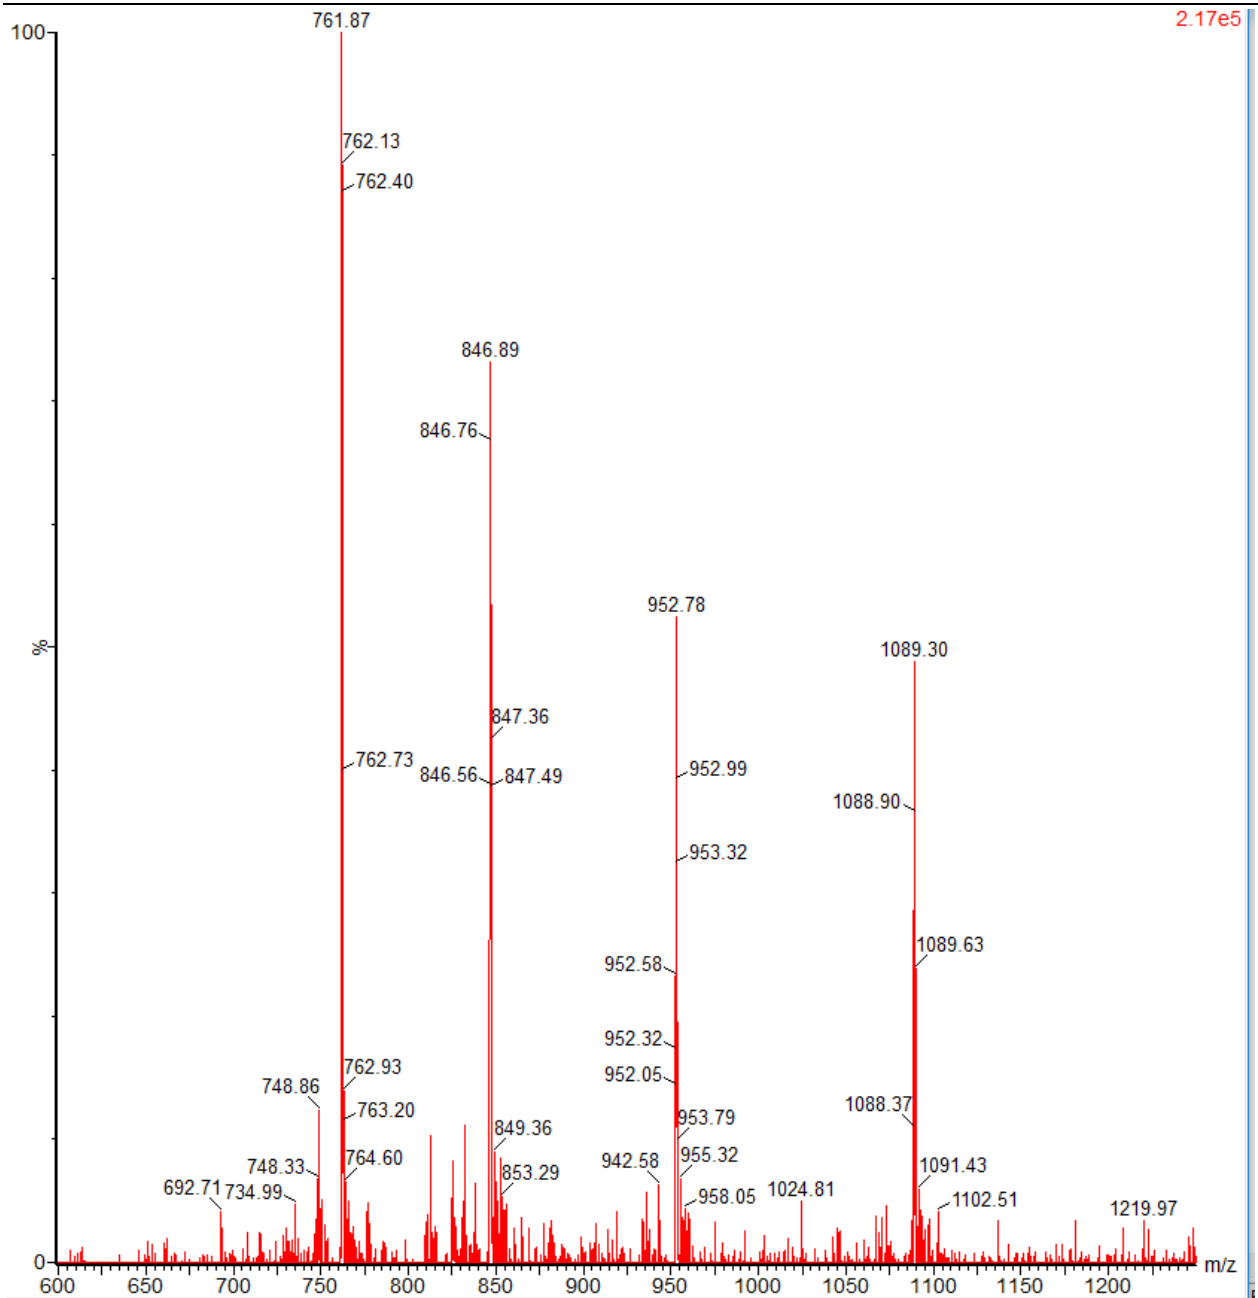

Deconvulted Mass Spectrum (Retention Time 2.30)

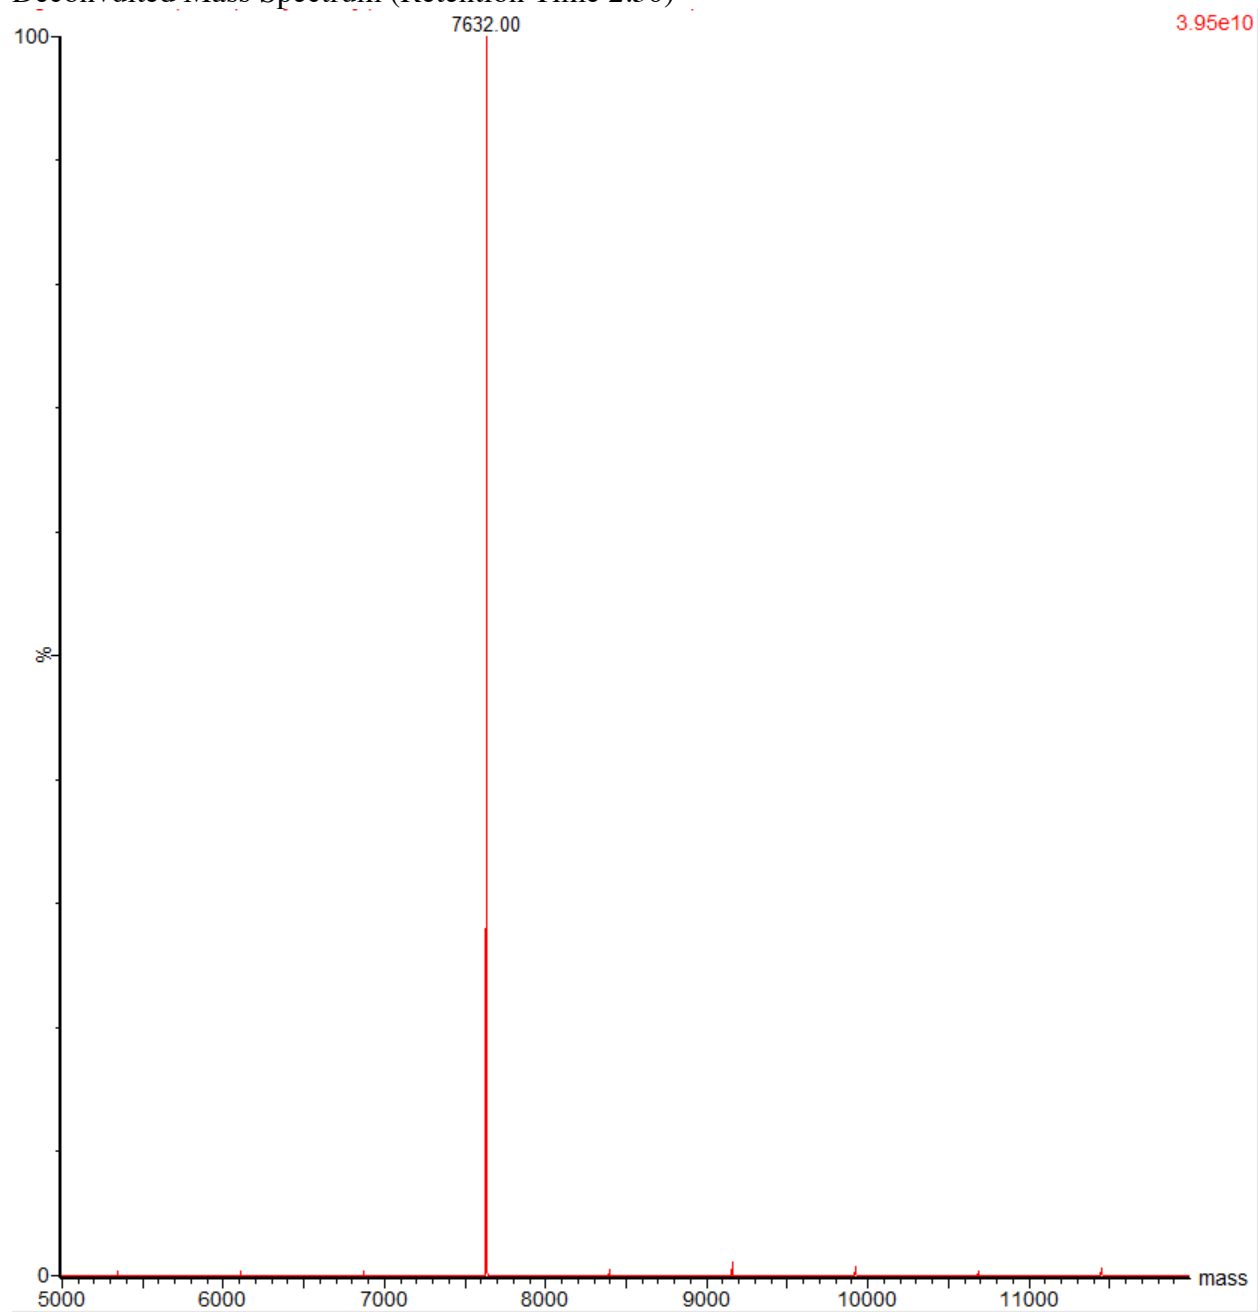

## Sequence Independence

### Procedure

SENDR was optimized by performing reactions in microcentrifuge tube as described in *General Procedure 2*. Briefly, 5 nmol of DNA **1** or **2** was loaded onto 100  $\mu\text{L}$  of equilibrated resin. This loaded resin was washed with DMA (500  $\mu\text{L}$  twice) and dry THF (500  $\mu\text{L}$  three times) and dried under vacuum.

**$\Psi$ -1** in MeCN (150 mM, 250  $\mu\text{L}$ ) was added to the loaded and dried resin. Then DBU (450 mM, 18  $\mu\text{L}$ ) was added to the reaction mixture. The reaction tube was vortexed for 30 seconds and incubated at room temperature for various amounts of time. The reactions were worked up by aspirating and discarding the reaction solution, and washing the resin bed with MeCN (500  $\mu\text{L}$ ) and 1:1 MeCN:PBS (500  $\mu\text{L}$ ). Elute buffer (300  $\mu\text{L}$ ) was added to the resin bed and the tube was agitated by orbital shaker for 5-10 minutes. The DNA containing elution buffer was collected by carefully pipetting the supernatant. DNA was isolated *via* ethanol precipitation. Ethanol precipitation was performed by adding 10% v/v of a NaCl solution (30  $\mu\text{L}$ , 5M) to the elute buffer and three volumes of cold ethanol ( $-20\text{ }^\circ\text{C}$ ) were added to the tube ( $\sim 1000\mu\text{L}$ ) and incubated for 18 hours at  $-20\text{ }^\circ\text{C}$ . The tube was then centrifuged at 13,000 rpm for 15 minutes to pellet the DNA, and the extra ethanol was decanted off. The tubes were dried *via* speed vacuum and the DNA was dissolved and HPLC-MS analysis was performed.

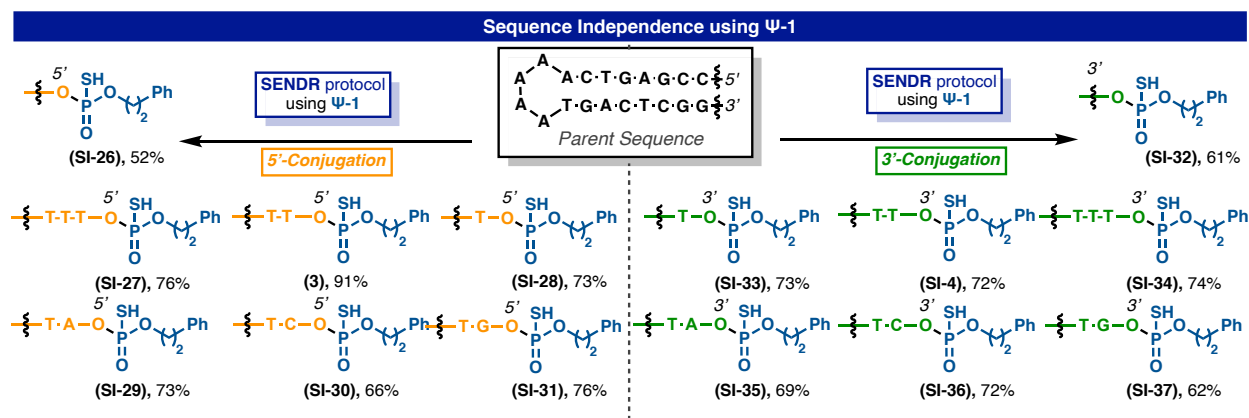

## Characterization of Sequence Independence

### LCMS Characterization of SI-26

Produced from **SI-1** by General Procedure **2**:

Yield (A260): 52%

Expected Mass: 6415.22

Expected (M-6)/6 Ion: 1068.2

Found Deconvoluted Mass: 6415.00

Found (M-6)/6 Ion: 1068.16

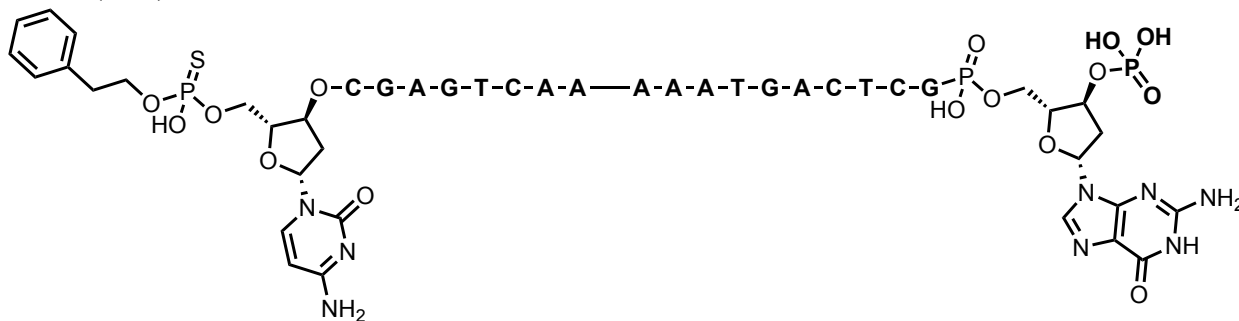

Exact Mass: 6412.05  
Molecular Weight: 6415.22

### A260 Chromatogram

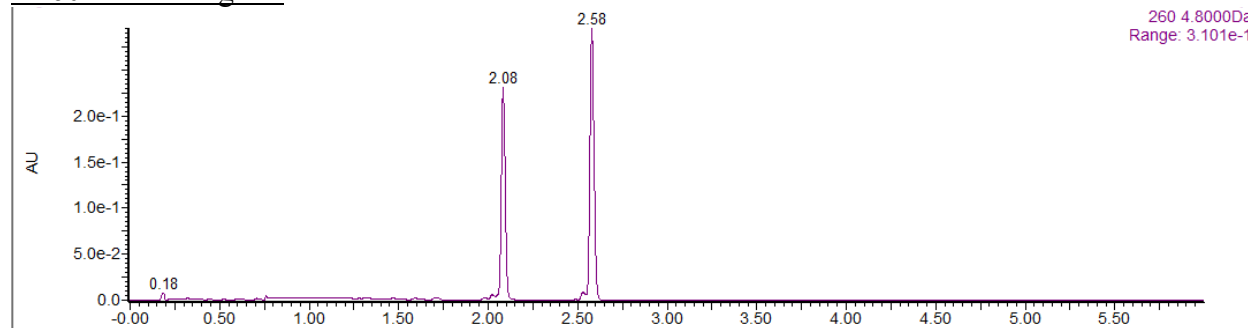

Mass Spectrum (RT= 2.58 min)

2.54e6

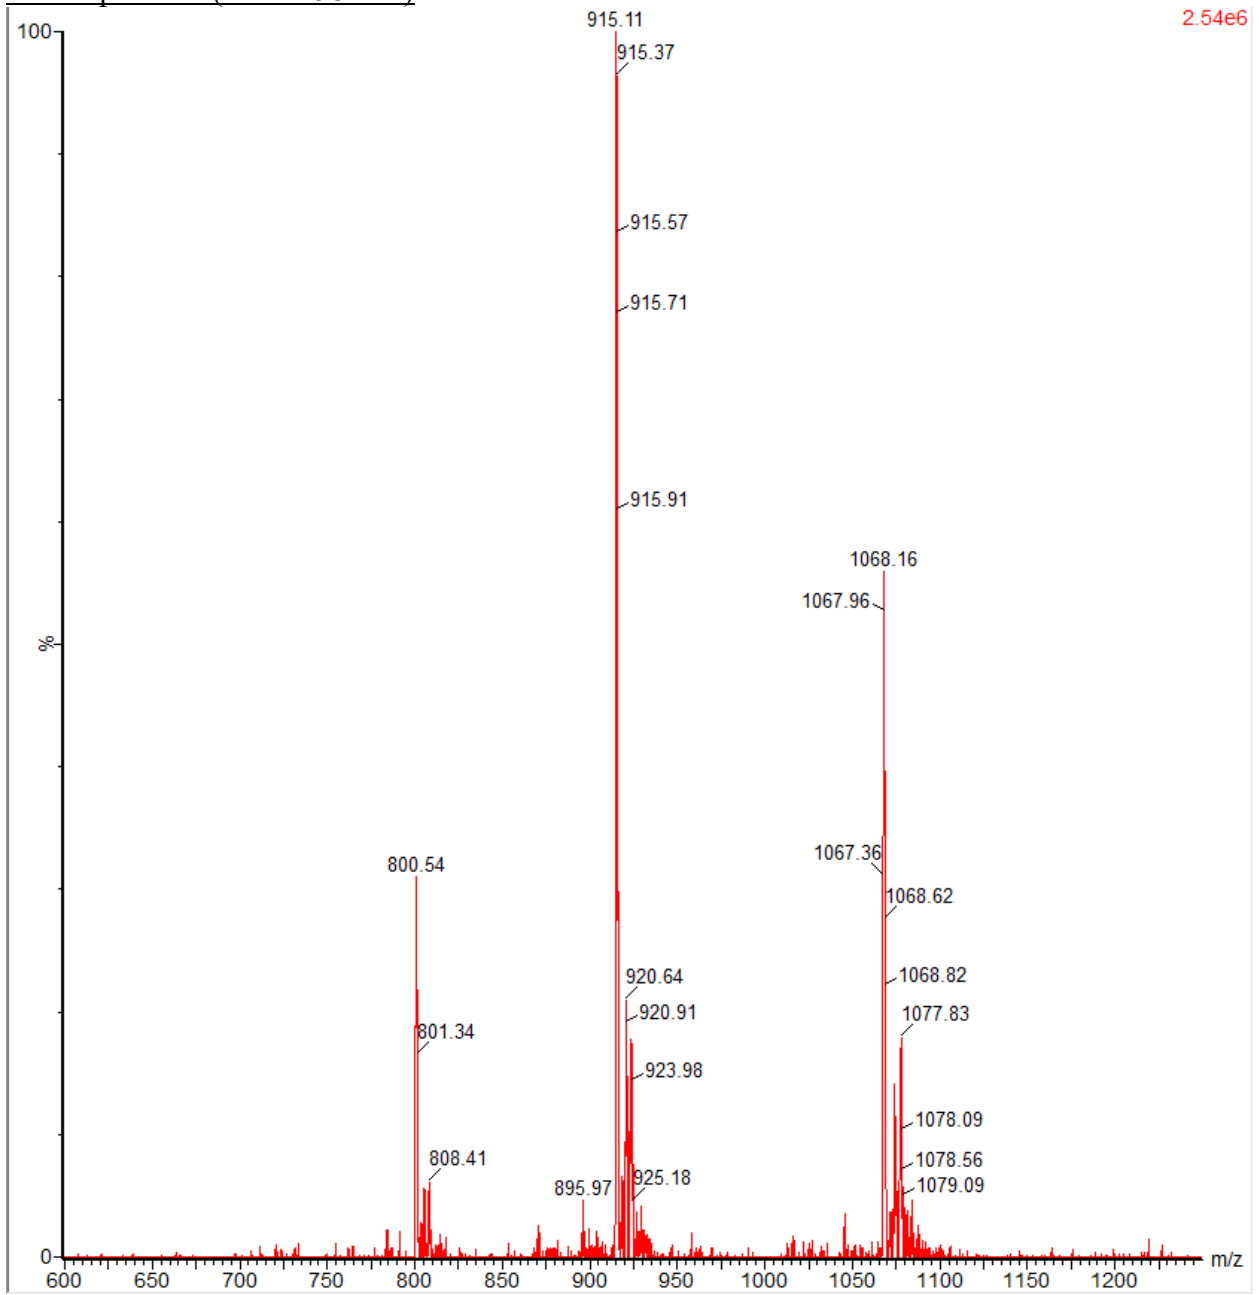

# Deconvoluted Mass Spectrum

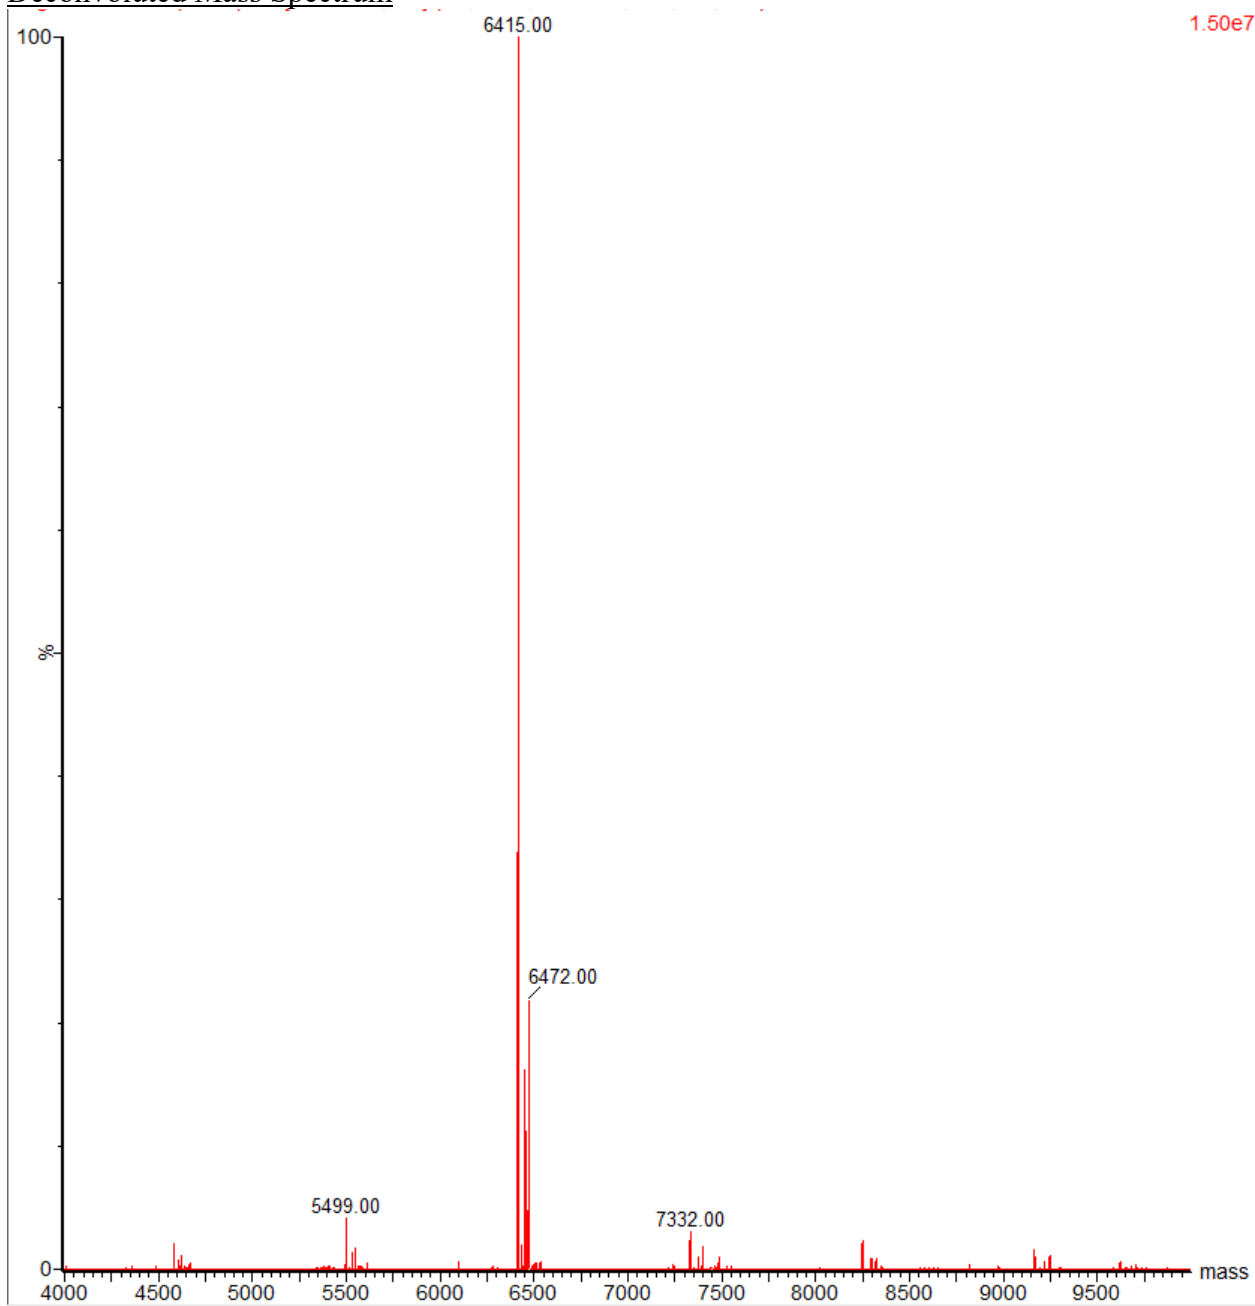

## LCMS Characterization of SI-27

Produced from **SI-2** by General Procedure **2**:

Yield (A260): 76%

Expected Mass: 7327.81

Expected (M-6)/6 Ion: 1220.2

Found Deconvoluted Mass: 7328.00

Found (M-6)/6 Ion: 1220.11

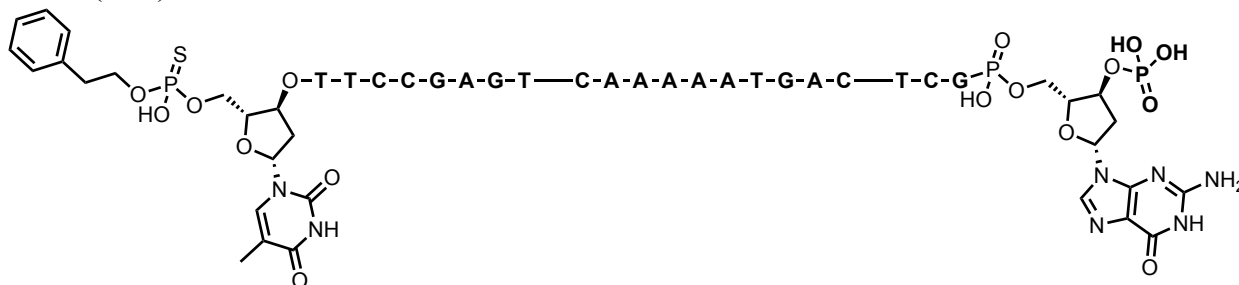

Exact Mass: 7324.19  
Molecular Weight: 7327.81

### A260 Chromatogram

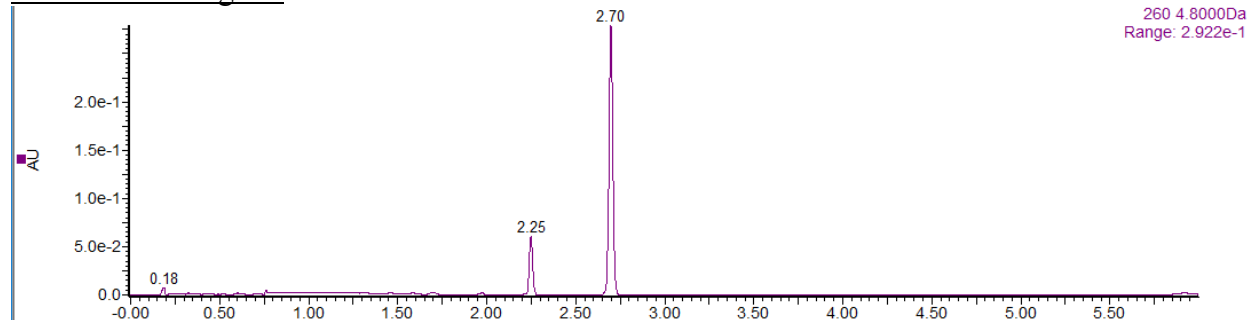



Mass Spectrum (RT= 2.70 min)

7.38e5

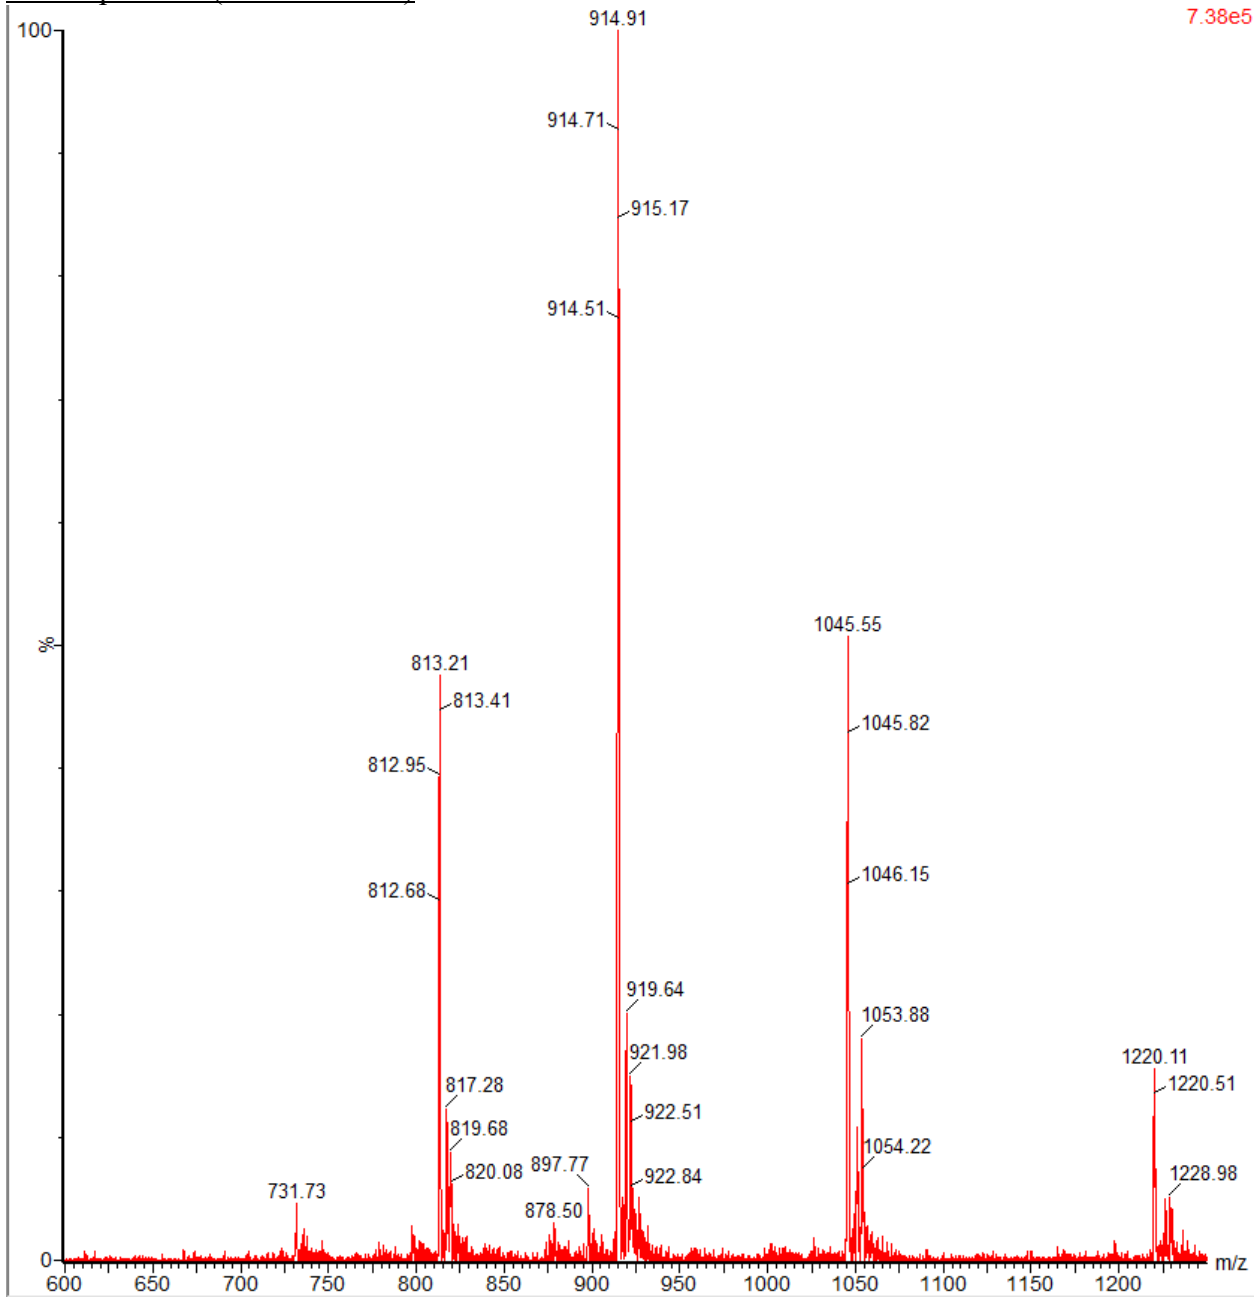

# Deconvoluted Mass Spectrum

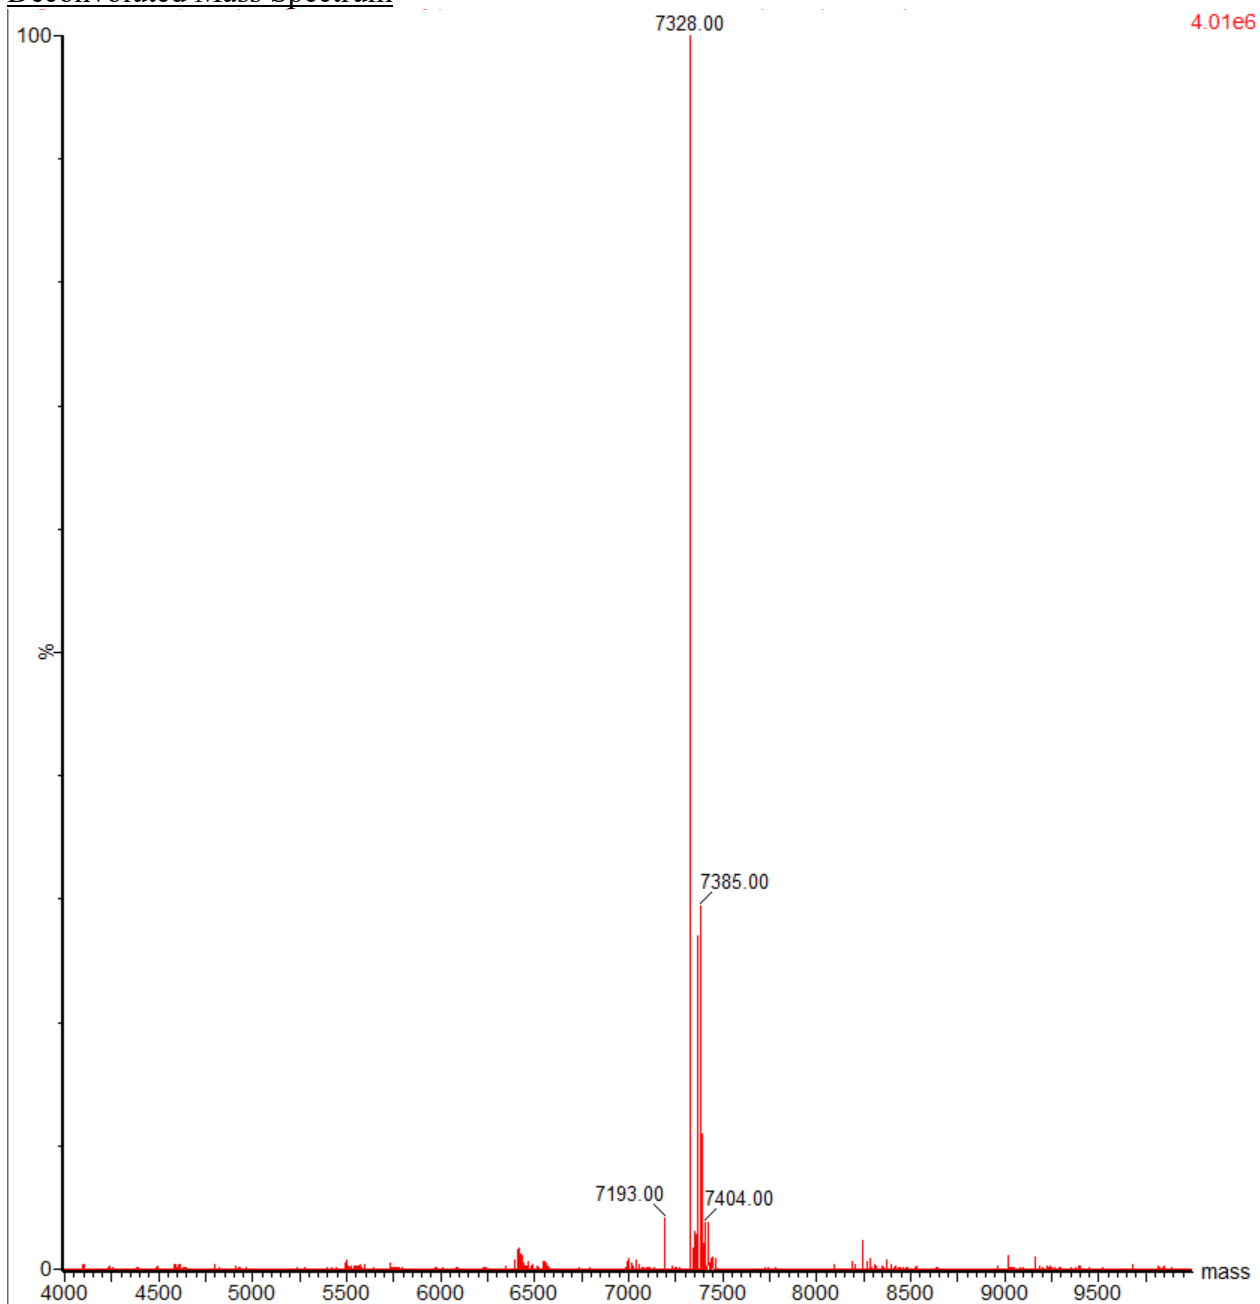

### LCMS Characterization of 3

Produced from **1** by General Procedure **2**:

Yield (A260): 91%

Expected Mass: 7023.61

Expected (M-6)/6 Ion: 1169.60

Found Deconvoluted Mass: 7024.00

Found (M-6)/6 Ion: 1169.61

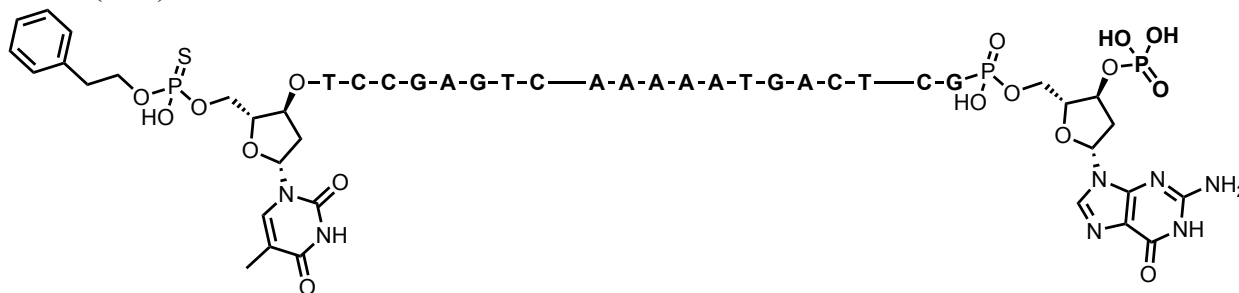

Exact Mass: 7020.14  
Molecular Weight: 7023.61

### A260 Chromatogram

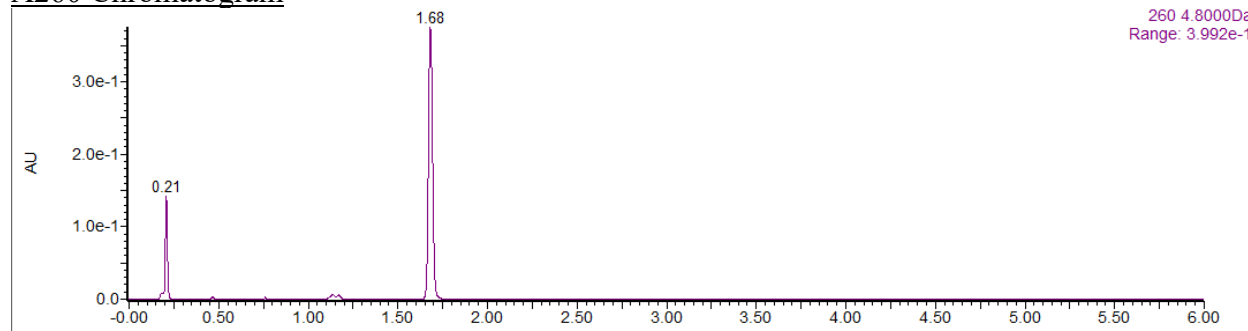

Mass Spectrum (RT= 1.68 min)

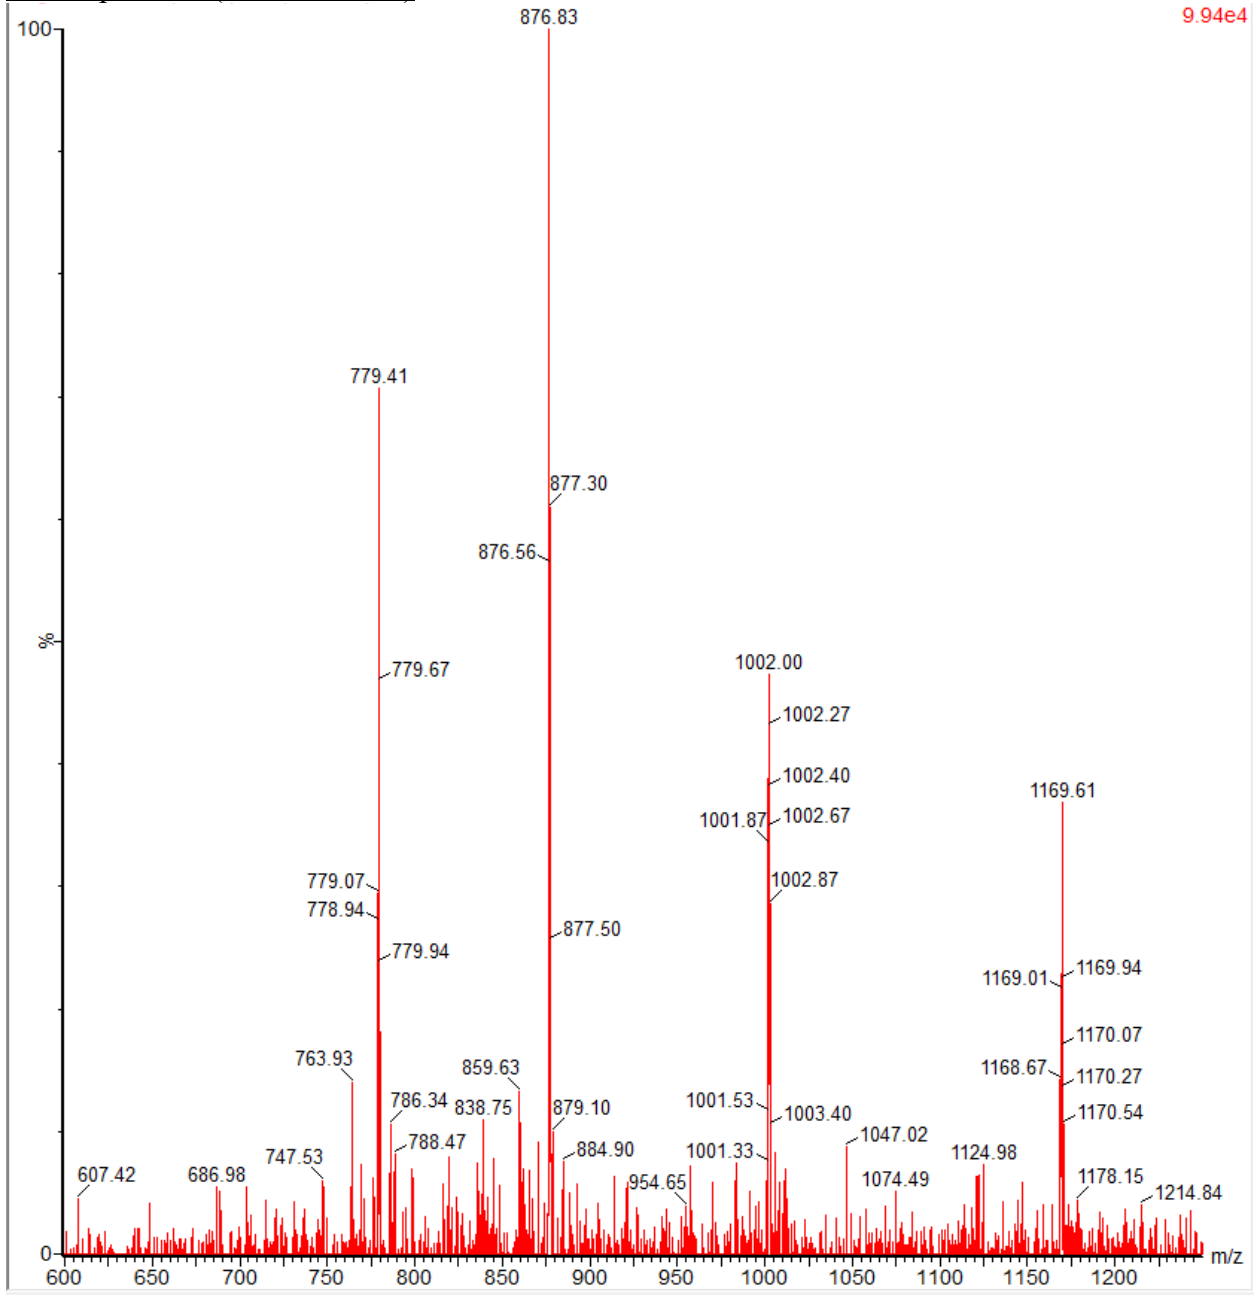

9.94e4

# Deconvoluted Mass Spectrum

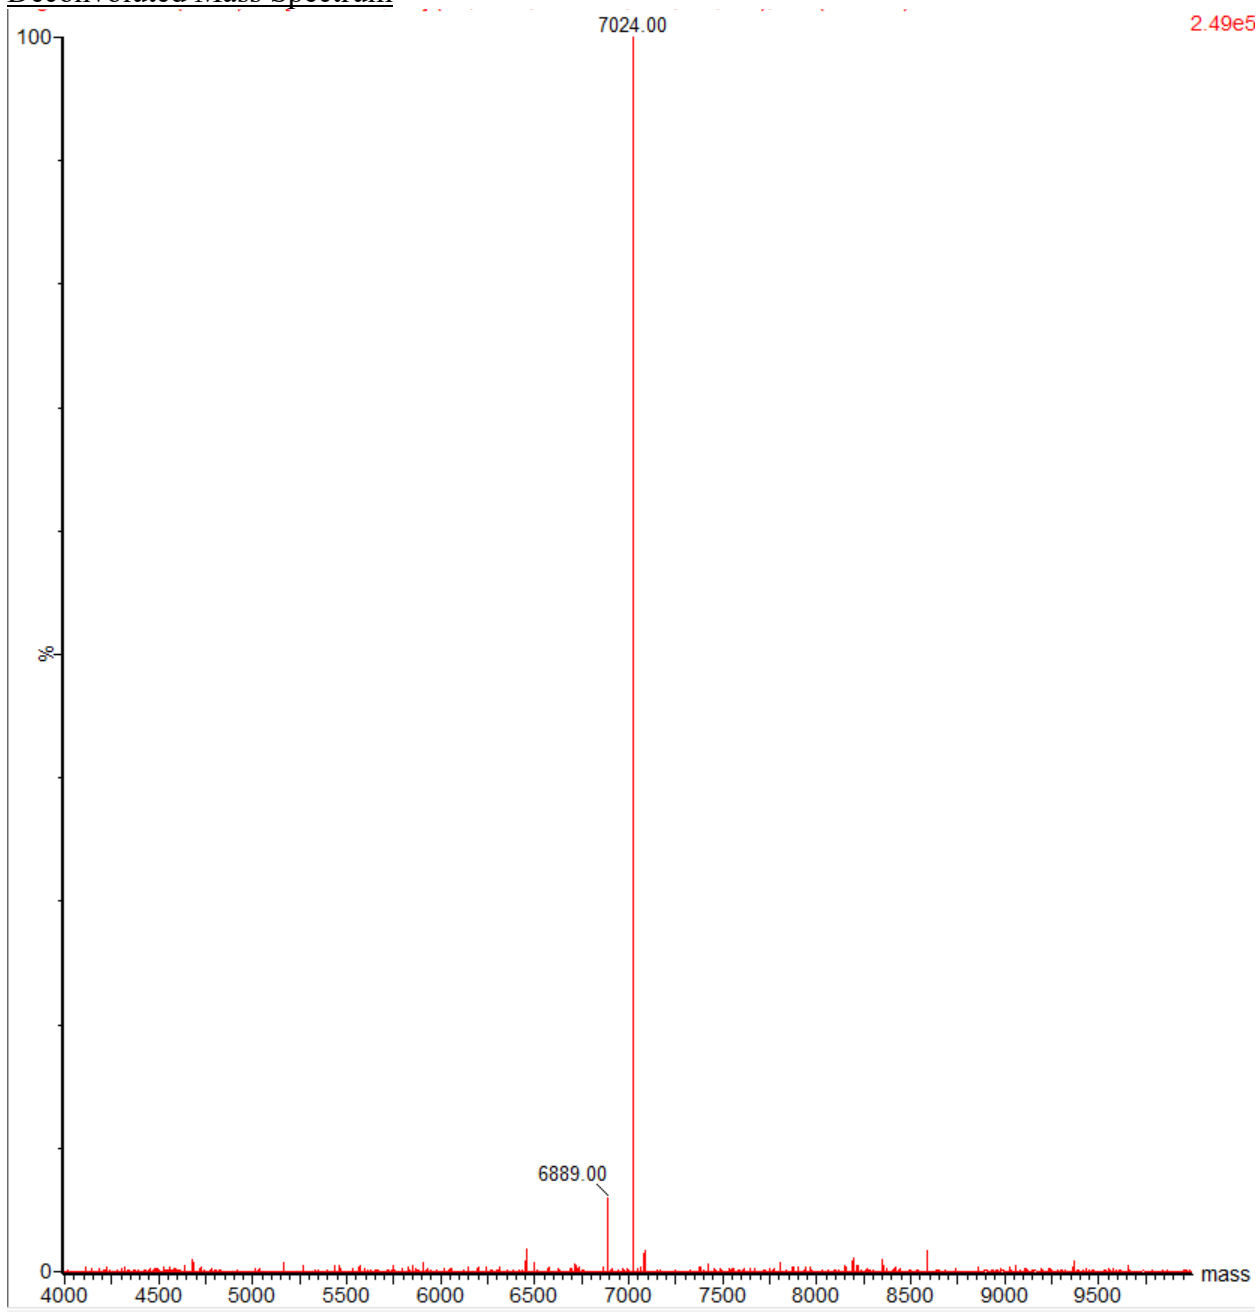

## LCMS Characterization of SI-28

Produced from **SI-3** by General Procedure **2**:

Yield (A260): 73%

Expected Mass: 6719.42

Expected (M-8)/8 Ion: 838.93

Found Deconvoluted Mass: 6720.00

Found (M-8)/8 Ion: 838.95

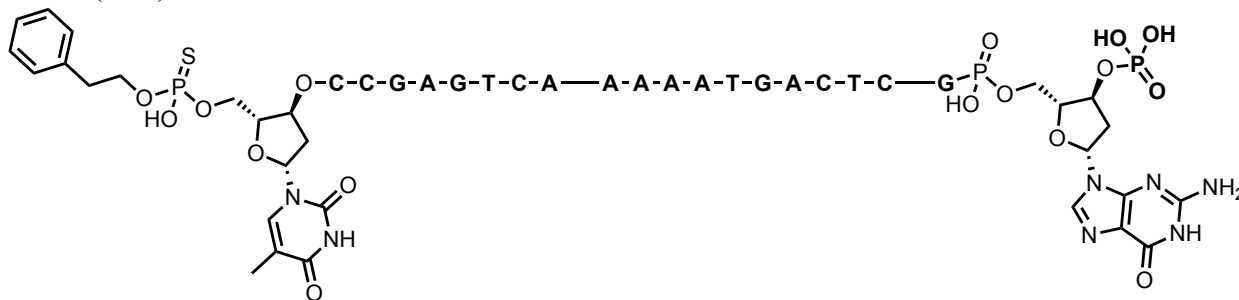

Exact Mass: 6716.10  
Molecular Weight: 6719.42

### A260 Chromatogram

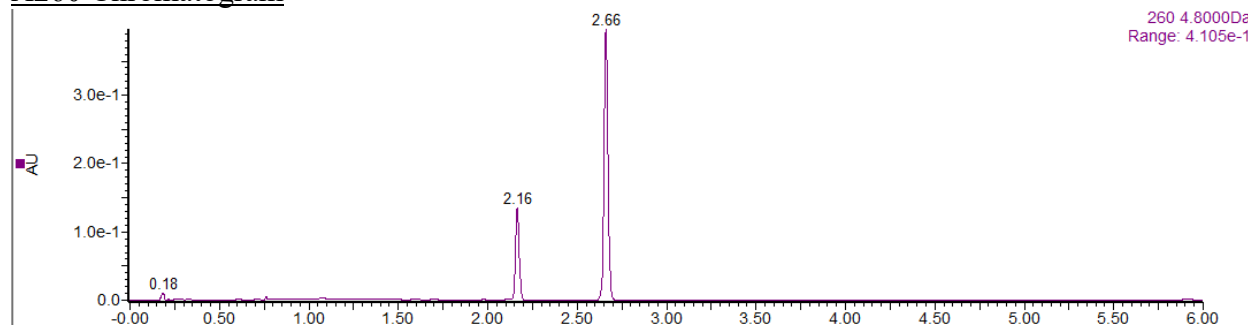

Mass Spectrum (RT= 2.66 min)

3.21e6

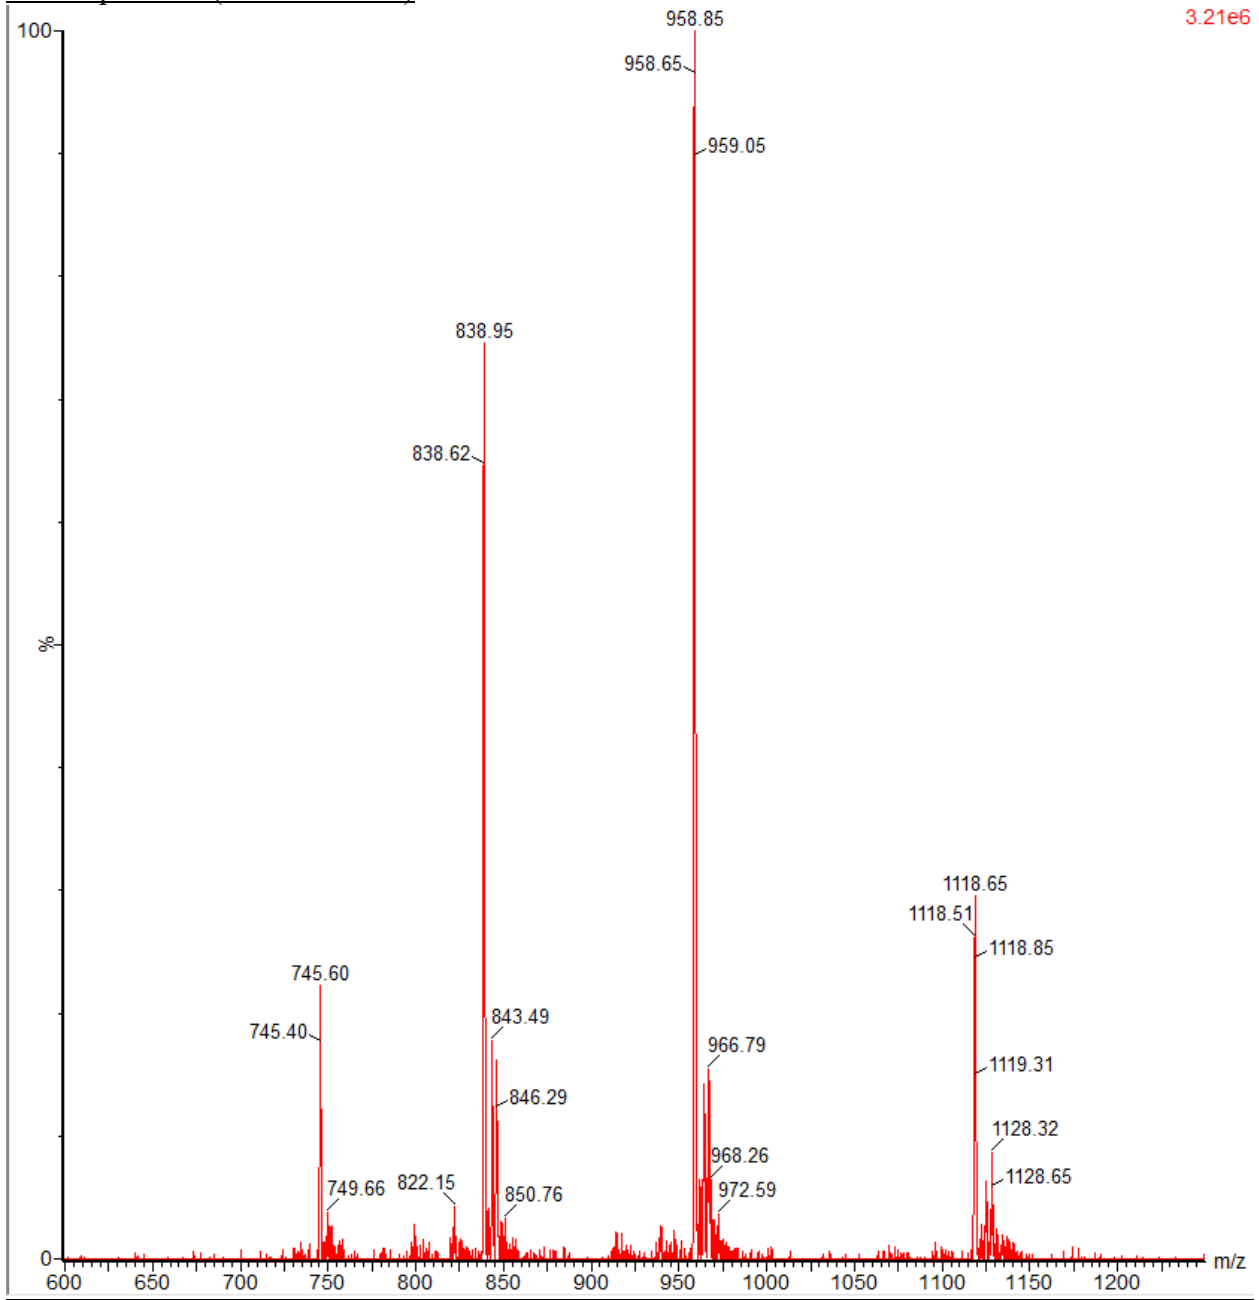

# Deconvoluted Mass Spectrum

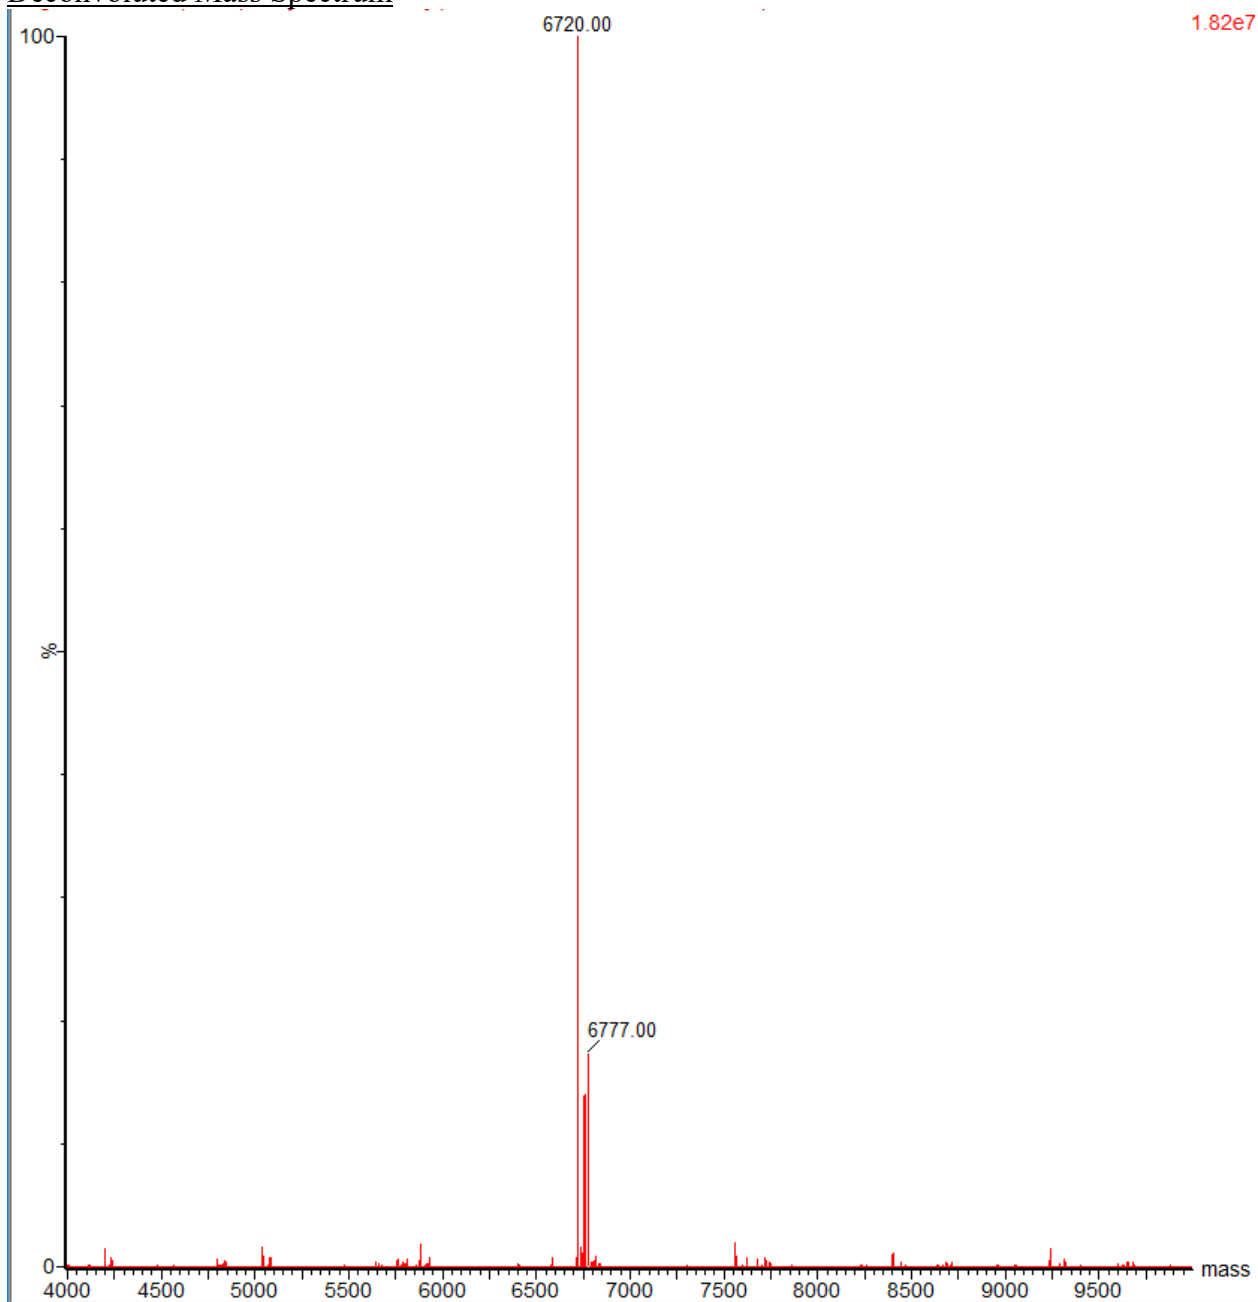



## LCMS Characterization of SI-29

Produced from **SI-4** by General Procedure **2**:

Yield (A260): 76%

Expected Mass: 6732.63

Expected (M-6)/6 Ion: 1171.105

Found Deconvoluted Mass: 6733.00

Found (M-6)/6 Ion: 1171.07

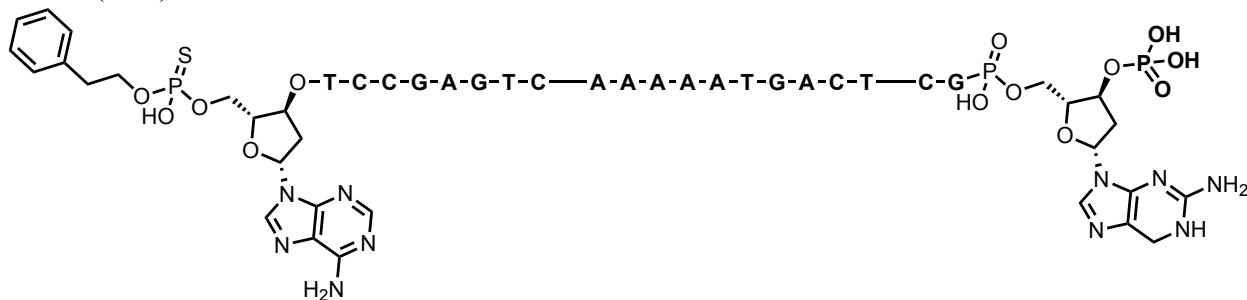

Exact Mass: 7029.16  
Molecular Weight: 7032.63

### A260 Chromatogram

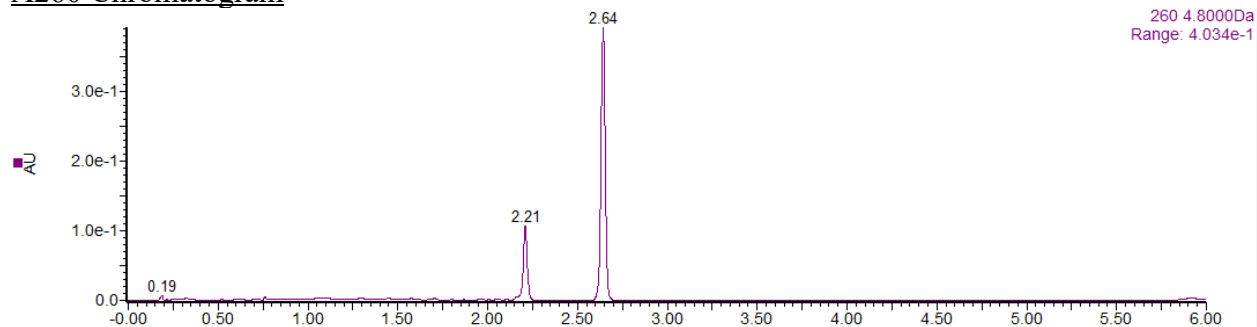

Mass Spectrum (RT= 2.19 min)

2.69e6

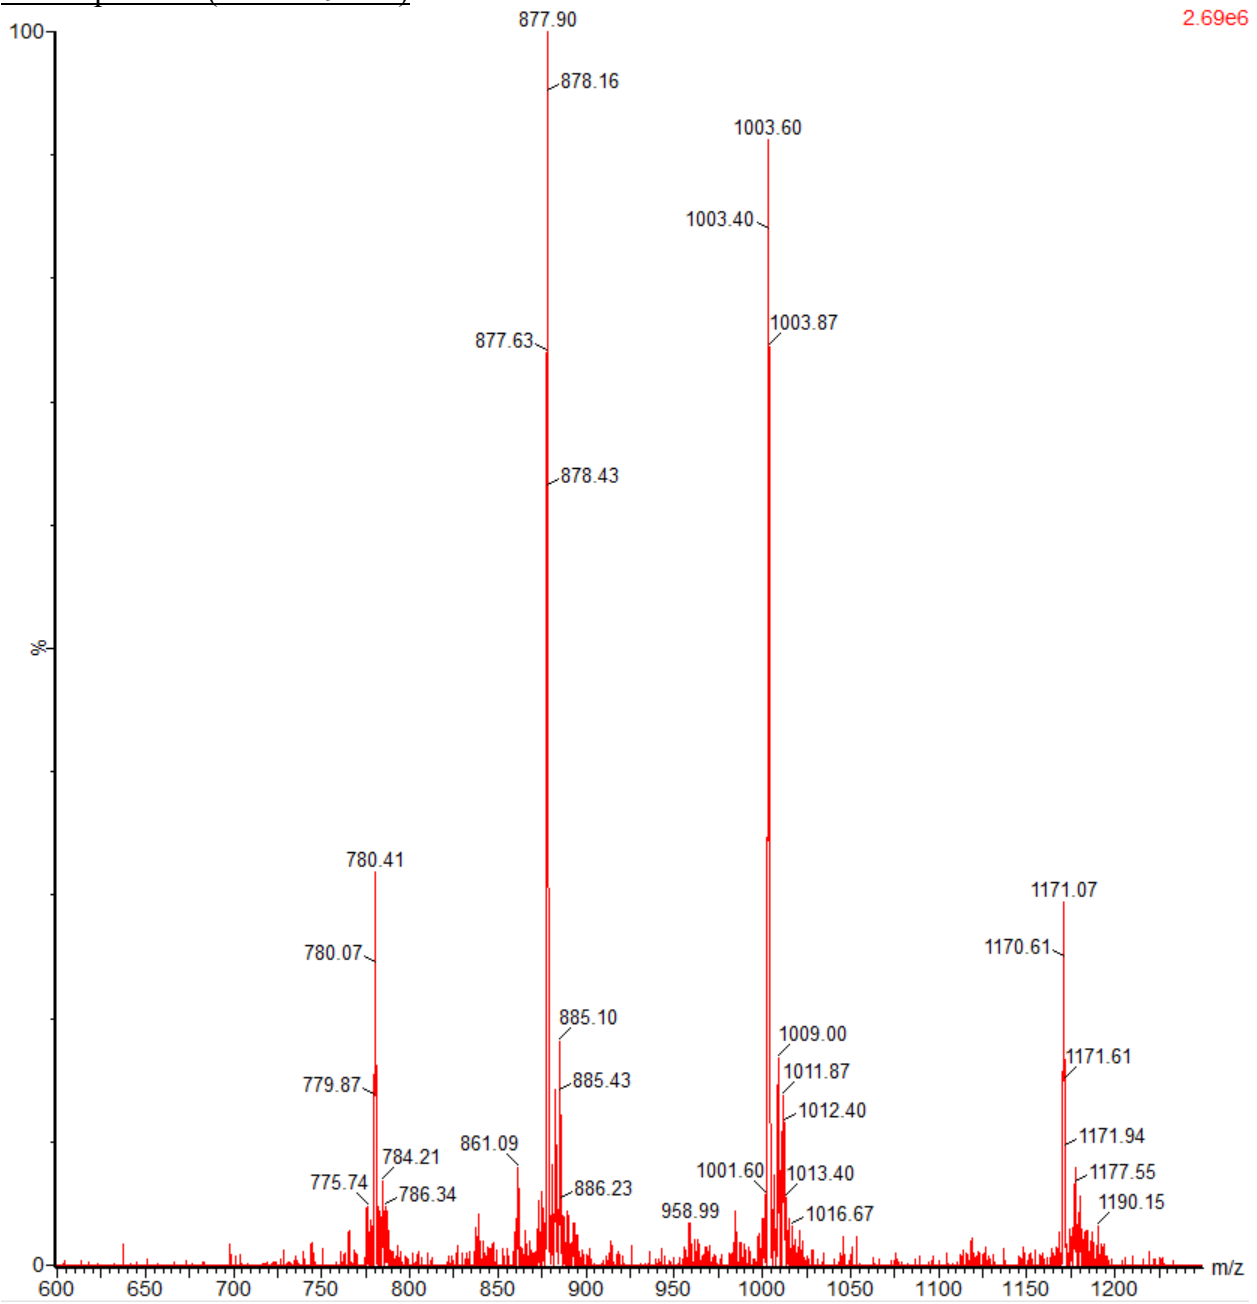

# Deconvoluted Mass Spectrum

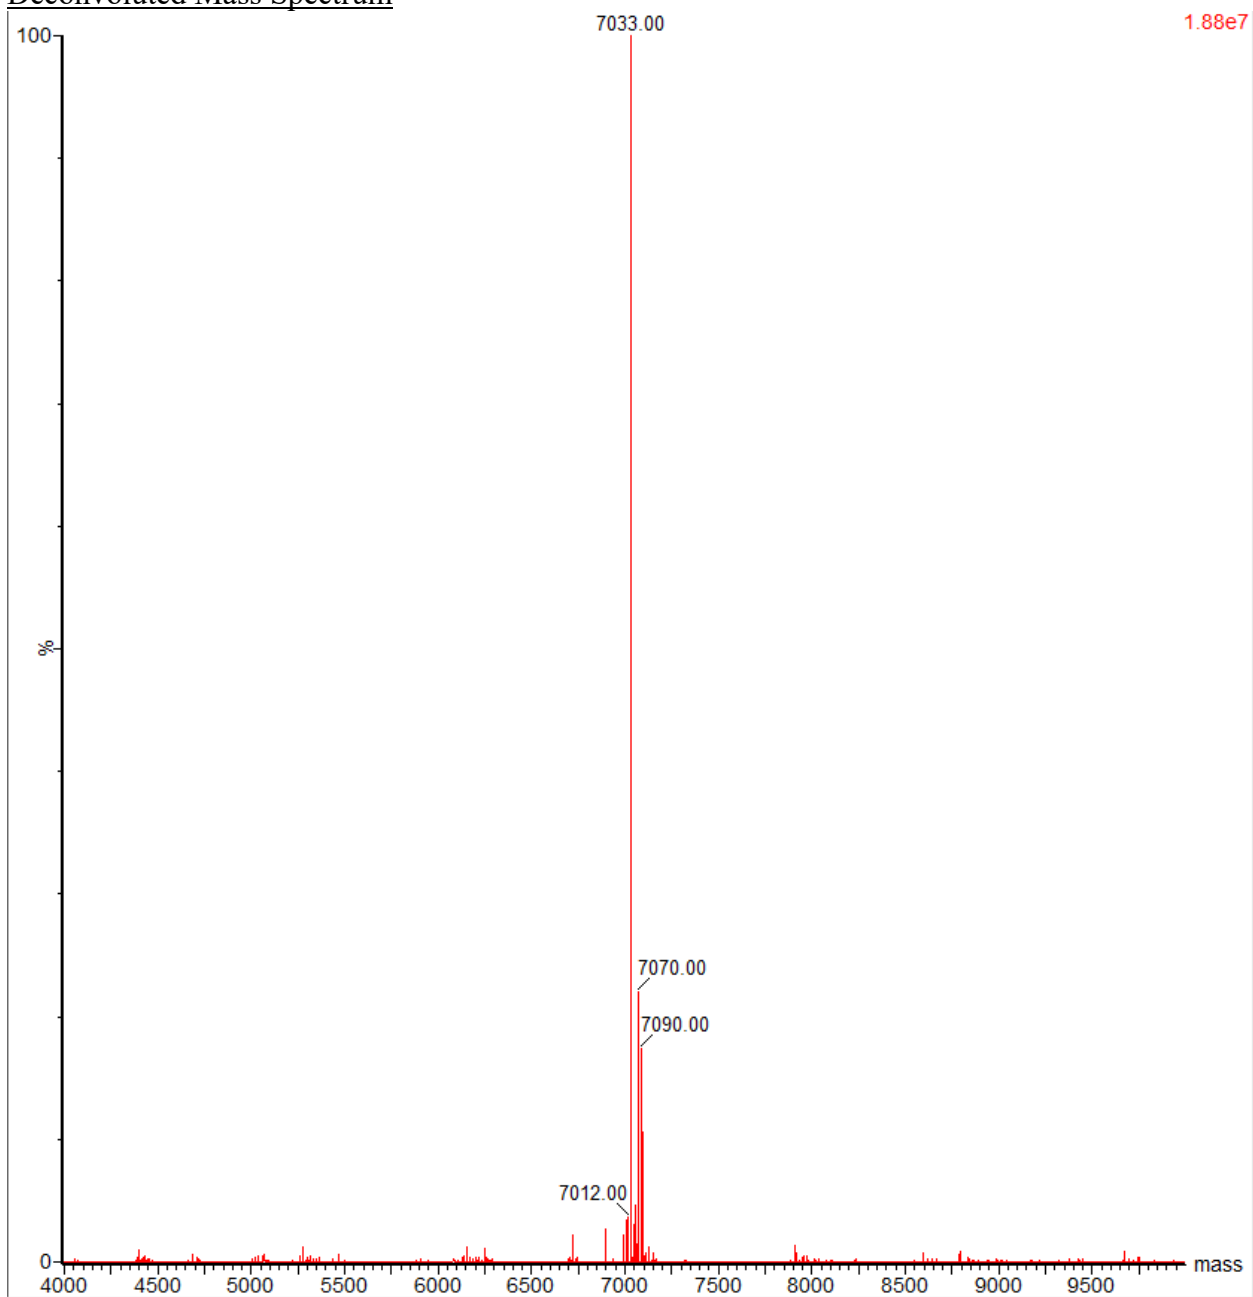

## LCMS Characterization of SI-30

Produced from **SI-5** by General Procedure **2**:

Yield (A260): 66%

Expected Mass: 7008.6

Expected (M-6)/6 Ion: 1167.1

Found Deconvoluted Mass: 7008.00

Found (M-6)/6 Ion: 1166.7

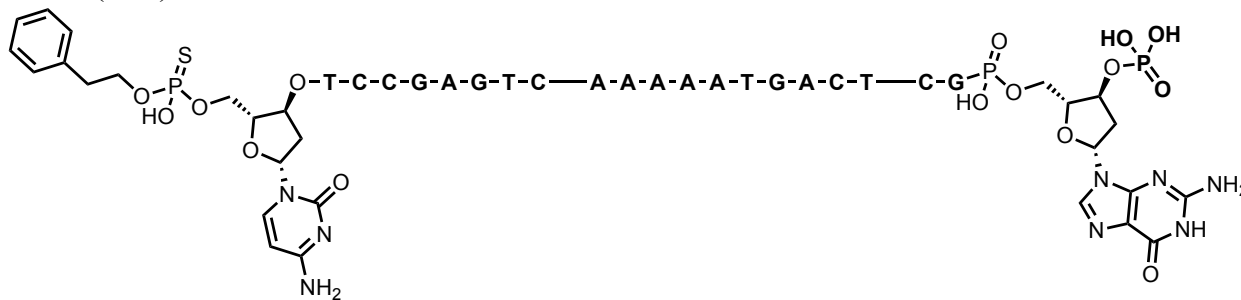

Exact Mass: 7005.14  
Molecular Weight: 7008.60

### A260 Chromatogram

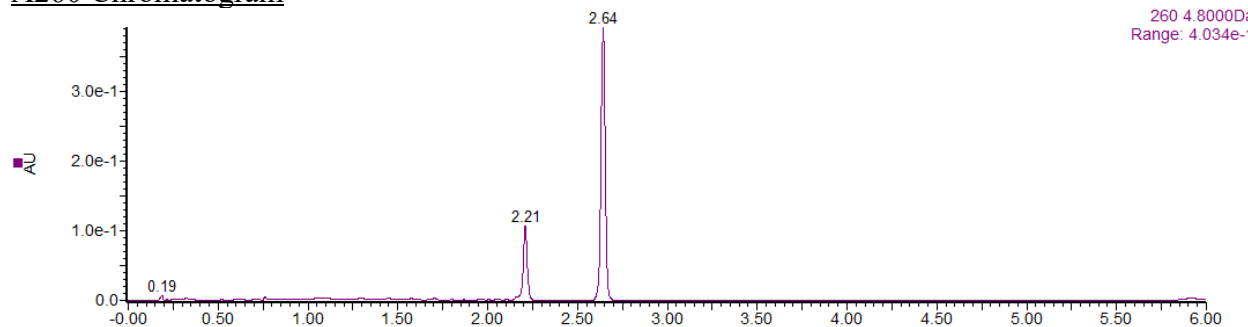

Mass Spectrum (RT= 2.64 min)

9.48e5

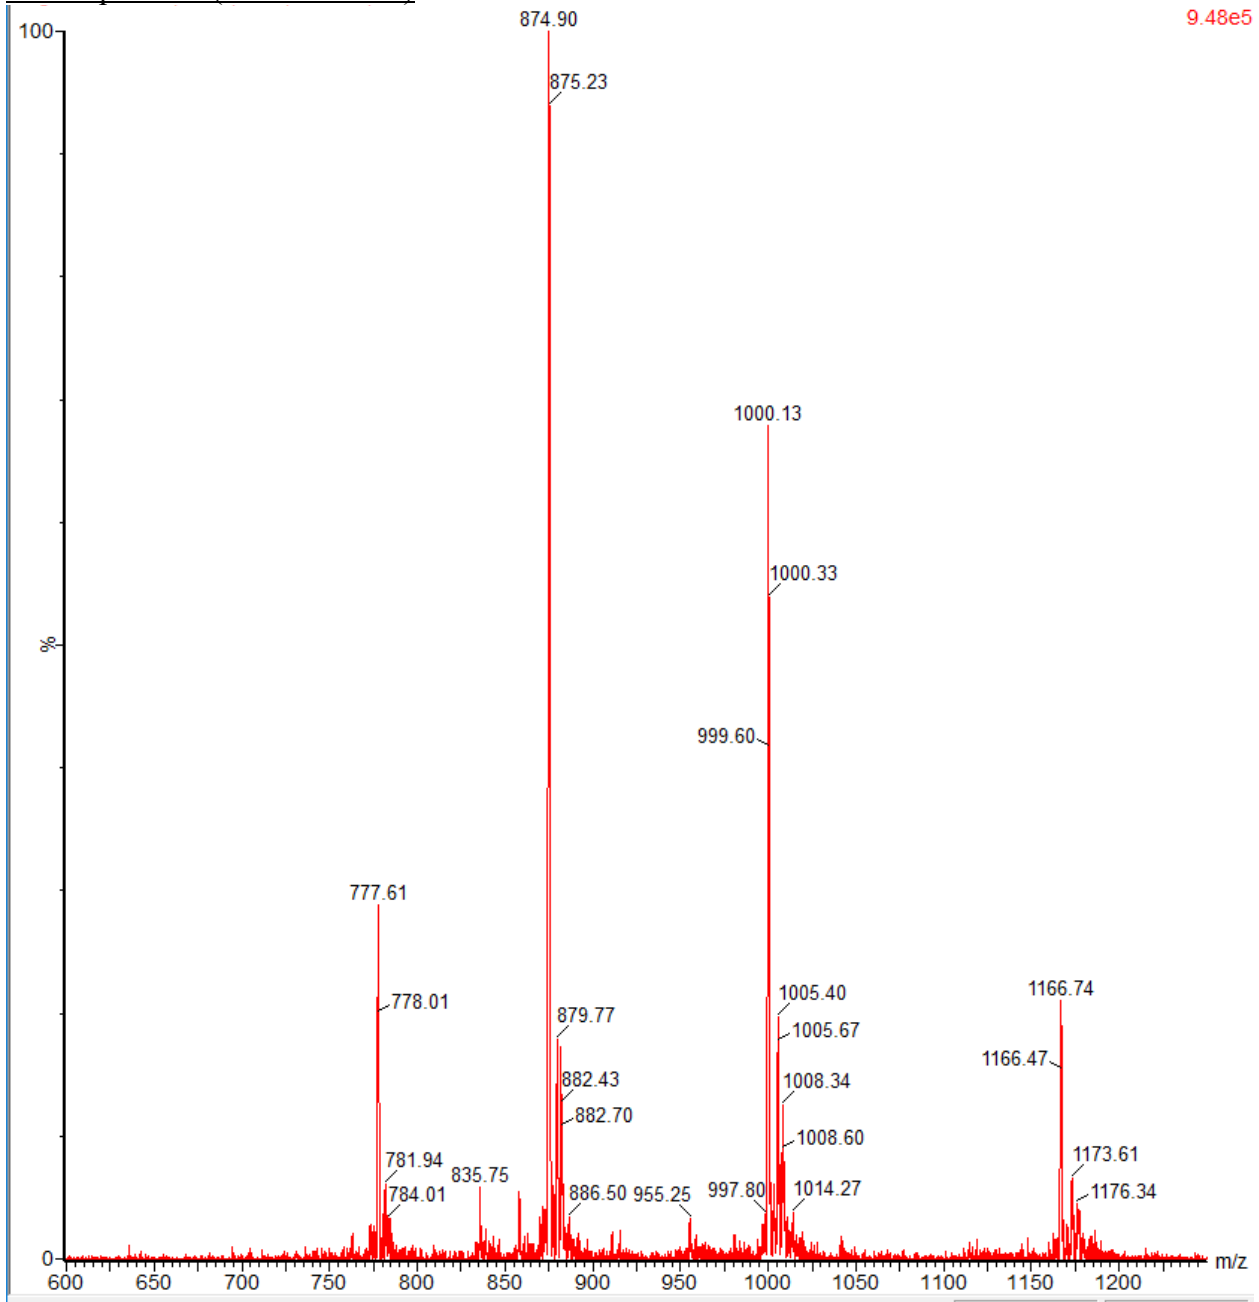

# Deconvoluted Mass Spectrum

4.07e6

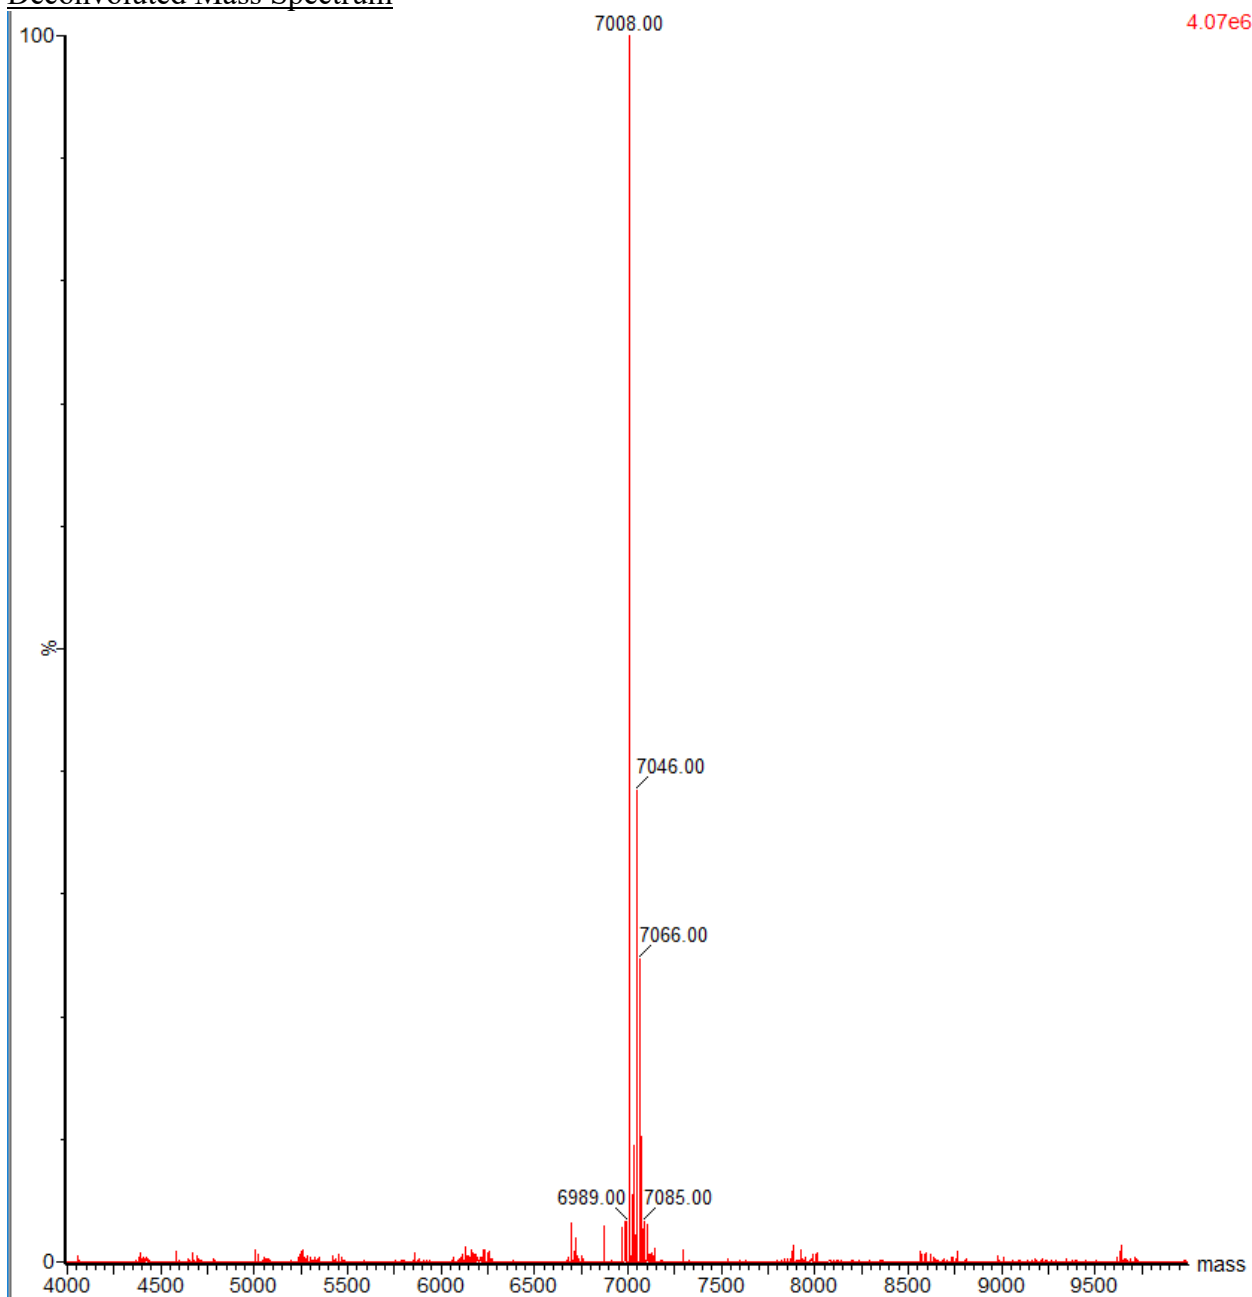

## LCMS Characterization of SI-31

Produced from **SI-6** by General Procedure **2**:

Yield (A260): 76%

Expected Mass: 7048.63

Expected (M-6)/6 Ion: 1173.77

Found Deconvoluted Mass: 7049.00

Found (M-6)/6 Ion: 1173.61

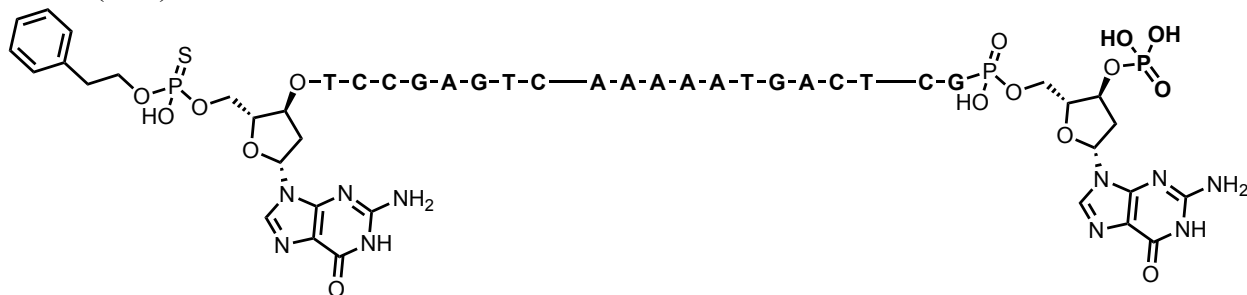

Exact Mass: 7045.15  
Molecular Weight: 7048.63

### A260 Chromatogram

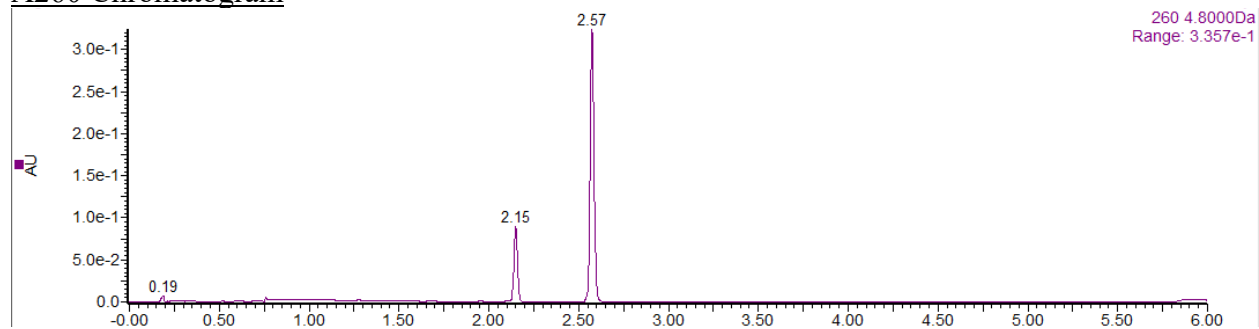

Mass Spectrum (RT= 2.57 min)

6.81e5

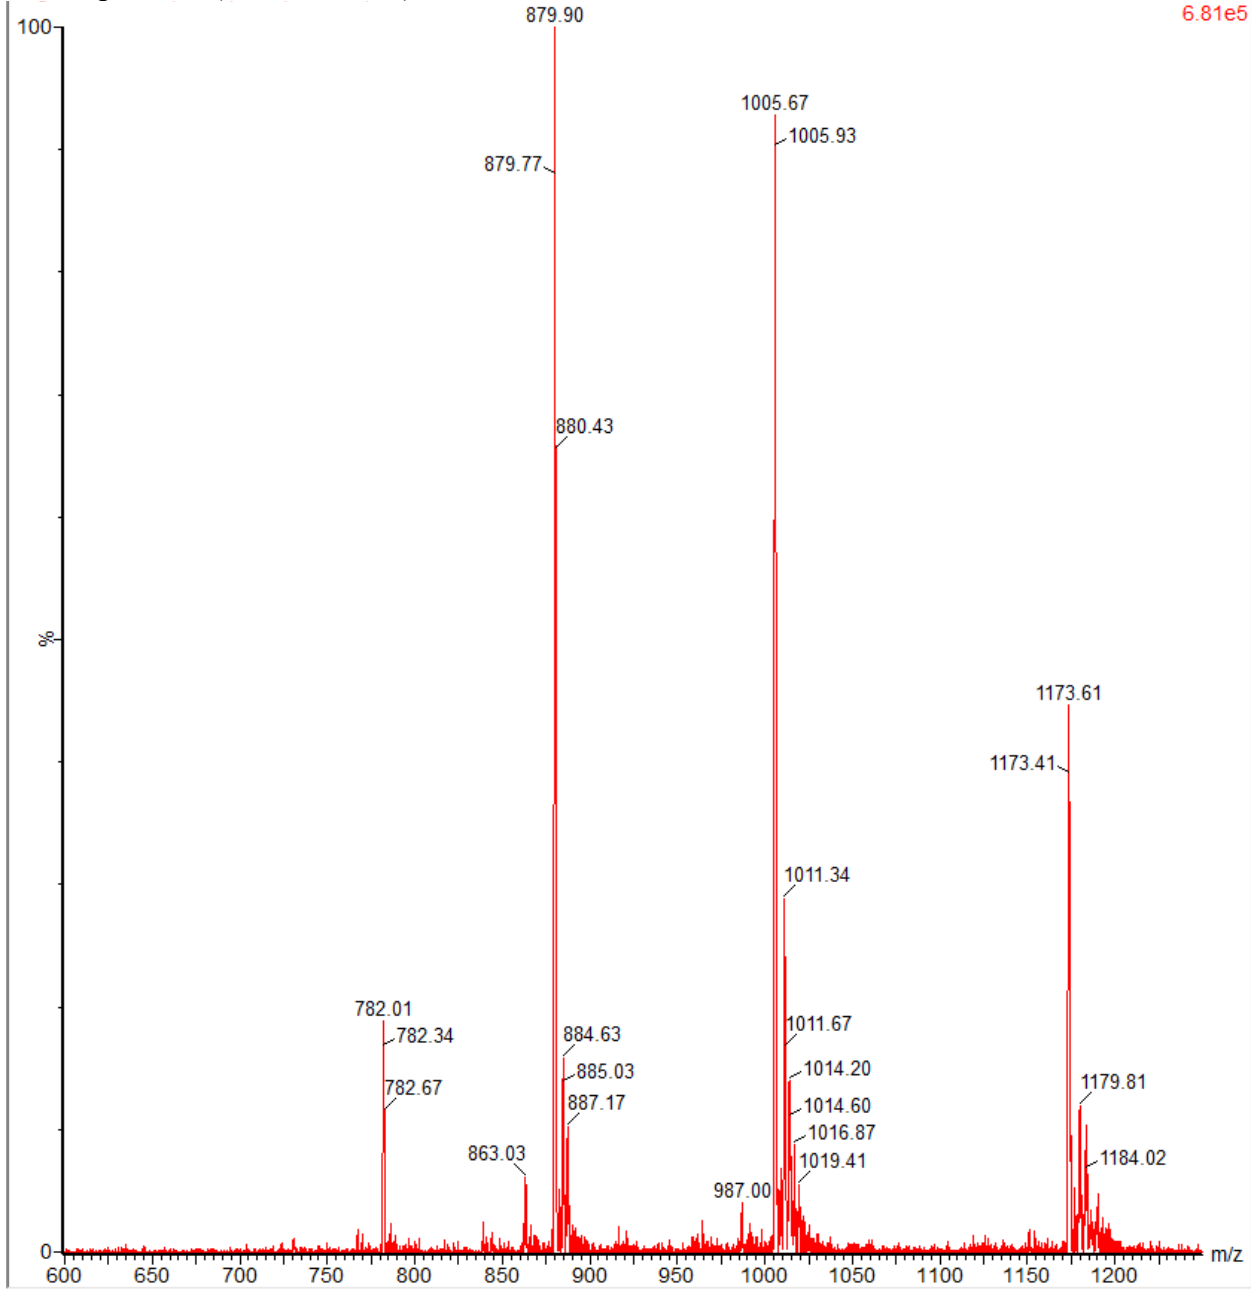



# Deconvoluted Mass Spectrum

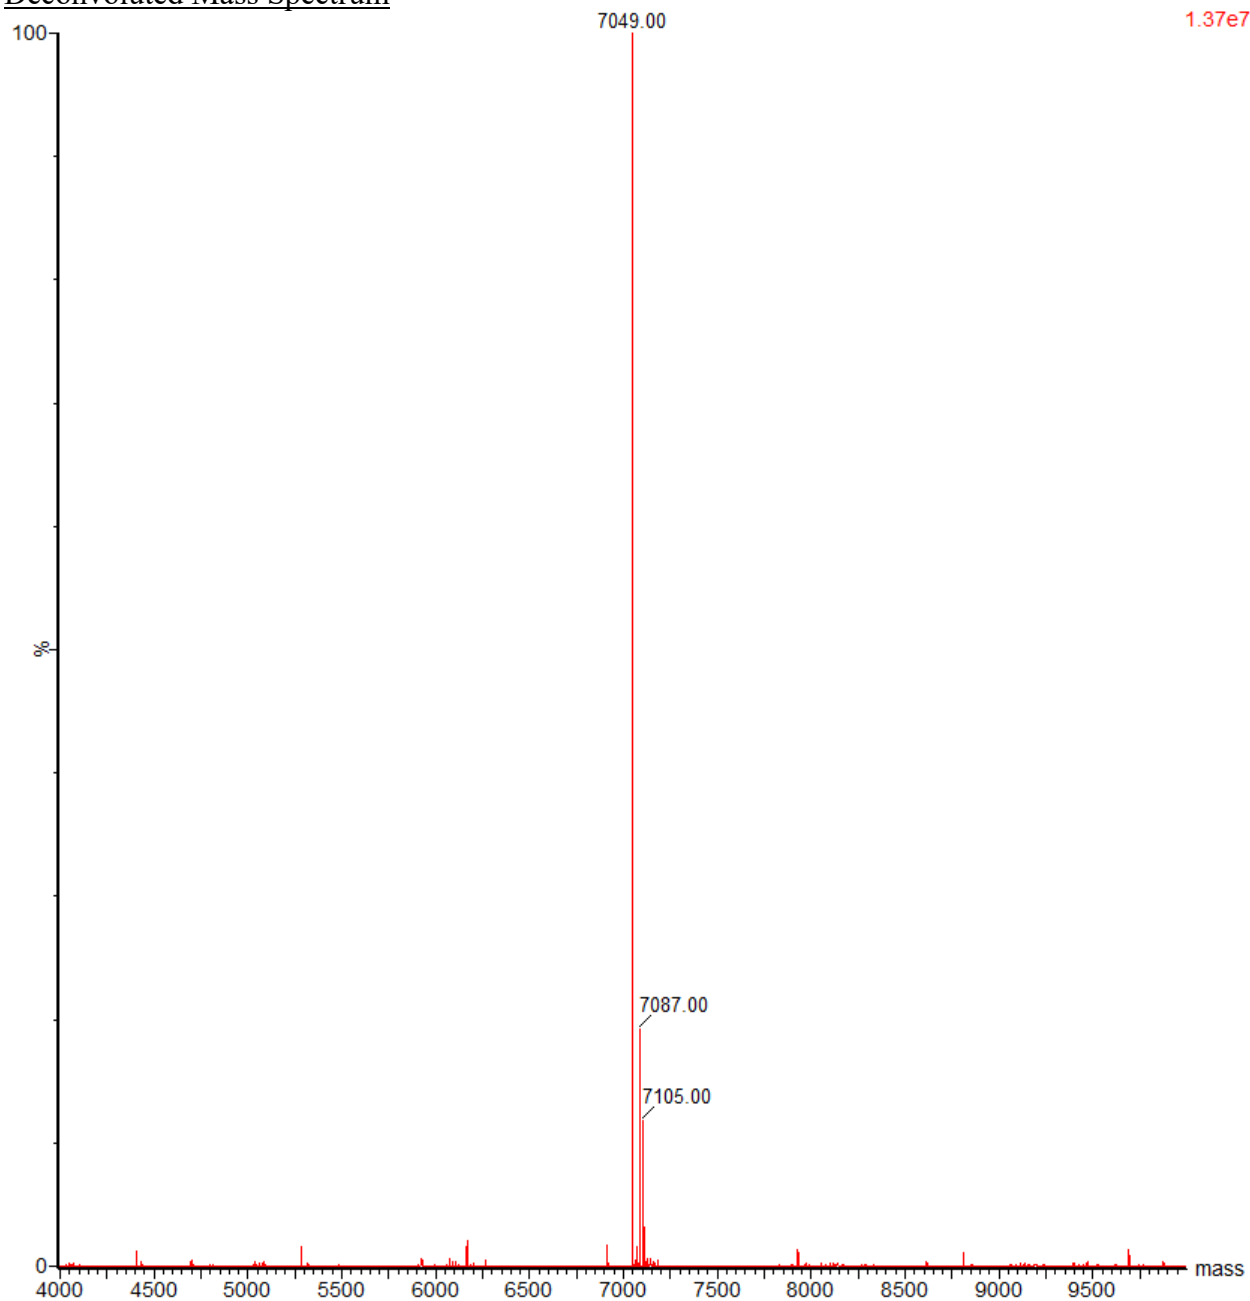

## LCMS Characterization of SI-32

Produced from SI-7 by General Procedure 2:

Yield (A260): 61%

Expected Mass: 6415.22

Expected (M-6)/6 Ion: 1068.20

Found Deconvoluted Mass: 6145.00

Found (M-6)/6 Ion: 1067.82

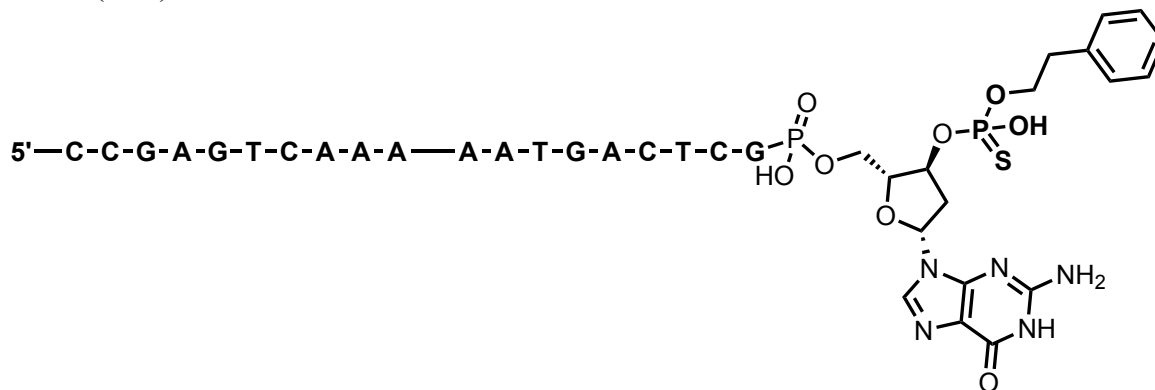

Exact Mass: 6412.05  
Molecular Weight: 6415.22

### A260 Chromatogram

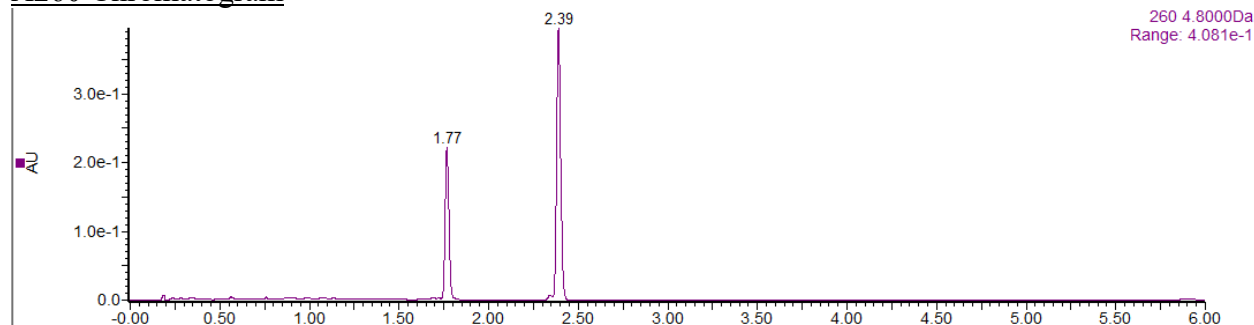

Mass Spectrum (RT= 2.18 min)

1.43e6

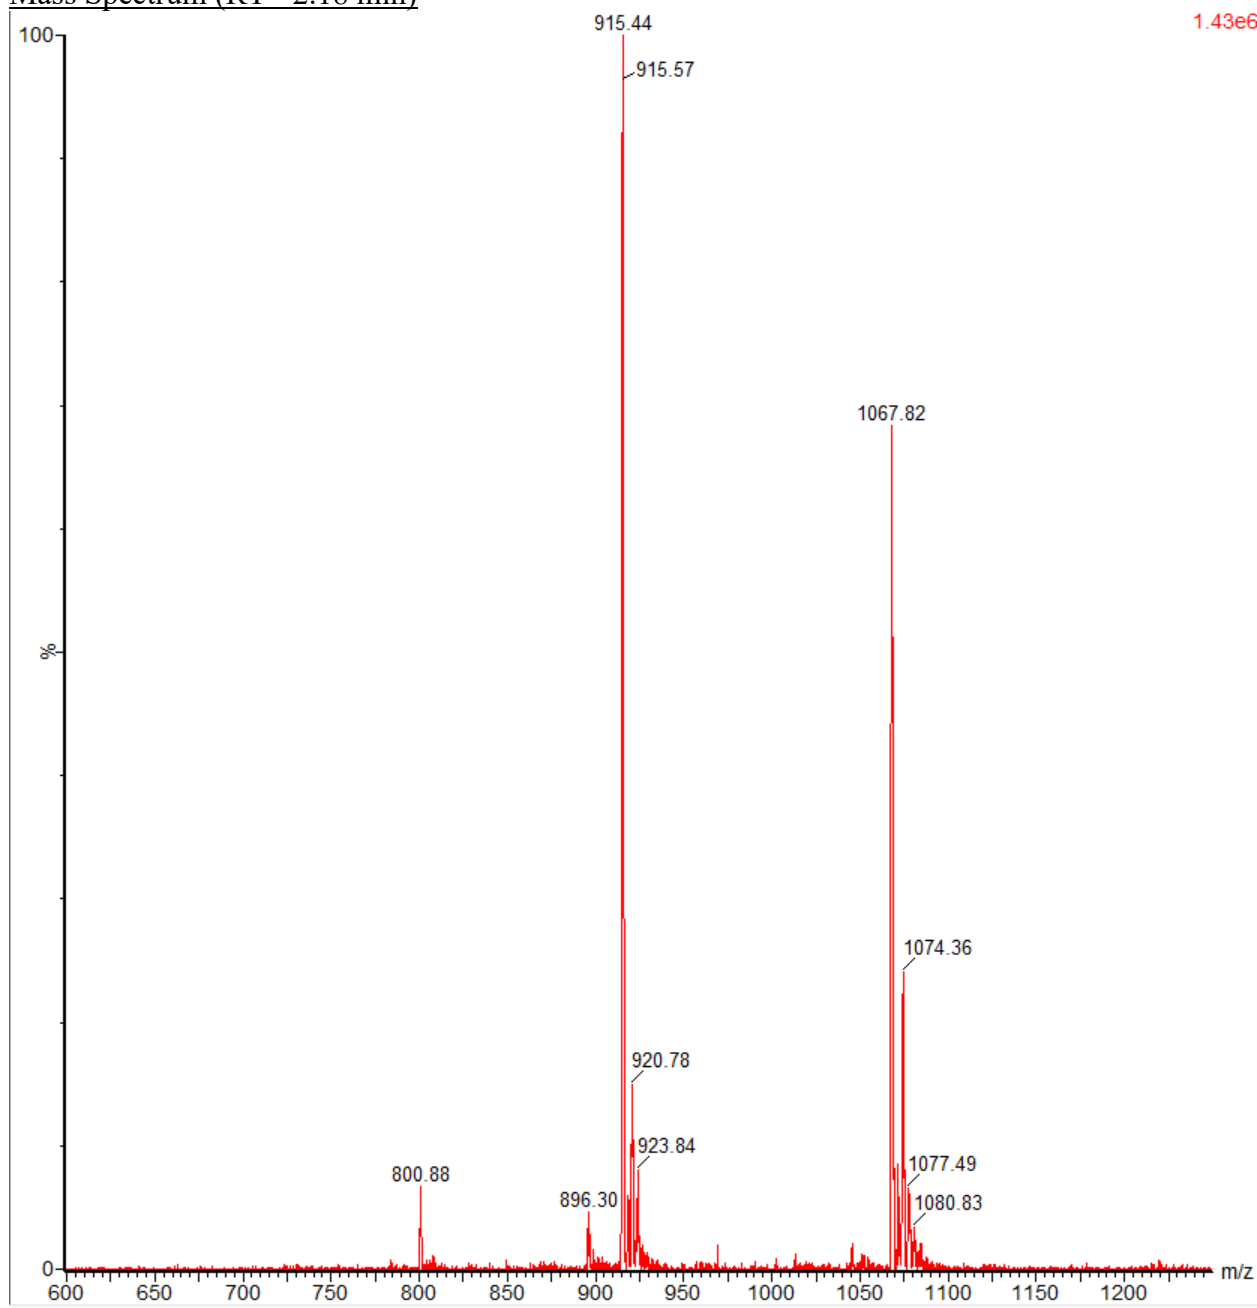

# Deconvoluted Mass Spectrum

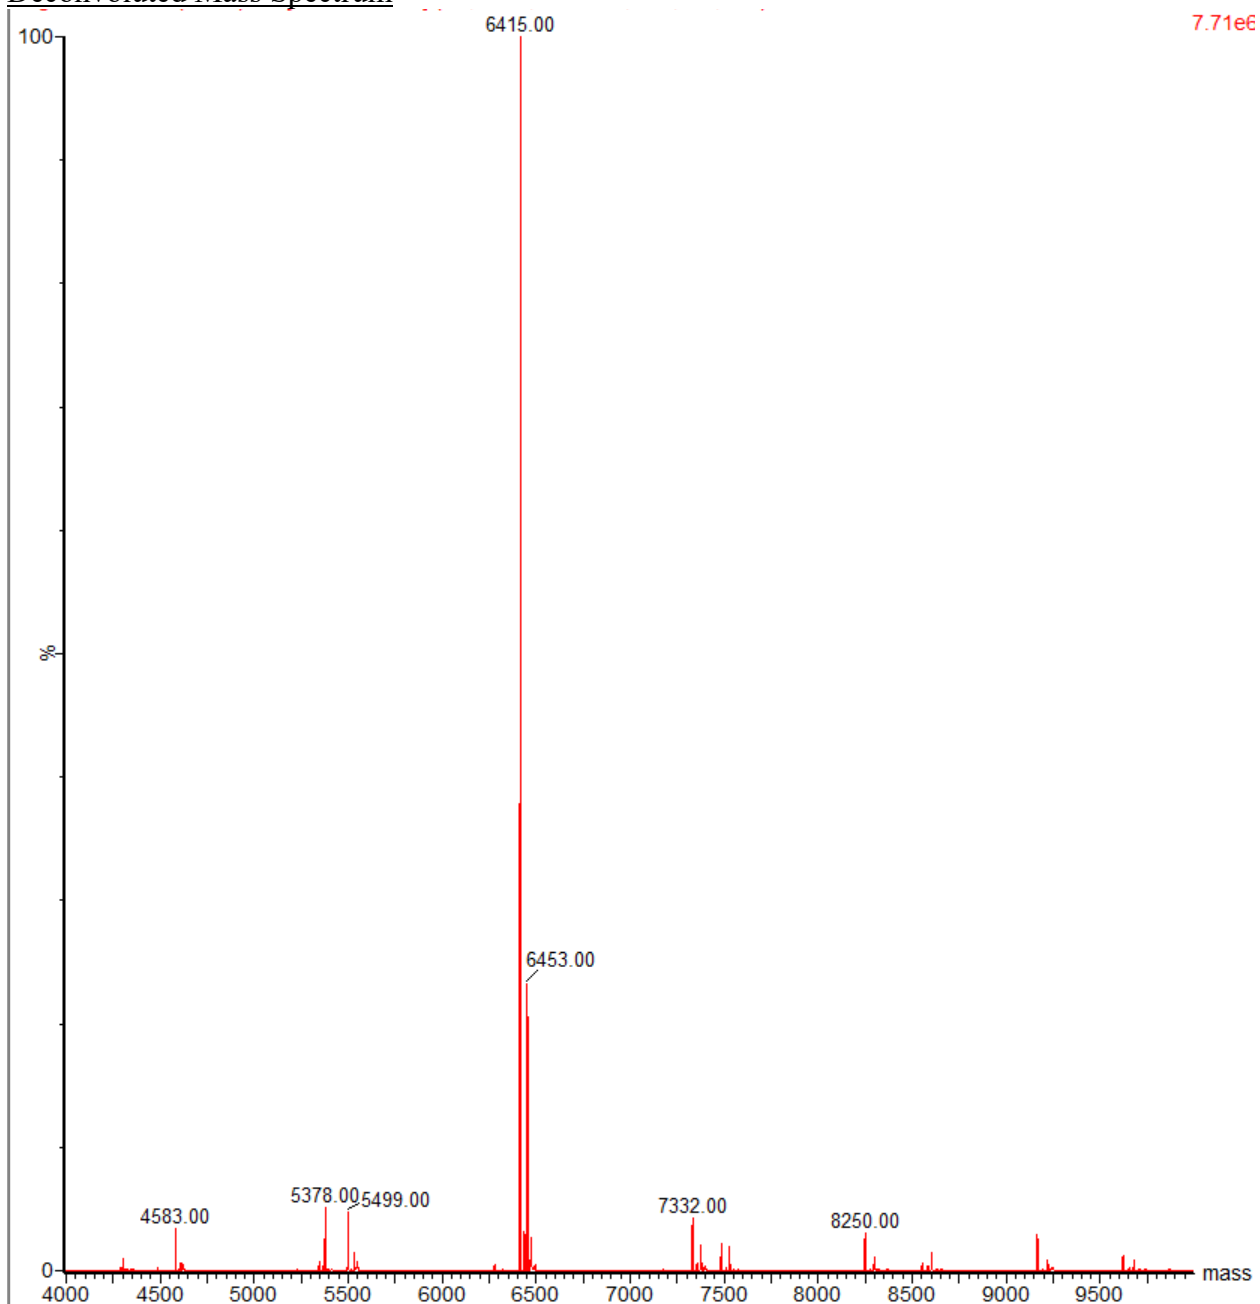

### LCMS Characterization of SI-33

Produced from **SI-8** by General Procedure **2**:

Yield (A260): 73%

Expected Mass: 6719.42

Expected (M-6)/6 Ion: 1118.9

Found Deconvoluted Mass: 6719.00

Found (M-6)/6 Ion: 1118.45

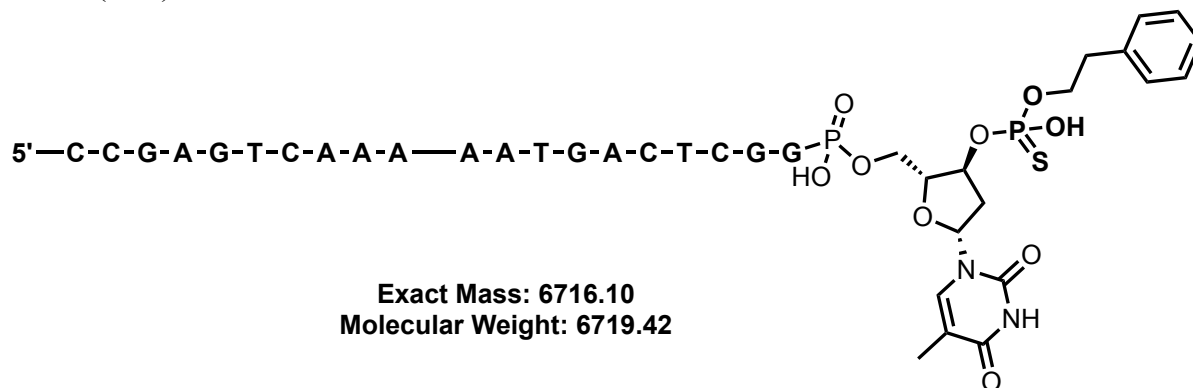

### A260 Chromatogram

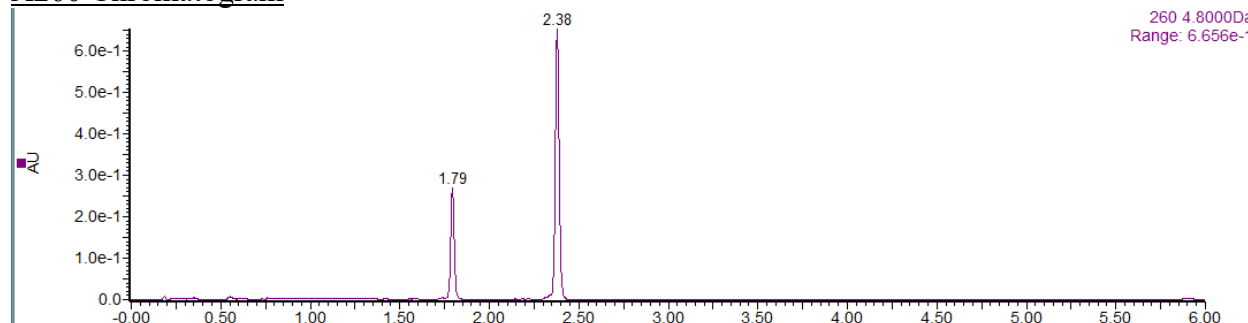

Mass Spectrum (RT= 2.19 min)

7.23e6

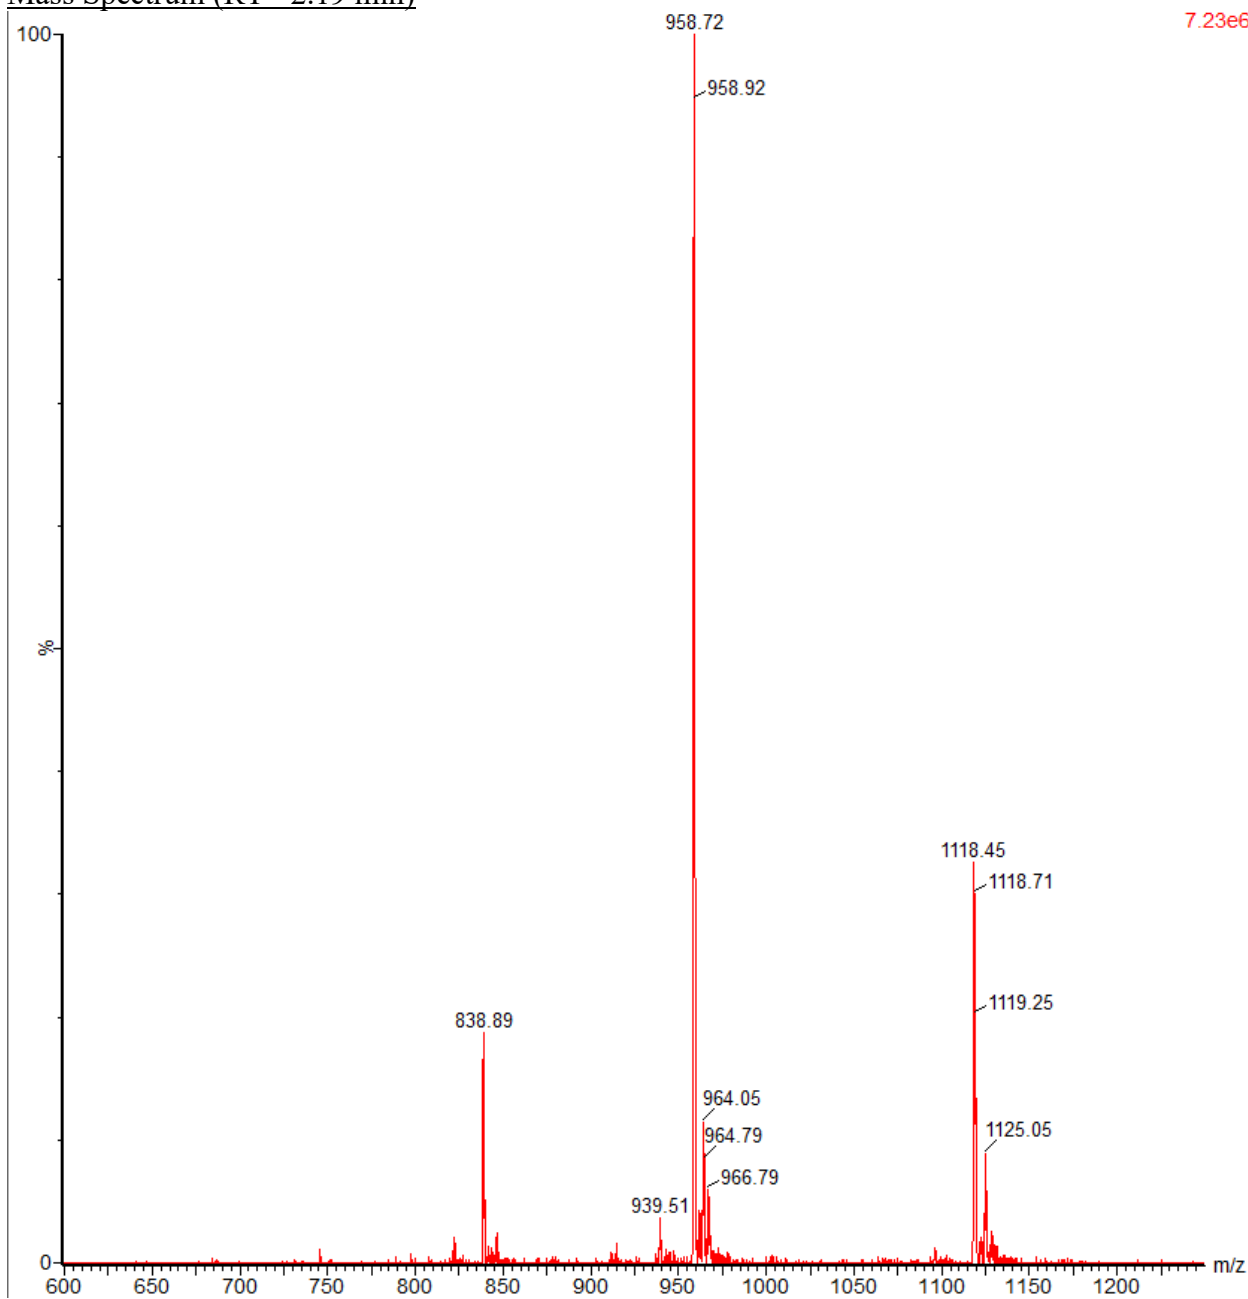

# Deconvoluted Mass Spectrum

7.50e6

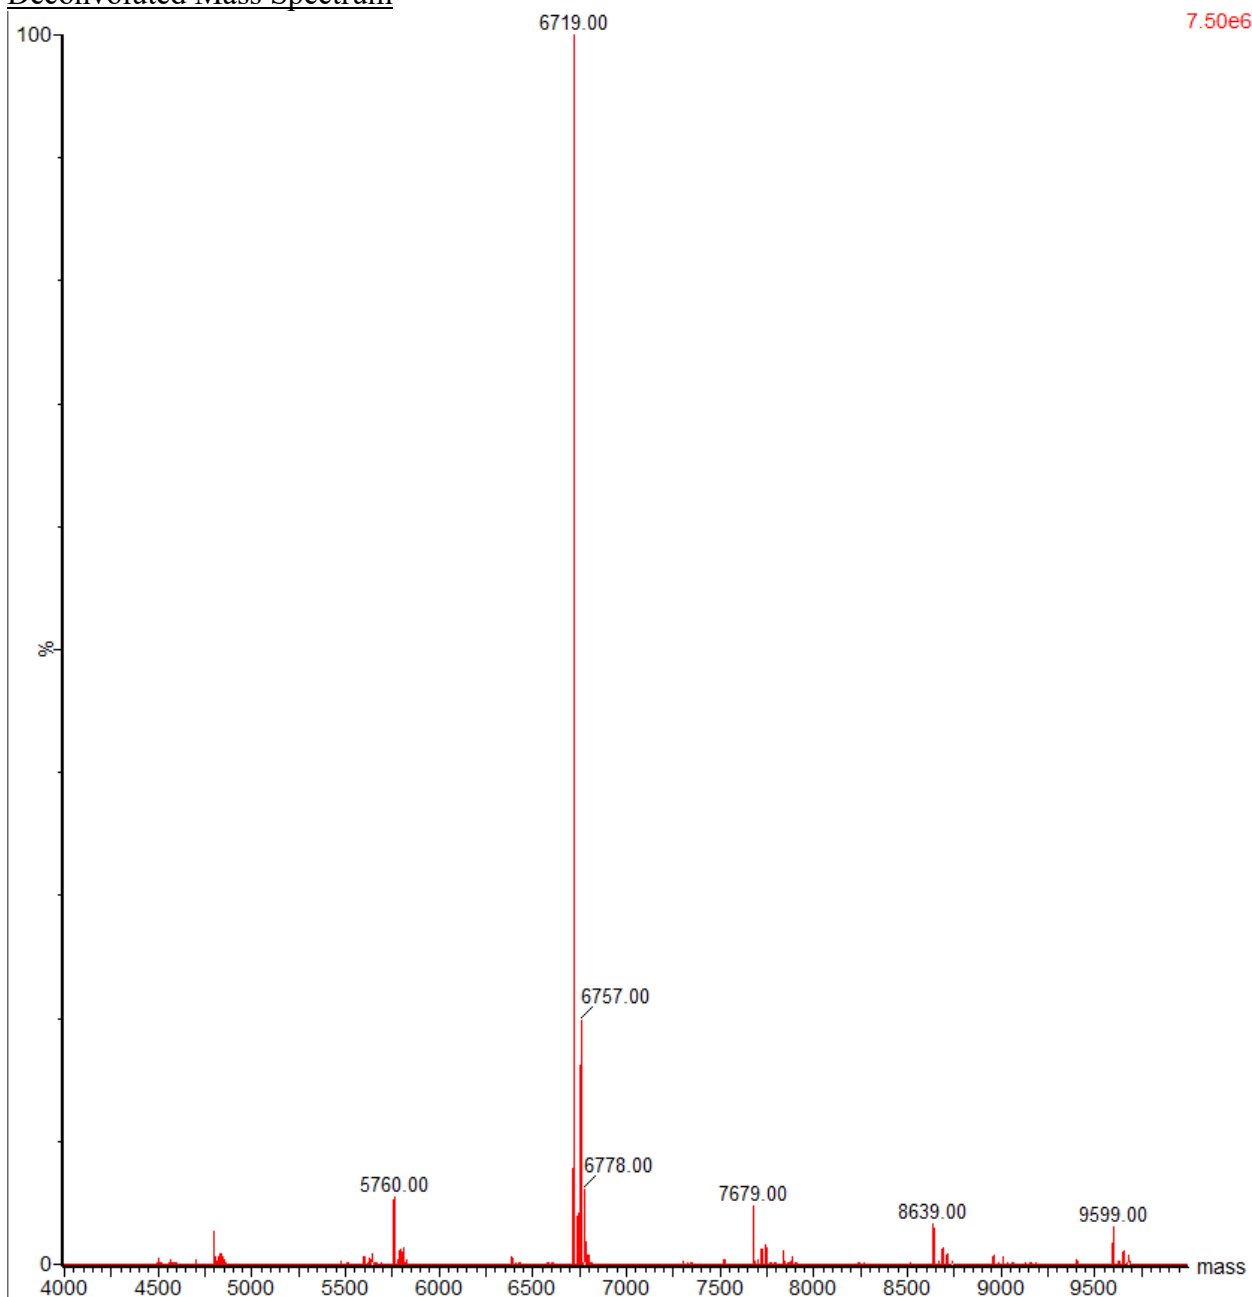

## LCMS Characterization of 4

Produced from **2** by General Procedure **1**:

Yield (A260): 72%

Expected Mass: 7023.61

Expected (M-6)/6 Ion: 1169.6

Found Deconvoluted Mass: 7023.00

Found (M-6)/6 Ion: 1169.54

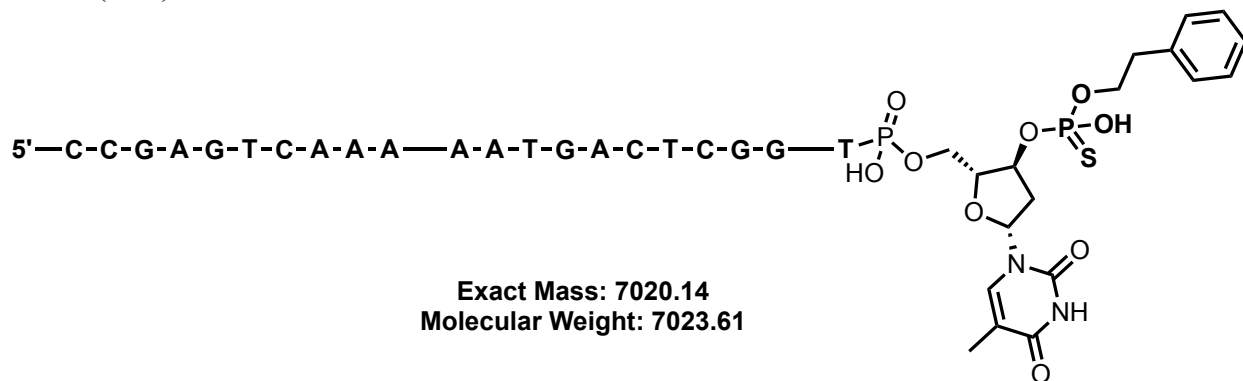

## A260 Chromatogram

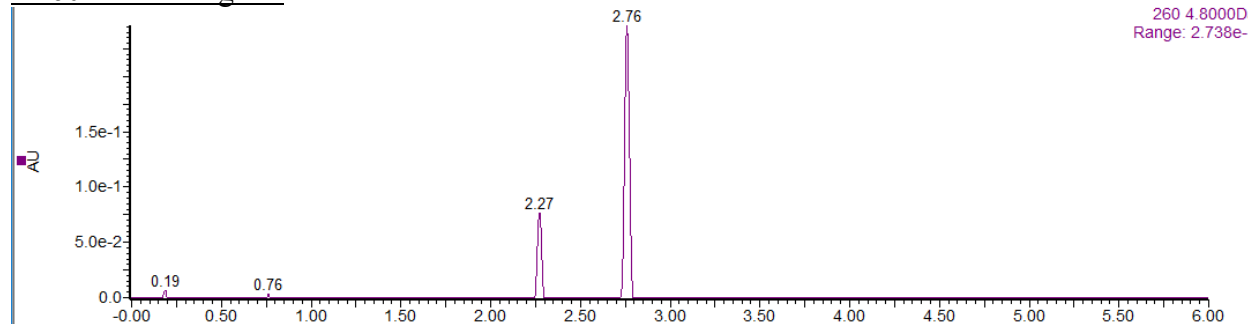



Mass Spectrum (RT= 2.76 min)

2.38e6

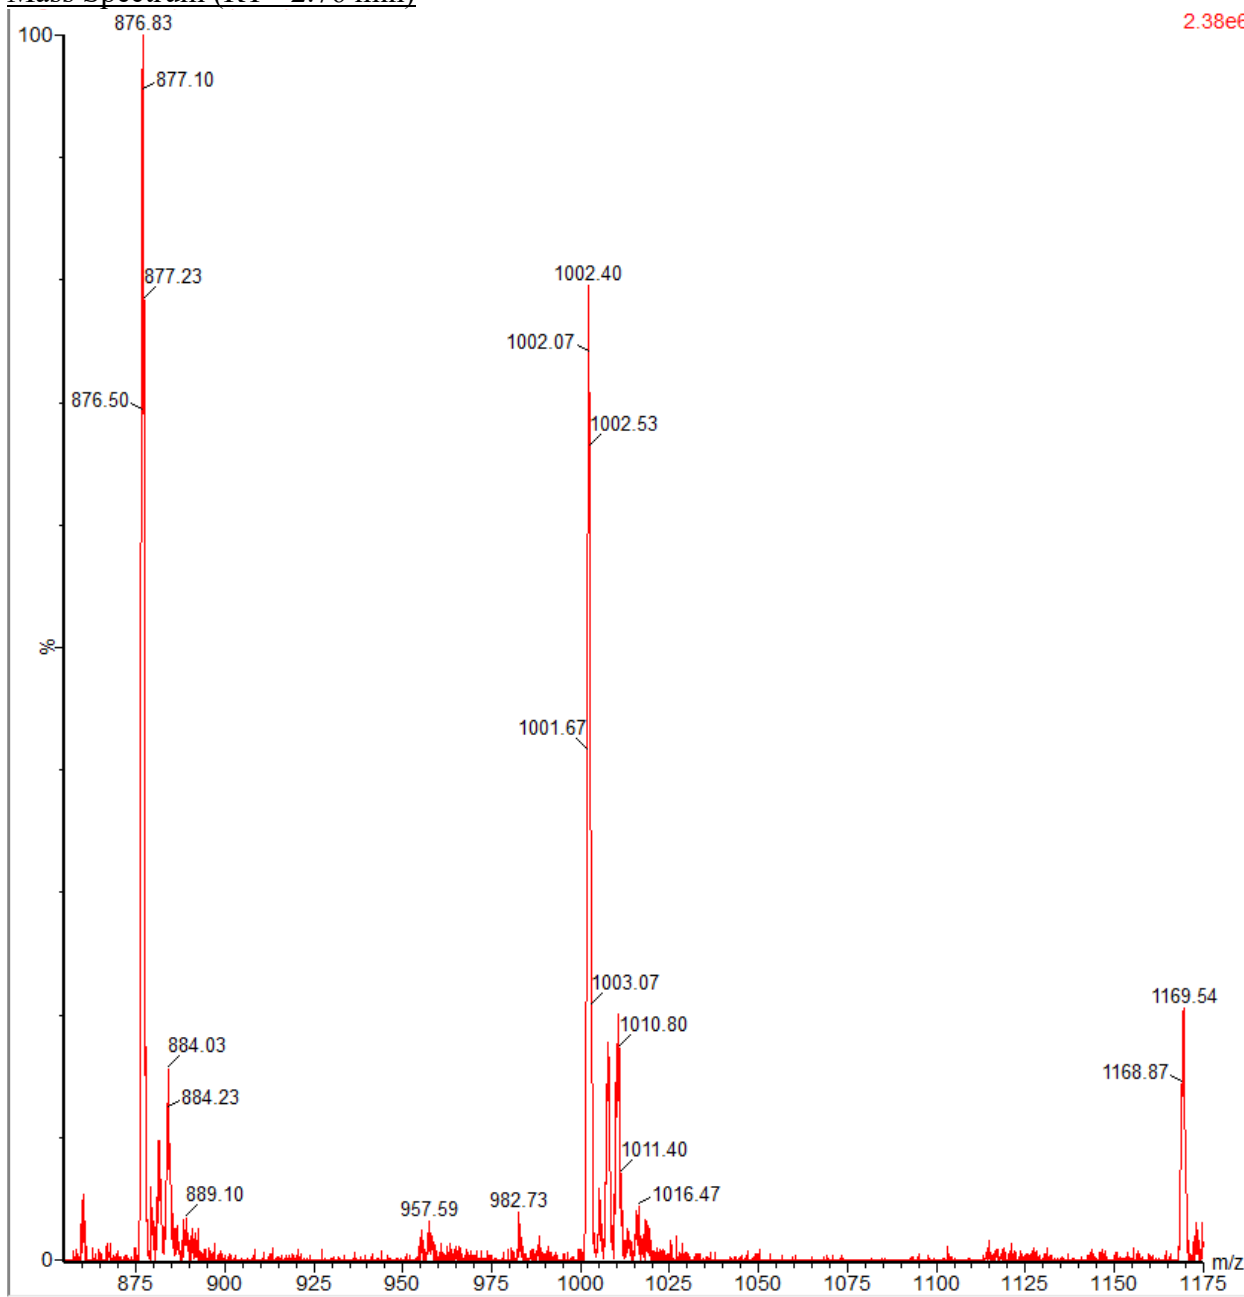

# Deconvoluted Mass Spectrum



---

### LCMS Characterization of SI-34

Produced from **SI-8** by General Procedure **2**:

Yield (A260): 74%

Expected Mass: 7327.81

Expected (M-6)/6 Ion: 1220.3

Found Deconvoluted Mass: 7328.00

Found (M-6)/6 Ion: 1219.84

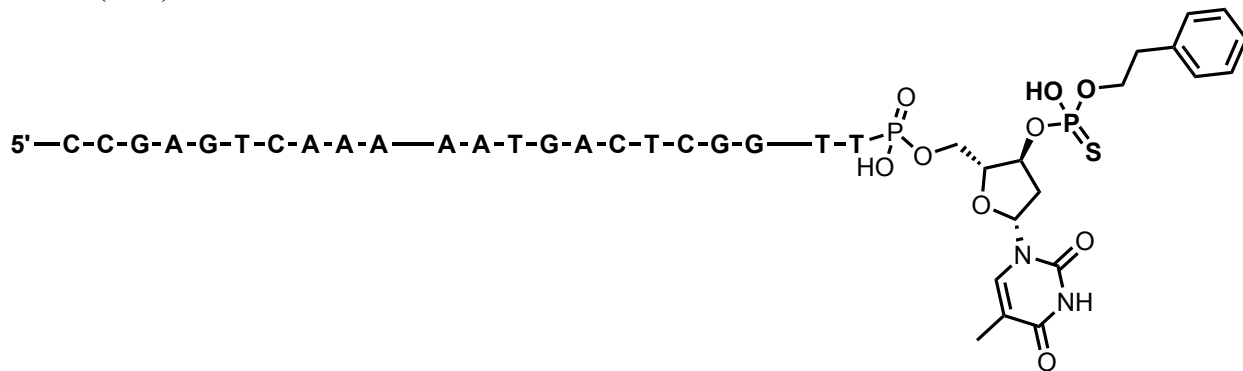

Exact Mass: 7324.19  
Molecular Weight: 7327.81

### A260 Chromatogram

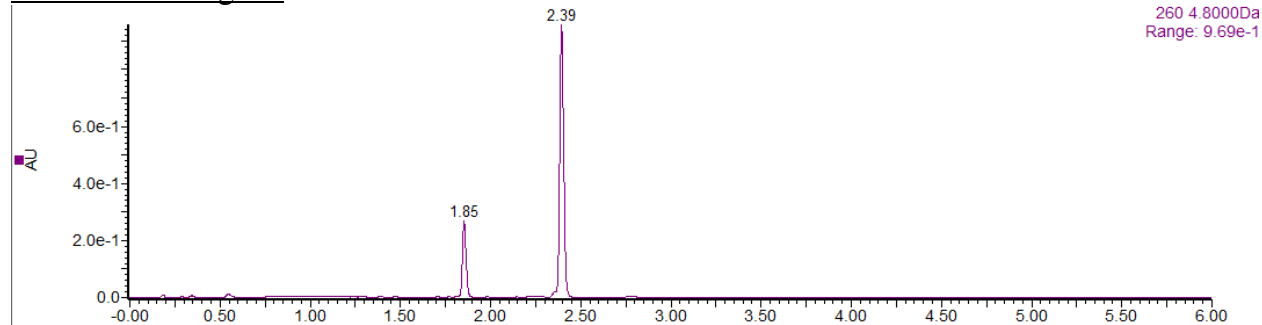

Mass Spectrum (RT= 2.39 min)

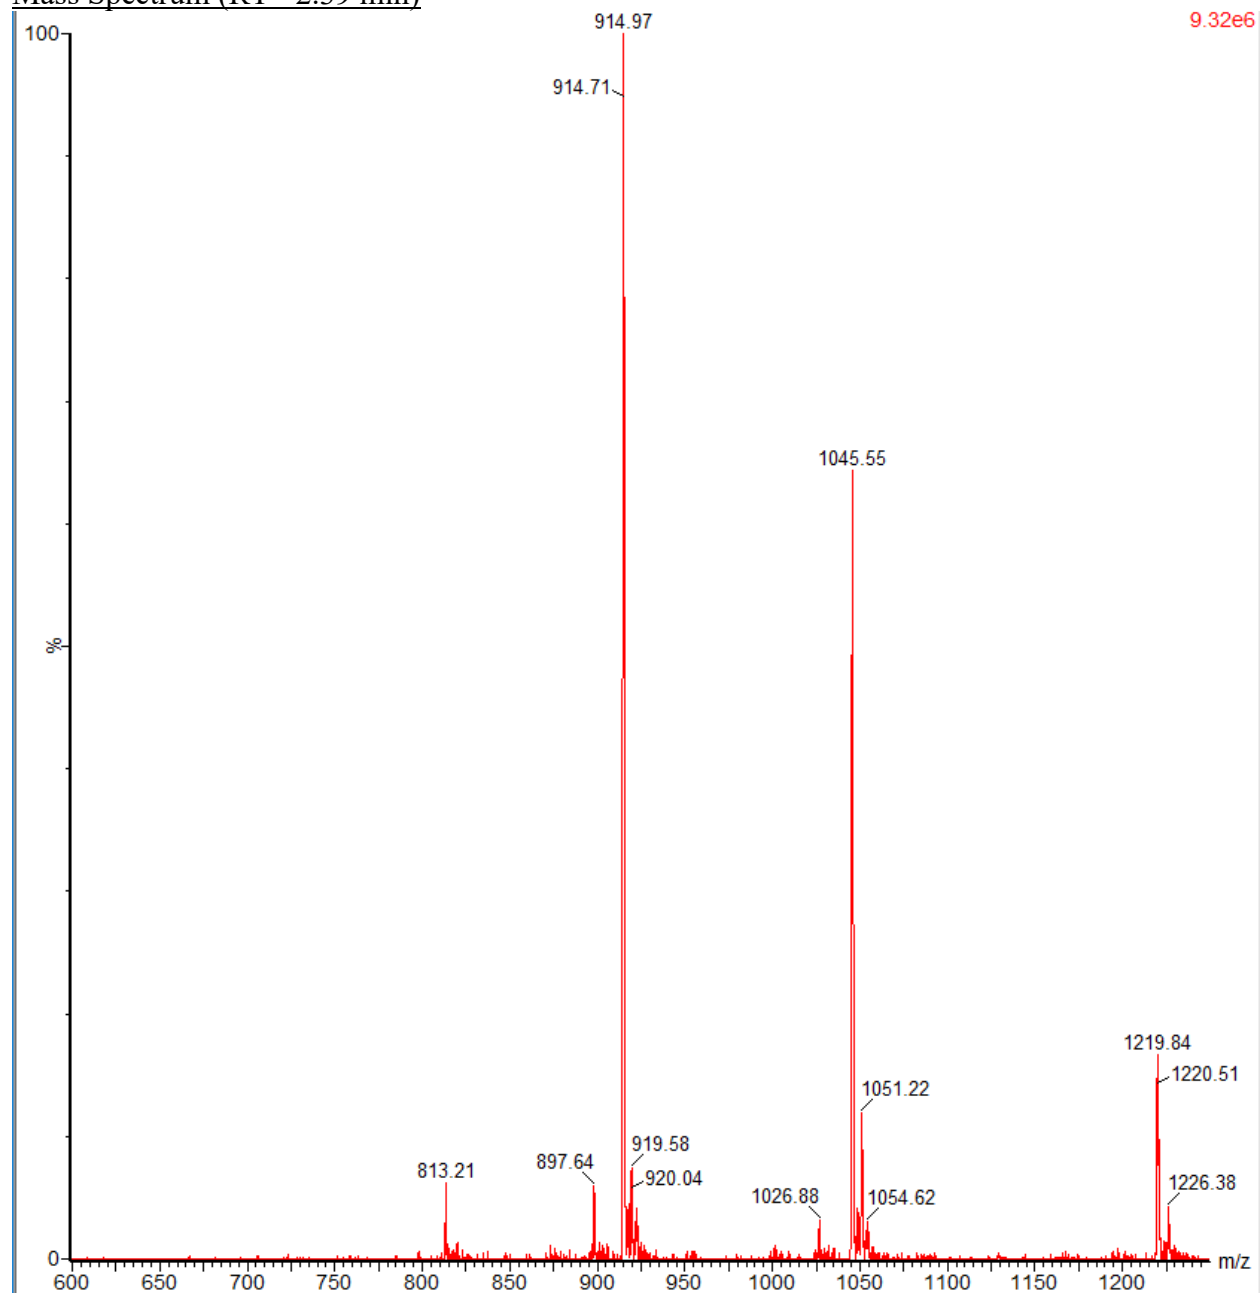

# Deconvoluted Mass Spectrum

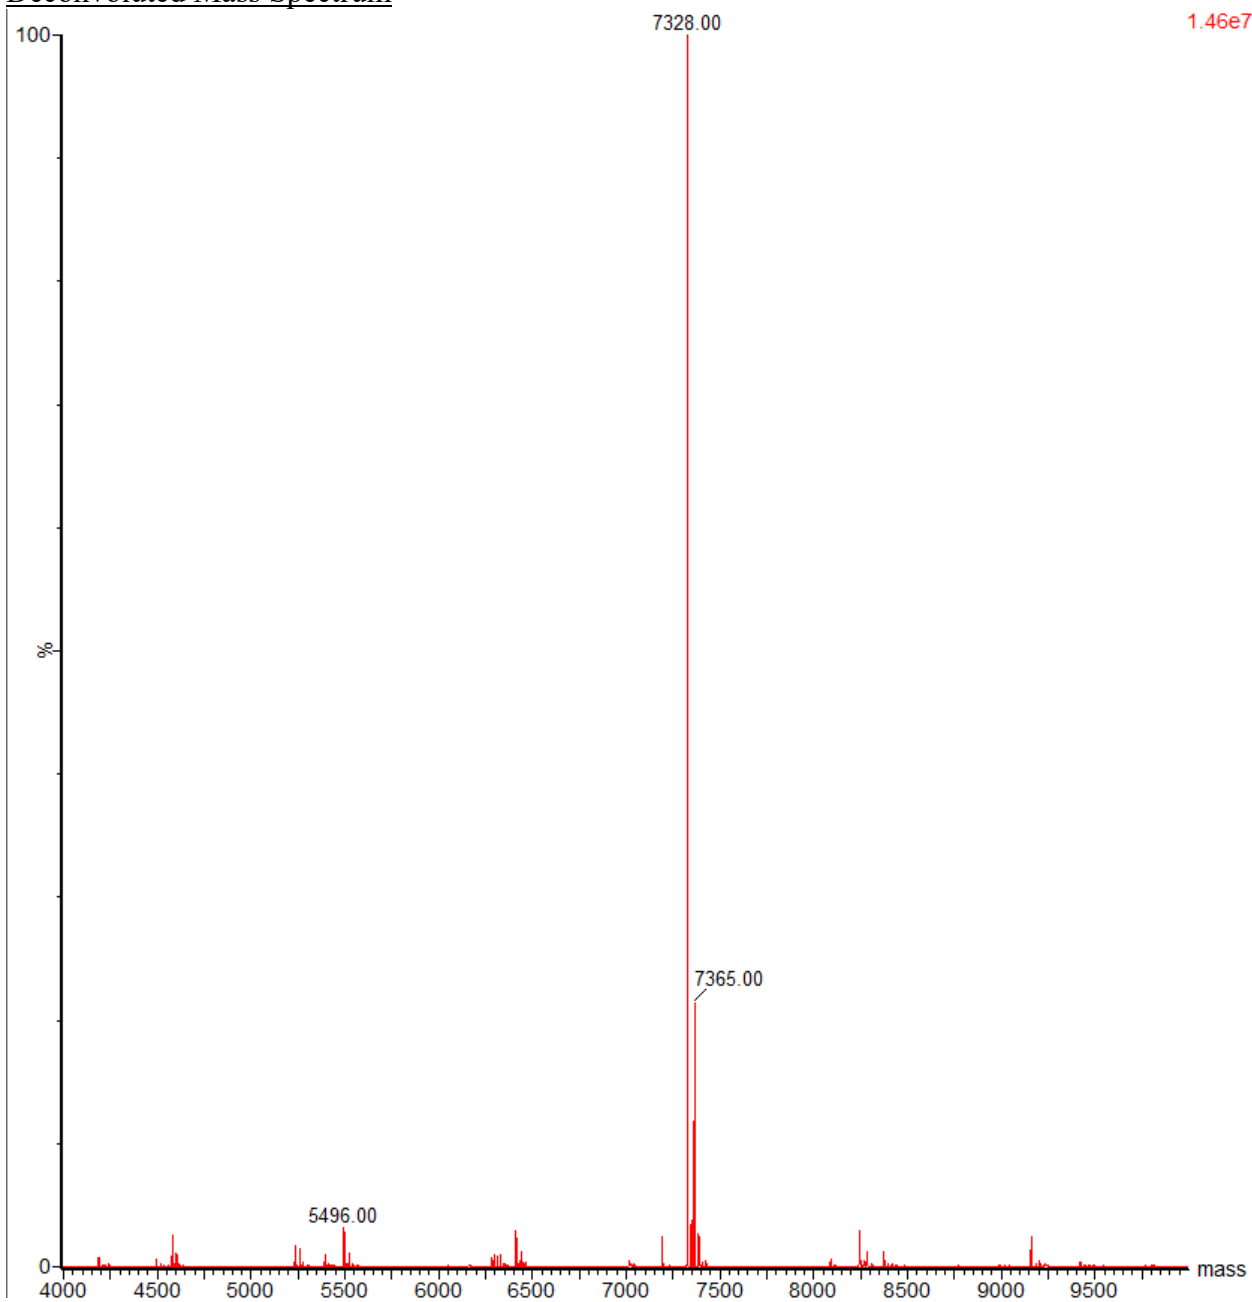

---

### LCMS Characterization of SI-35

Produced from **SI-10** by General Procedure **2**:

Yield (A260): 69%

Expected Mass: 7032.63

Expected (M-6)/6 Ion: 1171.1

Found Deconvoluted Mass: 7032.00

Found (M-6)/6 Ion: 1170.94

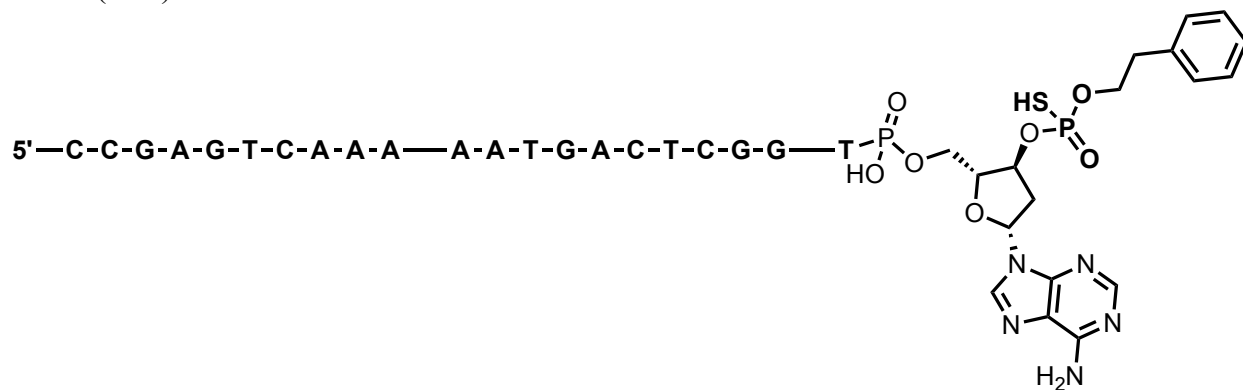

Exact Mass: 7029.16  
Molecular Weight: 7032.63

### A260 Chromatogram

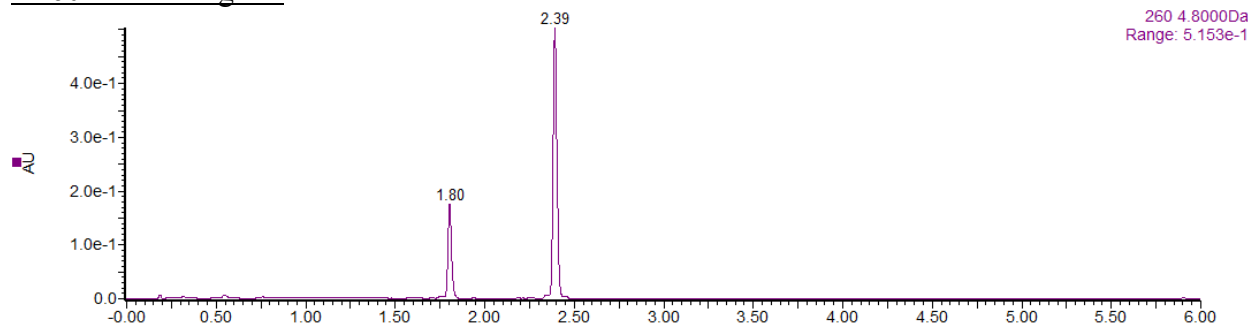

Mass Spectrum (RT= 2.39 min)

4.08e6

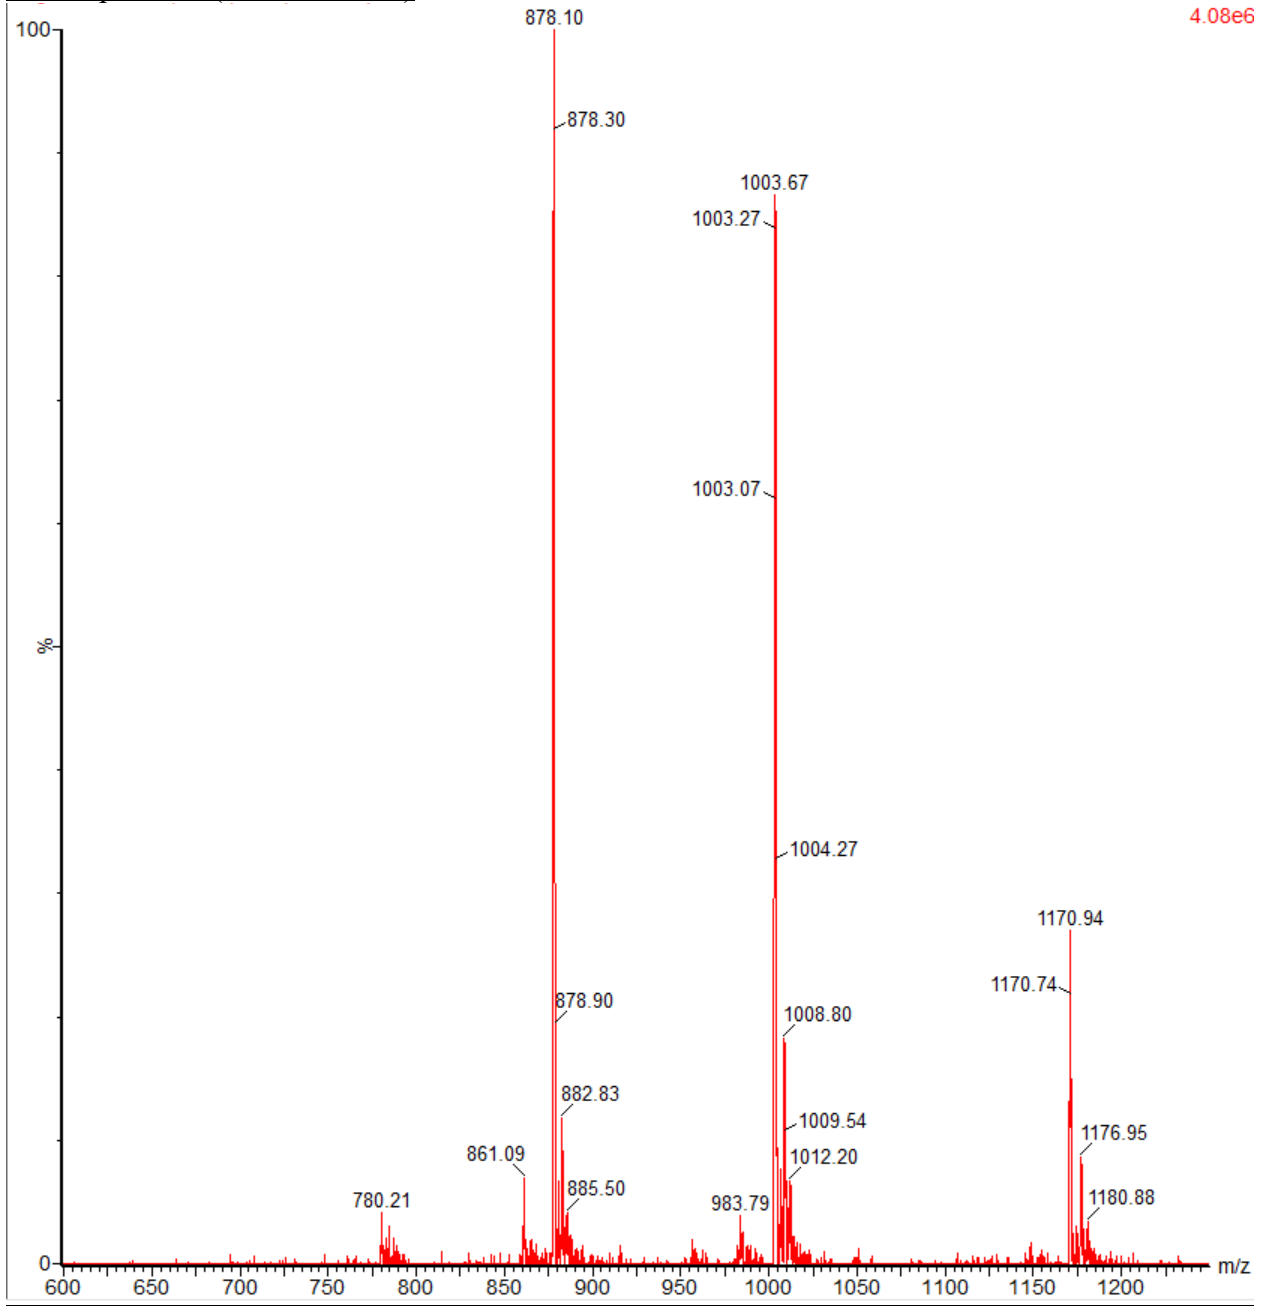

# Deconvoluted Mass Spectrum

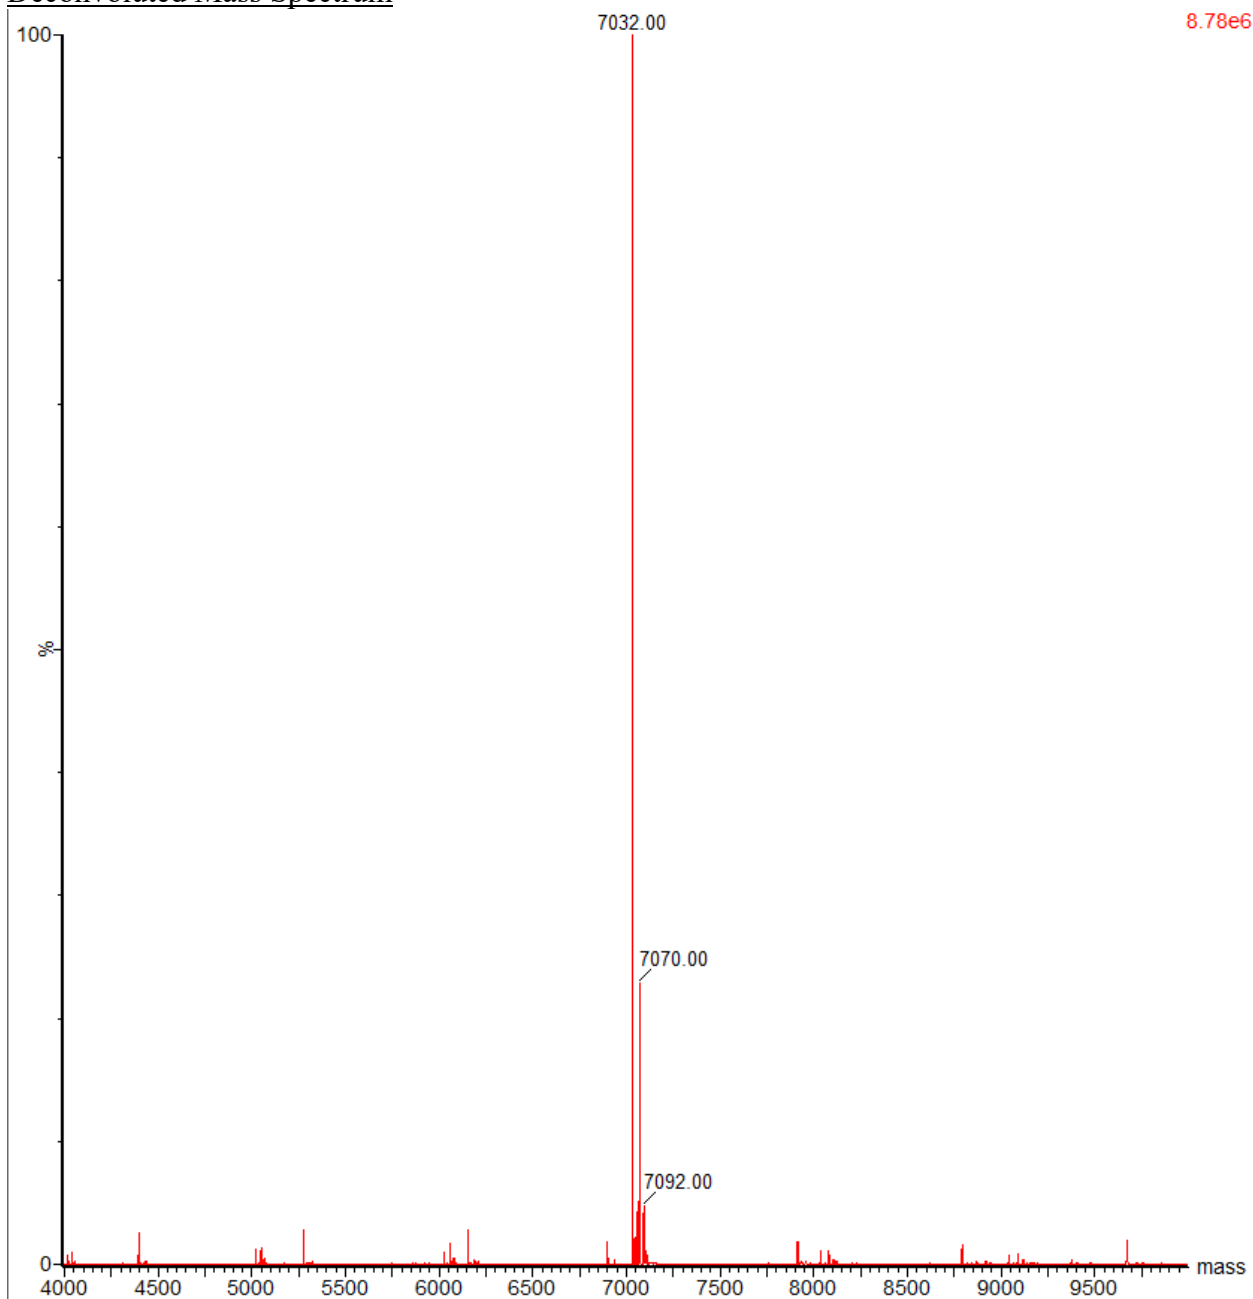



---

## LCMS Characterization of SI-36

Produced from **SI-11** by General Procedure **2**:

Yield (A260): 72%

Expected Mass: 7008.6

Expected (M-6)/6 Ion: 1167.1

Found Deconvoluted Mass: 7008.00

Found (M-6)/6 Ion: 1166.94

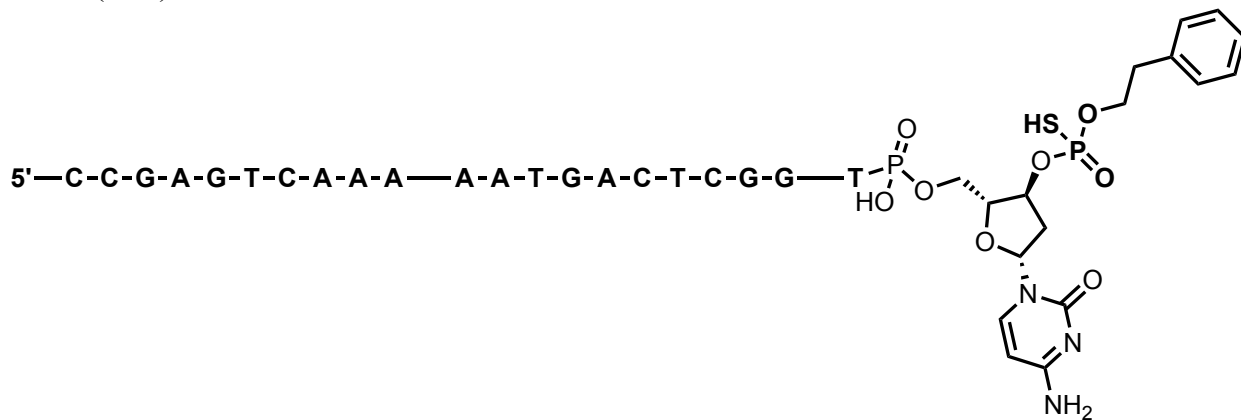

**Exact Mass: 7005.14**  
**Molecular Weight: 7008.60**

### A260 Chromatogram

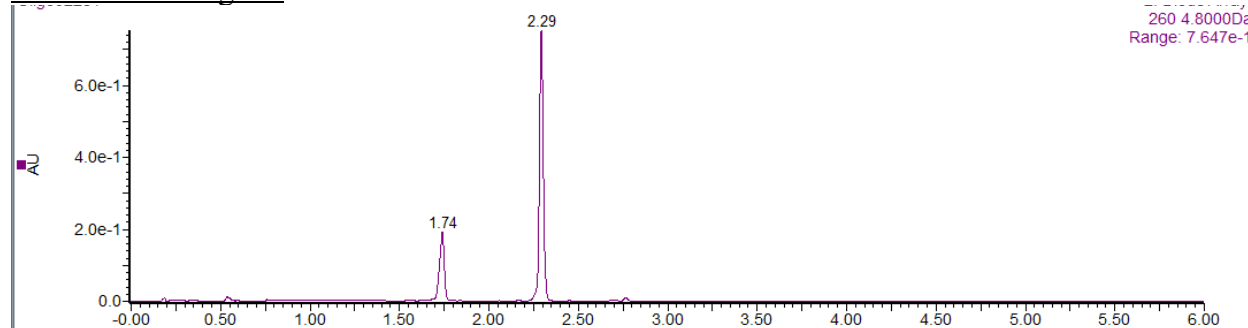

Mass Spectrum (RT= 2.29 min)

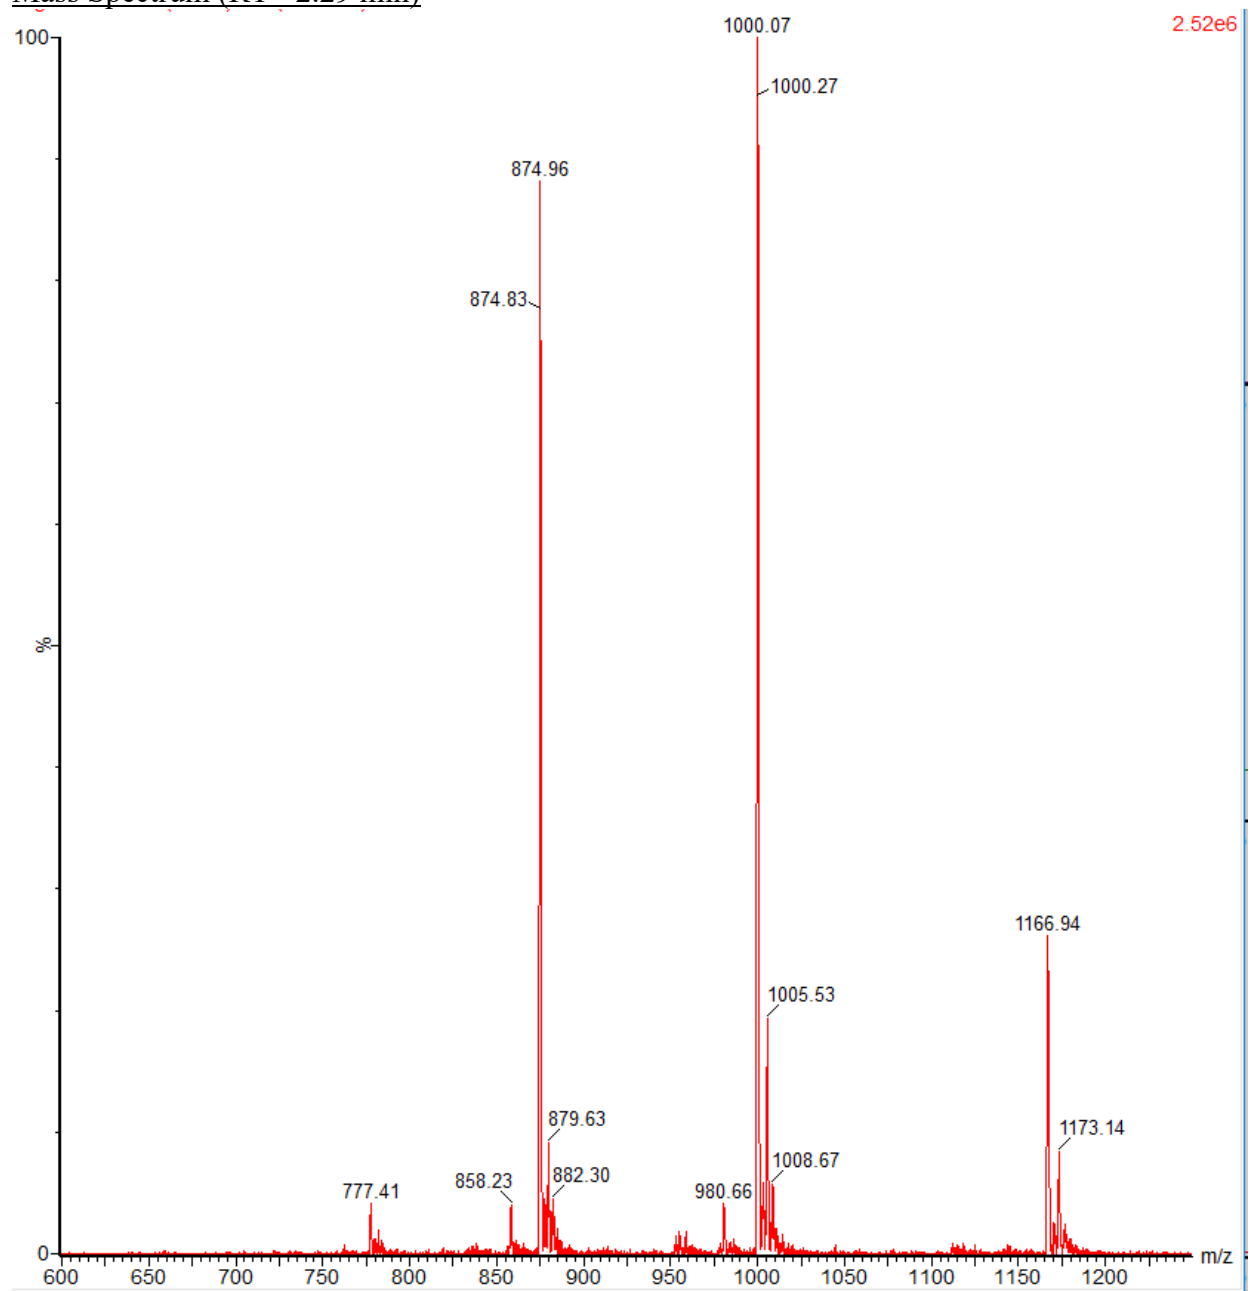

# Deconvoluted Mass Spectrum

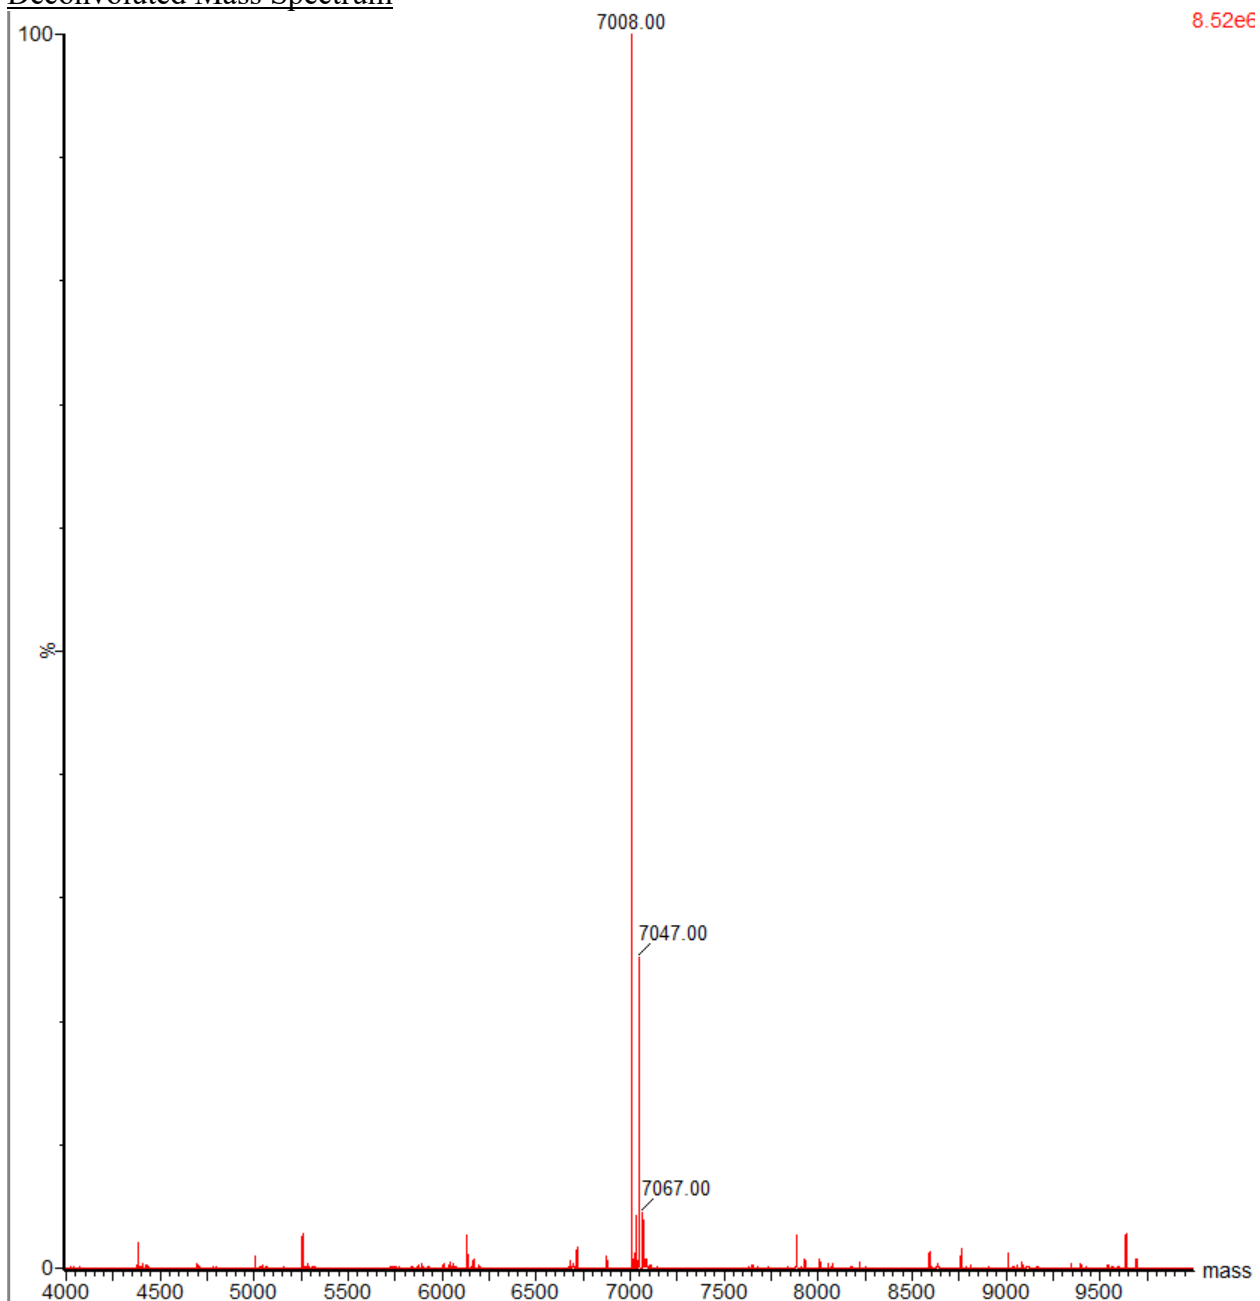

---

### LCMS Characterization of SI-37

Produced from **SI-12** by General Procedure **2**:

Yield (A260): 62%

Expected Mass: 7048.63

Expected (M-6)/6 Ion: 1173.8

Found Deconvoluted Mass: 7049.00

Found (M-6)/6 Ion: 1173.74

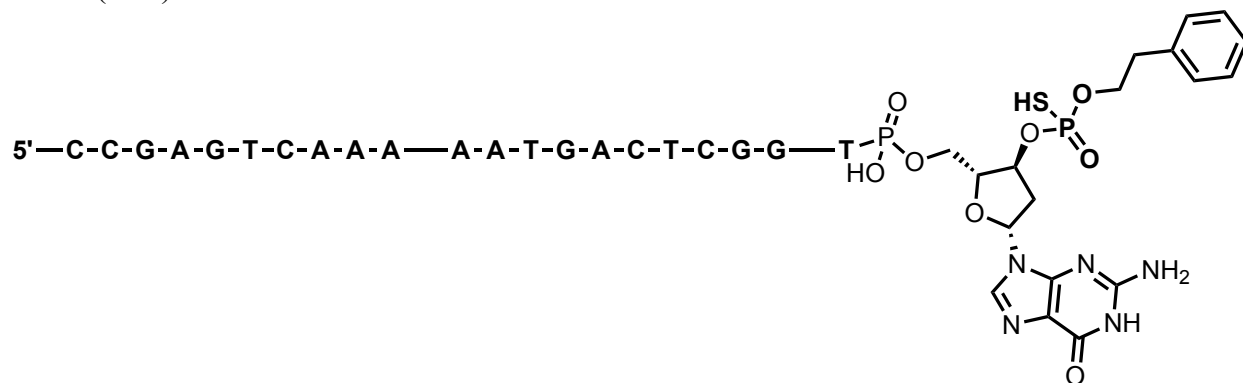

Exact Mass: 7045.15  
Molecular Weight: 7048.63

### A260 Chromatogram

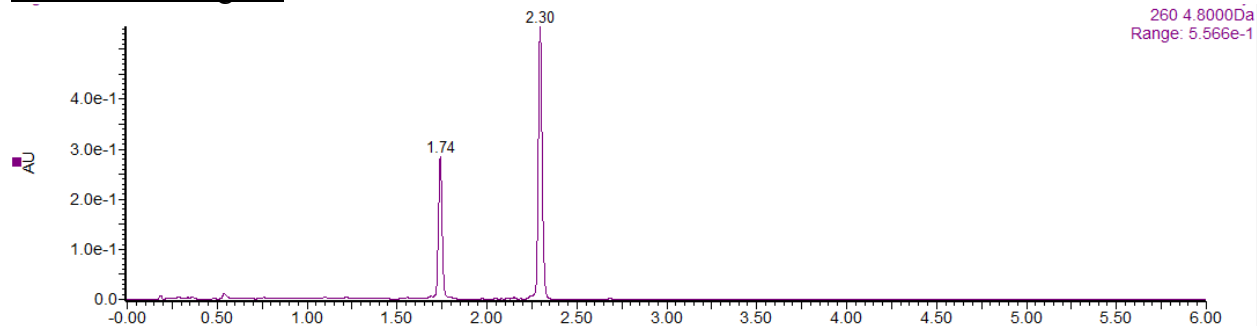

Mass Spectrum (RT= 2.30 min)

4.09e6

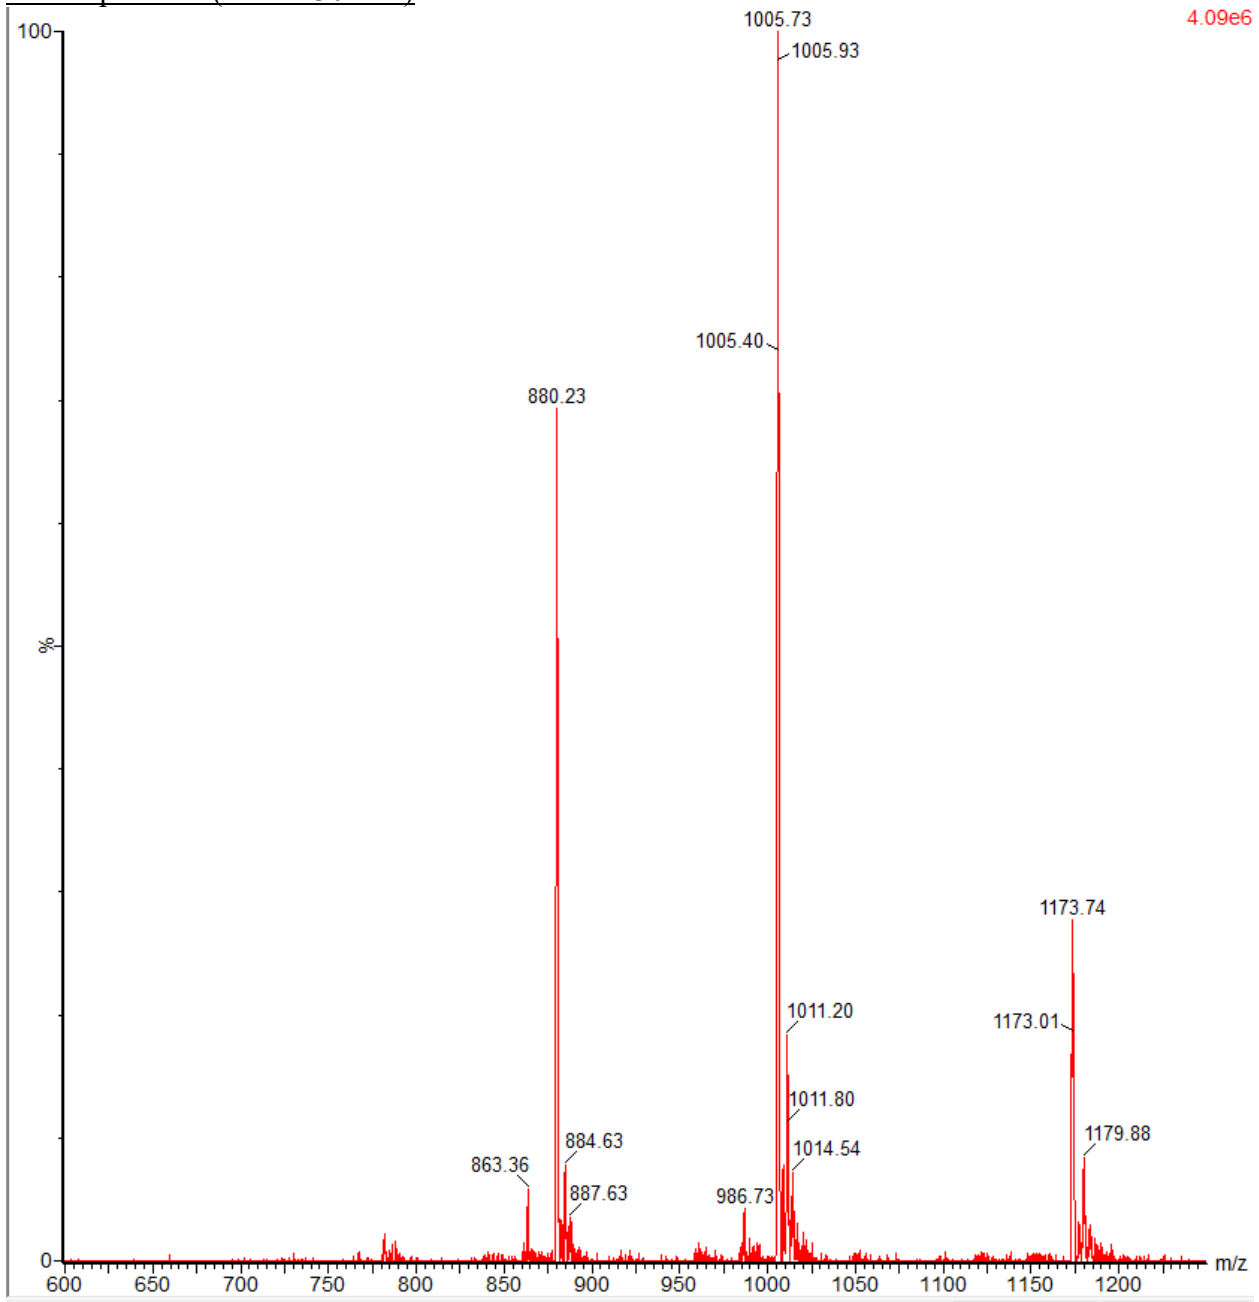

# Deconvoluted Mass Spectrum

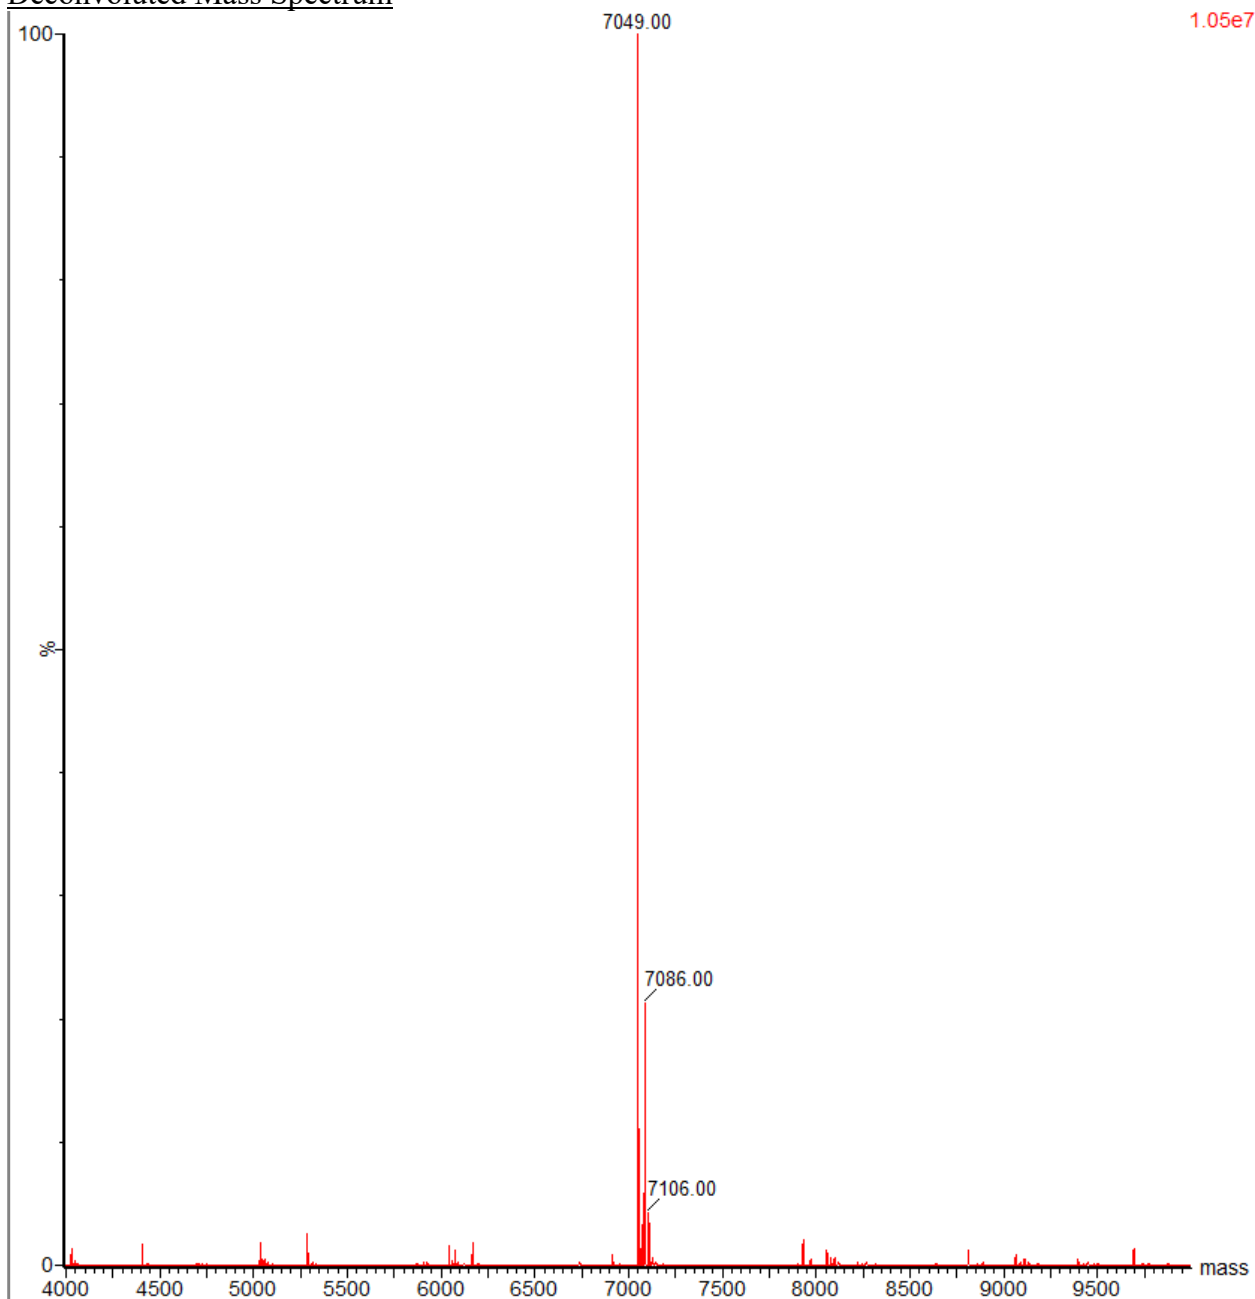

---

## Substrate scope:

### Procedure

SENDR substrate scope was analyzed by performing reactions in microcentrifuge tube as described in *General Procedure 2*. Briefly, 5 nmol of DNA **1** or **2** was loaded onto 100  $\mu\text{L}$  of equilibrated resin. This loaded resin was washed with DMA (500  $\mu\text{L}$  twice) and dry THF (500  $\mu\text{L}$  three times) and dried under vacuum.

$\Psi$ -module in MeCN (150 mM, 250  $\mu\text{L}$ ) was added to the loaded and dried resin. Then DBU (450 mM, 18  $\mu\text{L}$ ) was added to the reaction mixture. The reaction tube was vortexed for 30 seconds and incubated at room temperature or 37°C for 60 minutes. The reactions were worked up by aspirating and discarding the reaction solution, and washing the resin bed with MeCN (500  $\mu\text{L}$ ) and 1:1 MeCN:PBS (500  $\mu\text{L}$ ). Elute buffer (300  $\mu\text{L}$ ) was added to the resin bed and the tube was agitated by orbital shaker for 5-10 minutes. The DNA containing elution buffer was collected by carefully pipetting the supernatant. DNA was isolate *via* ethanol precipitation. Ethanol precipitation was performed by adding 10% v/v of a NaCl solution (30  $\mu\text{L}$ , 5M) to the elute buffer and three volumes of cold ethanol (-20 °C) were added to the tube (~1000 $\mu\text{L}$ ) and incubated for 18 hours at -20 °C. The tube was then centrifuged at 13,000 rpm for 15 minutes to pellet the DNA, and the extra ethanol was decanted off. The tubes were dried *via* speed vacuum, the DNA was dissolved, and HPLC-MS analysis was performed.

## Characterization of Substrate Scope

### LCMS Characterization of 5

Produced from **1** by General Procedure **2**:

Using **Ψ-2**

Yield (A260): 94%

Expected Mass: 7102.72

Expected (M-6)/6 Ion: 1182.20

Found Deconvoluted Mass: 7102.0

Found (M-6)/6 Ion: 1182.15

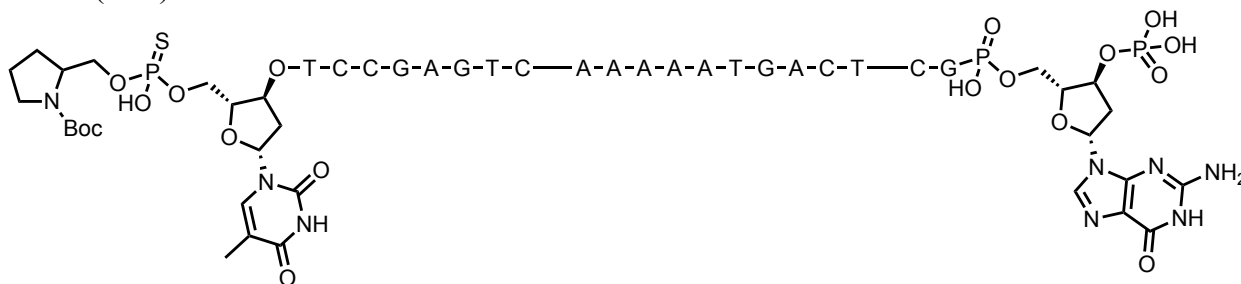

Exact Mass: 7099.21  
Molecular Weight: 7102.71

### A260 Chromatogram

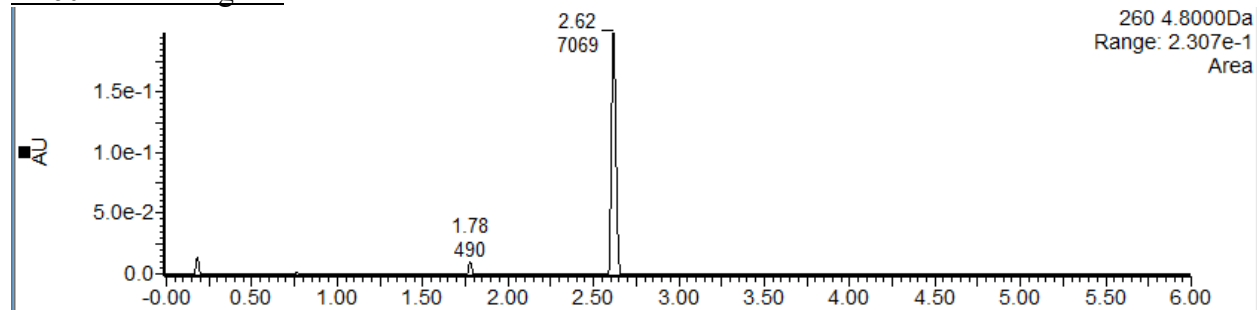



Mass Spectrum (RT= 2.62 min)

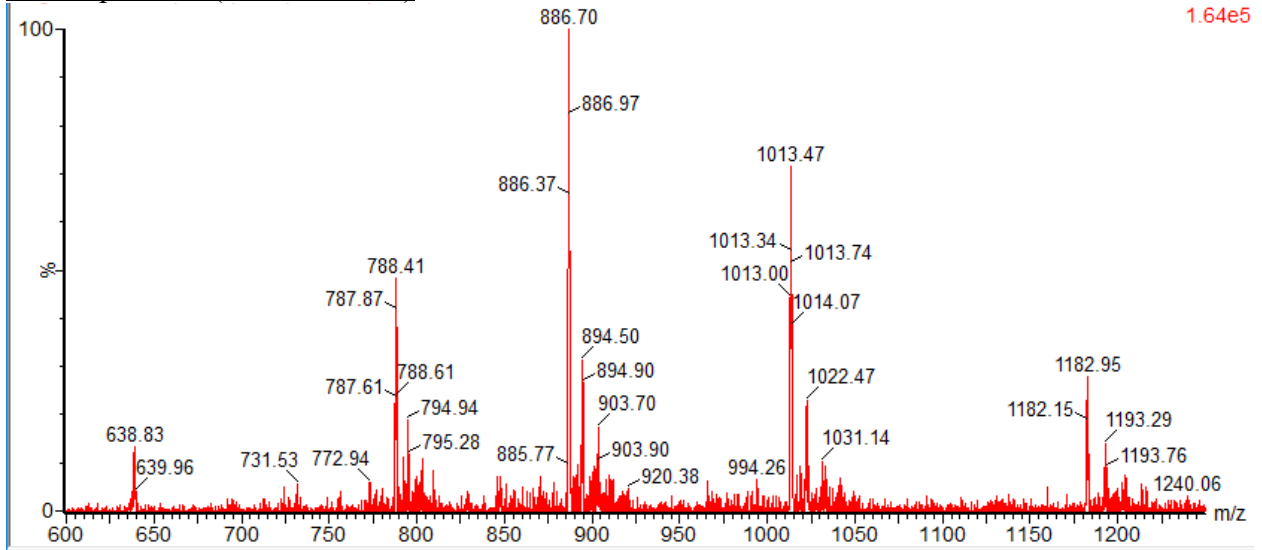

Deconvoluted Mass Spectrum

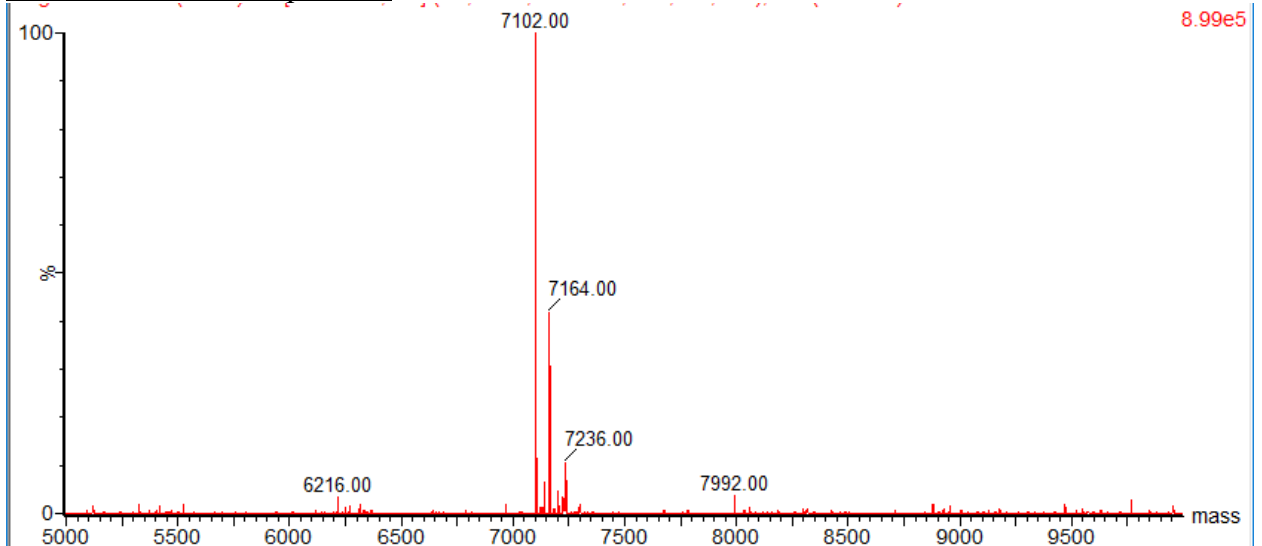

## LCMS Characterization of 6

Produced from **2** by General Procedure **2**:

Using **Ψ-2**

Yield (A260): 74%

Expected Mass: 7102.71

Expected (M-6)/6 Ion: 1182.8

Found Deconvoluted Mass: 7102.0

Found (M-6)/6 Ion: 1182.69

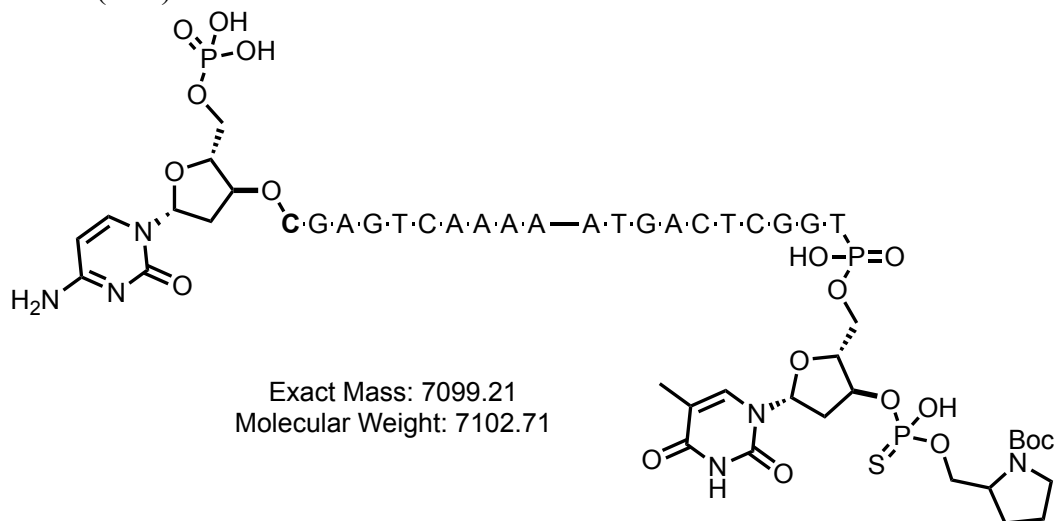

### A260 Chromatogram

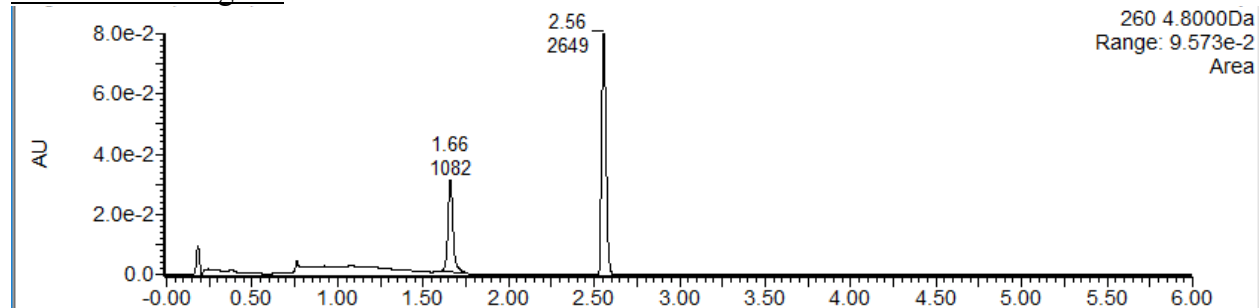

Mass Spectrum (RT= 2.56 min)

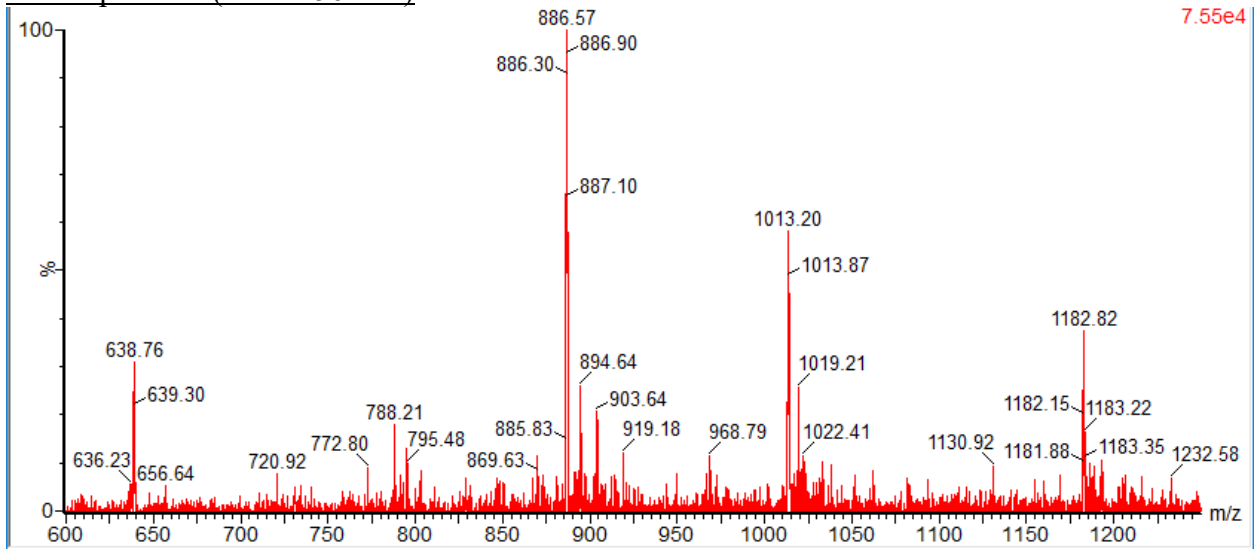

Deconvoluted Mass Spectrum

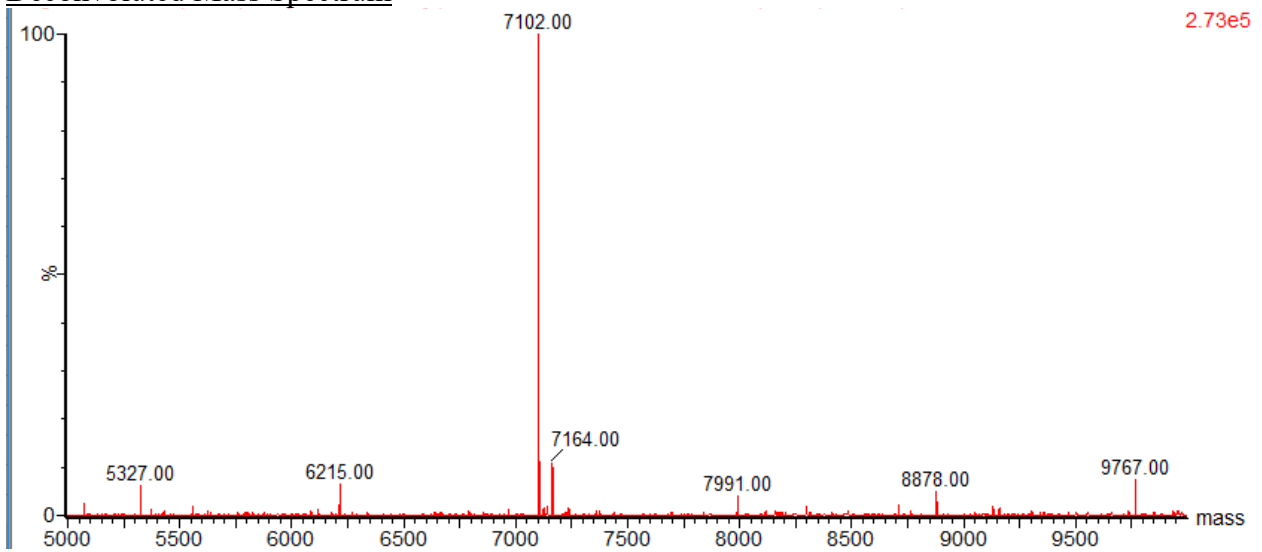

## LCMS Characterization of 7

Produced from **1** by General Procedure **2**:

Using **Ψ-3**

Yield (A260): 88%

Expected Mass: 7076.63

Expected (M-6)/6 Ion: 1177.86

Found Deconvoluted Mass: 7075.00

Found (M-6)/6 Ion: 1178.01

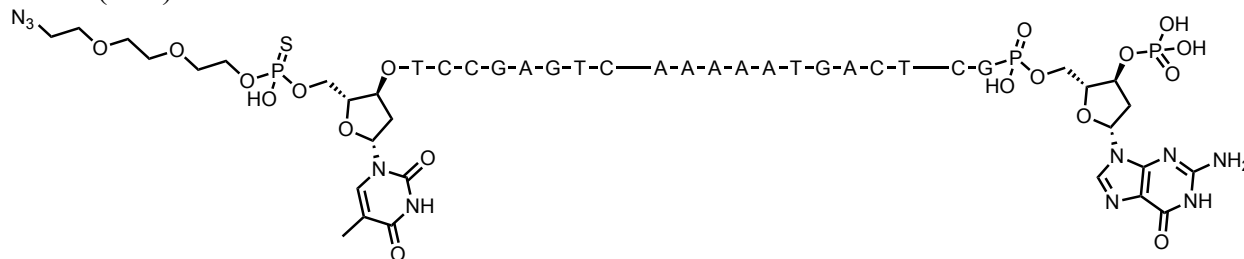

Exact Mass: 7073.17  
Molecular Weight: 7076.63

### A260 Chromatogram

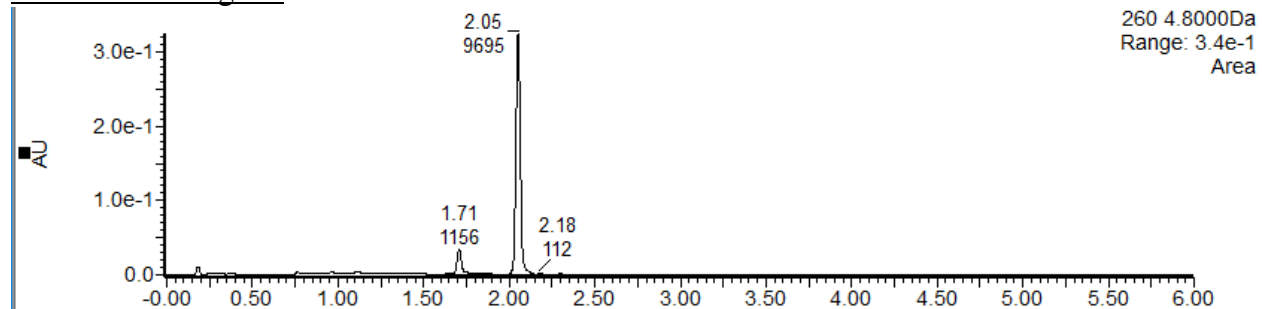

Mass Spectrum (RT= 2.05 min)

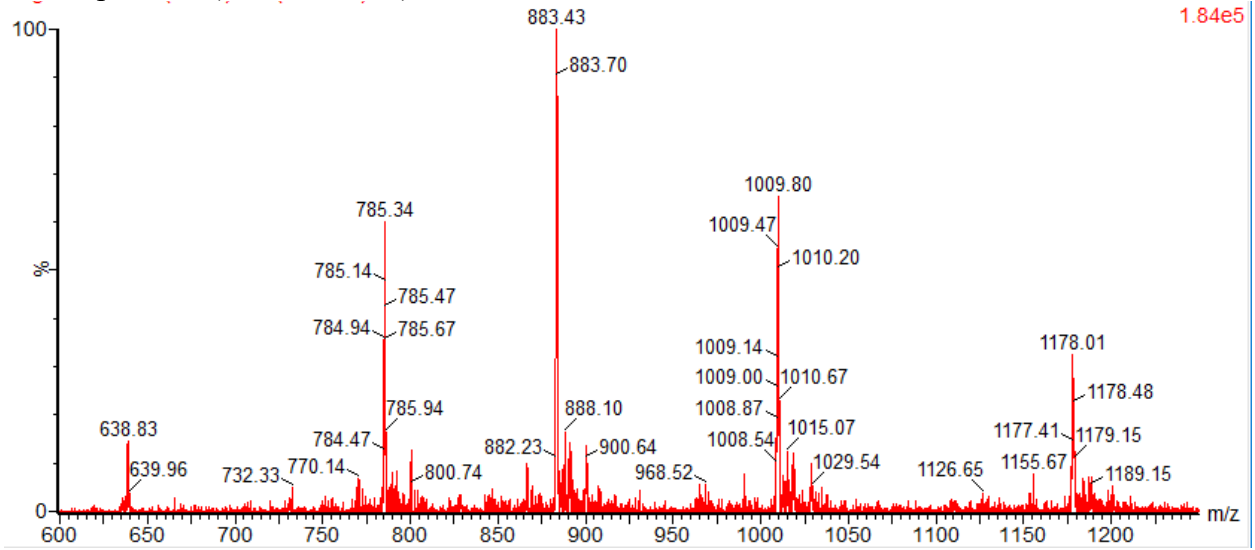

Deconvoluted Mass Spectrum

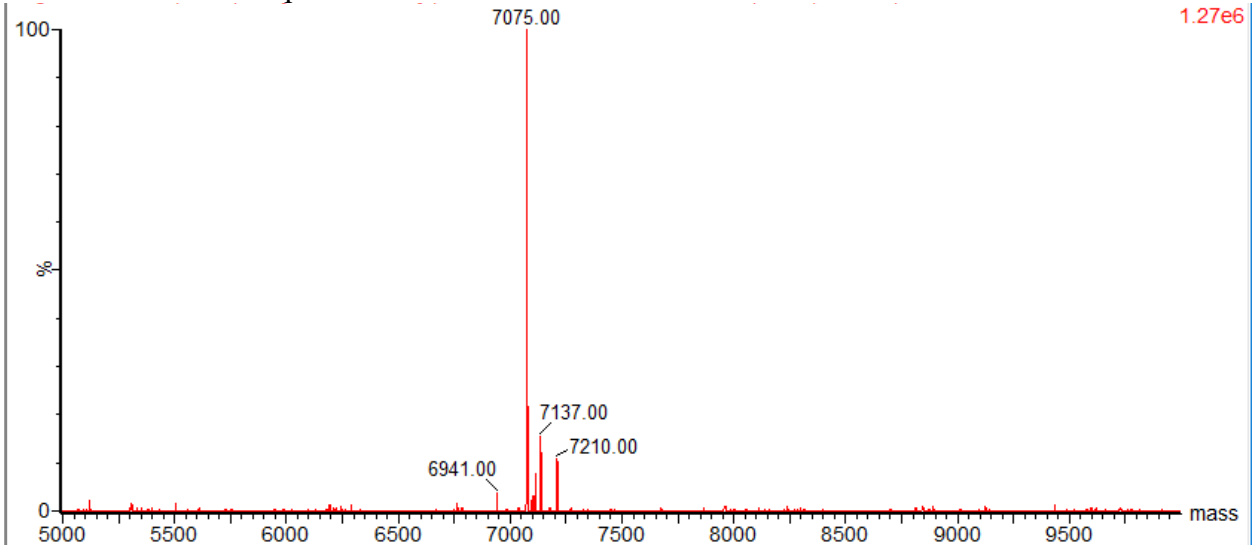

## LCMS Characterization of 8

Produced from **2** by General Procedure **2**:

Using **Ψ-3**

Yield (A260): 74%

Expected Mass: 7076.63

Expected (M-6)/6 Ion: 1177.86

Found Deconvoluted Mass: 7076.0

Found (M-6)/6 Ion: 1177.55

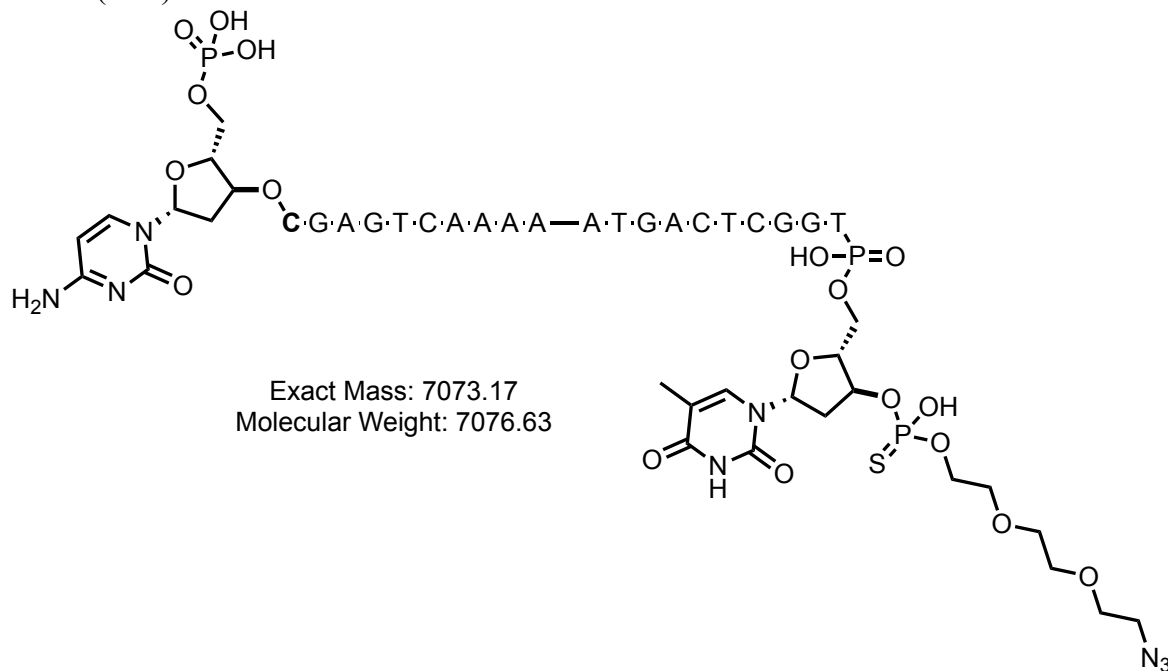

### A260 Chromatogram

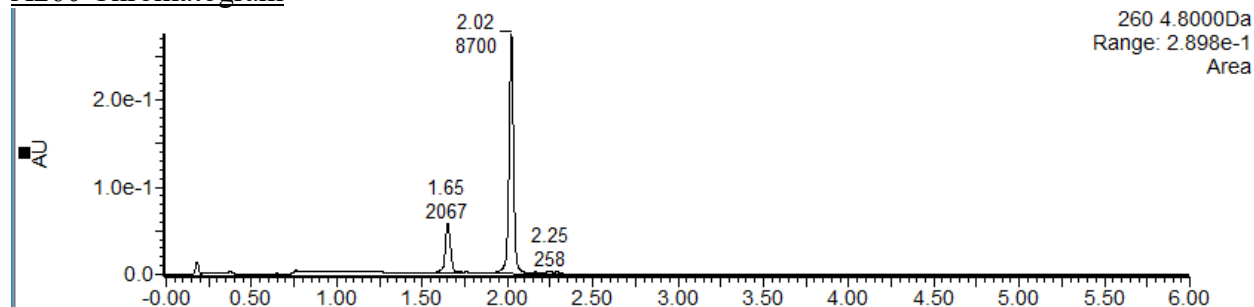

Mass Spectrum (RT= 2.02 min)

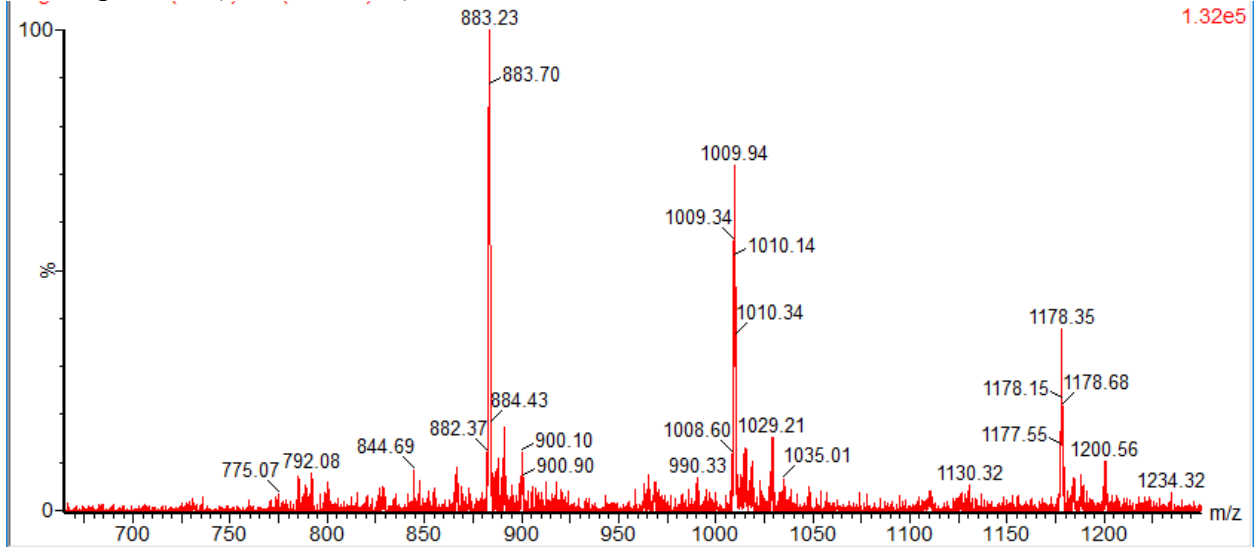

Deconvoluted Mass Spectrum

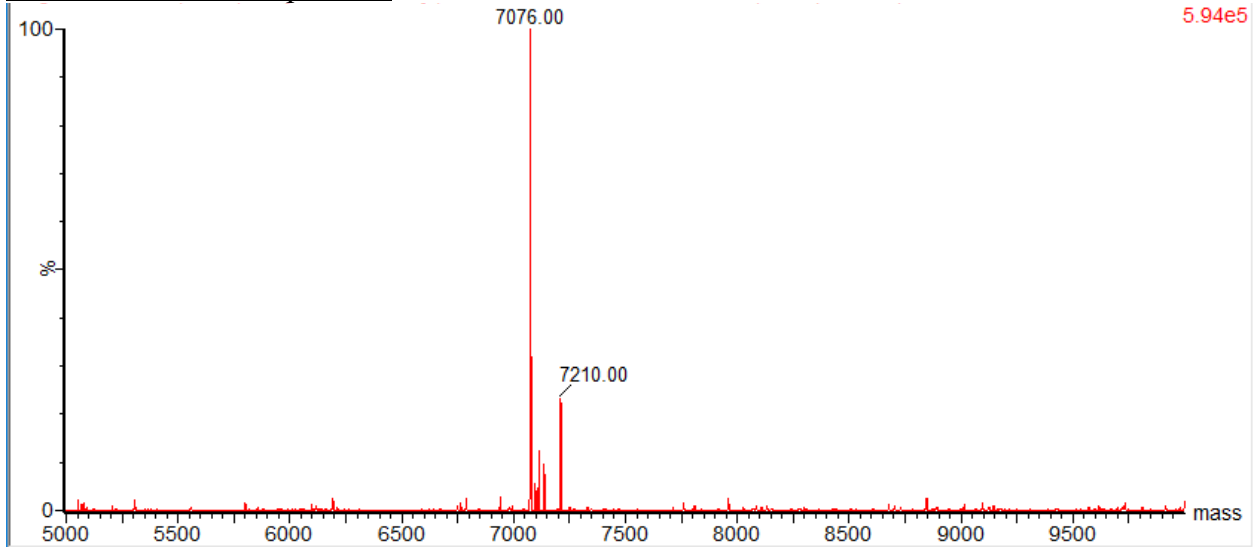

## LCMS Characterization of 9

Produced from **1** by General Procedure **2**:

Using  $\Psi$ -4

Yield (A260): 78%

Expected Mass: 7064.62

Expected (M-6)/6 Ion: 1175.85

Found Deconvoluted Mass: 7064.00

Found (M-6)/6 Ion: 1176.14

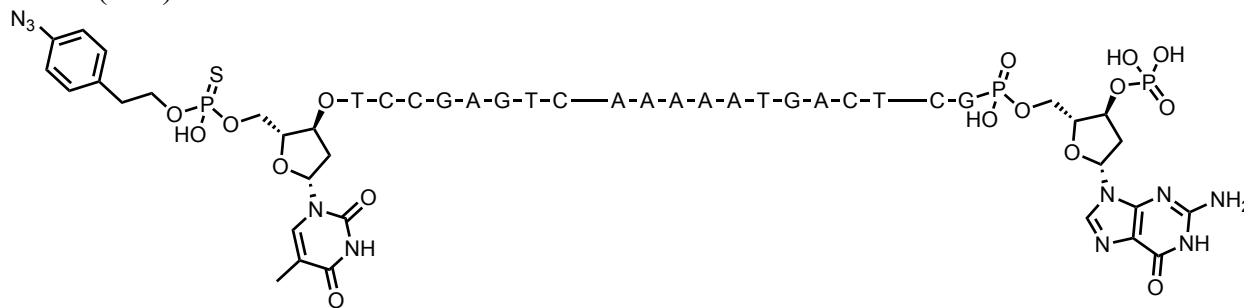

Exact Mass: 7061.15  
Molecular Weight: 7064.62

### A260 Chromatogram

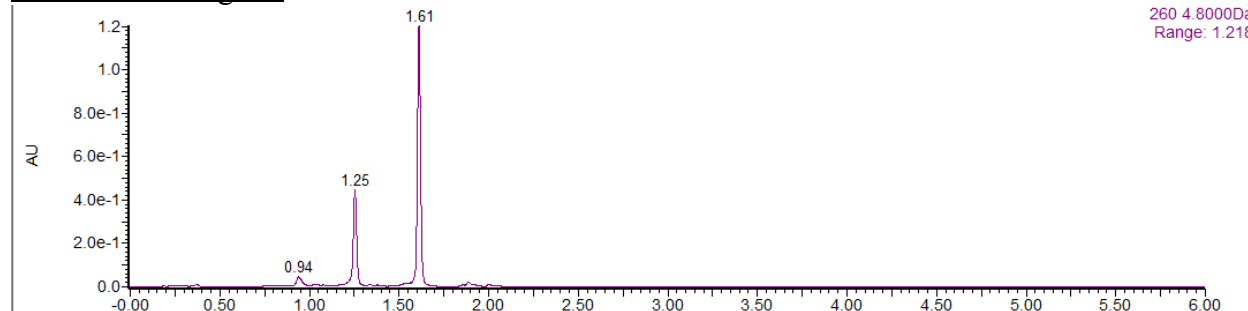



Mass Spectrum (RT= 1.61 min)

7.92e5

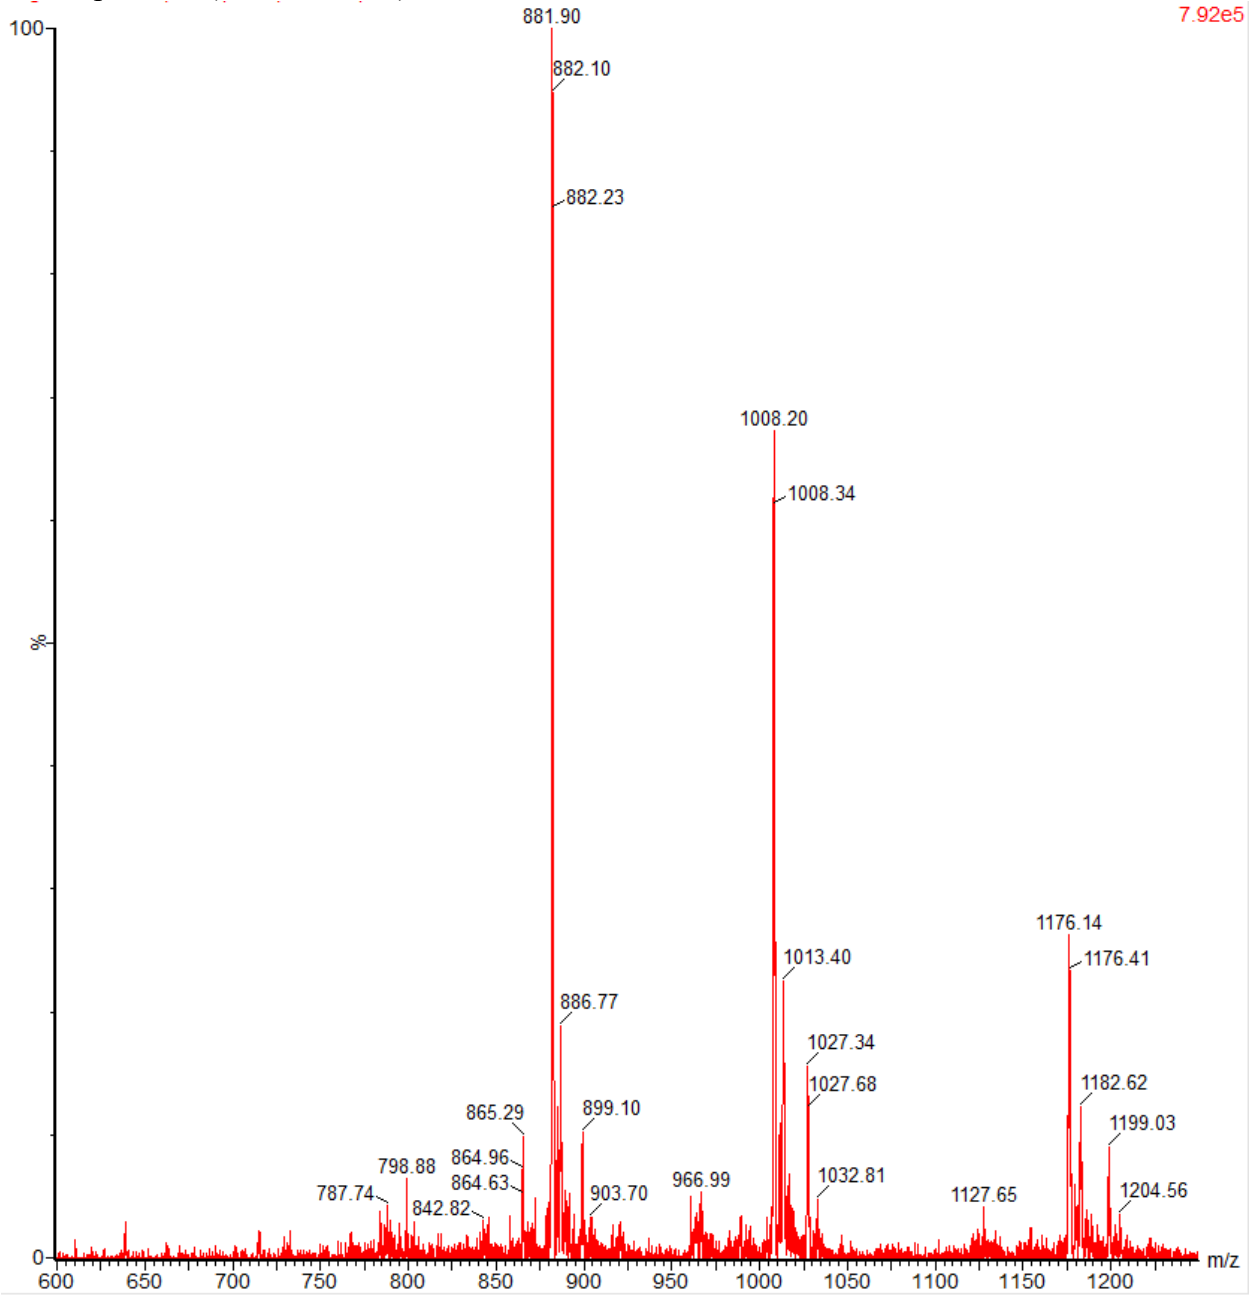

# Deconvoluted Mass Spectrum

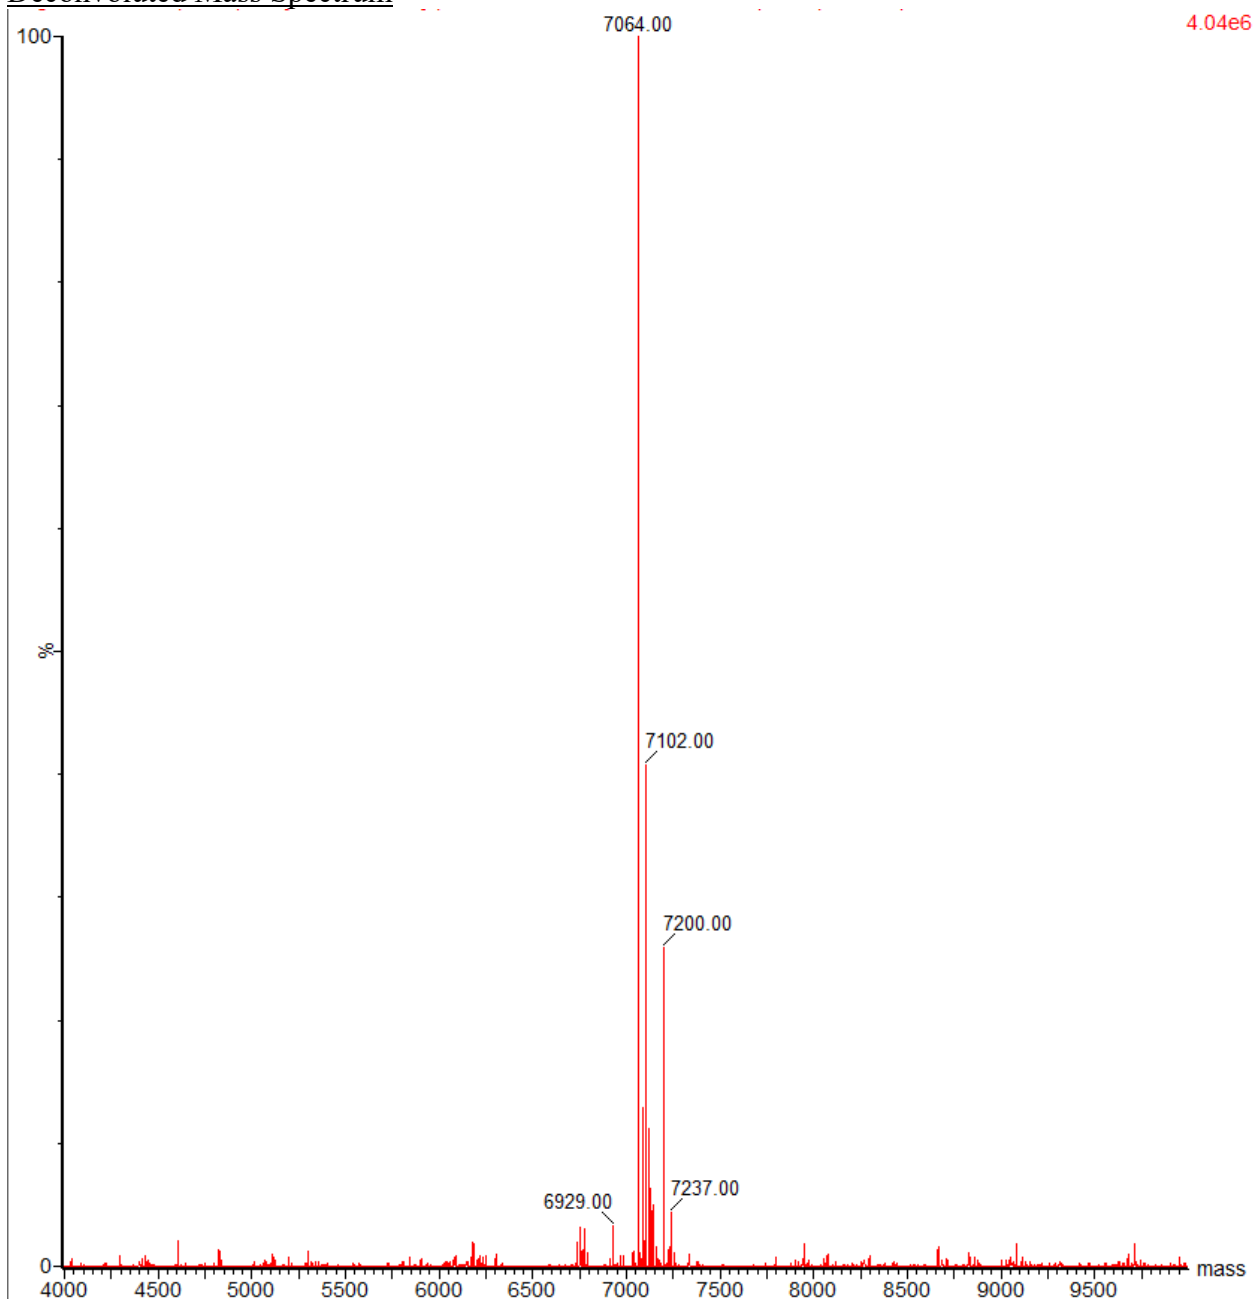

## LCMS Characterization of 10

Produced from **2** by General Procedure **2**:

Using  $\Psi$ -4

Yield (A260): 78%

Expected Mass: 7064.62

Expected (M-6)/6 Ion: 1175.85

Found Deconvoluted Mass: 7065.00

Found (M-6)/6 Ion: 1175.75

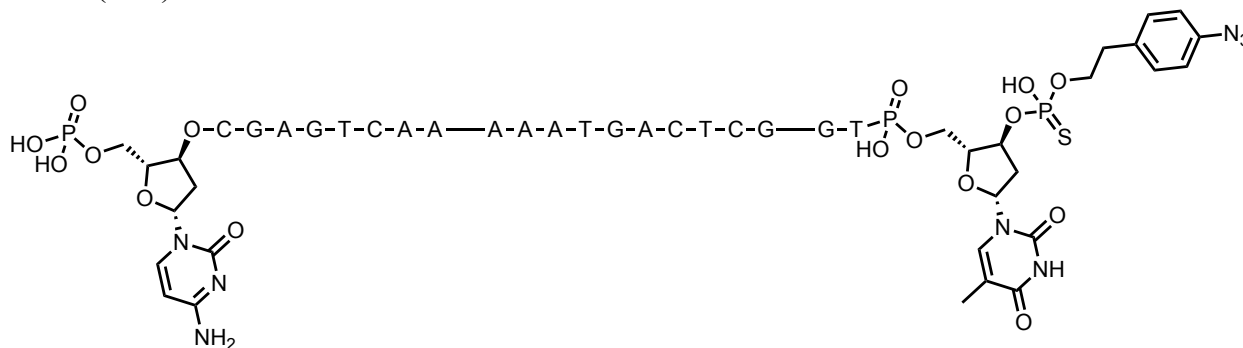

Exact Mass: 7061.15  
Molecular Weight: 7064.62

## A260 Chromatogram (Small Molecule at RT=1 min)

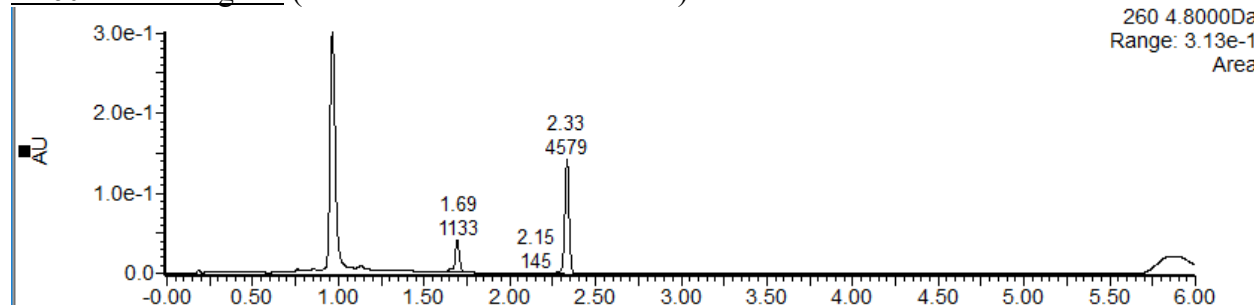

Mass Spectrum (RT= 2.33 min)

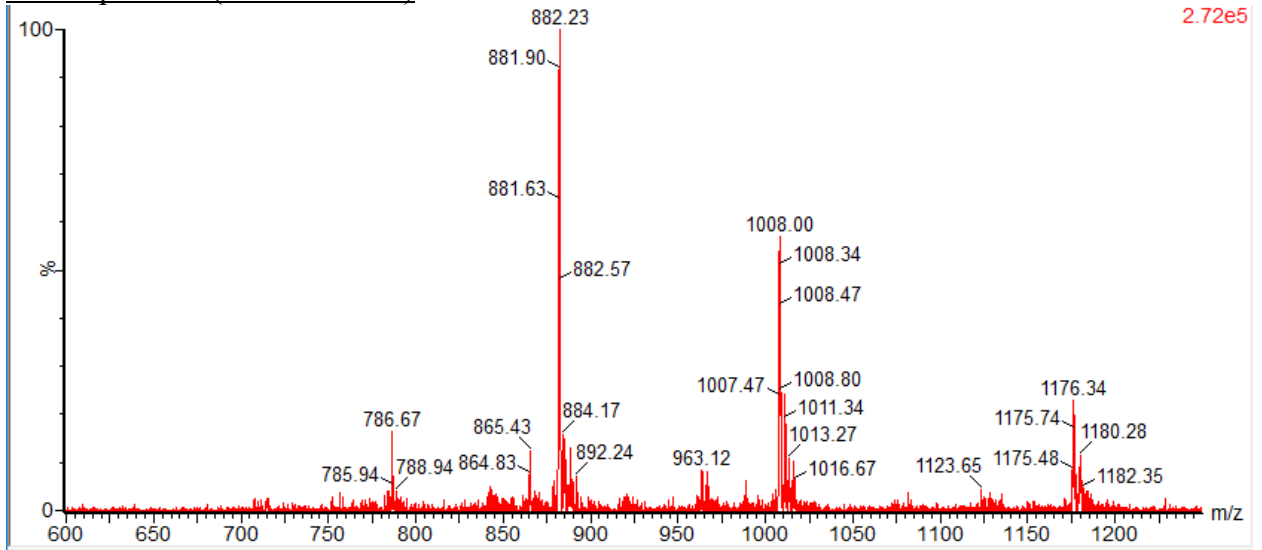

Deconvoluted Mass Spectrum

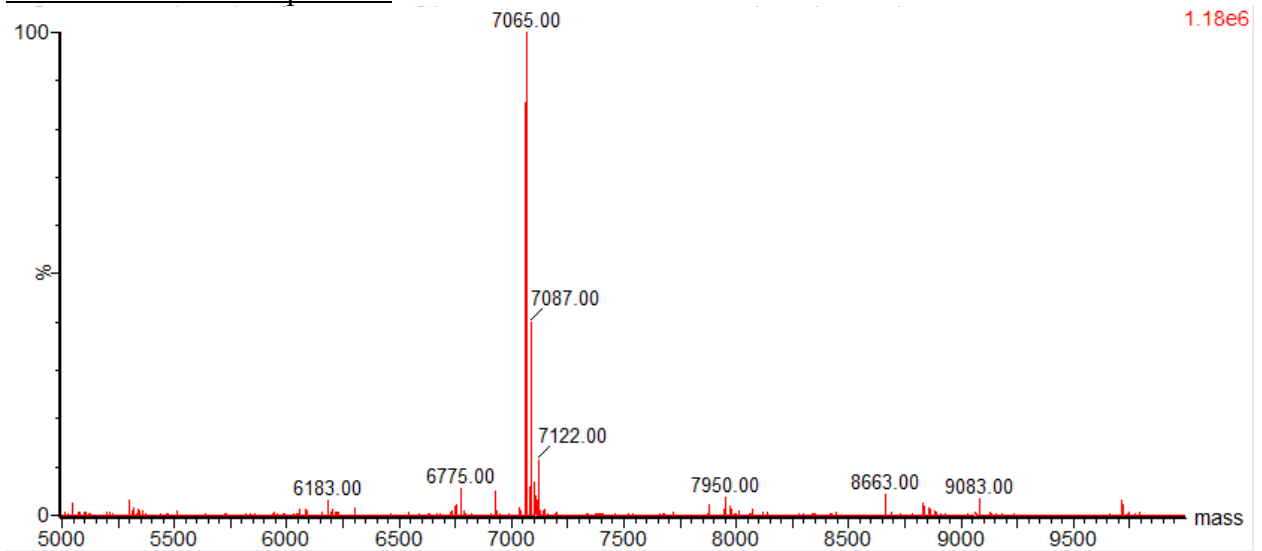

## LCMS Characterization of 11

Produced from **1** by General Procedure **2** (Reaction run at 45°C):

Using **Ψ-8**

Yield (A260): 76%

Expected Mass: 7144.83

Expected (M-6)/6 Ion: 1189.8

Found Deconvoluted Mass: 7144.00

Found (M-6)/6 Ion: 1189.42

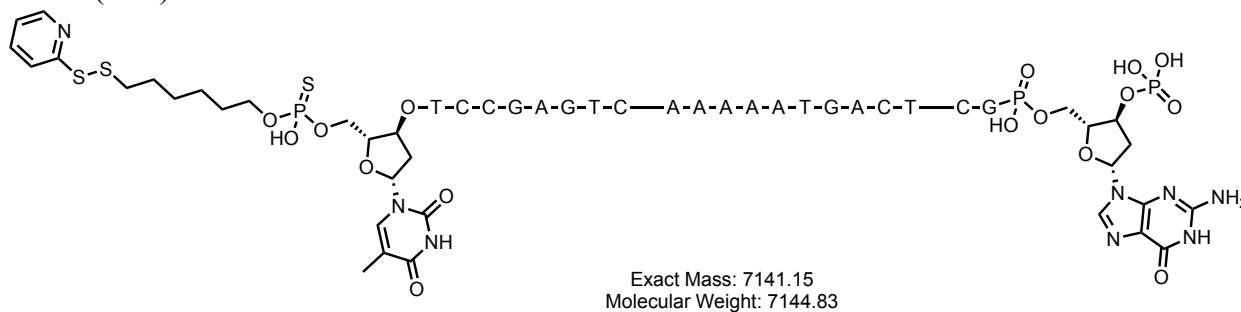

## A260 Chromatogram

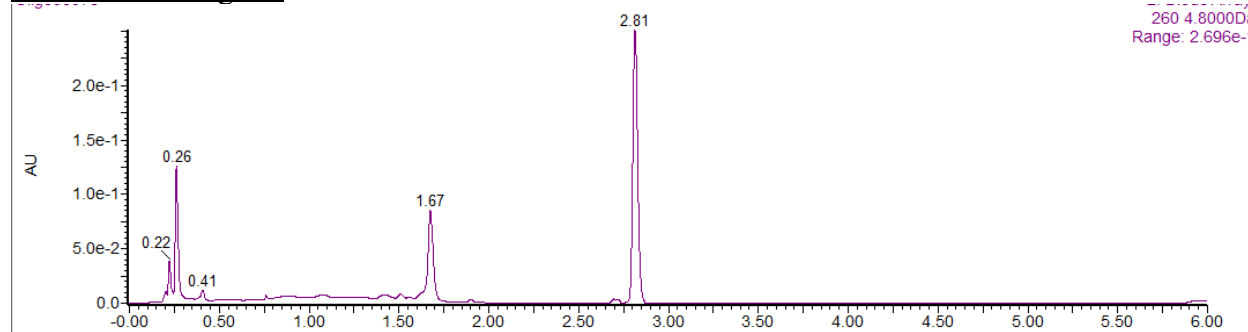

Mass Spectrum (RT= 2.81 min)

4.31e5

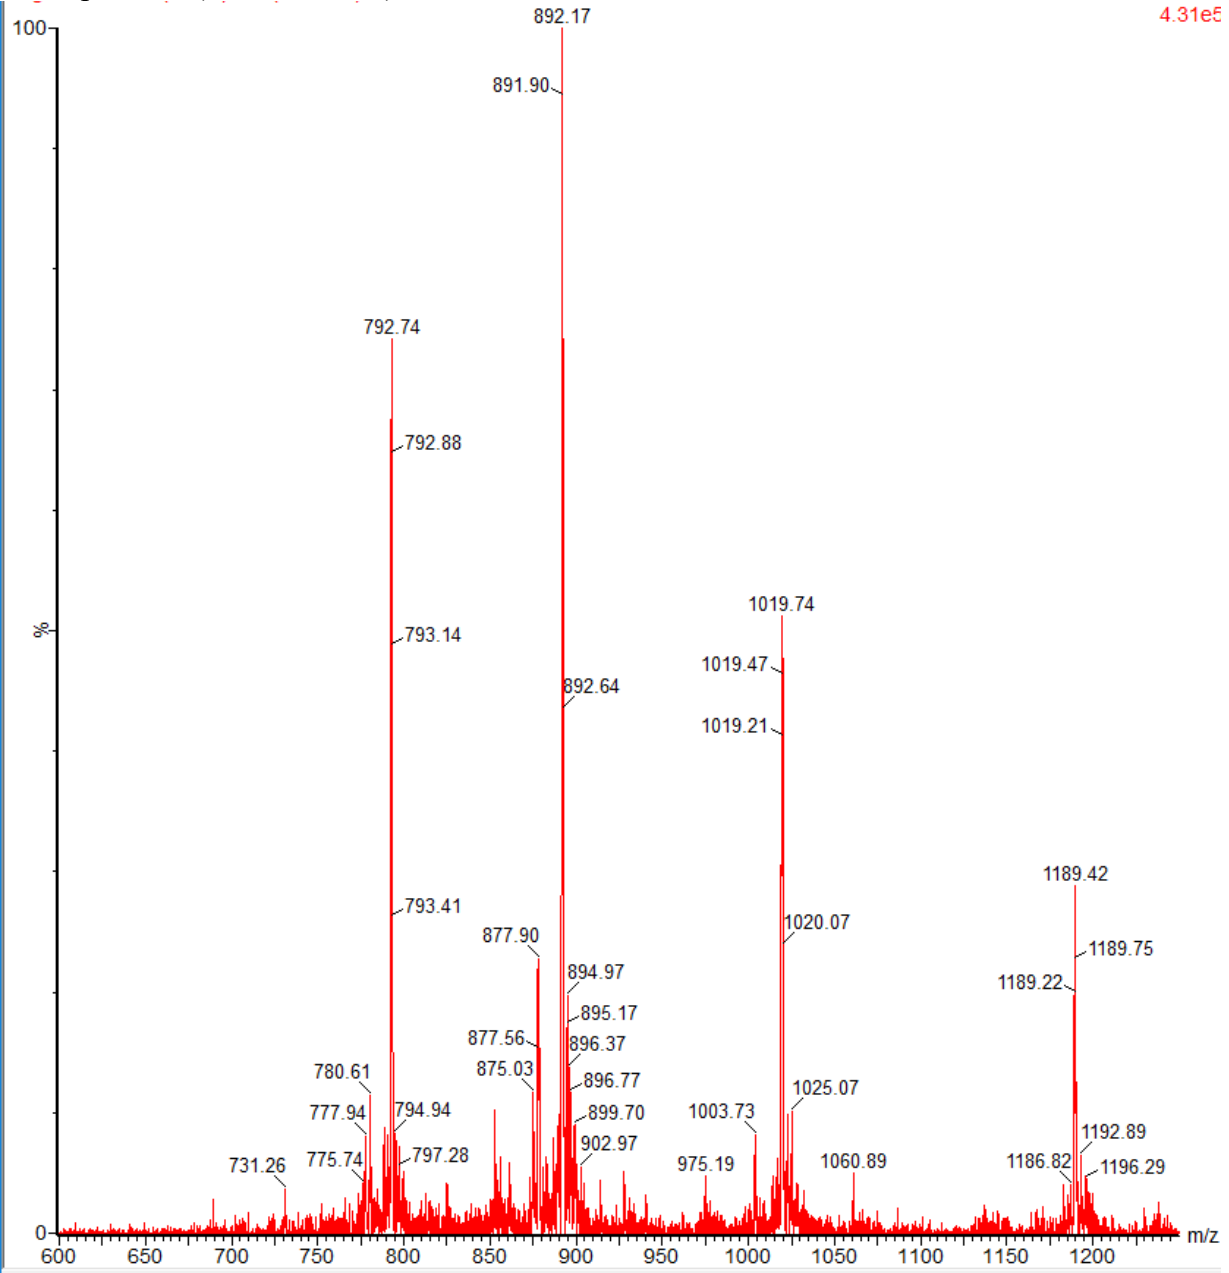

# Deconvoluted Mass Spectrum

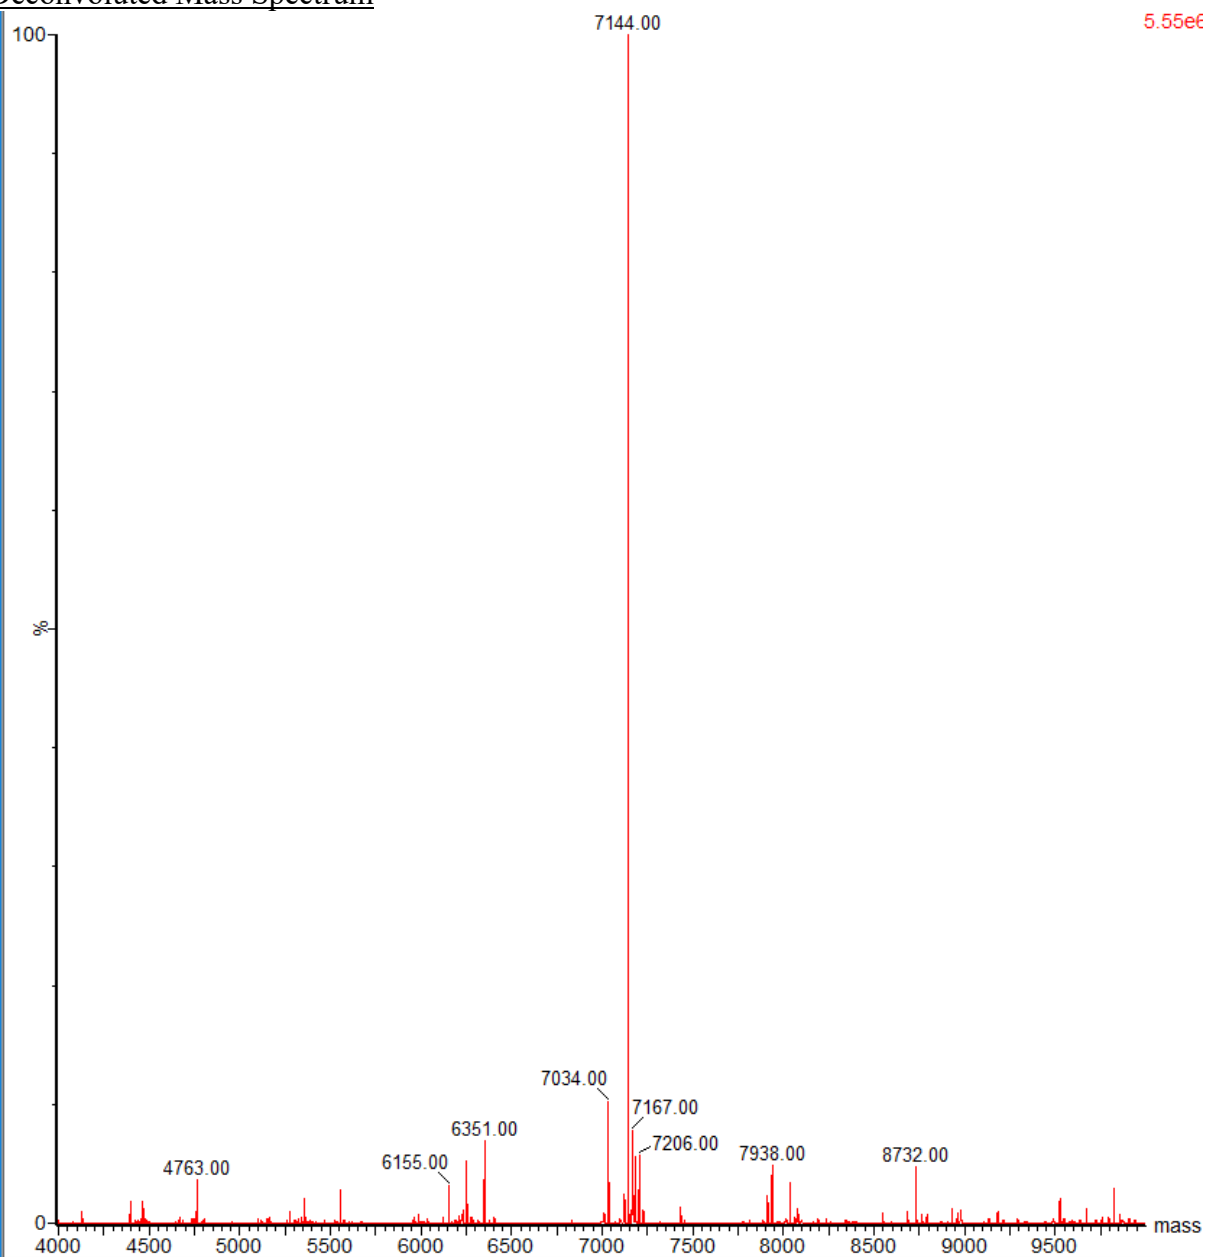

## LCMS Characterization of 12

Produced from **2** by General Procedure **2** (reaction run at 45°C):

Using **Ψ-8**

Yield (A260): 62%

Expected Mass: 7144.83

Expected (M-6)/6 Ion: 1189.8

Found Deconvoluted Mass: 7144.0

Found (M-6)/6 Ion: 1189.4

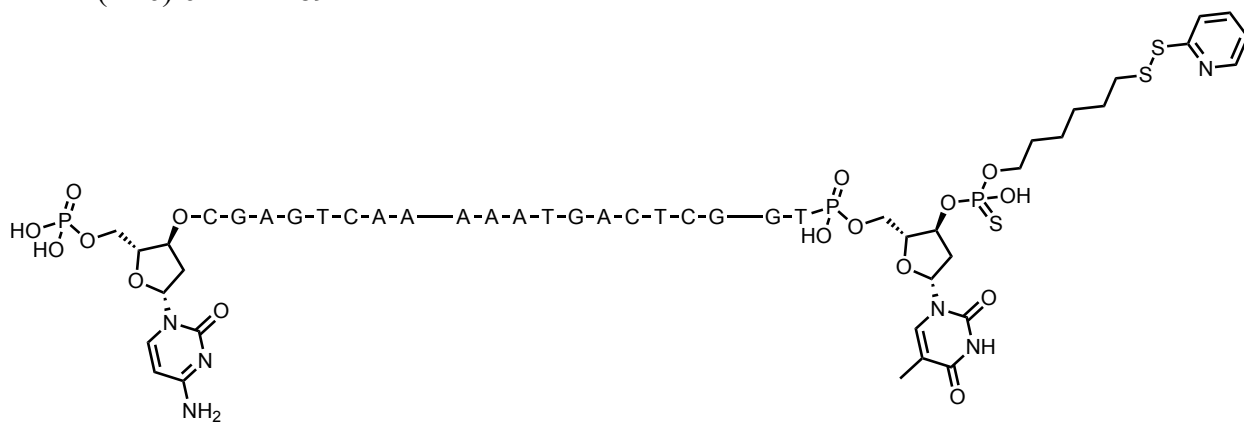

Exact Mass: 7141.15  
Molecular Weight: 7144.83

## A260 Chromatogram

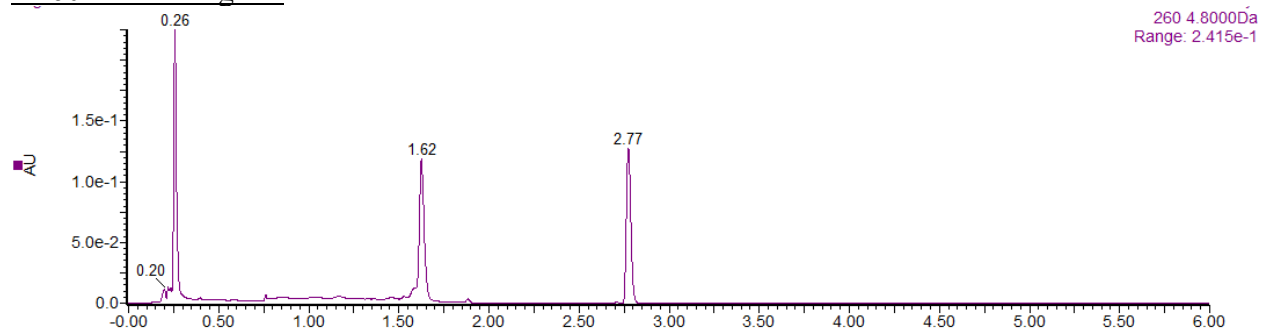



Mass Spectrum (RT= 2.77 min)

4.31e5

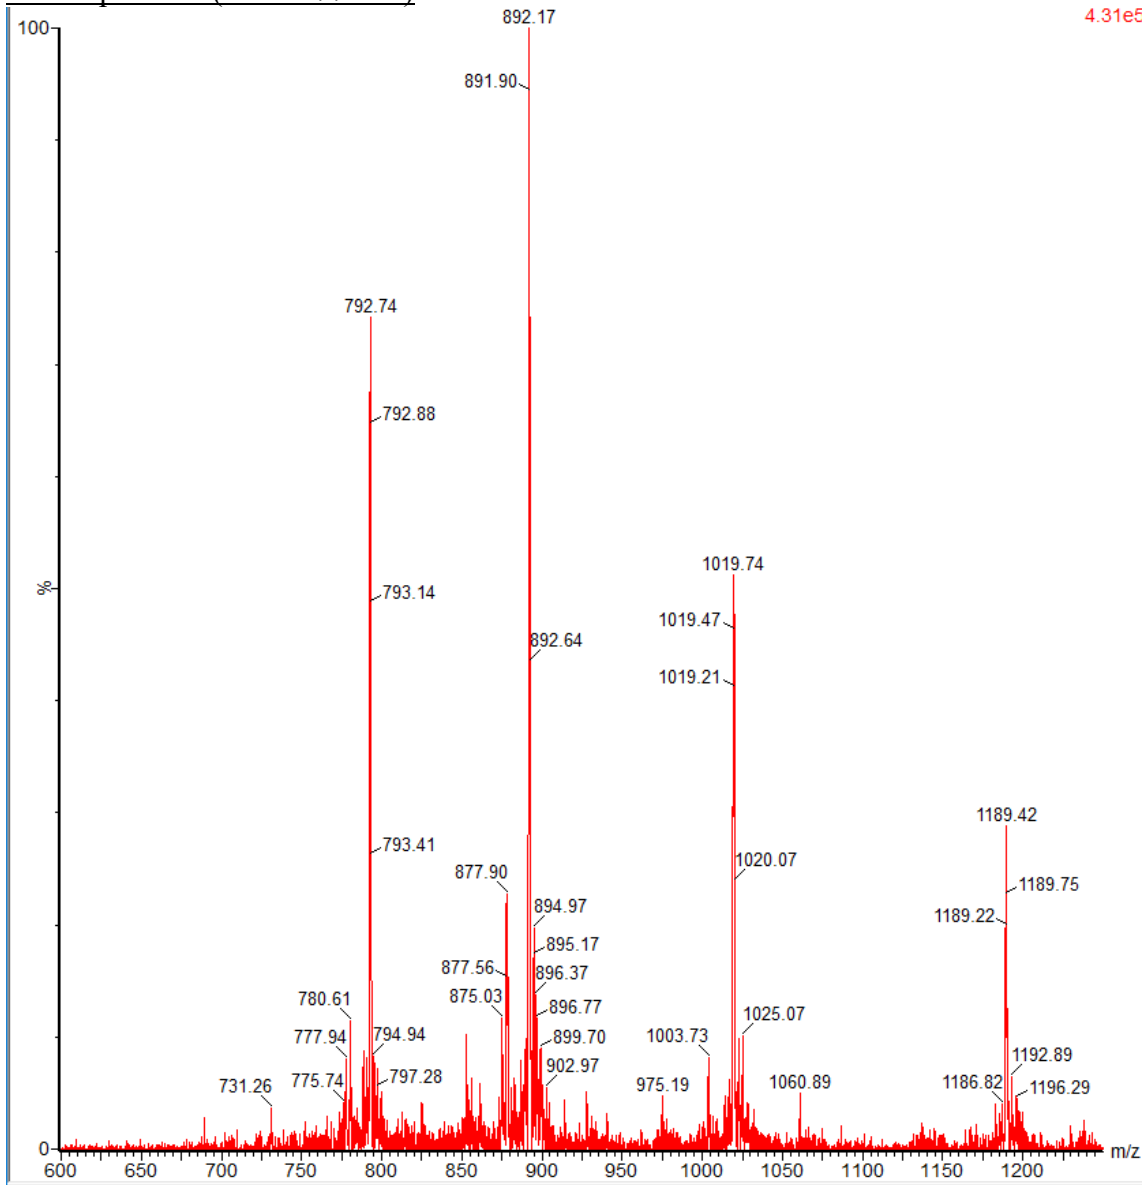

# Deconvoluted Mass Spectrum

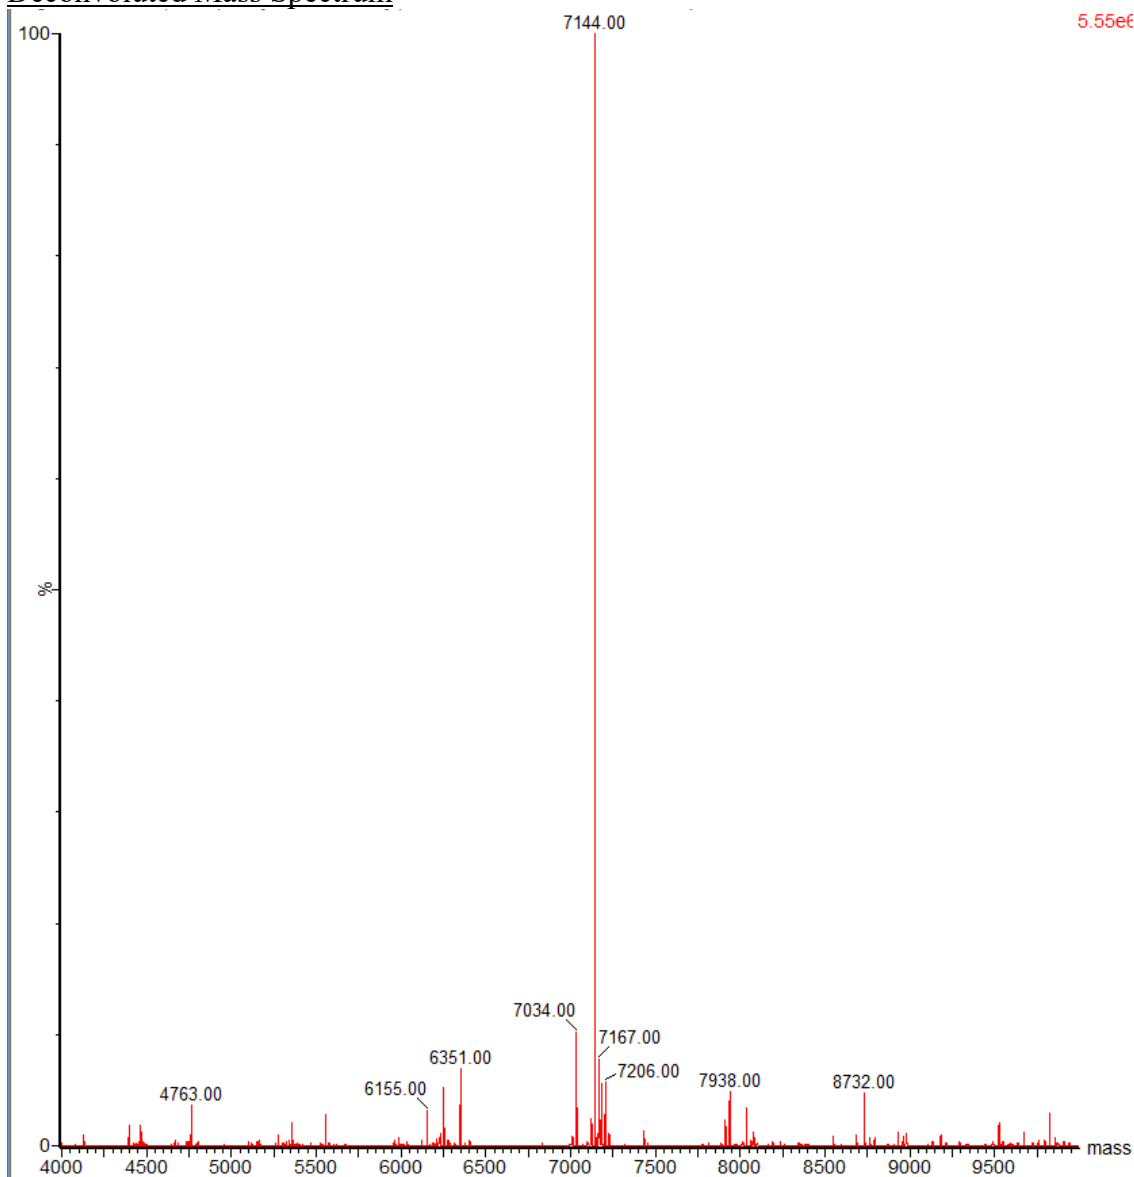

## LCMS Characterization of 13

Using  $\Psi$ -19

Produced from **1** by General Procedure **2** (Reaction Run at 37°C):

Yield (A260): 84%

Expected Mass: 7166.76

Expected (M-6)/6 Ion: 1193.5

Found Deconvoluted Mass: 7166.00

Found (M-6)/6 Ion: 1193.42

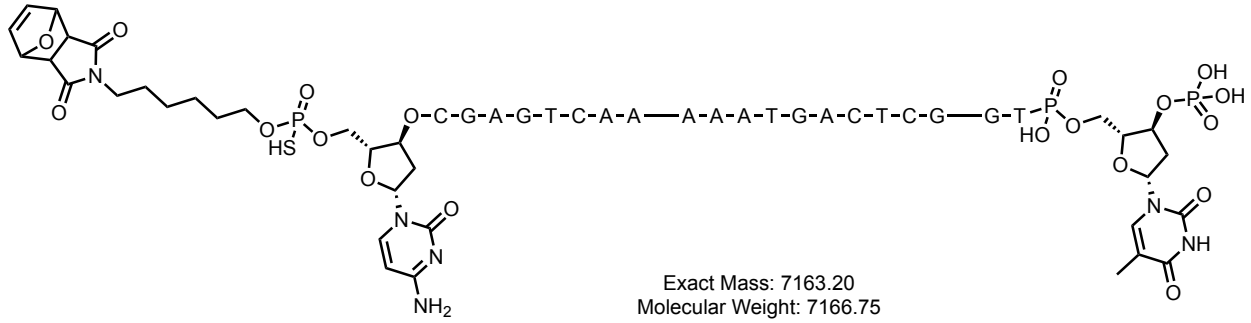

## A260 Chromatogram

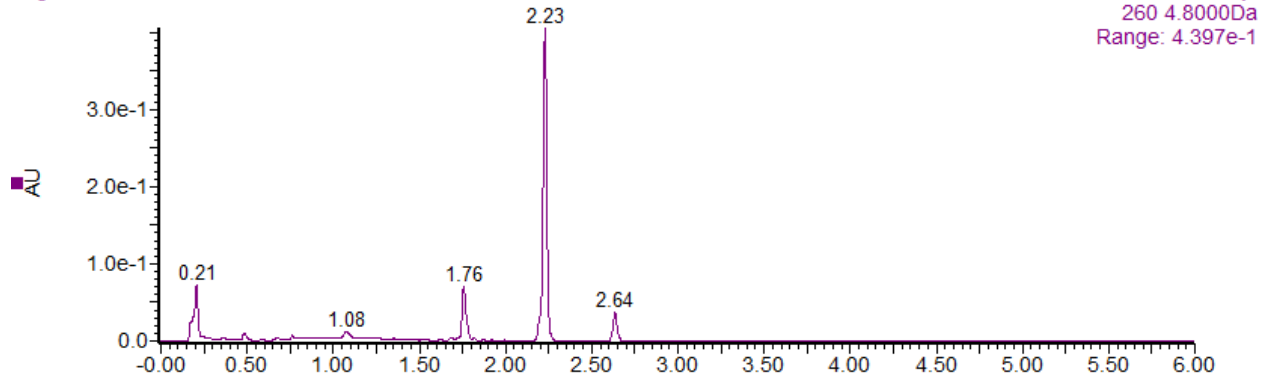

## TIC

Oligo03496

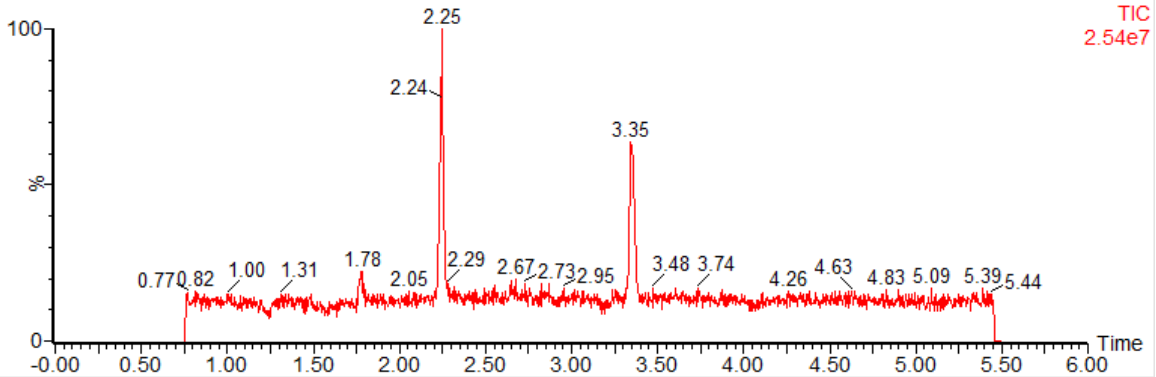

Mass Spectrum (RT= 2.23 min)

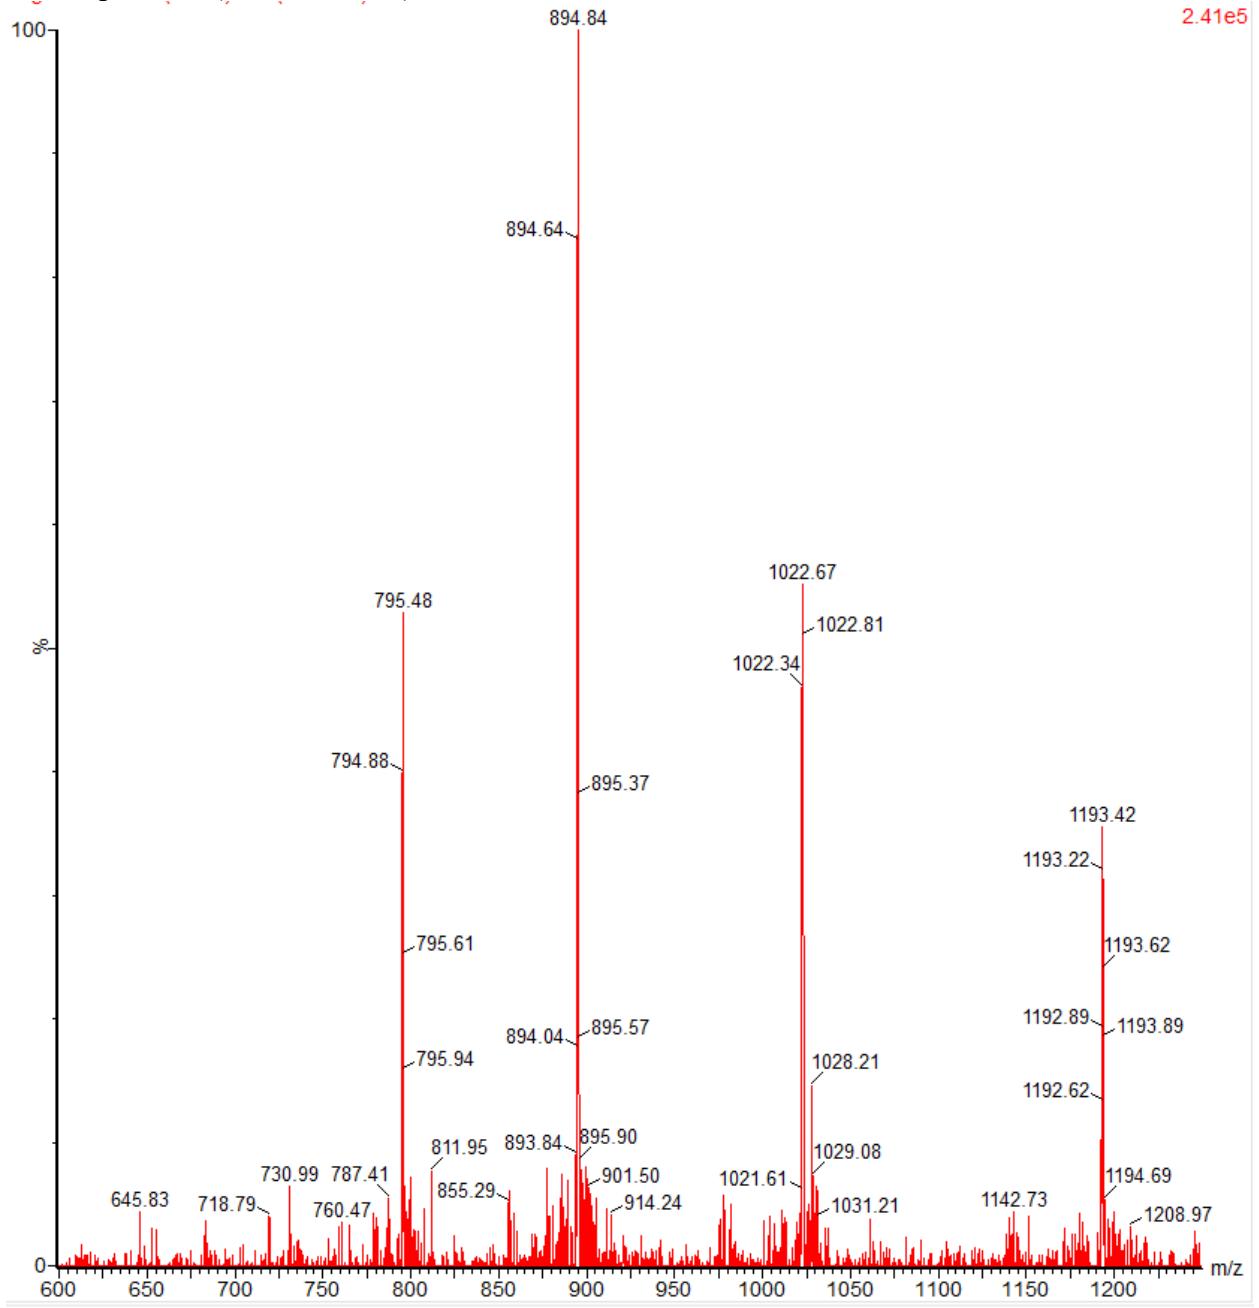

2.41e5

# Deconvoluted Mass Spectrum

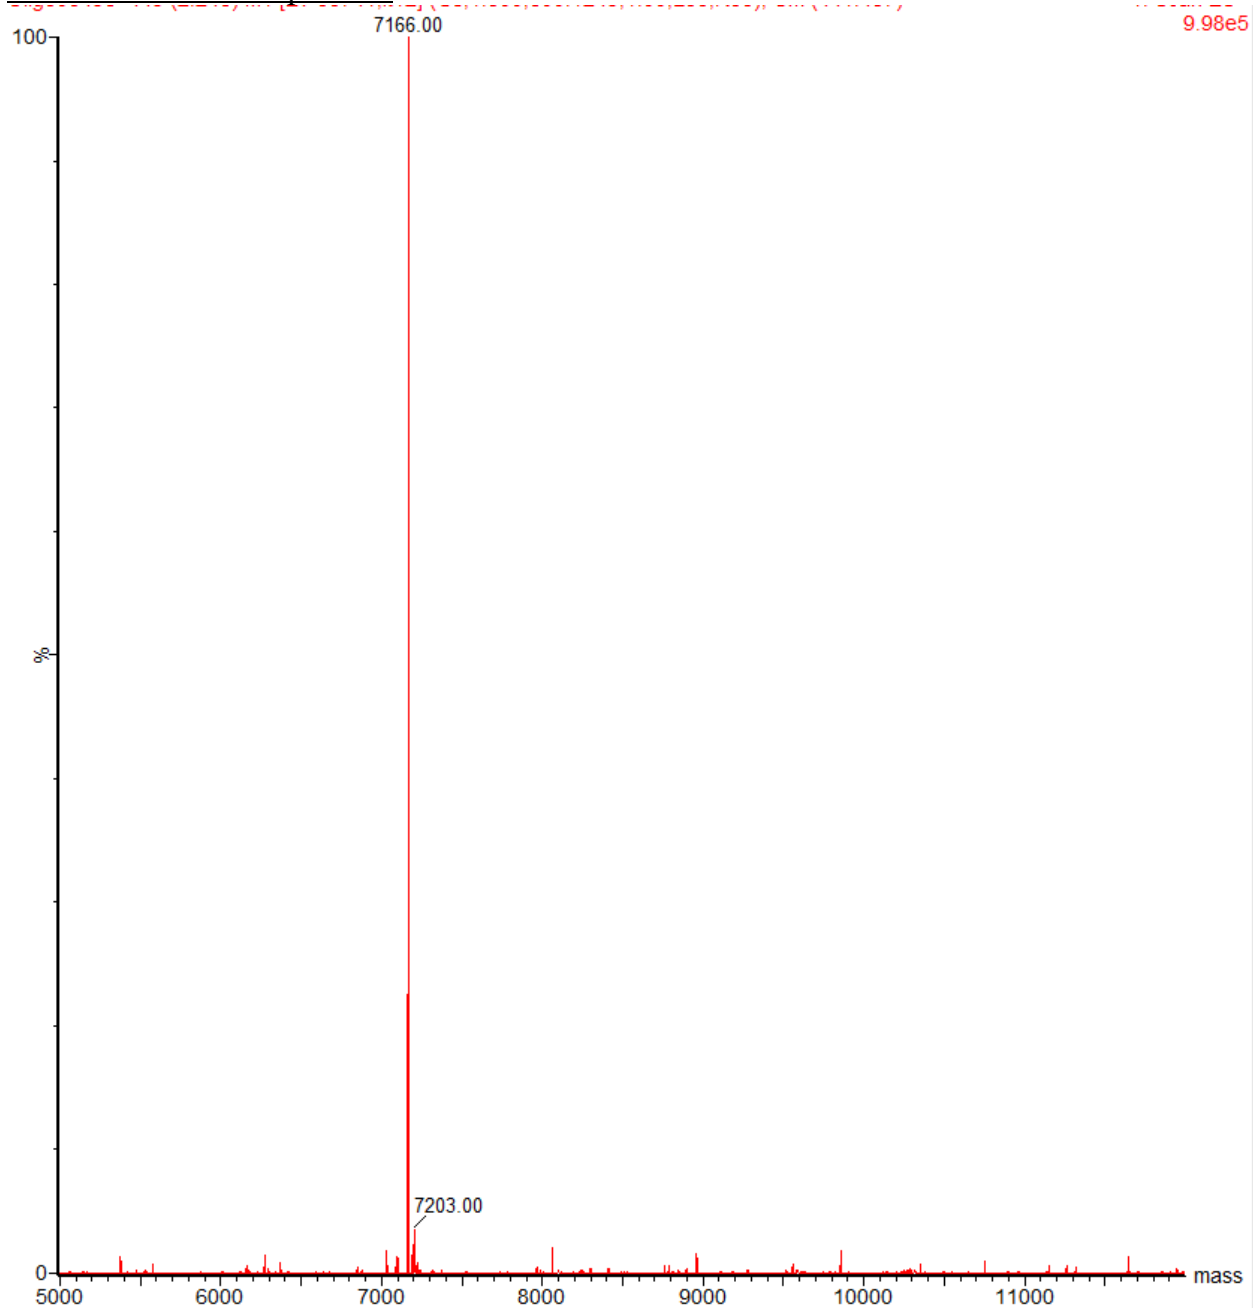

## LCMS Characterization of 14

Using  $\Psi$ -19

Produced from **2** by General Procedure **2** (Reaction Run at 37°C):

Yield (A260): 62%

Expected Mass: 7166.76

Expected (M-6)/6 Ion: 1193.5

Found Deconvoluted Mass: 7166.0

Found (M-6)/6 Ion: 1193.82

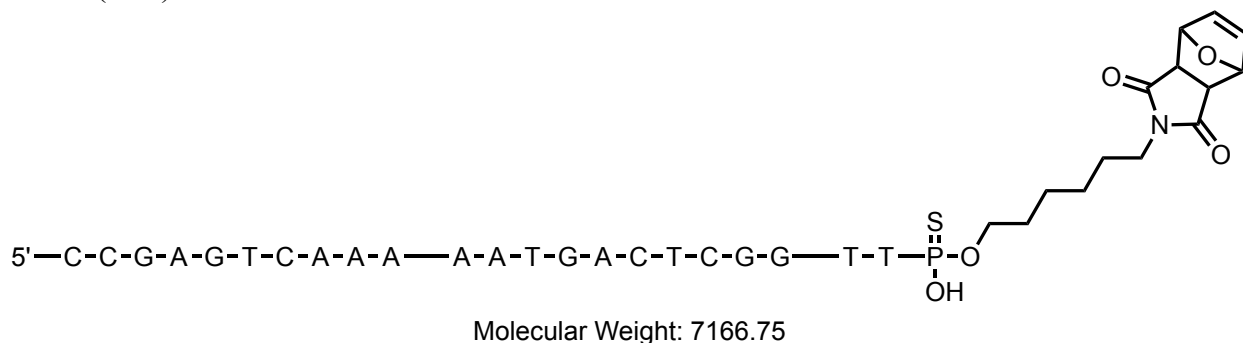

### A260 Chromatogram

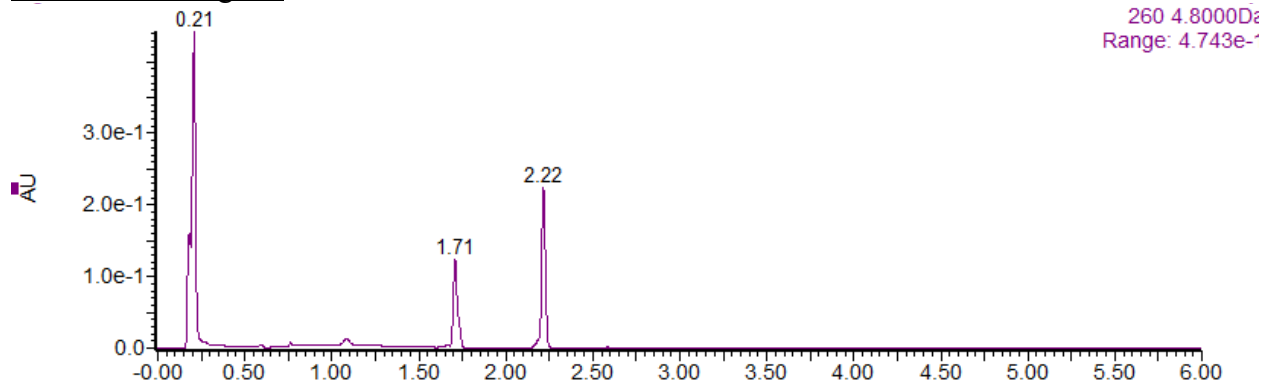

### TIC

Oligo03498

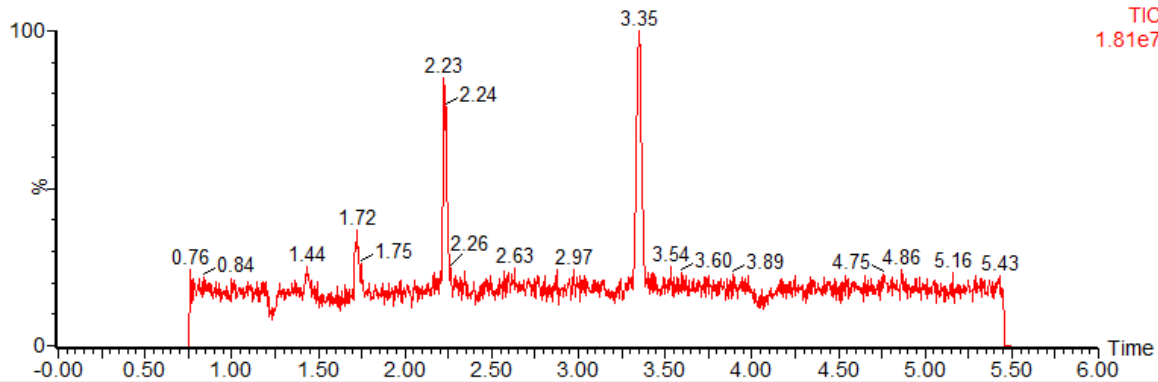

Mass Spectrum (RT= 2.22 min)

2.06e5

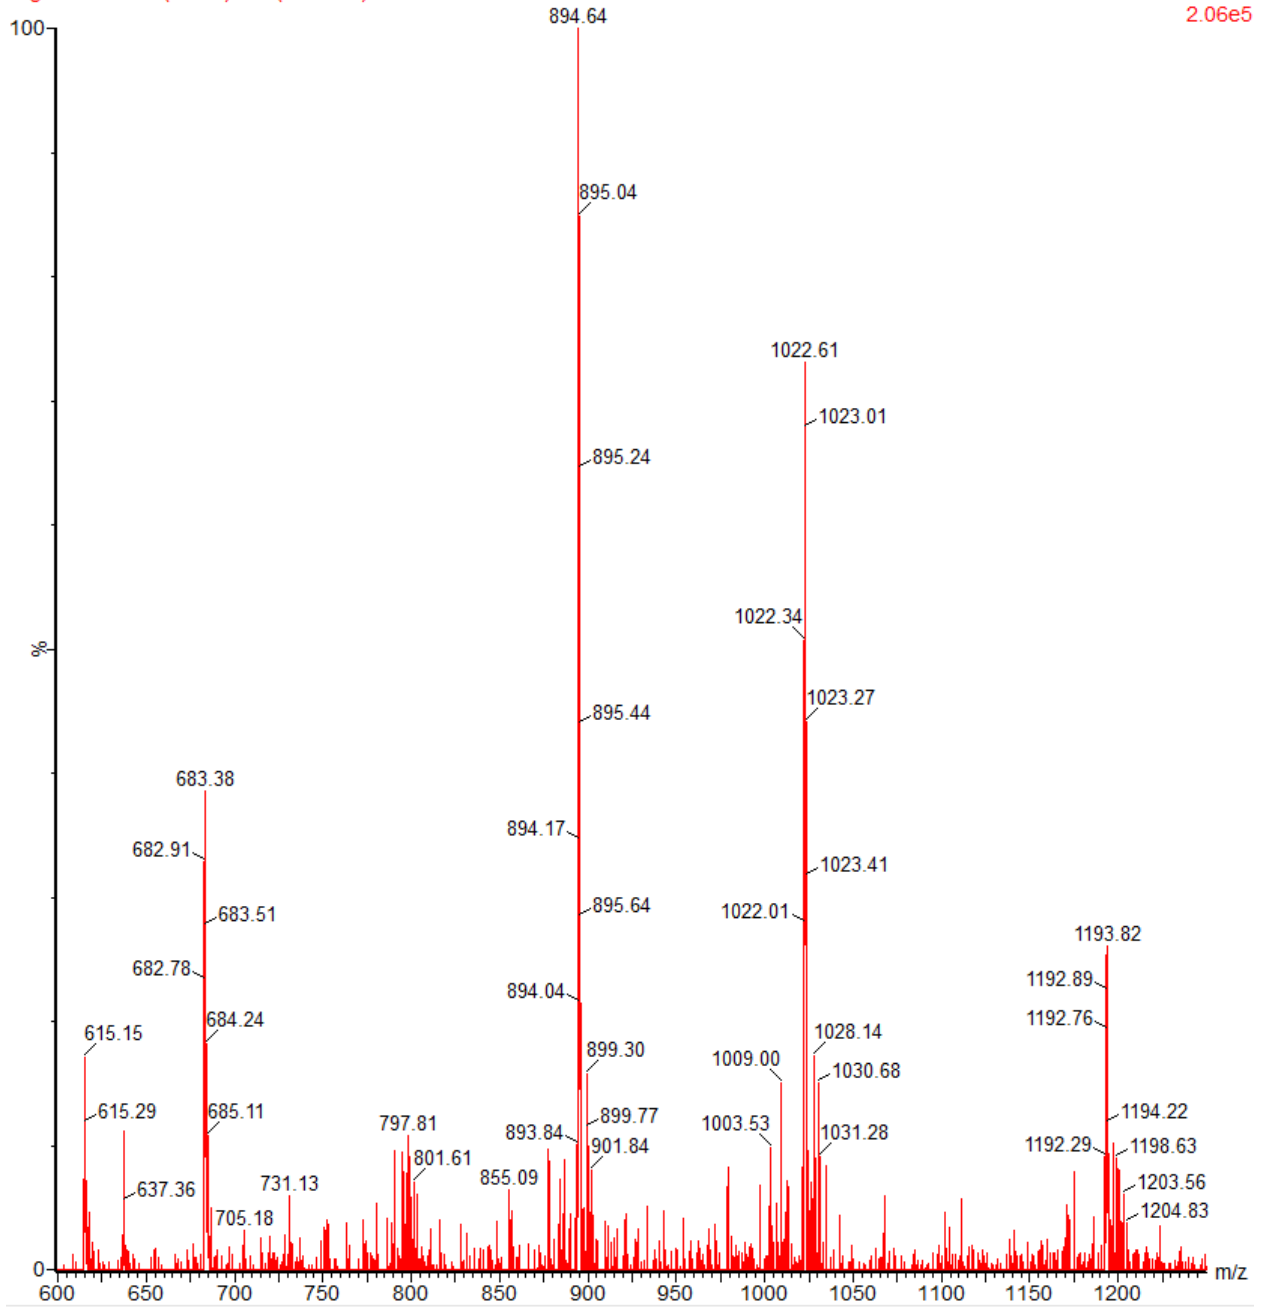

# Deconvoluted Mass Spectrum

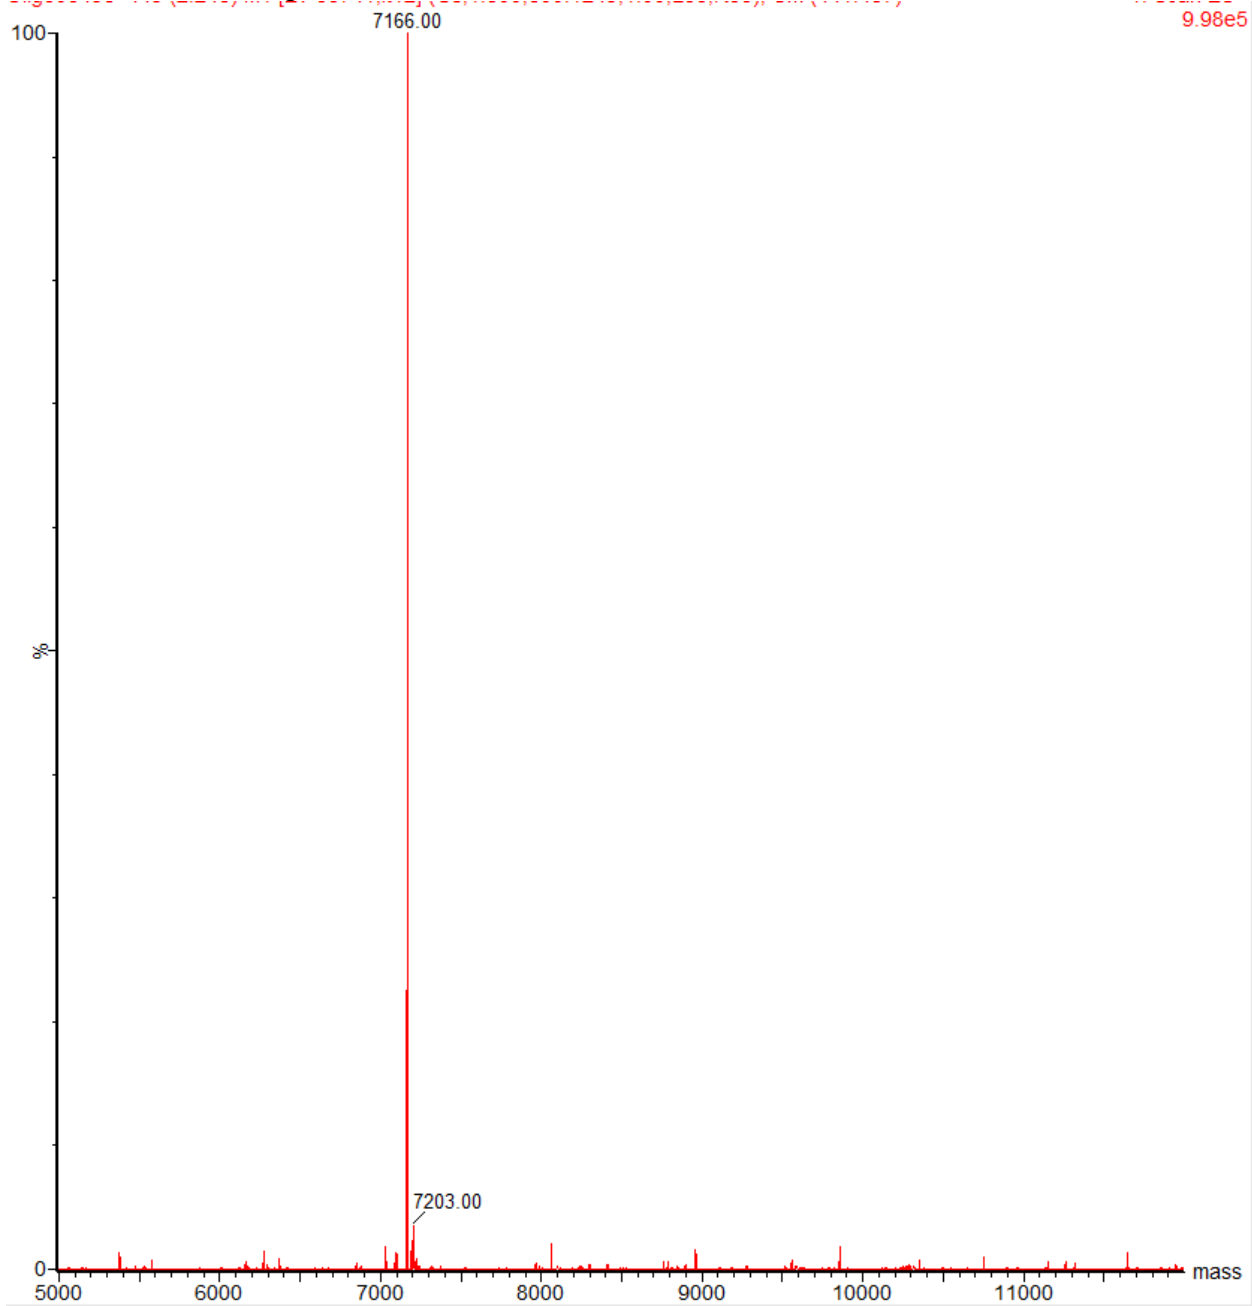



## LCMS Characterization of 15

Produced from **1** by General Procedure **2**:

Using **Ψ-12**

Yield (A260): 81%

Expected Mass: 7025.6

Expected (M-6)/6 Ion: 1169.36

Found Deconvoluted Mass: 7026.0

Found (M-6)/6 Ion: 1169.41

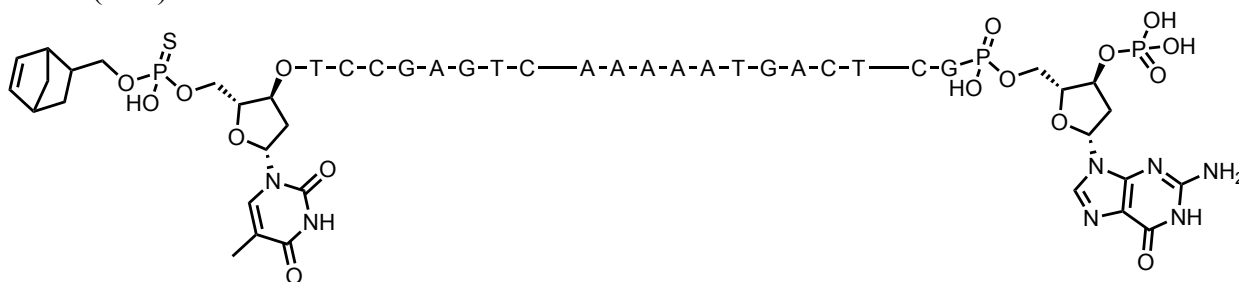

Exact Mass: 7022.16  
Molecular Weight: 7025.63

### A260 Chromatogram

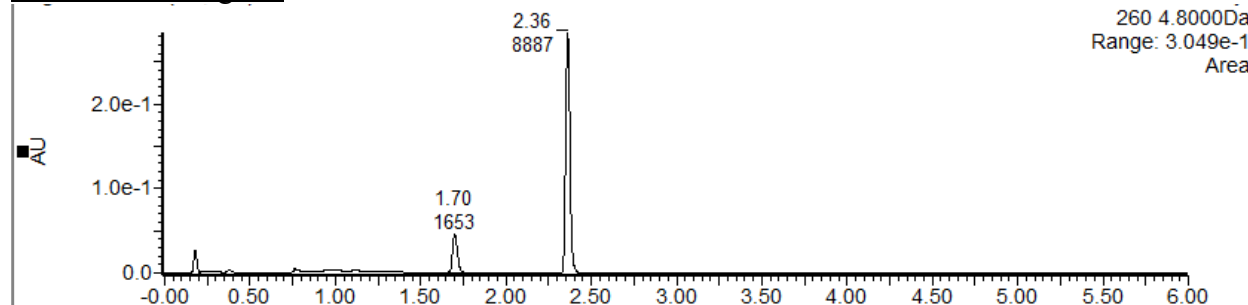

Mass Spectrum (RT= 2.36 min)

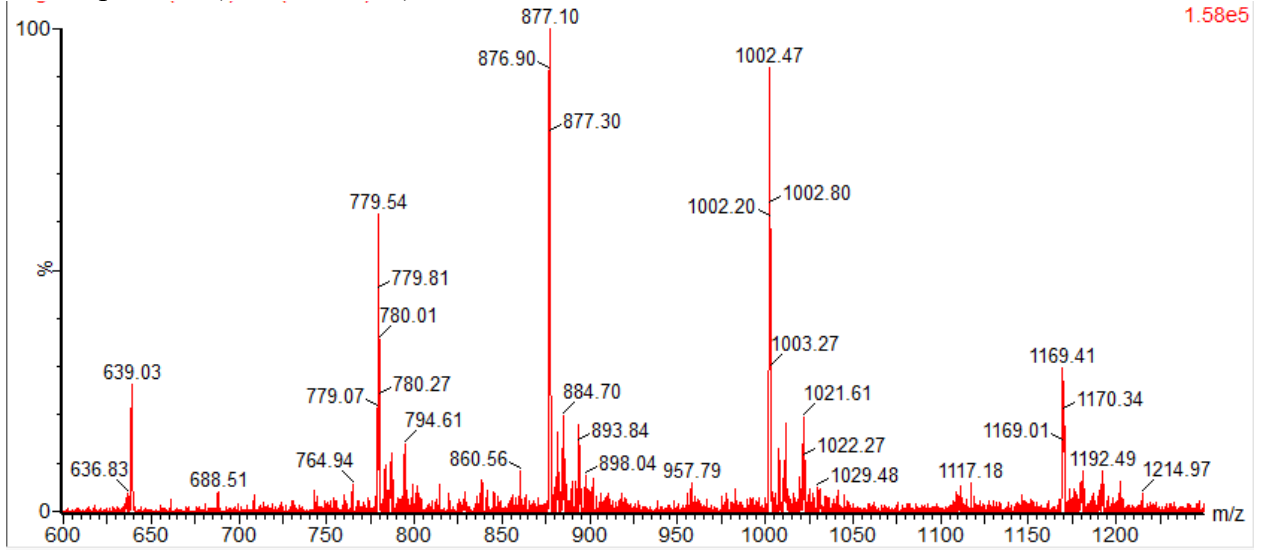

Deconvoluted Mass Spectrum

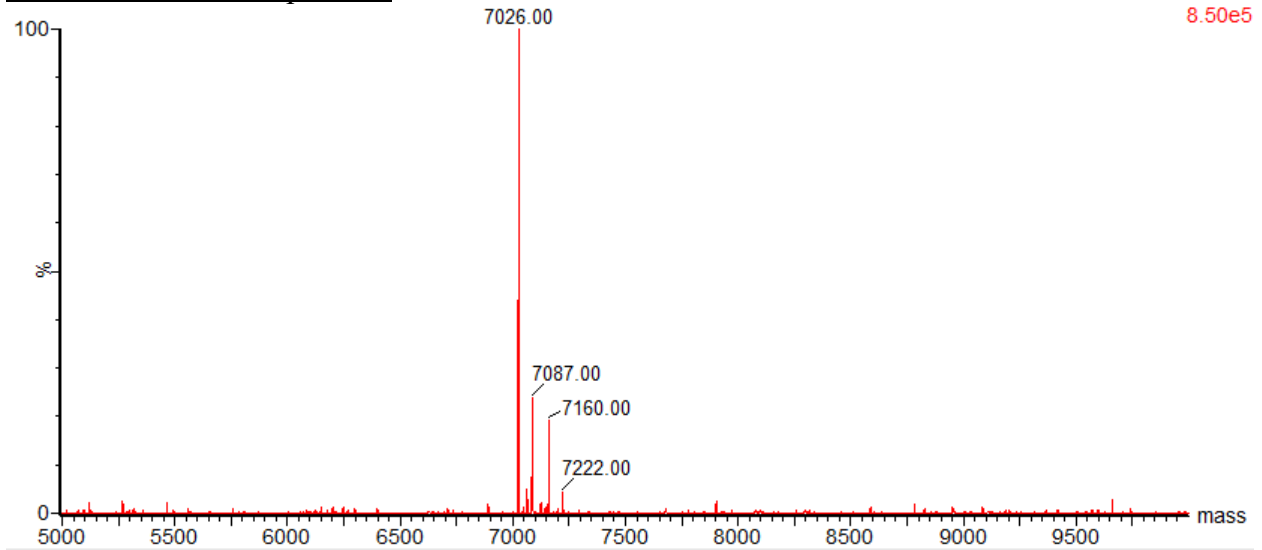

## LCMS Characterization of 16

Produced from **2** by General Procedure **2**:

Using **Ψ-12**

Yield (A260): 68%

Expected Mass: 7025.63

Expected (M-6)/6 Ion: 1169.94

Found Deconvoluted Mass: 7025.0

Found (M-6)/6 Ion: 1169.74

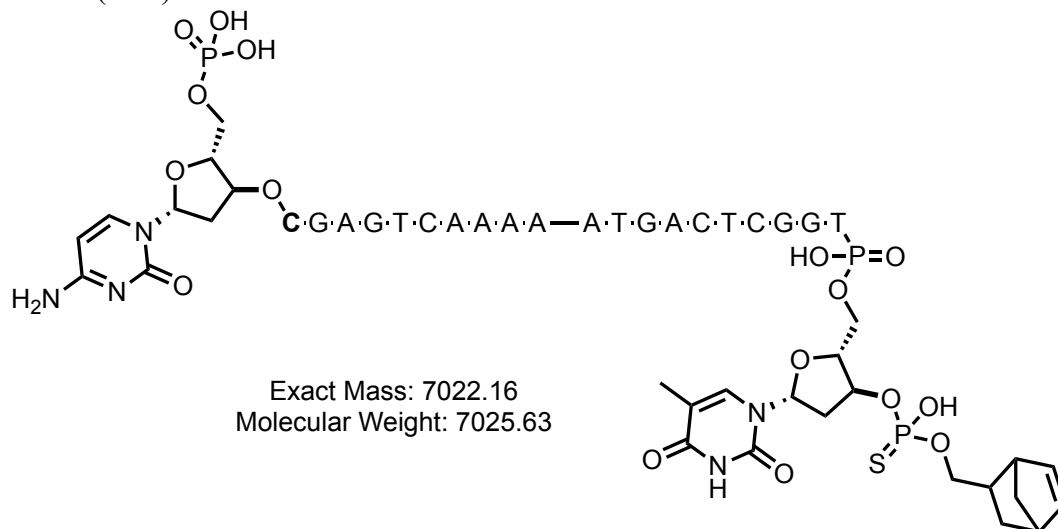

### A260 Chromatogram

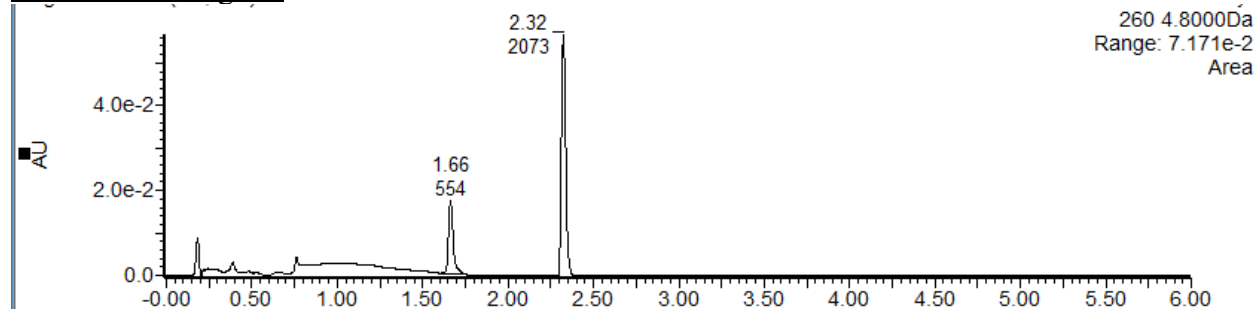

Mass Spectrum (RT= 2.32 min)

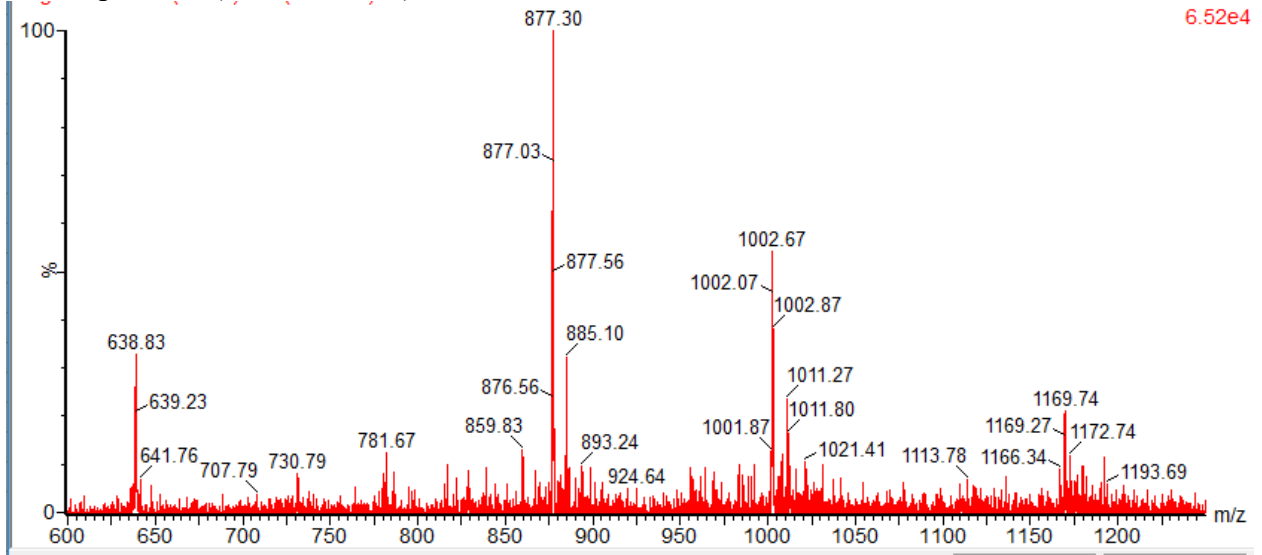

Deconvoluted Mass Spectrum

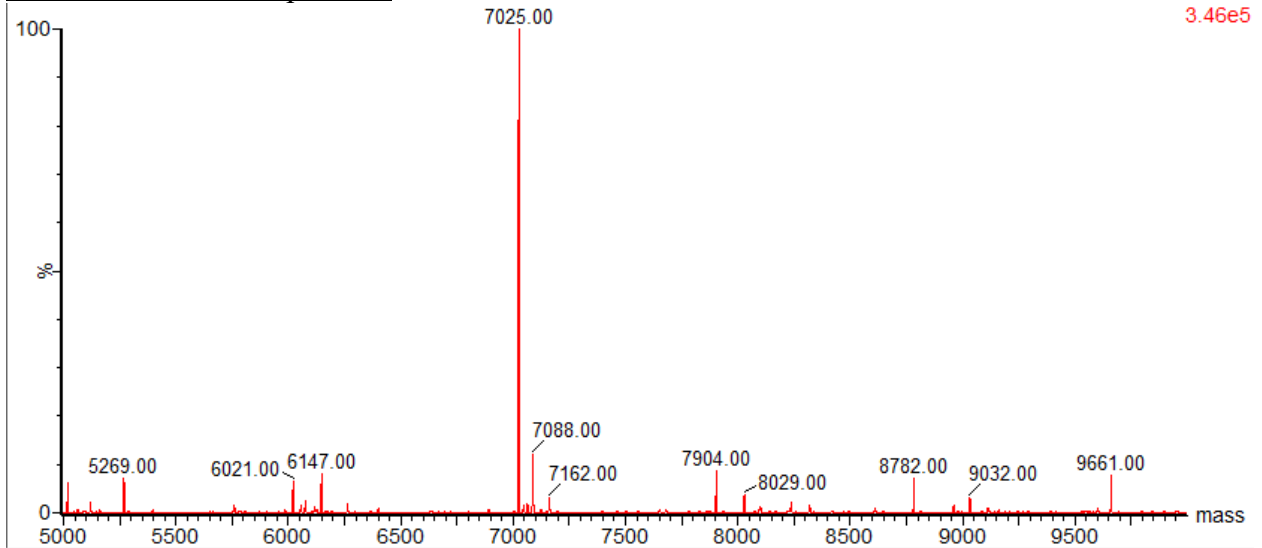

## LCMS Characterization of 17

Produced from **1** by General Procedure **2**:

Using **Ψ-13**

Yield (A260): 51%

Expected Mass: 7278.91

Expected (M-6)/6 Ion: 1211.5

Found Deconvoluted Mass: 7279.0

Found (M-6)/6 Ion: 1211.7

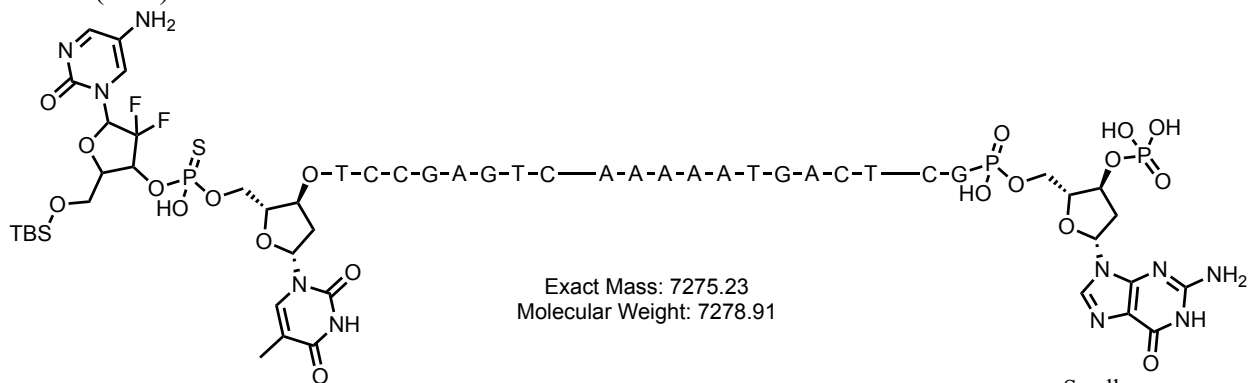

### A260 Chromatogram

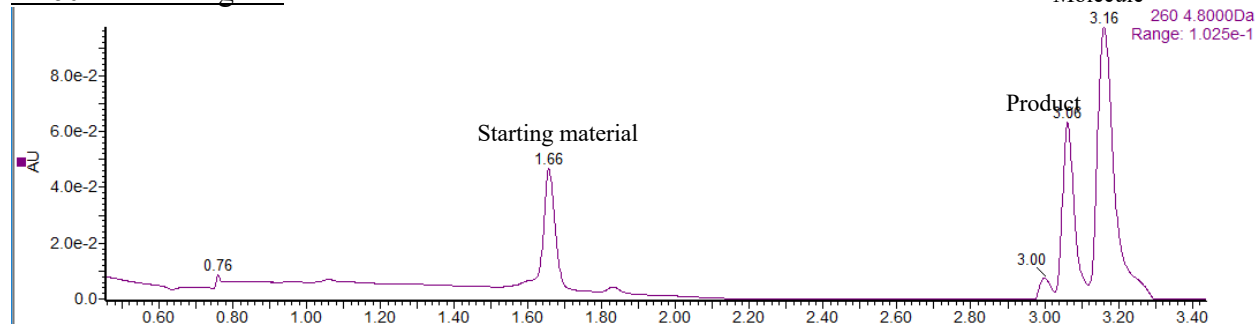

Mass Spectrum (RT= 3.06 min)

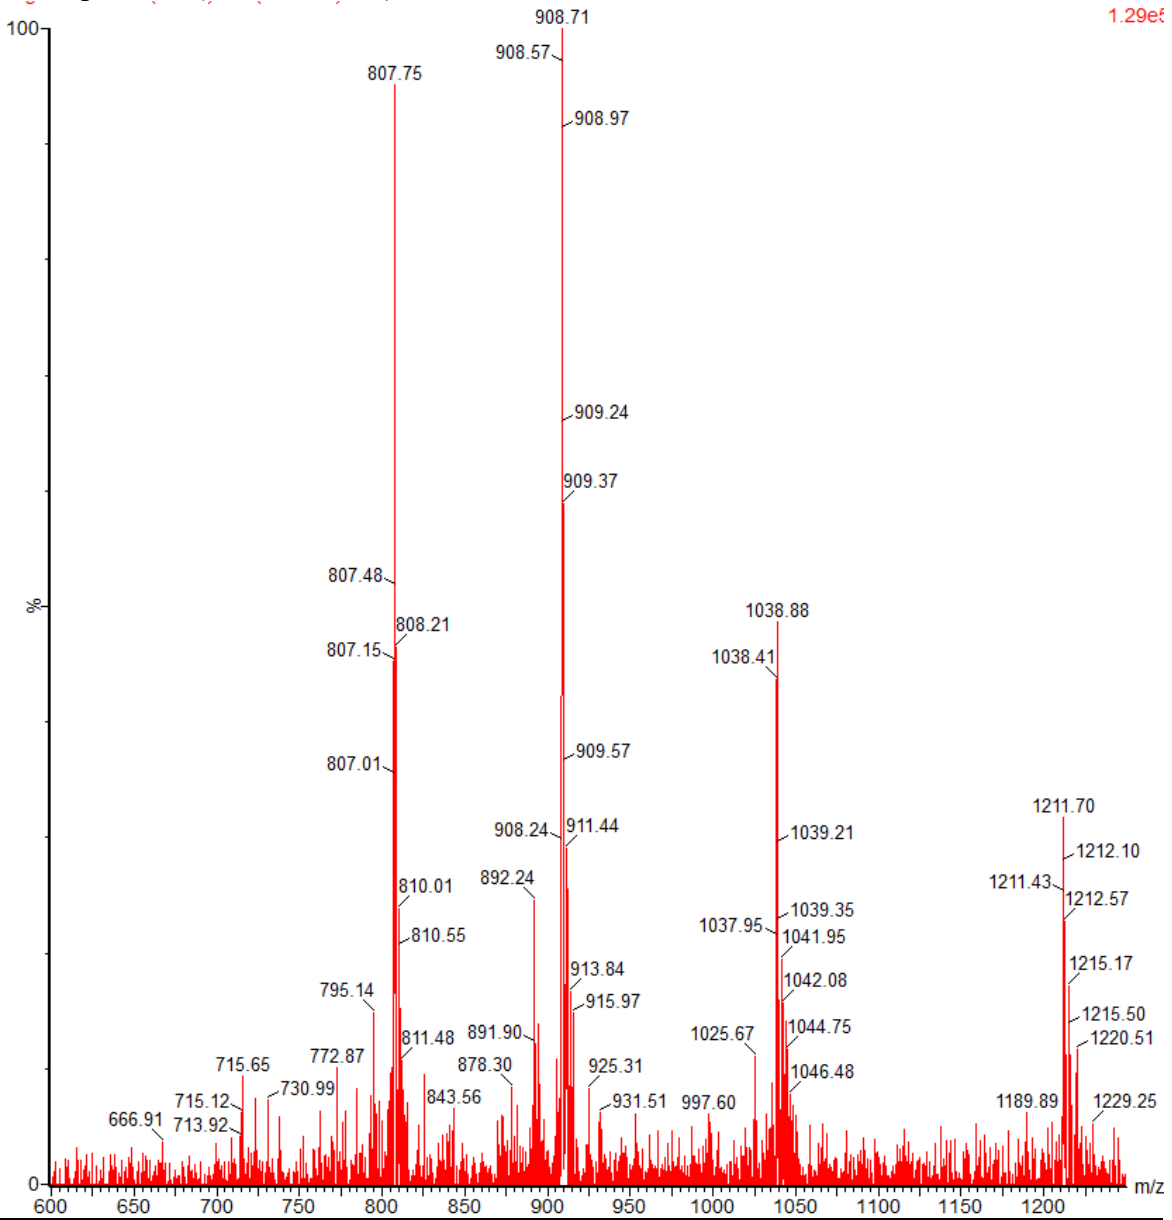

# Deconvoluted Mass Spectrum

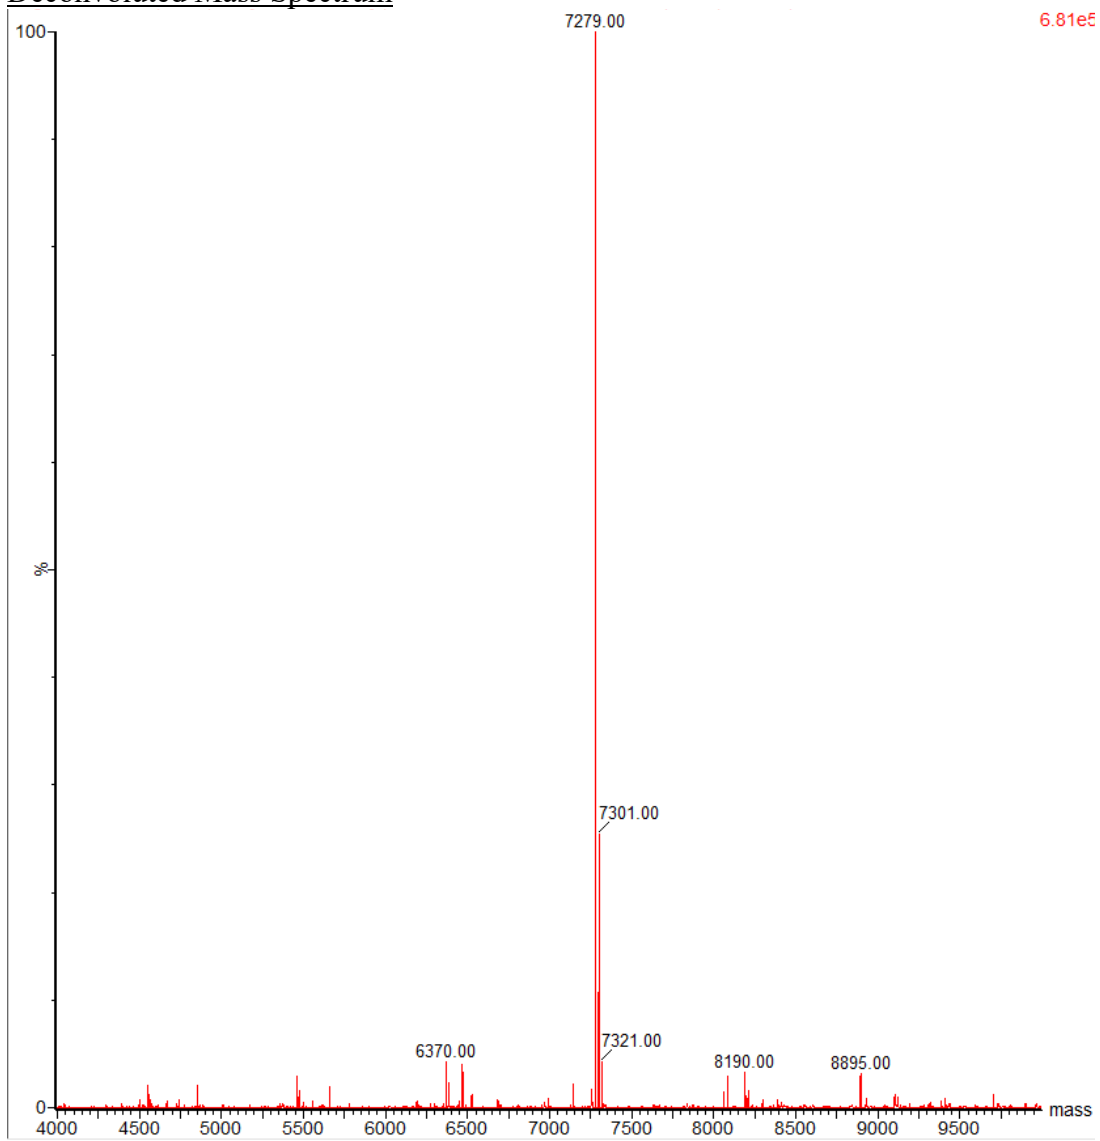

## LCMS Characterization of 18

Produced from **2** by General Procedure **2**:

Using **Ψ-13**

Yield (A260): 45%

Expected Mass: 7278.23

Expected (M-6)/6 Ion: 1211.5

Found Deconvoluted Mass: 7279.00

Found (M-6)/6 Ion: 1211.77

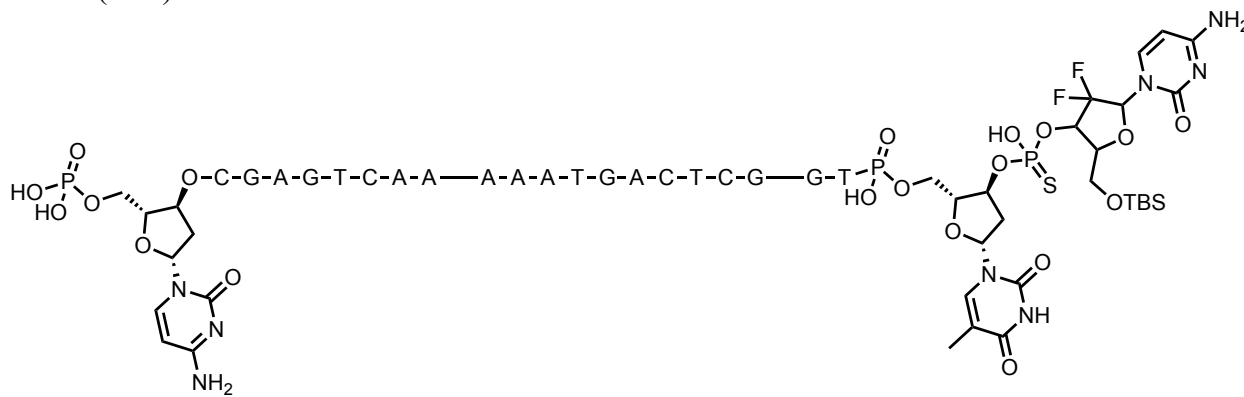

Exact Mass: 7275.23  
Molecular Weight: 7278.91

### A260 Chromatogram

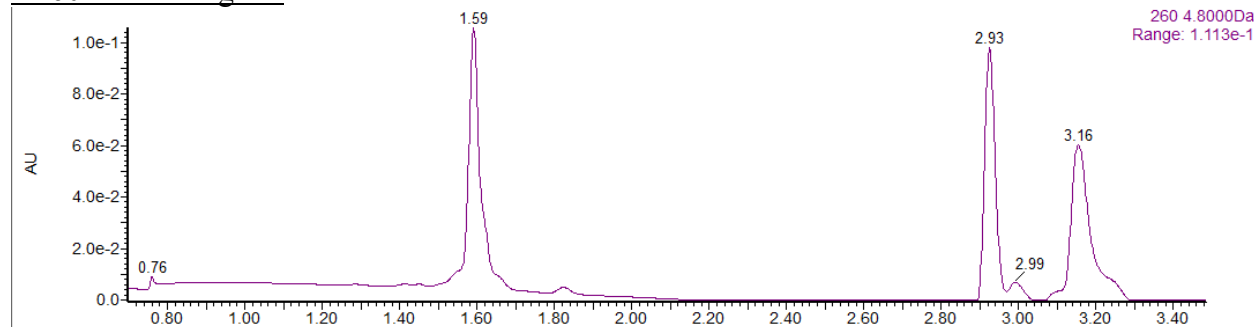



Mass Spectrum (RT= 2.93 min)

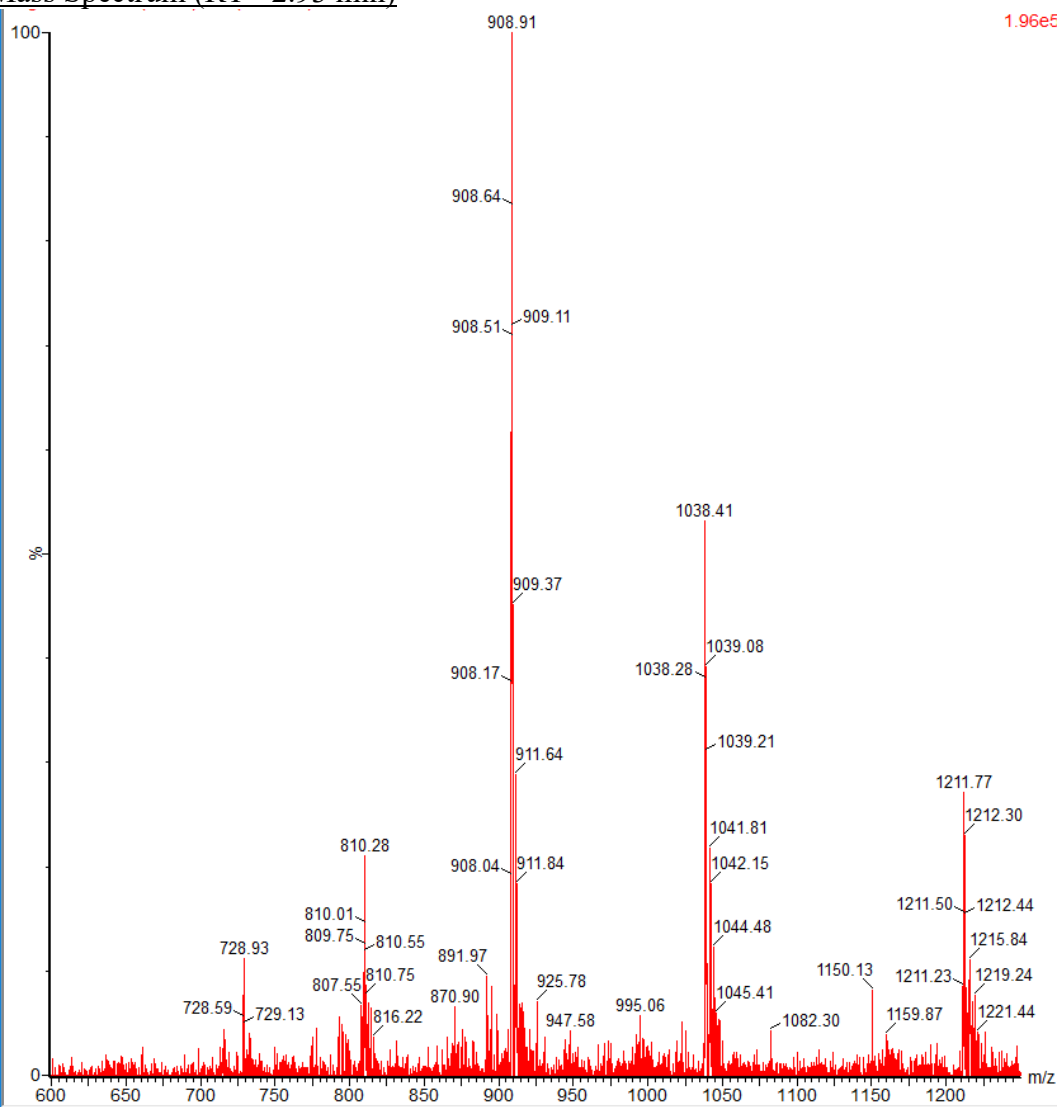

# Deconvoluted Mass Spectrum

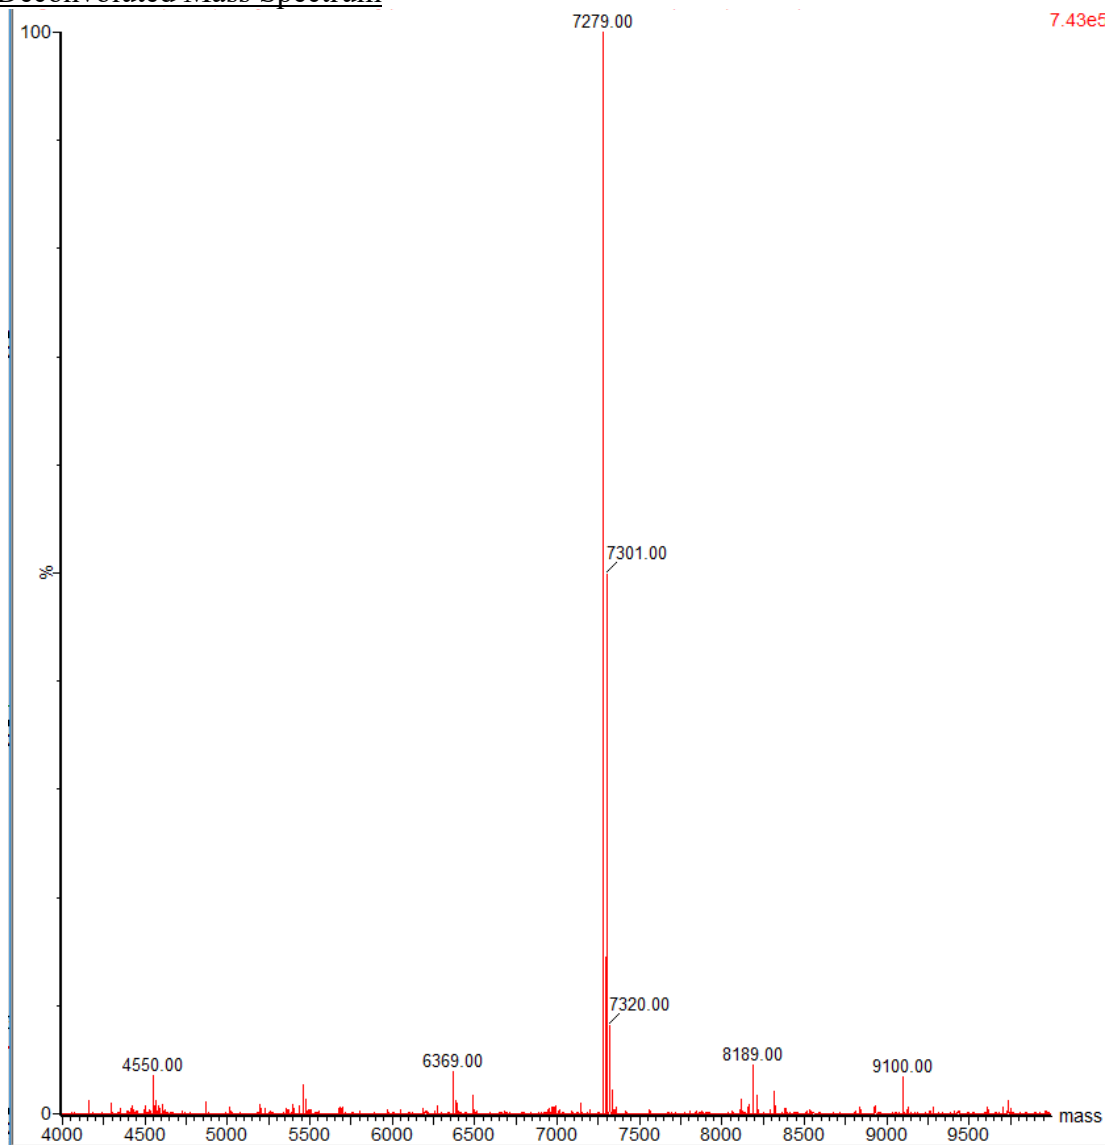

## LCMS Characterization of 19

Using  $\Psi$ -14

Produced from **1** by General Procedure **2** (Reaction run with 75 mM  $\Psi$ -14 and 225 mM DBU):

Yield (A260): 68%

Expected Mass: 6995.11

Expected (M-6)/6 Ion: 1164.9

Found Deconvoluted Mass: 6995.0

Found (M-6)/6 Ion: 1165.0

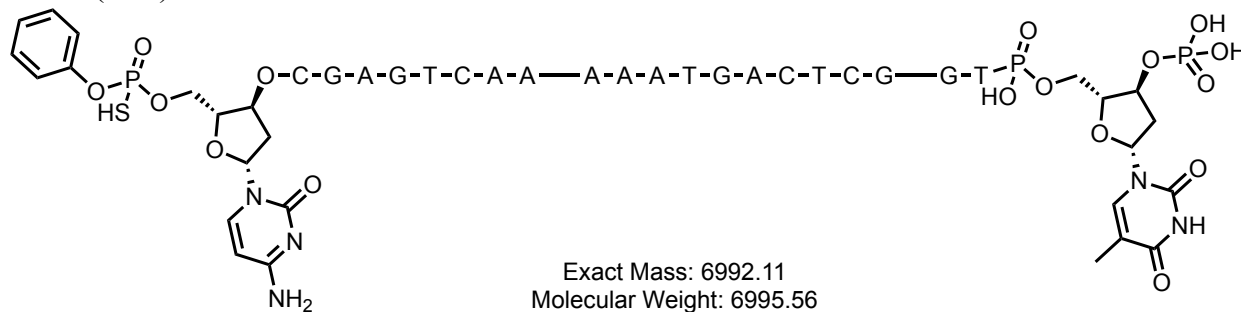

## A260 Chromatogram

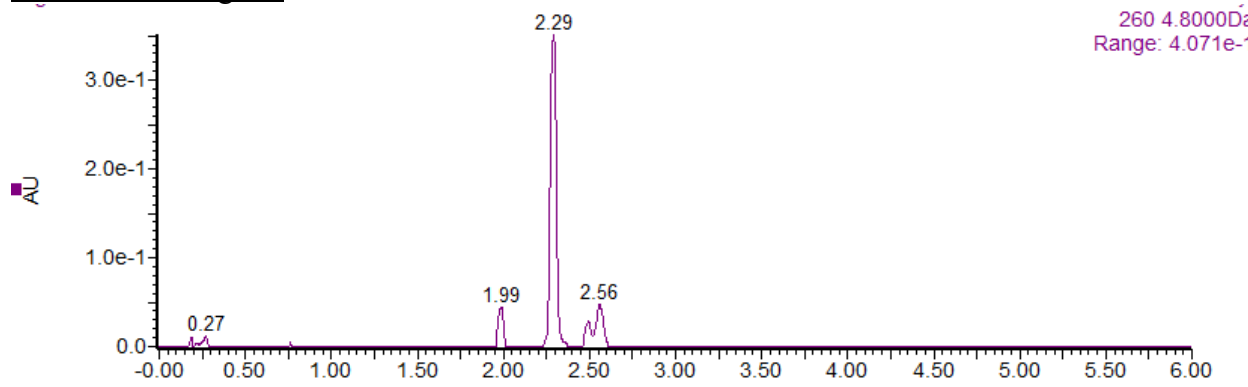

Mass Spectrum (RT= 2.29 min)

3.67e

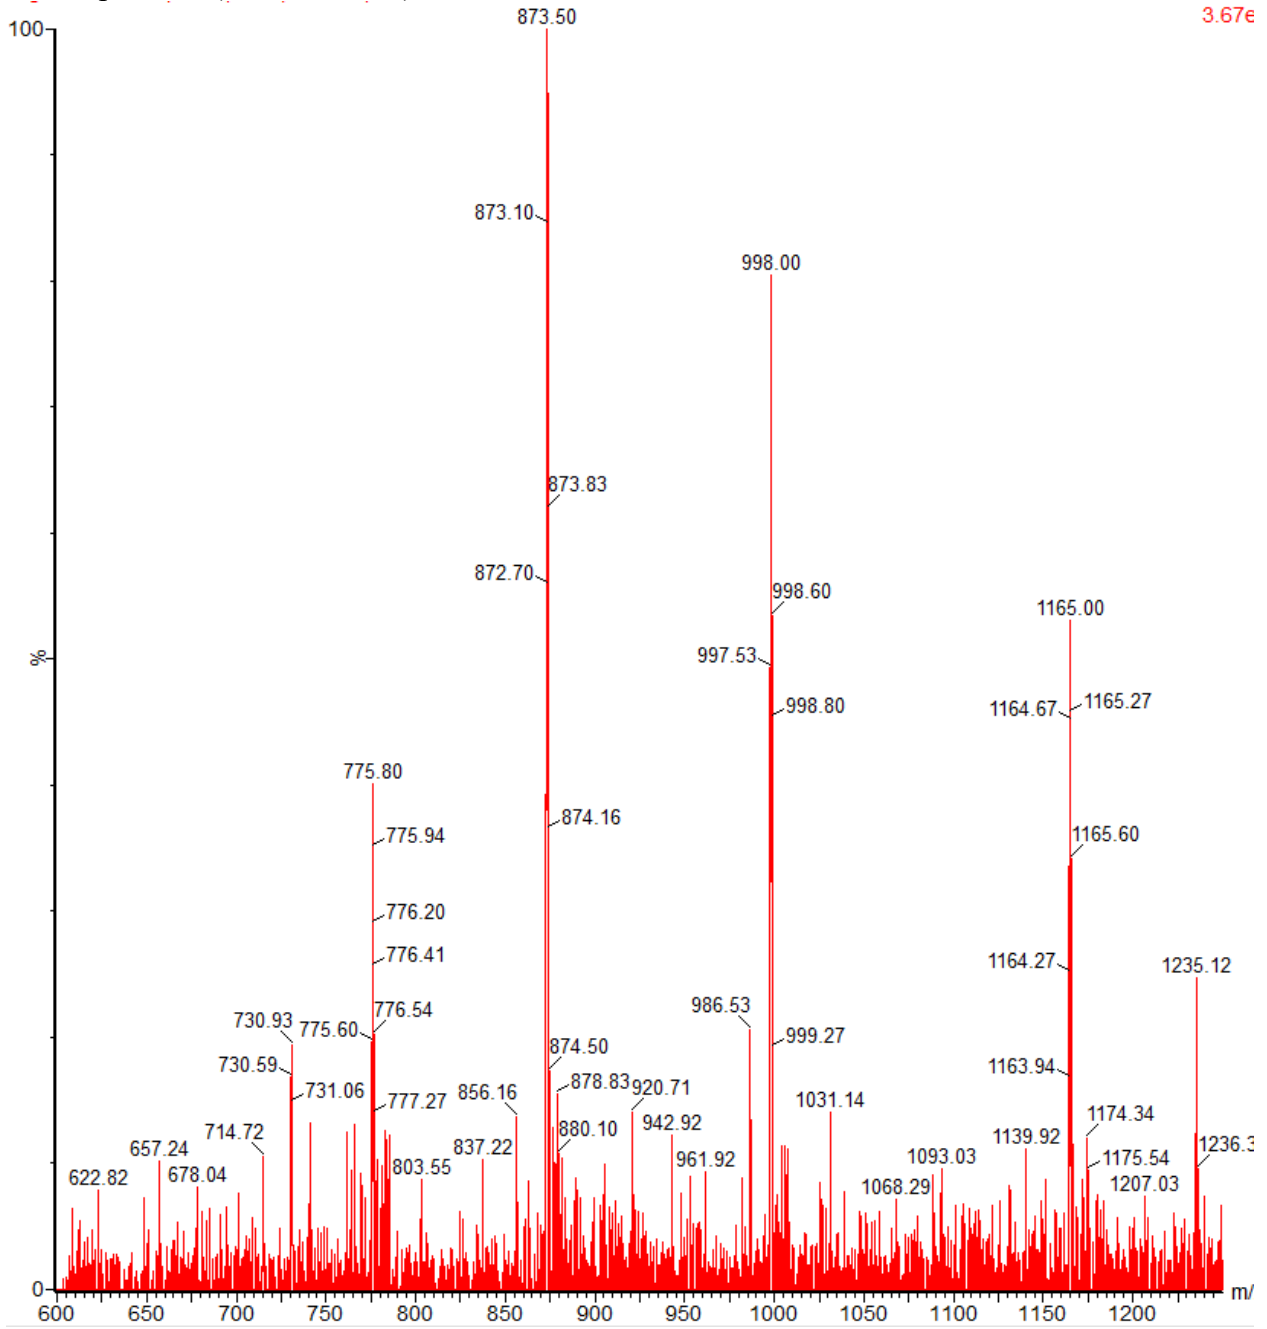

# Deconvoluted Mass Spectrum

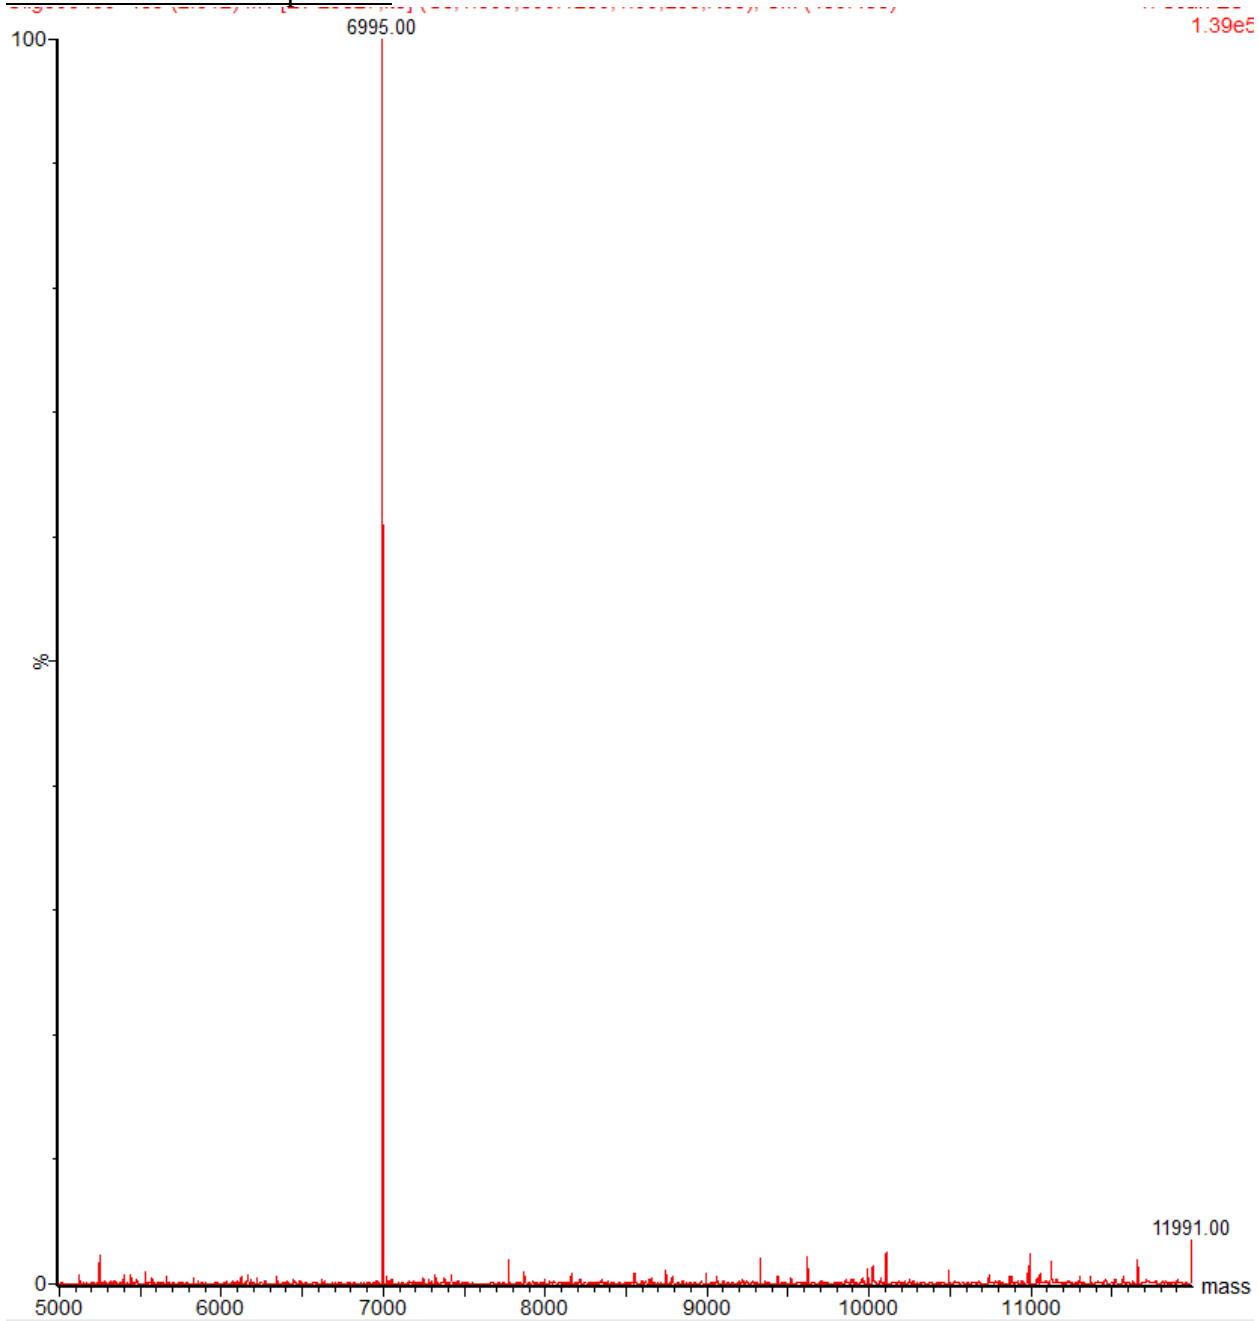

## LCMS Characterization of 20

Using  $\Psi$ -14

Produced from **2** by General Procedure **2** (Reaction run with 75 mM  $\Psi$ -14 and 225 mM DBU):

Yield (A260): 76%

Expected Mass: 6995.11

Expected (M-6)/6 Ion: 1164.9

Found Deconvoluted Mass: 6995.0

Found (M-6)/6 Ion: 1164.54

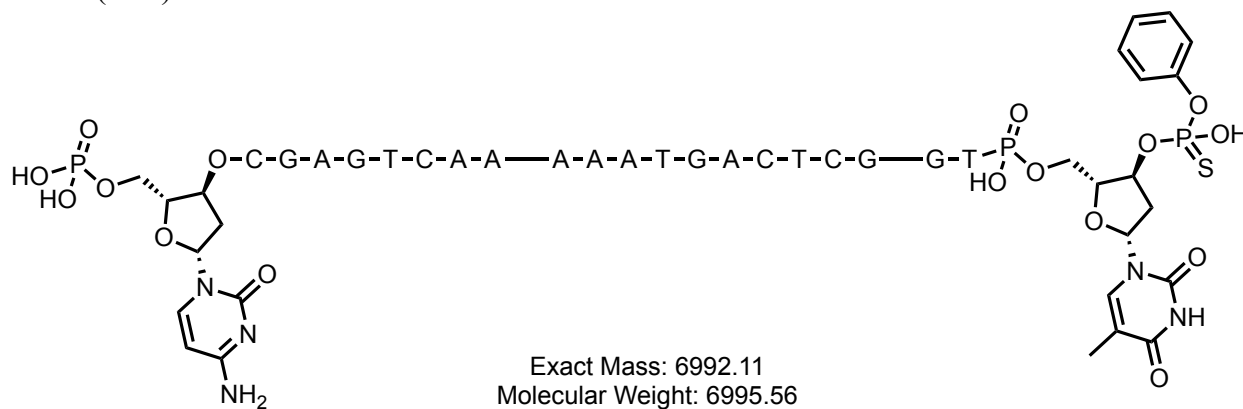

## A260 Chromatogram

Oligo03432

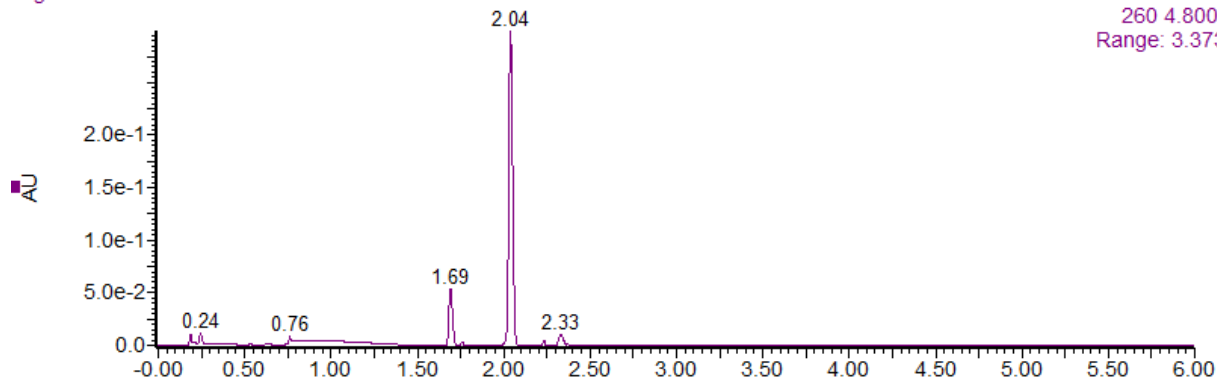

Mass Spectrum (RT= 2.04 min)

5.31e4

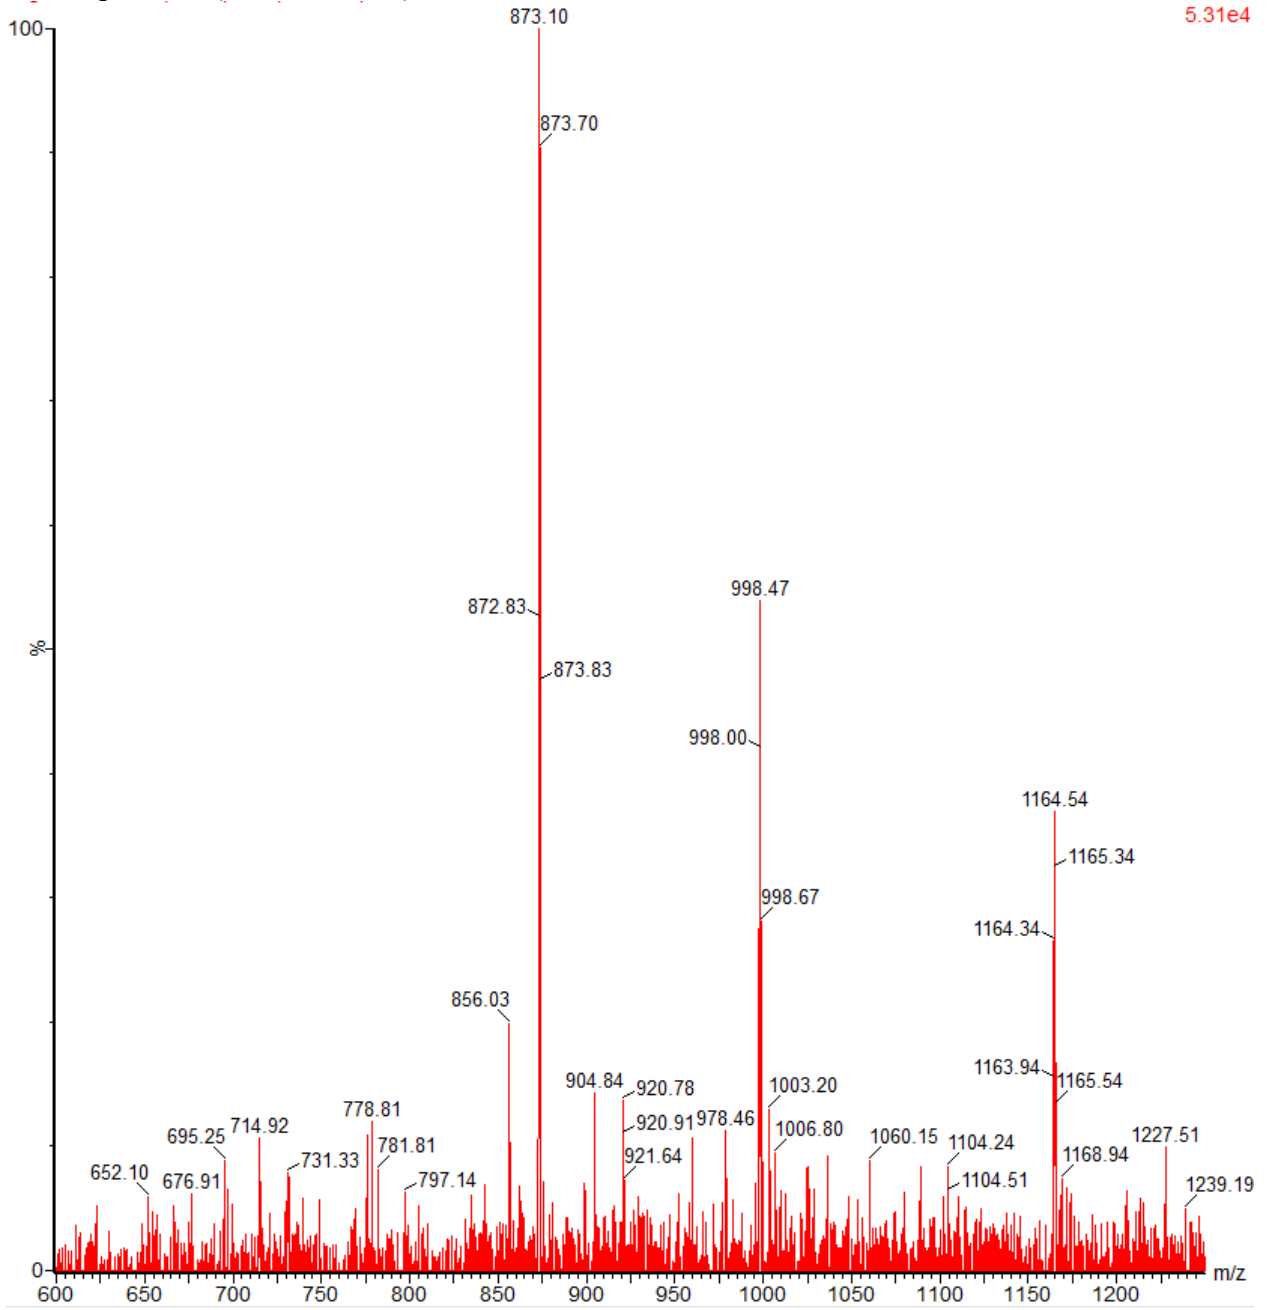

# Deconvoluted Mass Spectrum

7.05e4

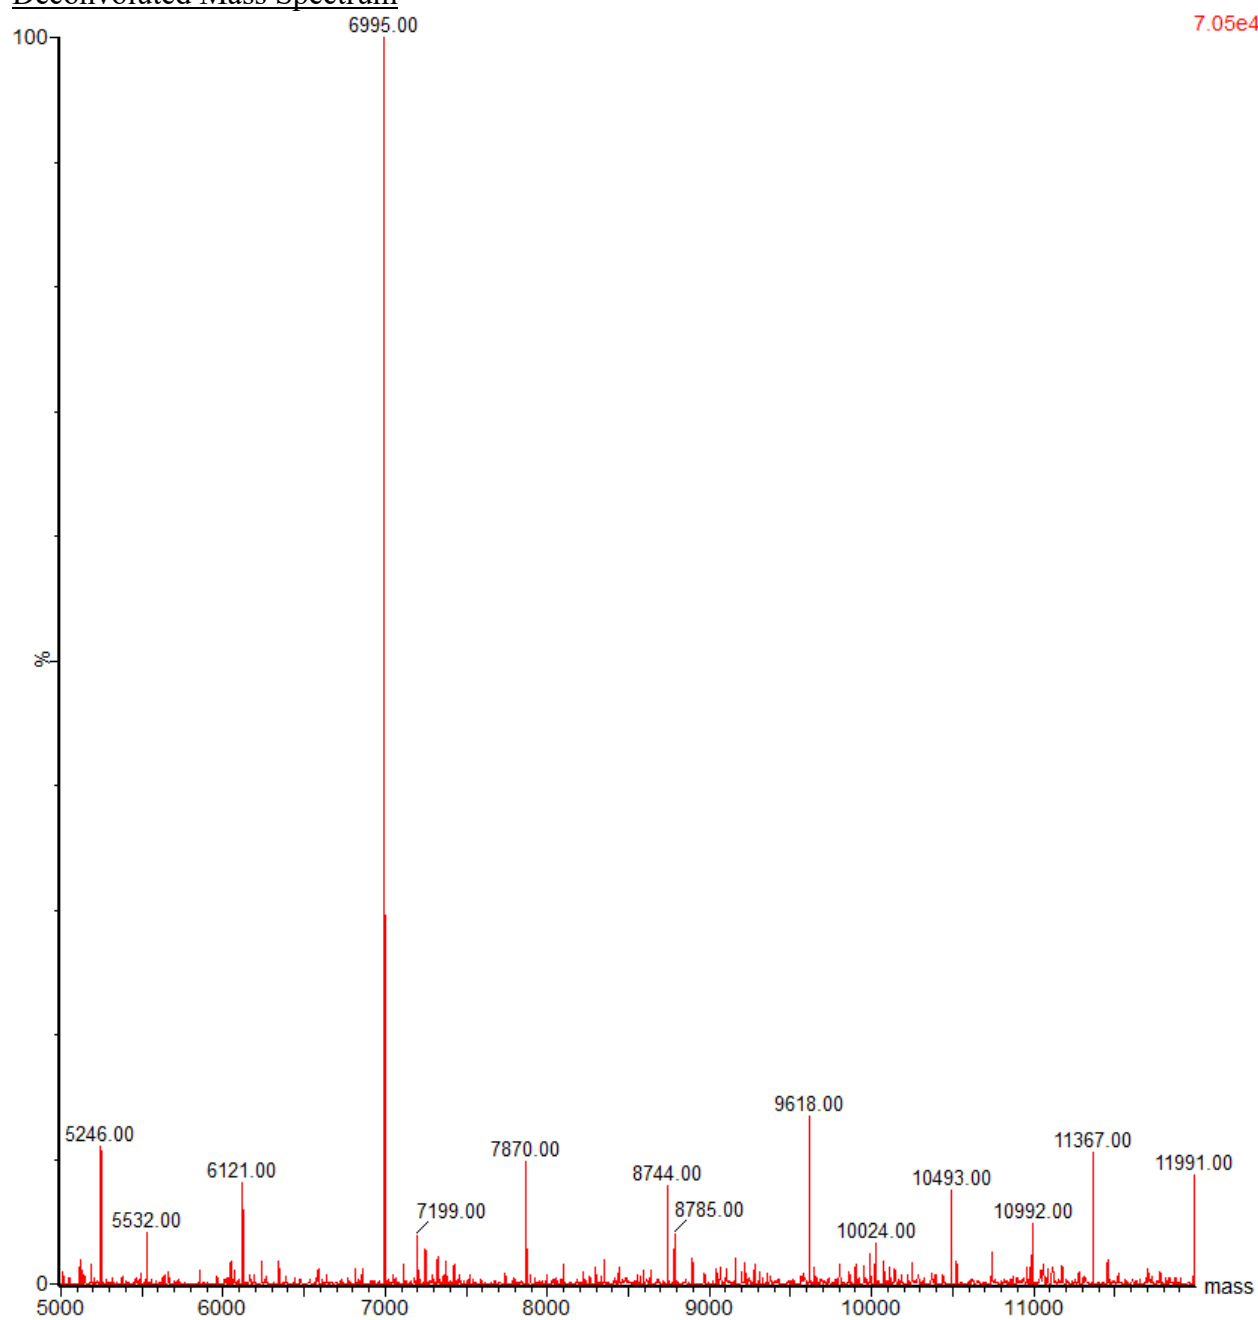



## LCMS Characterization of 21

Using  $\Psi$ -15

Produced from **1** by General Procedure **2** (Reaction run with 75 mM  $\Psi$ -15 and 225 mM DBU):

Yield (A260): 77%

Expected Mass: 7003.6

Expected (M-6)/6 Ion: 1166.3

Found Deconvoluted Mass: 7004.0

Found (M-6)/6 Ion: 1166.2

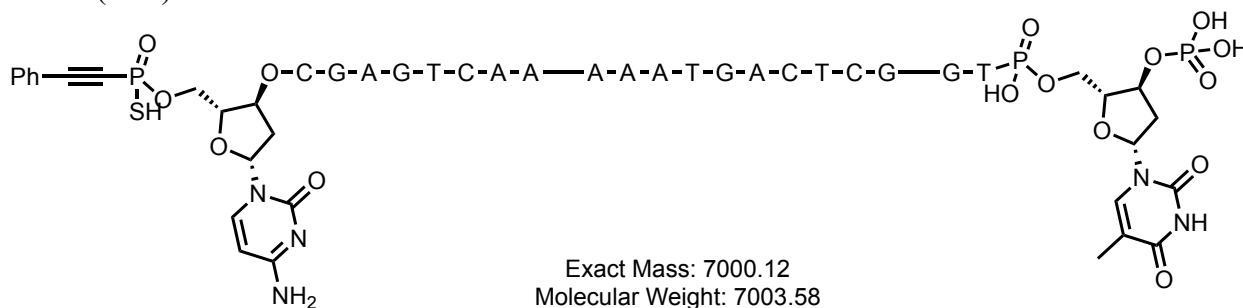

### A260 Chromatogram

Oligo03493

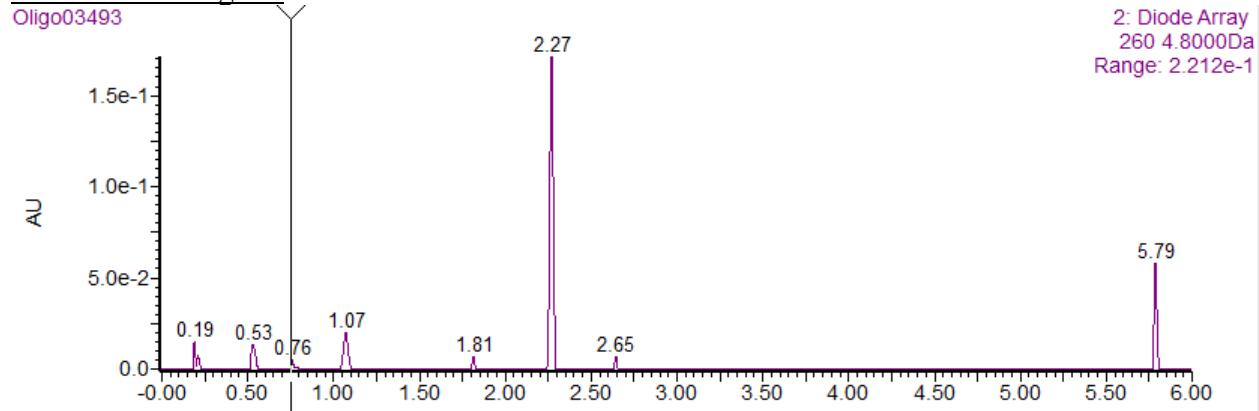

Mass Spectrum (RT= 2.27 min)

1.15e4

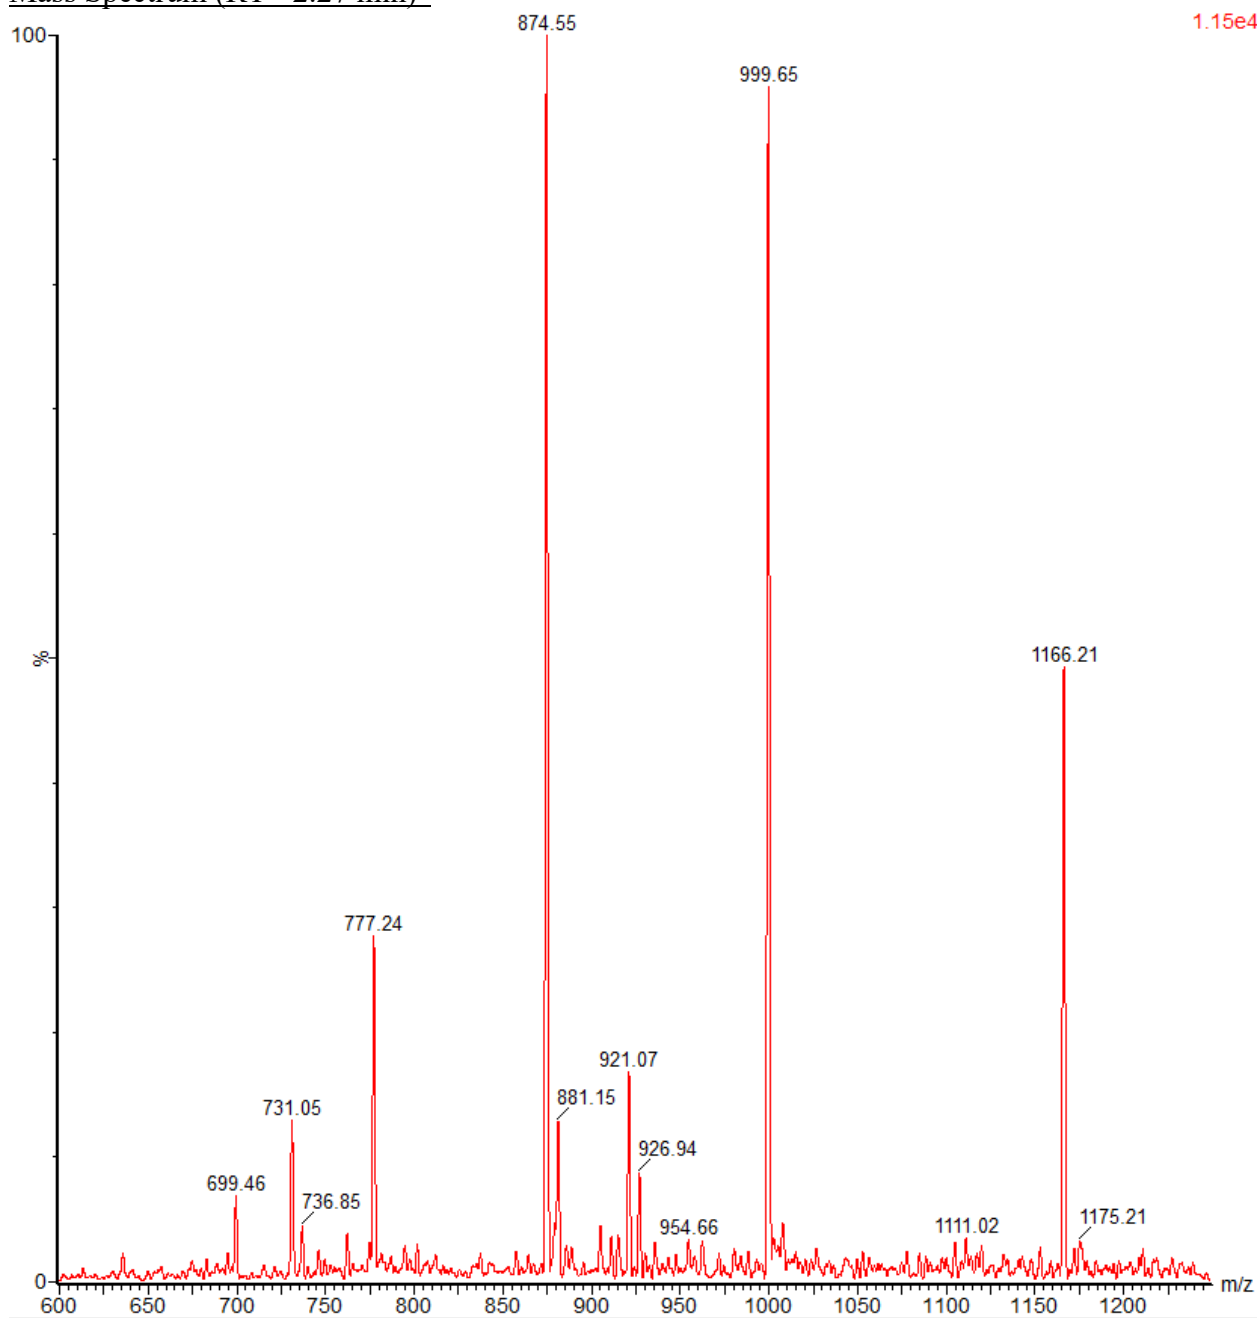

# Deconvoluted Mass Spectrum

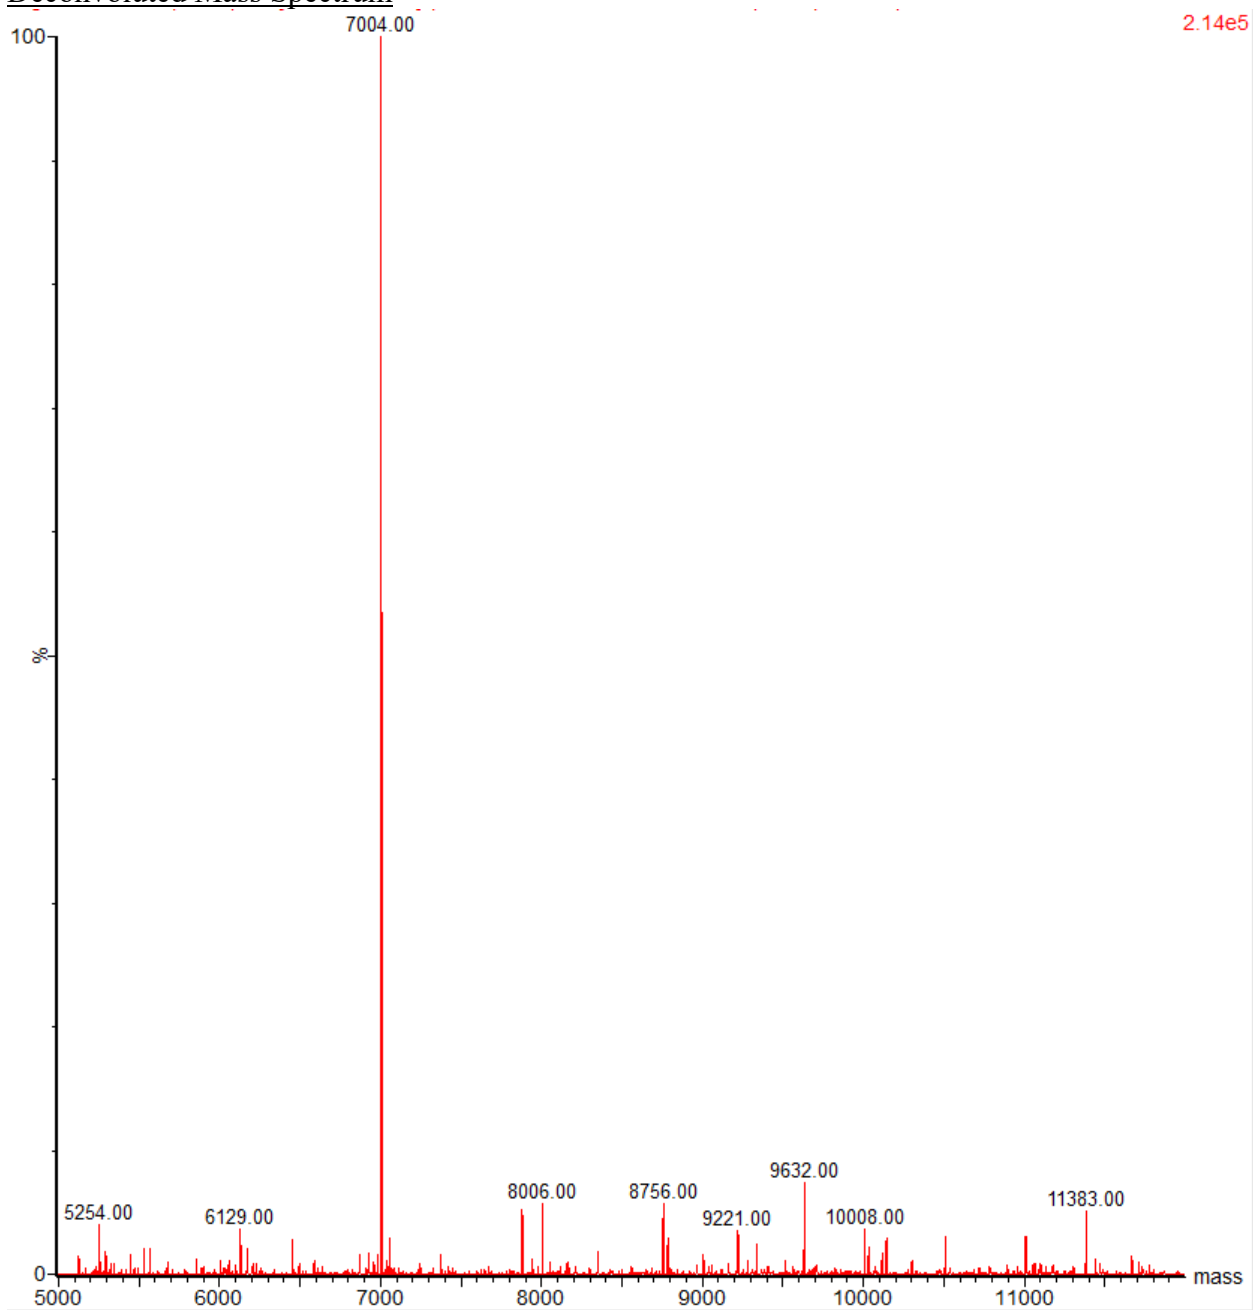

## LCMS Characterization of 22

Using  $\Psi$ -15

Produced from **1** by General Procedure **2** (Reaction run with 75 mM  $\Psi$ -15 and 225 mM DBU):

Yield (A260): 56%

Expected Mass: 7003.6

Expected (M-6)/6 Ion: 1166.3

Found Deconvoluted Mass: 7003.0

Found (M-6)/6 Ion: 1166.2

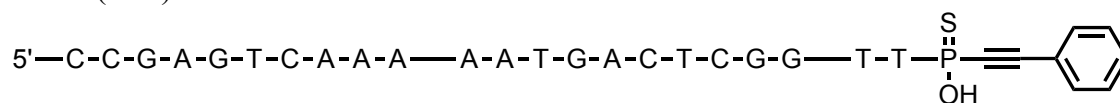

Molecular Weight: 7003.58

## A260 Chromatogram

Oligo03494

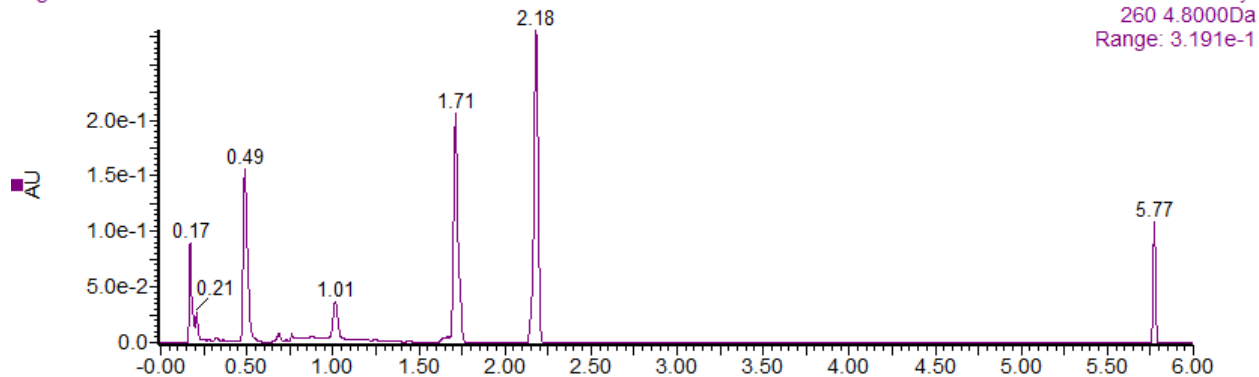

## TIC

Oligo03494

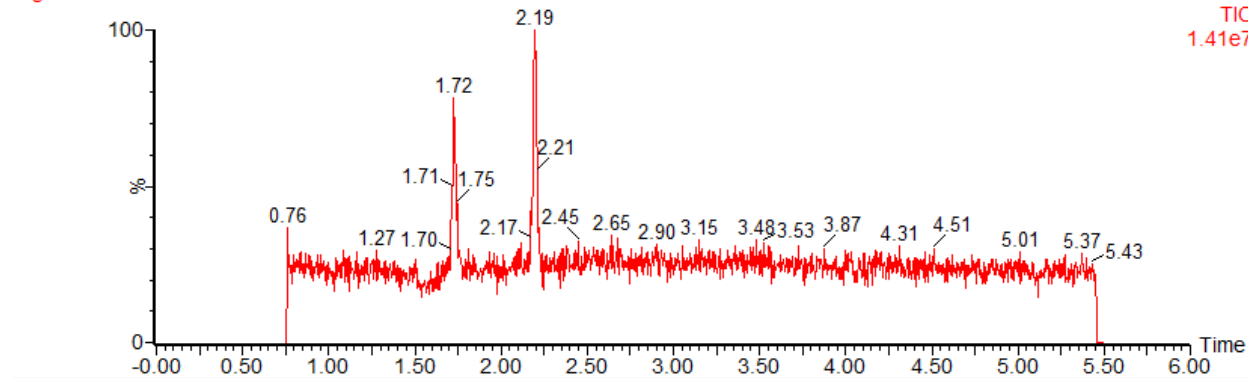

Mass Spectrum (RT= 2.27 min)

1.95e5

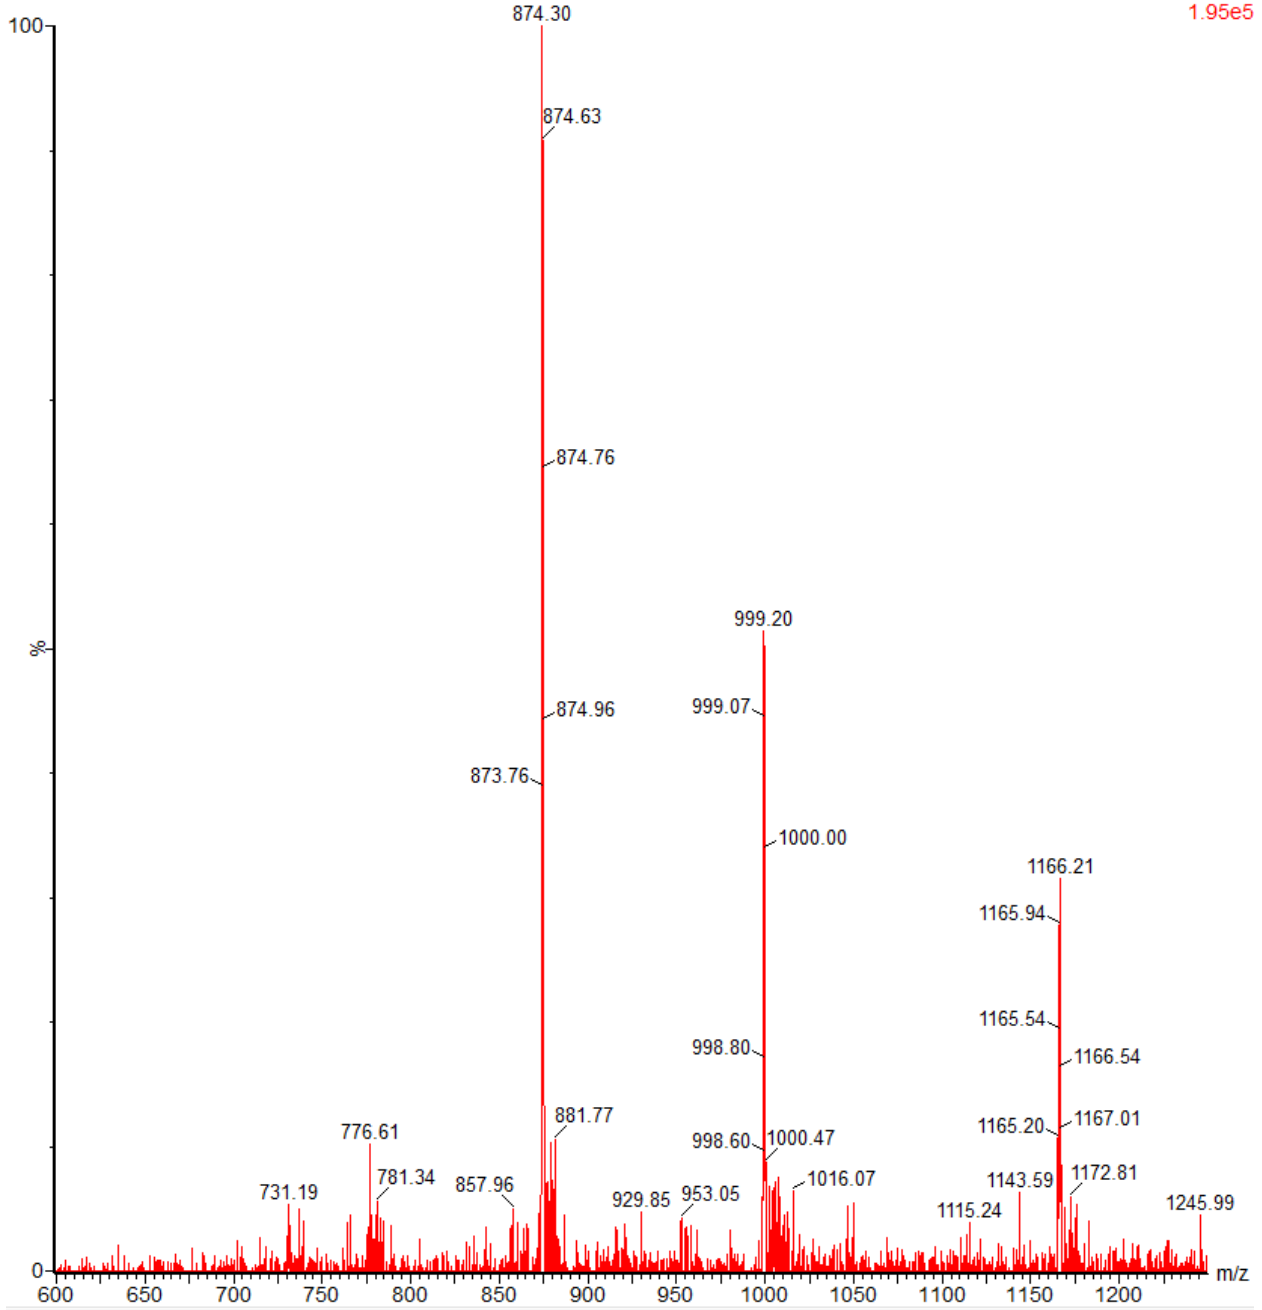

# Deconvoluted Mass Spectrum

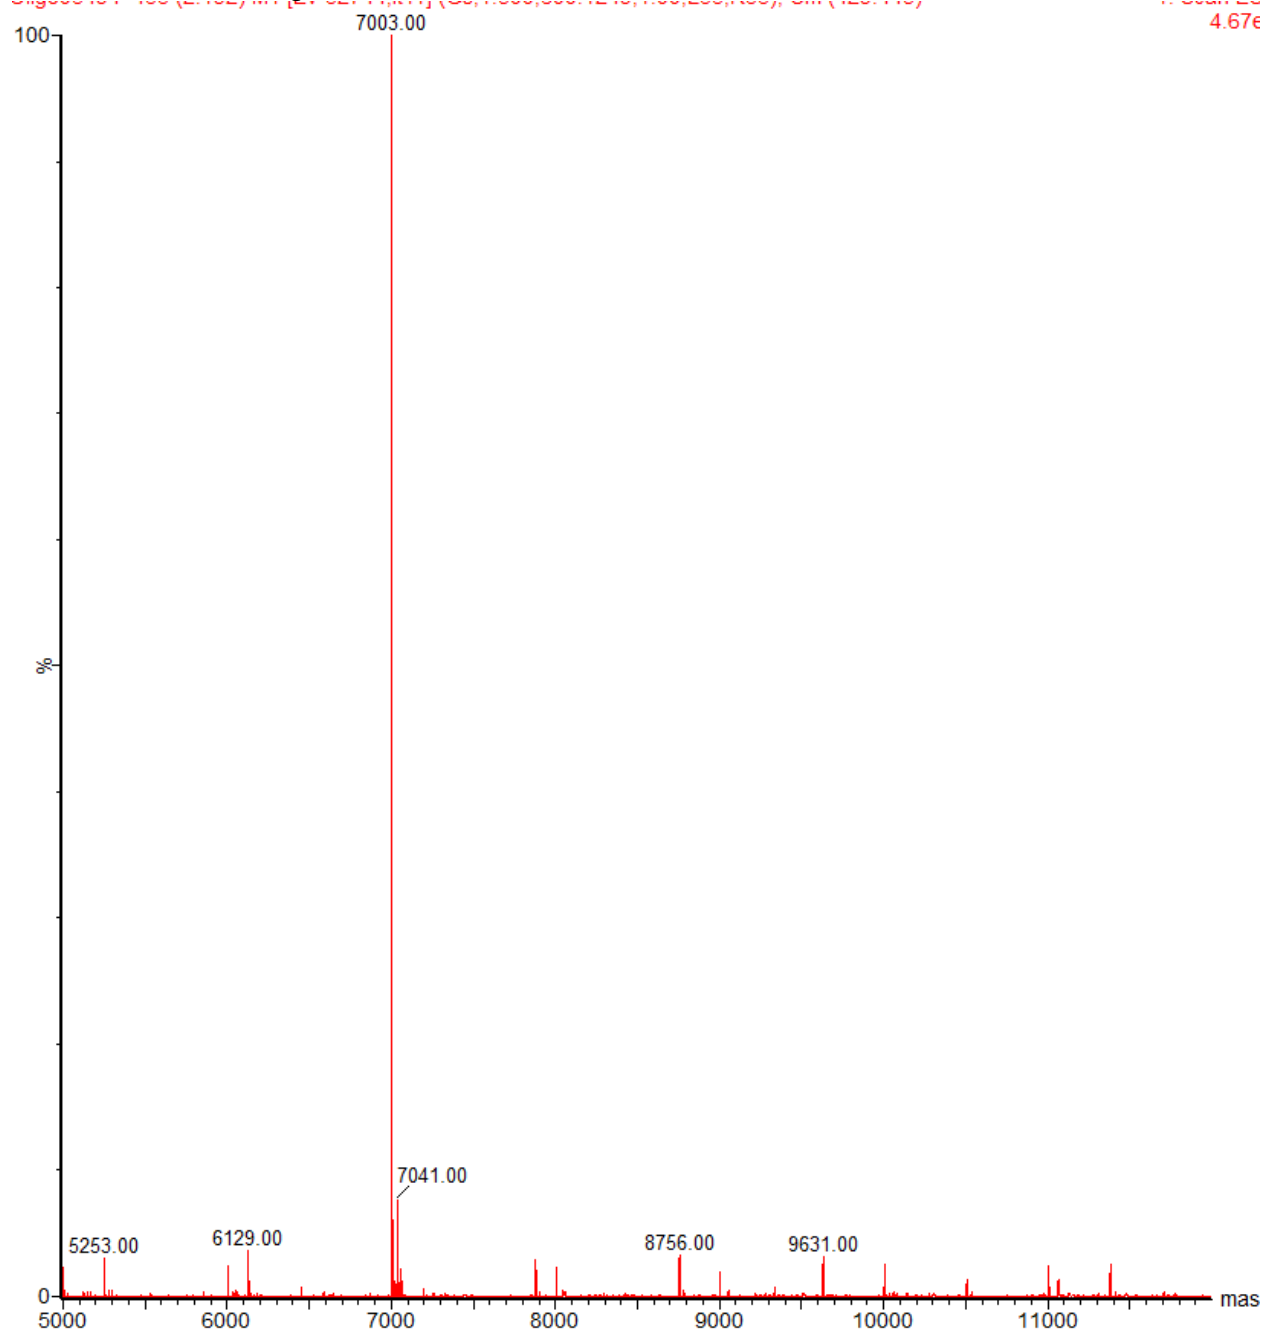

## LCMS Characterization of 23

Using  $\Psi$ -17

Produced from **1** by General Procedure **2** (Reaction run at 37°C):

Yield (A260): 91%

Expected Mass: 7168.69

Expected (M-6)/6 Ion: 1193.8

Found Deconvoluted Mass: 7169.00

Found (M-6)/6 Ion: 1193.69

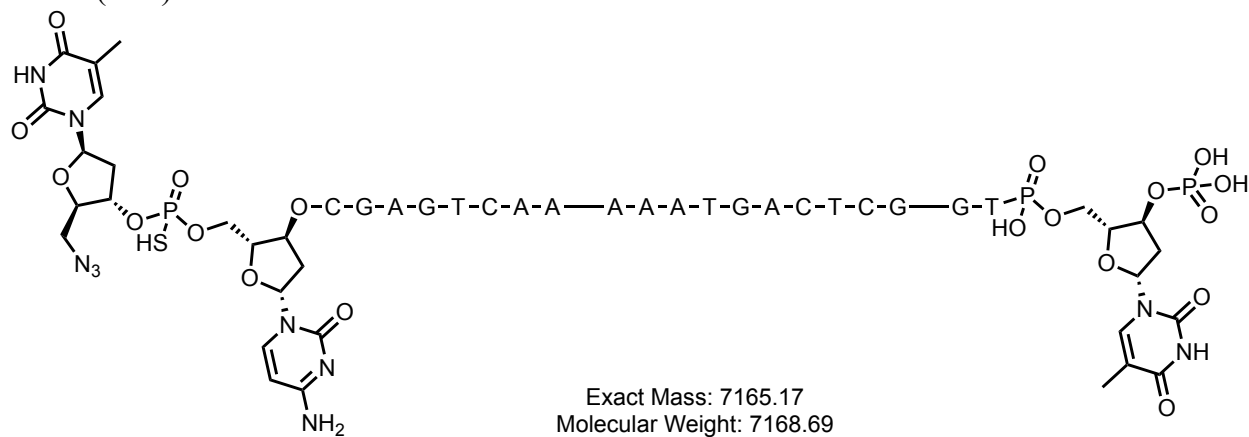

### A260 Chromatogram

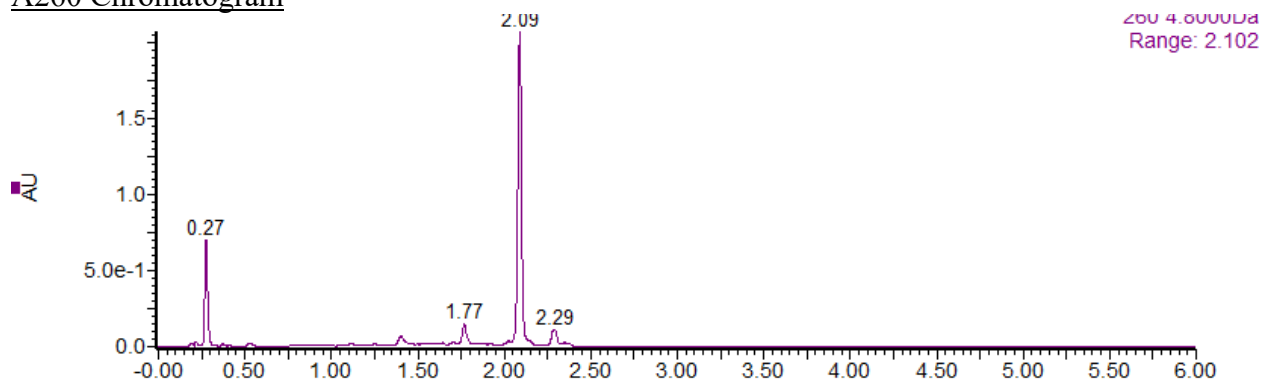

### TIC

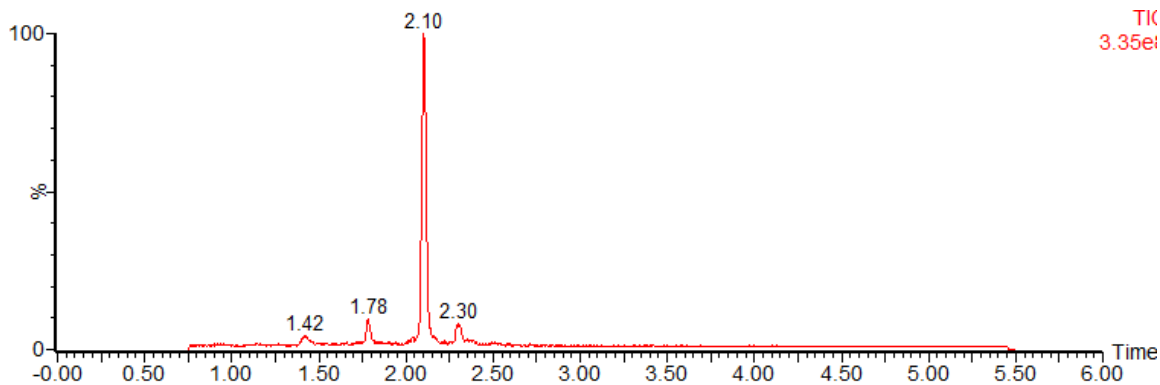

Mass Spectrum (RT= 2.1 min)

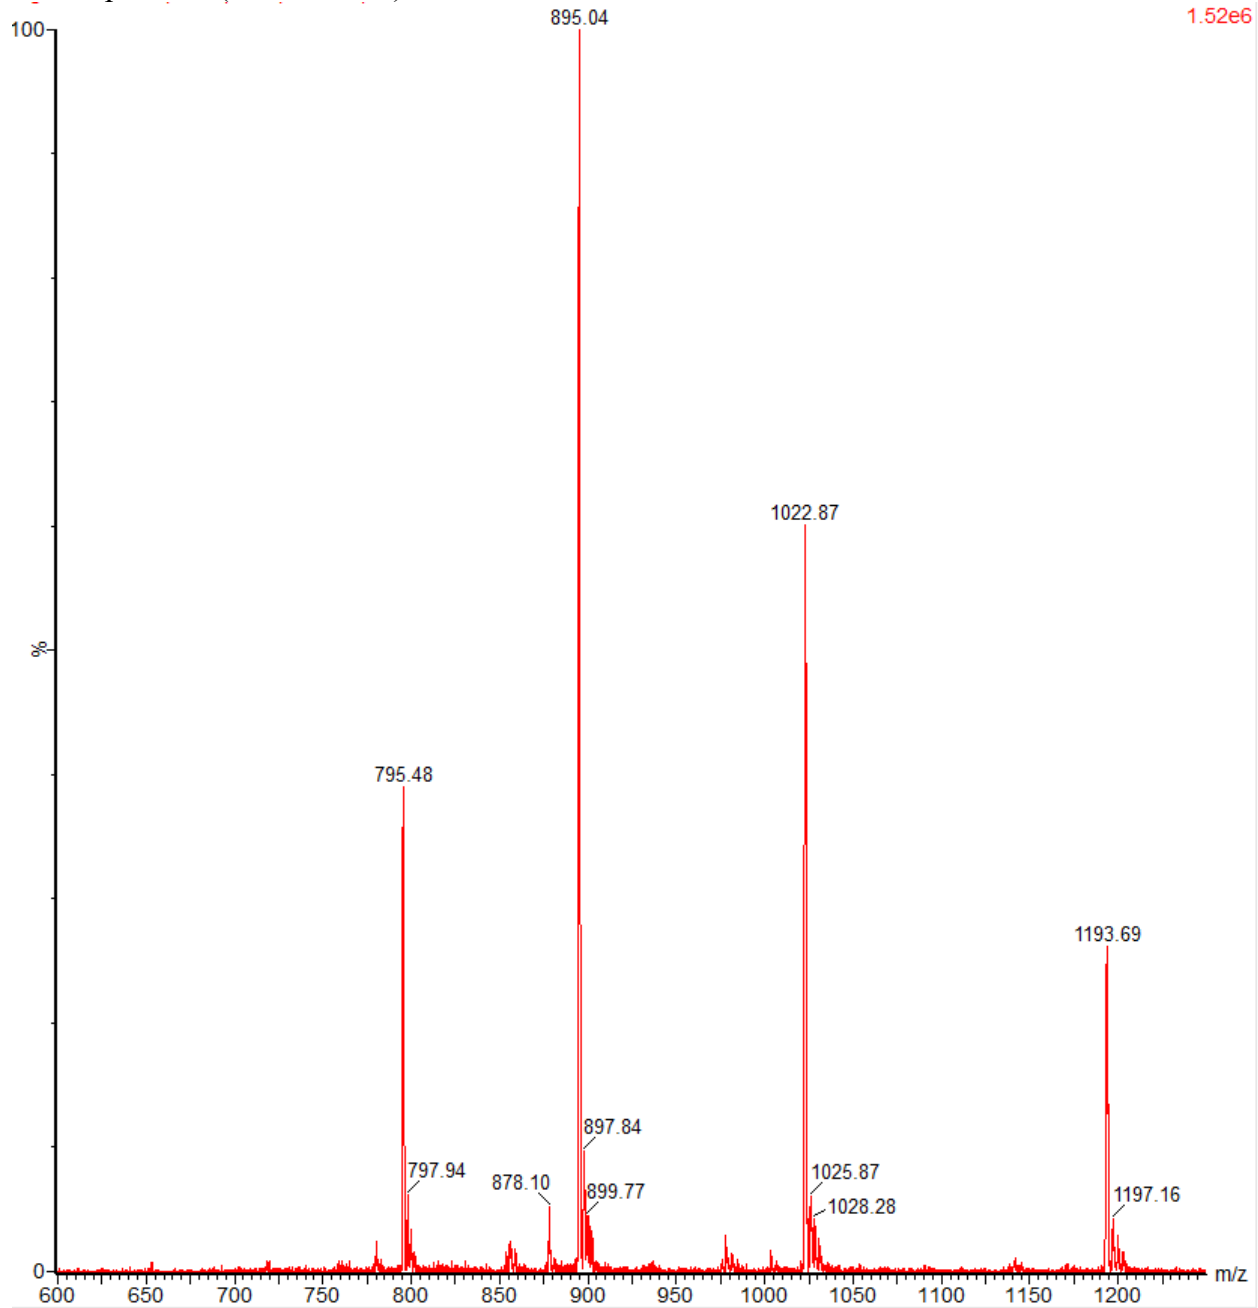



# Deconvoluted Mass Spectrum

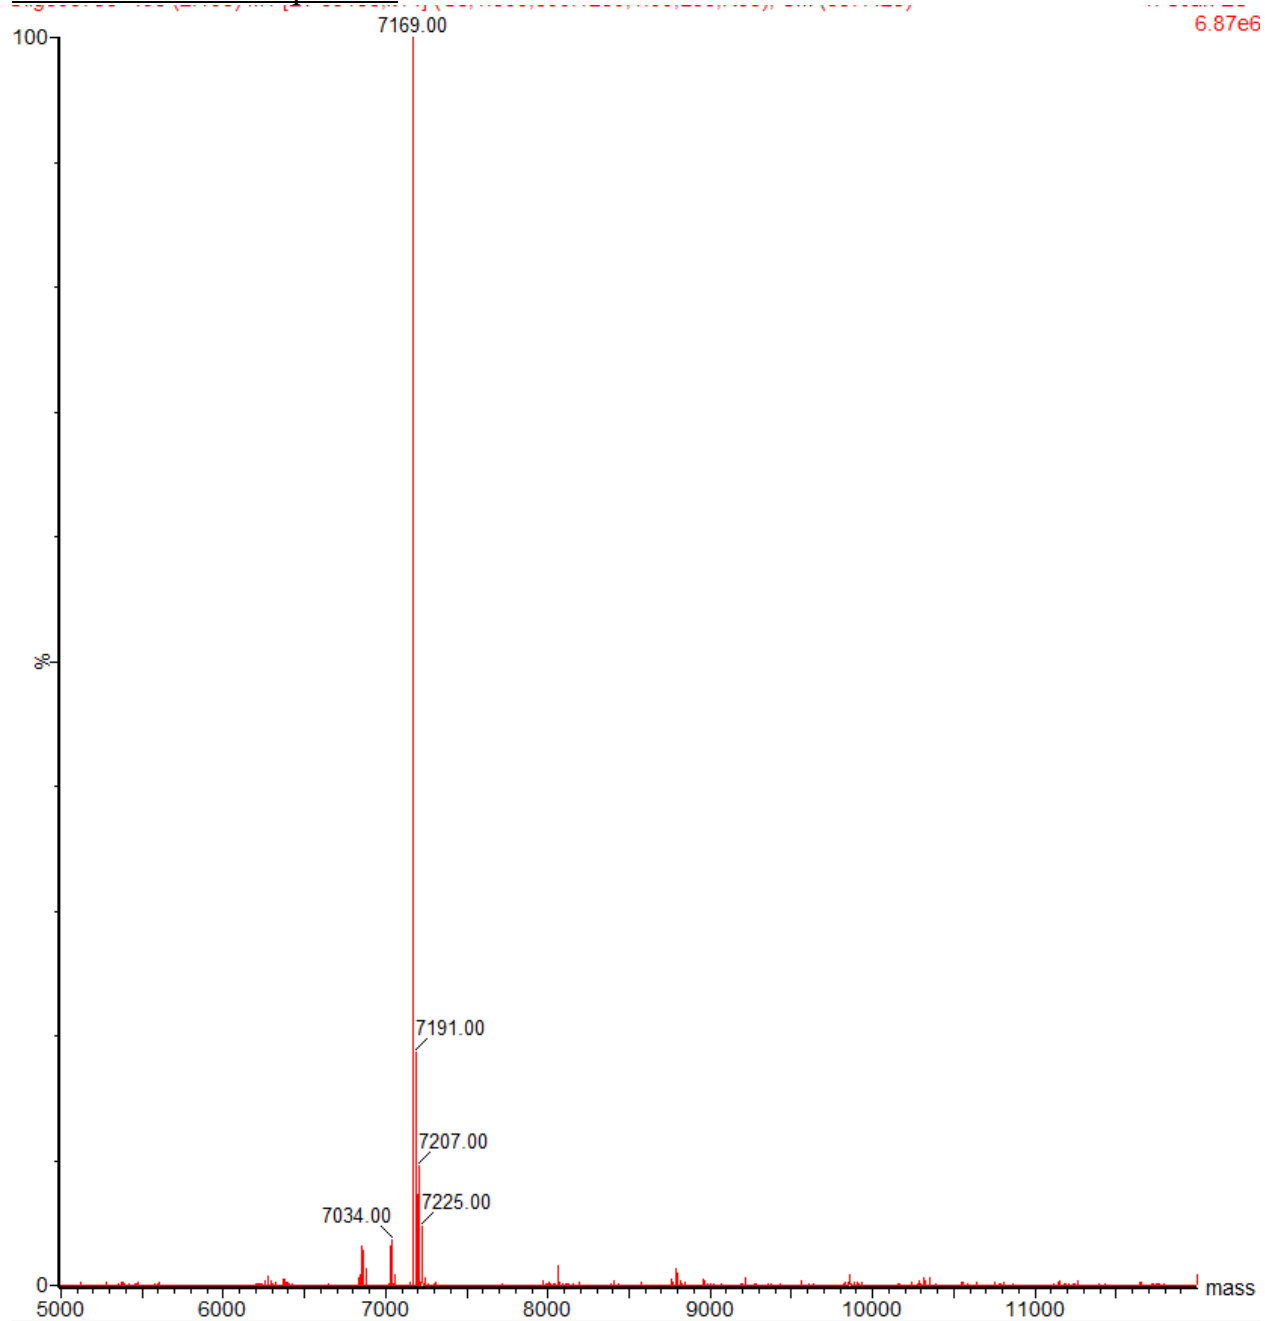

## LCMS Characterization of 24

Using  $\Psi$ -17

Produced from **2** by General Procedure **2** (reaction run with 200 mM  $\Psi$ -17 at 50°C)

Yield (A260): 89%

Expected Mass: 7168.69

Expected (M-6)/6 Ion: 1193.8

Found Deconvoluted Mass: 7169.00

Found (M-6)/6 Ion: 1193.56

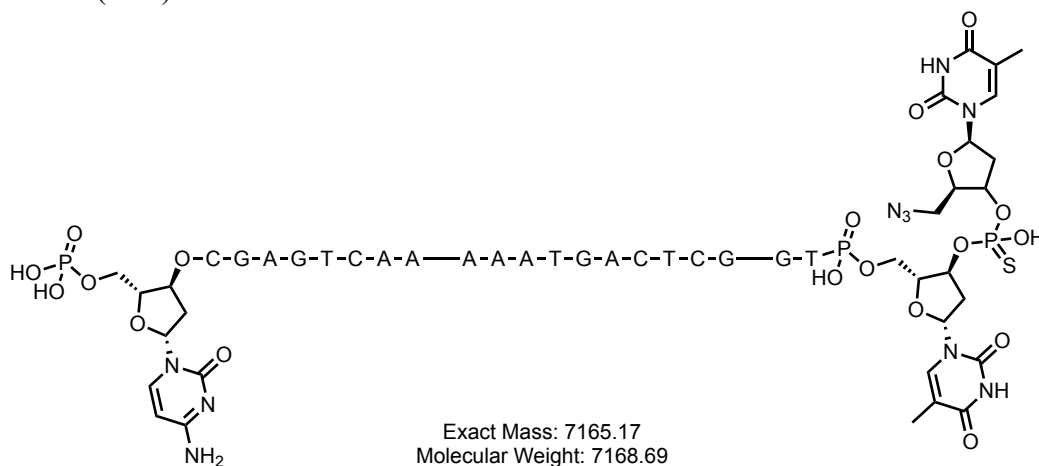

### A260 Chromatogram

Oligo03754

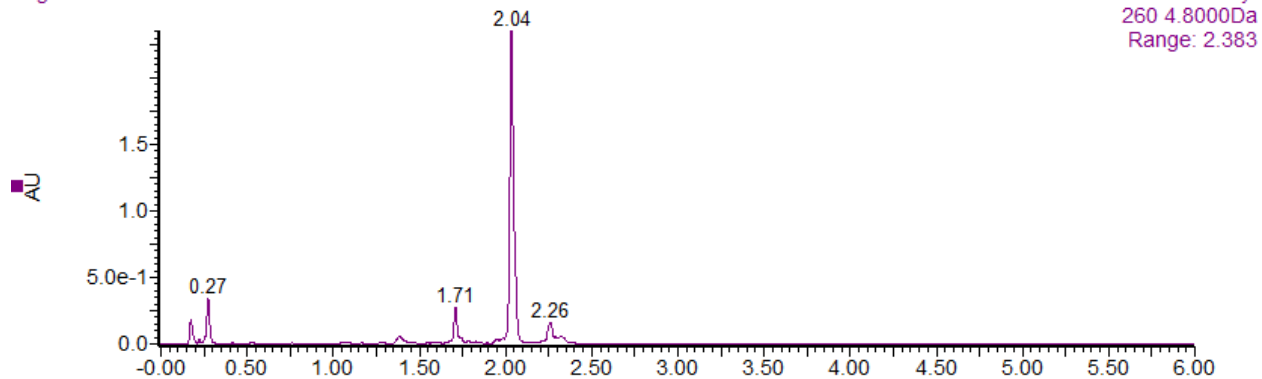

### TIC

Oligo03754

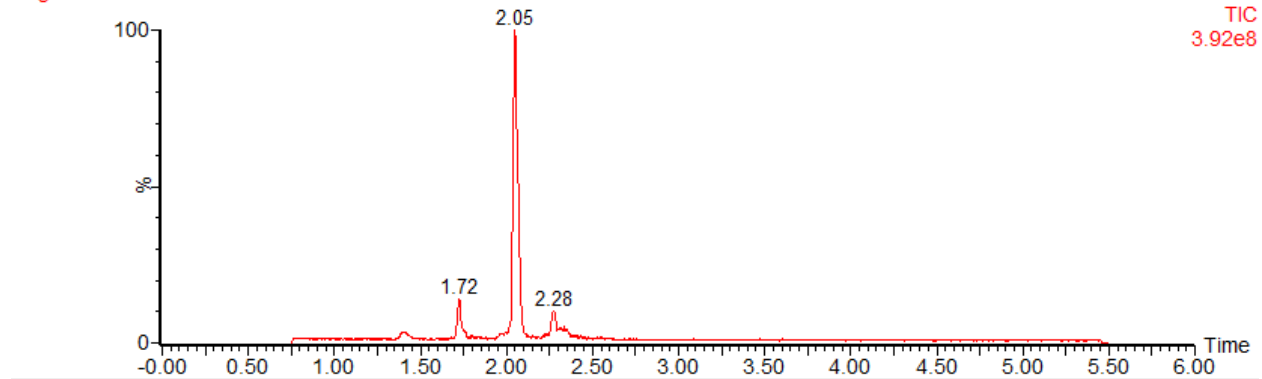

Mass Spectrum (RT= 2.04 min)

Oligo03754 390 (2.049) Cm (377:407)

1: Scan ES-  
3.41e6

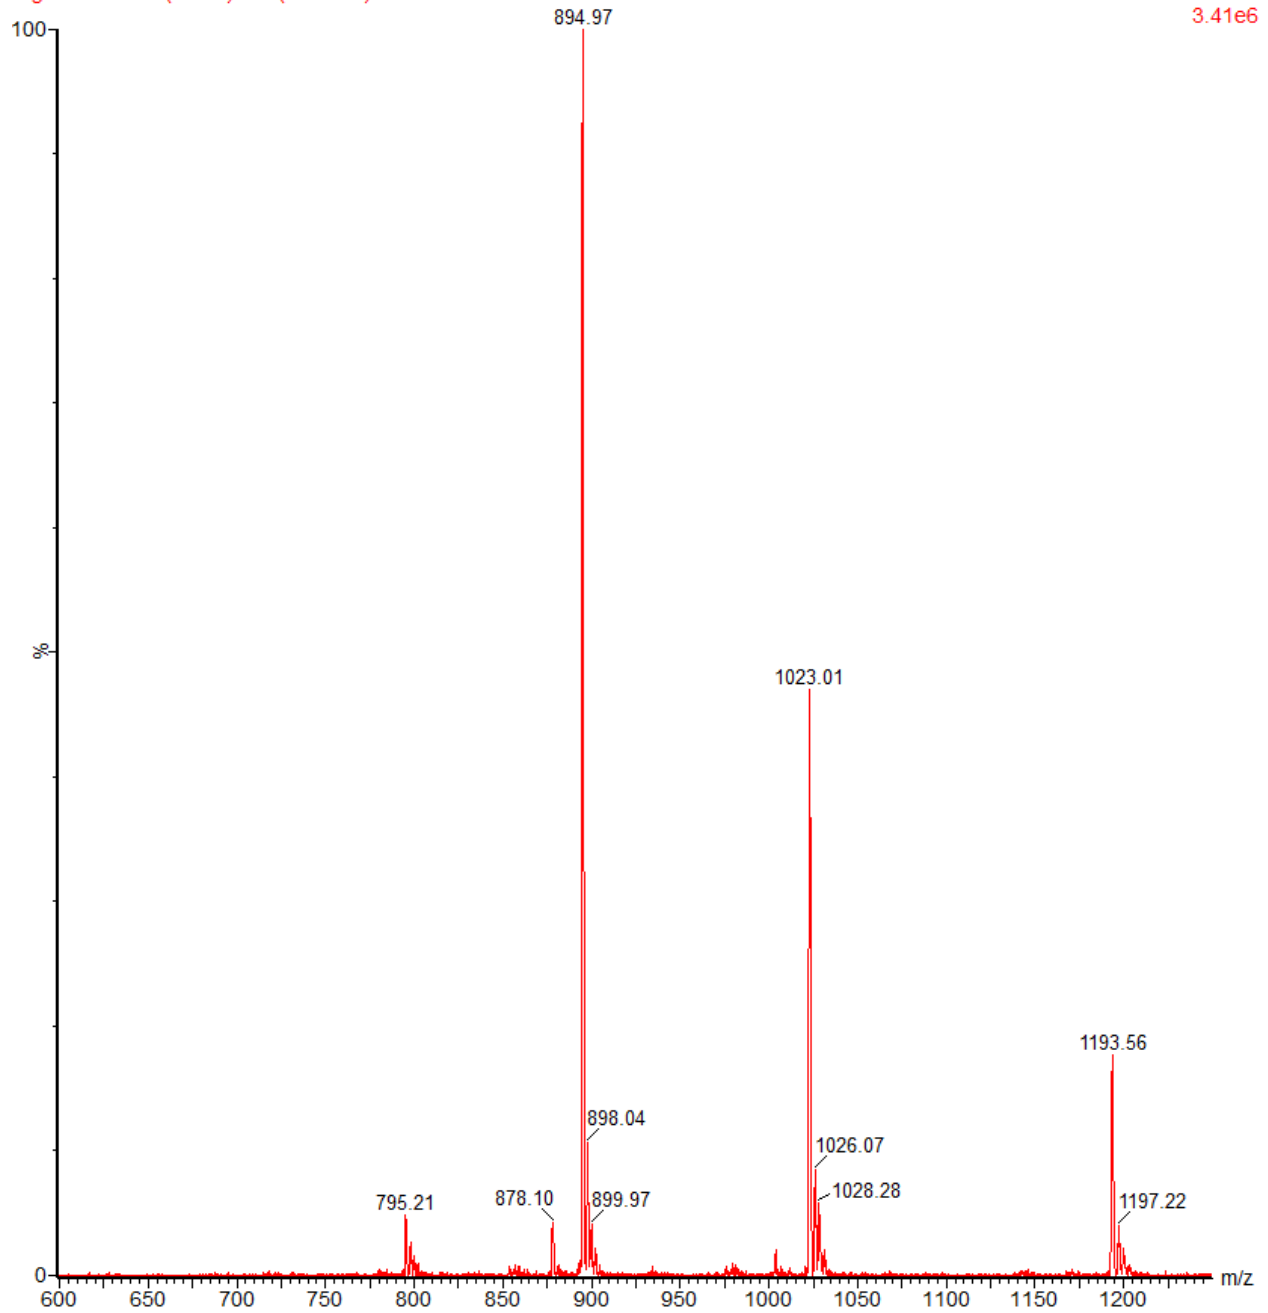

# Deconvoluted Mass Spectrum

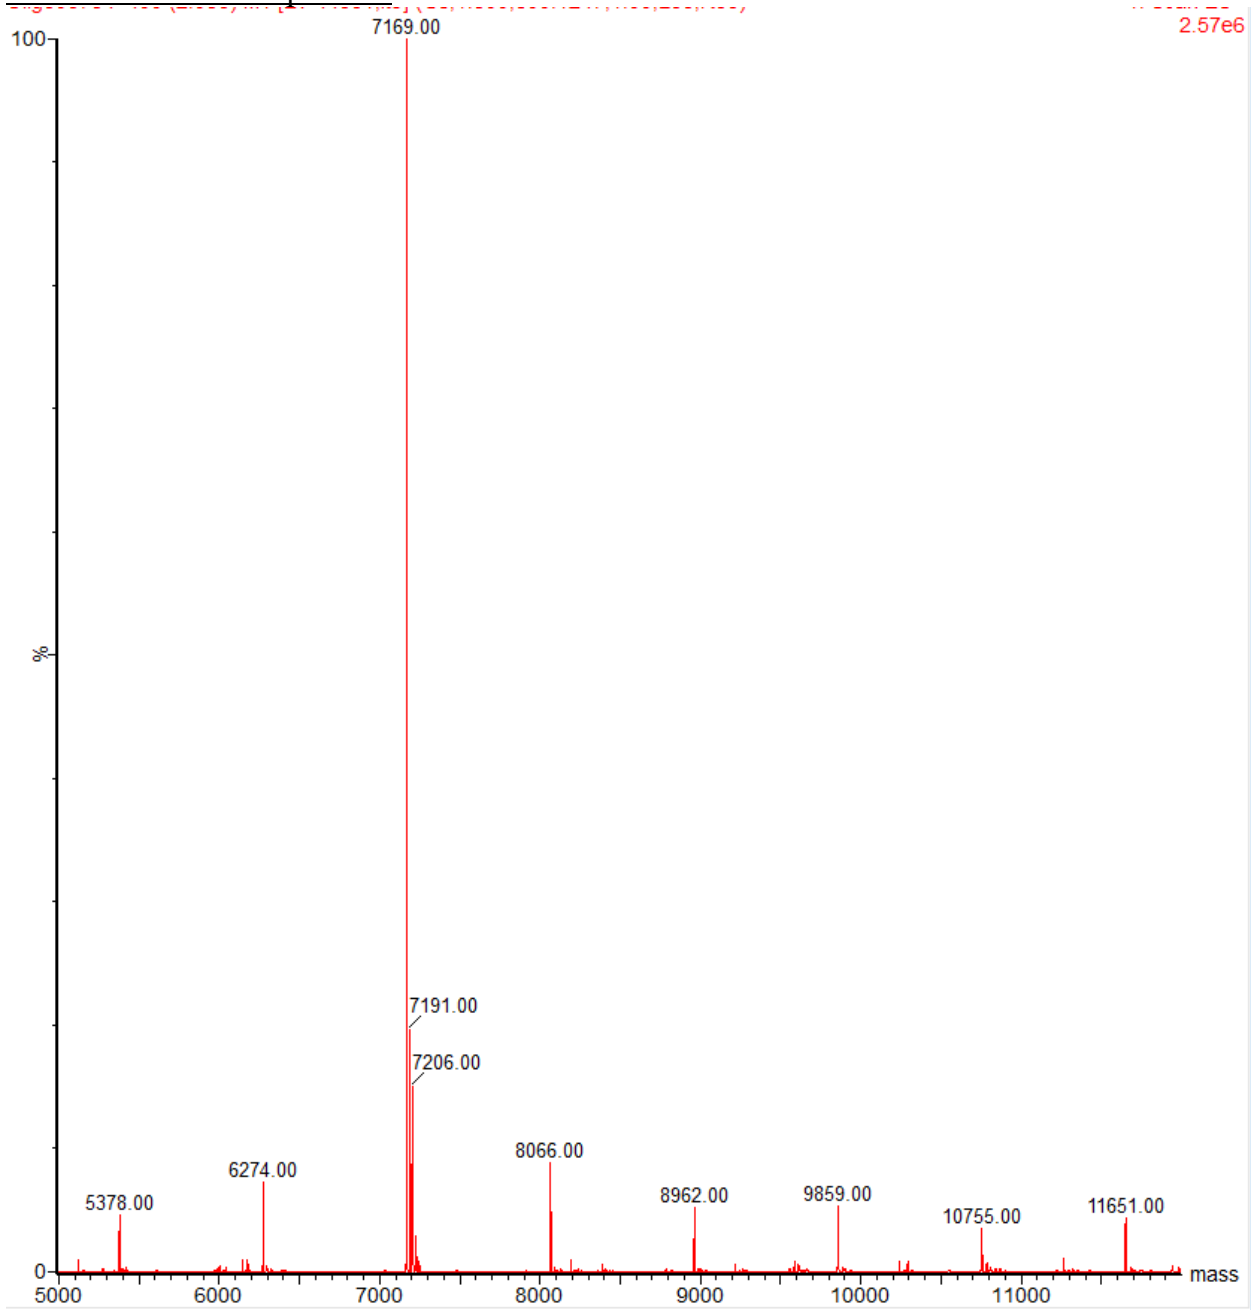

## LCMS Characterization of 23

Using  $\Psi$ -18

Produced from **1** by General Procedure **2** (Reaction run at 37°C):

Yield (A260): 85%

Expected Mass: 7181.72

Expected (M-6)/6 Ion: 1195.6

Found Deconvoluted Mass: 7182.0

Found (M-6)/6 Ion: 1195.69

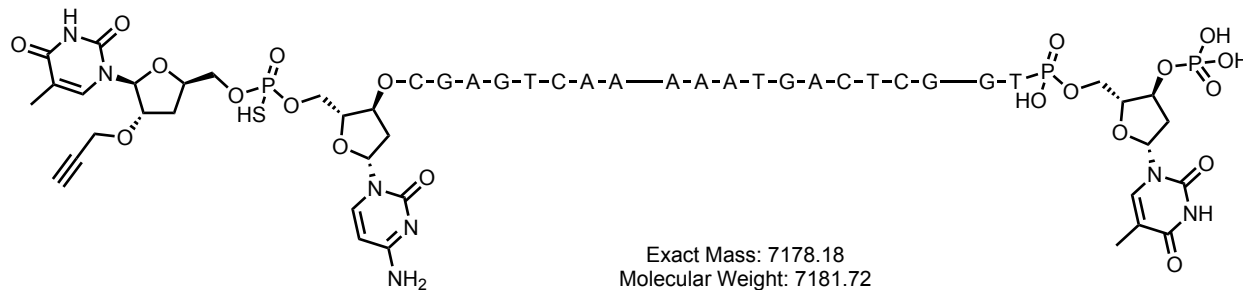

## A260 Chromatogram

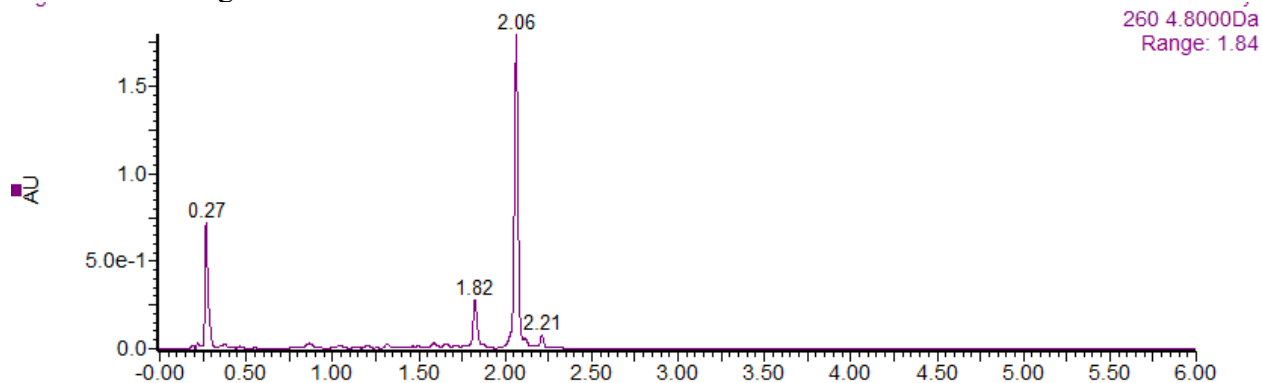

## TIC

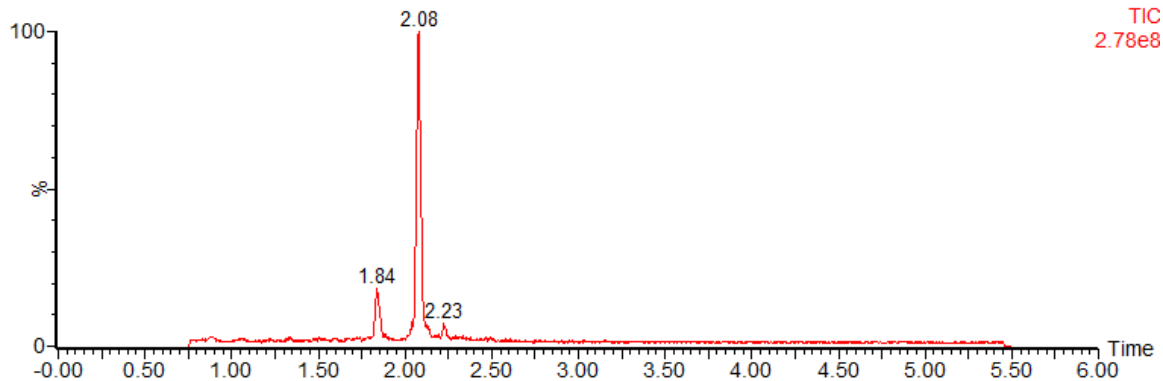

Mass Spectrum (RT= 2.06 min)

1.28e6

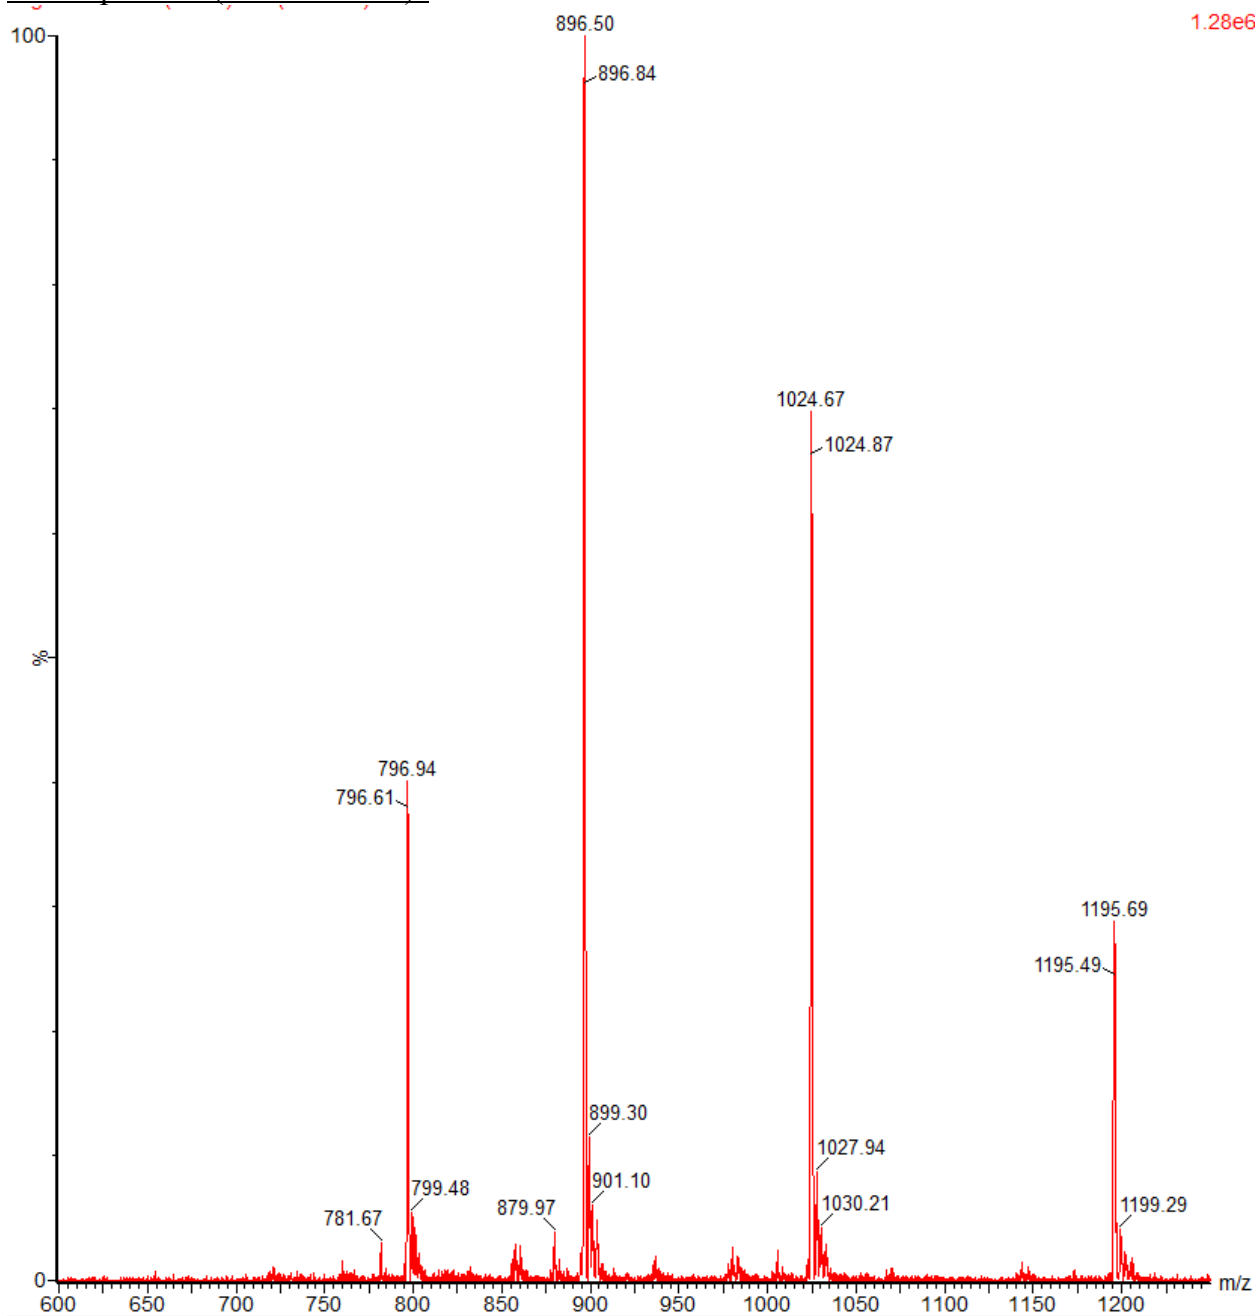

# Deconvoluted Mass Spectrum

5.74e6

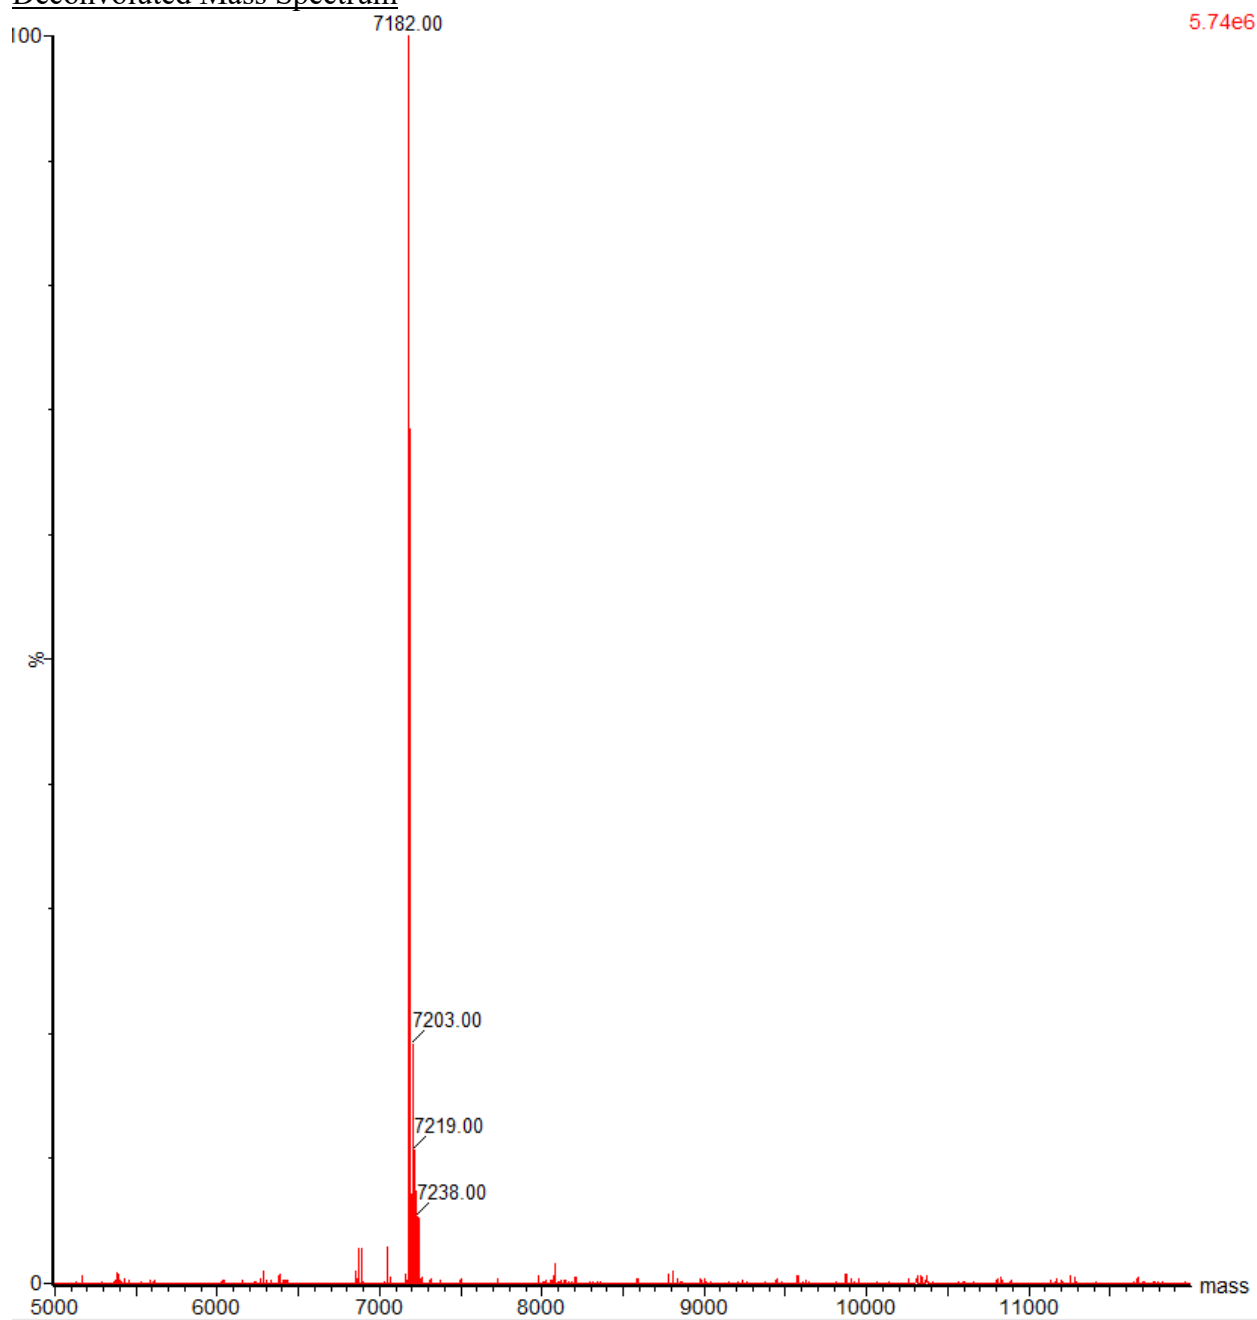

## LCMS Characterization of 26

Using  $\Psi$ -18

Produced from **1** by General Procedure **2** (Reaction run with  $\Psi$ -18 (200 mM) at 50°C):

Yield (A260): 69%

Expected Mass: 7181.72

Expected (M-6)/6 Ion: 1195.6

Found Deconvoluted Mass: 7182.0

Found (M-6)/6 Ion: 1195.69

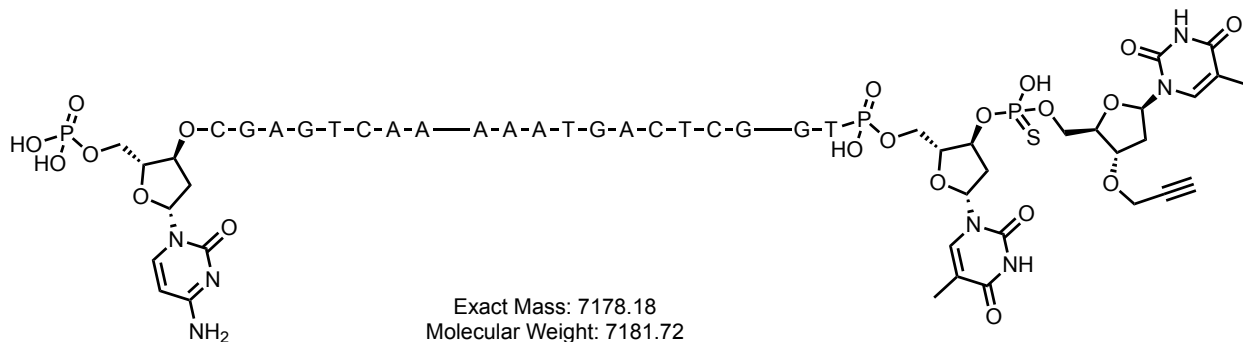

## A260 Chromatogram

Oligo03753

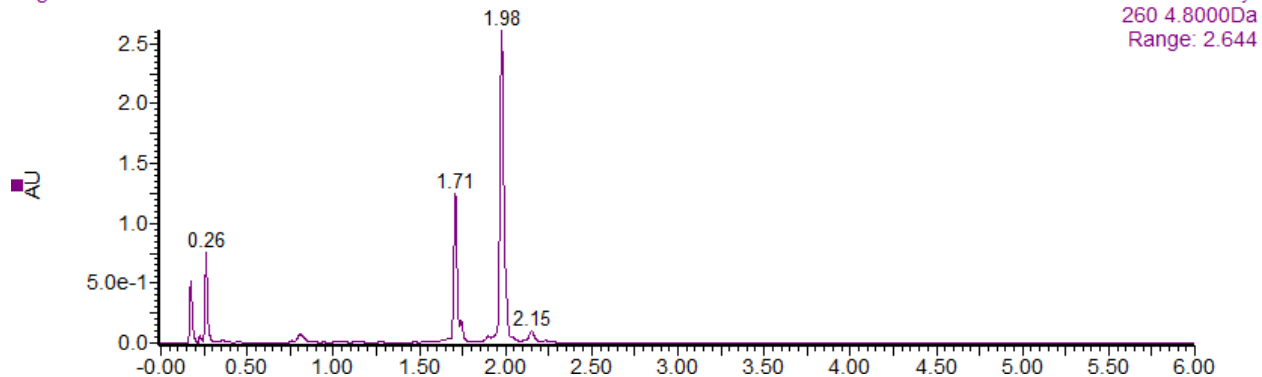

## TIC

Oligo03753

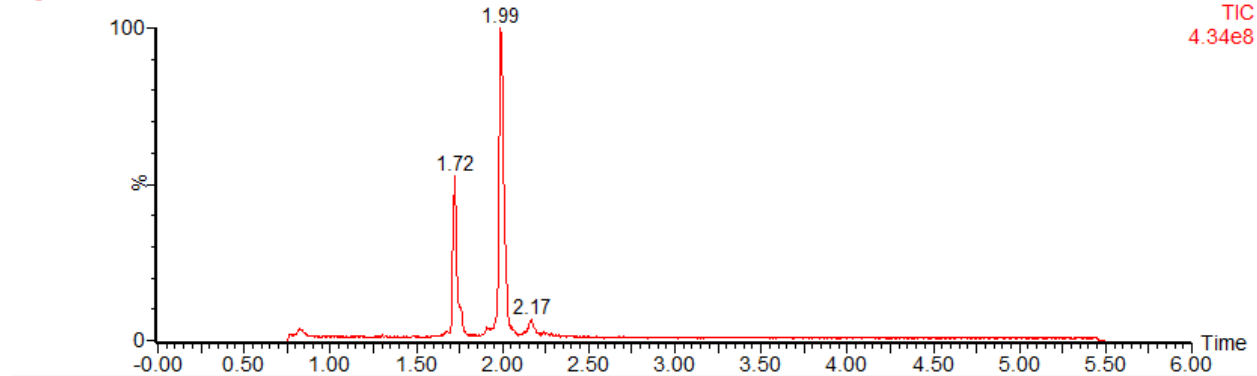



Mass Spectrum (RT= 1.98 min)

2.83e6

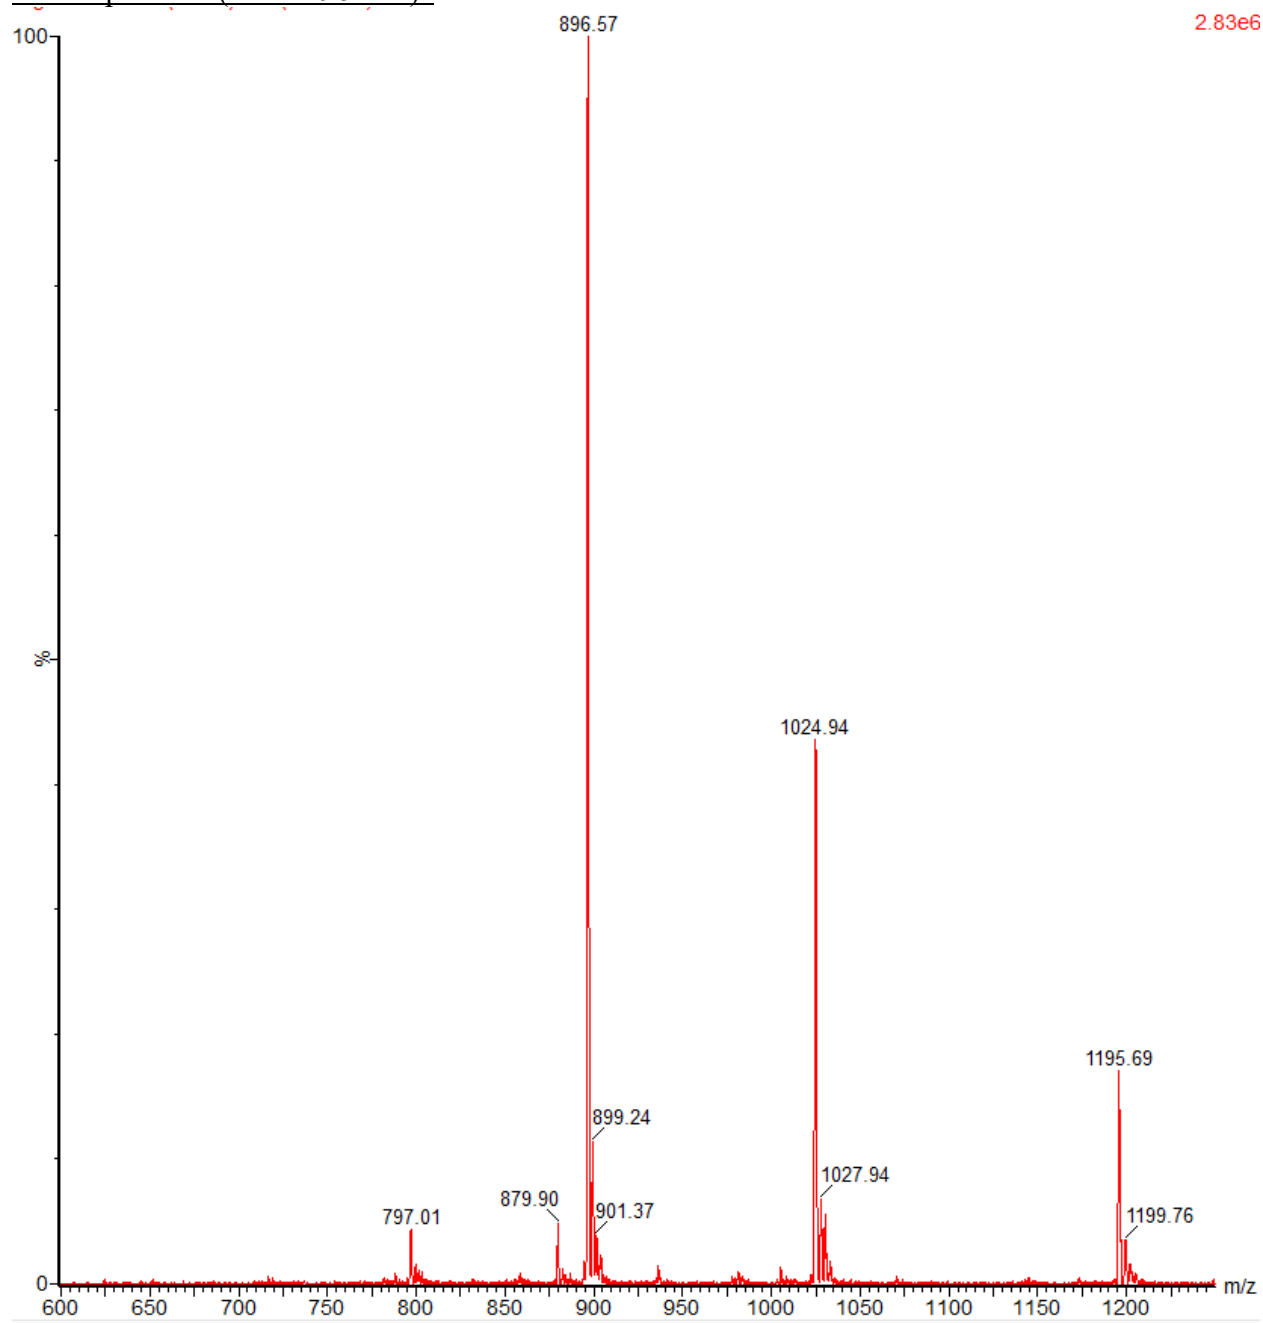

Deconvoluted Mass Spectrum

4.28e6

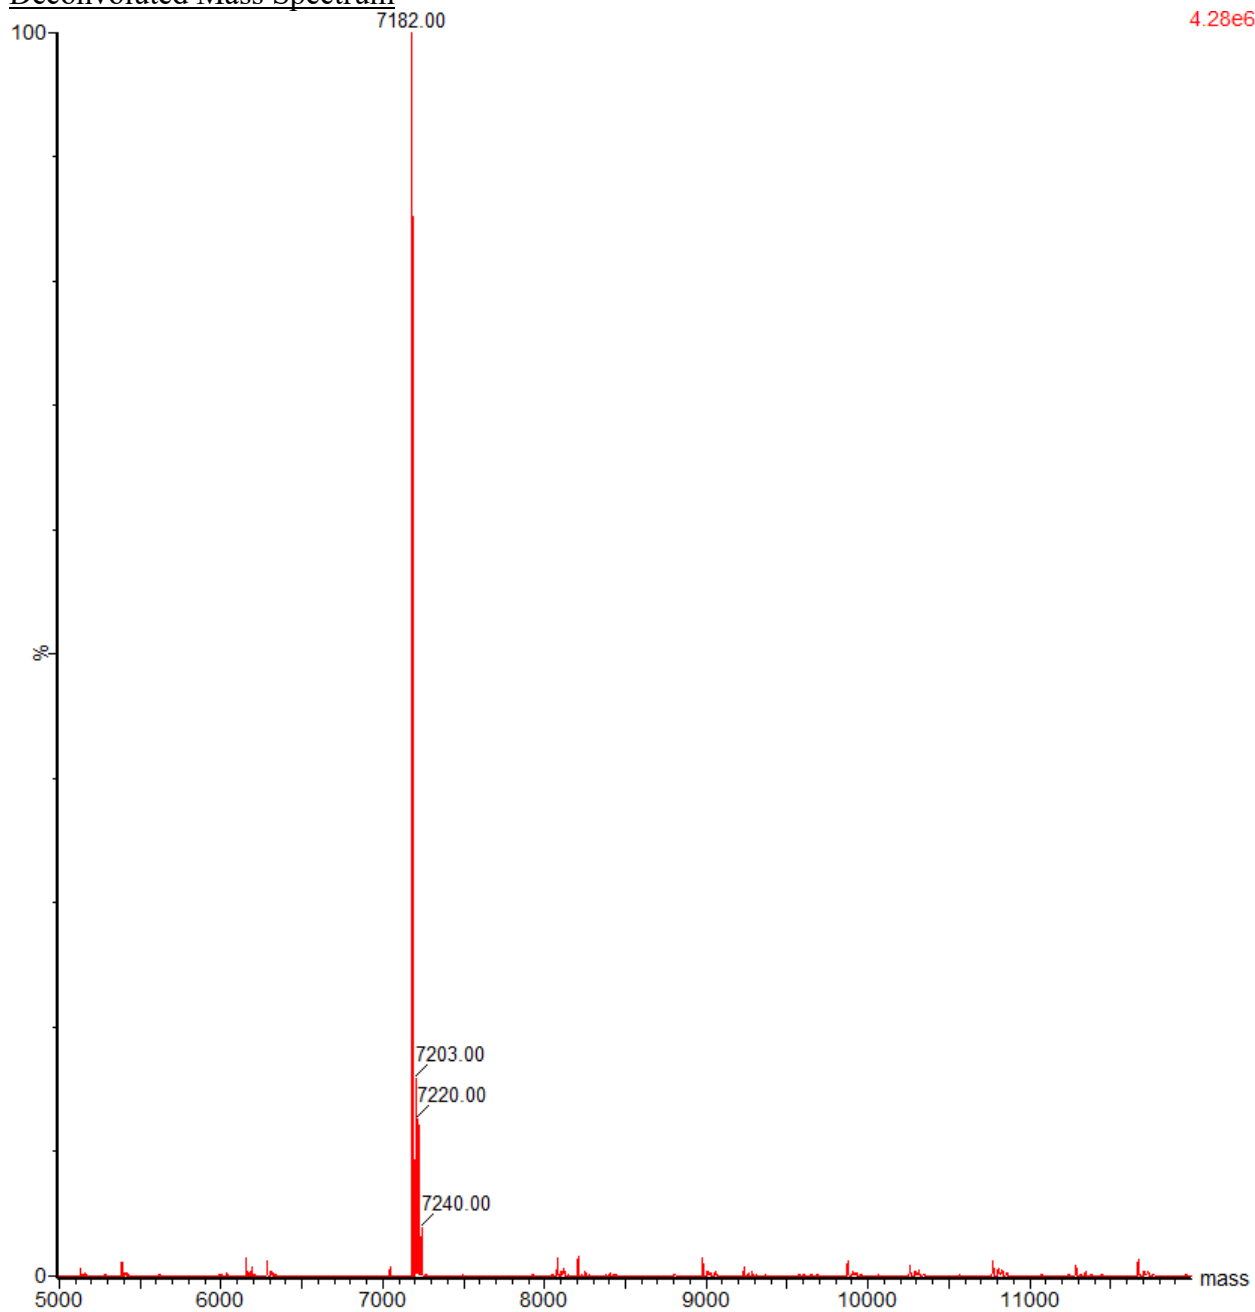

## LCMS Characterization of 27

Using  $\Psi$ -5

Produced from **1** by General Procedure **2**:

Yield (A260): 79%

Expected Mass: 6985.563

Expected (M-6)/6 Ion: 1163.26

Found Deconvoluted Mass: 6986.00

Found (M-6)/6 Ion: 1163.01

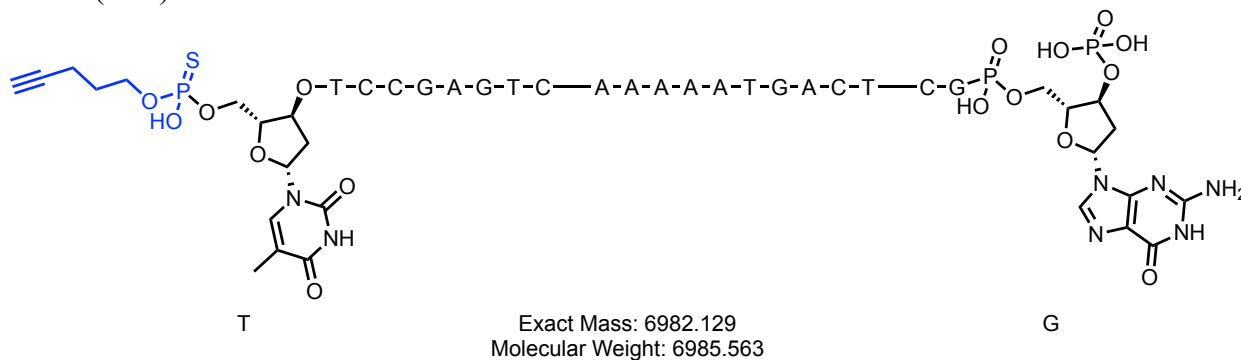

## A260 Chromatogram

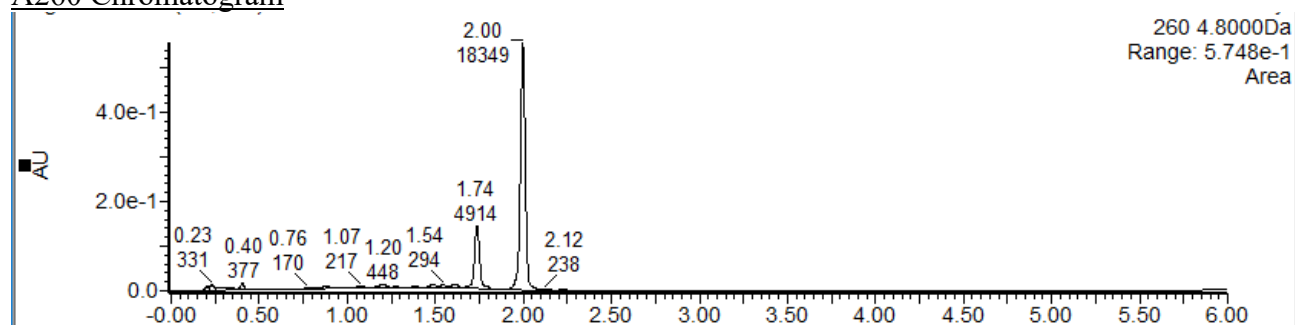

Mass Spectrum (RT= 3.38 min)

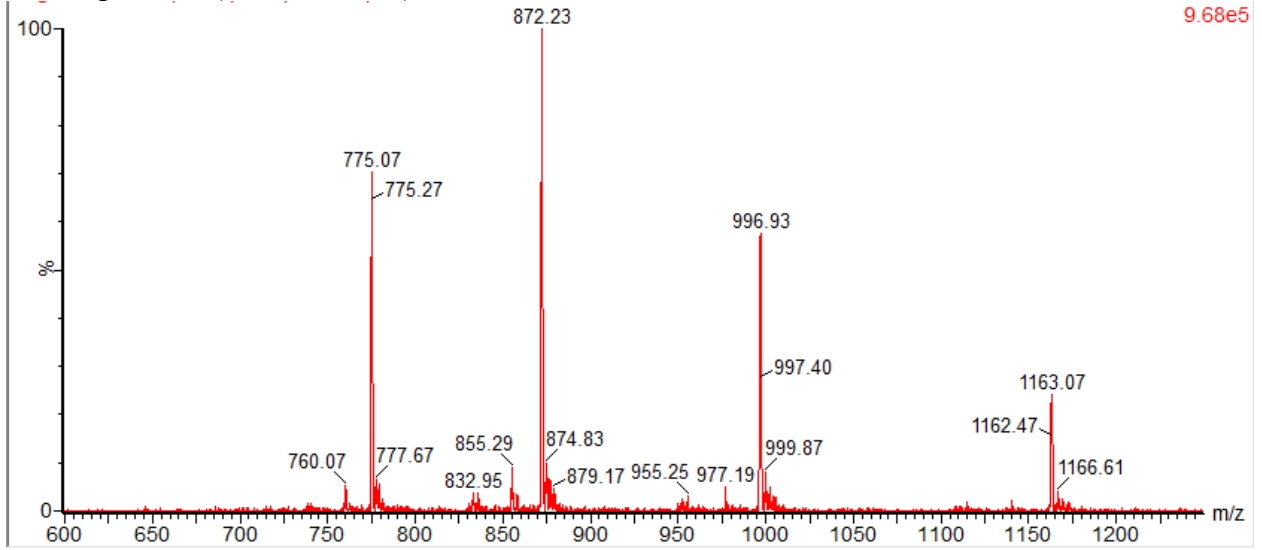

Deconvoluted Mass Spectrum

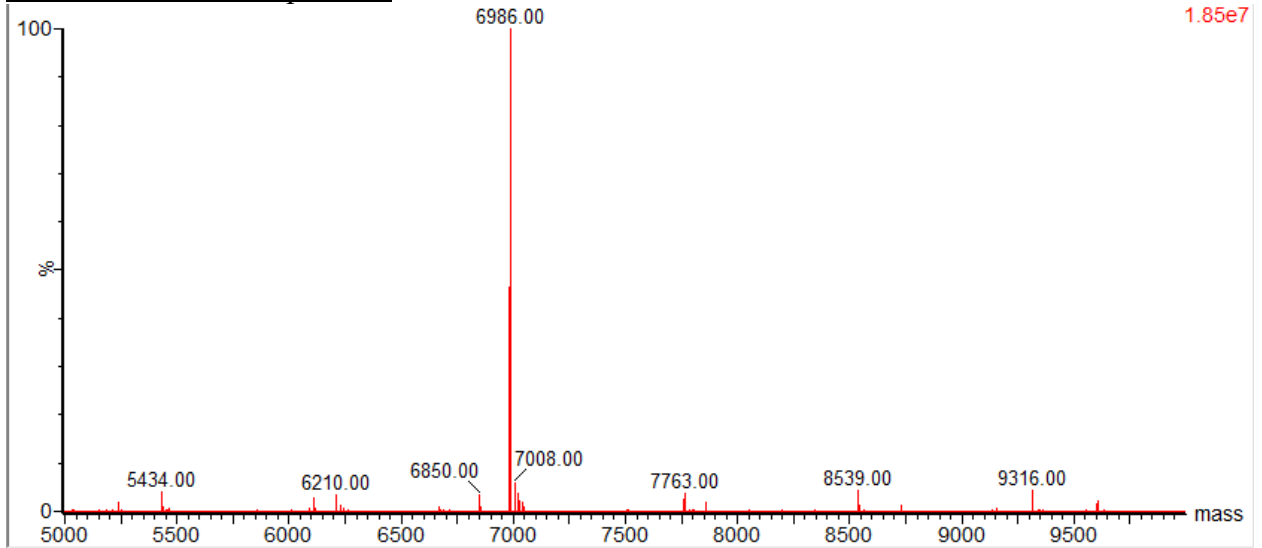

## LCMS Characterization of 28

Produced from **2** by General Procedure **2**:

Using **Ψ-5**

Yield (A260): 84%

Expected Mass: 6985.53

Expected (M-6)/6 Ion: 1163.255

Found Deconvoluted Mass: 6986.00

Found (M-6)/6 Ion: 1163.07

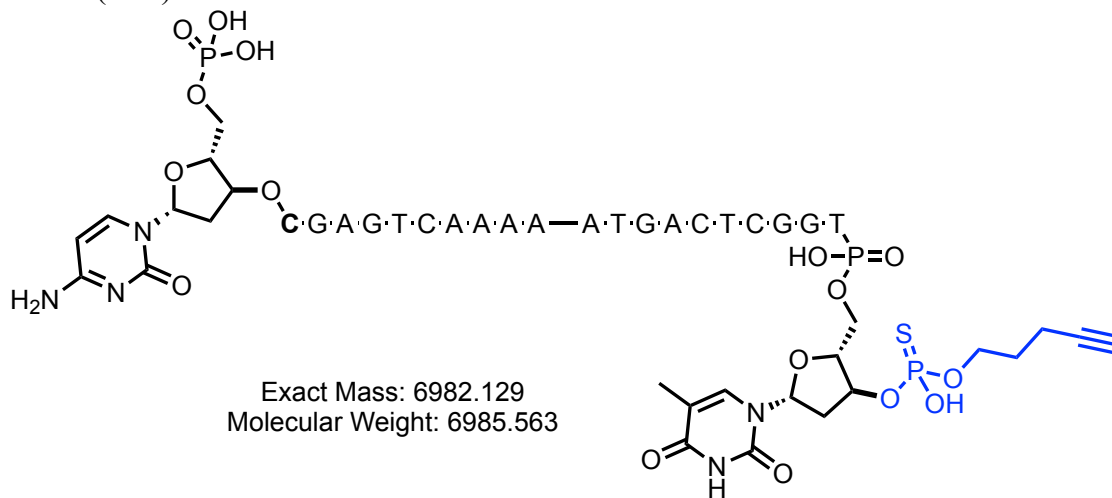

## A260 Chromatogram

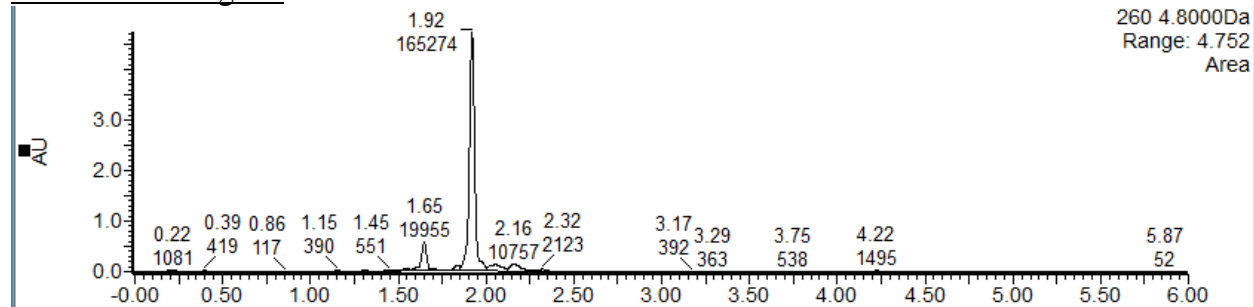

Mass Spectrum (RT= 1.92 min)

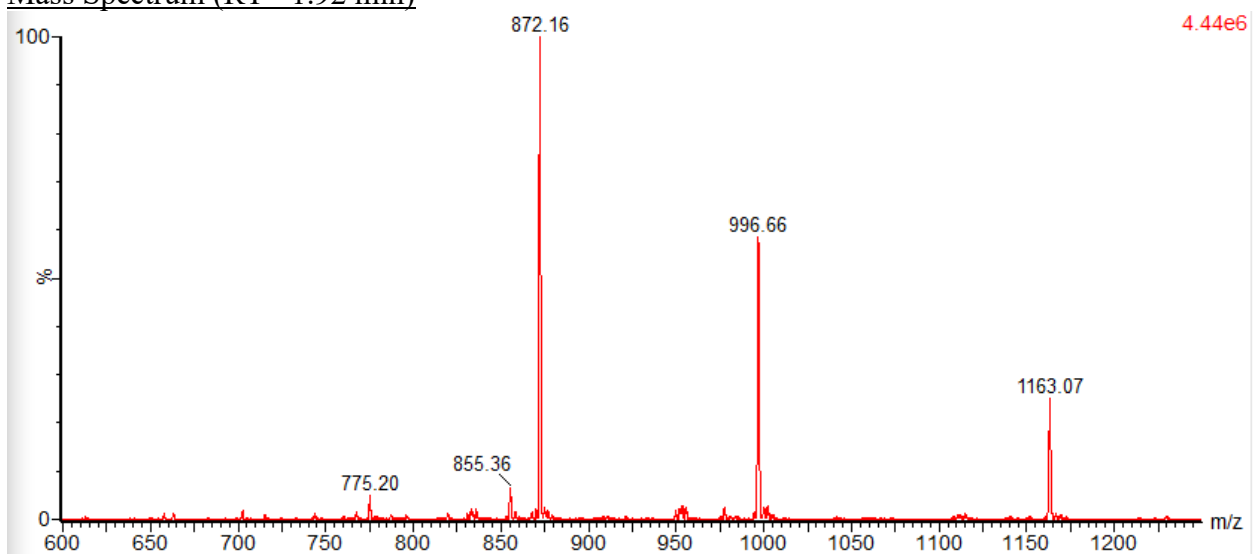

Deconvoluted Mass Spectrum

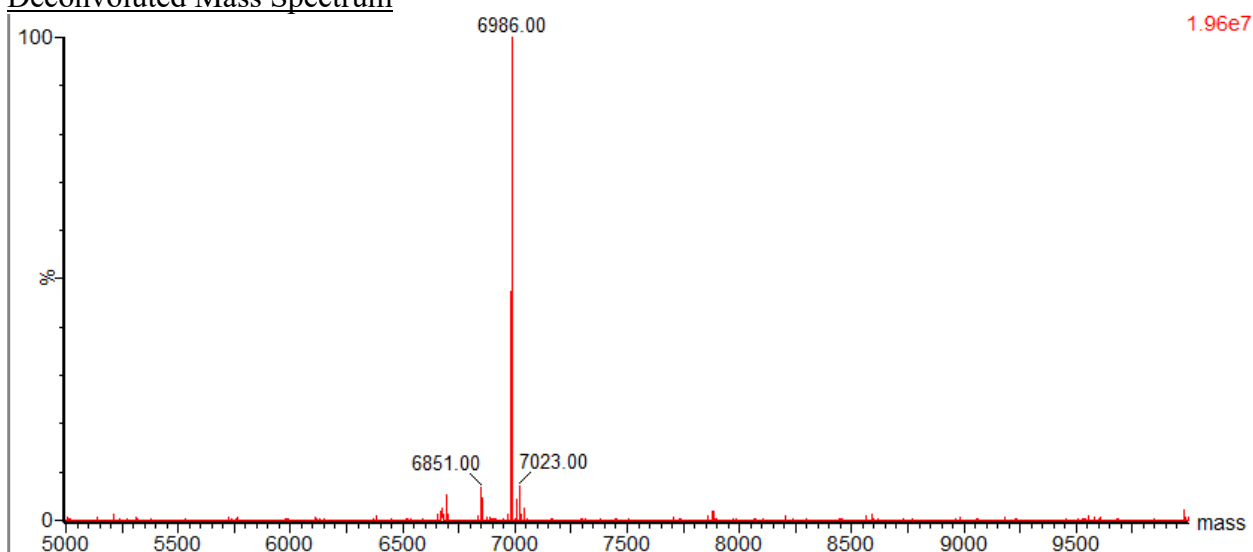



Mass Spectrum (RT= 3.38 min)

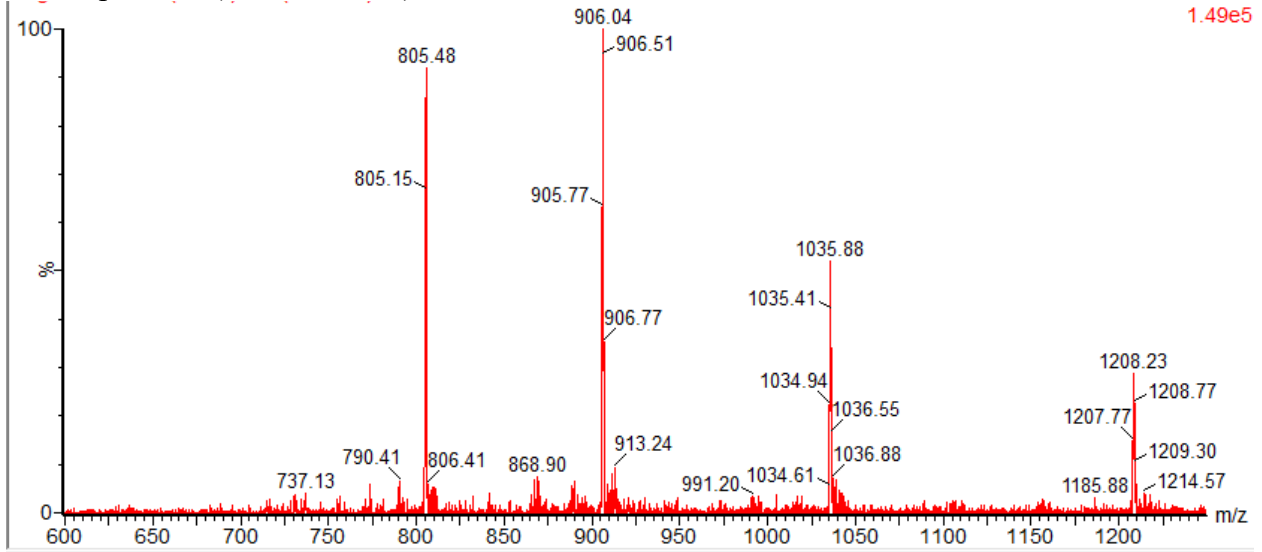

Deconvoluted Mass Spectrum

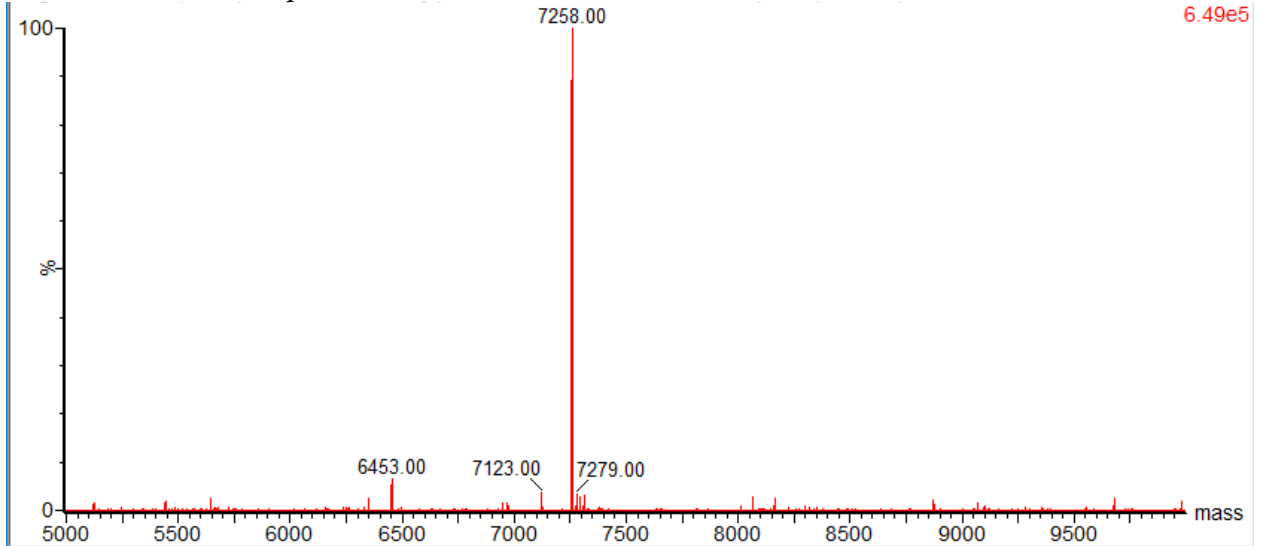



## LCMS Characterization of 30

Produced from **2** by General Procedure **2**:

Using **Ψ-9**

Yield (A260): 78%

Expected Mass: 7257.939

Expected (M-6)/6 Ion: 1208.662

Found Deconvoluted Mass: 7258.00

Found (M-6)/6 Ion: 1208.57

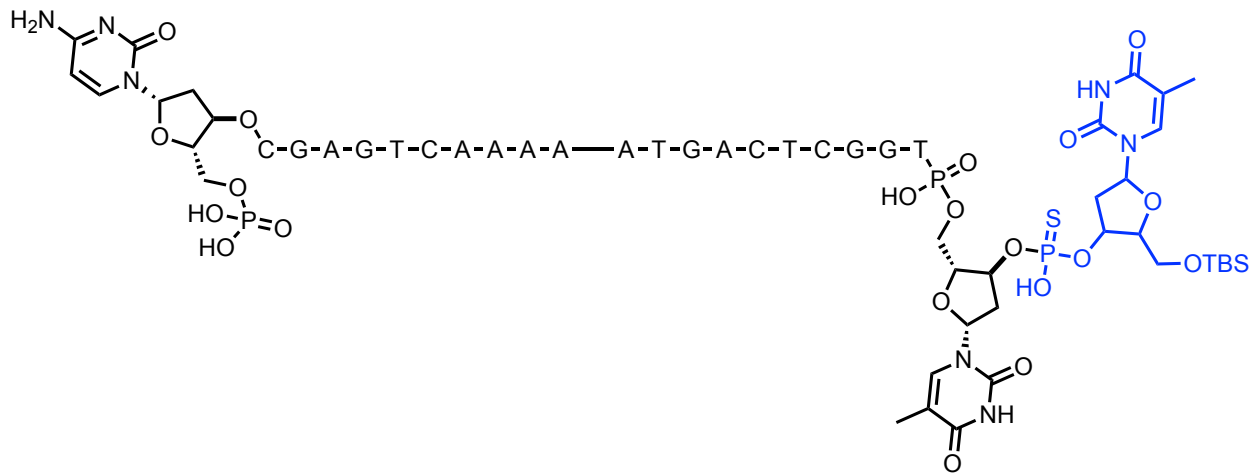

Exact Mass: 7254.248  
Molecular Weight: 7257.939

## A260 Chromatogram

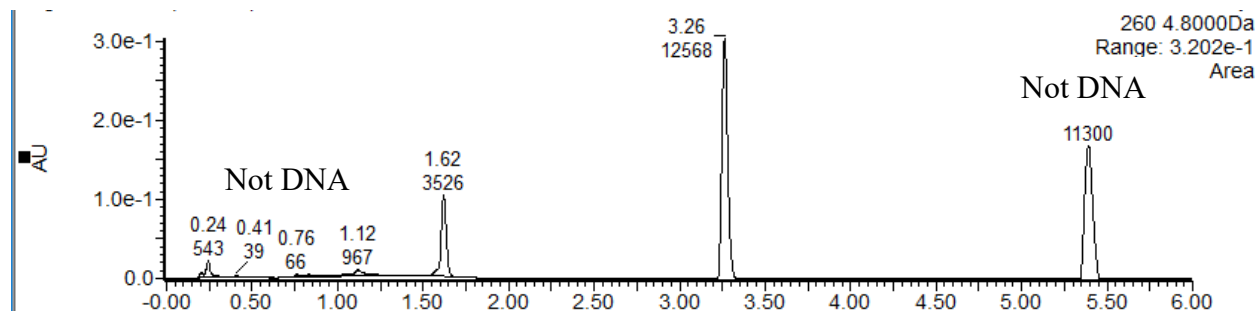

Mass Spectrum (RT= 3.26 min)

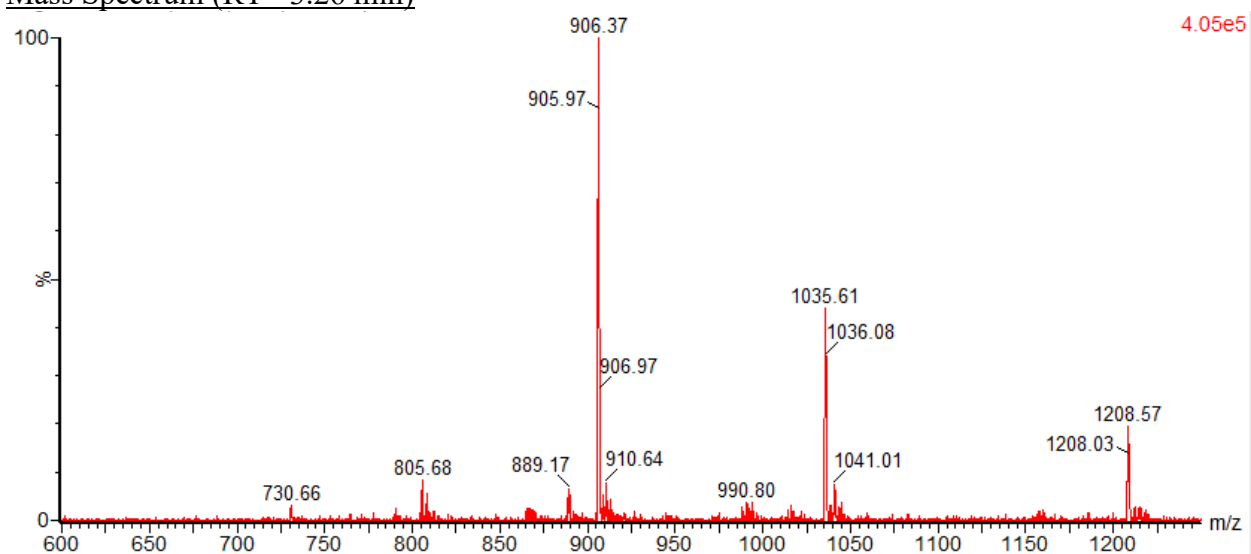

Deconvoluted Mass Spectrum

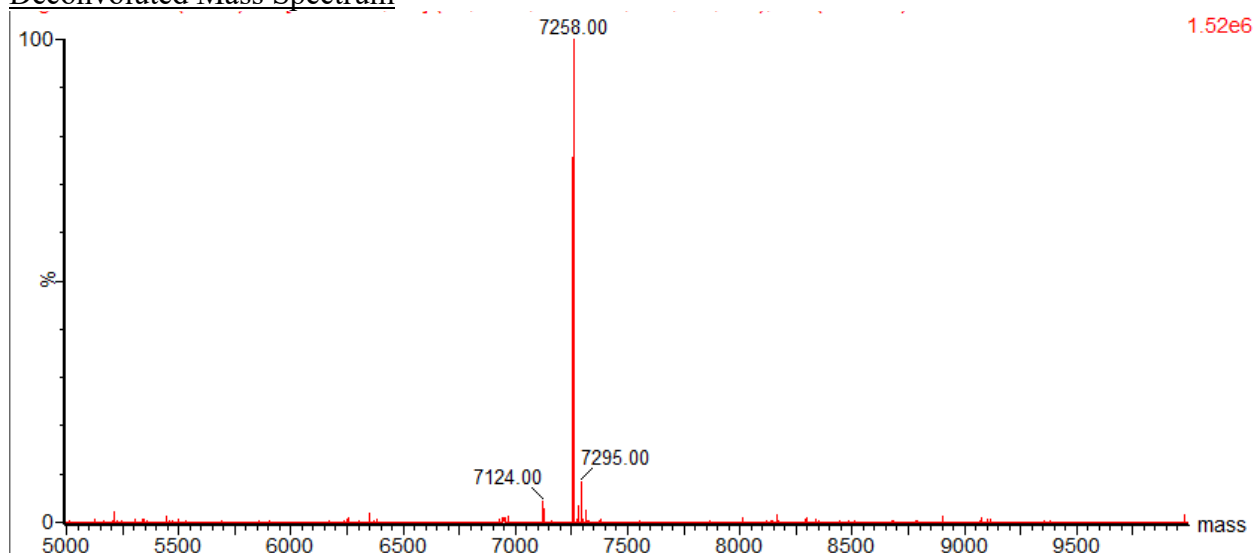

## LCMS Characterization of 31

Produced from **1** by General Procedure **2**:

Using **Ψ-6**

Yield (A260): 75%

Expected Mass: 7101.50

Expected (M-6)/6 Ion: 1182.6

Found Deconvoluted Mass: 7102.00

Found (M-6)/6 Ion: 1182.21

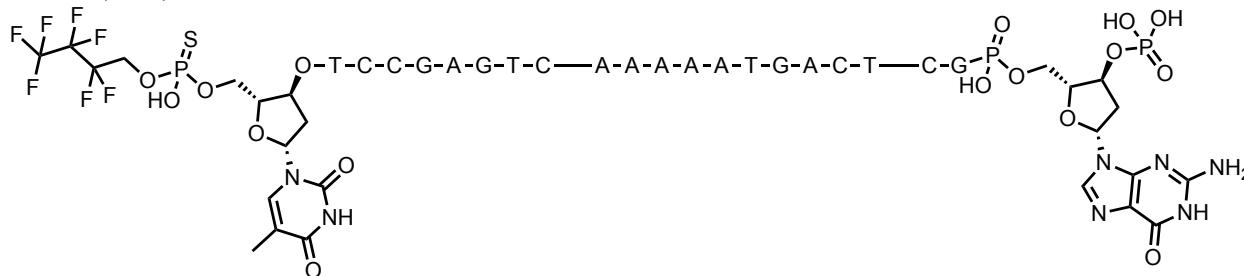

Exact Mass: 7098.08  
Molecular Weight: 7101.50

### A260 Chromatogram

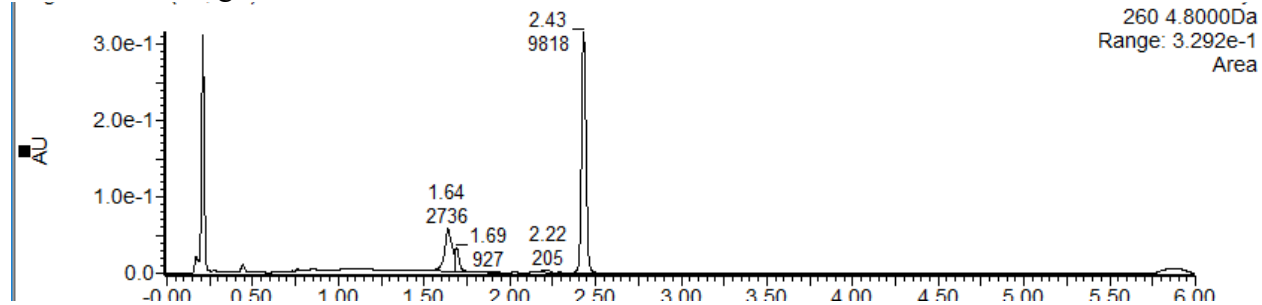

Mass Spectrum (RT= 2.43 min)

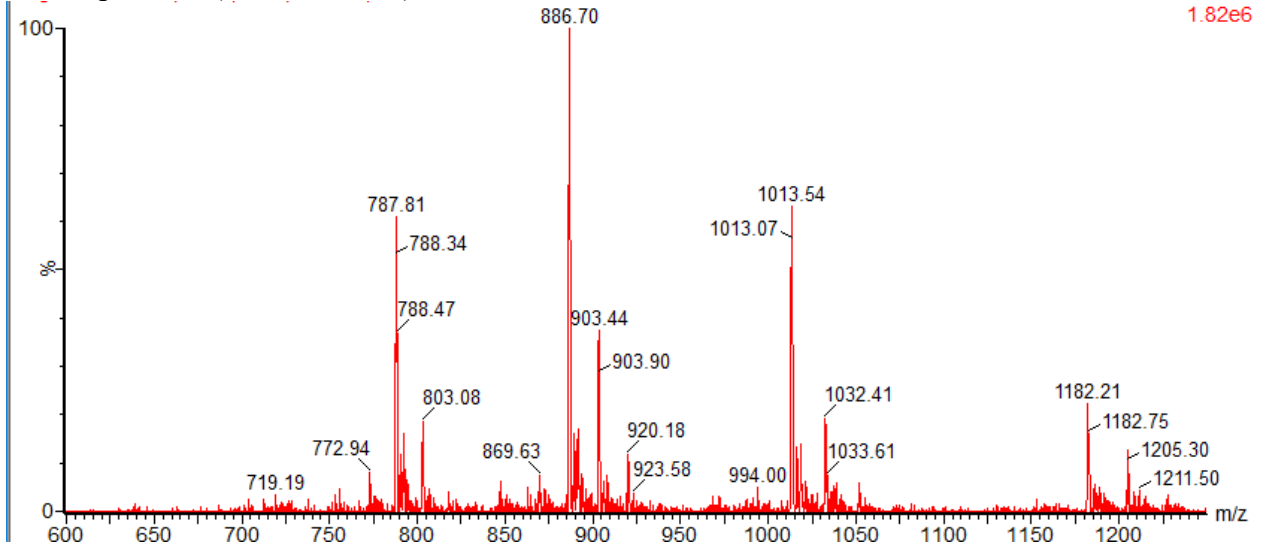

Deconvoluted Mass Spectrum

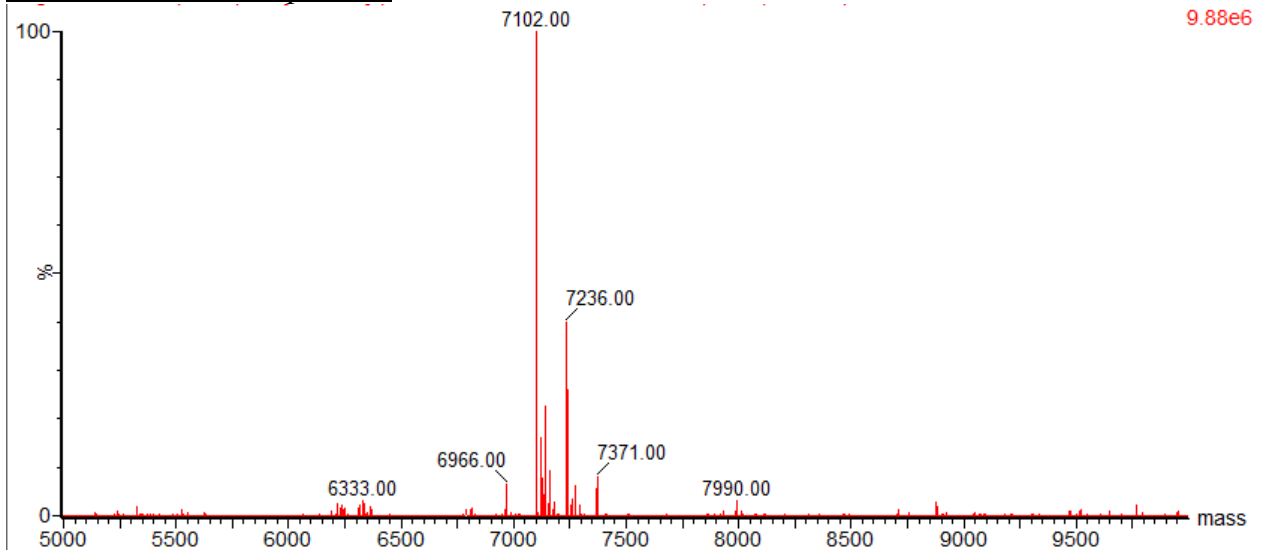

## LCMS Characterization of 32

Produced from **2** by General Procedure **2**:

Using **Ψ-6**

Yield (A260): 74%

Expected Mass: 7101.5

Expected (M-6)/6 Ion: 1182.01

Found Deconvoluted Mass: 7102.00

Found (M-6)/6 Ion: 1182.2

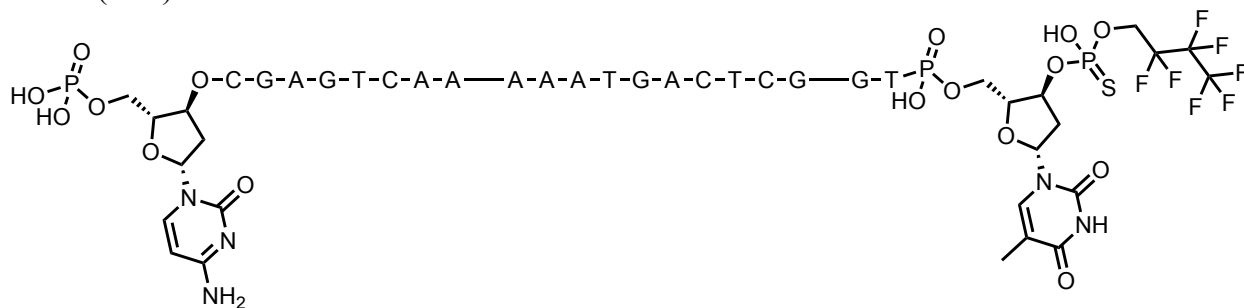

Exact Mass: 7098.08  
Molecular Weight: 7101.50

### A260 Chromatogram

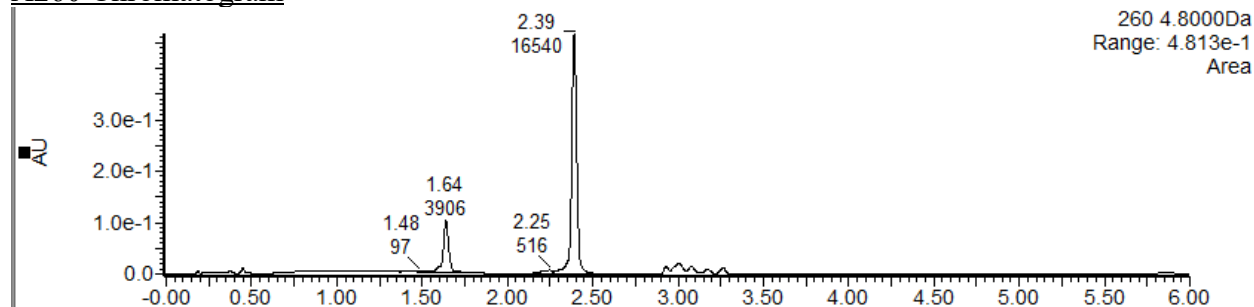

### Mass Spectrum (RT= 2.39 min)

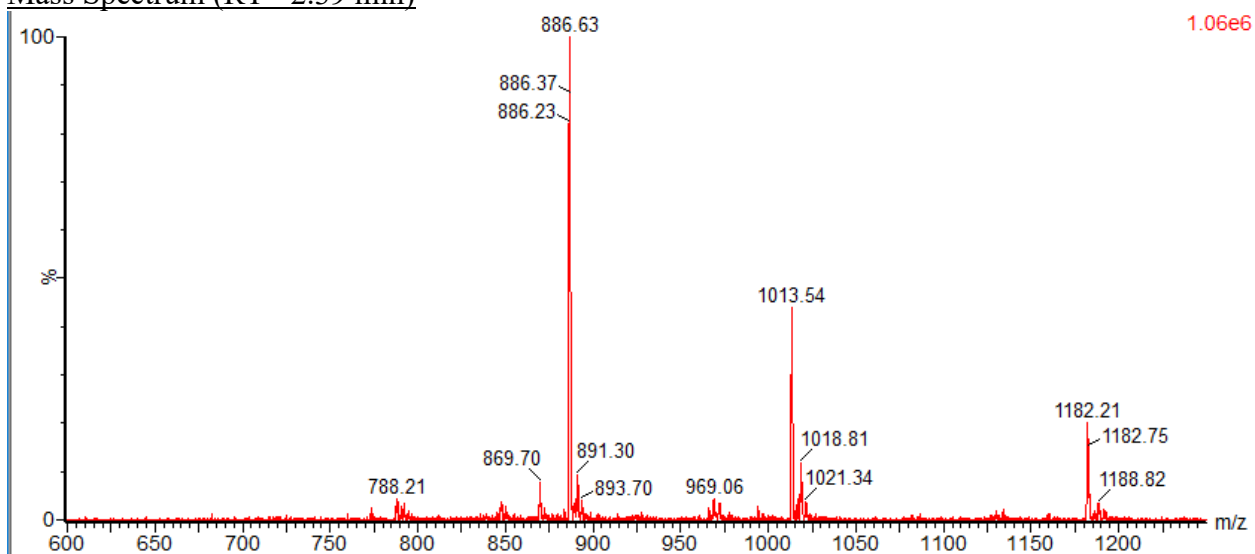

### Deconvoluted Mass Spectrum

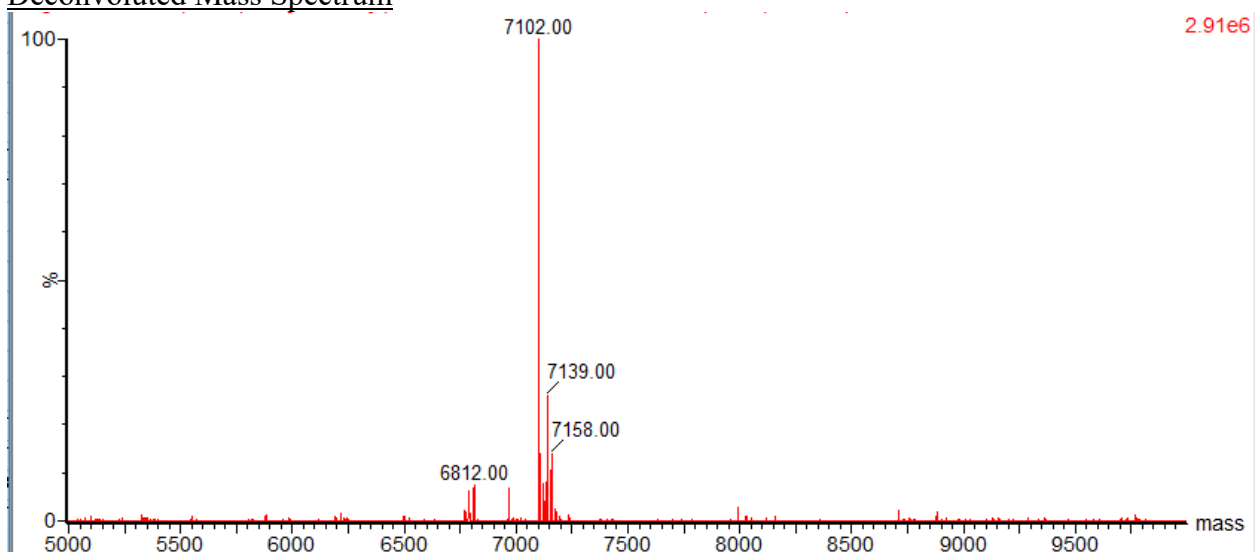

## LCMS Characterization of 33

Produced from **1** by General Procedure **2**:

Using  $\Psi$ -7

Yield (A260): 90%

Expected Mass: 7203.790

Expected (M-6)/6 Ion: 1199.63

Found Deconvoluted Mass: 7204.00

Found (M-6)/6 Ion: 1199.23

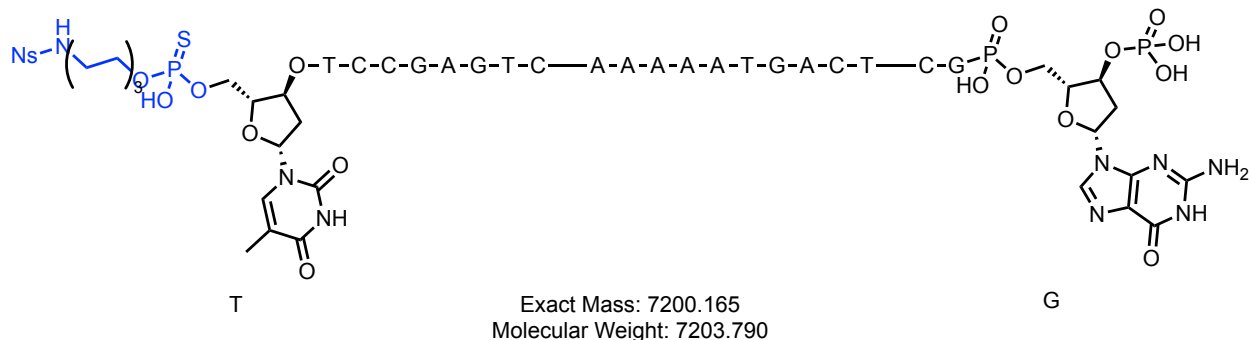

### A260 Chromatogram

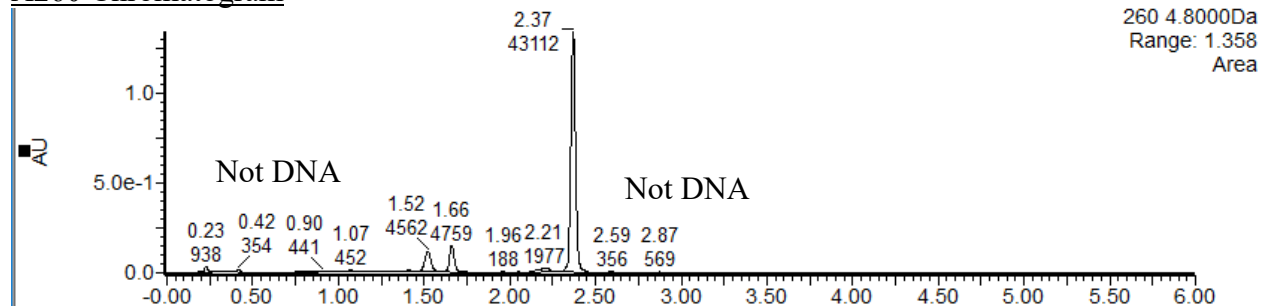

Mass Spectrum (RT= 2.37 min)

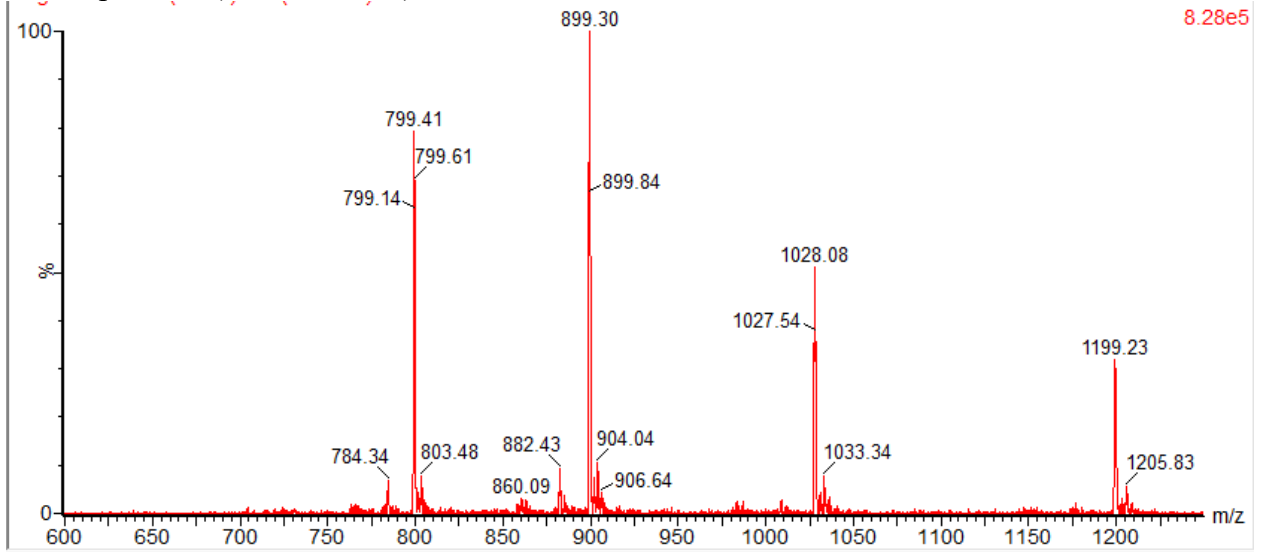

Deconvoluted Mass Spectrum

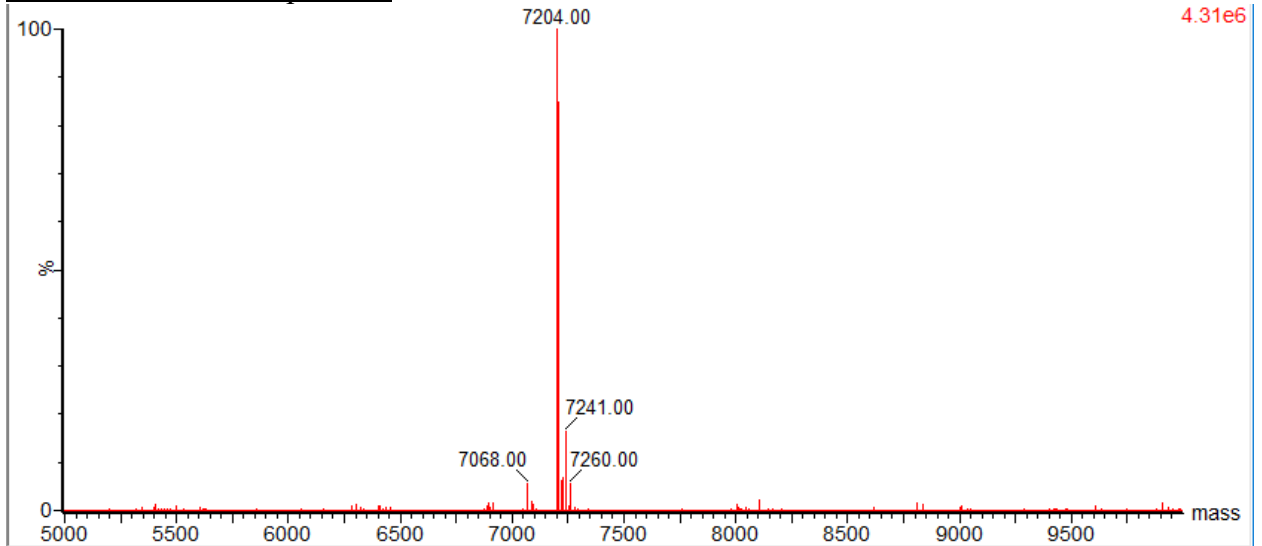



## LCMS Characterization of 34

Produced from **2** by General Procedure **1**:

Using  $\Psi$ -7

Yield (A260): 84%

Expected Mass: 7203.79

Expected (M-6)/6 Ion: 1199.63

Found Deconvoluted Mass: 7204.00

Found (M-6)/6 Ion: 199.29

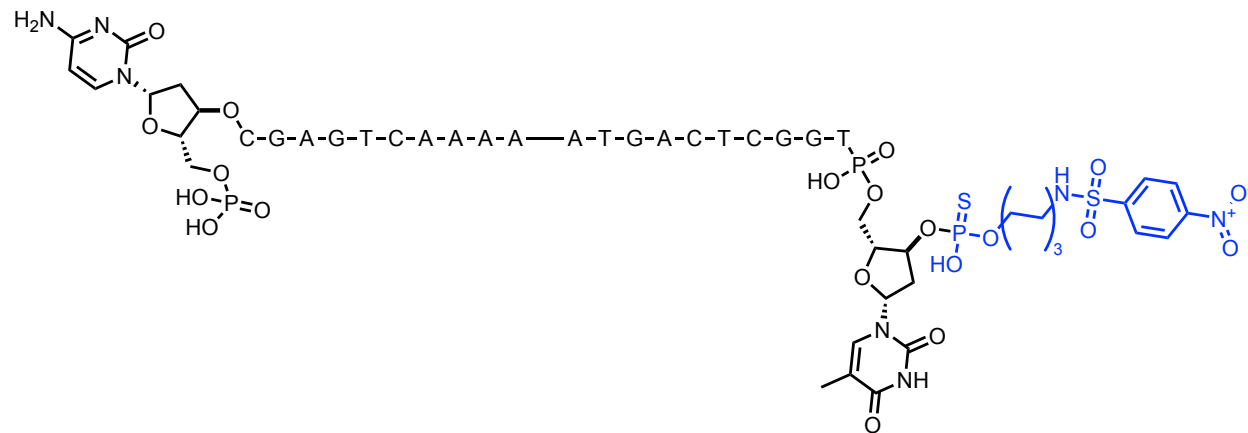

Exact Mass: 7200.165  
Molecular Weight: 7203.790

## A260 Chromatogram

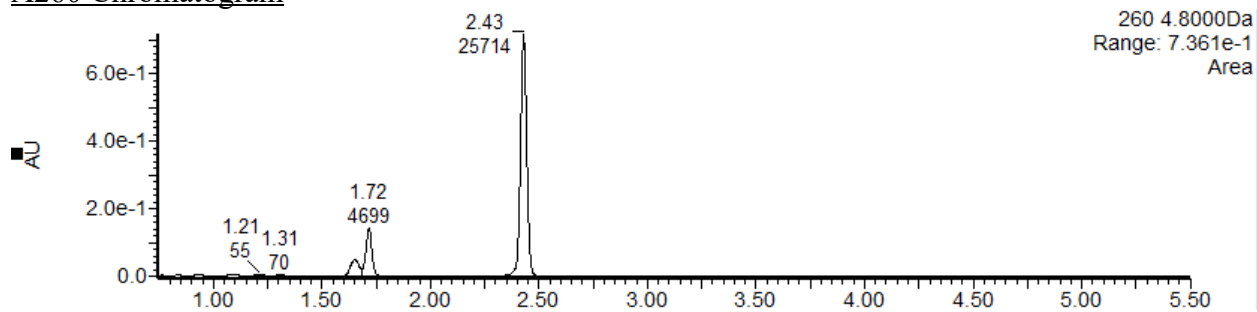

Mass Spectrum (RT=2.43 min)

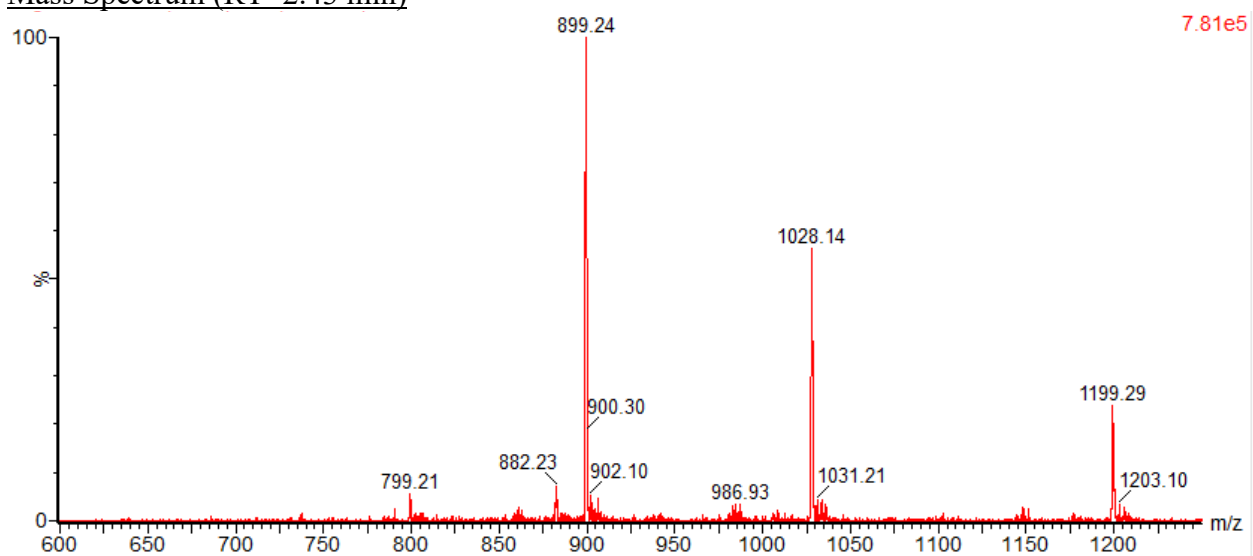

Deconvoluted Mass Spectrum

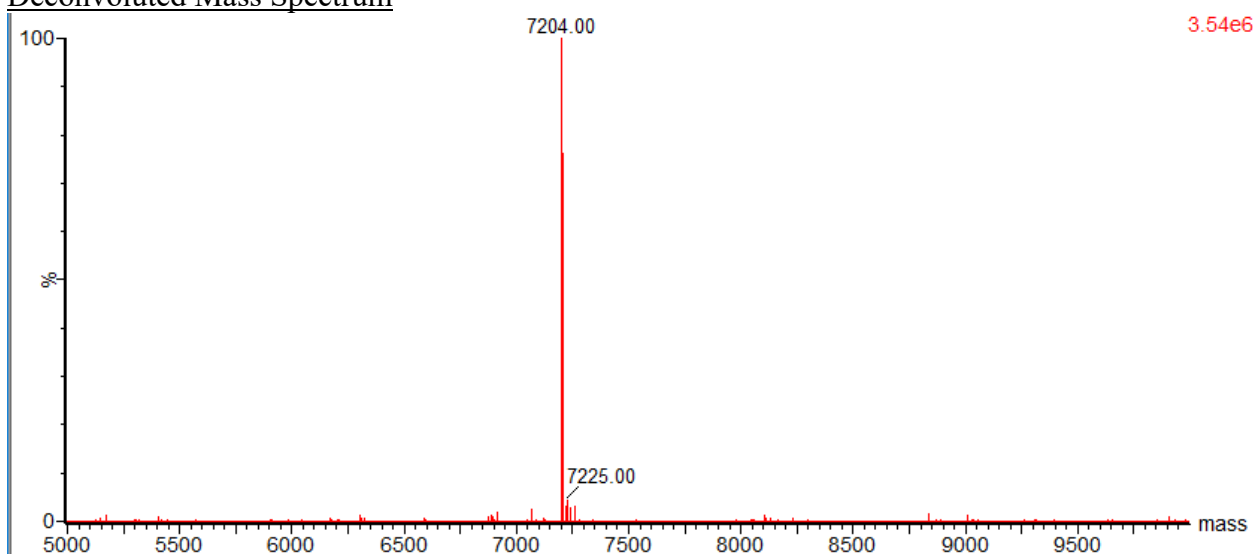



Mass Spectrum (RT= 2.70 min)

1.09e6

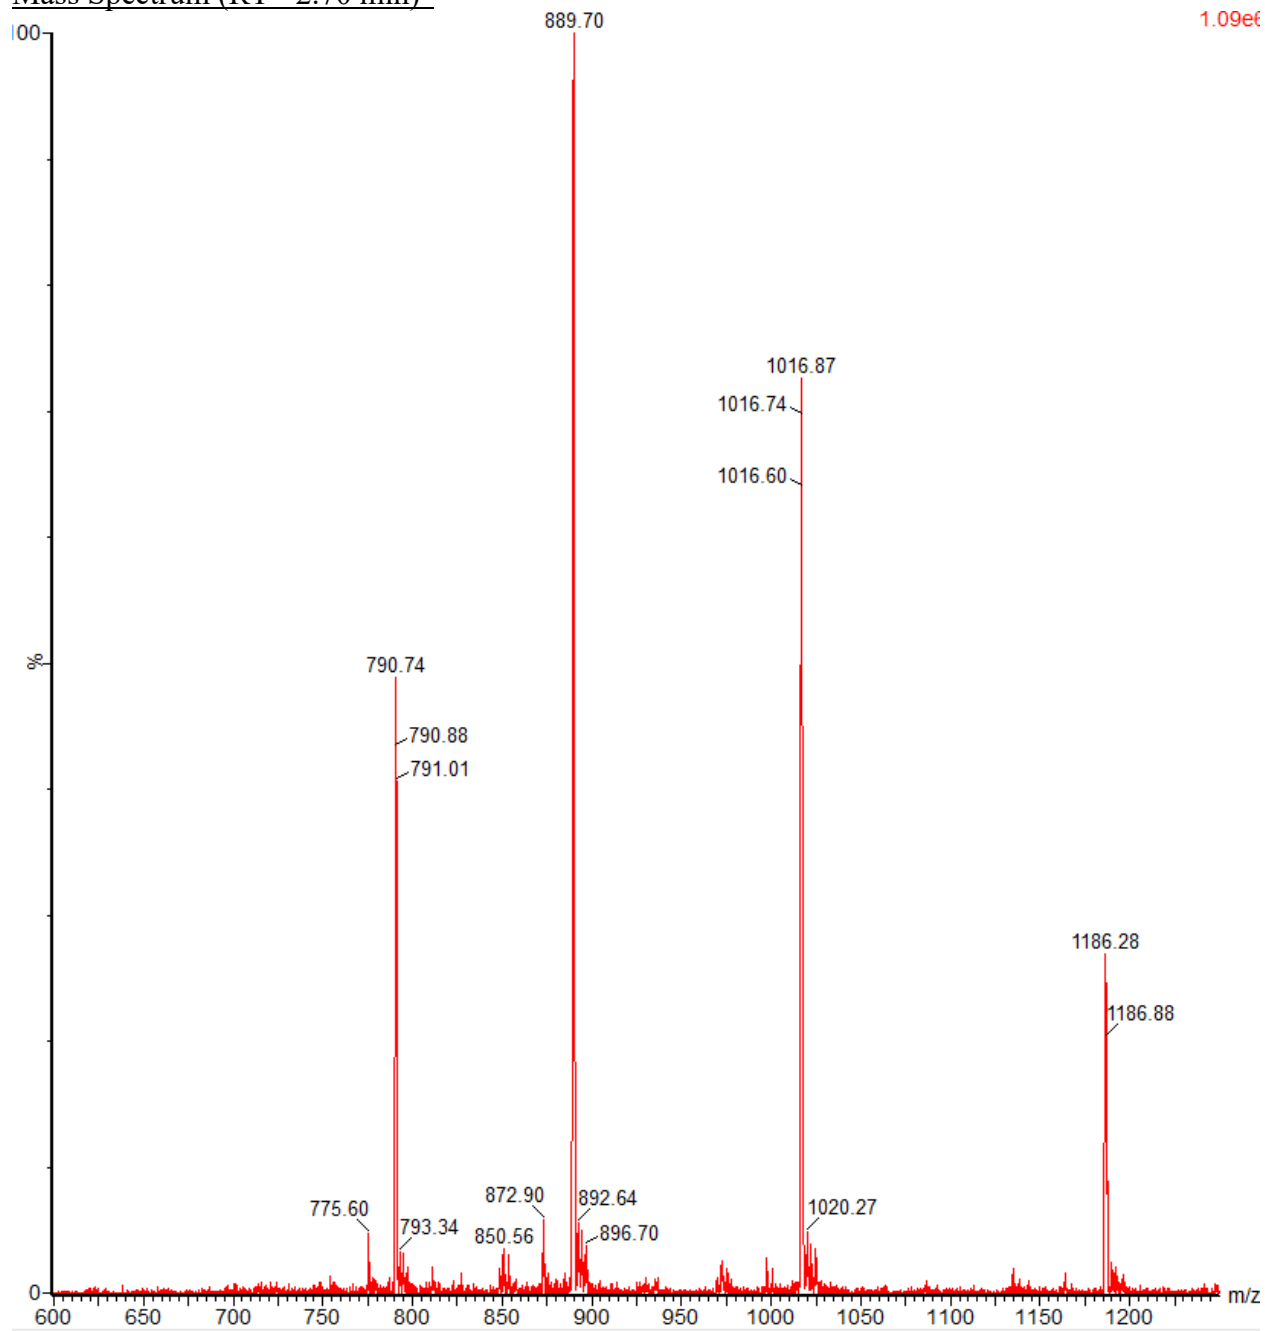

# Deconvoluted Mass Spectrum

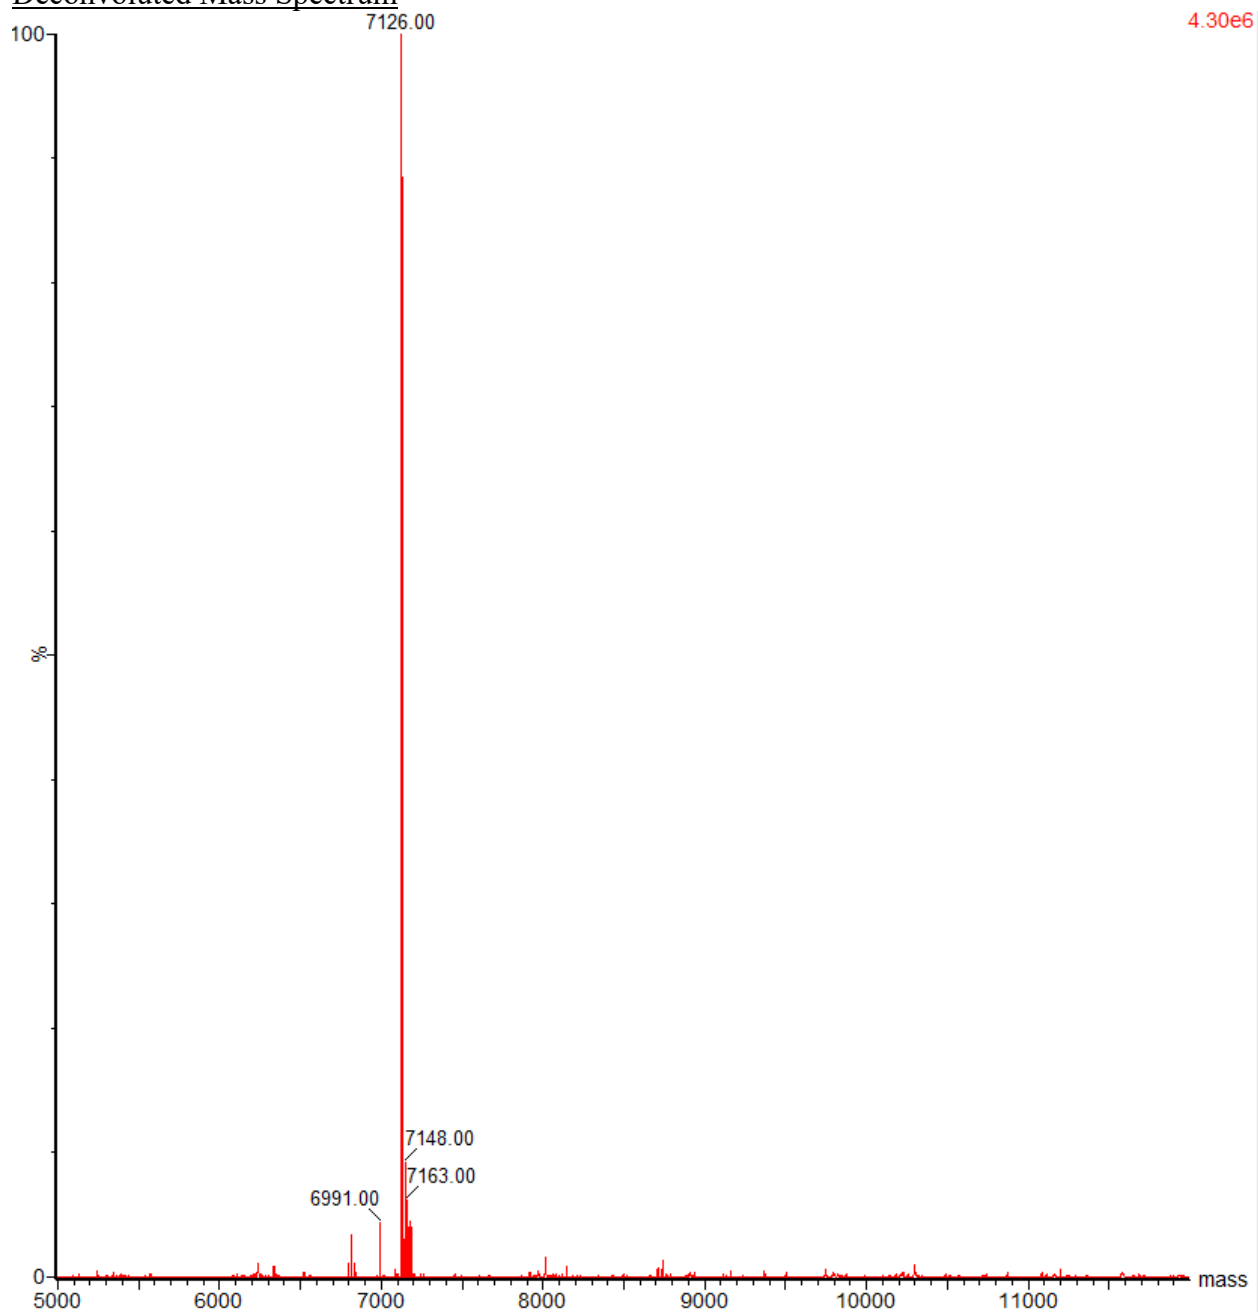

## LCMS Characterization of 35

Using  $\Psi$ -16

Produced from **2** by General Procedure **2**:

Yield (A260): 64%

Expected Mass: 7126.17

Expected (M-6)/6 Ion: 1186.03

Found Deconvoluted Mass: 7126.0

Found (M-6)/6 Ion: 1186.42

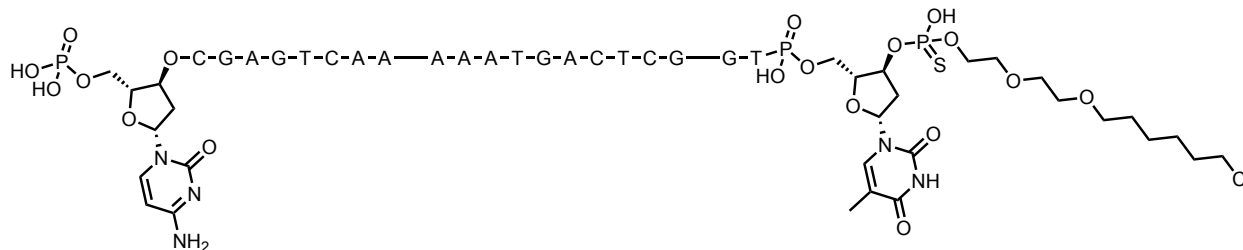

### A260 Chromatogram

Oligo03752

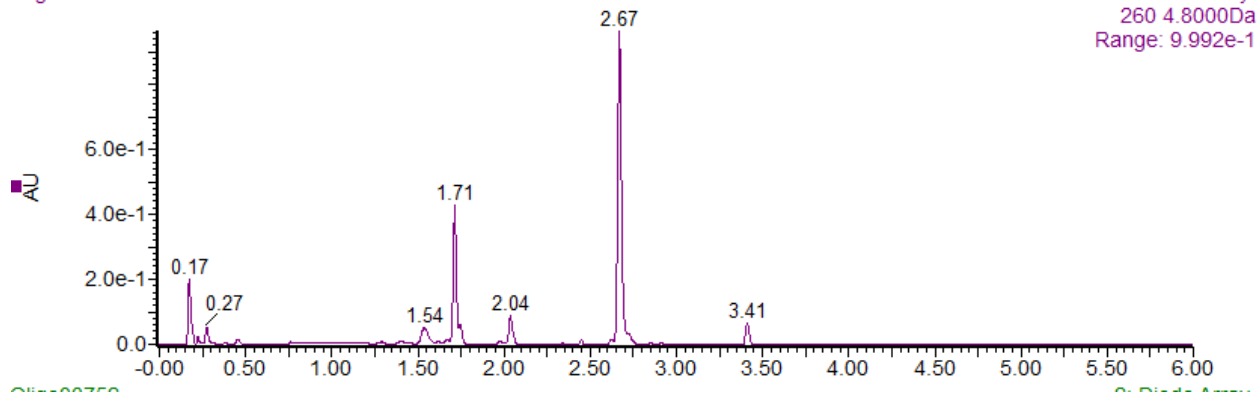

### TIC

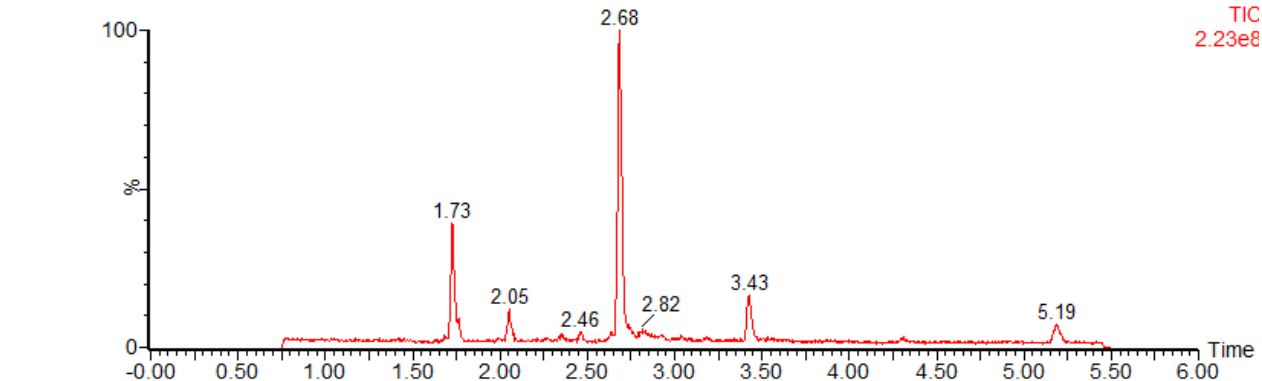

Mass Spectrum (RT= 2.27 min)

1.12e6

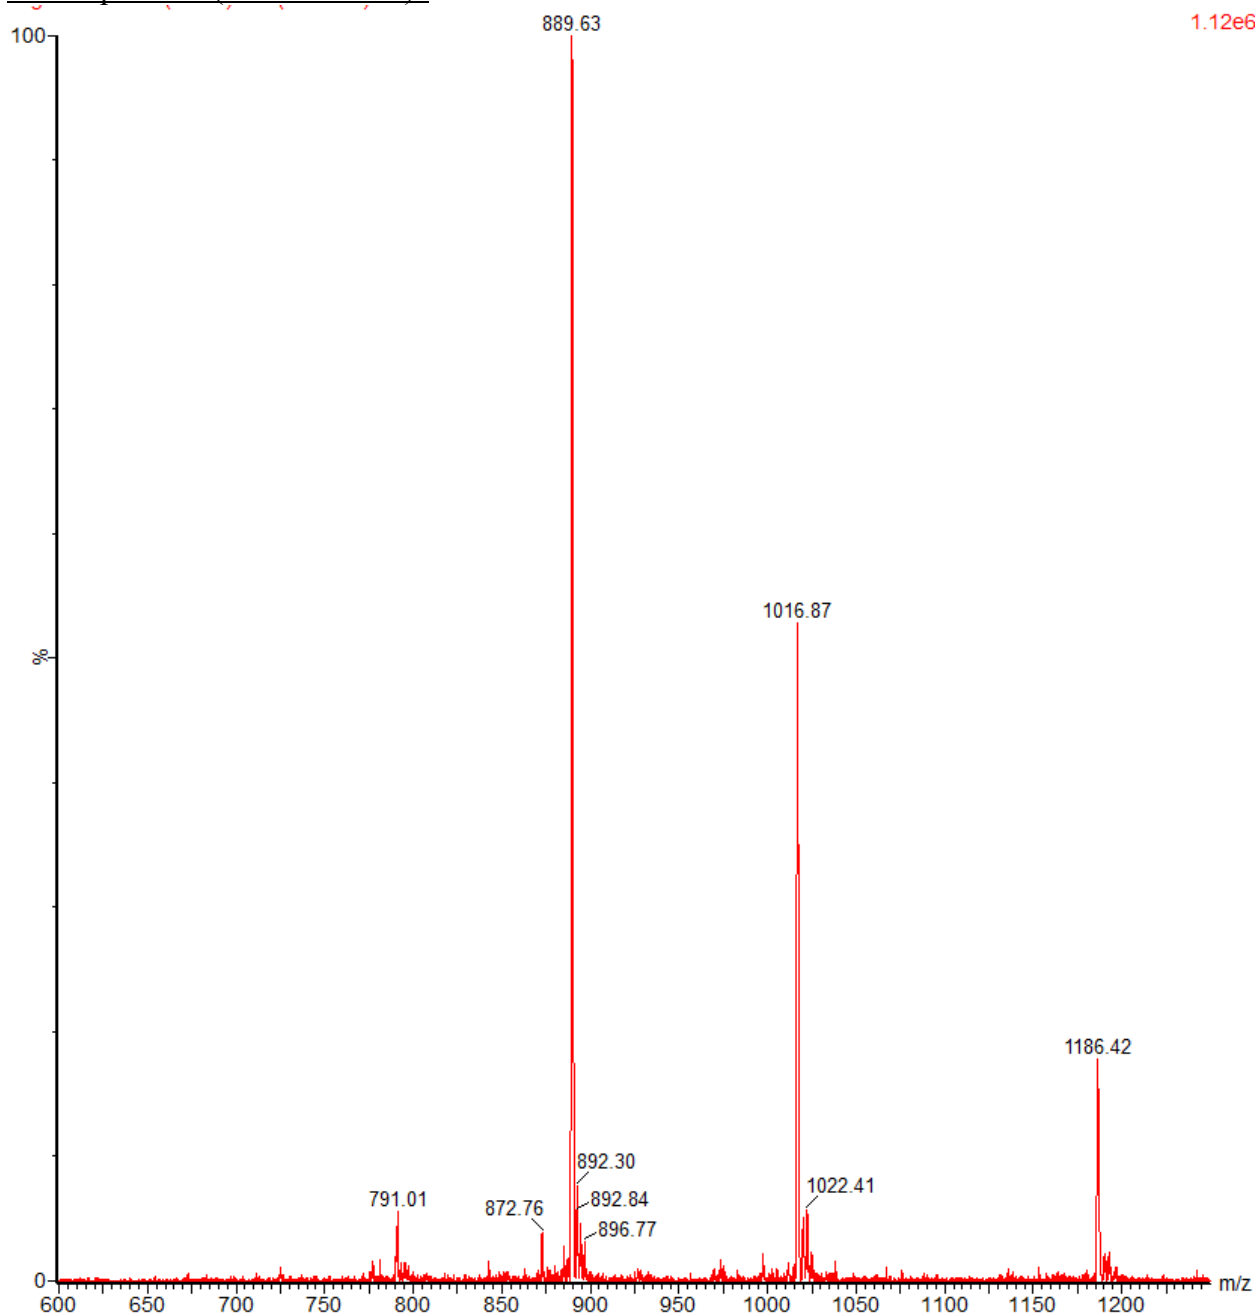

# Deconvoluted Mass Spectrum

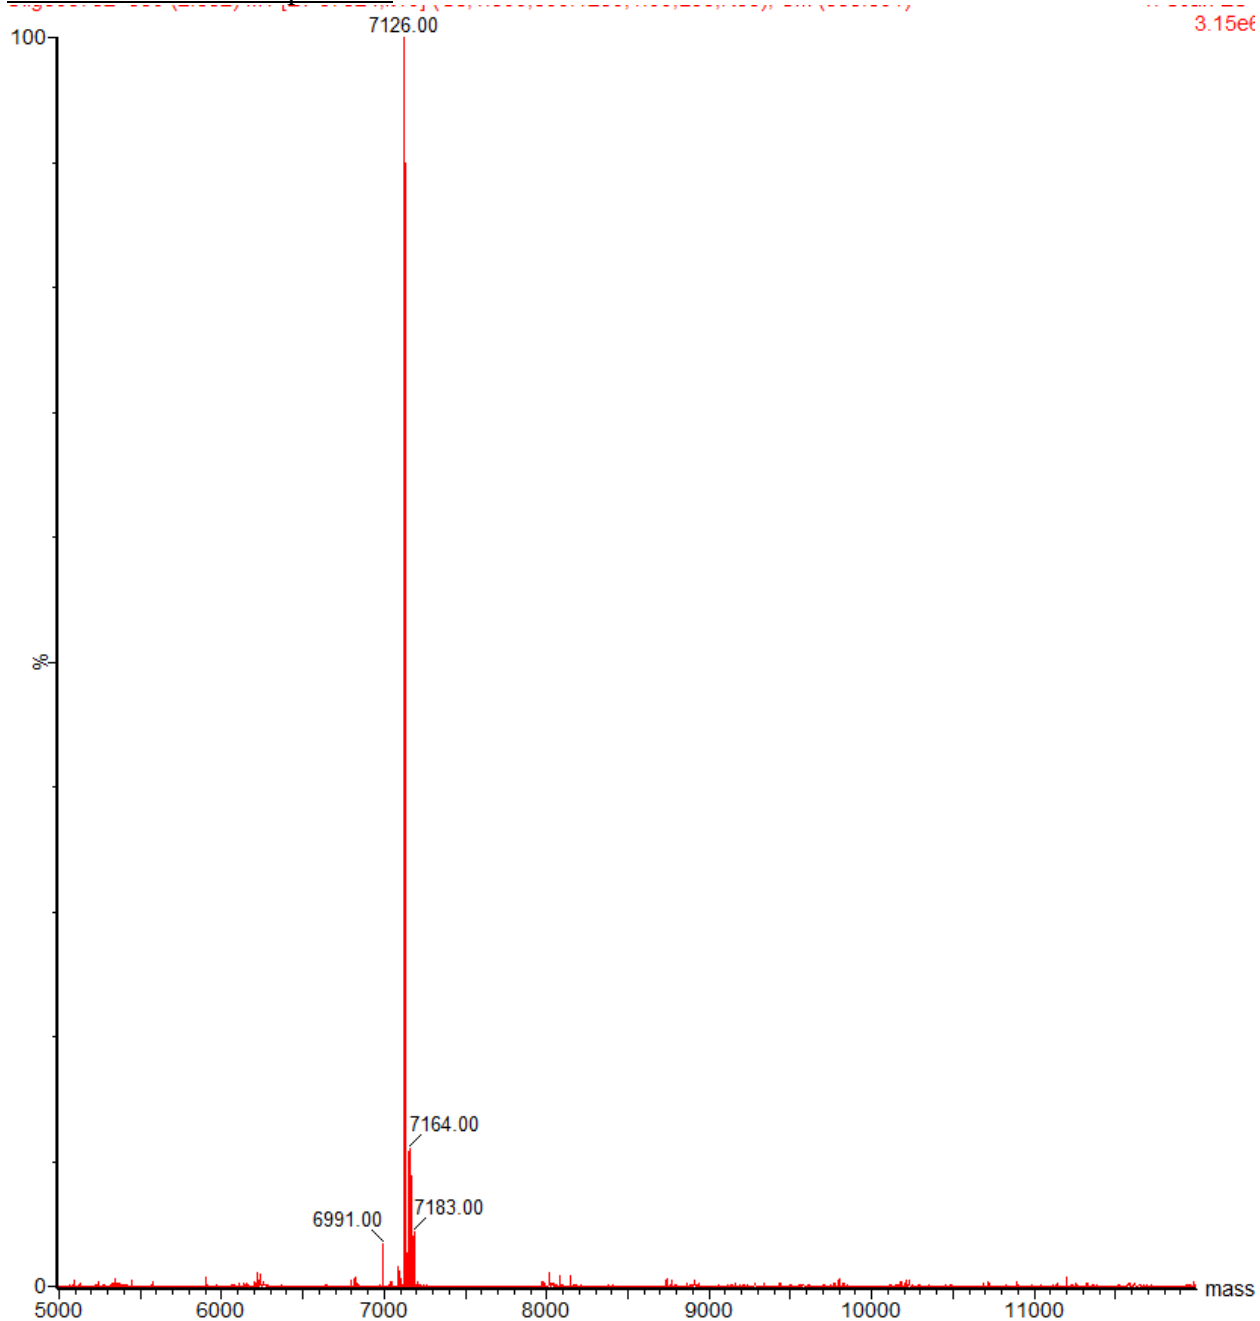



## LCMS Characterization of 37

Produced from **1** by General Procedure **2**:

Using **Ψ-10**

Yield (A260): 76%

Expected Mass: 7269.9

Expected (M-6)/6 Ion: 1210.65

Found Deconvoluted Mass: 7270.0

Found (M-6)/6 Ion: 1210.5

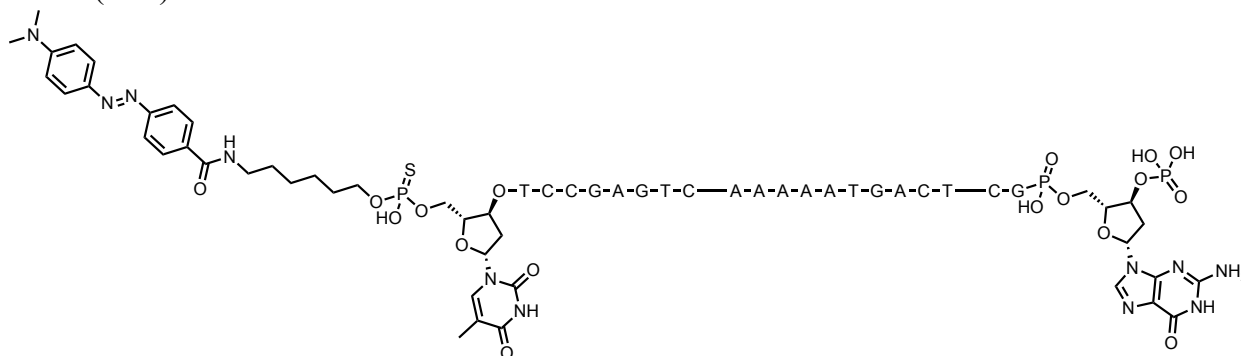

### A260 Chromatogram

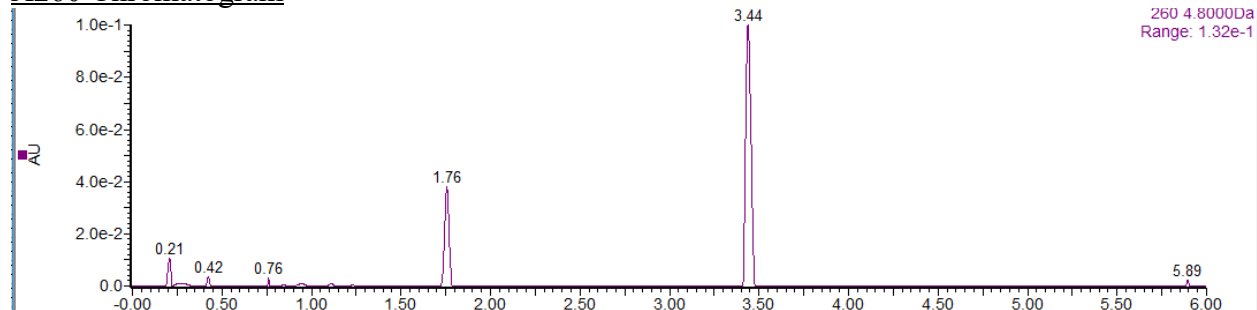

Mass Spectrum (RT= 3.44 min)

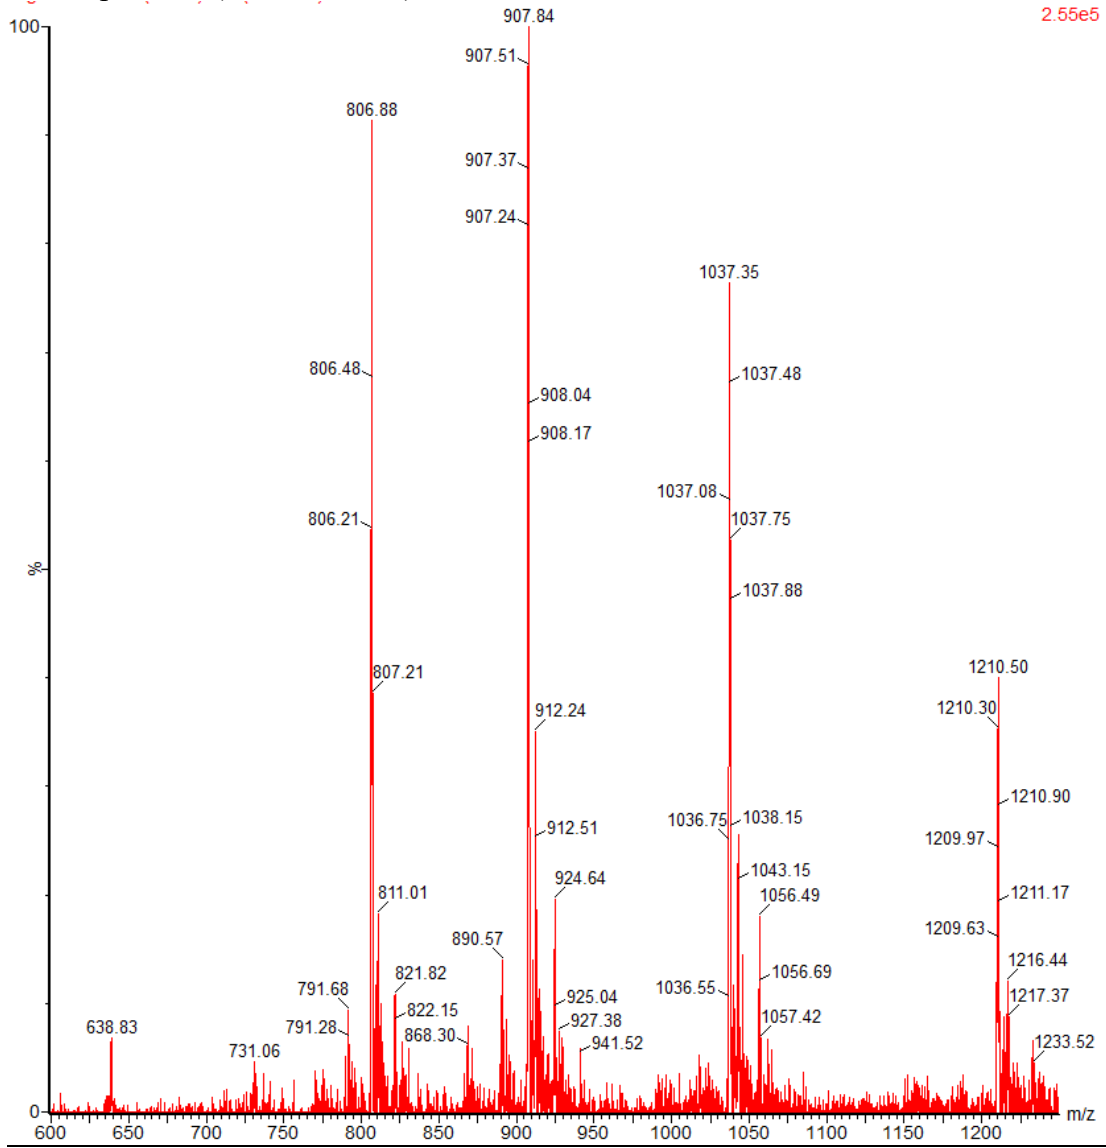

# Deconvoluted Mass Spectrum

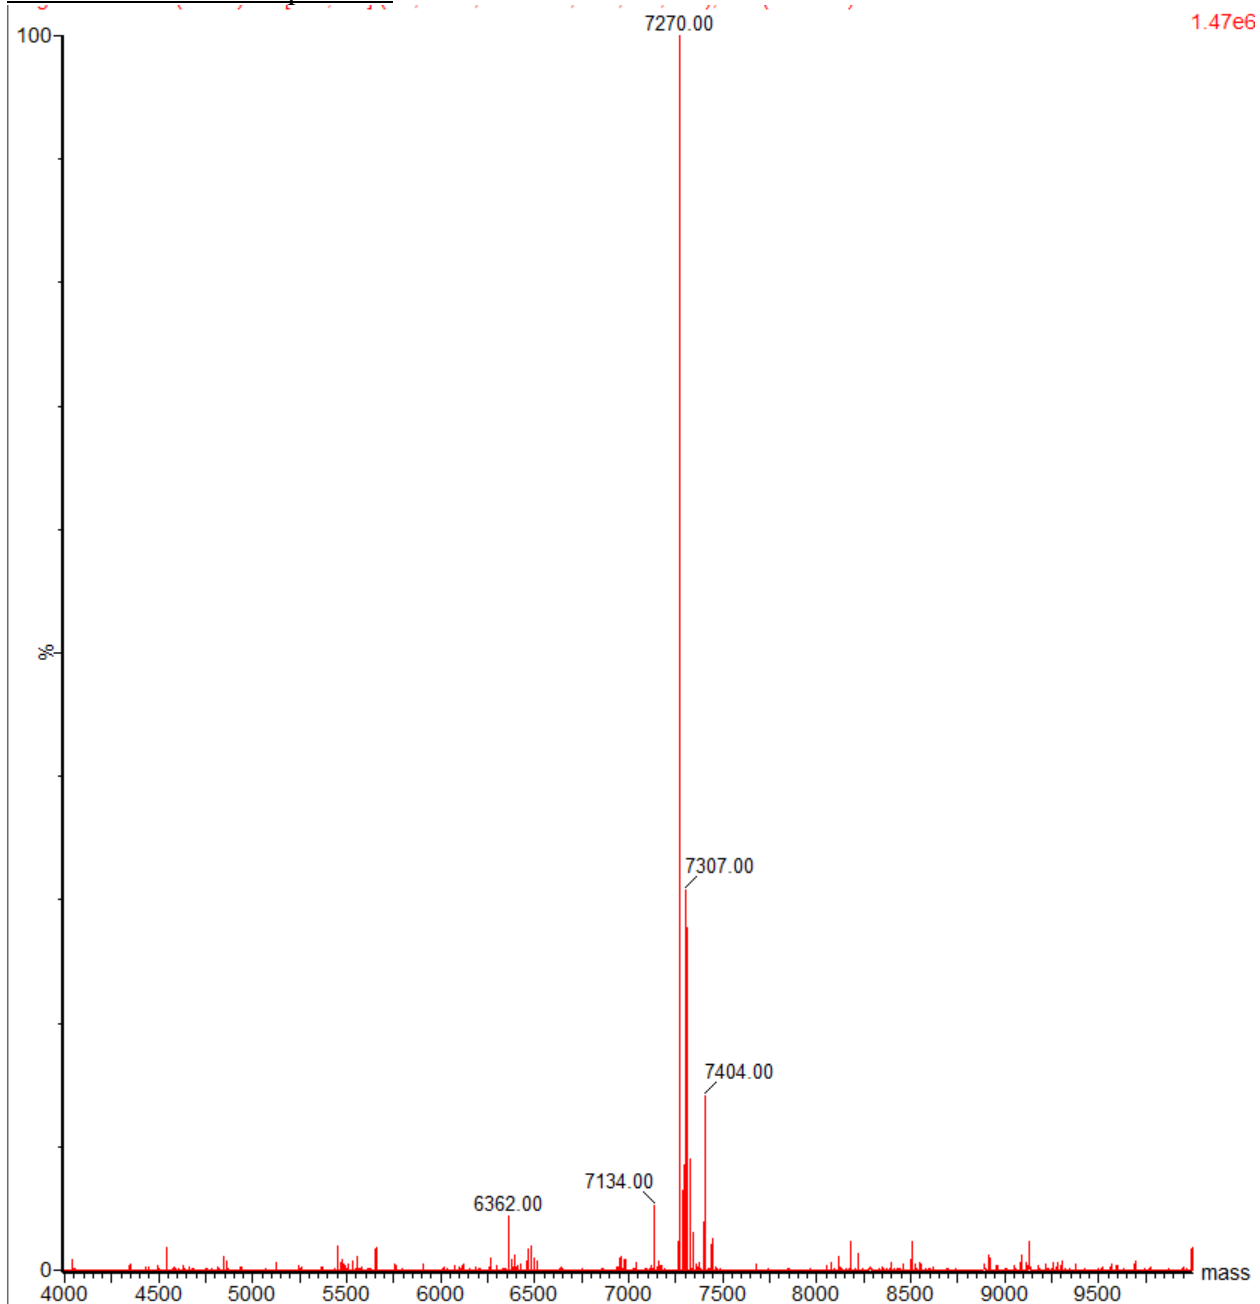

## LCMS Characterization of 38

Produced from **2** by General Procedure **2**:

Using **Ψ-10**

Yield (A260): 68%

Expected Mass: 7269.9

Expected (M-6)/6 Ion: 1210.65

Found Deconvoluted Mass: 7270.0

Found (M-6)/6 Ion: 1210.5

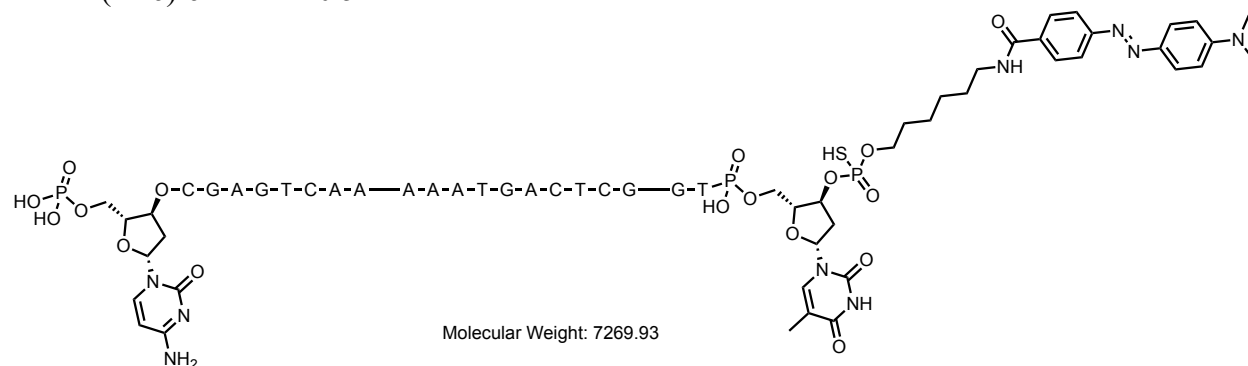

## A260 Chromatogram

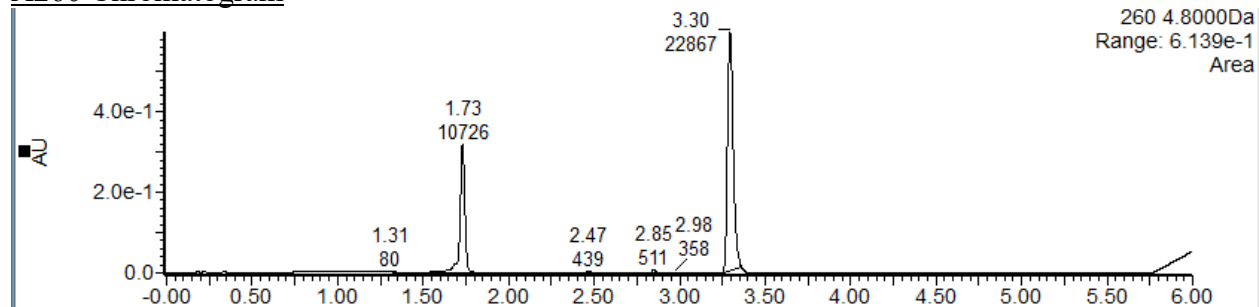

Mass Spectrum (RT= 3.30 min)

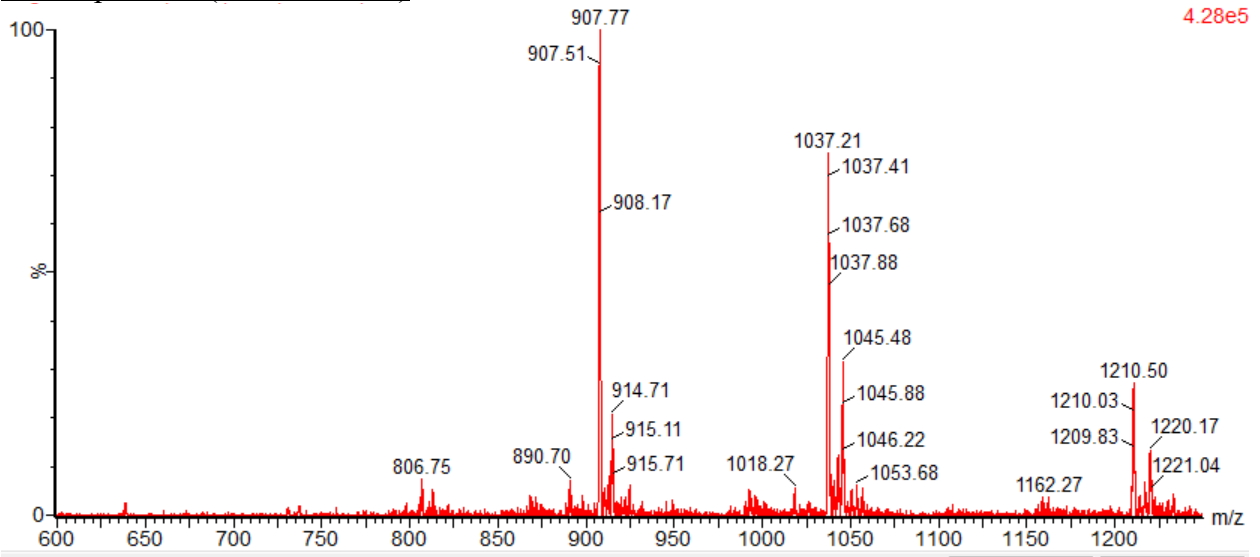

Deconvoluted Mass Spectrum

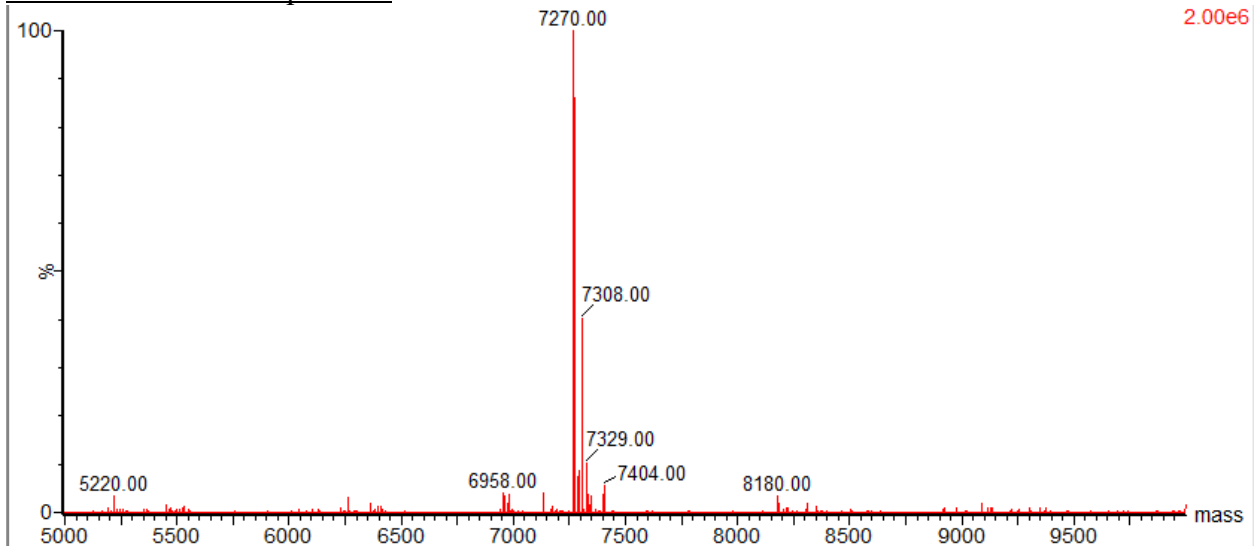

## LCMS Characterization of 39

Produced from **1** by General Procedure **2**:

Using  $\Psi$ -11

Yield (A260): 55%

Expected Mass: 7193.83

Expected (M-6)/6 Ion: 1197.97

Found Deconvoluted Mass: 1197.69

Found (M-6)/6 Ion: 7194 and 7232.00 (potassium adduct)

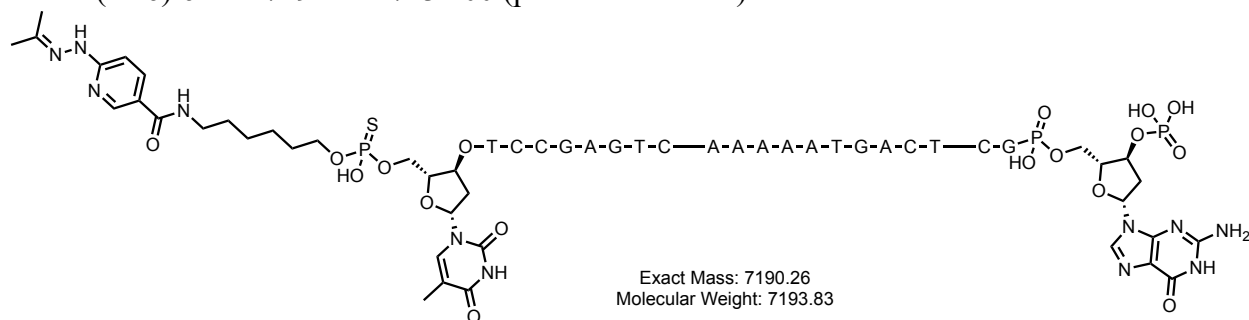

### A260 Chromatogram

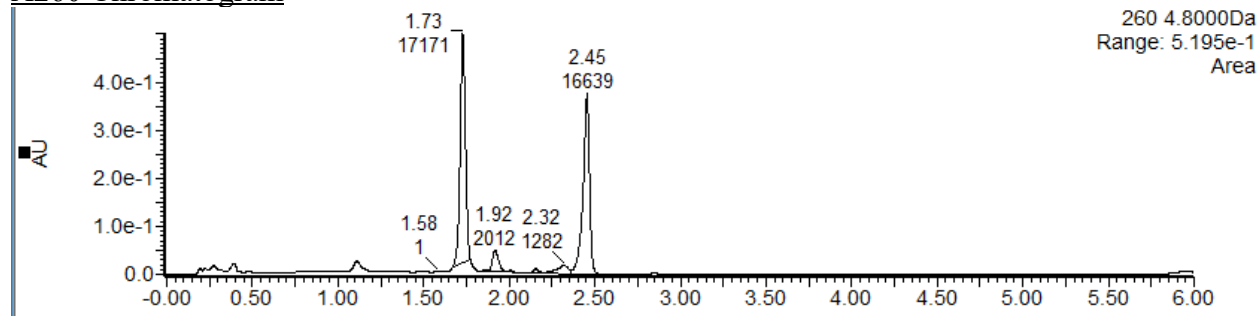

### Mass Spectrum (RT= 2.45 min)

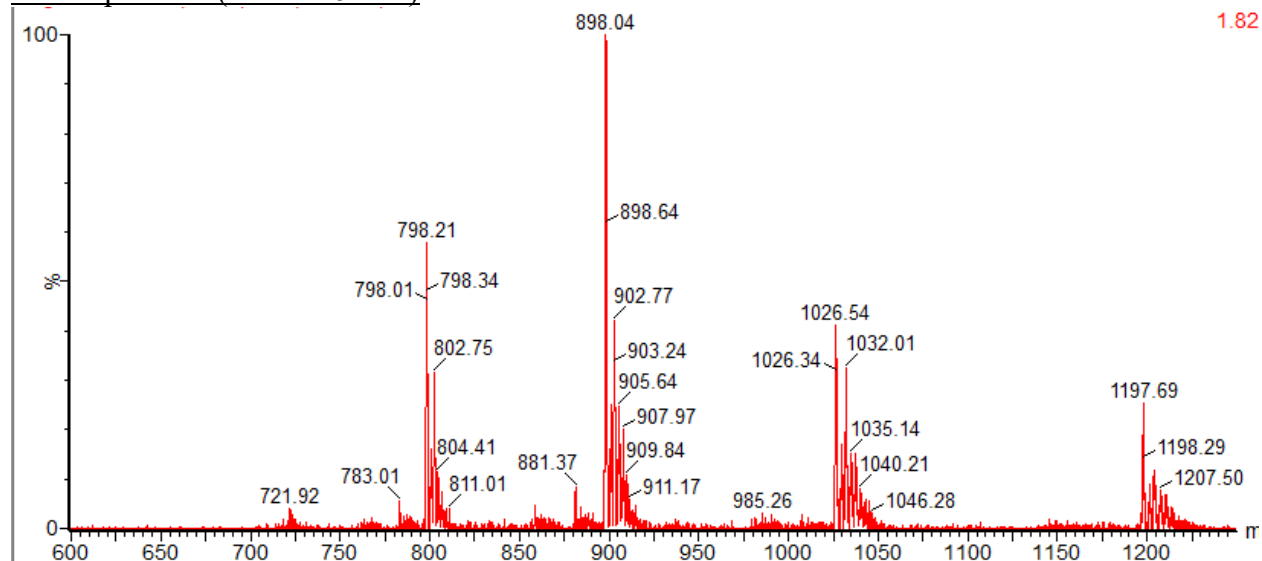

# Deconvoluted Mass Spectrum

9.14e6

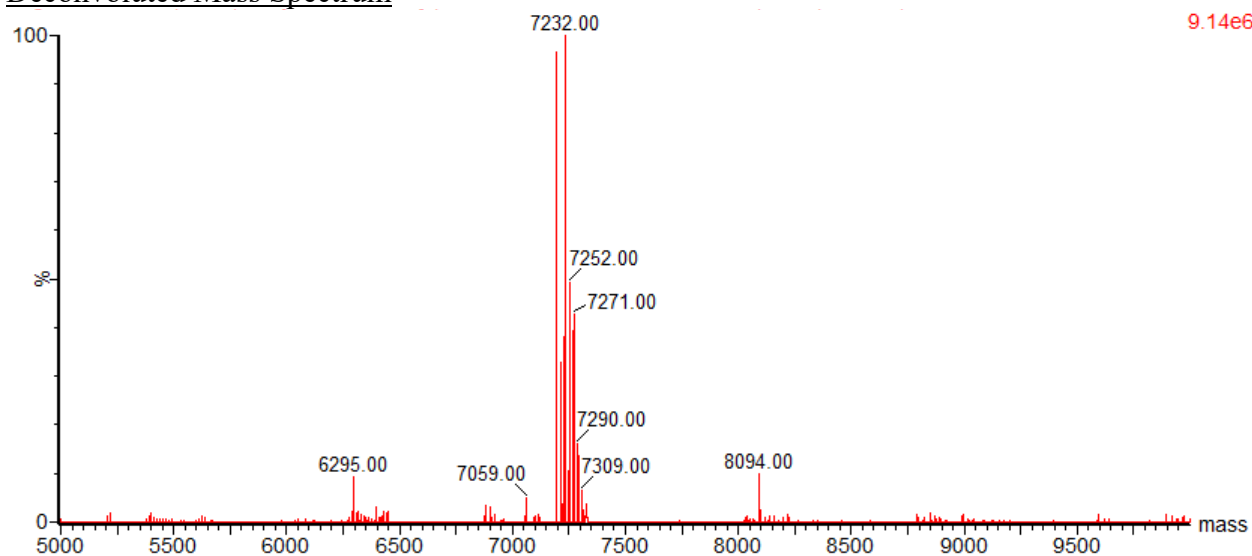

## LCMS Characterization of 40

Produced from **1** by General Procedure **2**:

Using **Ψ-20** produced *in situ*

Yield (A260): 72%

Expected Mass: 7285.92

Expected (M-6)/6 Ion: 1213.32

Found Deconvoluted Mass: 7287.0

Found (M-6)/6 Ion: 1213.23

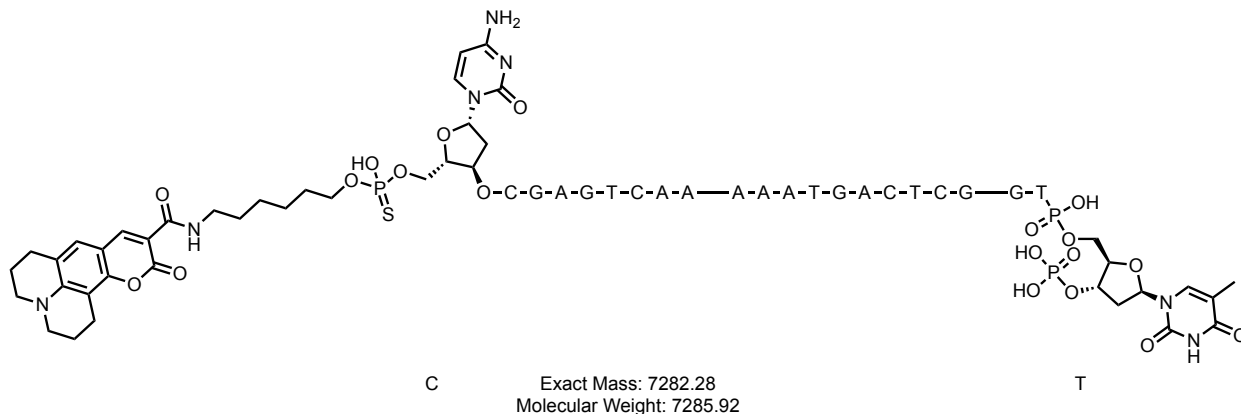

## A260 Chromatogram and TIC

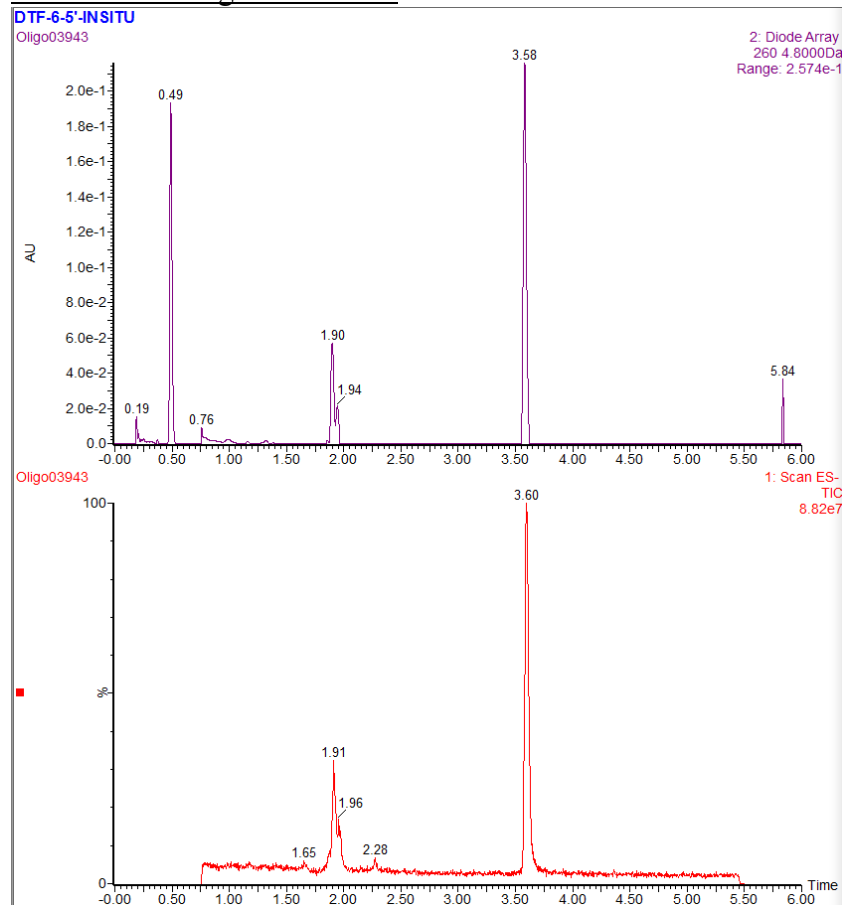



Mass Spectrum (RT= 3.58 min)

DTF-6-5'-INSITU

Oligo03943 854 (3.596) Cm (844:877)

1: Scan ES-  
6.04e5

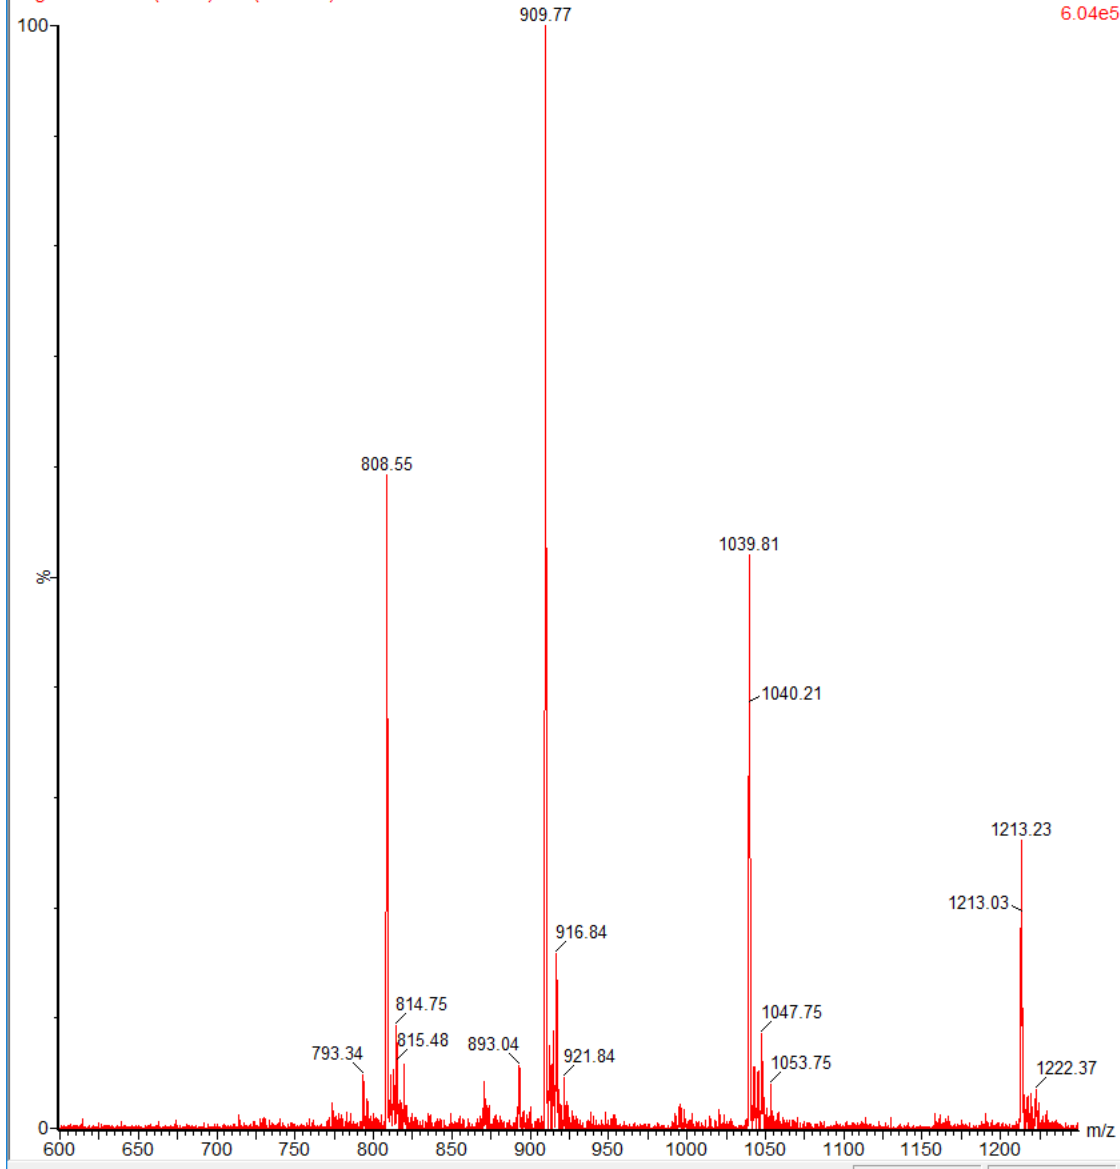

# Deconvoluted Mass Spectrum

DTF-6-5'-INSITU

Oligo03943 854 (3.596) M1 [Ev0,It10] (Gs,1.500,600:1249,1.00,L33,R33); Cm (844:877)

1: Scan ES-  
1.67e6

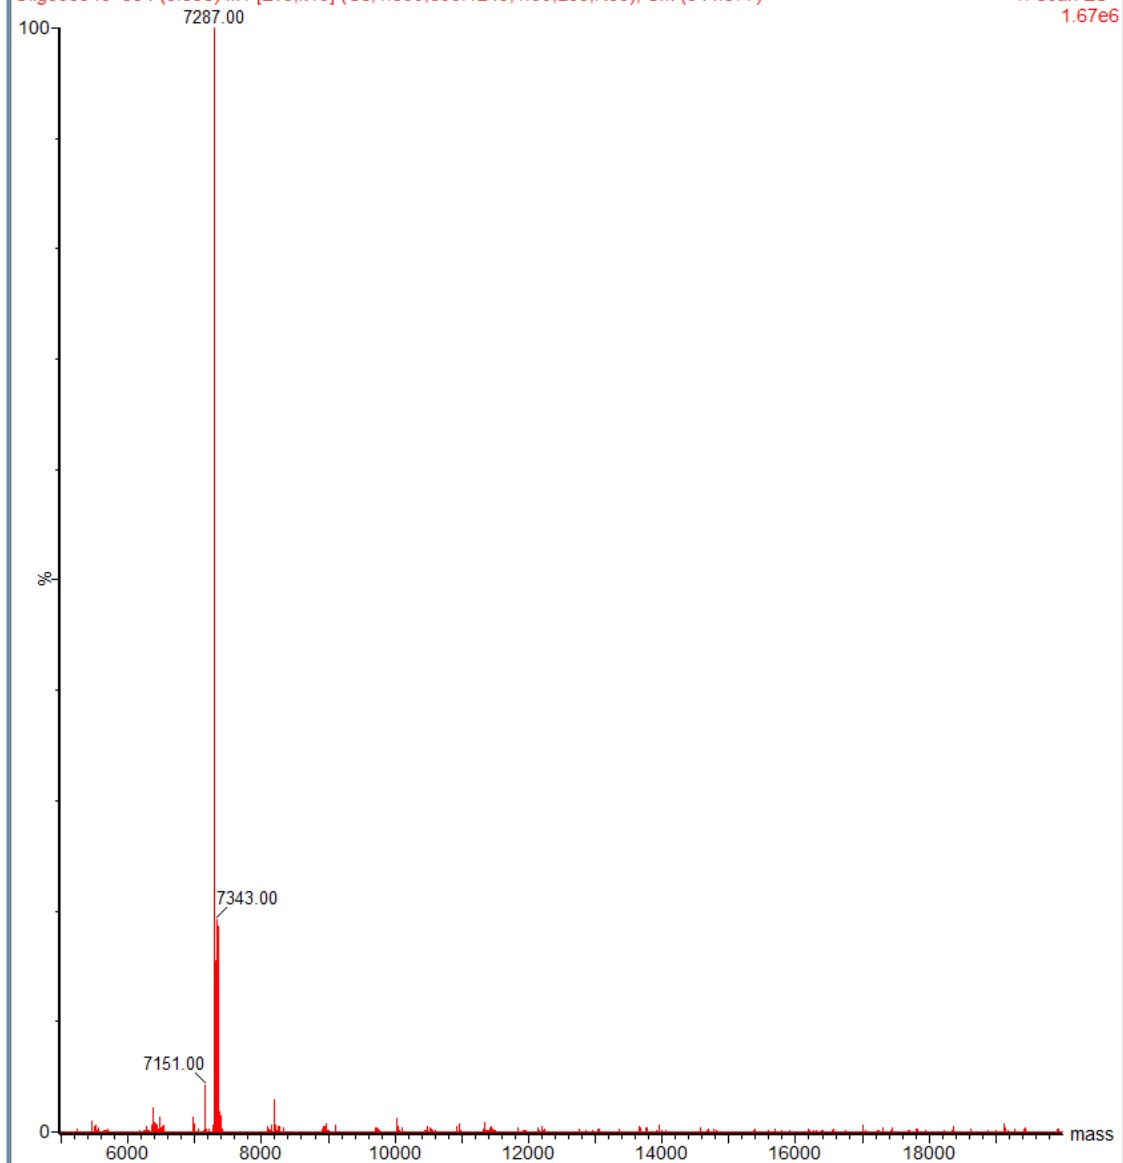

## LCMS Characterization of 41

Produced from **2** by General Procedure **2**:

Using **Ψ-20** produced *in situ*

Yield (A260): 65%

Expected Mass: 7285.92

Expected (M-6)/6 Ion: 1213.32

Found Deconvoluted Mass: 7287.0

Found (M-6)/6 Ion: 1213.41

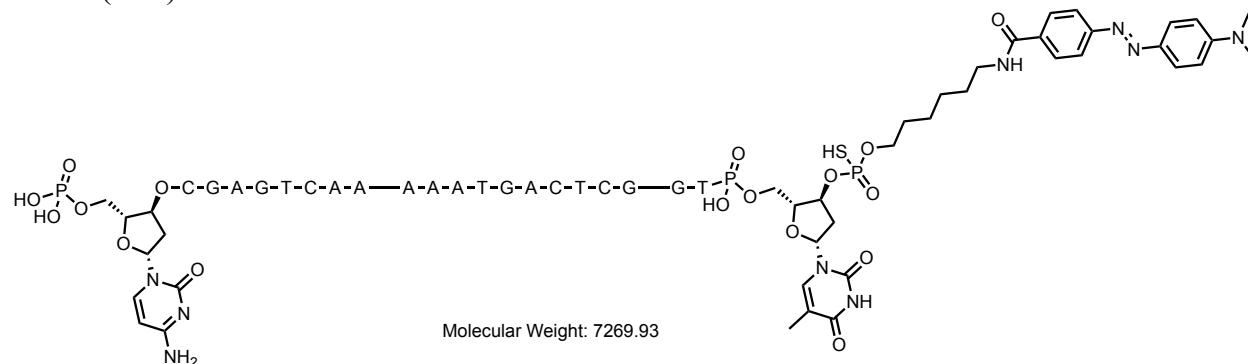

## A260 Chromatogram and TIC

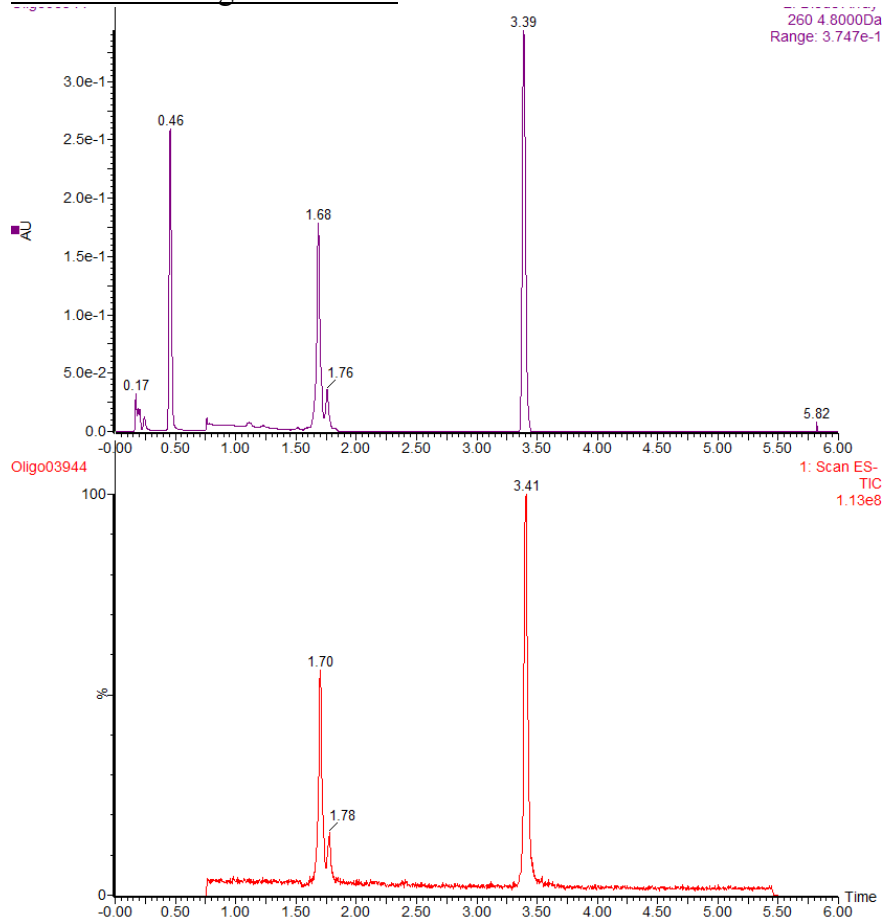

Mass Spectrum (RT= 3.39 min)

DTF-6-3'-INSITU

Oligo03944 798 (3.409) Cm (776:825)

1: Scan ES-  
5.67e5

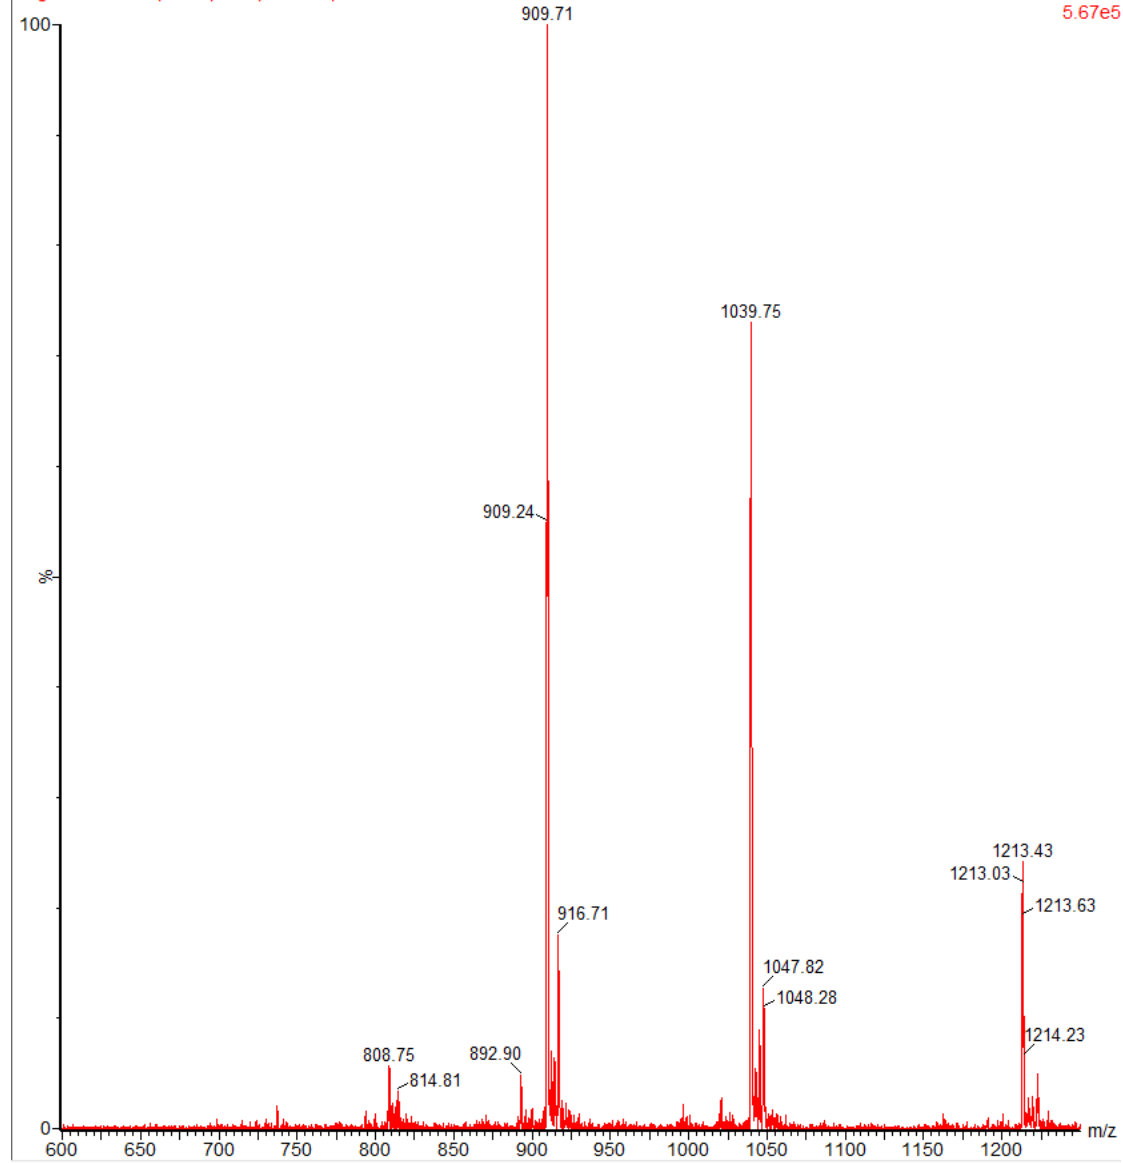

## Deconvoluted Mass Spectrum

DTF-6-3'-INSITU

Oligo03944 798 (3.409) M1 [Ev0,It10] (Gs,1.500,600:1250,1.00,L33,R33); Cm (776:825)

1: Scan ES-  
1.45e6

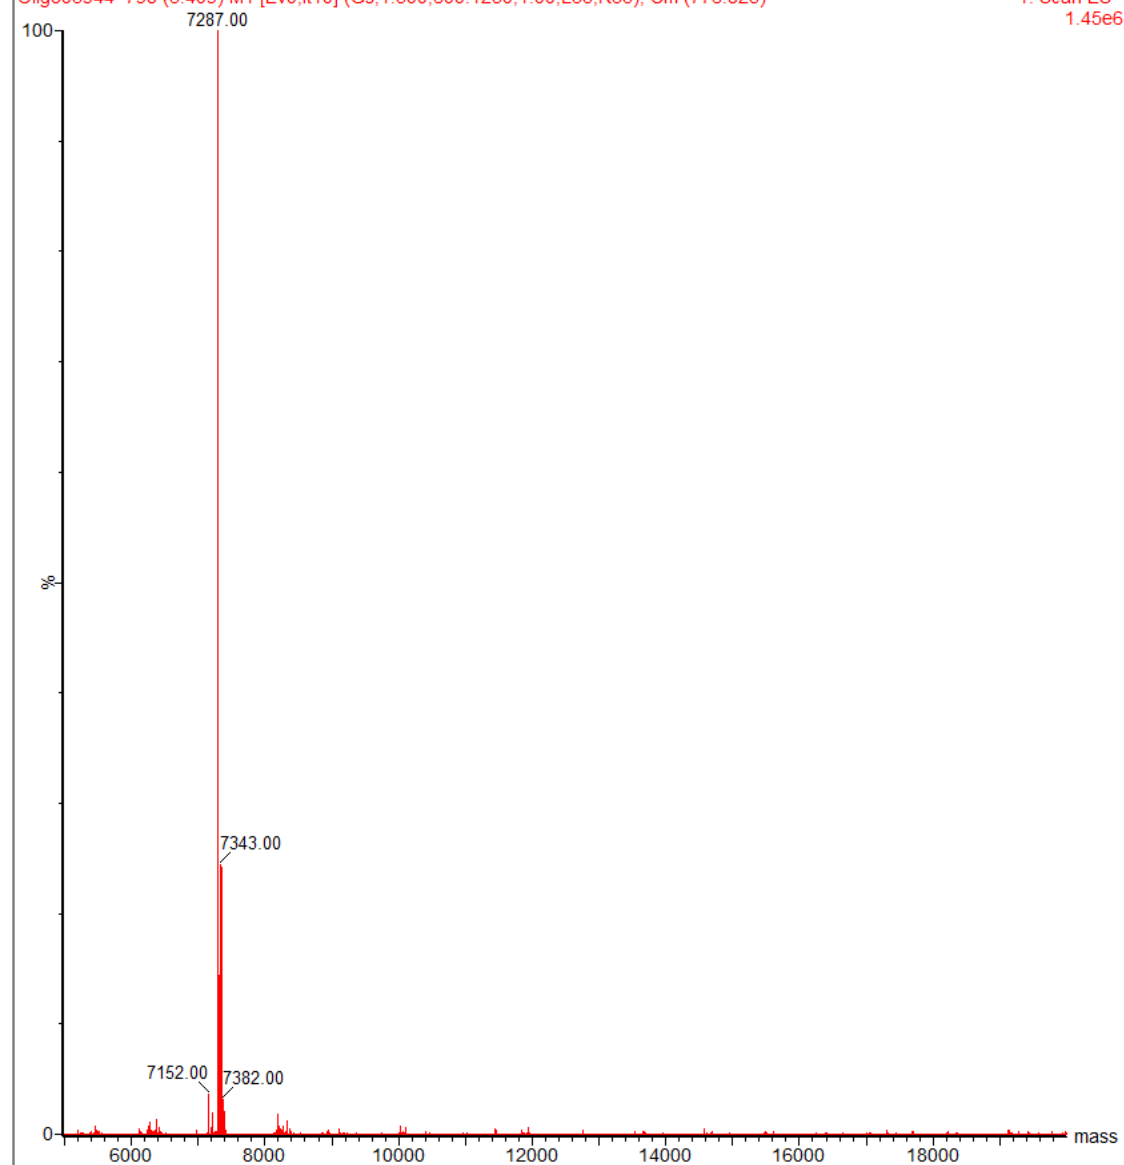

---

---

## Secondary Manipulations:

### Azide Reduction (42):

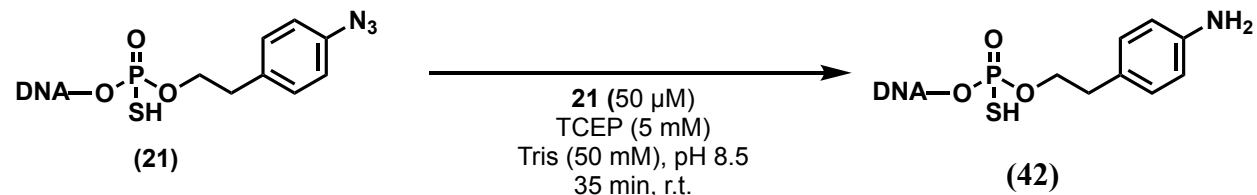

Compound **21** (5 nmol) was synthesized by *General Procedure 2* and isolated crude after ethanol precipitation. Solid **21** was dissolved (100 μL) in tris buffer (50 mM) containing TCEP (5 mM) at pH 8.5. This solution was vortexed and transferred to an HPLC vial. This reaction was injected onto the H-Class HPLC at different timepoints. The reaction was found to be complete after 35 minutes at room temperature. Reduction product **42** was characterized below.

## LCMS Characterization of 42

Produced from **21**

Yield (A260): 78% (total yield including **1**)

Expected Mass: 7038.63

Expected (M-6)/6 Ion: 1171.5

Found Deconvoluted Mass: 7039.0

Found (M-6)/6 Ion: 1171.7

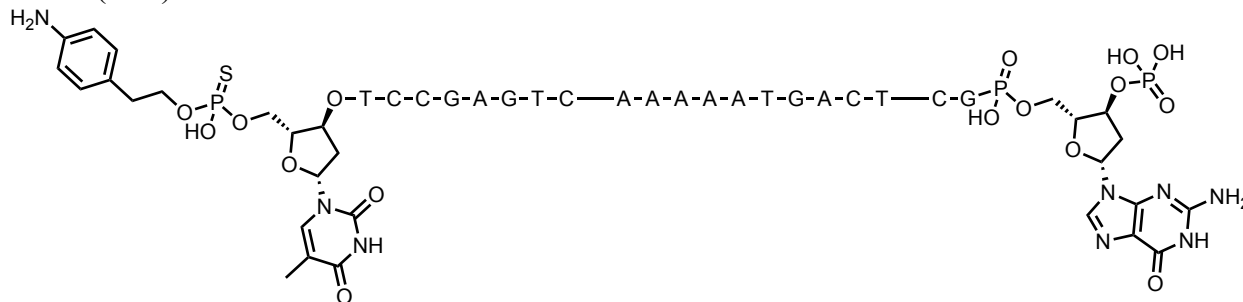

Exact Mass: 7035.16  
Molecular Weight: 7038.63

### A260 Chromatogram

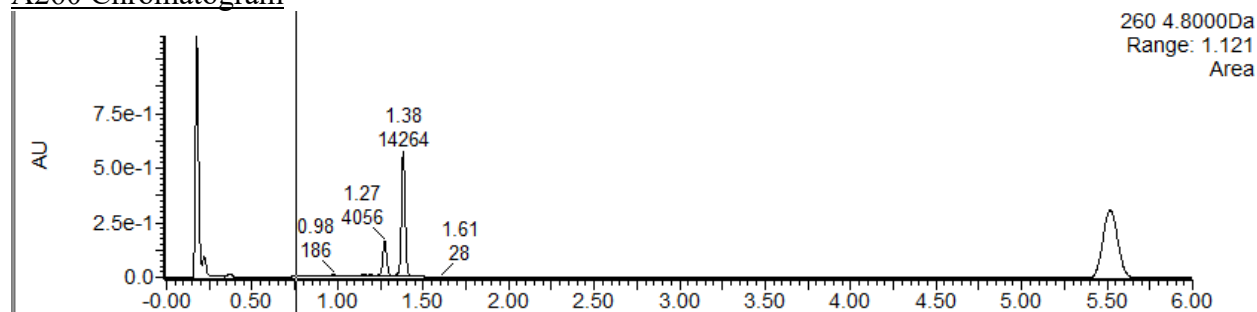

Mass Spectrum (RT= 1.38 min)

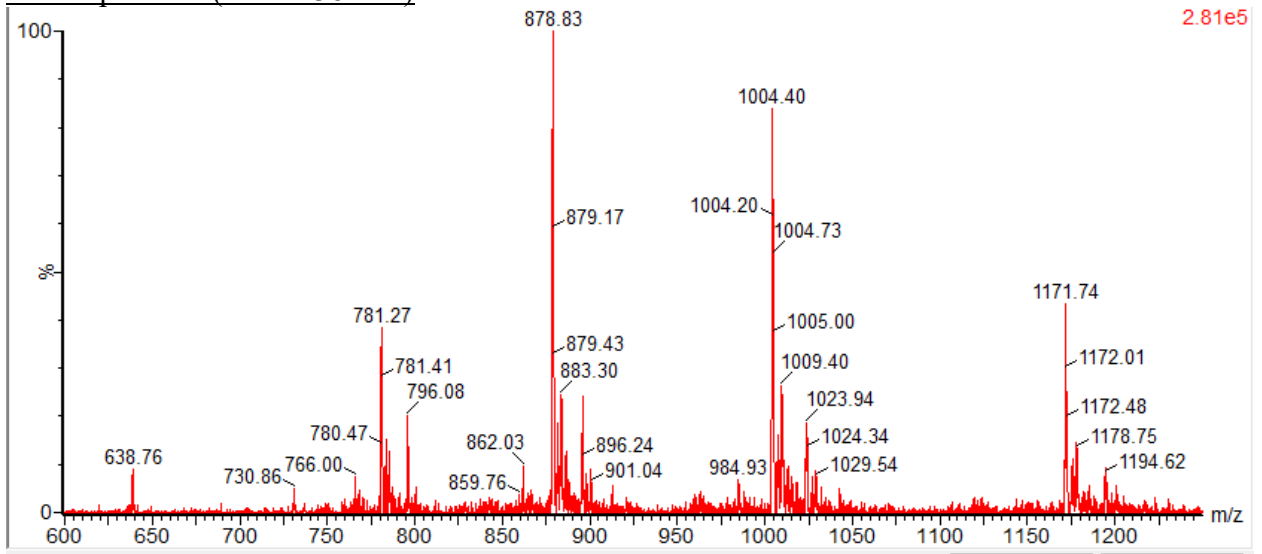

Deconvoluted Mass Spectrum

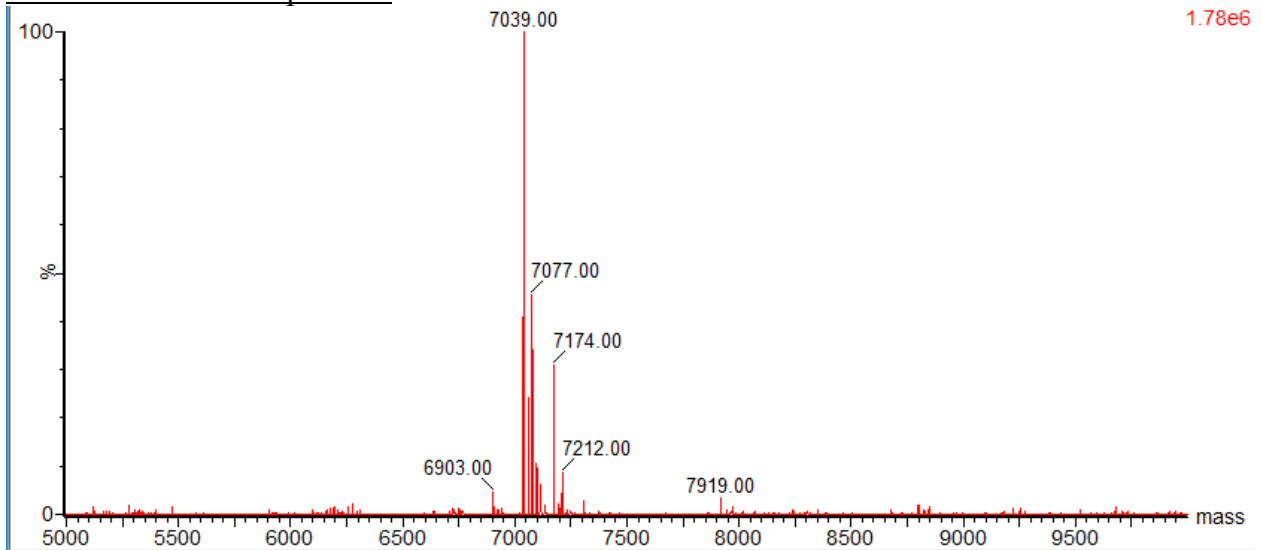



---

---

### 43 SPAAC Reaction:

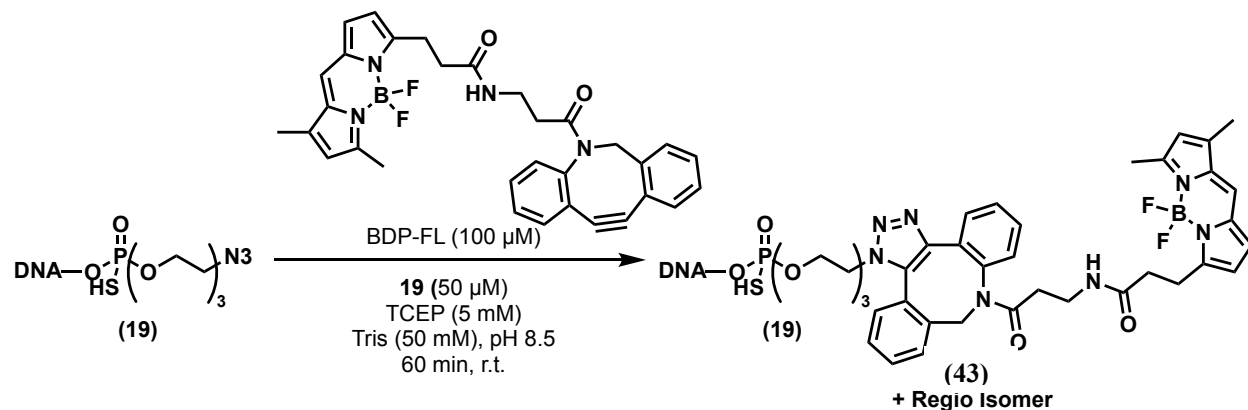

Compound **19** (5 nmol) was synthesized by *General Procedure 2* and isolated crude after ethanol precipitation. Solid **19** was dissolved (98 μL) in tris buffer (50 mM) at pH 8.5. To this solution BDP-FL (2 μL) was added from stock solution (5 mM) in DMA, to a final concentration of 100 μM. This solution was vortexed and transferred to an HPLC vial. This reaction was injected onto the H-Class HPLC after 60 minutes. SPAAC product **43** was characterized below.

## LCMS Characterization of 43

Produced from **19**

Yield (A260): 86%

Expected Mass: 7627.05

Expected (M-8)/8 Ion: 951.925

Found Deconvoluted Mass: 7627.0

Found (M-6)/6 Ion: 952.05

\*The two peaks at 3.91 and 4.14 minutes correspond to the two regioisomers of **43**.

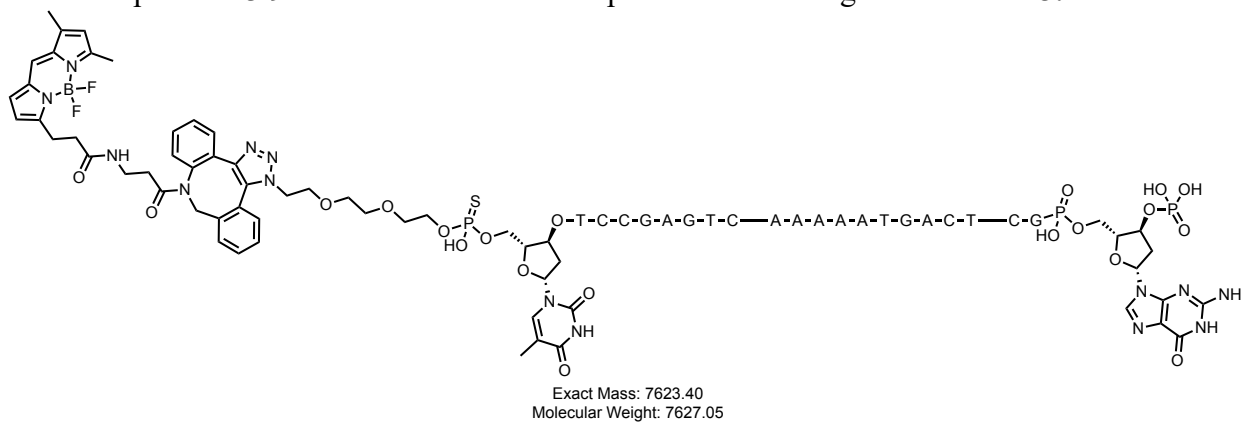

### A260 Chromatogram

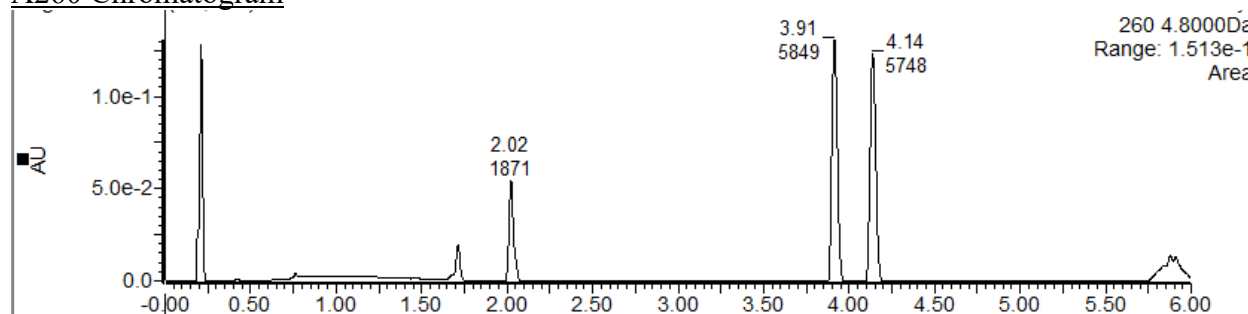

Mass Spectrum (RT= 3.91 min)

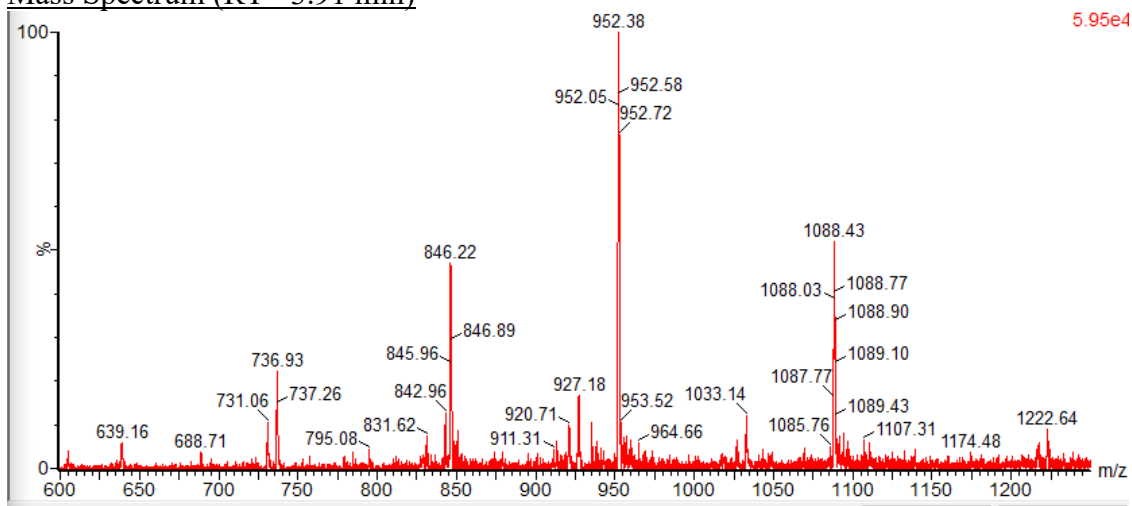

### Deconvoluted Mass Spectrum (RT = 3.91)

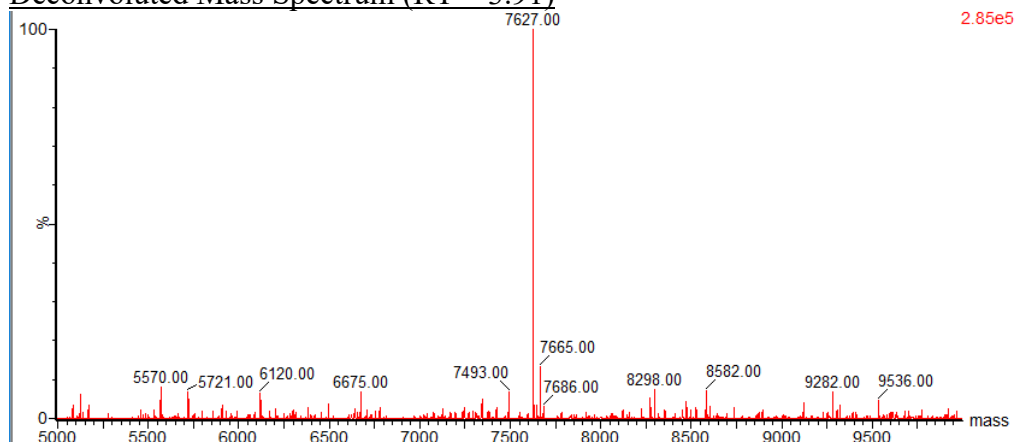

### Deconvoluted Mass Spectrum (RT = 4.14)

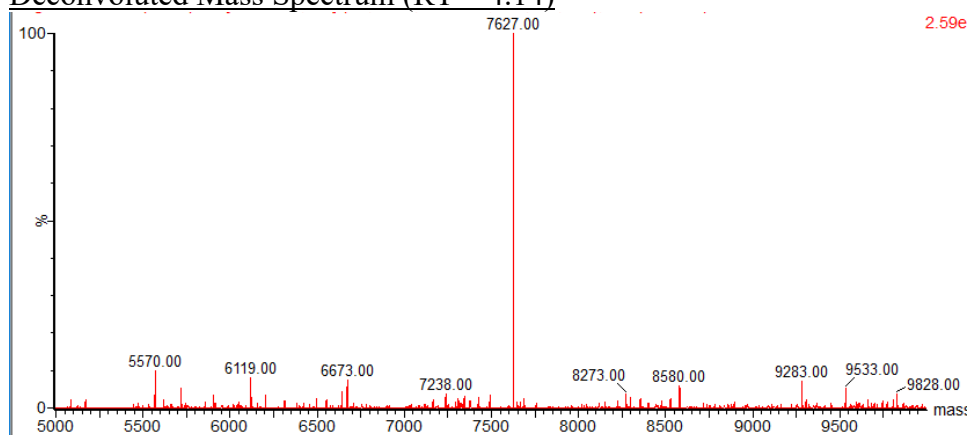

---

#### 44 CuAAC Reaction:

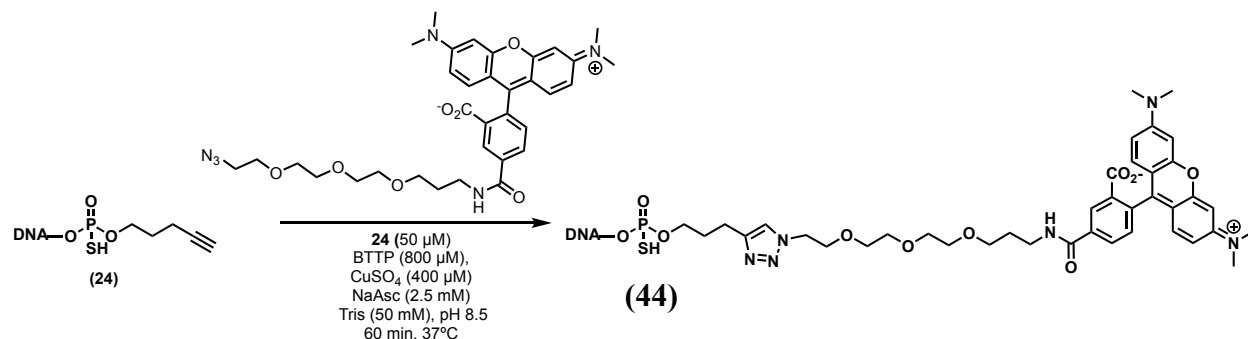

Compound **24** (5 nmol) was synthesized by *General Procedure 2* and isolated crude after ethanol precipitation. Solid **24** was dissolved (92.5  $\mu\text{L}$ ) in tris buffer (50 mM) at pH 8.5. To this solution TAMRA Azide (2  $\mu\text{L}$ ) was added from stock solution (5 mM) in DMA, (final concentration of 100  $\mu\text{M}$ ). Next, BTTP (2  $\mu\text{L}$ ) was added from a stock solution (40 mM in water). Next,  $\text{CuSO}_4$  (1  $\mu\text{L}$ ) was added from a stock solution (40  $\mu\text{M}$  in water) (a final concentration of 400  $\mu\text{M}$ ). The solution was capped and vortexed. Finally, sodium ascorbate (2.5  $\mu\text{L}$ ) was added from a stock solution (100 mM in water). This reaction solution was vortexed and incubated for 1 hour at 37  $^\circ\text{C}$ . This reaction was injected onto the H-Class HPLC after 60 minutes. CuAAC product **44** was characterized below.

## LCMS Characterization of 44

Produced from **24**

Yield (A260): >90%

Expected Mass: 7630.3

Expected (M-8)/8 Ion: 952.75

Found Deconvoluted Mass: 7631.00

Found (M-8)/8 Ion: 952.92

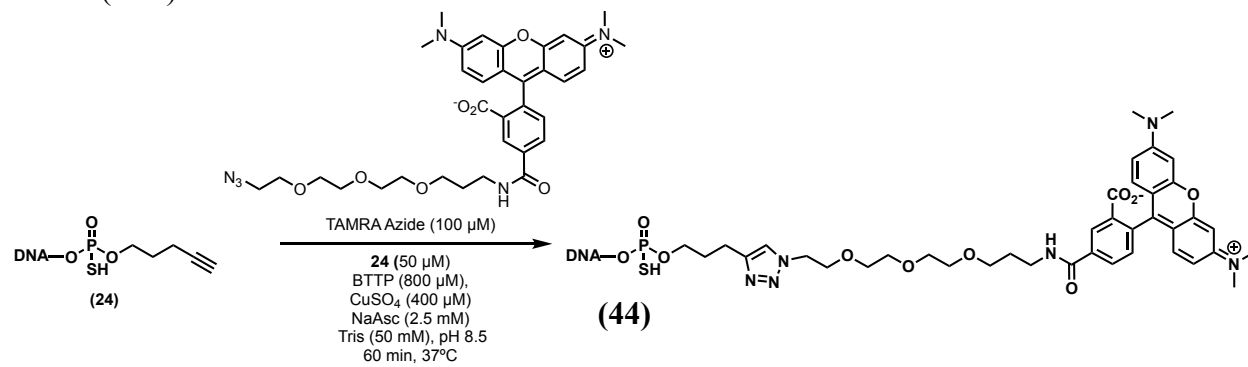

## A260 Chromatogram

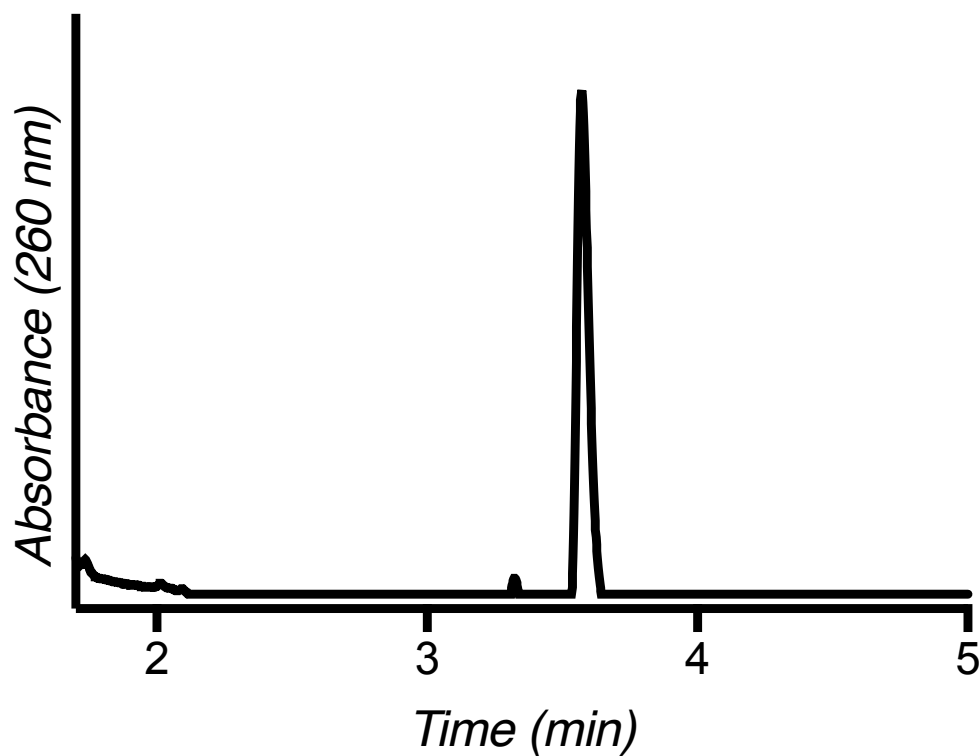

Mass Spectrum (RT= 3.38 min)

2.29e6

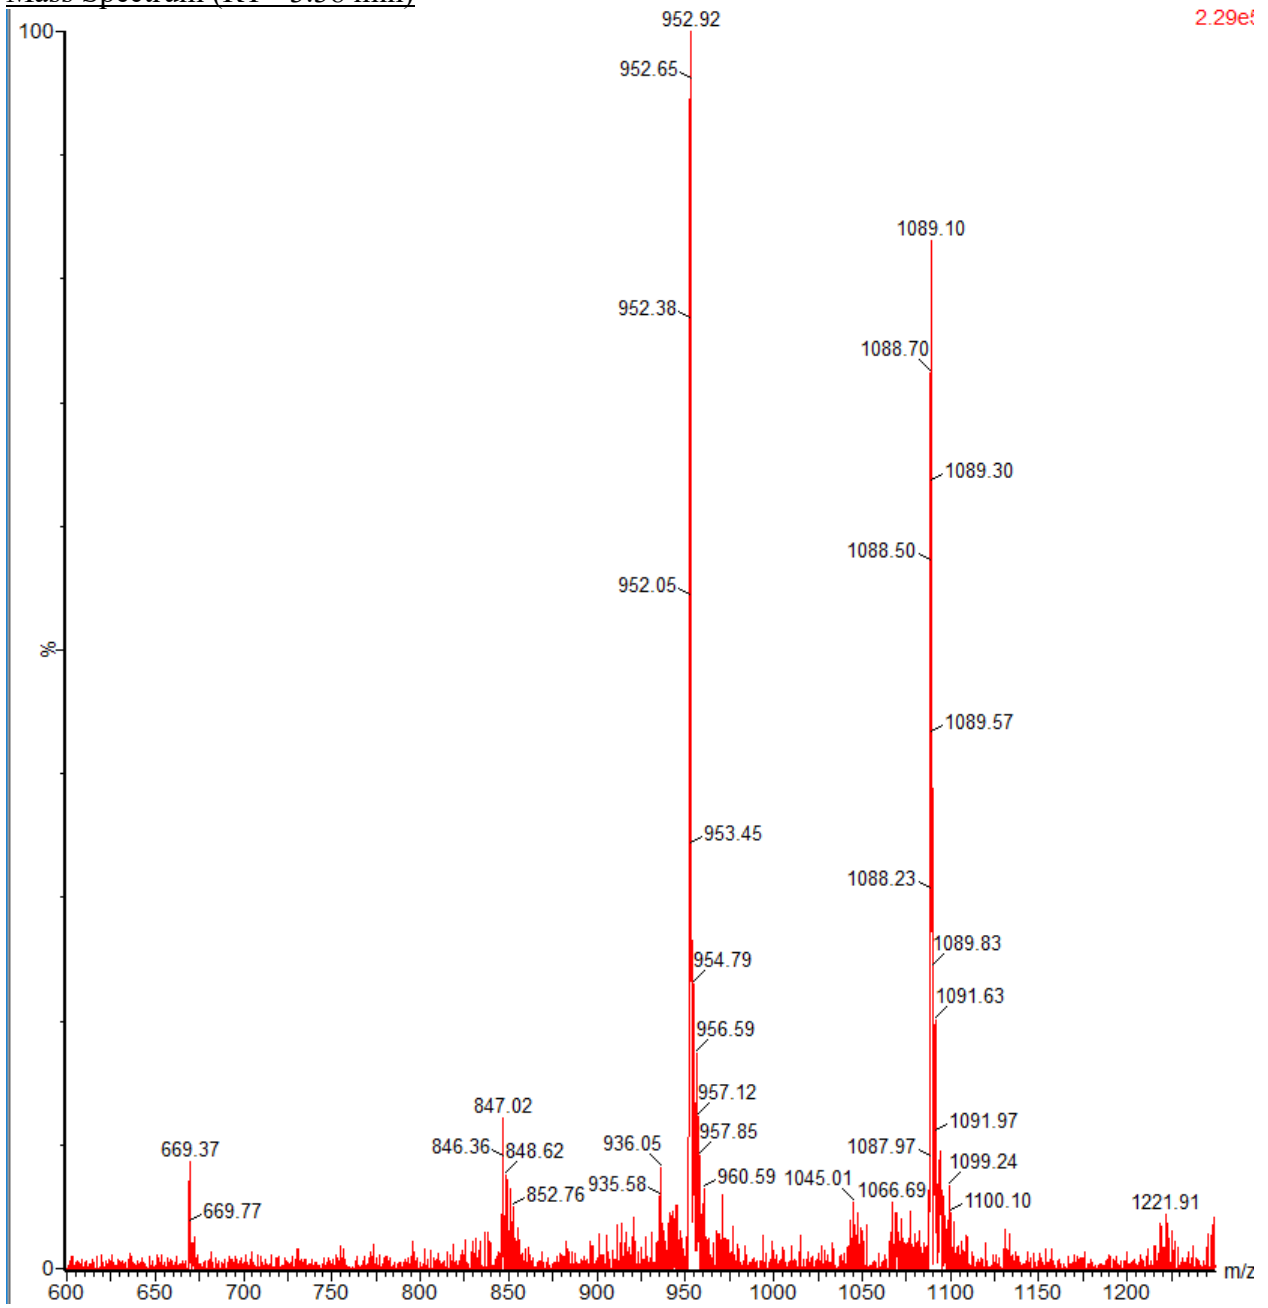

# Deconvoluted Mass Spectrum

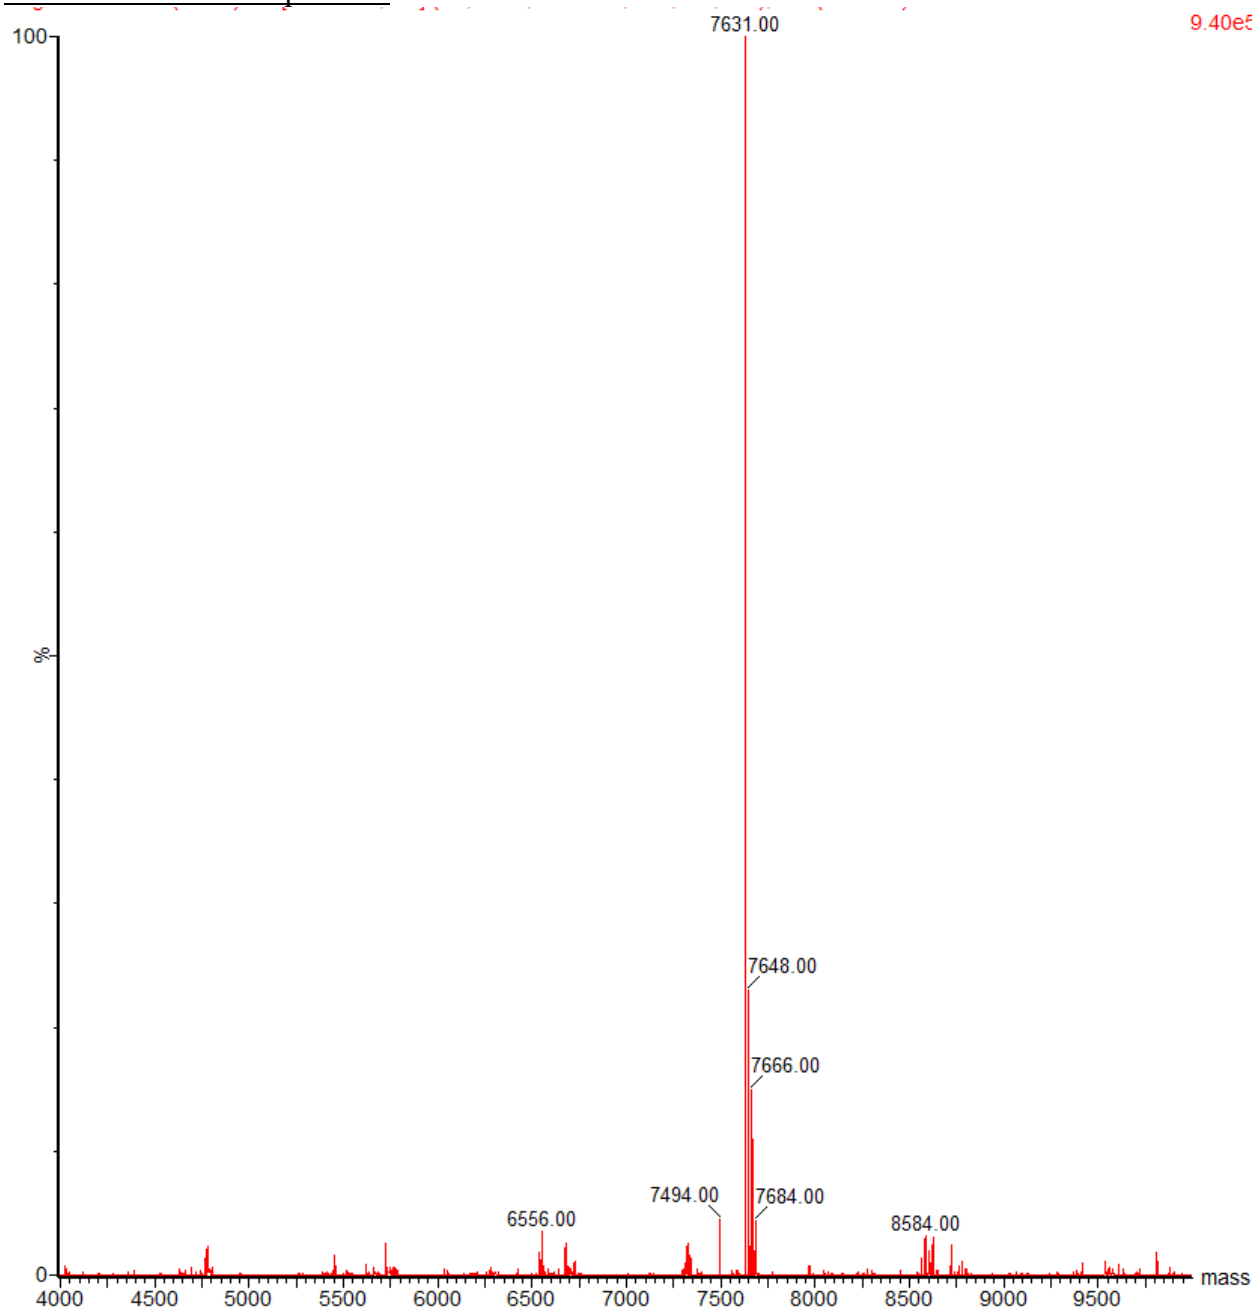



---

#### 45 CuAAC Reaction:

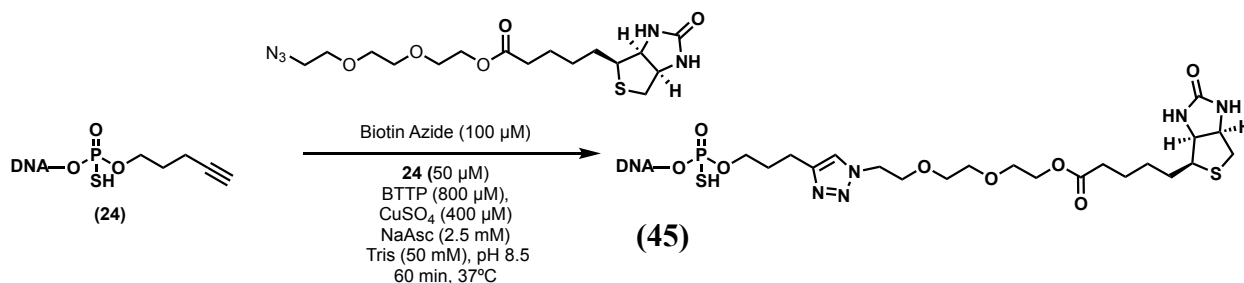

Compound **24** (5 nmol) was synthesized by *General Procedure 2* and isolated crude after ethanol precipitation. Solid **24** was dissolved (92.5 μL) in tris buffer (50 mM) at pH 8.5. To this solution Biotin Azide (2 μL) was added from stock solution (5 mM) in DMA, (final concentration of 100 μM). Next, BTTP (2 μL) was added from a stock solution (40 mM in water). Next, CuSO<sub>4</sub> (1 μL) was added from a stock solution (40 μM in water) (a final concentration of 400 μM). The solution was capped and vortexed. Finally, sodium ascorbate (2.5 uL) was added from a stock solution (100 mM in water). This reaction solution was vortexed and incubated for 1 hour at 37 °C. This reaction was injected onto the H-Class HPLC after 60 minutes. CuAAC product **43** was characterized below.

---

## LCMS Characterization of 45

Produced from **24**

Yield (A260): 90%

Expected Mass: 7387.04

Expected (M-8)/8 Ion: 921.9

Found Deconvoluted Mass: 7387

Found (M-6)/6 Ion: 922.4

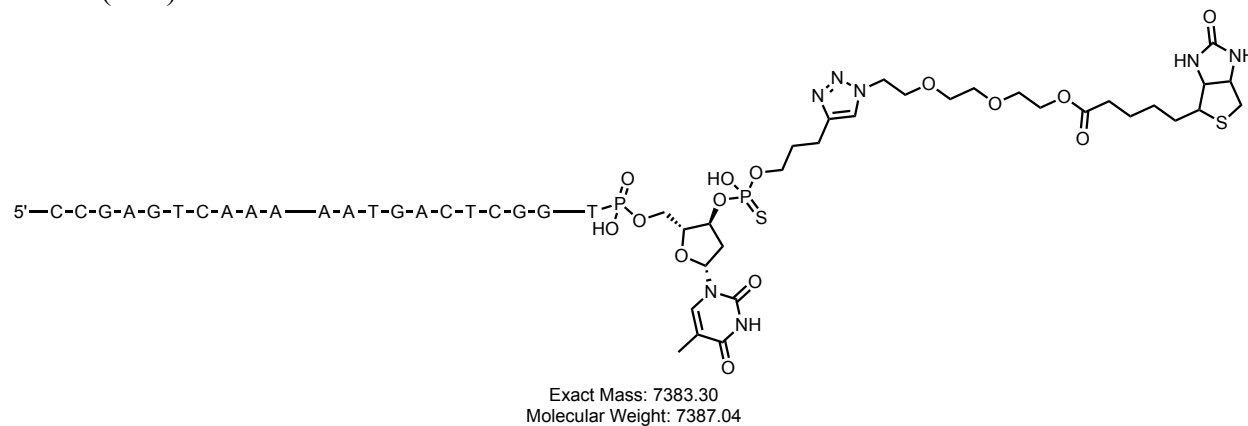

## A260 Chromatogram

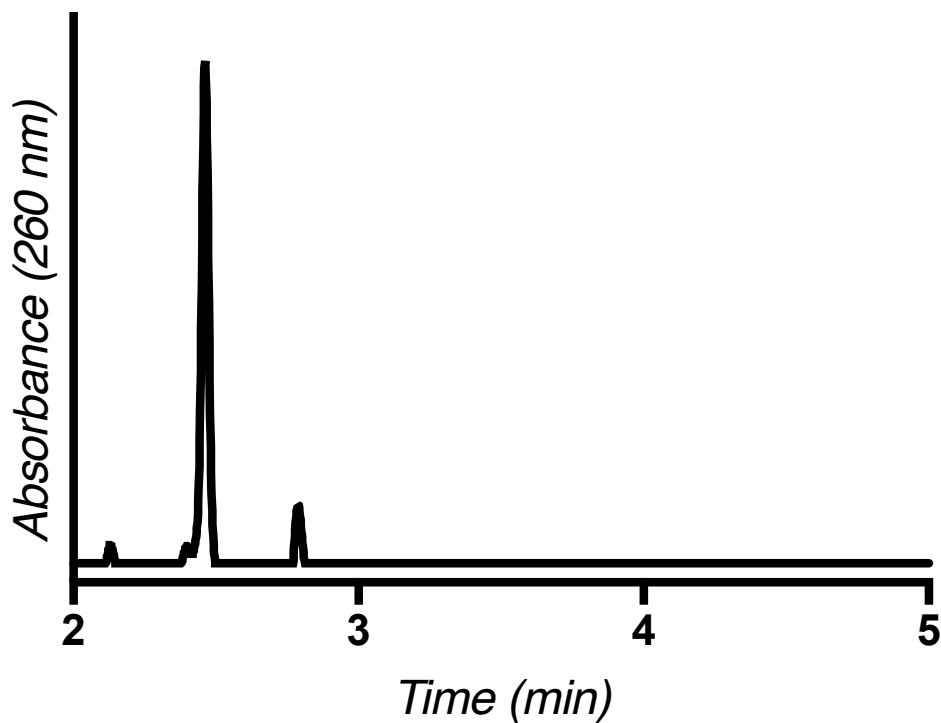

Mass Spectrum (RT= 2.5 min)

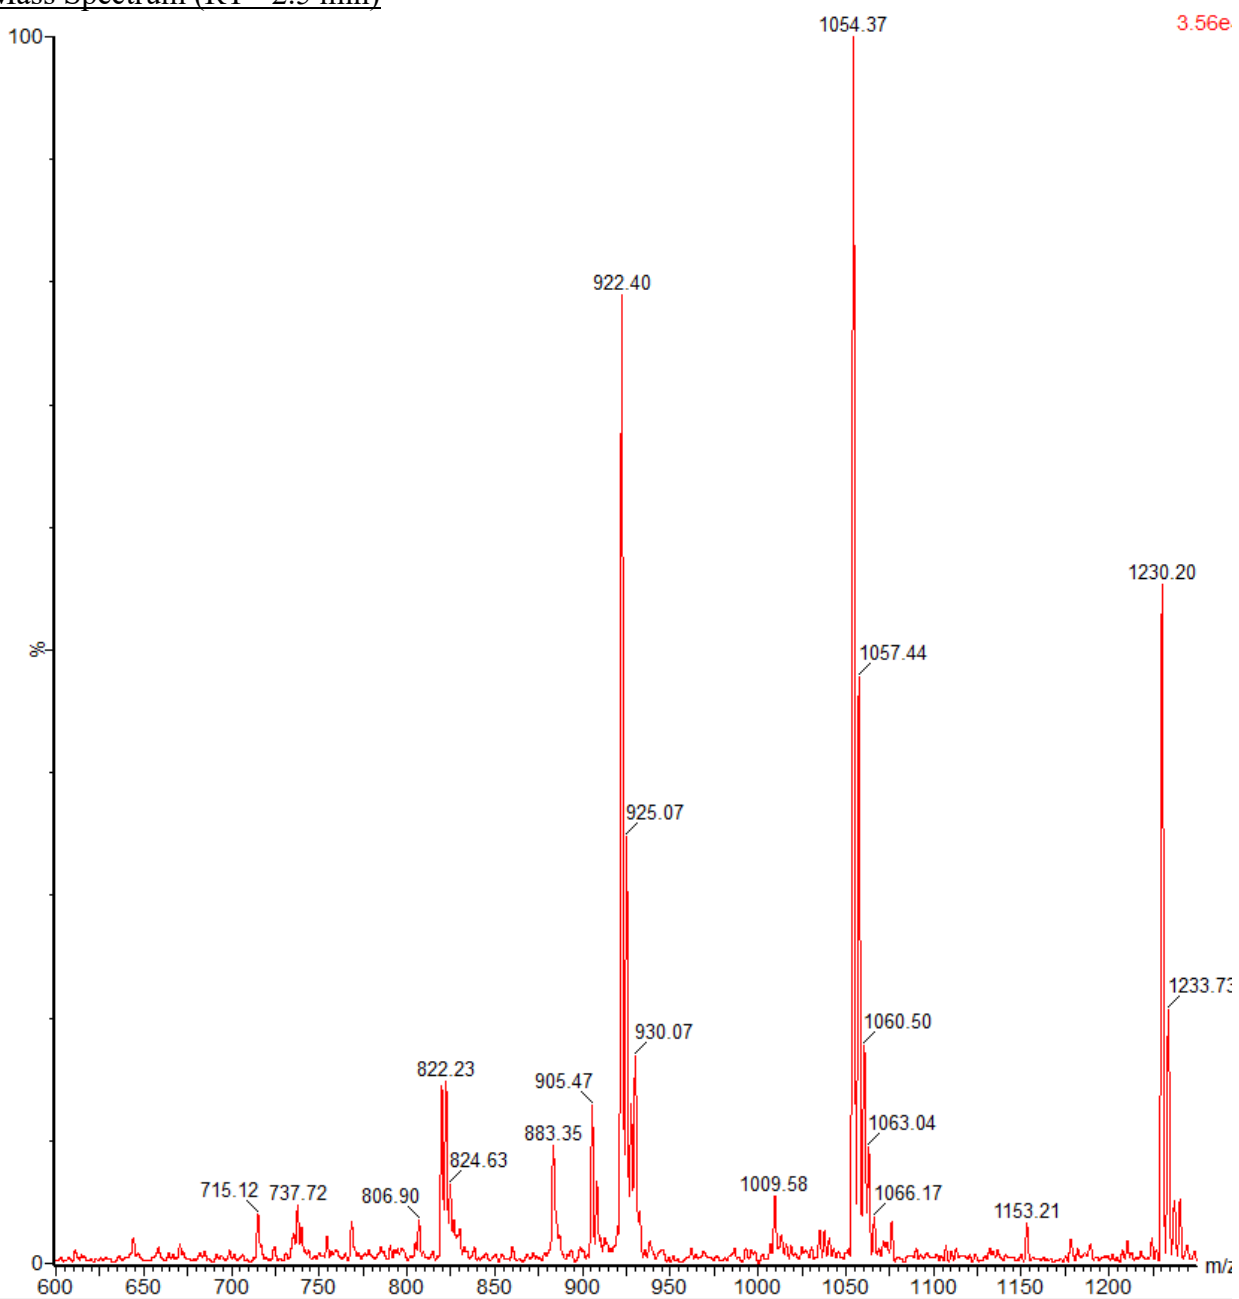

# Deconvoluted Mass Spectrum

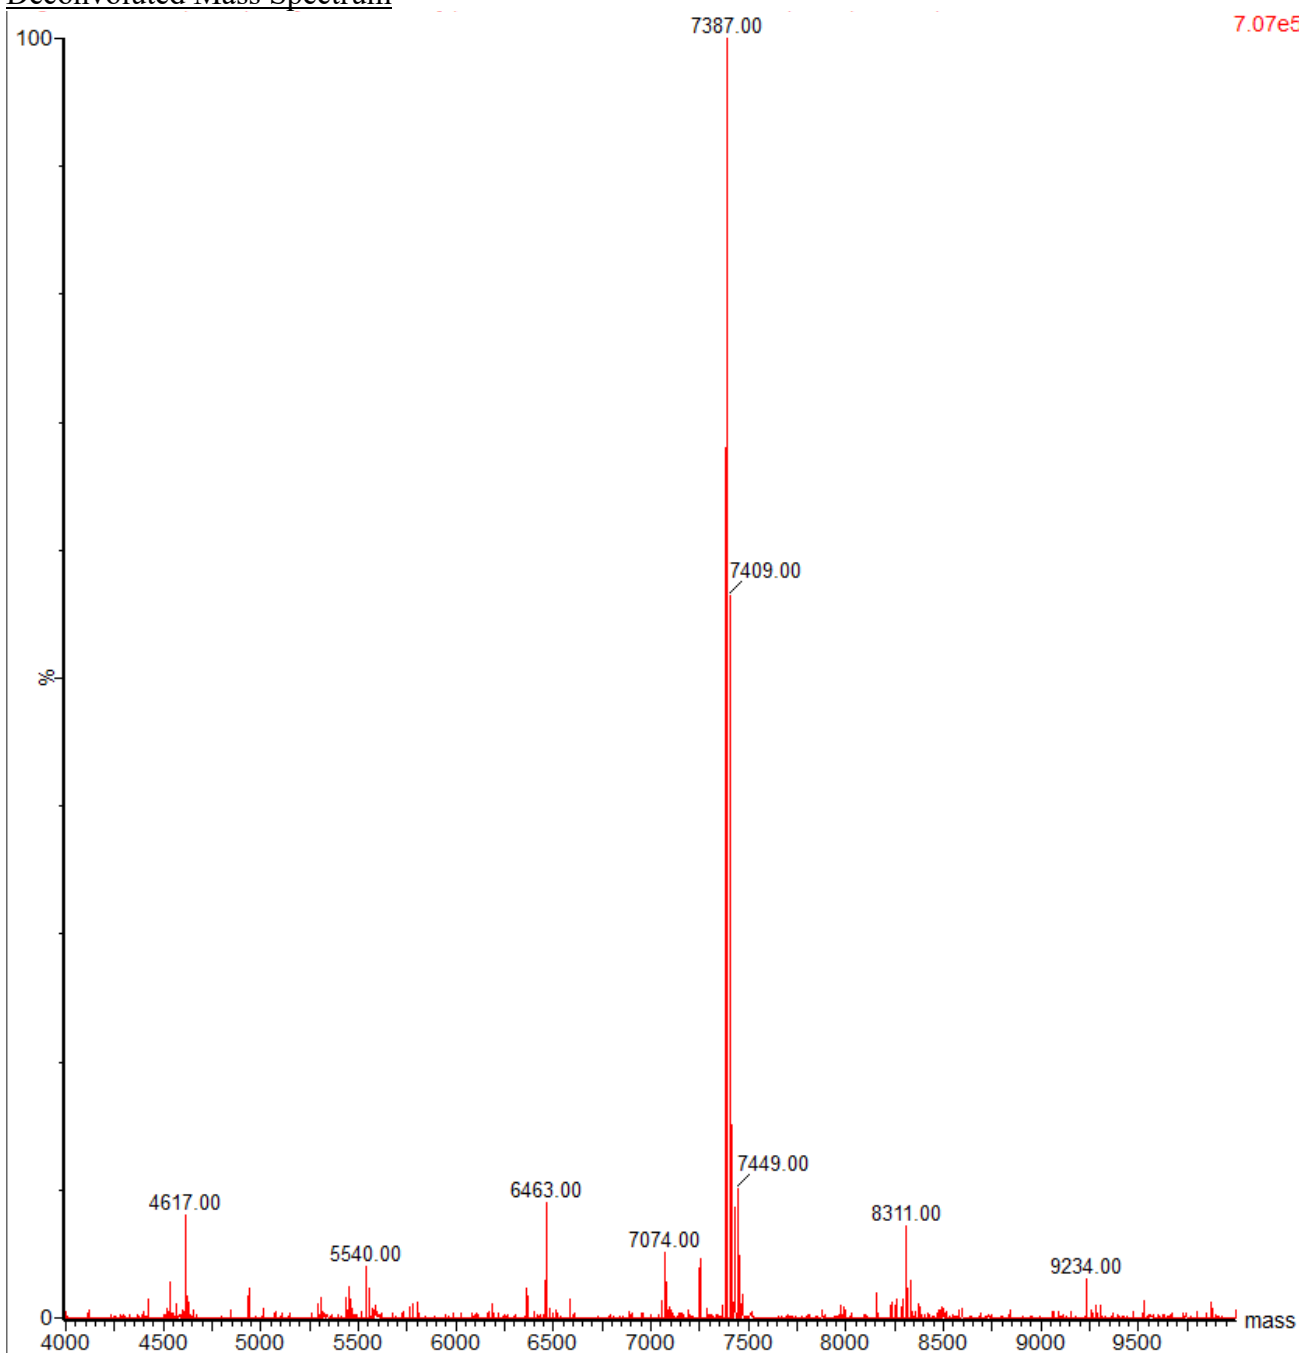

---

## Phosphorothioate (PS) compatibility:

### Protocol for SENDR on PS DNA:

SENDER phosphorothioate (PS) compatibility was analyzed by performing reactions in microcentrifuge tube as described in *General Procedure 2*. Briefly, 5 nmol of PS DNA **46** was loaded onto 100  $\mu\text{L}$  of equilibrated resin. This loaded resin was washed with DMA (500  $\mu\text{L}$  twice) and dry THF (500  $\mu\text{L}$  three times) and dried under vacuum.

To the loaded and dried resin, PSI-module in MeCN (150 mM, 250  $\mu\text{L}$ ) was added. Then DBU (450 mM, 18  $\mu\text{L}$ ) was added to the reaction mixture. The reaction tube was vortexed for 30 seconds and incubated at 37°C for 60 minutes. The reactions were worked up by aspirating and discarding the reaction solution, and washing the resin bed with MeCN (500  $\mu\text{L}$ ) and 1:1 MeCN:PBS (500  $\mu\text{L}$ ). Elute buffer (300  $\mu\text{L}$ ) was added to the resin bed and the tube was agitated by orbital shaker for 5-10 minutes. The DNA containing elution buffer was collected by carefully pipetting the supernatant. DNA was isolate *via* ethanol precipitation. Ethanol precipitation was performed by adding 10% v/v of a NaCl solution (30  $\mu\text{L}$ , 5M) to the elute buffer and three volumes of cold ethanol (-20 °C) were added to the tube (~1000 $\mu\text{L}$ ) and incubated for 18 hours at -20 °C. The tube was then centrifuged at 13,000 rpm for 15 minutes to pellet the DNA, and the extra ethanol was decanted off. The tubes were dried *via* speed vacuum, the DNA was dissolved, and HPLC-MS analysis was performed.

## LCMS Characterization of 47

Produced from 46 by General Procedure 2:

Using  $\Psi$ -1

Yield (A260): 70%

Expected Mass: 6962.52

Expected (M-6)/6 Ion: 1159.6

Found Deconvoluted Mass: 6963.0

Found (M-6)/6 Ion: 1159.4

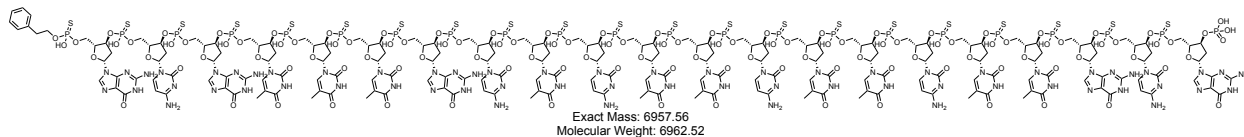

## A260 Chromatogram

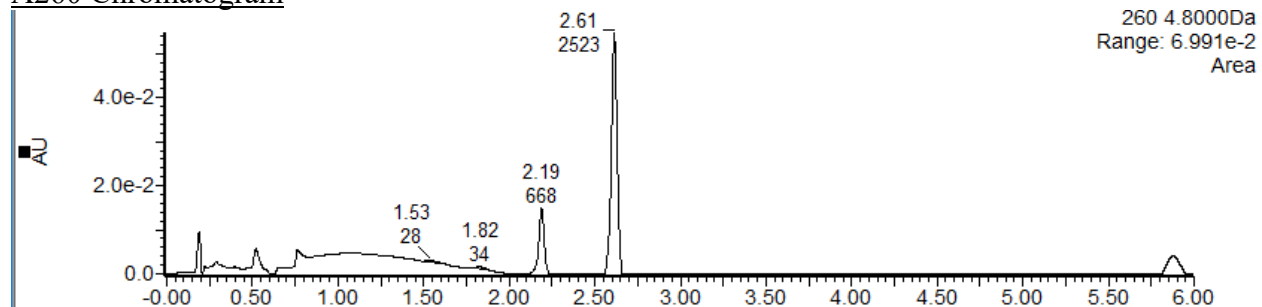

Mass Spectrum (RT= 2.61 min)

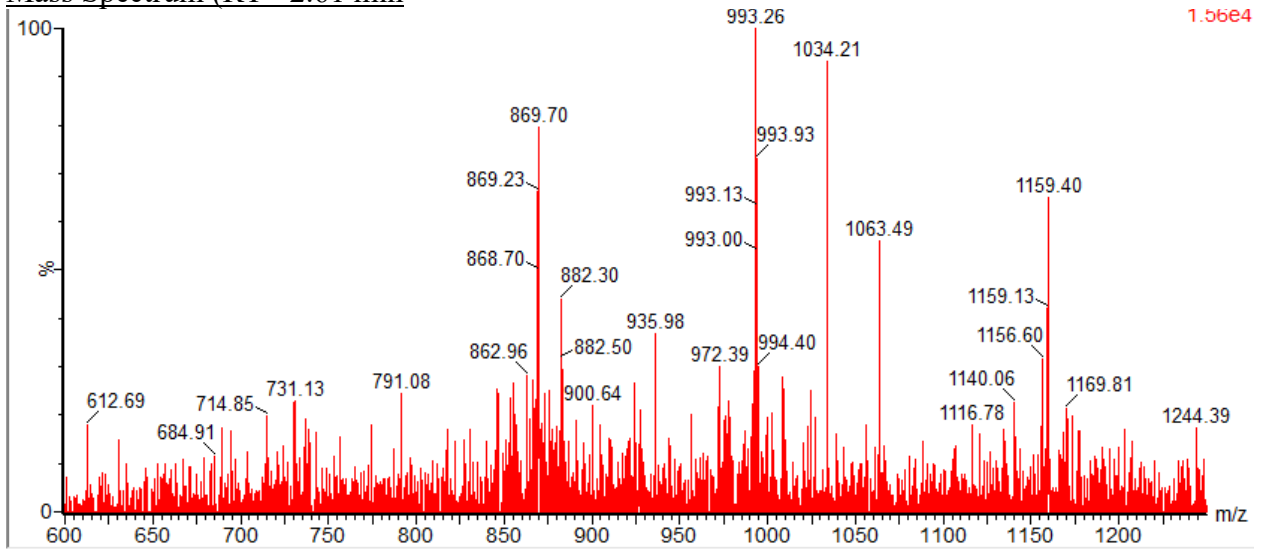

Deconvoluted Mass Spectrum

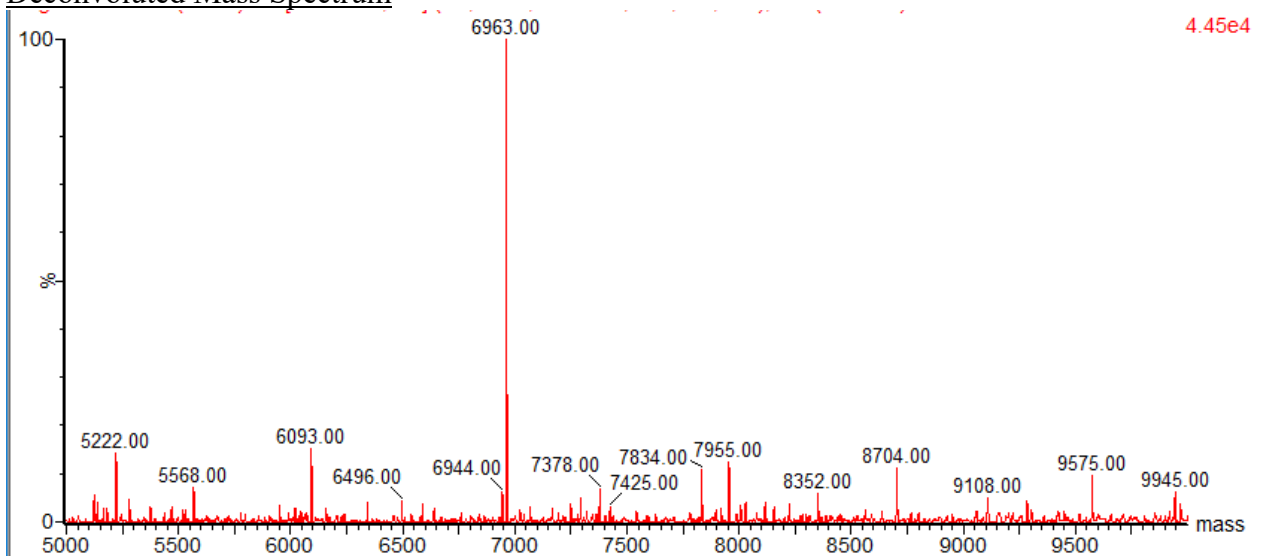

## LCMS Characterization of 48

Produced from **46** by General Procedure **2**:

Using **Ψ-2**

Yield (A260): 71%

Expected Mass: 7041.62

Expected (M-6)/6 Ion: 1172.6

Found Deconvoluted Mass: 7040

Found (M-6)/6 Ion: 1172.7

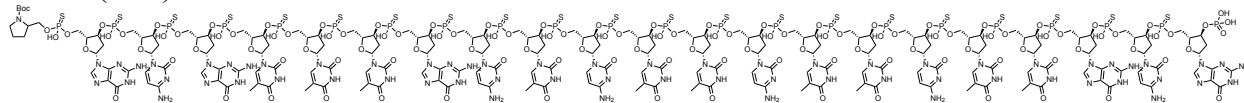

### A260 Chromatogram

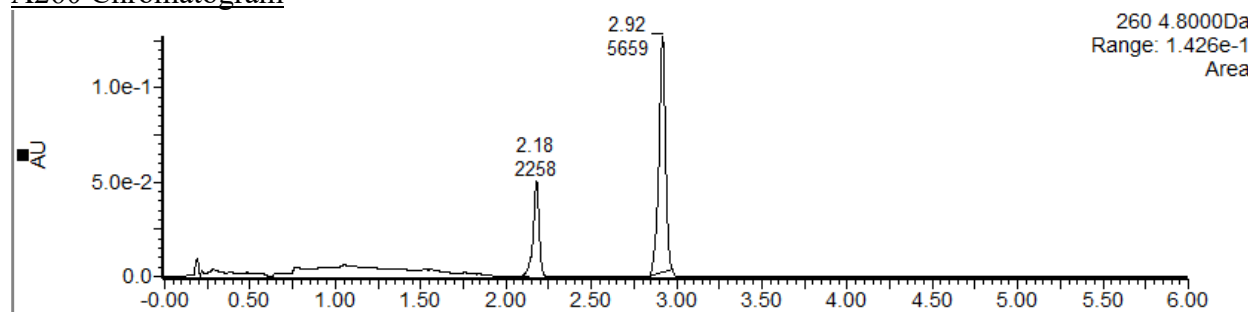



Mass Spectrum (RT= 2.92 min)

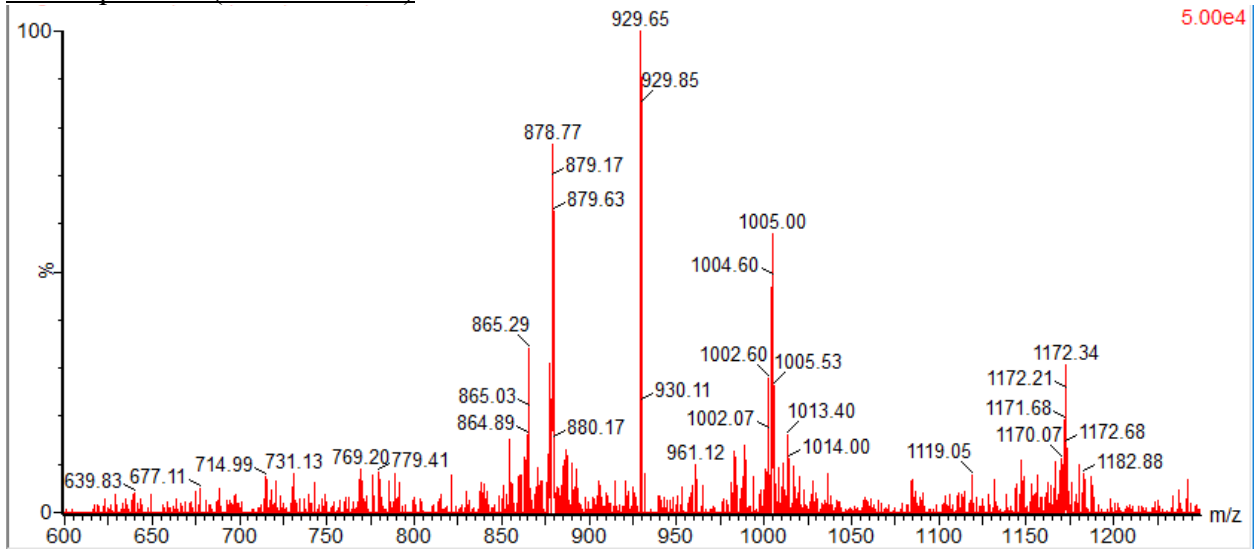

Deconvoluted Mass Spectrum

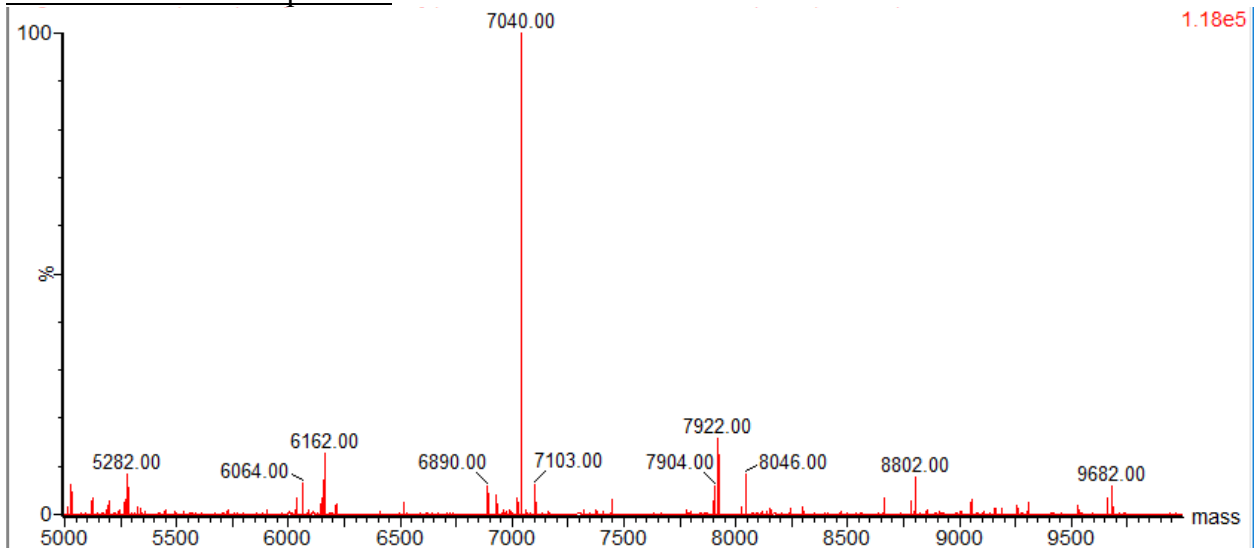

## LCMS Characterization of 49

Produced from 46 by General Procedure 2:

Using  $\Psi$ -12

Yield (A260): 74%

Expected Mass: 6964.54

Expected (M-6)/6 Ion: 1158.9

Found Deconvoluted Mass: 6964.0

Found (M-6)/6 Ion: 1159.2

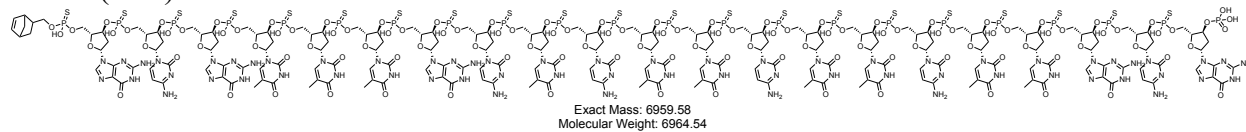

## A260 Chromatogram

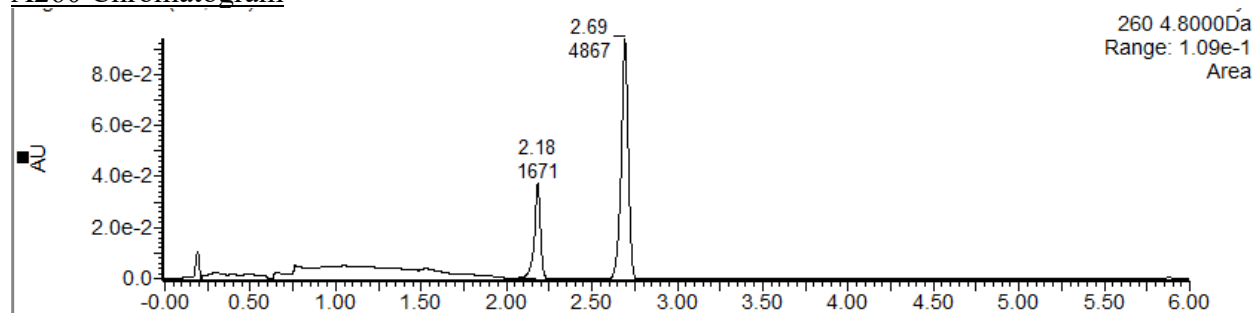

Mass Spectrum (RT = 2.69 min)

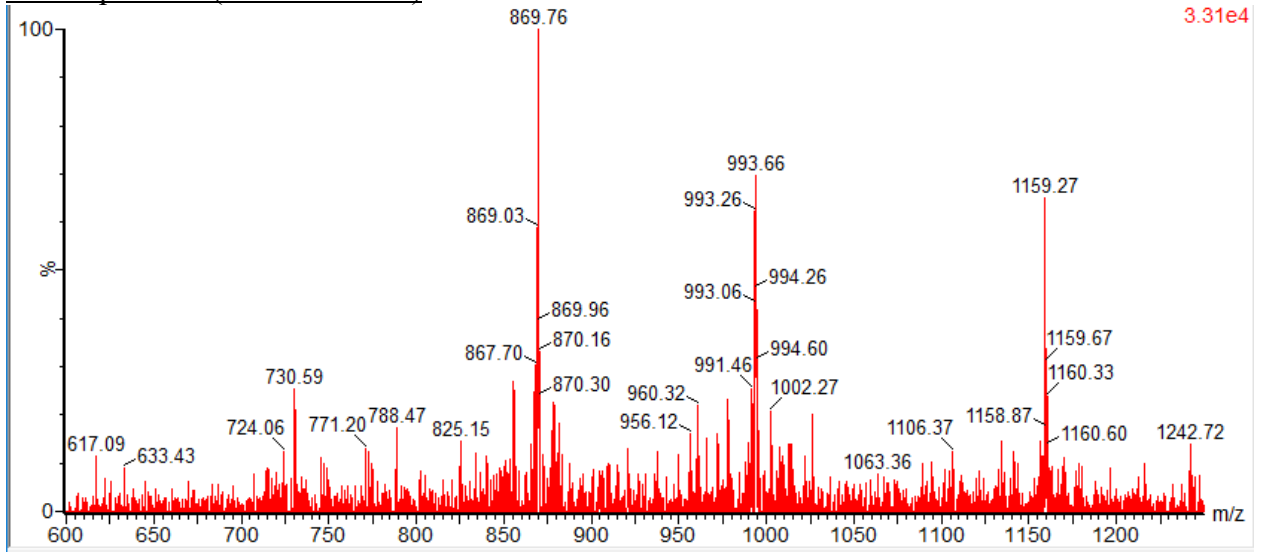

Deconvoluted Mass Spectrum

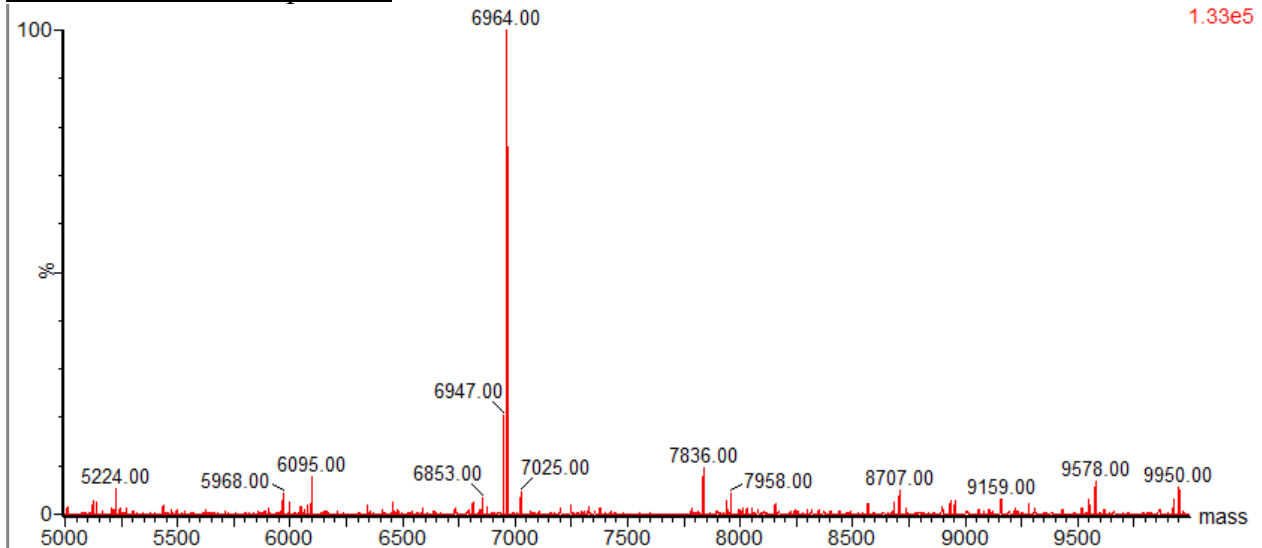

## LCMS Characterization of 50

Produced from 46 by General Procedure 2:

Using  $\Psi$ -3

Yield (A260): 81%

Expected Mass: 7015.54

Expected (M-6)/6 Ion: 1168.3

Found Deconvoluted Mass: 7015

Found (M-6)/6 Ion: 1168.07

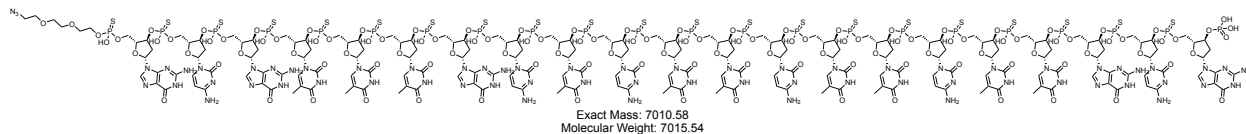

### A260 Chromatogram

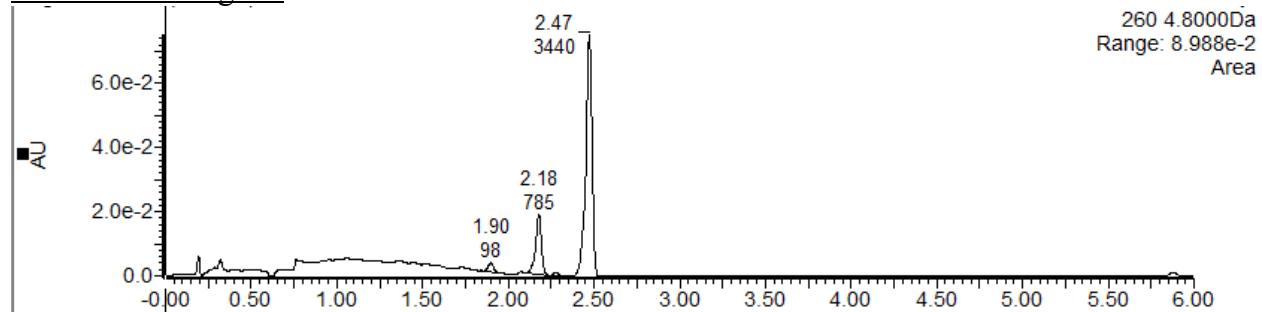

Mass Spectrum (RT= 2.47 min)

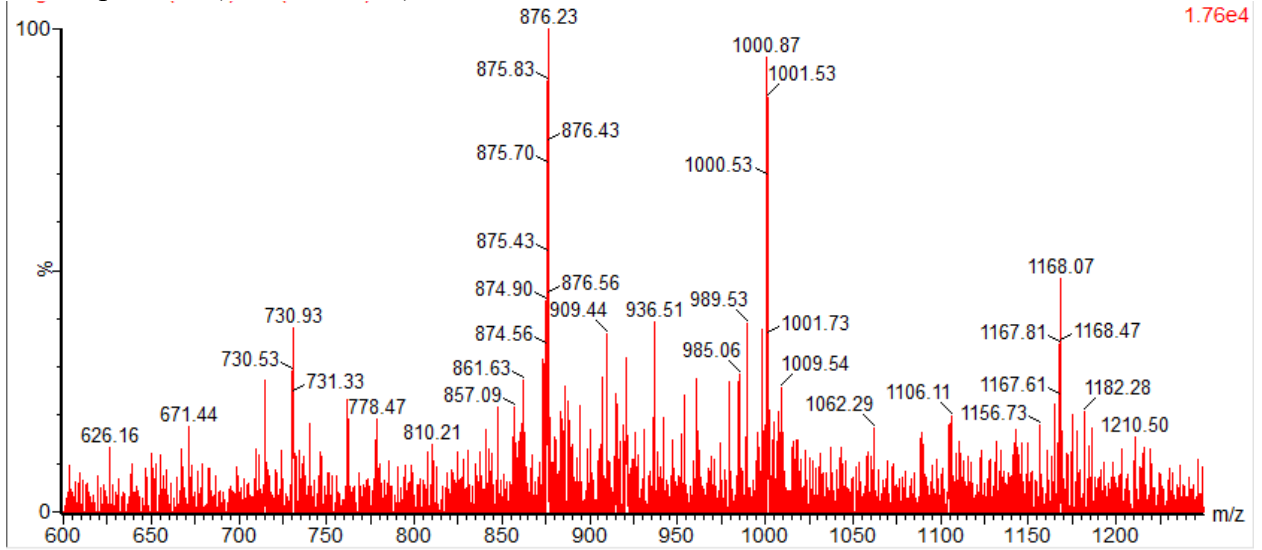

Deconvoluted Mass Spectrum

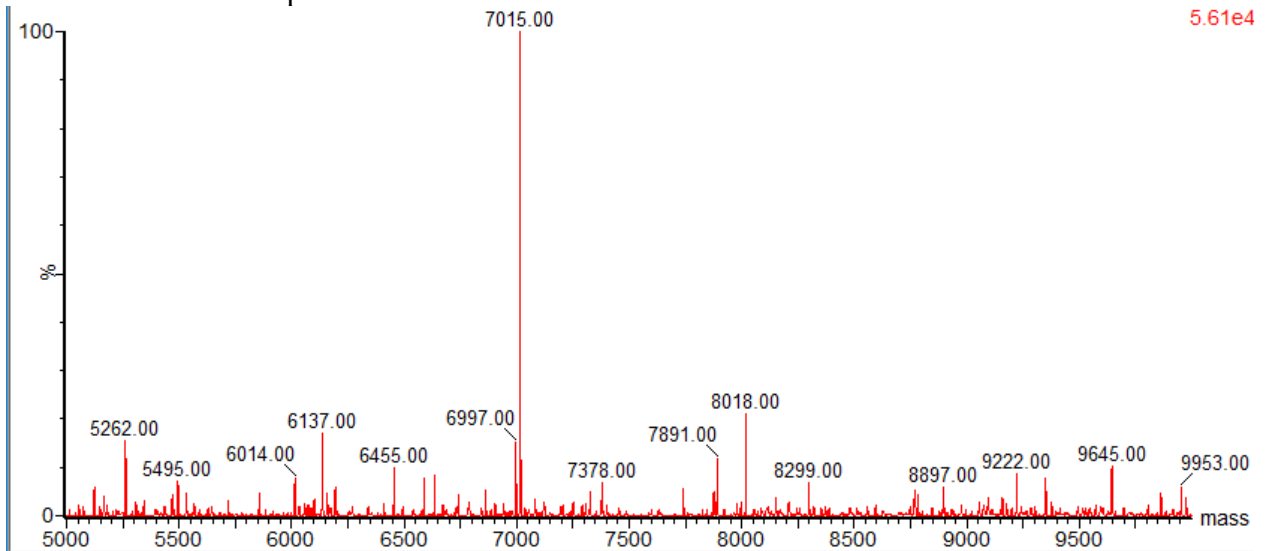

---

### LCMS Characterization of 52

Produced from **51** by General Procedure **3**:

Using **Ψ-16**

Yield (A260): 66%

Expected Mass: 6604

Expected (M-6)/6 Ion: 1099.6

Found Deconvoluted Mass: 6601.0

Found (M-6)/6 Ion: 1099.7

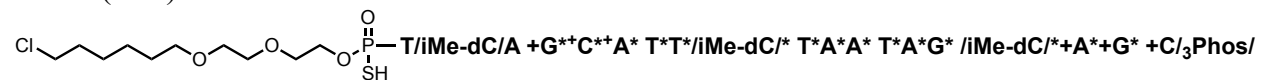

MW: 6616

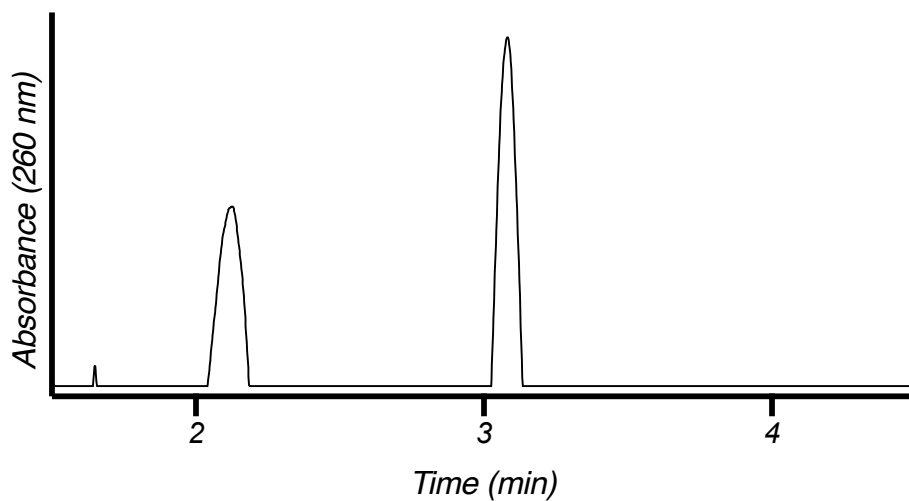

Raw Mass Spectrum Retention Time 3.08 min

8.06e:

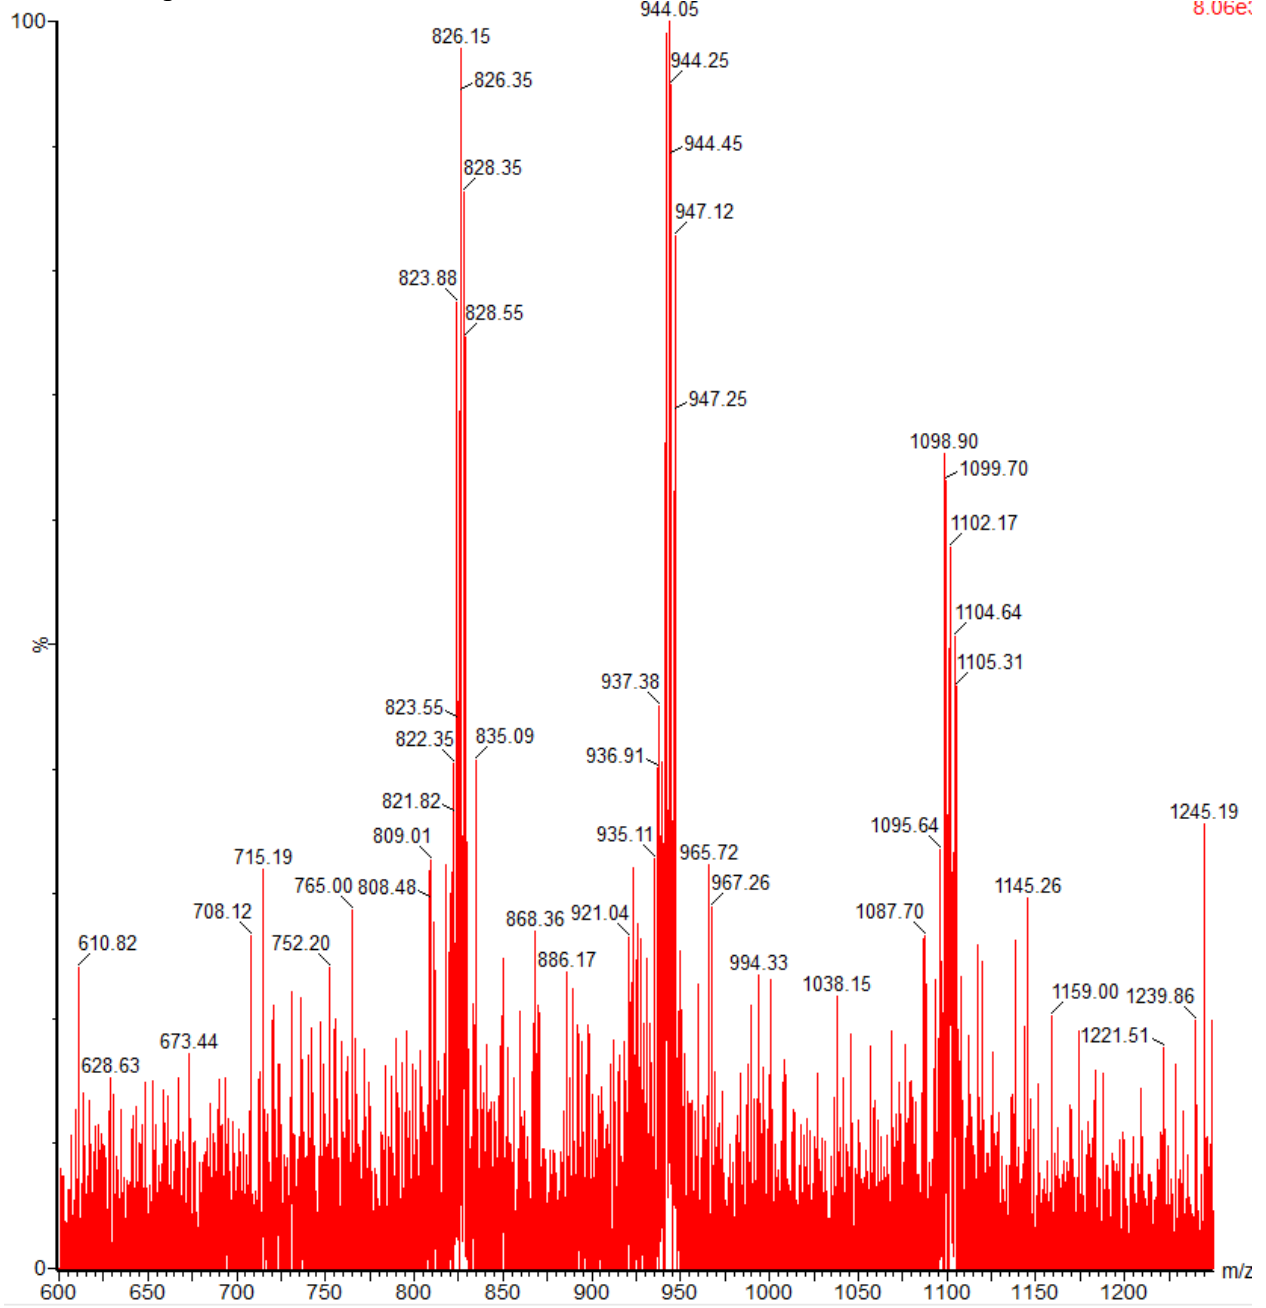

Deconvulted Mass Spectrum Retention Time 3.08 Minutes

4.54e4

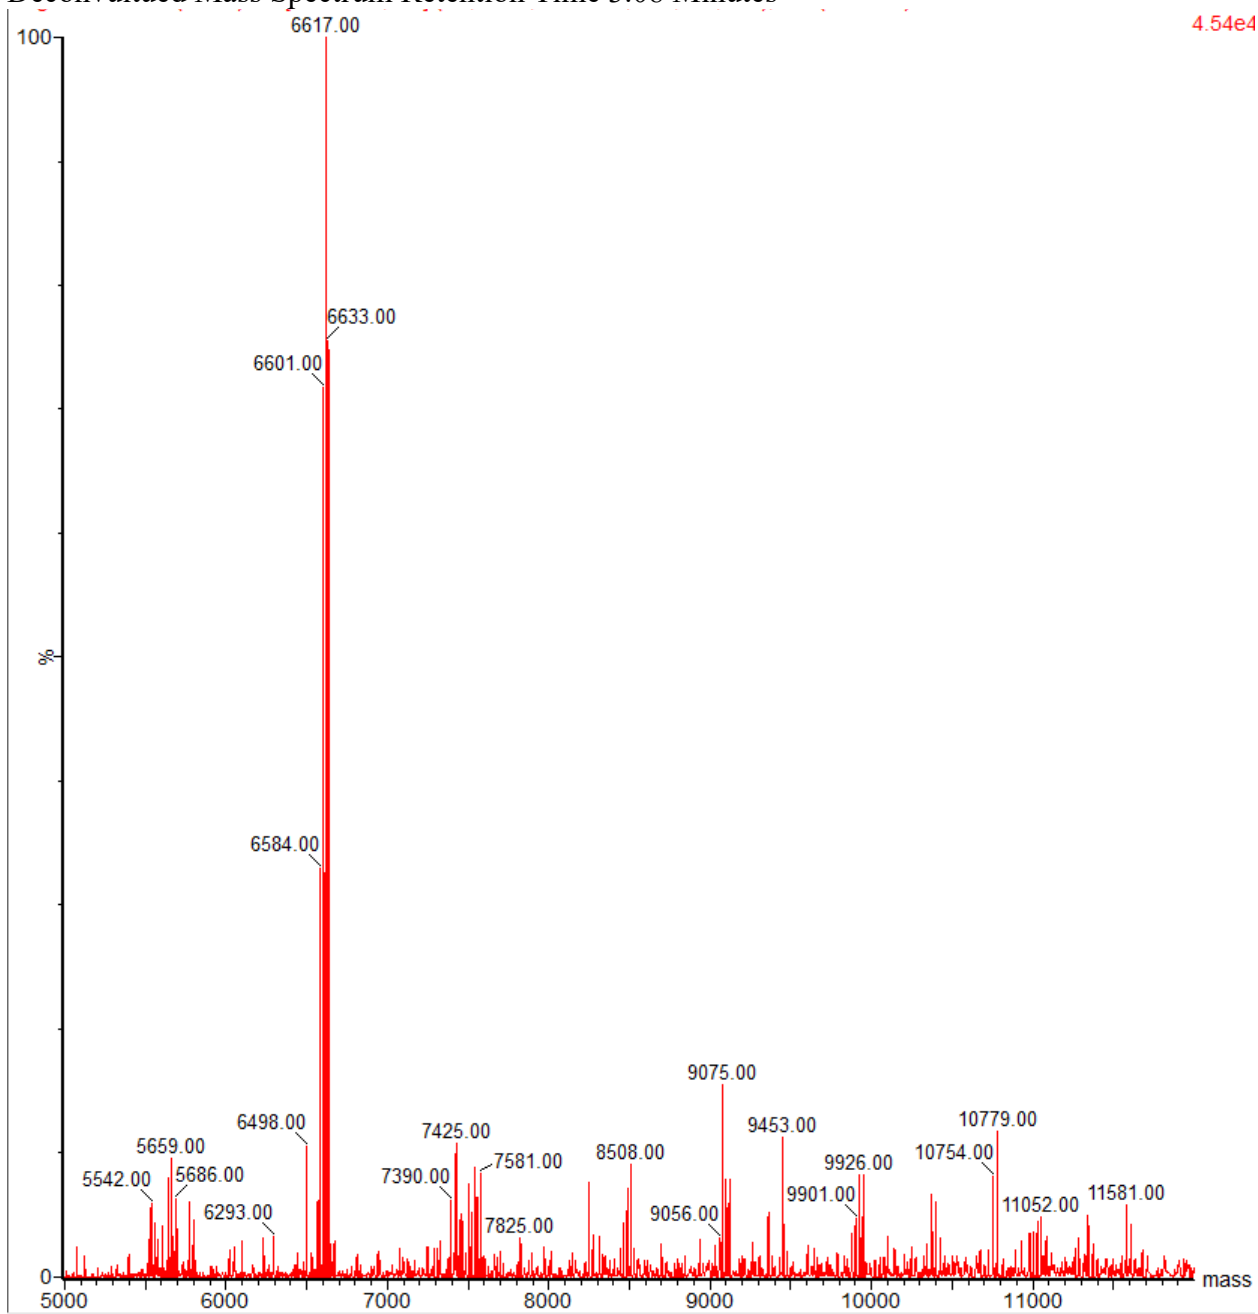



---

### LCMS Characterization of 53

Produced from **51** by General Procedure **3**:

Using **Ψ-8**

Yield (A260): 68%

Expected Mass: 6632

Expected (M-8)/8 Ion: 828

Found Deconvoluted Mass: 6636.0

Found (M-8)/6 Ion: 828.42

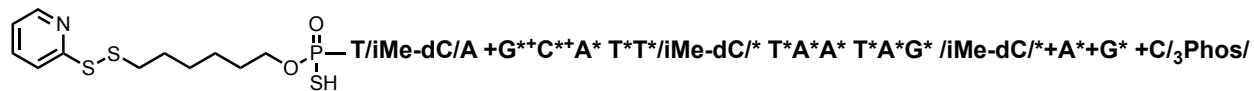

MW: 6632

A260

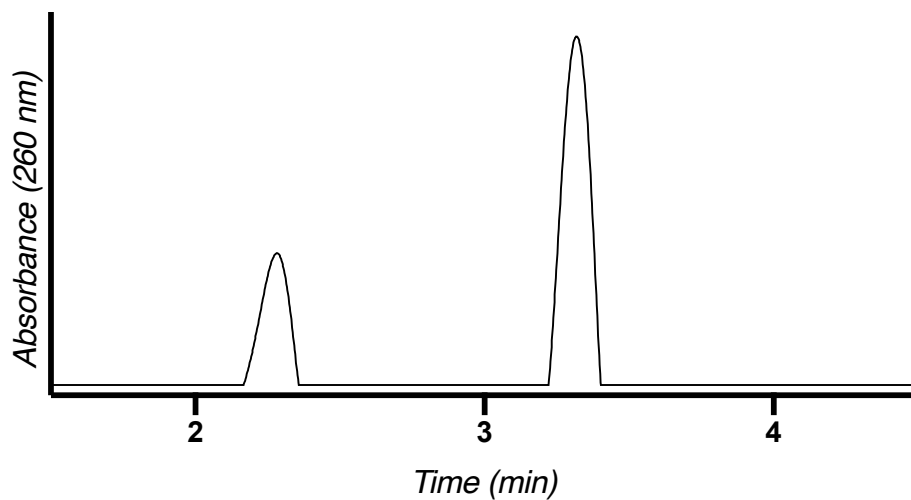

Raw Mass Spectrum Retention Time 3.32 Minutes

1.23e4

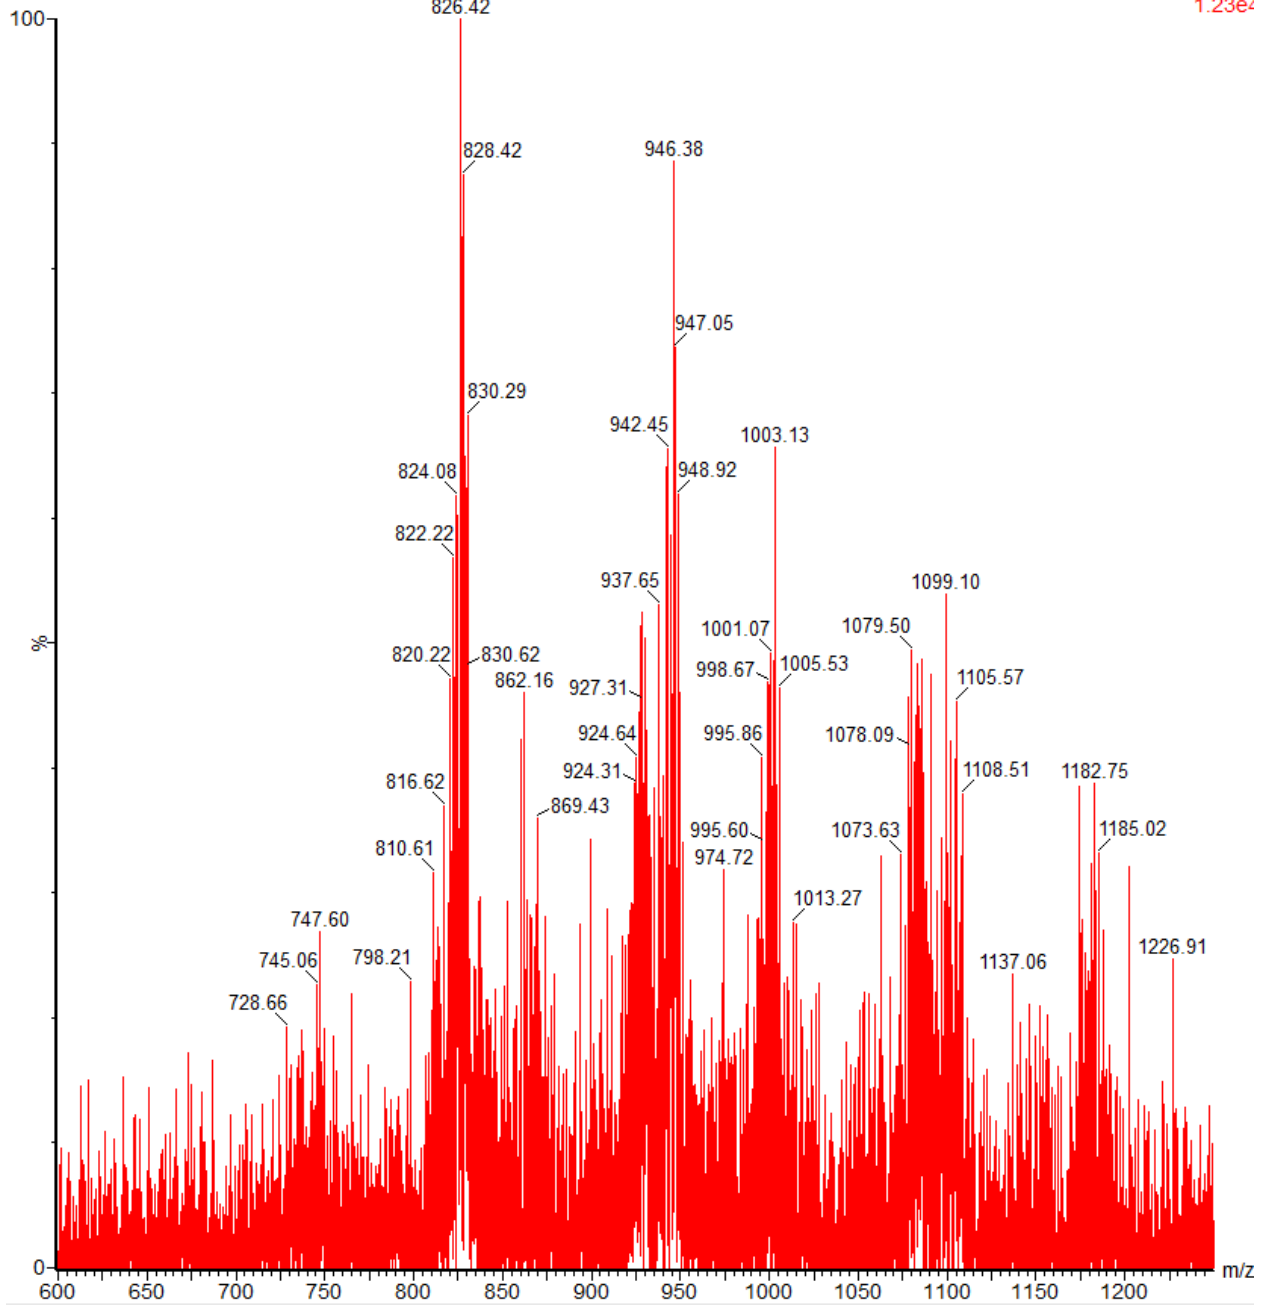

Deconvoluted Mass Spectrum Retention Time 3.32 Minutes

5.92e4

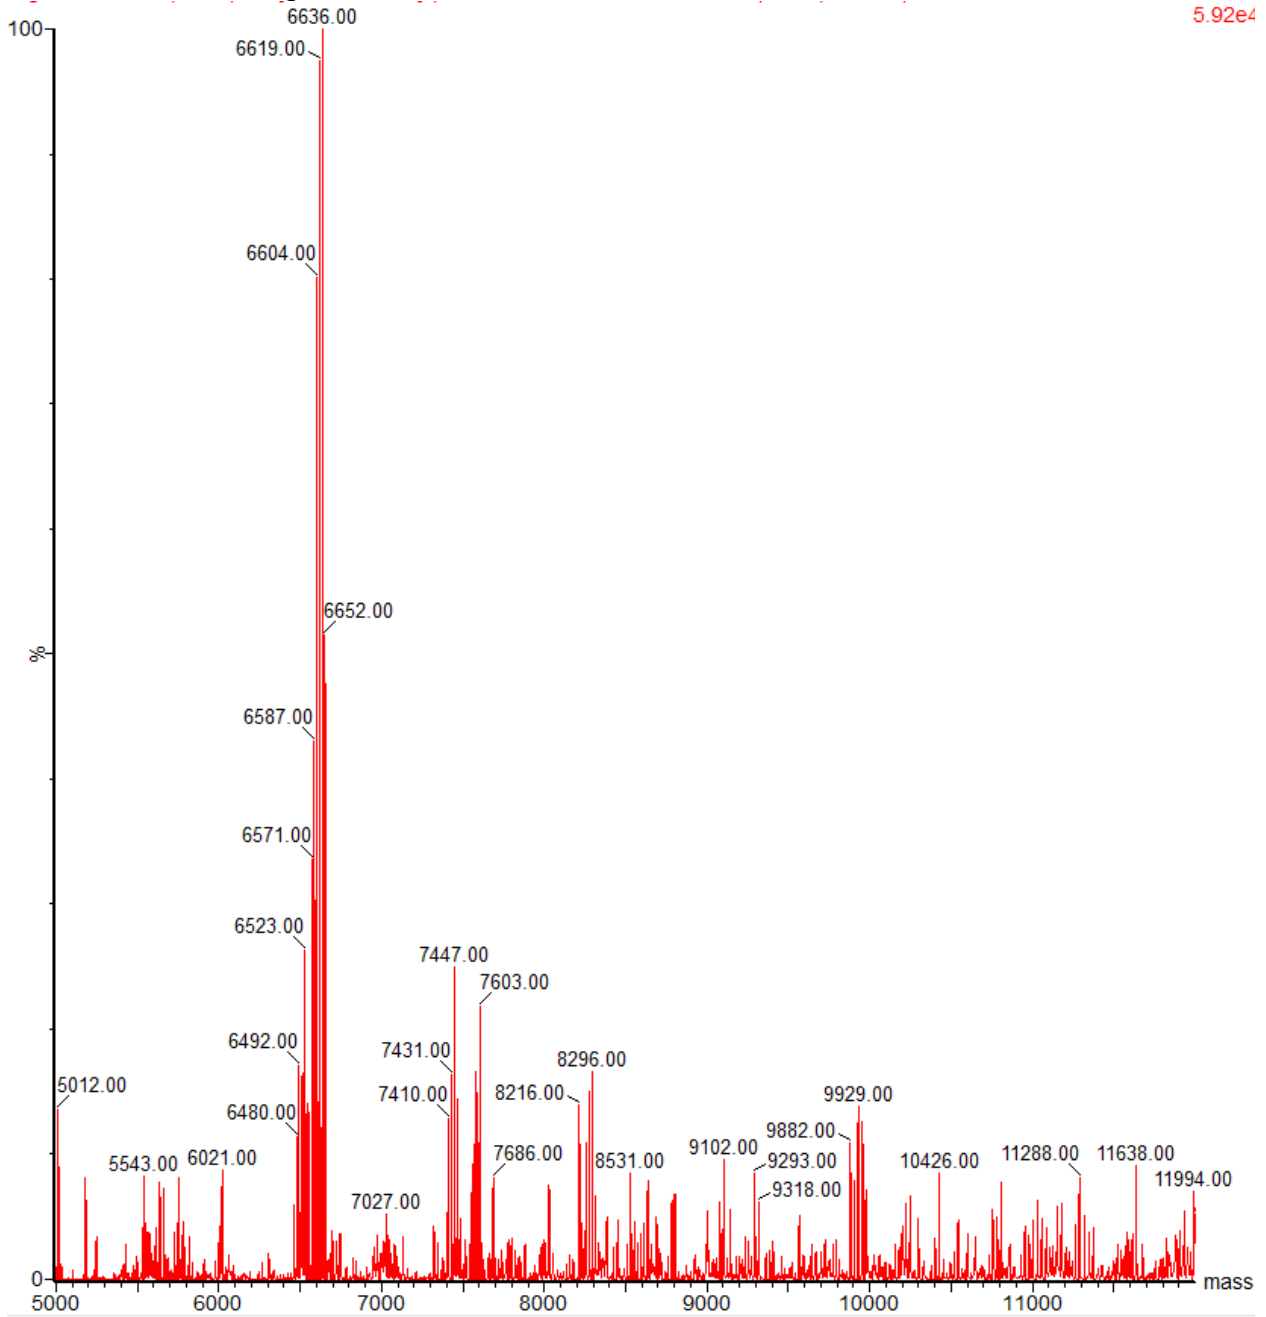

---

## SENDR on Aptamers:

### Aptamer compatibility protocol:

SENDR Aptamer compatibility was analyzed by performing reactions in microcentrifuge tube as described in *General Procedure 2*. Briefly, 5 nmol of aptamer **54** was loaded onto 100  $\mu\text{L}$  of equilibrated resin. This loaded resin was washed with DMA (500  $\mu\text{L}$  twice) and dry THF (500  $\mu\text{L}$  three times) and dried under vacuum.

To the loaded and dried resin, Using  $\Psi$ -4 in MeCN (150 mM, 250  $\mu\text{L}$ ) was added. Then DBU (450 mM, 18  $\mu\text{L}$ ) was added to the reaction mixture. The reaction tube was vortexed for 30 seconds and incubated at 37°C for 60 minutes. The reactions were worked up by aspirating and discarding the reaction solution, and washing the resin bed with MeCN (500  $\mu\text{L}$ ) and 1:1 MeCN:PBS (500  $\mu\text{L}$ ). Elute buffer (300  $\mu\text{L}$ ) was added to the resin bed and the tube was agitated by orbital shaker for 5-10 minutes. The DNA containing elution buffer was collected. DNA was isolate *via* ethanol precipitation. Ethanol precipitation was performed by adding 10% v/v of a NaCl solution (30  $\mu\text{L}$ , 5M) to the elute buffer and three volumes of cold ethanol (-20 °C) were added to the tube (~1000 $\mu\text{L}$ ) and incubated for 18 hours at -20 °C. The tube was then centrifuged at 13,000 rpm for 15 minutes to pellet the DNA, and the extra ethanol was decanted off. The tubes were dried *via* speed vacuum and the DNA was dissolved and HPLC-MS analysis was performed.

## LCMS Characterization of 55

Produced from **54** by General Procedure **2**:

Using **Ψ-4**

Yield (A260): 70%

Expected Mass: 18353.88

Expected (M-15)/15 Ion: 1221.99

Found Deconvoluted Mass: 18350

Found (M-6)/6 Ion: 1221.84

5'—A-T-A-C-C-A-G-C-T-T—A-T-T-C-A-A-T-T-A-G—C-A-A-C-A-T-G-A-G-G—G-G-G-A-T-A-G-A-G-G—

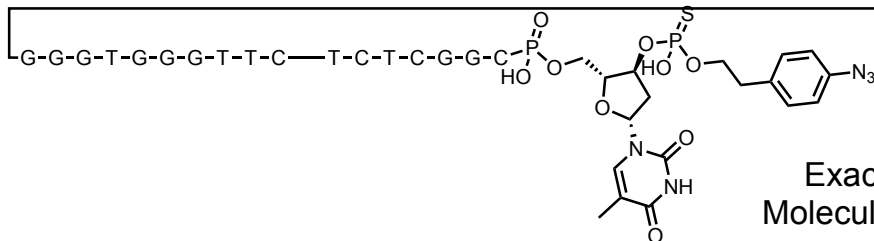

### A260 Chromatogram

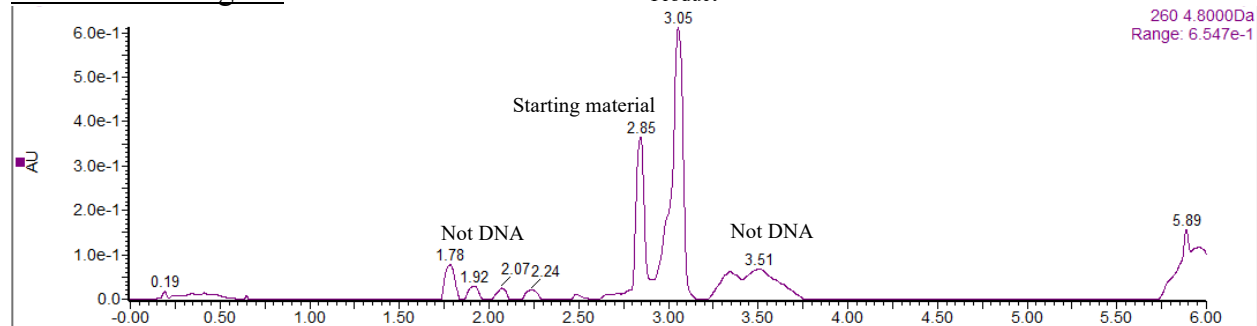

### TIC Chromatogram

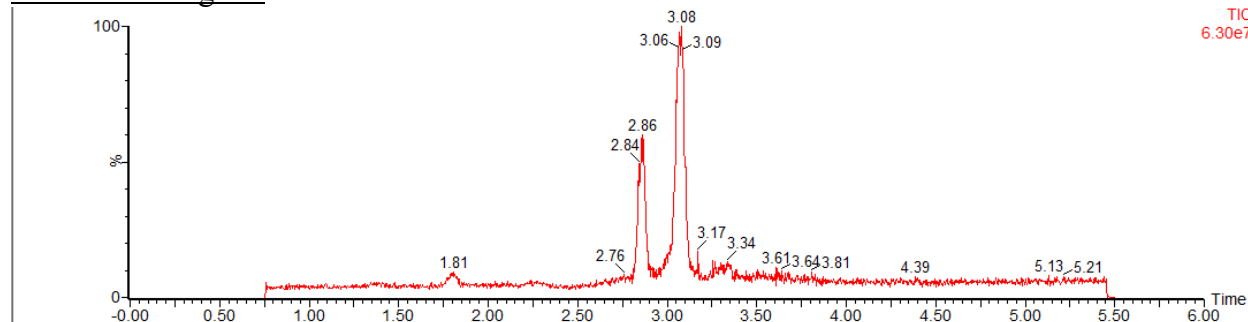

Mass Spectrum (RT= 3.05 min)

2.56e6

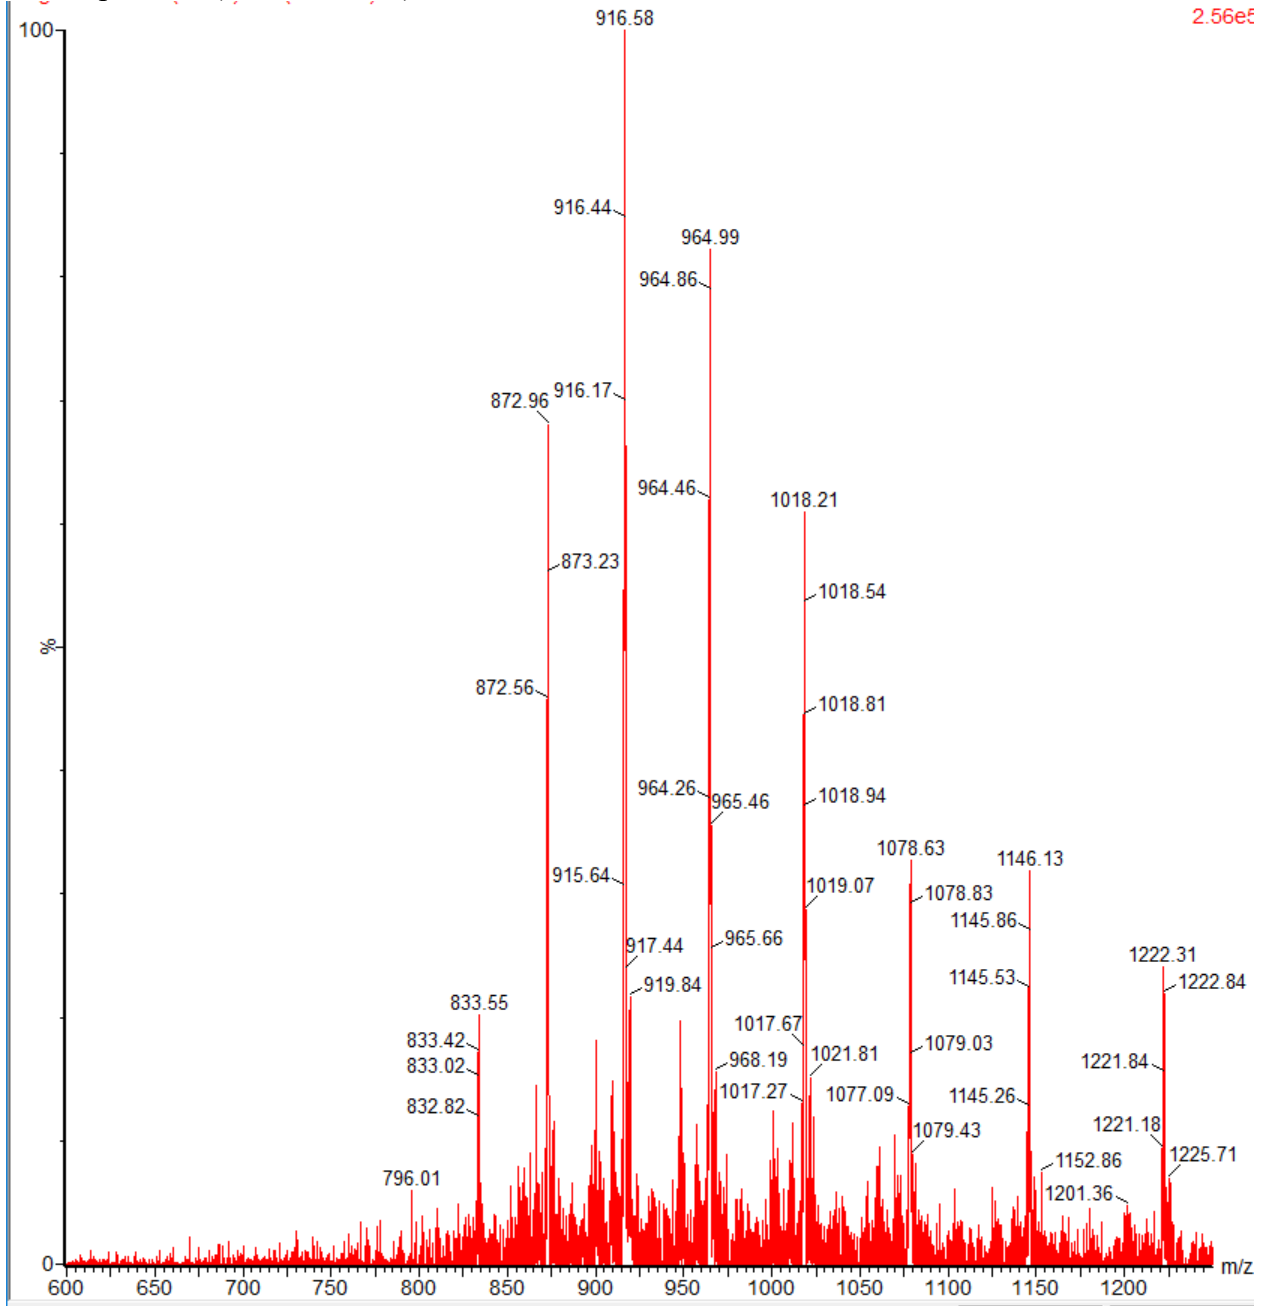

# Deconvoluted Mass Spectrum

7.43e

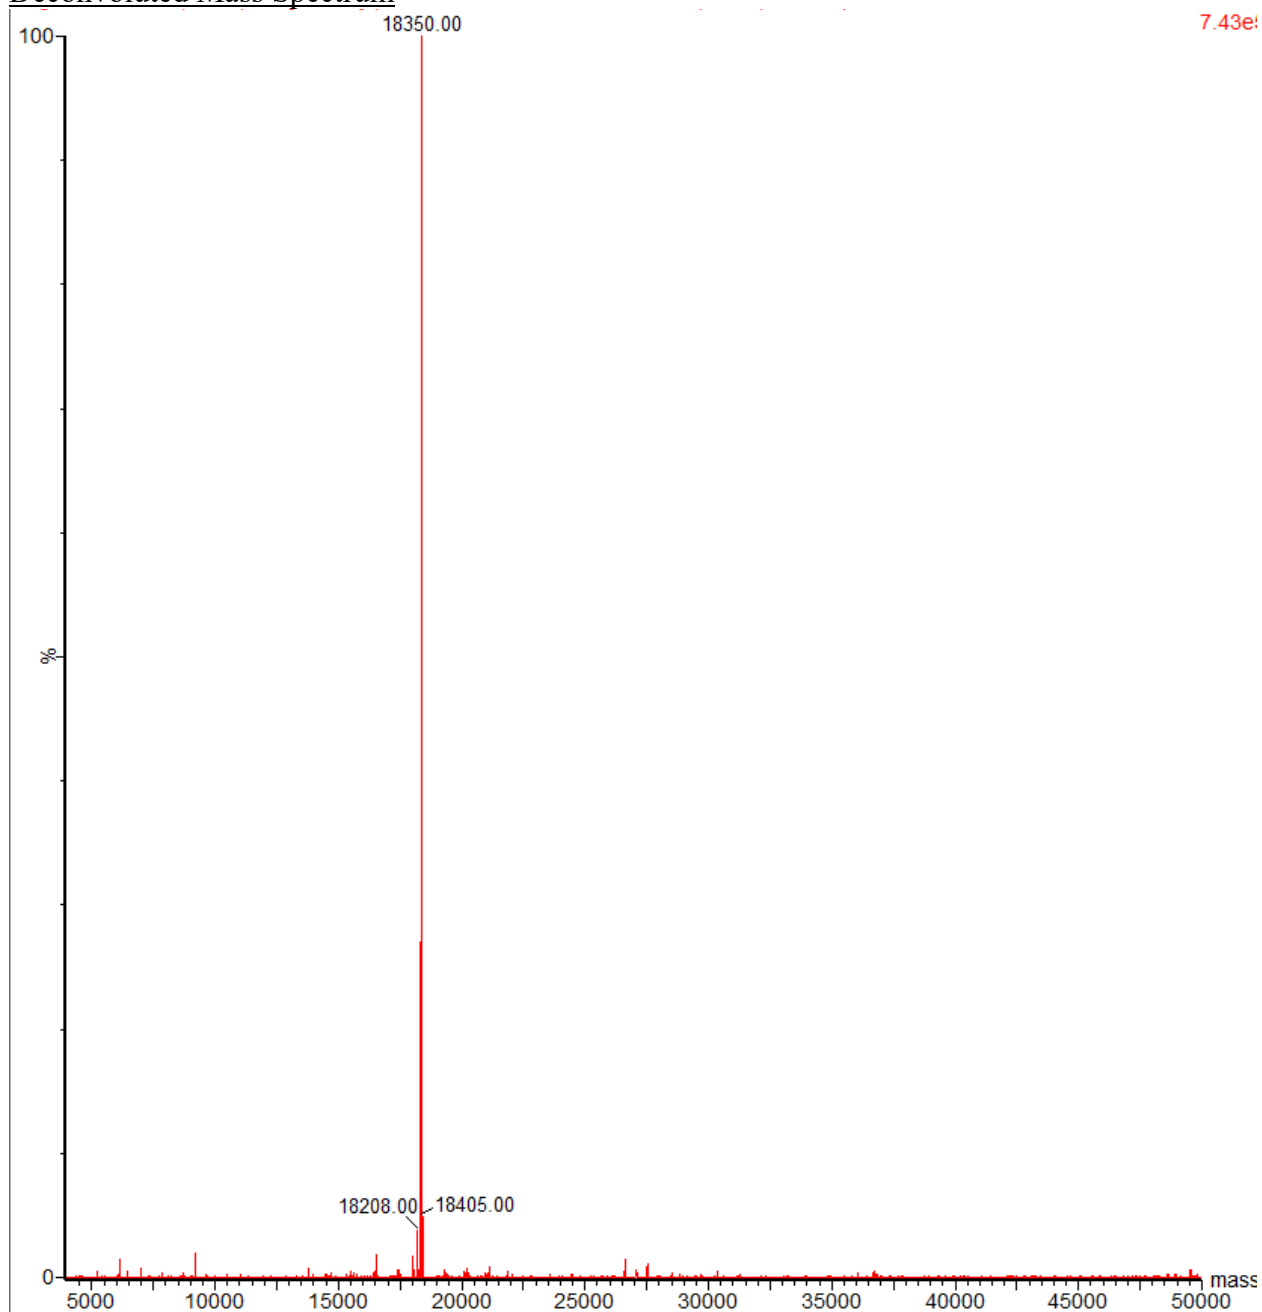

---

## Synthesis of Electrophile Modified hNE Aptamers **R/S-(57)**

Aptamer **56** was used in two SENDR protocols according to General Procedure 3 with both enantiomers of **Ψ-14**. Reaction conditions were slightly altered to increase conversion, PSI was used at 150 mM and the reaction was run at 37°C for 60 minutes. Modified aptamers **R-(57)** and **S-(57)** were isolated by ethanol precipitation. After ethanol precipitation unlabeled aptamer **56** was selectively degraded by ExoIII. In short, 10 ug of **S-(57)** or **R-(57)** were loaded into a PCR tube in 40  $\mu$ L water. To each tube CutSmart® (5  $\mu$ L, 10x), water (3  $\mu$ L), and ExoIII (2 $\mu$ L) was added. The reactions were vortexed and incubated at 37°C for 60 minutes at which point the ExoIII was thermally inactivated at 75°C for 10 minutes. The resulting DNA constructs were isolated by ZymoSpin oligo clean and concentrator column.



Analysis of **S-57**

**LCMS Characterization of S-57/ After SENDR**

Produced from **56** by General Procedure **2**:

Using **(-)-Ψ-14**

Yield (A260): 76%

Expected Mass: 13286.6

Found Deconvoluted Mass: 13288.0

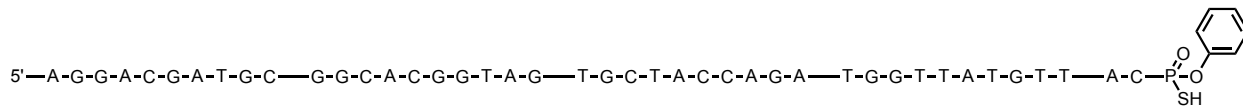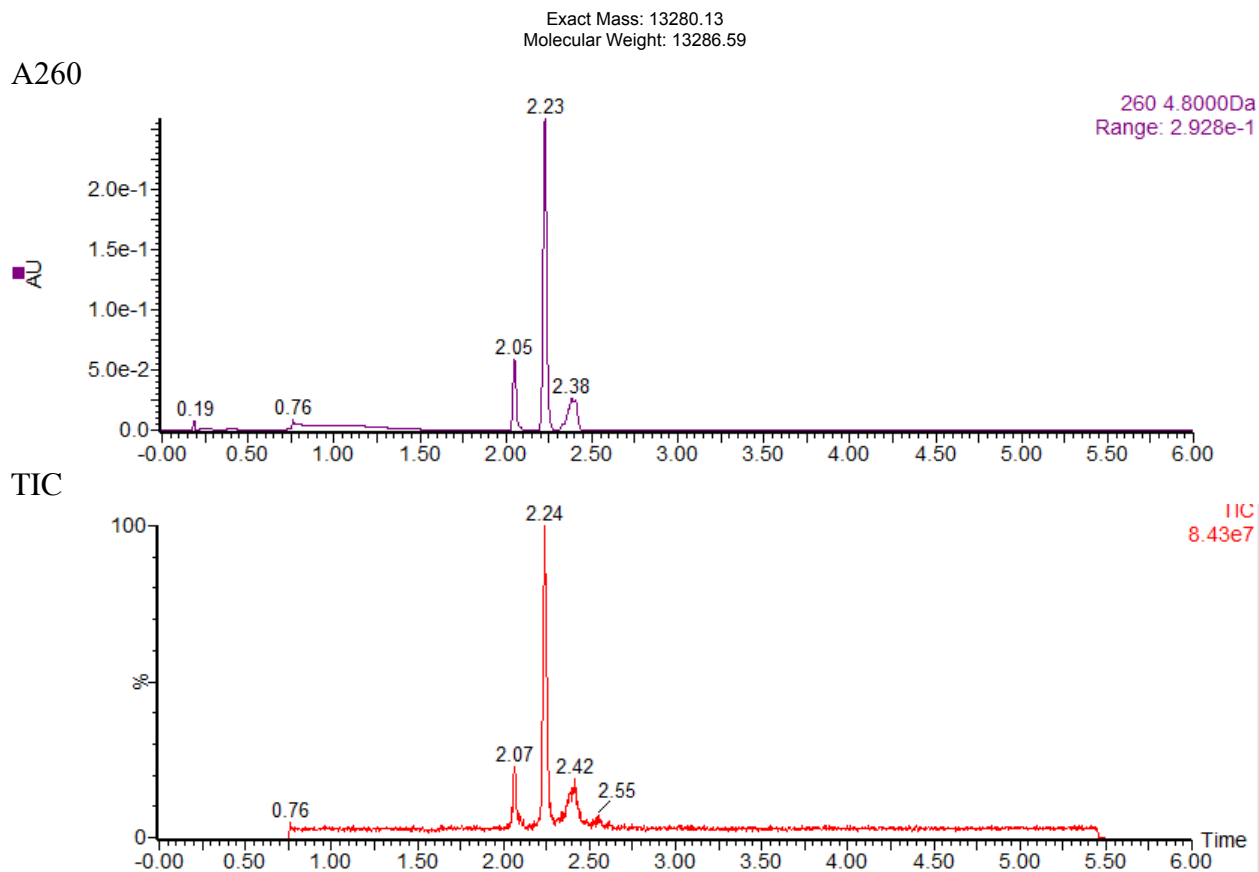

Raw Mass Spectrum RT = 2.24

2.60e5

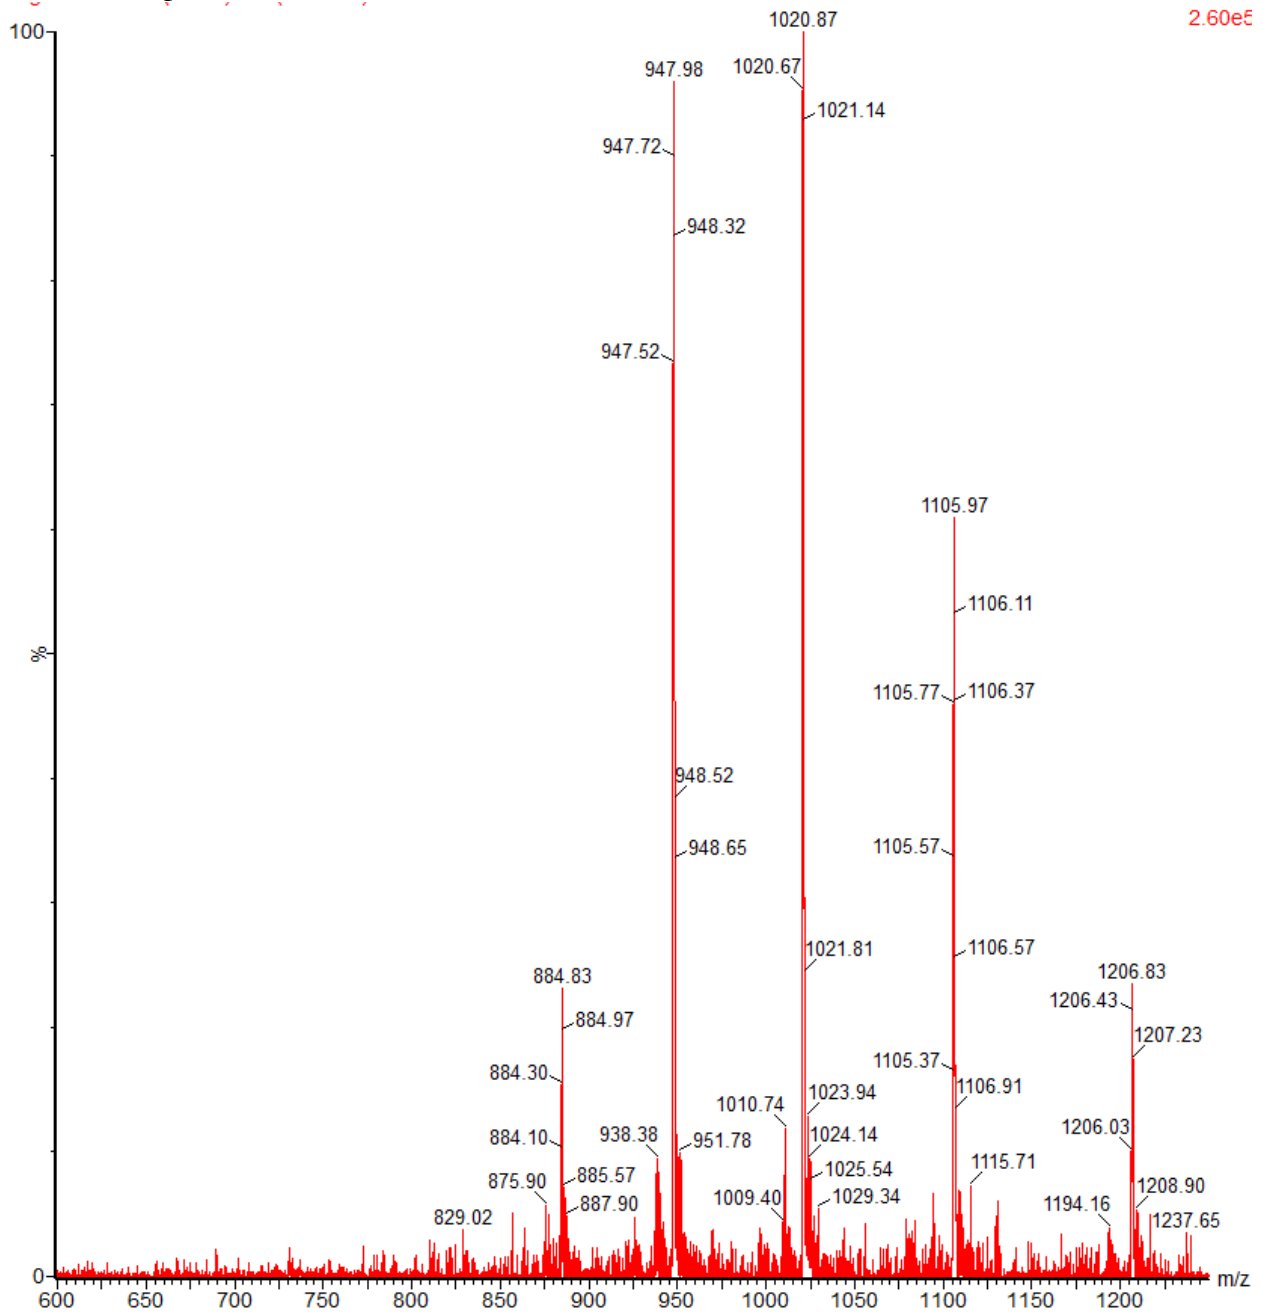

# Deconvoluted Mass Spectrum

6.09e5

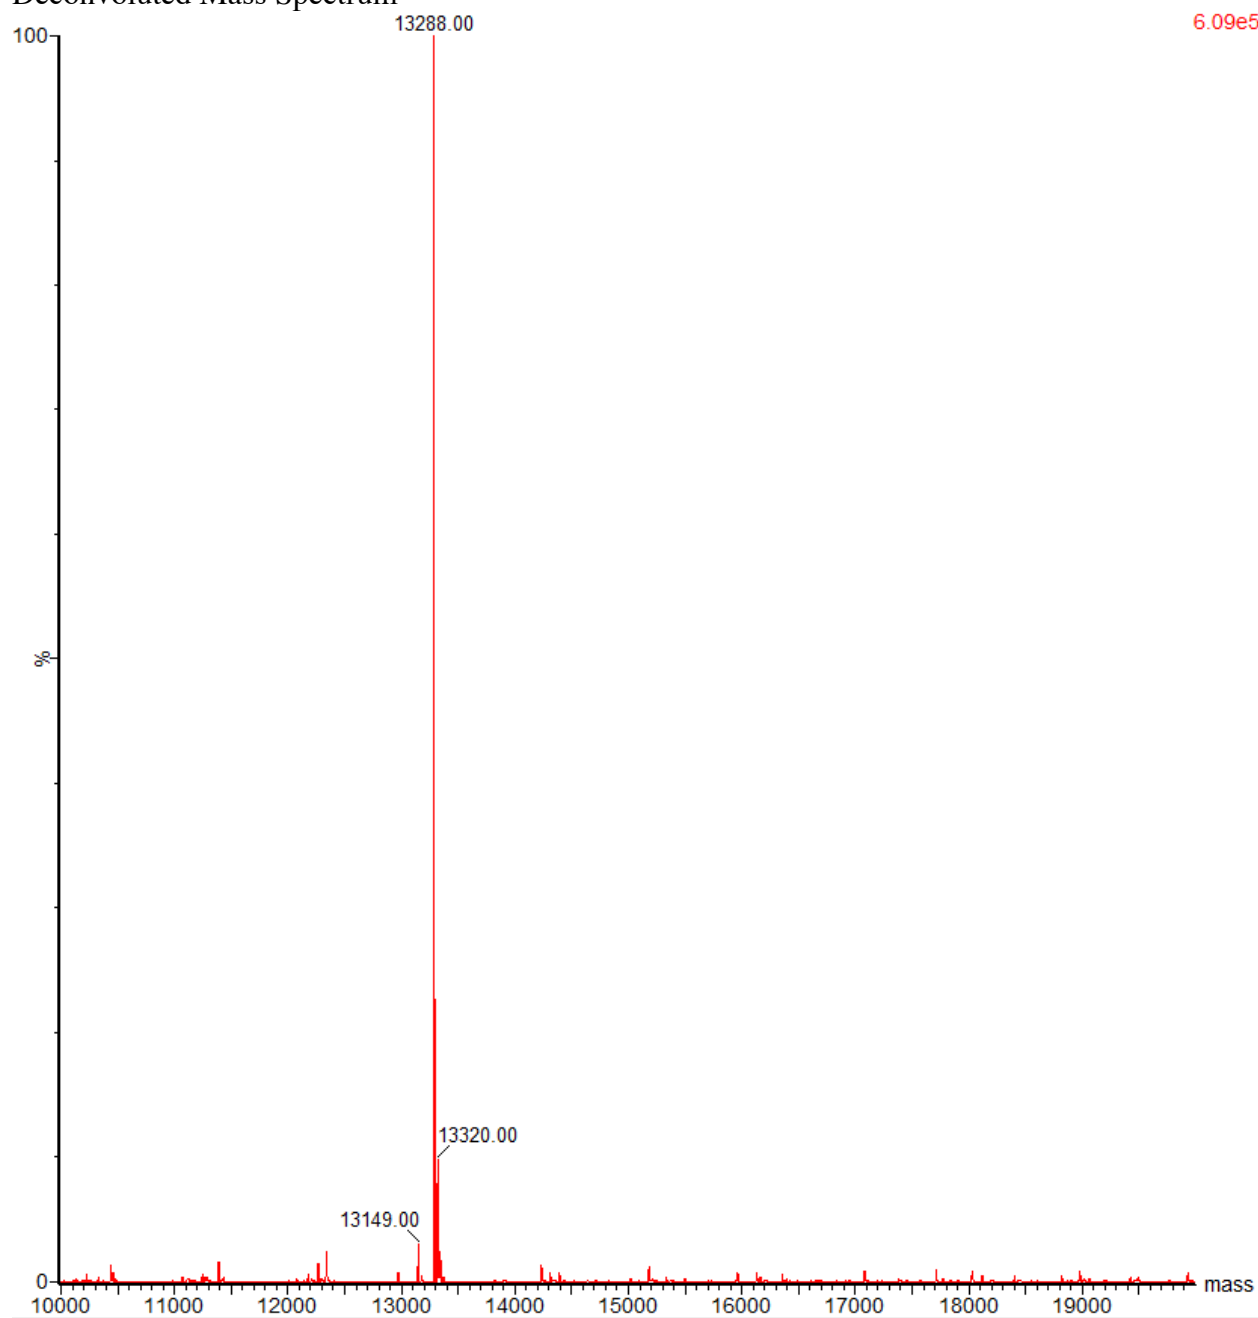

Analysis of S-57

LCMS Characterization of S-57/ After ExoIII Digestion

Using (-) $\Psi$ -14

Yield (A260): 91%

Expected Mass: 13286.6

Found Deconvoluted Mass: 13287.0

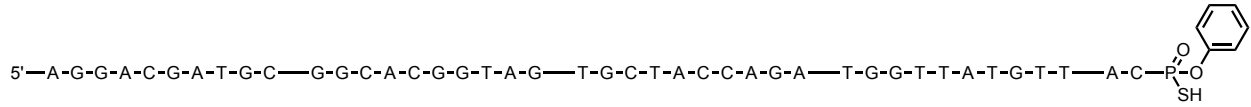

Exact Mass: 13280.13  
Molecular Weight: 13286.59

A260

oligo03605

2: Diode Array  
260 4.8000Da  
Range: 1.868e-1

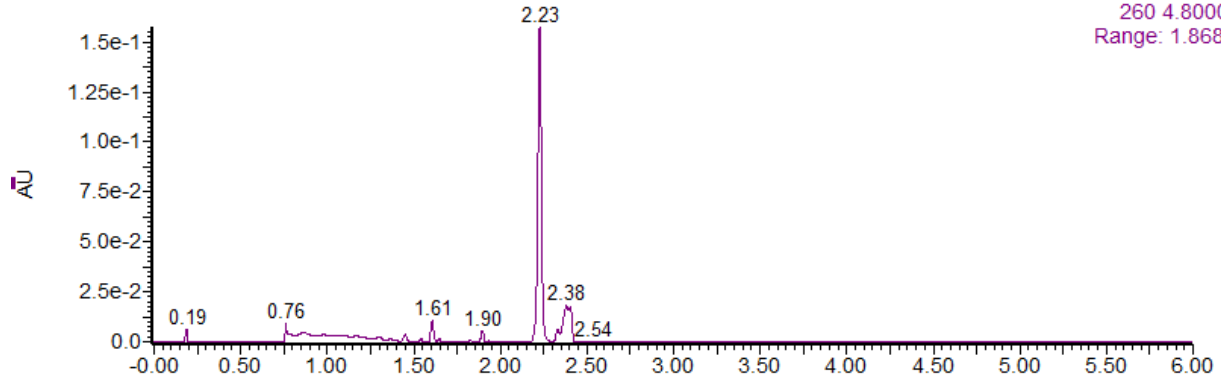

TIC

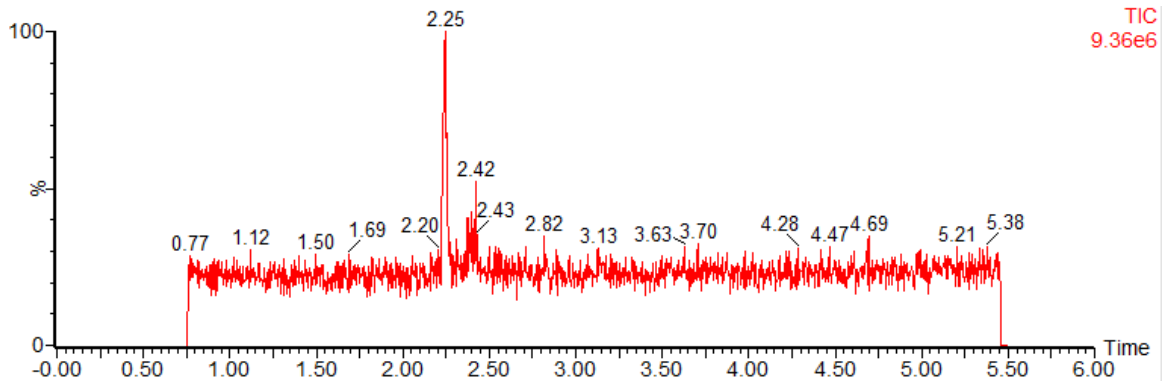

Deconvoluted Mass Spectrum RT = 2.25

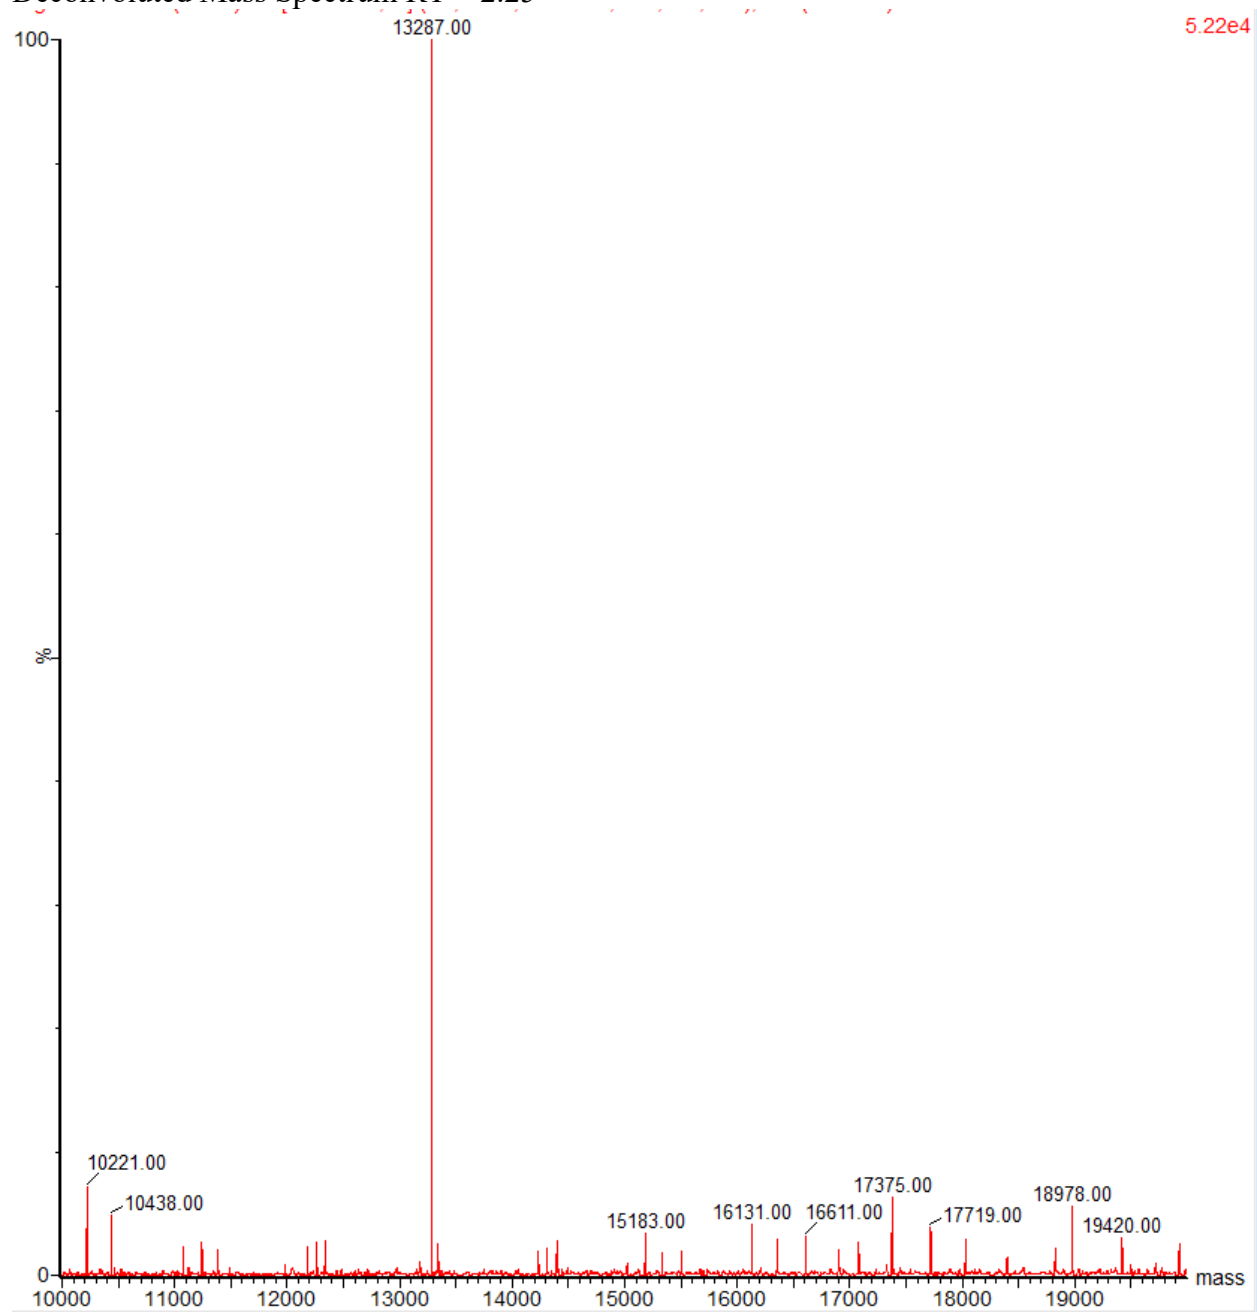

Analysis of **R-57**

LCMS Characterization of **R-57/ SEDNR**

Using **(+)Ψ-14**

Yield (A260): 63%

Expected Mass: 13286.6

Found Deconvoluted Mass: 13286.0



Exact Mass: 13280.13  
Molecular Weight: 13286.59

A260

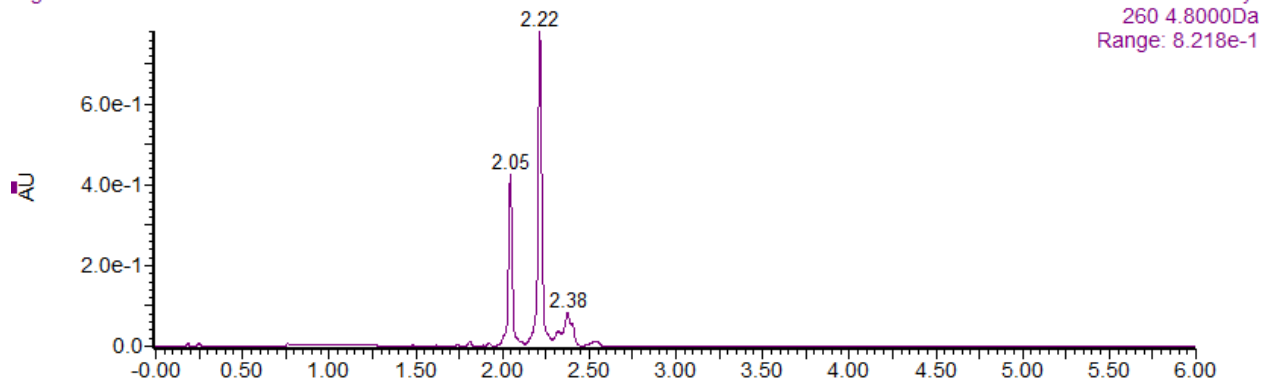

TIC

Oligo03603

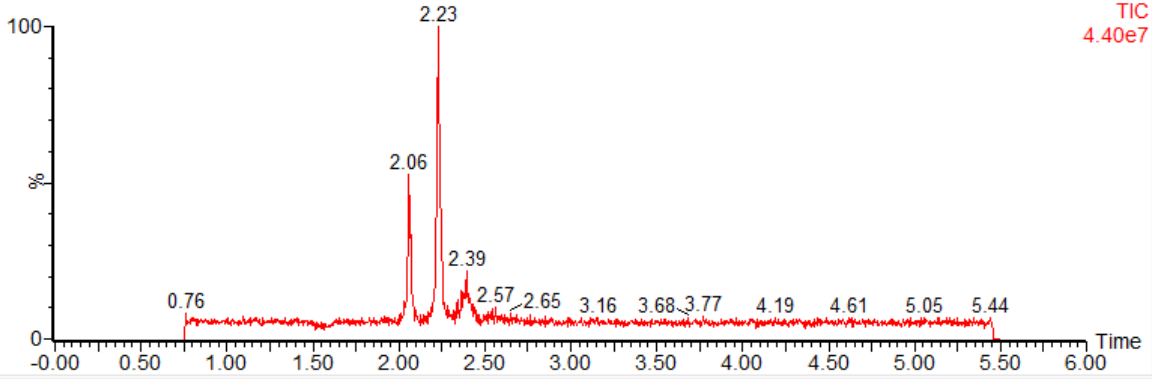

Raw Mass Spectrum RT = 2.22 minutes

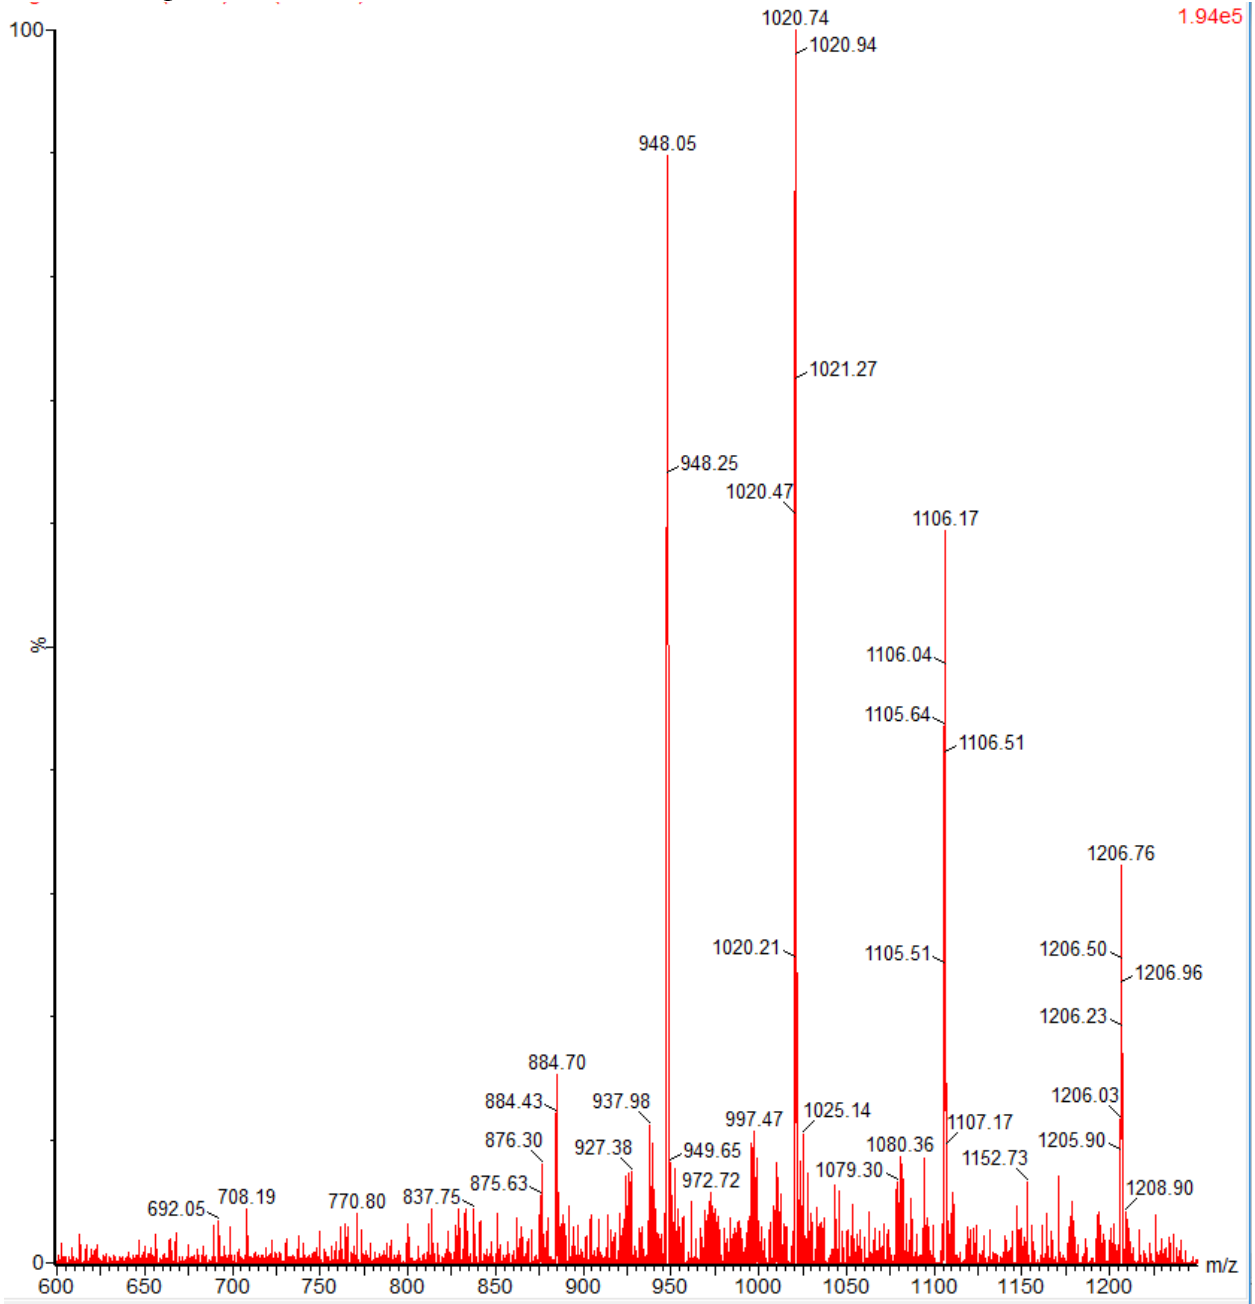

Deconvoluted Mass Spectrum RT = 2.22 Minutes

4.71e5

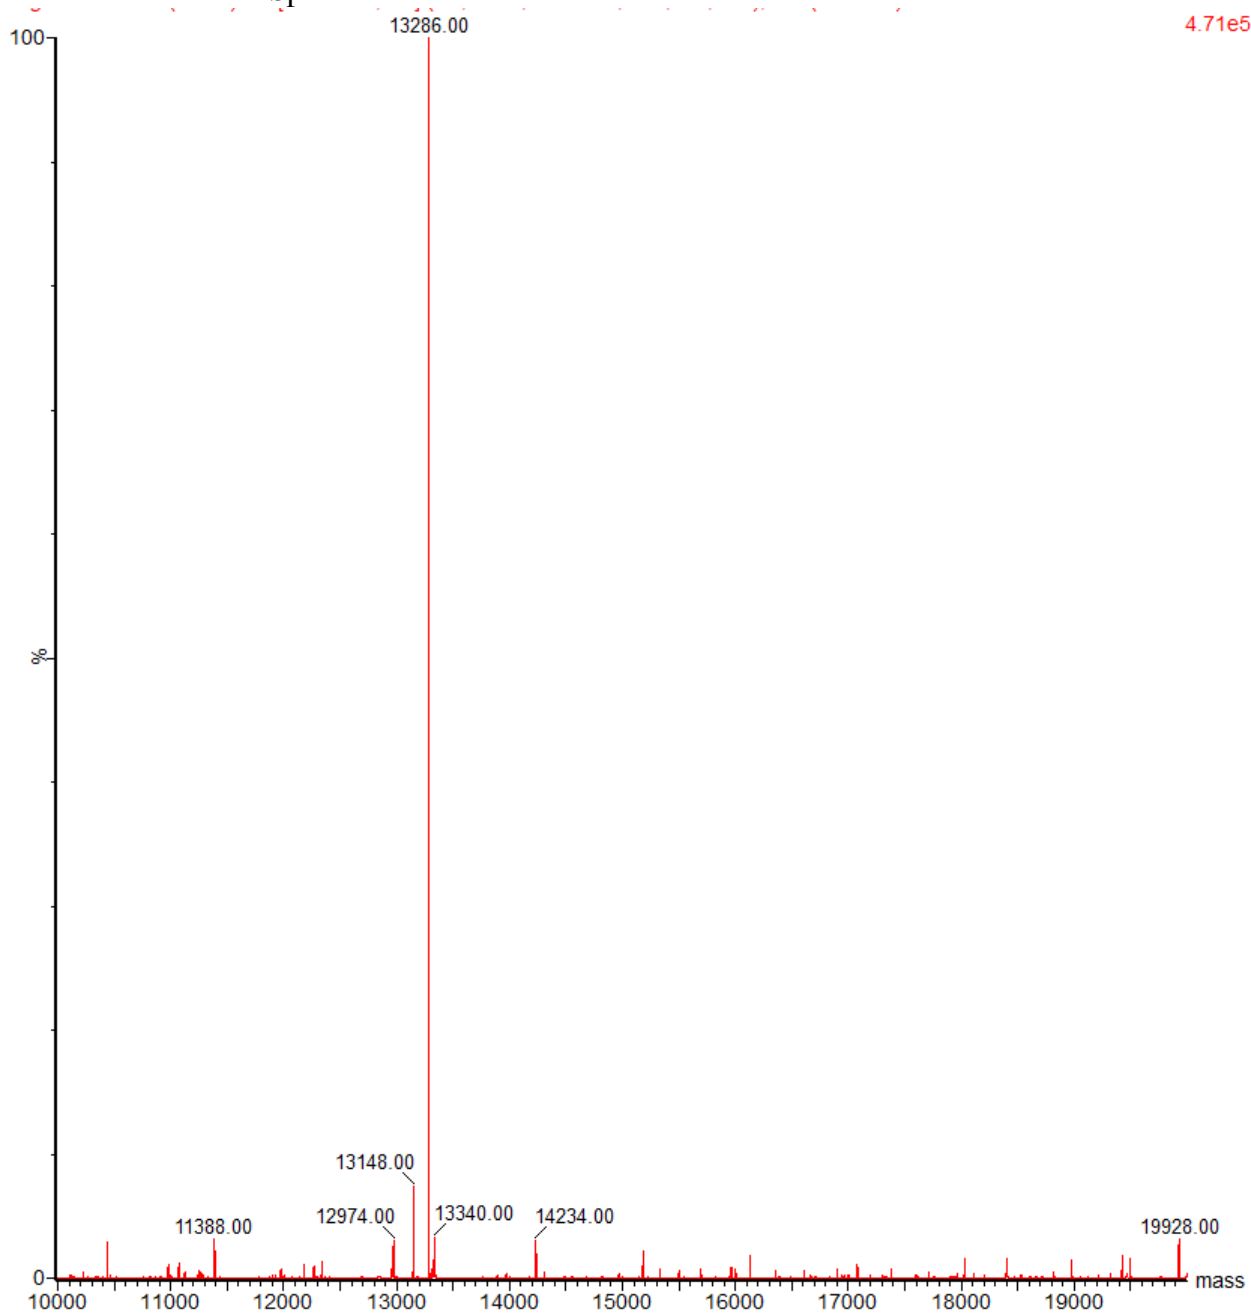



Analysis of **R-57**  
LCMS Characterization of **R-57/ After EXOIII**

Using (+) $\Psi$ -14

Yield (A260): 83%

Expected Mass: 13286.6

Found Deconvoluted Mass: 13287.0

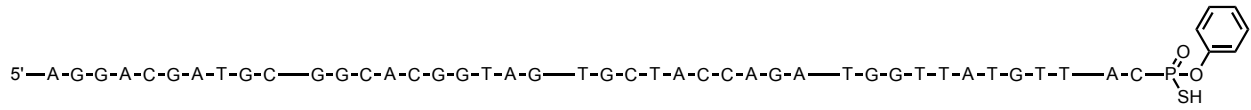

Exact Mass: 13280.13  
Molecular Weight: 13286.59

A260

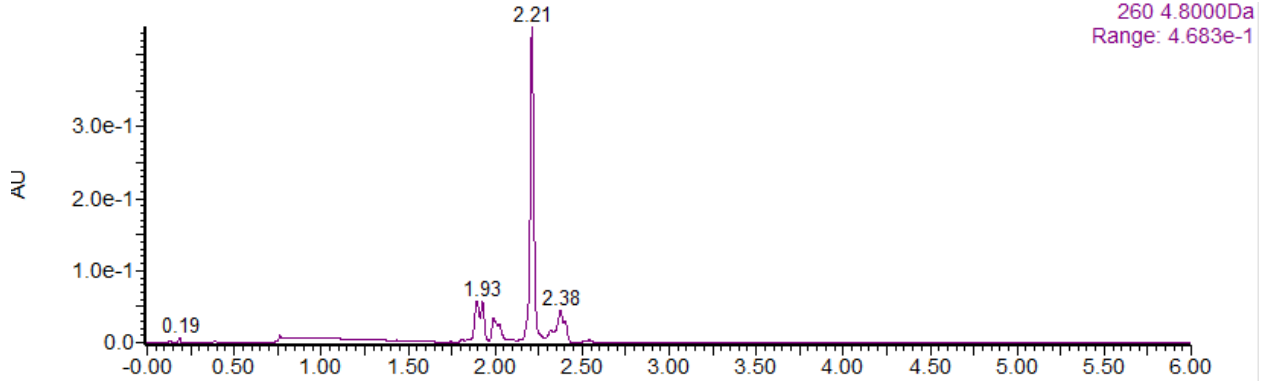

TIC

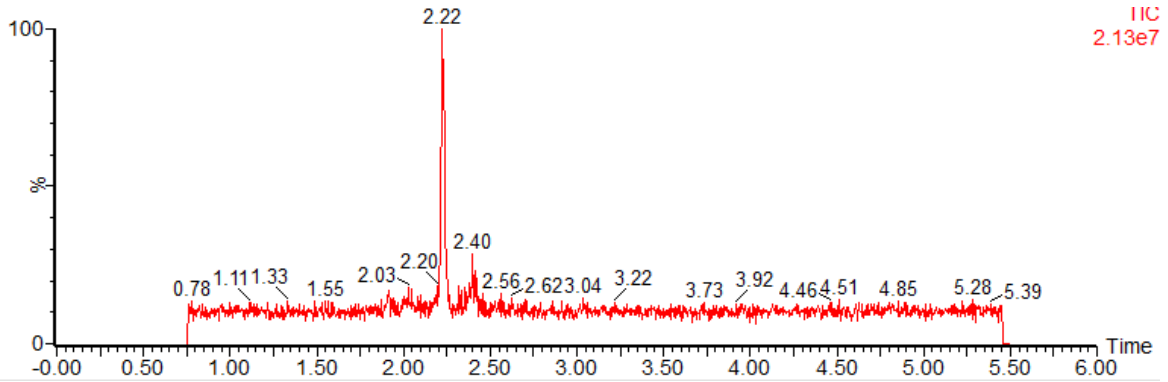

Deconvoluted Mass Spectrum RT = 2.21

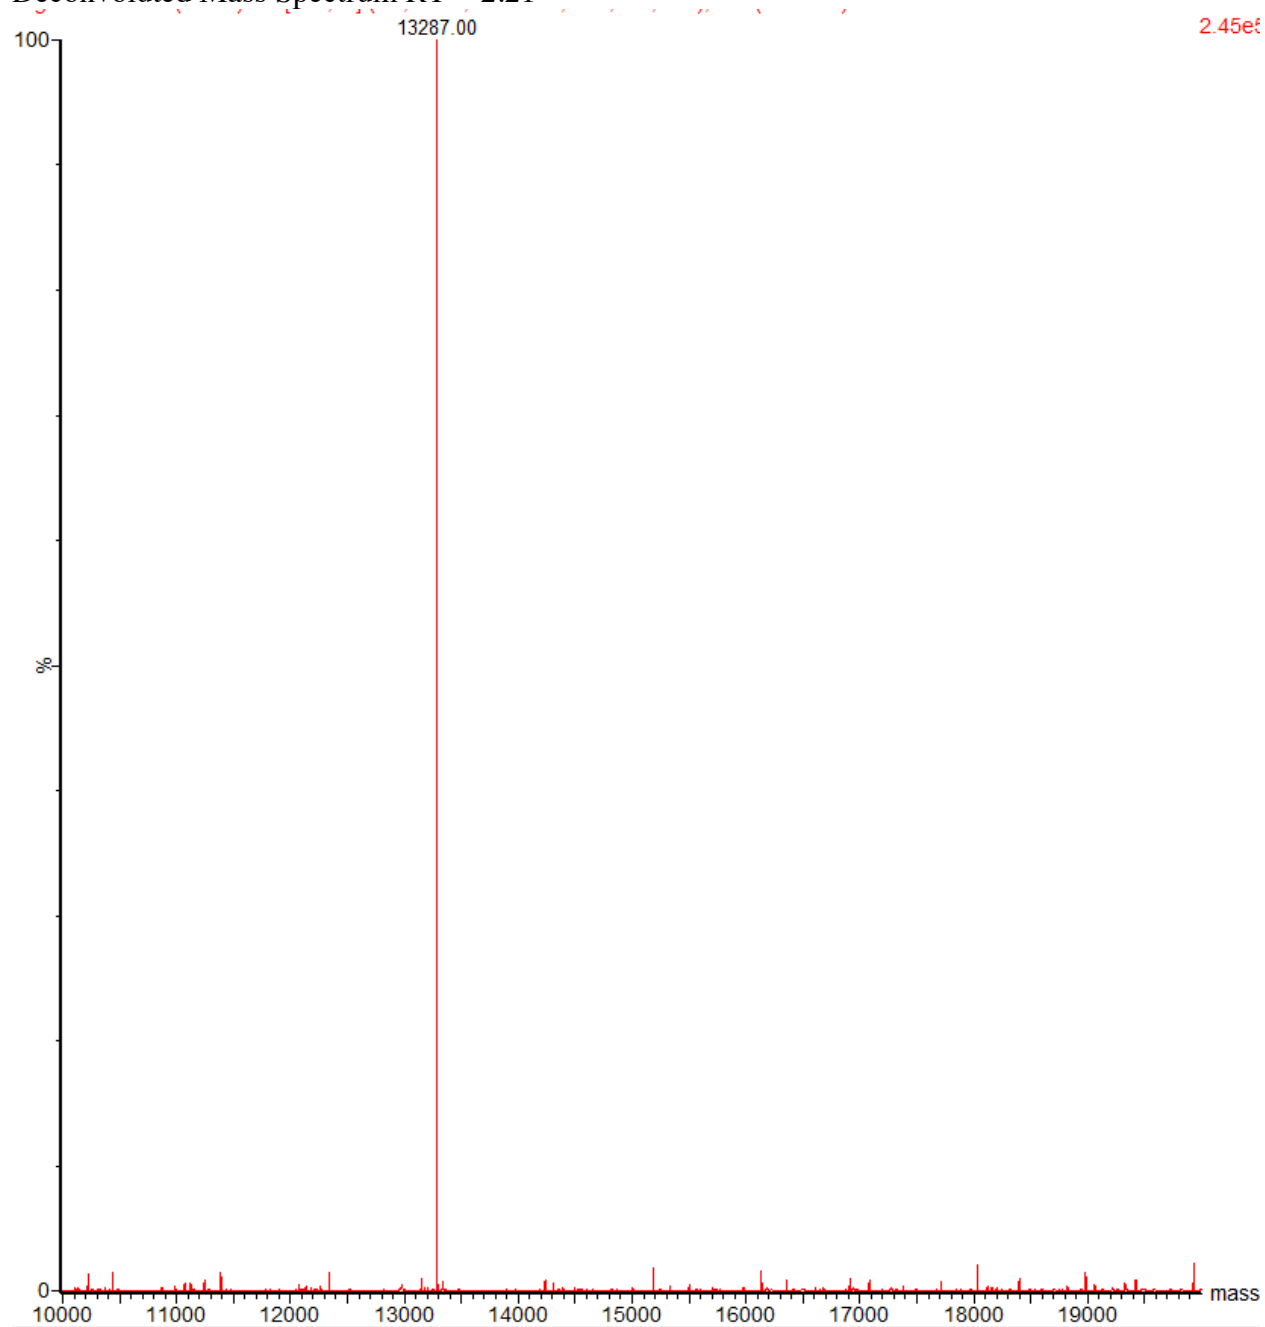

---

## **hNE Inhibition Assay**

### **Protocol**

**R/S-(57)** were used directly in the assay after isolation, without further purification. Activity of human neutrophil elastase (hNE) was measured using the method described previously<sup>2</sup> with slight modifications in a total volume of 10  $\mu$ L in a reaction buffer of PBS (pH 7.4) and 0.05% (v/v) Nonidet<sup>TM</sup> P 40 Substitute (Sigma). Final composition of each reaction was 5 nM hNE (Elastin Products Corp.), 50  $\mu$ M AAPV-aminomethylcoumarin (AMC) substrate (Millipore), and various concentrations of compounds. hNE was incubated with inhibitors for 10 min at room temperature before addition of AAPV-AMC. Residual proteolytic activity was measured kinetically at 25 °C using a Synergy H1 microplate reader (BioTek) for a total of 30 min at 30 sec intervals (Excitation: 380 nm, Emission: 460 nm). Only data points reflecting linear substrate conversion were used to determine relative protease activity. IC<sub>50</sub> values were obtained by fitting the data to a concentration-response inhibition, log (inhibitor) vs. response – variable slope (four parameters) using GraphPad Prism.

The same protocols were used to elicit the ability for small molecule electrophiles to inhibit hNe. All of the small molecules below proved inactive.

---

**Raw Data**Raw data for **R-(57)**

| Log [M]  | R-(55)  |         |         |
|----------|---------|---------|---------|
| -6       | 0.08443 | 0.09821 | 0.1046  |
| -6.30103 | 0.08173 | 0.09096 | 0.09701 |
| -6.60206 | 0.1038  | 0.1246  | 0.1173  |
| -6.90309 | 0.09301 | 0.1166  | 0.1337  |
| -7.20412 | 0.1193  | 0.144   | 0.1471  |
| -7.50515 | 0.1201  | 0.1623  | 0.1527  |
| -7.80618 | 0.1355  | 0.1876  | 0.1953  |
| -8.10721 | 0.1741  | 0.2032  | 0.2049  |
| -8.40824 | 0.2159  | 0.2269  | 0.2179  |
| -8.70927 | 0.2347  | 0.2387  | 0.2242  |
| -9.0103  | 0.2237  | 0.248   | 0.2462  |

Raw Data for **S-(57)**

| Log [M] | S-(55) |        |        |
|---------|--------|--------|--------|
| -6      | 0.1285 | 0.1268 | 0.1318 |
| -6.301  | 0.1127 | 0.1152 | 0.1286 |
| -6.6021 | 0.13   | 0.1229 | 0.1433 |
| -6.9031 | 0.1256 | 0.1381 | 0.1447 |
| -7.2041 | 0.1514 | 0.1531 | 0.1821 |
| -7.5052 | 0.177  | 0.1934 | 0.2086 |
| -7.8062 | 0.2347 | 0.2358 | 0.2644 |
| -8.1072 | 0.253  | 0.2727 | 0.298  |
| -8.4082 | 0.3032 | 0.3237 | 0.3083 |
| -8.7093 | 0.3229 | 0.3286 | 0.3441 |
| -9.0103 | 0.3415 | 0.3645 | 0.3692 |

Raw Data for **56**

| Log [M] | 54     |        |        |
|---------|--------|--------|--------|
| -6      | 0.1285 | 0.1268 | 0.1318 |
| -6.301  | 0.1127 | 0.1152 | 0.1286 |
| -6.6021 | 0.13   | 0.1229 | 0.1433 |
| -6.9031 | 0.1256 | 0.1381 | 0.1447 |
| -7.2041 | 0.1514 | 0.1531 | 0.1821 |
| -7.5052 | 0.177  | 0.1934 | 0.2086 |
| -7.8062 | 0.2347 | 0.2358 | 0.2644 |
| -8.1072 | 0.253  | 0.2727 | 0.298  |
| -8.4082 | 0.3032 | 0.3237 | 0.3083 |
| -8.7093 | 0.3229 | 0.3286 | 0.3441 |
| -9.0103 | 0.3415 | 0.3645 | 0.3692 |

---

---

**Plotted Data**

**Plotted Data for R-(57)**

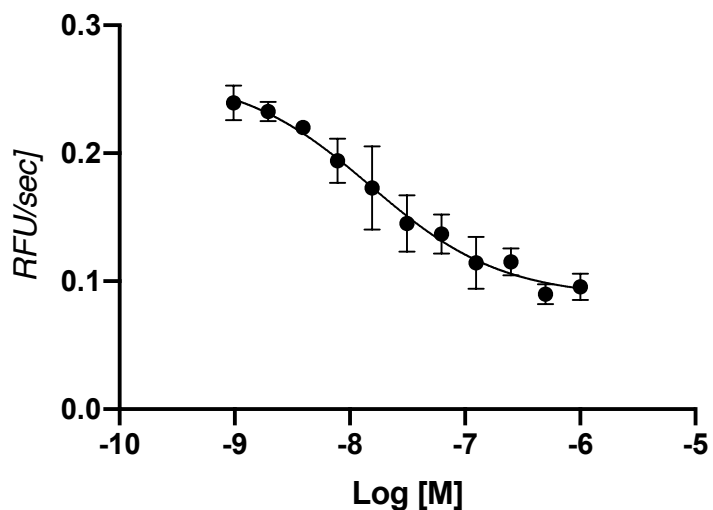

**Non Linear Fit Parameters**

|                             |                          |
|-----------------------------|--------------------------|
| Best-fit values             |                          |
| Bottom                      | 0.08754                  |
| Top                         | 0.2613                   |
| LogIC50                     | -7.820                   |
| HillSlope                   | -0.7621                  |
| IC50                        | 1.513e-008               |
| Span                        | 0.1737                   |
| 95% CI (profile likelihood) |                          |
| Bottom                      | 0.002397 to 0.1062       |
| Top                         | 0.2324 to 0.5491         |
| LogIC50                     | -9.462 to -7.536         |
| HillSlope                   | -1.303 to -0.2260        |
| IC50                        | 3.451e-010 to 2.912e-008 |
| Goodness of Fit             |                          |
| Degrees of Freedom          | 29                       |
| R squared                   | 0.9290                   |
| Sum of Squares              | 0.006909                 |
| Sy.x                        | 0.01543                  |

Plotted Data for S-(57)

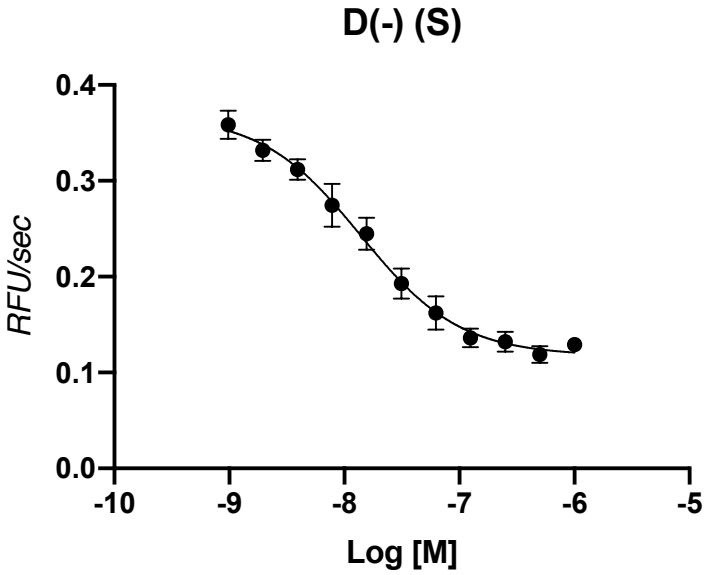

**Non-Linear Fit Parameters**

|                                    |                          |
|------------------------------------|--------------------------|
| <b>Best-fit values</b>             |                          |
| Bottom                             | 0.1175                   |
| Top                                | 0.3686                   |
| LogIC50                            | -7.858                   |
| HillSlope                          | -1.005                   |
| IC50                               | 1.386e-008               |
| Span                               | 0.2510                   |
| <b>95% CI (profile likelihood)</b> |                          |
| Bottom                             | 0.1021 to 0.1292         |
| Top                                | 0.3464 to 0.4059         |
| LogIC50                            | -8.016 to -7.742         |
| HillSlope                          | -1.305 to -0.7440        |
| IC50                               | 9.635e-009 to 1.811e-008 |
| <b>Goodness of Fit</b>             |                          |
| Degrees of Freedom                 | 29                       |
| R squared                          | 0.9793                   |
| Sum of Squares                     | 0.005105                 |
| Sy.x                               | 0.01327                  |

**Plotted Data for 56**

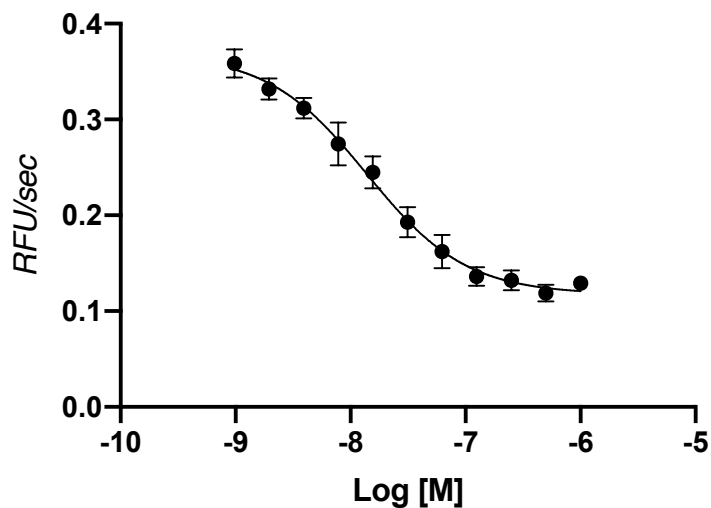

**Nonlinear Fit Parameters**

|                                    |                          |
|------------------------------------|--------------------------|
| <b>Best-fit values</b>             |                          |
| Bottom                             | 0.1175                   |
| Top                                | 0.3686                   |
| LogIC50                            | -7.858                   |
| HillSlope                          | -1.005                   |
| IC50                               | 1.386e-008               |
| Span                               | 0.2510                   |
| <b>95% CI (profile likelihood)</b> |                          |
| Bottom                             | 0.1021 to 0.1292         |
| Top                                | 0.3464 to 0.4059         |
| LogIC50                            | -8.016 to -7.742         |
| HillSlope                          | -1.305 to -0.7440        |
| IC50                               | 9.635e-009 to 1.811e-008 |
| <b>Goodness of Fit</b>             |                          |
| Degrees of Freedom                 | 29                       |
| R squared                          | 0.9793                   |
| Sum of Squares                     | 0.005105                 |
| Sy.x                               | 0.01327                  |

---

## Small Molecule Electrophiles

The same protocols were used to elicit the ability for small molecule electrophiles to inhibit hNe. All of the small molecules below proved inactive.

PhO (+/-)

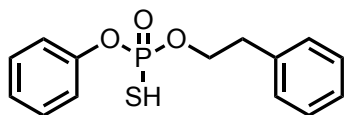

Exact Mass: 294.05  
Molecular Weight: 294.30

Azt (+/-)

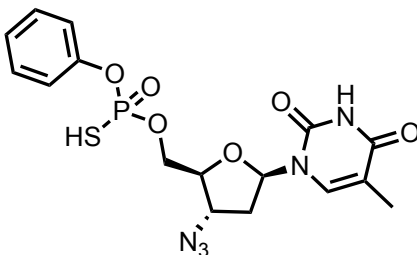

Exact Mass: 439.07  
Molecular Weight: 439.38

## Small molecules

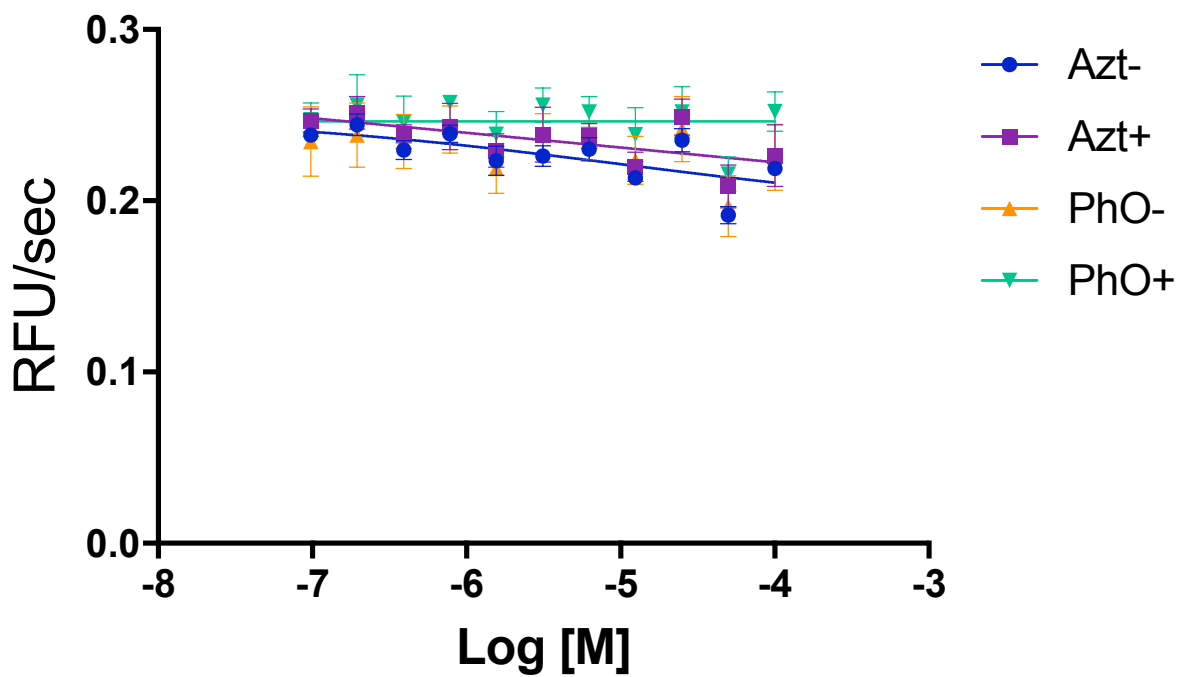



# SENDER on Biosynthetically Derived DNA

## Construction of 58

### PCR Amplification:

To a PCR tube template strand (**SI-18**) (2  $\mu$ L, 5 ng from 2 ng/ $\mu$ L stock), primer 1 (**SI-19**) (2.5  $\mu$ L from a 10  $\mu$ M stock), primer 2 (**SI-20**) (2.5  $\mu$ L from a 10  $\mu$ M stock), water (18  $\mu$ L) were added on ice. To this mixture Q5<sup>®</sup> High Fidelity 2x Master Mix (NEB) was added (25  $\mu$ L). Tubes were placed into a preheated (95°C) thermocycler. An initial denaturing step of 95 °C for 30 was performed. This was followed by 30 rounds standard PCR protocol, with a denaturing step at 95 °C for 10 seconds, an annealing step at 59 °C for 15 seconds and an elongation step at 72 °C for 20 minute. A final extension step was performed at 752 °C for 2 minutes. The PCR products were purified by ZymoSpin Oligo Clean and Concentrator and eluted in 50  $\mu$ L and carried forward.

### Template Strand: **SI-18**

/5Phos/atagtggtccagatgaccaaattggctactaccgaagagctaccggacgagttcgtgggtggtgacggcaaaatgaaagagctcagccccagatggtacttctattacc  
gccccagatggtacttctattacctaggaactggccccagaagcttcacttccctacggcgctaacaagaaggcatcgatgggttgcaact  
gaggagccttgaatacacccaaa

### Primer 1: **SI-19**

/5Phos/ aaccatac gatgccttctttgt

### Primer 2: **SI-20**

ctactaccgaagagctaccggac

### PCR Map

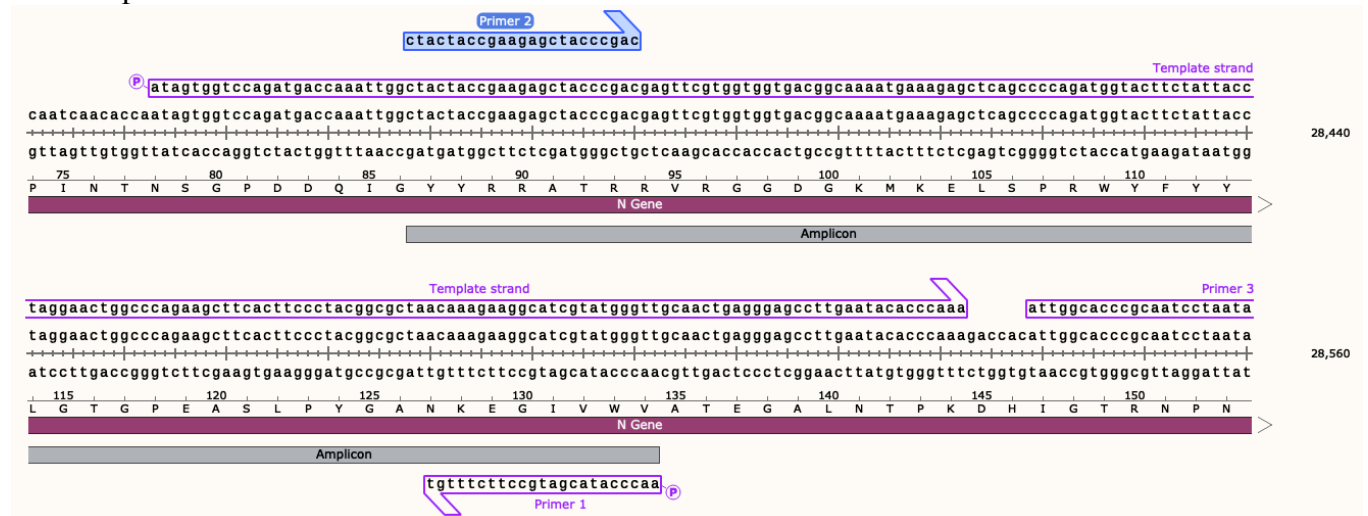

## Analysis of Amplicons

### 5' Phosphorylated Amplicon

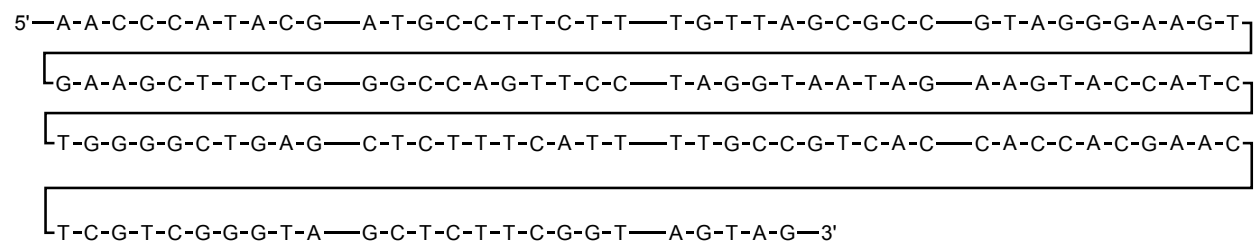

### HPLC

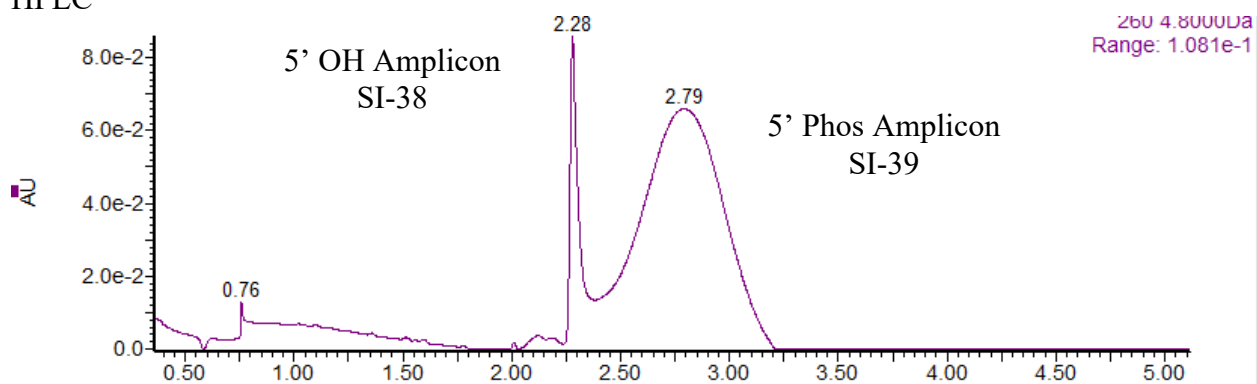

Deconvoluted Mass Spectrum RT=2.28 min

5' OH Amplicon SI-38

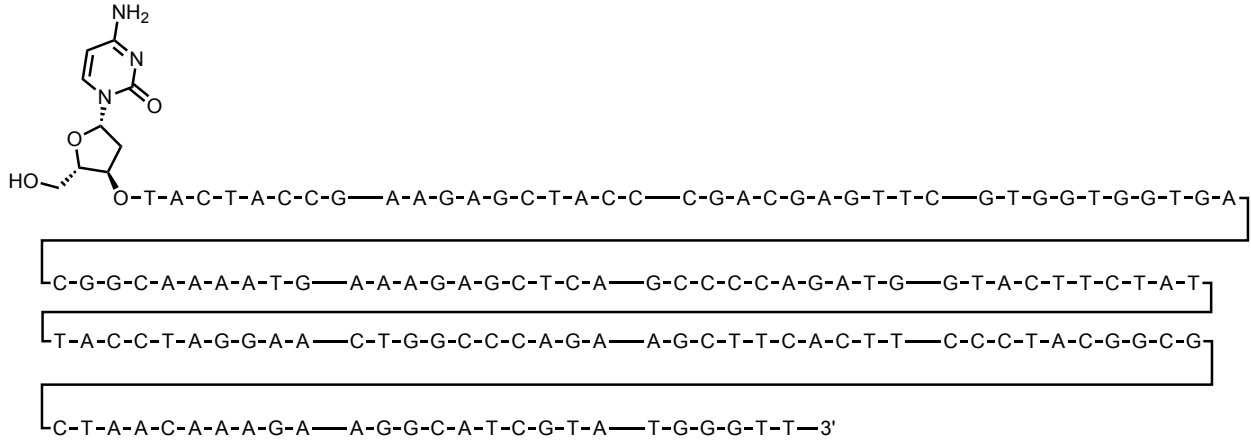

Molecular Weight: 44761.98

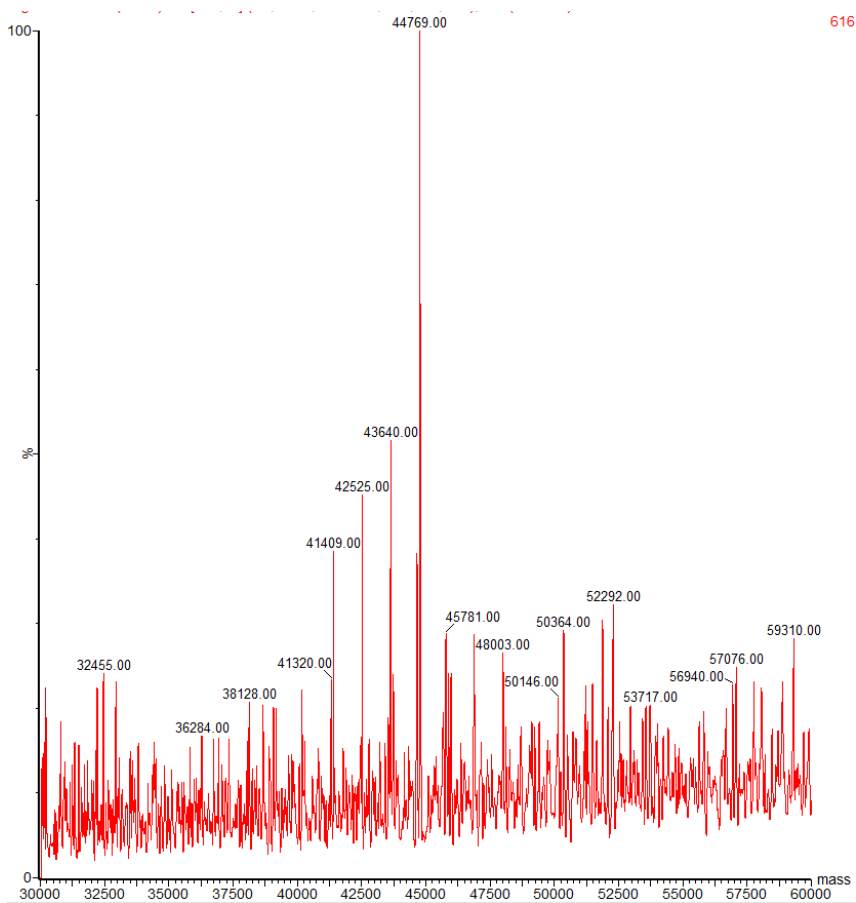

---

Deconvoluted Mass Spectrum RT=2.79 min

5' Phosphorylated Amplicon **SI-39**

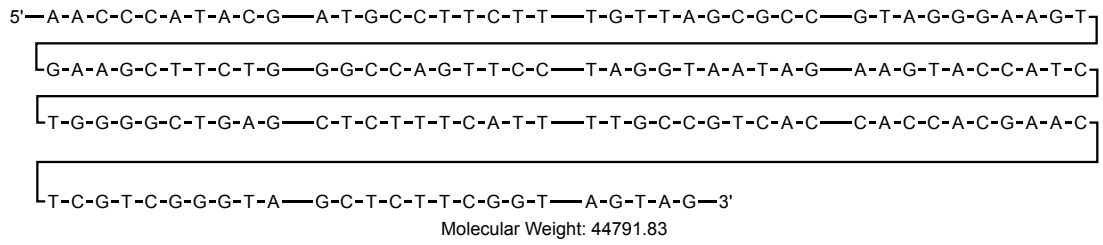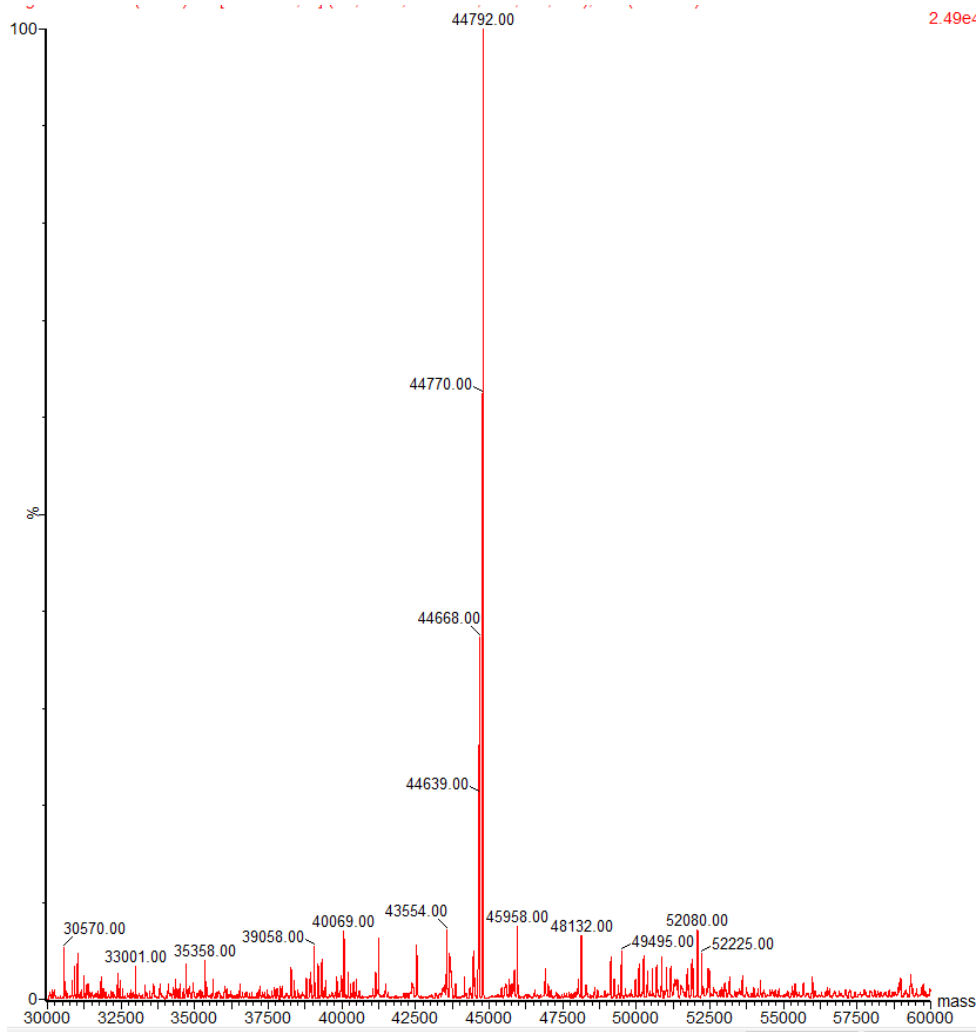

---

### Lambda Exonuclease Degradation:

To the DNA mixture from the previous step (40  $\mu\text{L}$ ), CutSmart® (5  $\mu\text{L}$ , 10x), water (3  $\mu\text{L}$ ), and Lambda Exonuclease (2  $\mu\text{L}$ ) was added in a PCR tube. This mixture was vortexed and incubated at 37°C for 30 minutes at which point the lambda exonuclease was thermally denatured at 75°C for 10 minutes. The resulting ssDNA (not phosphorylated) was isolated using a ZymoSpin Oligo clean and concentrator column.

Analysis of Lambda Exonuclease Digestion:

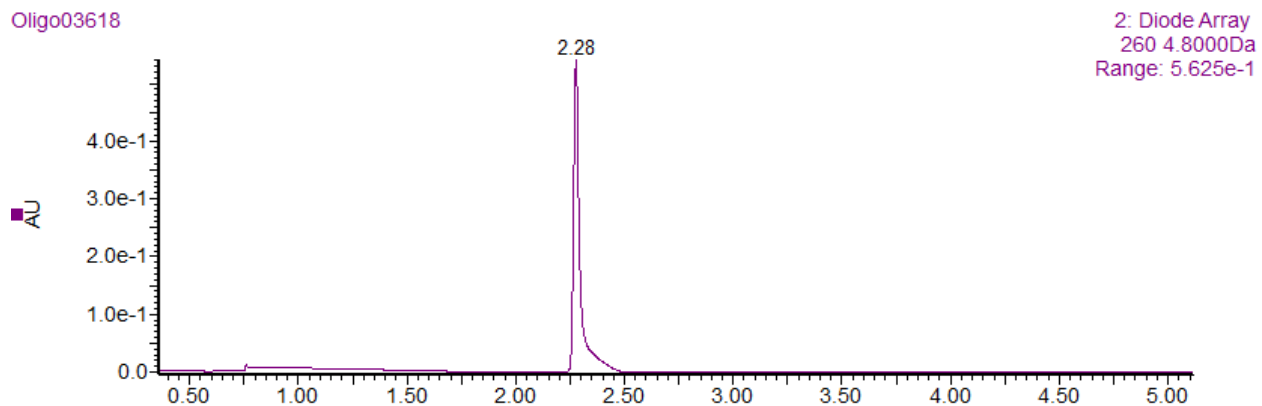

Remaining ssDNA SI-38

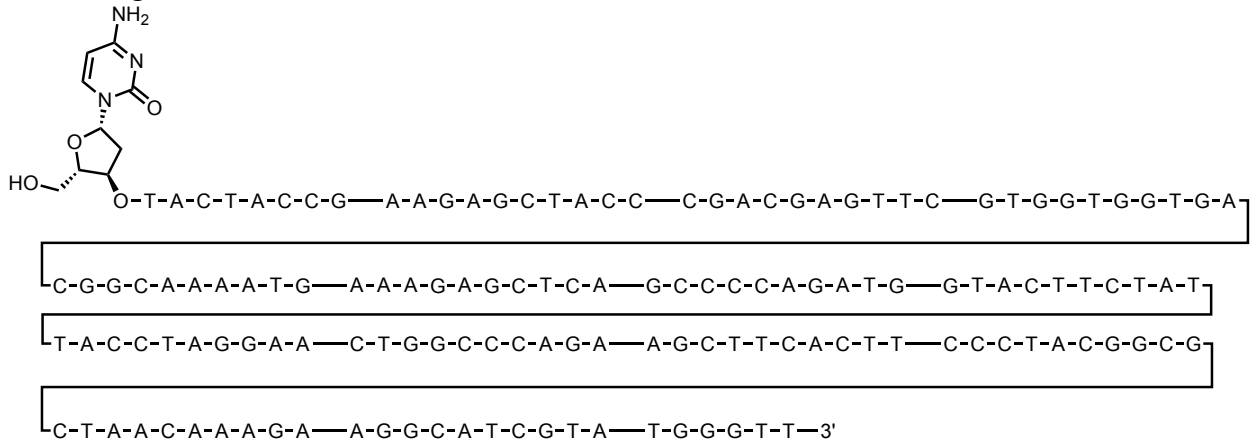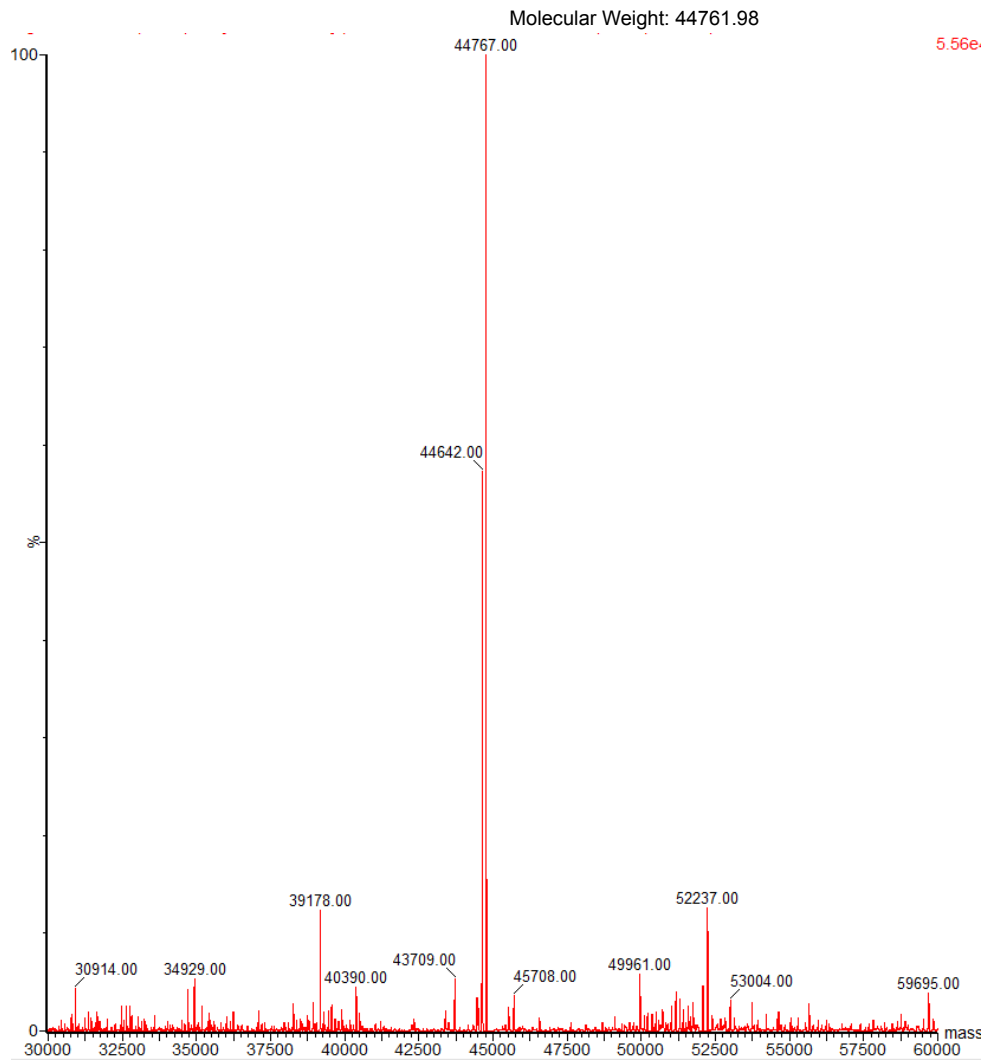

---

### T4PNK Phosphorylation:

To the DNA mixture from the previous step (30  $\mu\text{L}$ ), CutSmart® (5  $\mu\text{L}$ , 10x), DTT (5  $\mu\text{L}$ , 50 mM Stock), ATP (5  $\mu\text{L}$  from 10 mM stock), water (3  $\mu\text{L}$ ) and T4PNK (2  $\mu\text{L}$ ) was added in a PCR tube. This mixture was vortexed and incubated at 37°C for 60 minutes at which point the T4PNK was thermally denatured at 75°C for 10 minutes. The resulting ssDNA **58** was isolated using a ZymoSpin Oligo clean and concentrator column.

### Analysis of T4PNK Phosphorylation **58**:

Oligo03619

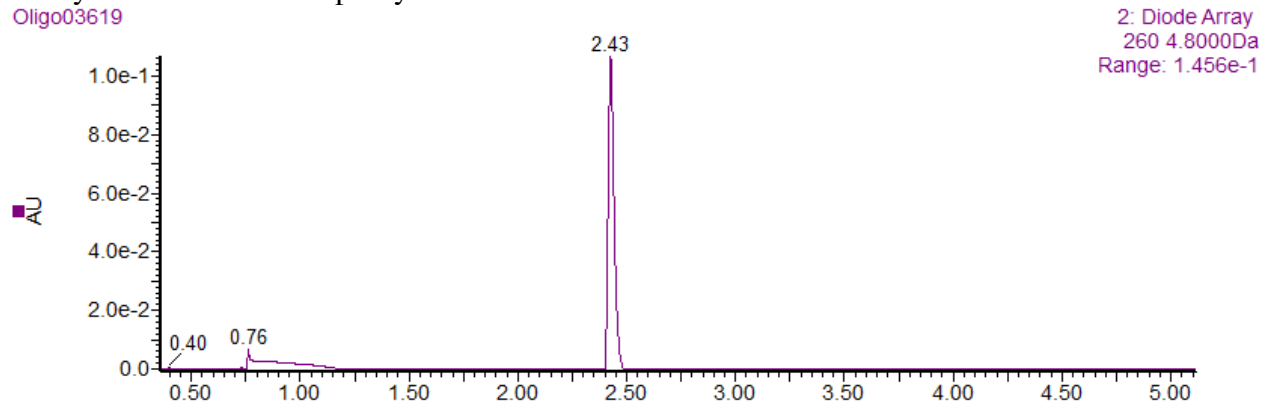

---

---

## DNA 58

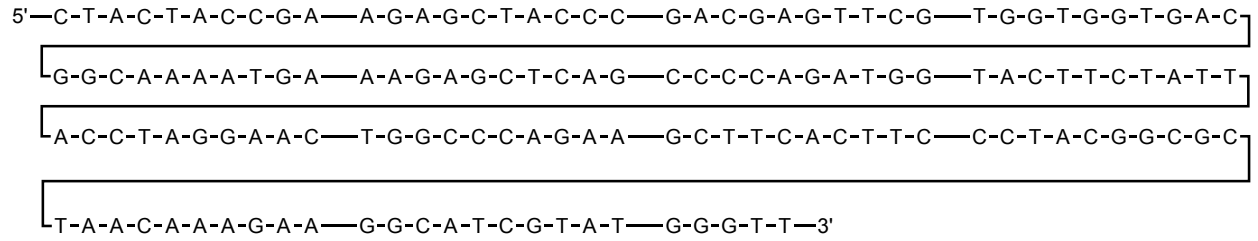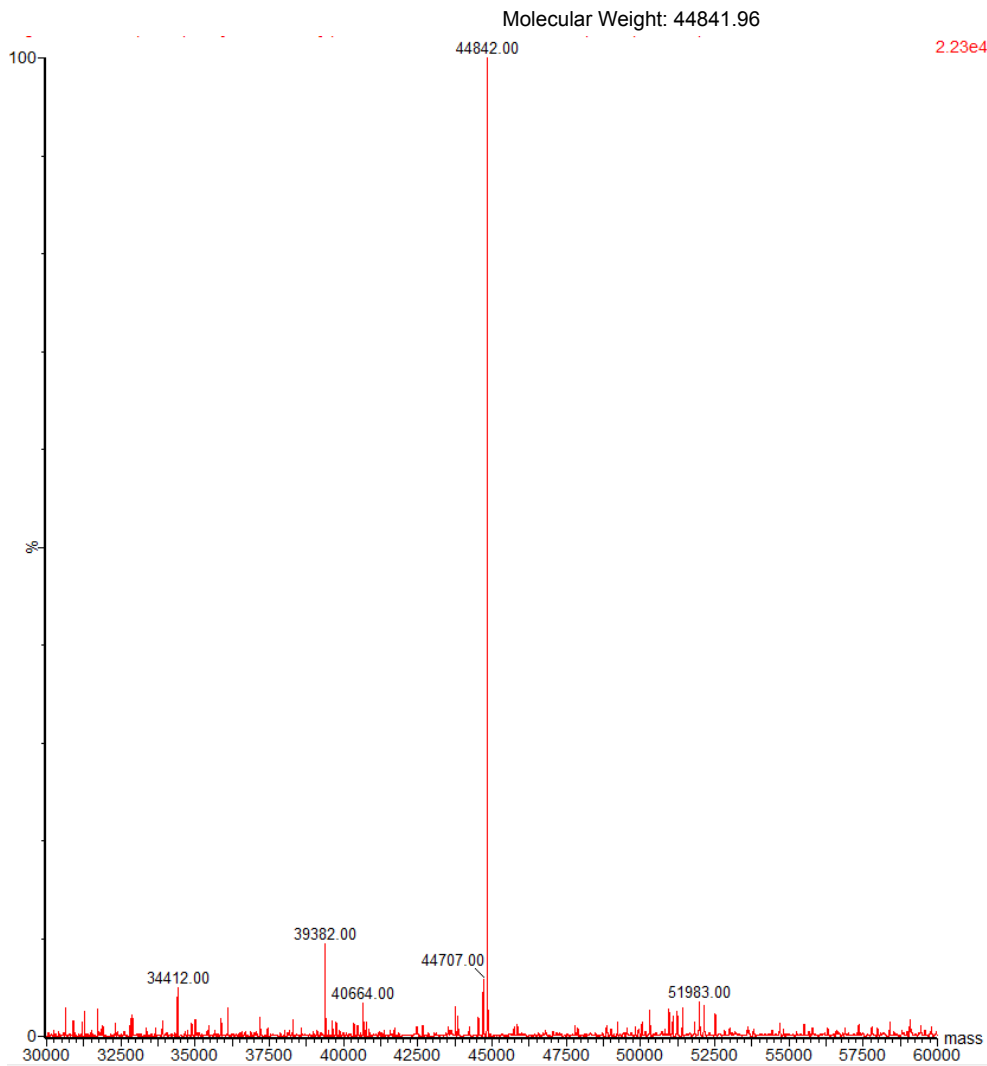



---

### Analysis of PCR and Enzymatic Modifications by DNA Gel:

Without purification, 1  $\mu\text{L}$  of each DNA sample was added to 4  $\mu\text{L}$  water and 1  $\mu\text{L}$  Gel Loading Dye, Purple (6X), no SDS. Ladder was Thermofisher O'RangeRuler 10 bp DNA Ladder. Then, 5  $\mu\text{L}$  of each sample was loaded onto a 5% agarose gel, which had been freshly cast with 7.5 g UltraPure Agarose, 150 mL 1X TAE buffer and 15  $\mu\text{L}$  10,000X SYBR<sup>TM</sup> Safe DNA Gel Stain. The gel was run in 1X TAE buffer at 150 V for 30 minutes.

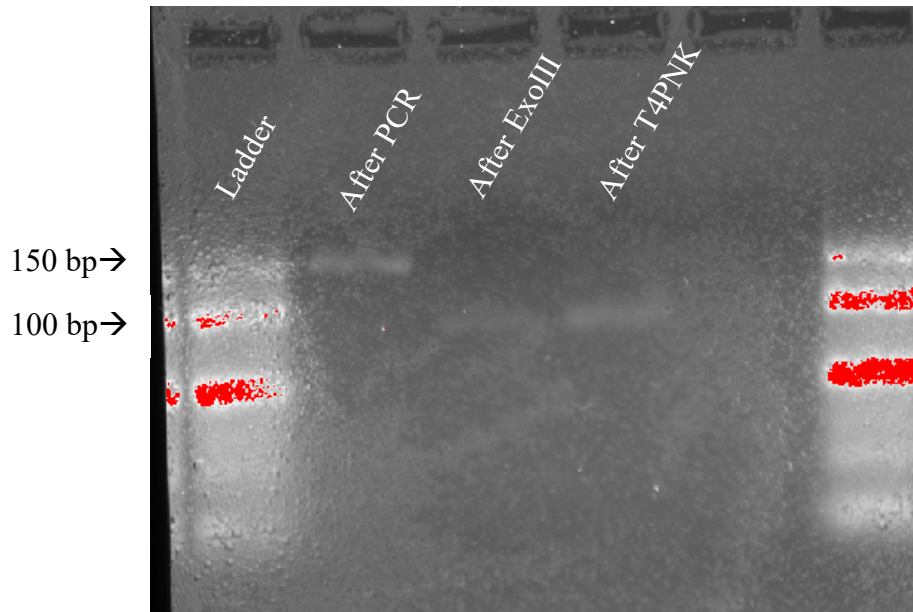

**SENDR: 58→59**

DNA **58** was used in SENDR Protocol without variation.

Analysis of **59**:

Produced from **58** by General Procedure **2**:

Using  $\Psi$ -7

Yield (A260): 54%

Expected Mass: 45222.23

Found Deconvoluted Mass: 45224.00

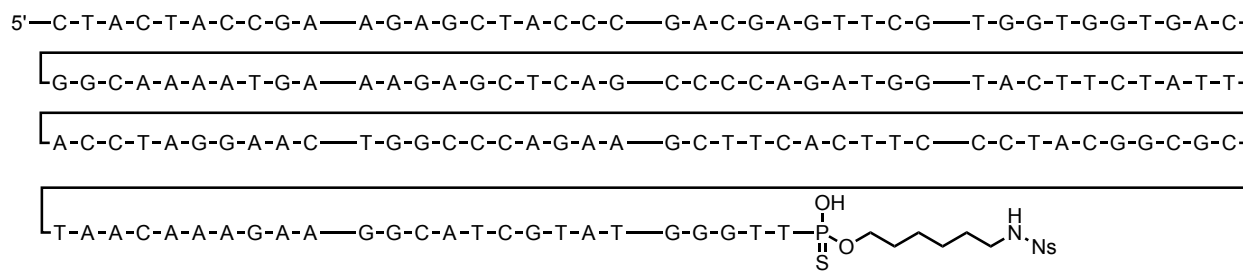

Molecular Weight: 45222.33

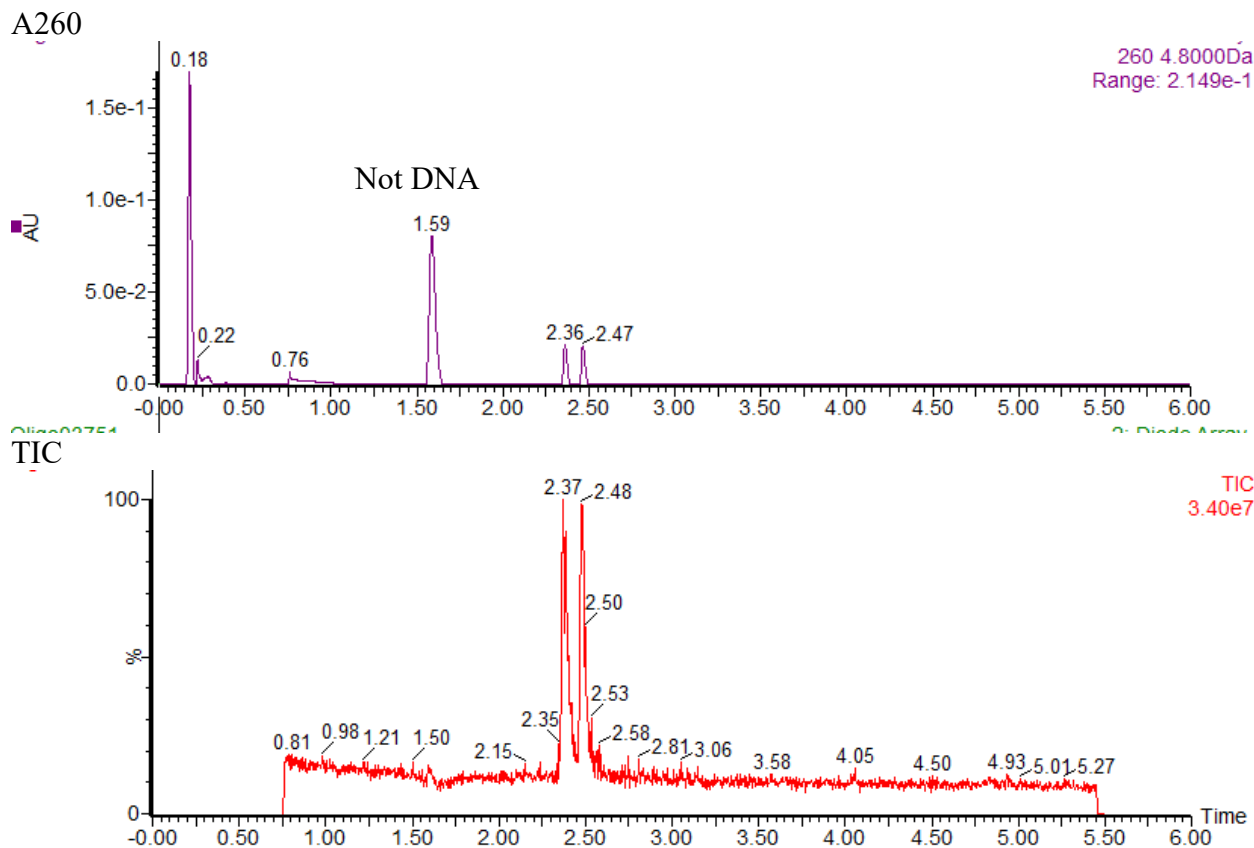

---

Deconvoluted Mass Spectrum RT=2.48

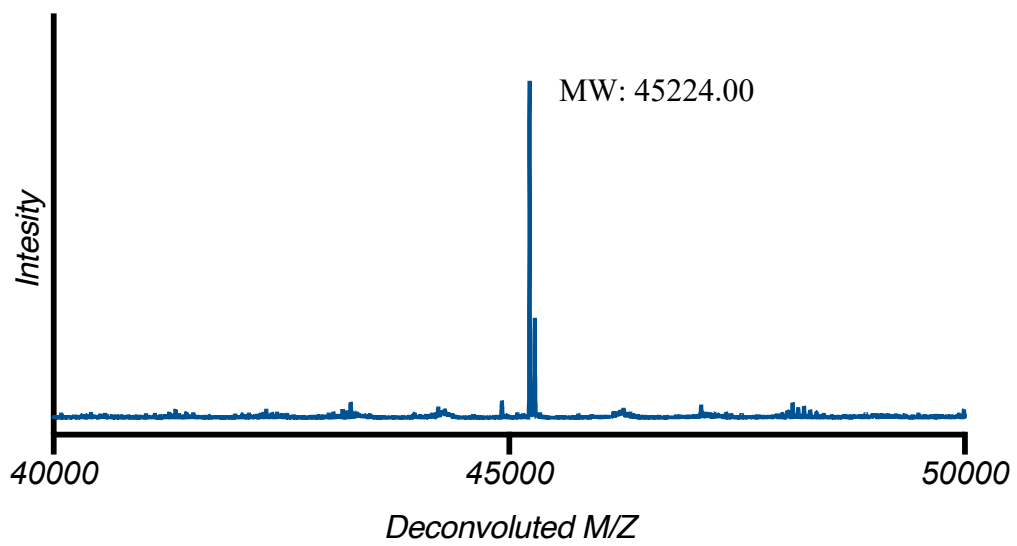

---

## DNA BSA Conjugation

### Procedure for the creation of **61**

DNA **61** was synthesized using *General Procedure 2*. Briefly, 100 nmol of DNA **60** was loaded onto two tubes each containing 100  $\mu\text{L}$  of equilibrated resin. This loaded resin was washed with DMA (500  $\mu\text{L}$  twice) and dry THF (500  $\mu\text{L}$  three times) and dried under vacuum. These tubes were manipulated in parallel.

**$\Psi$ -8** in MeCN (150 mM, 250  $\mu\text{L}$ ) was added to the loaded and dried resin. Then DBU (450 mM, 18  $\mu\text{L}$ ) was added to the reaction mixture. The reaction tube was vortexed for 30 seconds incubated at 37 °C for 60 minutes. The reactions were worked up by aspirating and discarding the reaction solution, and washing the resin bed with MeCN (500  $\mu\text{L}$ ) and 1:1 MeCN:PBS (500  $\mu\text{L}$ ). Elute buffer (300  $\mu\text{L}$ ) was added to the resin bed and the tube was agitated by orbital shaker for 5-10 minutes. The DNA containing elution buffer was collected. DNA was isolate *via* ethanol precipitation. Ethanol precipitation was performed by adding 10% v/v of a NaCl solution (30  $\mu\text{L}$ , 5M) to the elute buffer and three volumes of cold ethanol (-20°C) were added to the tube (~1000 $\mu\text{L}$ ) and incubated for 18 hours at -20 °C. The tube was then centrifuged at 13,000 rpm for 15 minutes to pellet the DNA, and the extra ethanol was decanted off. The tubes were dried *via* speed vacuum and the DNA was dissolved and HPLC-MS analysis was performed.

## LCMS Characterization of 61

Produced from **60** by General Procedure **2**:

Using **Ψ-8**

Conversion (A260): 48%

Expected Mass: 7192.88

Expected (M-6)/6 Ion: 1197.81

Found Deconvoluted Mass: 7193.0

Found (M-6)/6 Ion: 1197.74

Total DNA Recovery: 60 nmol (60%)

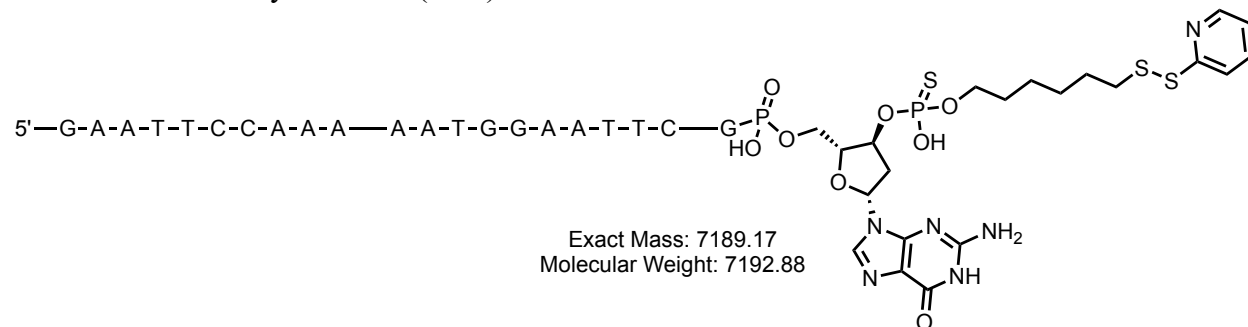

### A260 Chromatogram

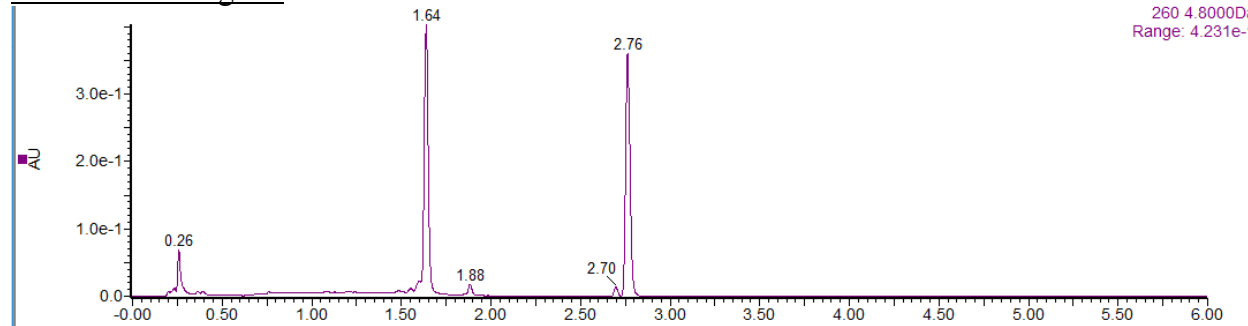

Mass Spectrum (RT= 2.76 min)

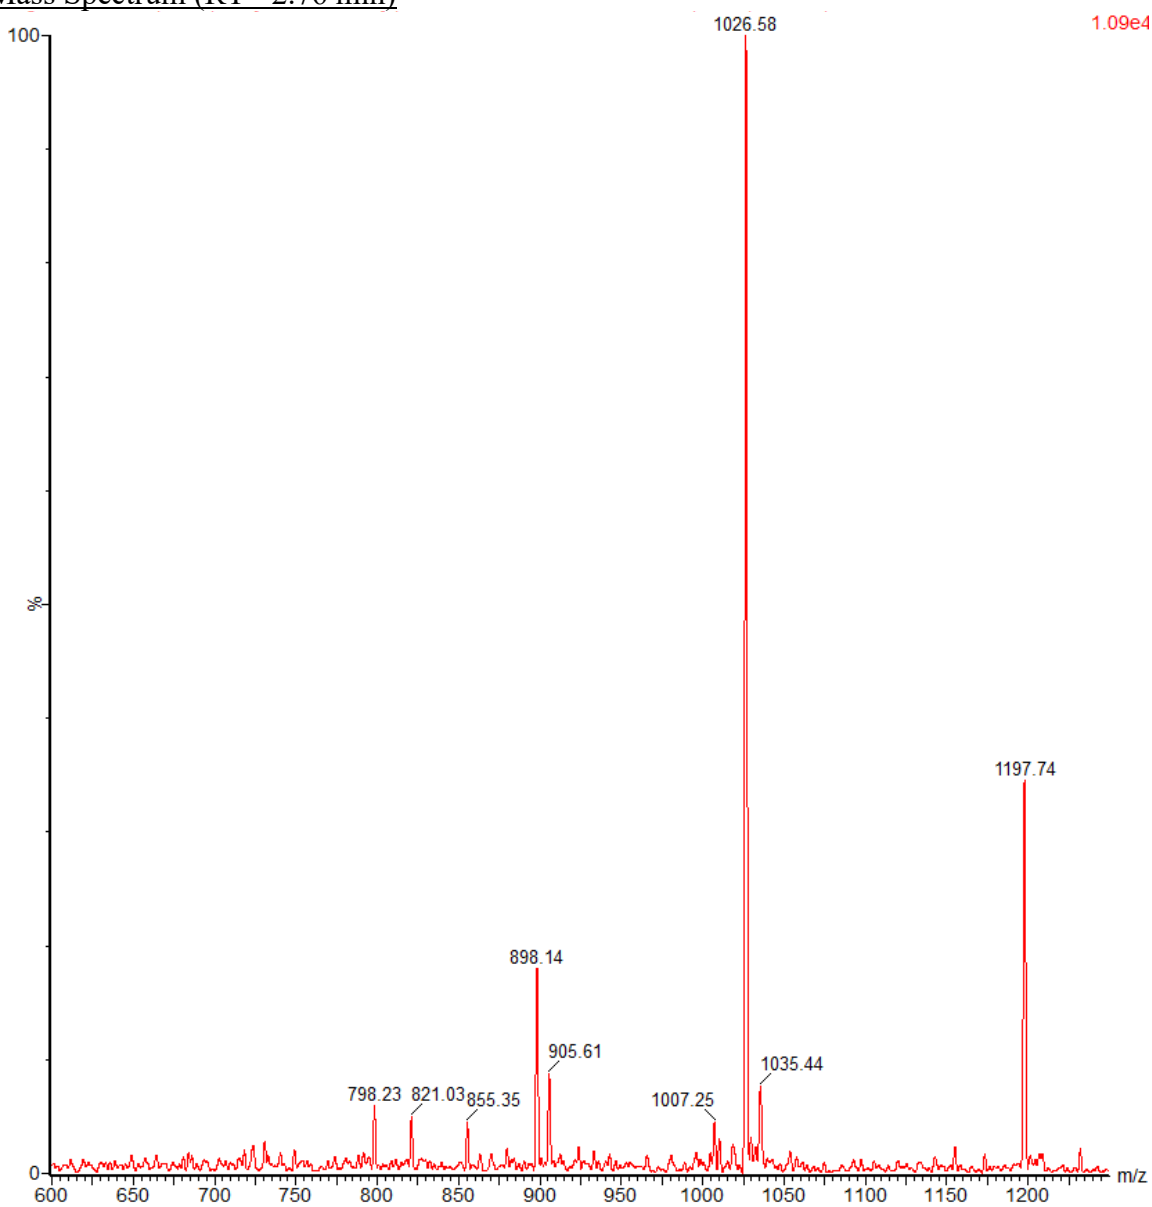

# Deconvoluted Mass Spectrum

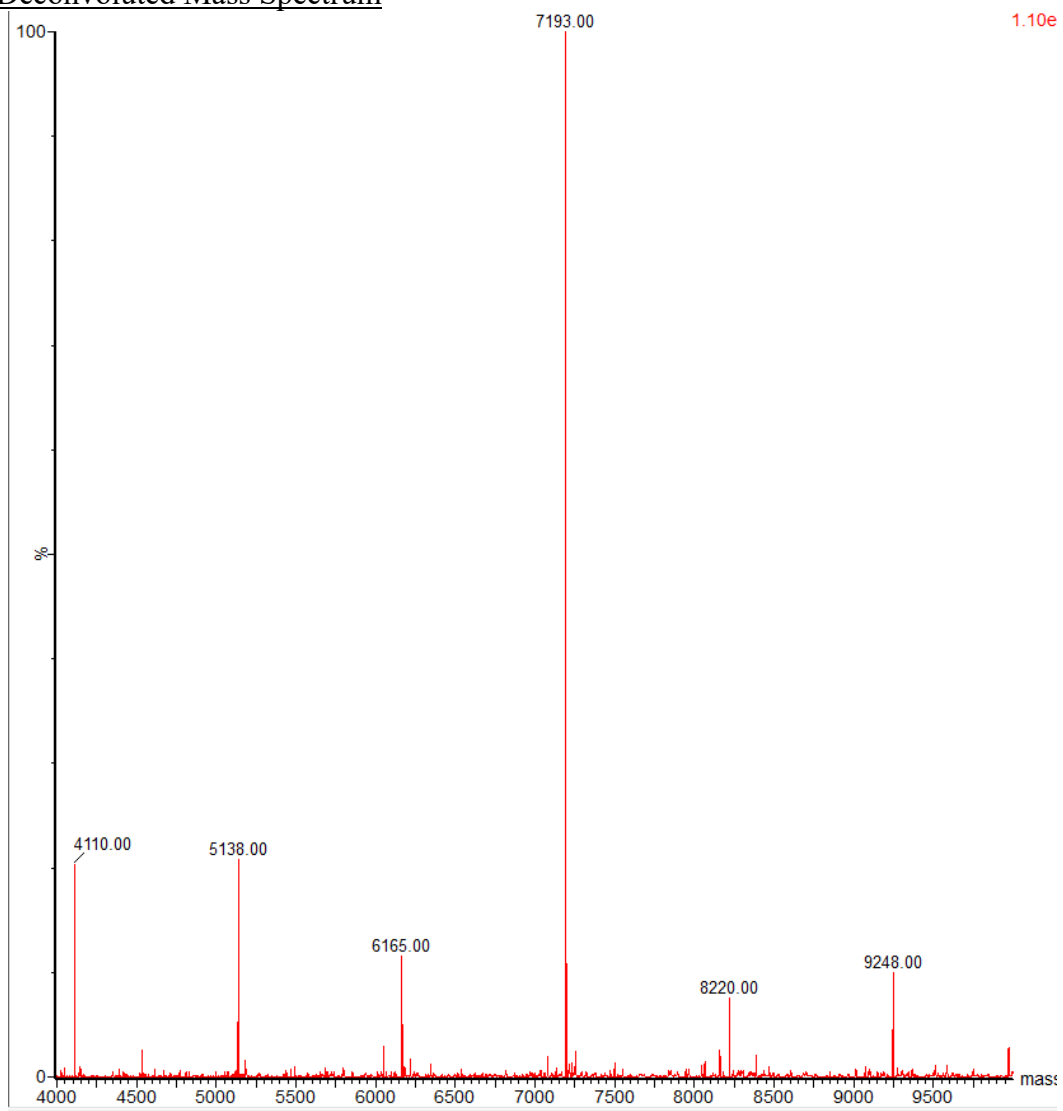

---

### **Procedure for the creation of 62**

Compound **61** was synthesized by *General Procedure 2* and isolated crude after ethanol precipitation. DNA **61** was dissolved to 300  $\mu\text{M}$  in PBS. Solid BSA was dissolved in PBS (2.5 mg/mL,  $\sim 40 \mu\text{M}$ ). these two solutions were combined in a PCR tube (25  $\mu\text{L}$  of each for a reaction volume of 50  $\mu\text{L}$ ) and the resulting reaction mixture was incubated in a thermocycler for 4 hours. The crude ligation solution was diluted to 0.5 mg/mL with respect to BSA and injected for intact protein analysis. Deconvolution across the entire mass peak showed no detectible unmodified BSA remaining.



## Analysis of 62

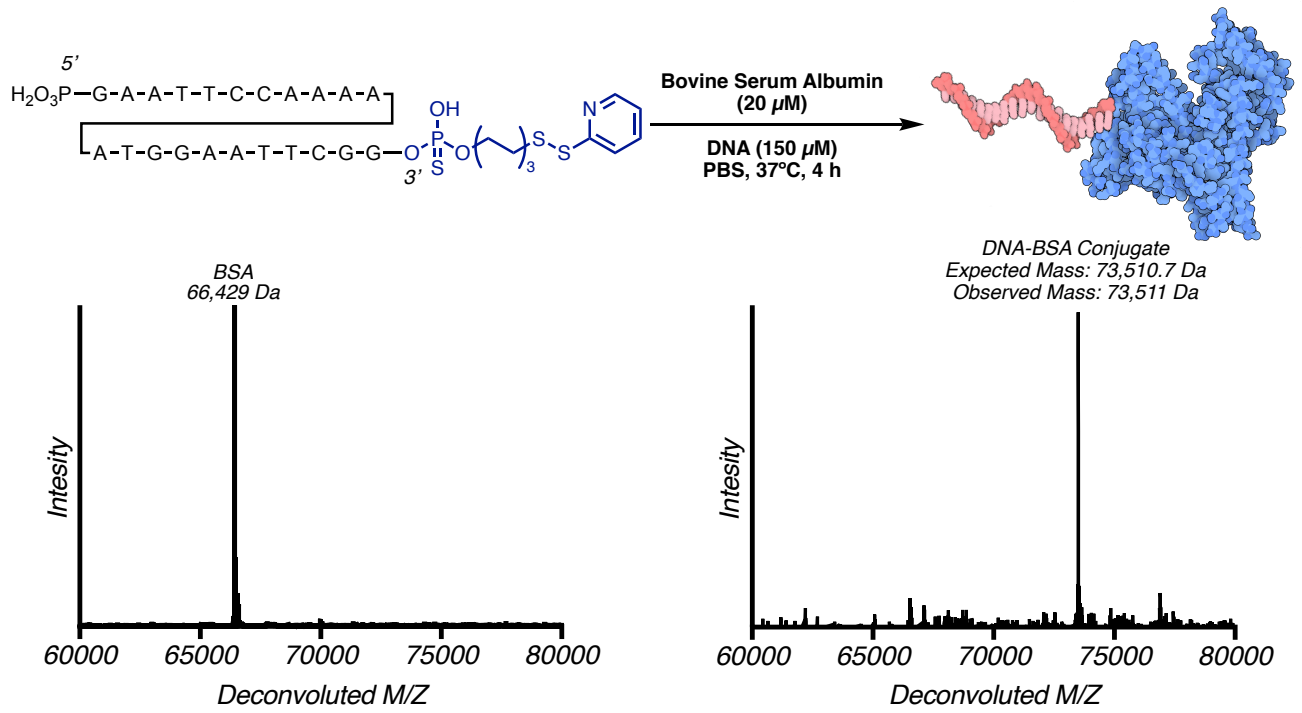

---

## DNA DVD Conjugation

### Procedure for the creation of SI-40

DNA **SI-40** was synthesized using *General Procedure 2*. Briefly, 100 nmol of DNA **63** was loaded onto two tubes containing 100  $\mu\text{L}$  of equilibrated resin. This loaded resin was washed with DMA (500  $\mu\text{L}$  twice) and dry THF (500  $\mu\text{L}$  three times) and dried under vacuum. These tubes were manipulated in parallel.

**$\Psi$ -5** in MeCN (150 mM, 250  $\mu\text{L}$ ) was added to the loaded and dried resin. Then DBU (450 mM, 18  $\mu\text{L}$ ) was added to the reaction mixture. The reaction tube was vortexed for 30 seconds incubated at 37  $^{\circ}\text{C}$  for 60 minutes. The reaction was worked up by aspirating and discarding the reaction solution, and washing the resin bed with MeCN (500  $\mu\text{L}$ ) and 1:1 MeCN:PBS (500  $\mu\text{L}$ ). Elute buffer (300  $\mu\text{L}$ ) was added to the resin bed and the tube was agitated by orbital shaker for 5-10 minutes. The DNA containing elution buffer was collected. DNA was isolate *via* ethanol precipitation. Ethanol precipitation was performed by adding 10% v/v of a NaCl solution (30  $\mu\text{L}$ , 5M) to the elute buffer and three volumes of cold ethanol (-20  $^{\circ}\text{C}$ ) were added to the tube (~1000 $\mu\text{L}$ ) and incubated for 18 hours at -20  $^{\circ}\text{C}$ . The tube was then centrifuged at 13,000 rpm for 15 minutes to pellet the DNA, and the extra ethanol was decanted off. The tubes were dried *via* speed vacuum and the DNA was dissolved and HPLC-MS analysis was performed.

## LCMS Characterization of SI-40

Produced from **63** by General Procedure **2**:

Crude Conversion (A260): 73%

Expected Mass: 6407.2

Expected (M-6)/6 Ion: 1066.34

Found Deconvoluted Mass: 6407.0

Found (M-6)/6 Ion: 1066.5

Crude Isolated Recovery: 44%

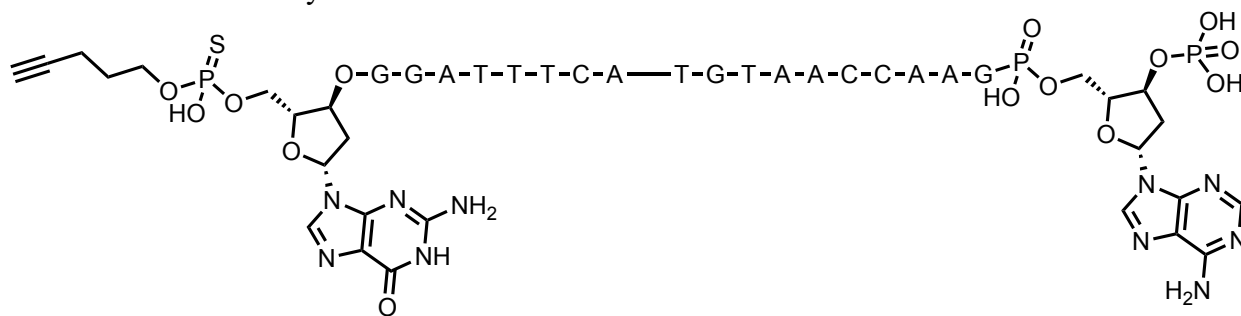

Exact Mass: 6404.04  
Molecular Weight: 6407.20

### A260 Chromatogram

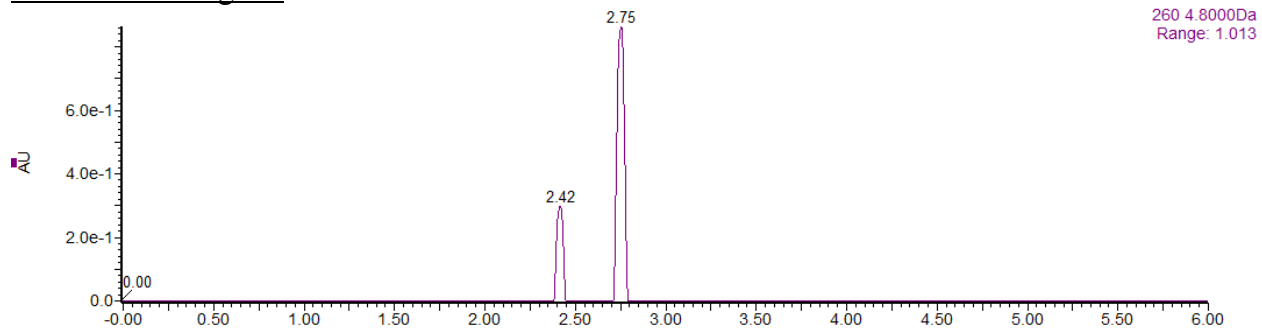

Mass Spectrum (RT= 3.38 min)

1.34e6

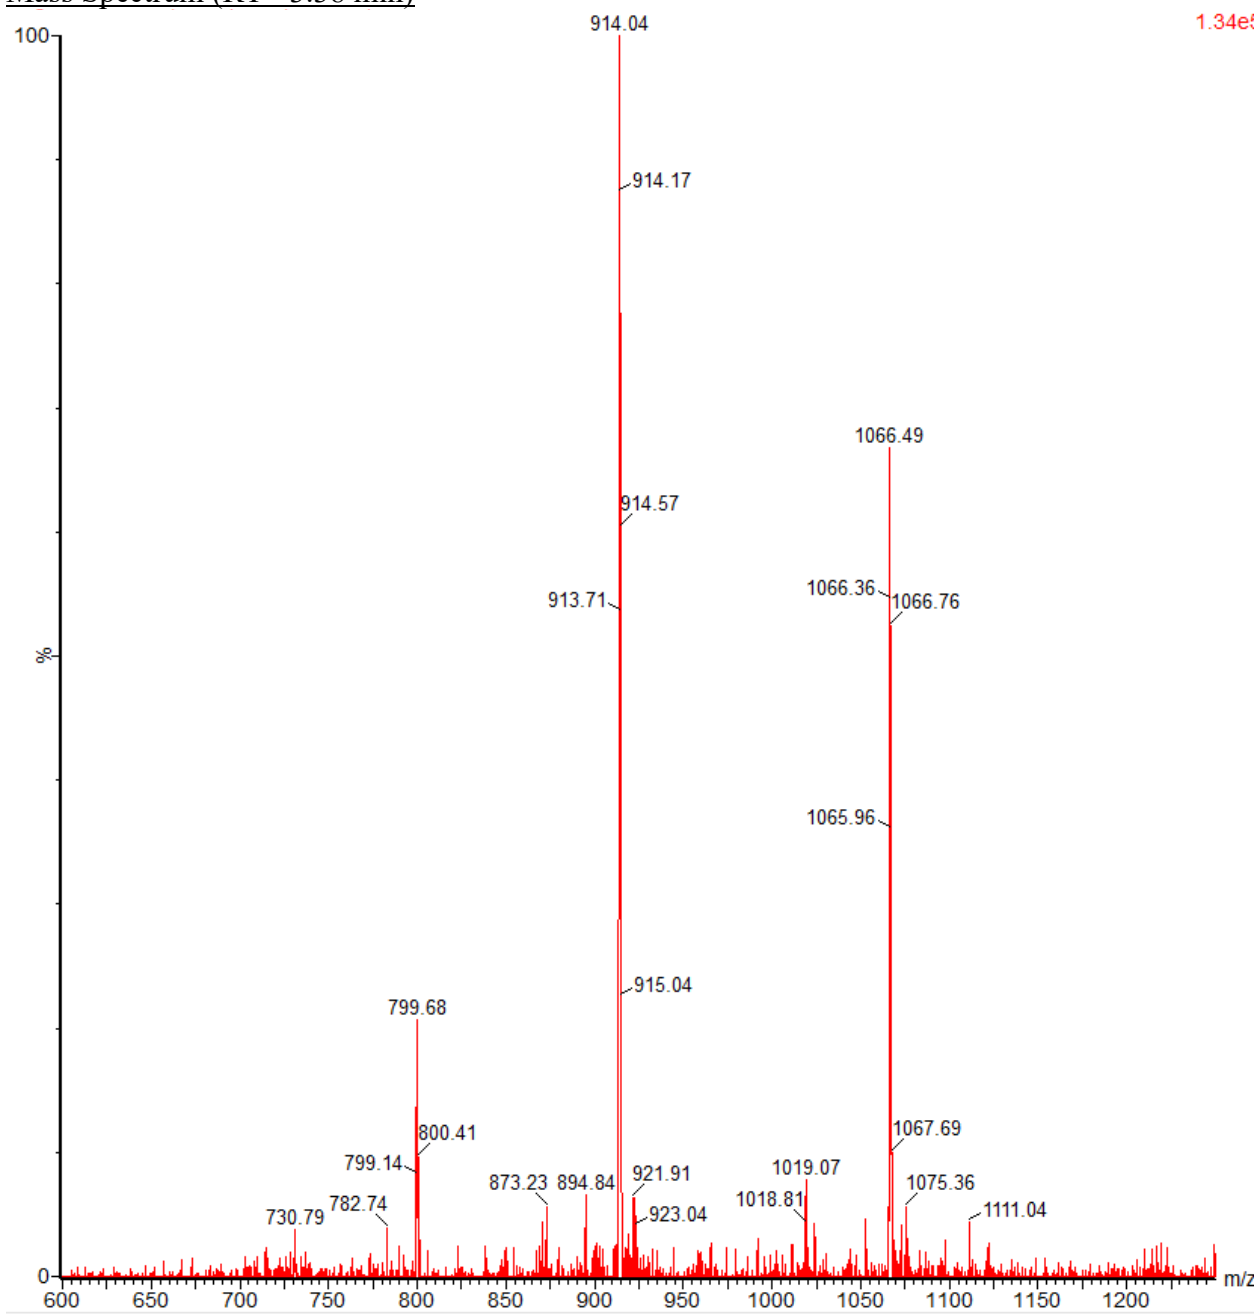

Deconvoluted Mass Spectrum

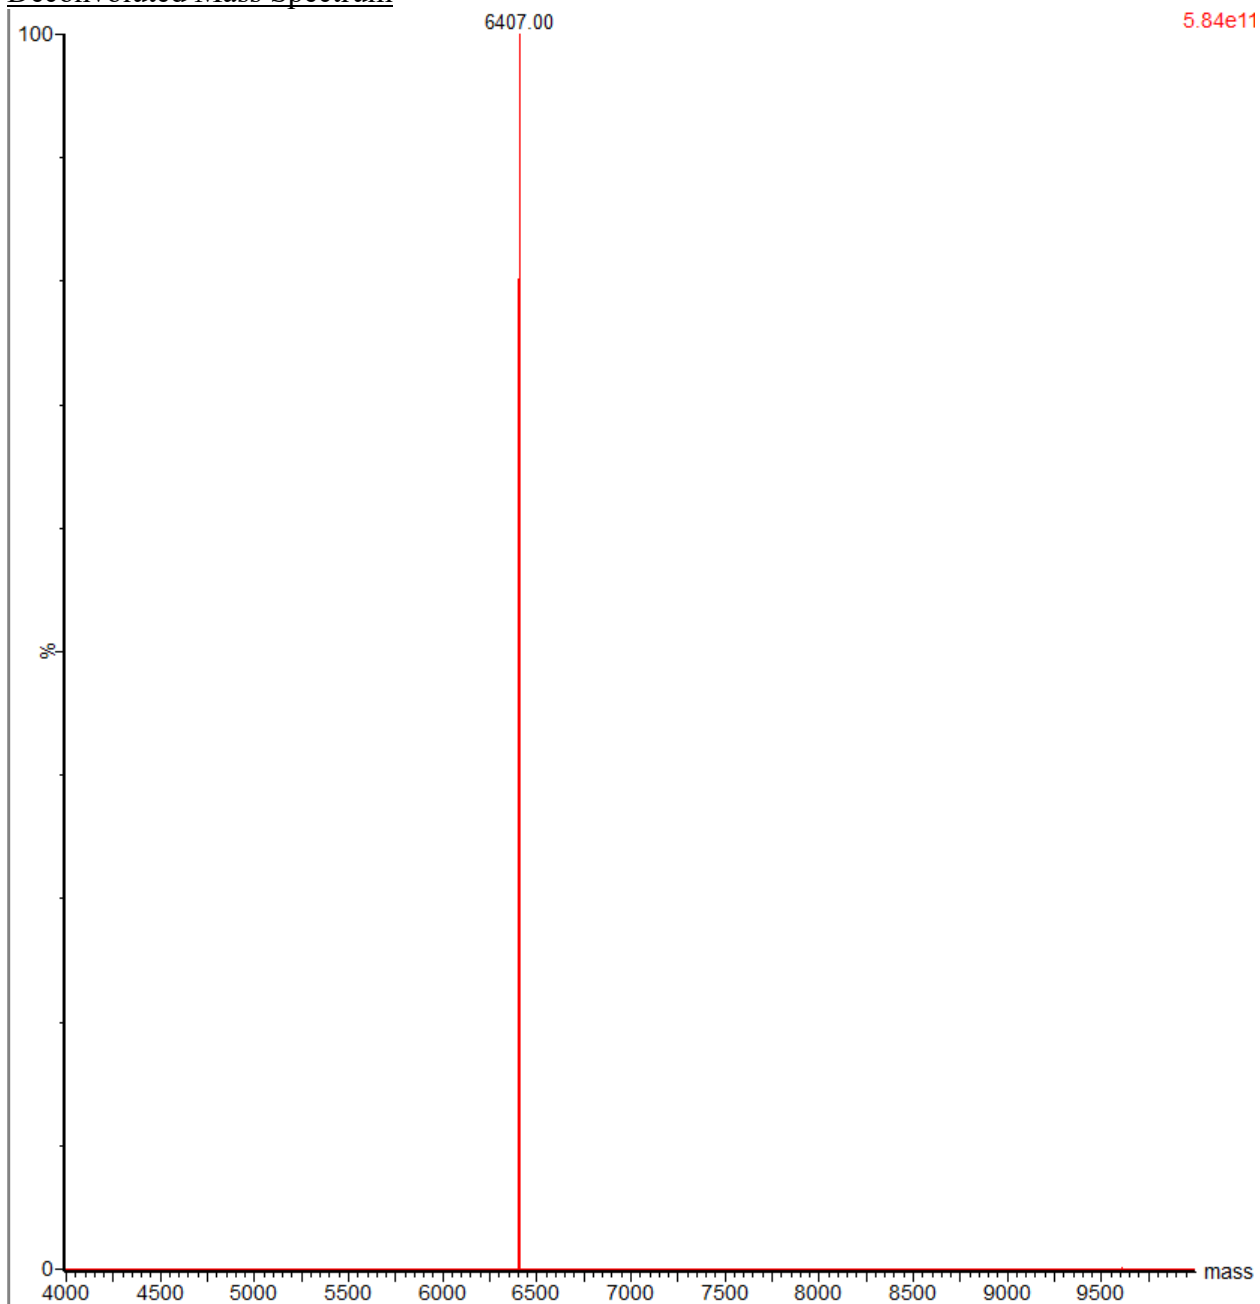

5.84e11

---

---

## Procedure for the creation 64

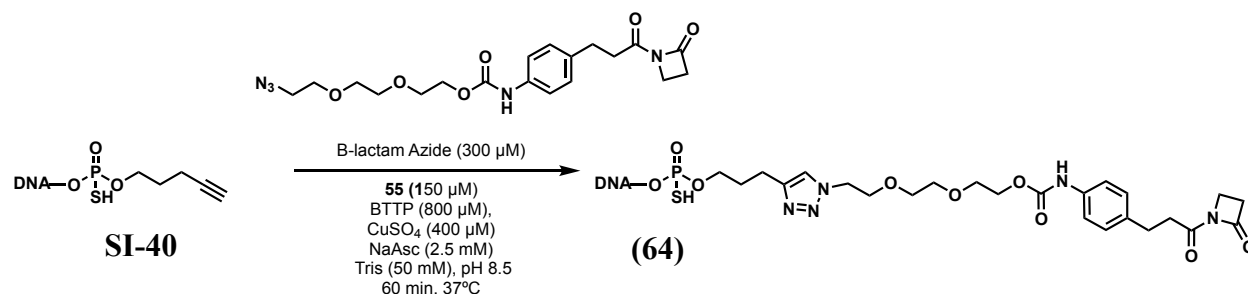

Crude isolated DNA **SI-40** was purified using RP HPLC. After purification 15 nMol (15% total starting material) of pure **SI-40** was obtained. To **SI-40** a CuAAC reaction was performed. Compound **SI-40** (15 nmol) was dissolved (92.5  $\mu\text{L}$ ) in tris buffer (50 mM) at pH 8.5. To this solution the  $\beta$ -lactam azide **SI-53** (2  $\mu\text{L}$ ) was added from stock solution (30 mM) in DMA, (final concentration of 300  $\mu\text{M}$ ). Next, BTTP (2  $\mu\text{L}$ ) was added from a stock solution (40 mM in water). Next,  $\text{CuSO}_4$  (1  $\mu\text{L}$ ) was added from a stock solution (40  $\mu\text{M}$  in water) (a final concentration of 400  $\mu\text{M}$ ). The solution was capped and vortexed. Finally, sodium ascorbate (2.5  $\mu\text{L}$ ) was added from a stock solution (100 mM in water). This reaction solution was vortexed and incubated for 1 hour at 37 °C. DNA **64** was ethanol precipitated, to remove excess small molecules, as previously described. Mass recovery and conversion for this transformation was assumed to be quantitative for subsequent protein conjugation.



Mass Spectrum (RT= 3.26 min)

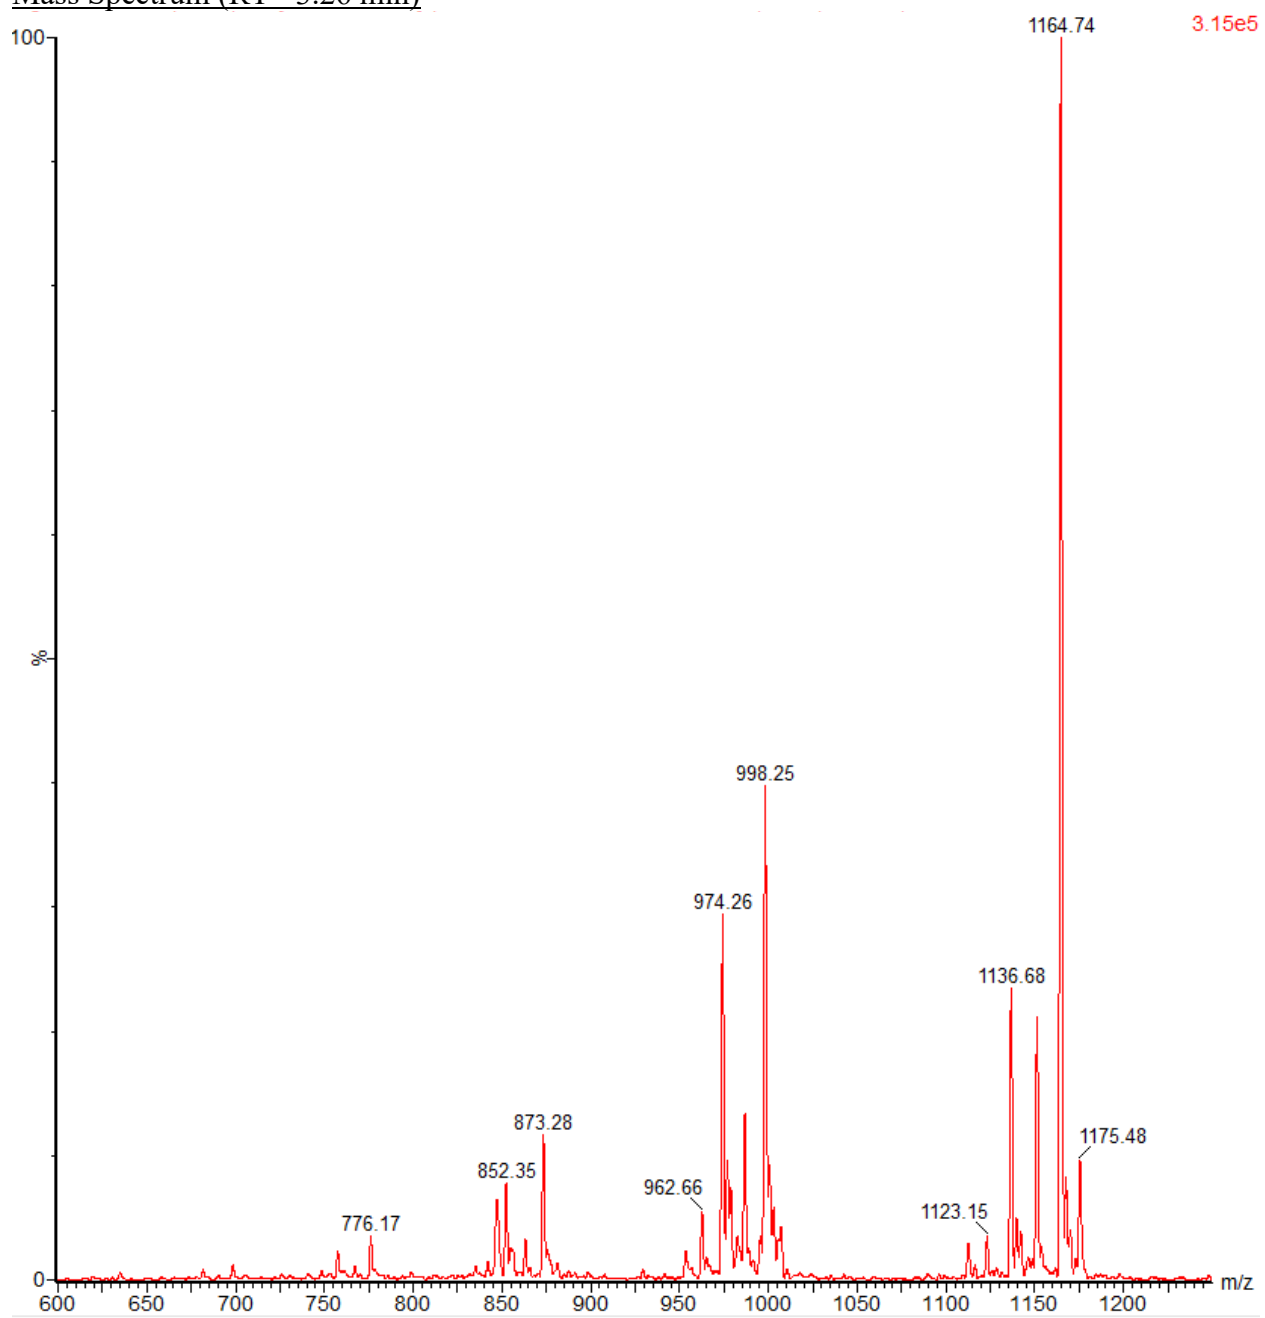



# Deconvoluted Mass Spectrum

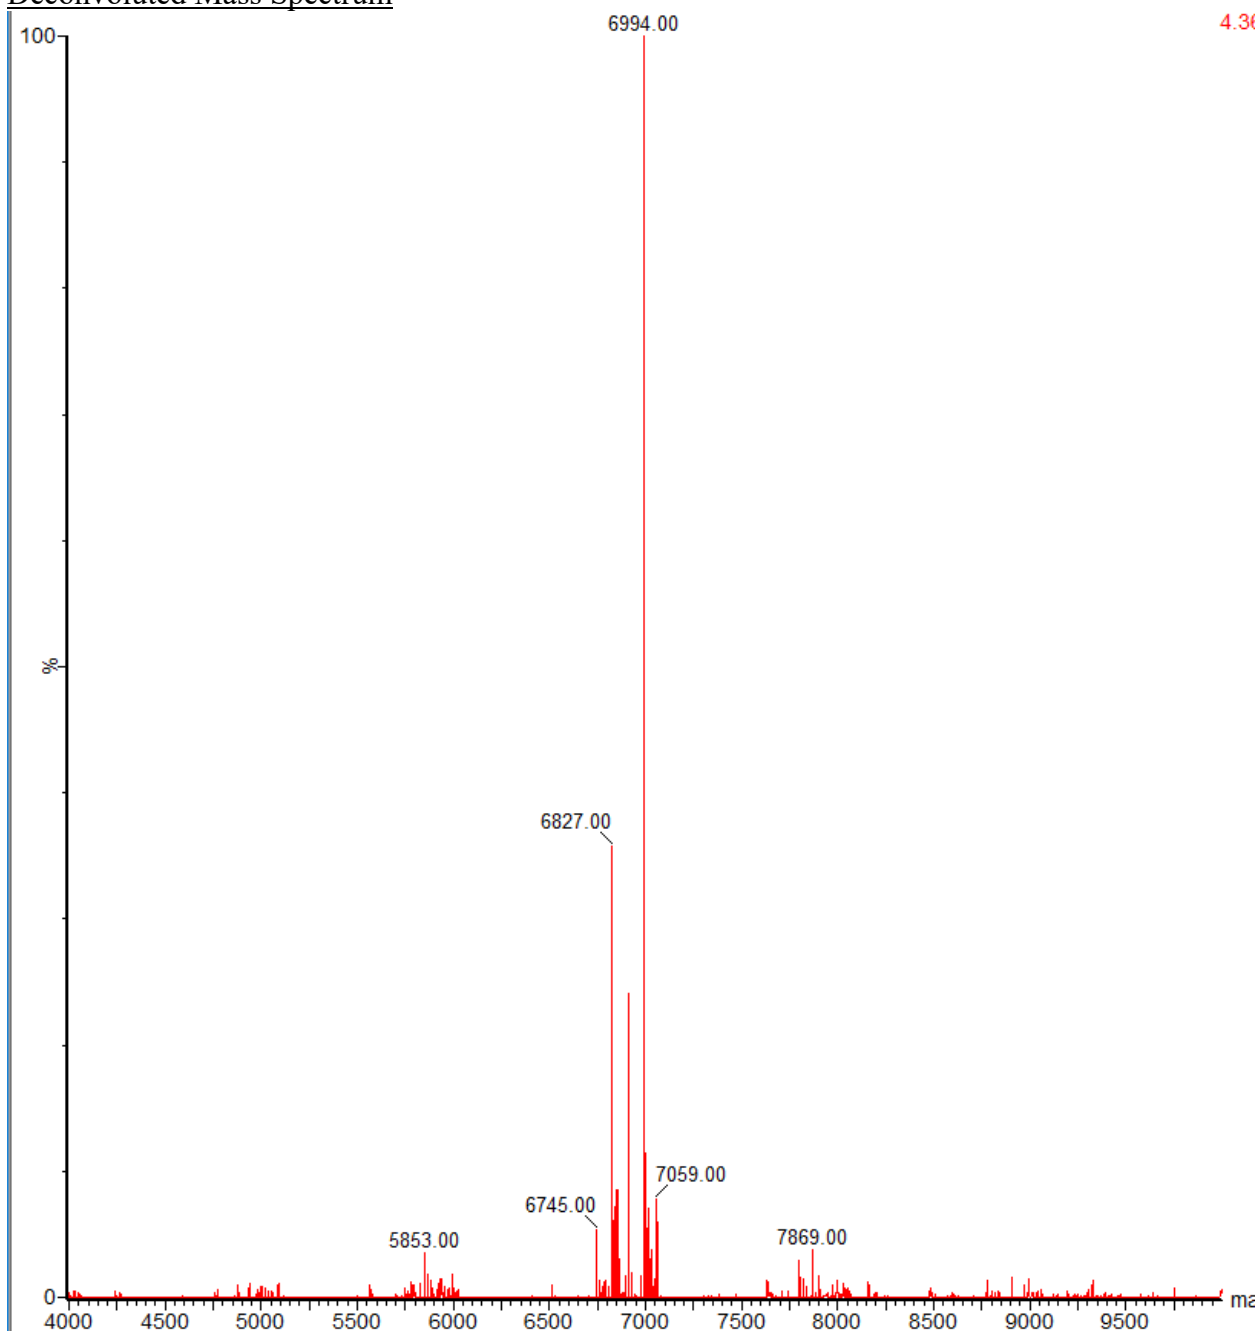

---

### **DNA-DVD conjugation procedure**

DVD in storage solution was buffer exchanged into PBS by amicon spin filter (30 kDA) and concentrated to 25  $\mu\text{M}$  ( $\sim 5$  mg/mL). This solution was used to dissolve (50  $\mu\text{L}$ ) solid DNA **64** to a presumptive concentration of 300  $\mu\text{M}$ . In addition, a second tube containing 50  $\mu\text{L}$  of DVD was aliquoted and taken through an identical process to serve as a positive control. Dissolving **64** with DVD solution was performed by vortexing the solution. This reaction mixture was incubated at 37  $^{\circ}\text{C}$  for 8 hours to produce DNA-DVD conjugate **65**. The crude reaction mixture was analyzed for conjugation efficiency as previously described by Rader *et. al.*<sup>3</sup>

---

## Methodol Assay

The methodol assay for conjugation confirmation was performed as described by Rader and co-workers. Briefly, aliquots (12.5  $\mu\text{L}$ ) of the reaction and control solutions were diluted (0.2 mg/mL relative to original antibody concentration) in PBS to a final volume of 310  $\mu\text{L}$ . Each sample were dispensed (98  $\mu\text{L}$ ) in triplicate into a black 96-well plate. Three blank wells, containing PBS were also dispensed (98  $\mu\text{L}$ ) into the black plate. A plate reader was prepared, the wavelength of excitation ( $\lambda_{\text{ext}}$ ) was set to 330 nm and wavelength of emission ( $\lambda_{\text{em}}$ ) was set to 452 nm. The instrument was programed to record every minute for 60 minutes and shake the plate in between. Finally, methodol (10 mM in ethanol) was added (2 $\mu\text{L}$ ) to each well using a multichannel pipette and the plate was immediately loaded into the plate reader and data collection initiated. Signal was determined by normalizing against the blank wells. Measurements in triplicate were averaged and plotted along with standard deviation. Standard deviation was usually smaller than the marker size. Protocol adapted from: A. R. Nanna and C. Rader, *Methods Mol Biol*, **2019**, 2033, 39-52.

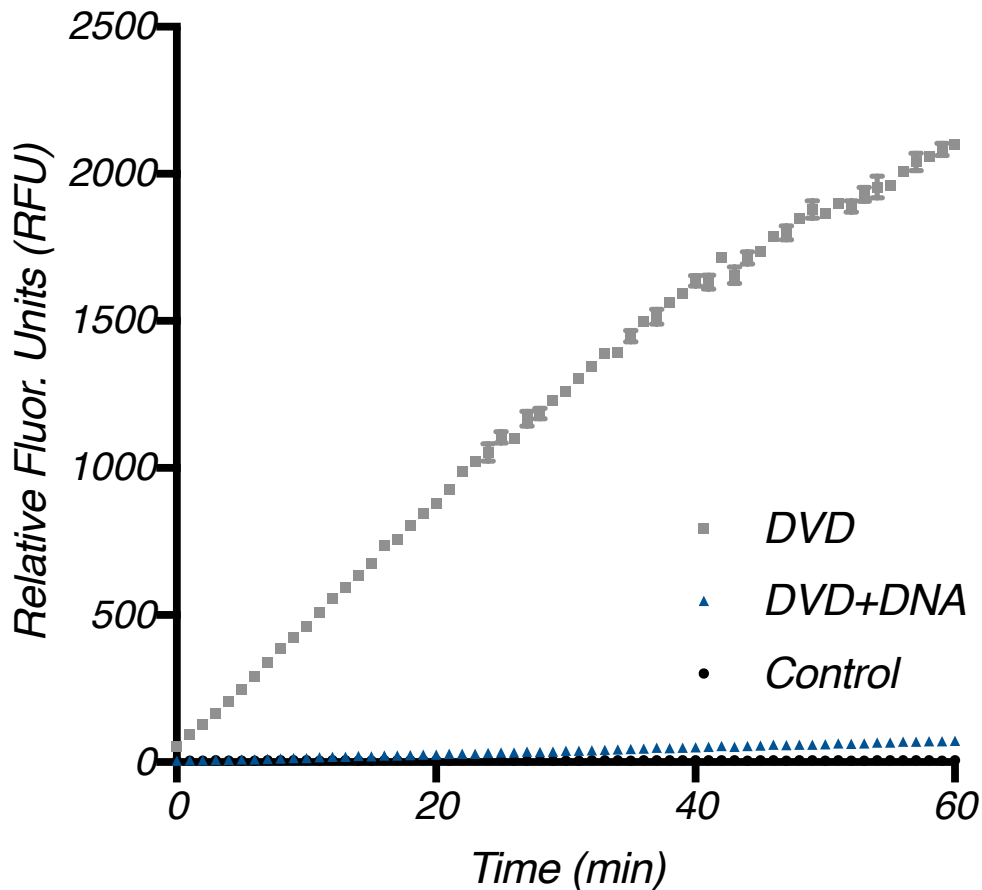

## Methodol Assay Raw Data:

| Time (min) | Control |       |       | DVD    |        |        | DVD+DNA |        |        |
|------------|---------|-------|-------|--------|--------|--------|---------|--------|--------|
| 0          | 4.813   | 6.357 | 5.112 | 56.766 | 53.479 | 51.822 | 5.719   | 3.785  | 4.994  |
| 1          | 5.779   | 3.962 | 6.109 | 95.476 | 96.689 | 89.292 | 6.114   | 5.435  | 6.685  |
| 2          | 5.863   | 5.366 | 5.509 | 125.36 | 133.37 | 127.32 | 8.667   | 6.217  | 7.122  |
| 3          | 5.548   | 6.566 | 6.439 | 166.31 | 167.88 | 166.5  | 8.773   | 7.422  | 7.704  |
| 4          | 5.777   | 4.774 | 6.747 | 206.87 | 205.98 | 204.8  | 7.166   | 7.792  | 7.928  |
| 5          | 6.511   | 4.014 | 6.368 | 249.11 | 248.03 | 243.76 | 8.767   | 9.713  | 10.174 |
| 6          | 4.227   | 5.487 | 5.596 | 291.87 | 290.45 | 286.37 | 10.22   | 9.39   | 7.816  |
| 7          | 5.7     | 5.688 | 7.117 | 336.98 | 335.9  | 336.92 | 9.428   | 12.136 | 11.267 |
| 8          | 7.151   | 4.483 | 7.073 | 391.48 | 386.59 | 383.17 | 9.949   | 14.497 | 13.91  |
| 9          | 6.632   | 6.401 | 5.278 | 437.88 | 414.02 | 416.41 | 14.196  | 13.759 | 14.397 |
| 10         | 6.318   | 5.399 | 7.315 | 471.17 | 458.82 | 456.27 | 13.645  | 14.922 | 12.905 |
| 11         | 6.58    | 4.204 | 6.119 | 511.83 | 511.51 | 501.86 | 16.444  | 15.726 | 17.444 |
| 12         | 5.014   | 6.556 | 6.253 | 561.34 | 548.15 | 561.01 | 15.801  | 19.052 | 19.132 |
| 13         | 5.269   | 6.264 | 6.618 | 597.37 | 590.15 | 590.84 | 18.221  | 17.48  | 18.54  |
| 14         | 4.601   | 7.207 | 5.439 | 637.05 | 636.35 | 631.93 | 20.223  | 21.872 | 20.629 |
| 15         | 6.21    | 4.36  | 6.972 | 683.76 | 669.1  | 672.47 | 19.044  | 19.496 | 19.355 |
| 16         | 6.395   | 6.288 | 6.027 | 747.01 | 732.83 | 727.67 | 21.755  | 24.39  | 22.252 |
| 17         | 6.729   | 5.695 | 5.602 | 760.87 | 747.73 | 763.86 | 22.258  | 23.619 | 22.843 |
| 18         | 4.902   | 7.298 | 5.627 | 810.16 | 811.91 | 793.71 | 22.088  | 25.07  | 25.425 |
| 19         | 6.954   | 6.659 | 5.49  | 854.11 | 837.49 | 844.61 | 28.222  | 23.736 | 26.629 |
| 20         | 6.867   | 5.246 | 6.748 | 886.09 | 874.09 | 874.37 | 26.365  | 25.273 | 26.677 |
| 21         | 5.383   | 5.222 | 6.976 | 936.53 | 920.21 | 923.47 | 26.192  | 29.141 | 29.523 |
| 22         | 6.852   | 6.222 | 6.126 | 1005.7 | 980.58 | 983.83 | 27.259  | 31.357 | 29.347 |
| 23         | 5.513   | 6.902 | 6.138 | 1037.5 | 1015.6 | 1007.4 | 28.634  | 28.21  | 30.814 |
| 24         | 5.68    | 5.703 | 6.87  | 1085.9 | 1027.3 | 1046.5 | 30.017  | 32.884 | 31.785 |
| 25         | 6.004   | 7.747 | 6.449 | 1115.8 | 1081.8 | 1115.6 | 34.948  | 30.753 | 35.451 |
| 26         | 6.952   | 4.984 | 4.724 | 1114.8 | 1093.5 | 1097.8 | 33.571  | 31.443 | 34.195 |
| 27         | 5.418   | 7.521 | 4.372 | 1195.4 | 1159.5 | 1147.9 | 34.929  | 36.269 | 36.388 |
| 28         | 5.892   | 6.805 | 7.725 | 1206.3 | 1176.2 | 1175.5 | 33.615  | 36.81  | 33.069 |
| 29         | 5.745   | 5.655 | 4.88  | 1230   | 1219.6 | 1237.1 | 35.952  | 35.135 | 38.308 |
| 30         | 4.098   | 6.869 | 5.767 | 1251.1 | 1258.7 | 1277   | 38.678  | 36.053 | 41.436 |
| 31         | 6.541   | 5.135 | 5.41  | 1307.8 | 1299.2 | 1307.4 | 36.99   | 41.447 | 38.118 |
| 32         | 7.755   | 6.277 | 4.241 | 1350.1 | 1336.7 | 1347.9 | 41.741  | 38.865 | 42.119 |
| 33         | 4.777   | 6.663 | 6.414 | 1402.9 | 1378.5 | 1385   | 39.111  | 44.909 | 43.161 |
| 34         | 5.165   | 7.52  | 6.512 | 1403.6 | 1373.3 | 1402.5 | 41.781  | 45.707 | 44.158 |
| 35         | 6.156   | 4.771 | 6.389 | 1457.2 | 1426.4 | 1463.8 | 42.858  | 45.501 | 45.584 |
| 36         | 7.009   | 5.765 | 5.657 | 1492.6 | 1495.6 | 1506.8 | 45.72   | 46.675 | 47.945 |
| 37         | 7.032   | 5.683 | 5.893 | 1533.3 | 1484.8 | 1524   | 47.531  | 50.302 | 49.256 |
| 38         | 4.559   | 8.857 | 5.67  | 1564.5 | 1556.7 | 1570.4 | 48.533  | 44.907 | 50.719 |
| 39         | 5.461   | 7.194 | 5.188 | 1602   | 1578.7 | 1595.3 | 45.227  | 49.651 | 52.87  |
| 40         | 6.613   | 6.042 | 7.168 | 1636   | 1617   | 1654.6 | 47.746  | 50.65  | 53.776 |
| 41         | 5.345   | 6.697 | 5.75  | 1653.5 | 1605.3 | 1635.6 | 51.599  | 53.259 | 51.561 |
| 42         | 7.773   | 6.158 | 5.62  | 1715.4 | 1702.6 | 1735.8 | 53.903  | 55.252 | 55.449 |
| 43         | 5.055   | 6.443 | 7.933 | 1669.5 | 1621.4 | 1674.1 | 52.7    | 53.942 | 51.127 |
| 44         | 4.025   | 6.35  | 5.12  | 1728.1 | 1690.6 | 1723.1 | 51.876  | 57.908 | 56.334 |
| 45         | 5.898   | 5.723 | 6.062 | 1730.9 | 1738.4 | 1741   | 56.076  | 57.615 | 55.425 |
| 46         | 6.305   | 6.259 | 6.21  | 1781.5 | 1786.7 | 1793   | 60.277  | 58.895 | 57.506 |
| 47         | 5.971   | 6.406 | 4.709 | 1825.4 | 1794.8 | 1779.1 | 56.55   | 56.585 | 60.932 |
| 48         | 5.629   | 7.202 | 5.665 | 1862.6 | 1831.8 | 1848.1 | 56.339  | 61.973 | 59.941 |
| 49         | 6.416   | 8.093 | 6.528 | 1885.7 | 1846.9 | 1905   | 58.923  | 59.38  | 59.887 |
| 50         | 6.283   | 5.27  | 6.002 | 1855.1 | 1871   | 1868.2 | 59.419  | 60.198 | 62.85  |
| 51         | 6.523   | 6.58  | 5.649 | 1905.1 | 1891.5 | 1898.9 | 60.782  | 64.608 | 66.772 |
| 52         | 7.091   | 6.33  | 4.083 | 1909   | 1869.8 | 1888.8 | 62.243  | 62.215 | 63.381 |
| 53         | 4.3     | 5.85  | 4.851 | 1948.5 | 1940.2 | 1903.4 | 64.338  | 64.485 | 63.638 |
| 54         | 5.291   | 7.323 | 7.095 | 1995.6 | 1924.7 | 1945.8 | 65.252  | 69.041 | 65.932 |
| 55         | 6.488   | 5.384 | 6.398 | 1977.5 | 1948.2 | 1958.5 | 64.439  | 68.919 | 65.464 |
| 56         | 6.149   | 4.663 | 7.725 | 2007.1 | 2016.1 | 1998.5 | 64.769  | 73.471 | 71.441 |
| 57         | 6.4     | 6.638 | 6.978 | 2071.5 | 2010.7 | 2038.2 | 67.684  | 72.716 | 70.504 |
| 58         | 6.732   | 5.518 | 6.723 | 2068.9 | 2048.8 | 2062.4 | 71.295  | 70.981 | 73.276 |
| 59         | 7.388   | 4.446 | 5.686 | 2099.6 | 2090.8 | 2060.4 | 68.77   | 73.455 | 73.328 |
| 60         | 6.68    | 4.384 | 7.986 | 2100.4 | 2110.4 | 2092.1 | 67.195  | 76.714 | 72.241 |

---

## SDS PAGE Analysis

SDS Page was performed to confirm mass increase of the DVD-DNA construct. For this analysis 1  $\mu\text{g}$  of the reaction and the control were aliquoted into PCR tubes. To these tubes 6X Lamelli buffer (6 $\mu\text{L}$ ) was added and finally the tubes were diluted with water (to 24  $\mu\text{L}$ ). These reactions were heated at 95  $^{\circ}\text{C}$  for 10 minutes before being loaded into separate lanes on a precast Bio-Rad 4-20% SDS PAGE Gel. To another lane of Bio-Rad Precision Plus Protein standard was added (7  $\mu\text{L}$ ). The rest of the lanes were loaded with 6x Lamelli buffer (6 $\mu\text{L}$ ). The gel was run at 200V for 30 minutes at which point it was stained with Coomassie protein stain and destained with water over night. Finally, the gel was imaged on a Bio-Rad gel imager. Protocol adapted from: A. R. Nanna and C. Rader, *Methods Mol Biol*, **2019**, 2033, 39-52.

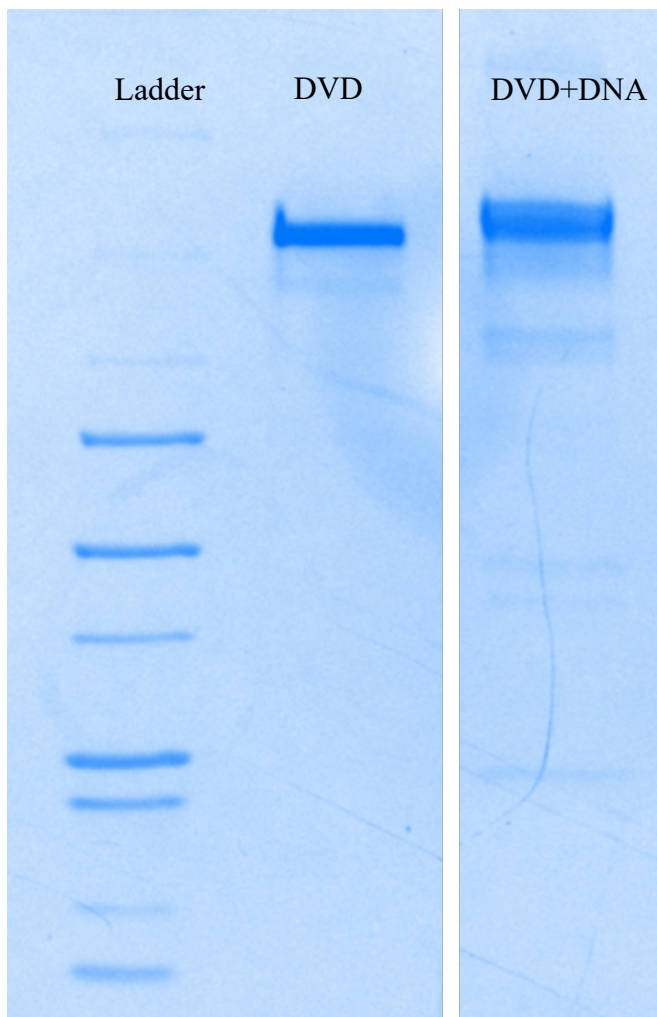

---

## Creation of Dual Labeled Probes:

### Procedure For the Creation of 67-68

#### 66→SI-41

SENDR was used to access the dual label probes. The first tag was appended to the 3' end of DNA **66** using *General Procedure 2*. Briefly, 25 nmol of precursor **66** was loaded onto 100  $\mu\text{L}$  of equilibrated resin. This loaded resin was washed with DMA (500  $\mu\text{L}$  twice) and dry THF (500  $\mu\text{L}$  three times) and dried under vacuum.  $\Psi$ -5 in MeCN (150 mM, 250  $\mu\text{L}$ ) was added to the loaded and dried resin. Then DBU (450 mM, 18  $\mu\text{L}$ ) was added to the reaction mixture. The reaction tube was vortexed for 30 seconds and incubated at 37 °C for various amounts of time. The reactions were worked up by aspirating and discarding the reaction solution, and washing the resin bed with MeCN (500  $\mu\text{L}$ ) and 1:1 MeCN:PBS (500  $\mu\text{L}$ ). Elute buffer (300  $\mu\text{L}$ ) was added to the resin bed and the tube was agitated by orbital shaker for 5-10 minutes. The DNA containing elution buffer was collected by carefully pipetting the supernatant. DNA was isolate *via* ethanol precipitation. Ethanol precipitation was performed by adding 10% v/v of a NaCl solution (30  $\mu\text{L}$ , 5M) to the elute buffer and three volumes of cold ethanol (-20°C) were added to the tube (~1000 $\mu\text{L}$ ) and incubated for 18 hours at -20 °C. The tube was then centrifuged at 13,000 rpm for 15 minutes to pellet the DNA, and the extra ethanol was decanted off. The tubes were dried *via* speed vacuum and the DNA was dissolved and HPLC-MS analysis was performed.

#### SI-41→67

Dephosphorylation of the 5' end of **SI-41** to generate **67** along with degradation of unlabeled 3' DNA was carried out as follows. The crude reaction mixture from the previous step was dissolved in water (120  $\mu\text{L}$ ). This solution was aliquoted (40 $\mu\text{L}$ ) into three separate PCR tubes. To these tubes, Cut Smart 10X Buffer was added (5 $\mu\text{L}$ ) and the tubes were vortexed. Finally, rSAP (2.5  $\mu\text{L}$ ) and ExoIII (2.5 uL) was added to each tube. These tubes were vortexed, spun down and placed in a thermocycler. They were incubated at 37 °C for 60 min, then the enzymes were deactivated at 70 °C for 10 minutes. The reaction mixtures were isolated by zymo spin column.

#### 67→68

**67** was loaded onto resin and modified with SENDR by *General Procedure 2* using  $\Psi$ -17. After this reaction, the crude reaction mixture is ethanol precipitated, pelleted, dried, dissolved and analyzed by HPLC-MS.

### Lambda Exo Cleanup of 68

**68** was loaded into a PCR tube (5  $\mu\text{g}$ ) in 30 uL water. To each tube CutSmart (5  $\mu\text{L}$  at 10x), ATP (5 $\mu\text{L}$  at 5 mM) and DTT (5 $\mu\text{L}$  at 50 mM) was added. Finally Lambda exonuclease (2.5  $\mu\text{L}$ ) and T4PNK (2.5  $\mu\text{L}$ ) were added. These tubes were incubated for 90 minutes at 37°C at which point the enzymes were thermally deactivated at 75°C for 10 minutes.

#### 68→SI-42→69

**68** was added to a PCR tube in 38  $\mu\text{L}$  water. To this tube DMSO (8  $\mu\text{L}$ ), Tris buffer (2  $\mu\text{L}$ , 1M at pH 8.5) and DBCO Fluorescein (2  $\mu\text{L}$ , 10 mM, in DMSO) were added. This reaction was allowed to incubate at 37°C for 120 minutes and excess reagents were removed by zymo spin column. Resulting in FAM labeled probe **SI-42**. To **SI-42** in water (30  $\mu\text{L}$ ), Tris Buffer (1  $\mu\text{L}$ , 1 M pH 8.5), BTTP (2  $\mu\text{L}$ , 20 mM in water),  $\text{CuSO}_4$  (1  $\mu\text{L}$ , 20 mM, in water), DMSO (14  $\mu\text{L}$ ),  $\text{MgCl}_2$  (1  $\mu\text{L}$ , 1 M in water), and BHQ-Azide **SI-61** (1  $\mu\text{L}$ , 5 mM in DMSO) were added. Finally, NaAsc (1  $\mu\text{L}$  100mM) was added and the reaction was incubated at 37°C for 60 minutes. The final dual labeled probe **67** was isolated by ethanol precipitation and analyzed by HPLC MS.

### 68 $\rightarrow$ SI-42

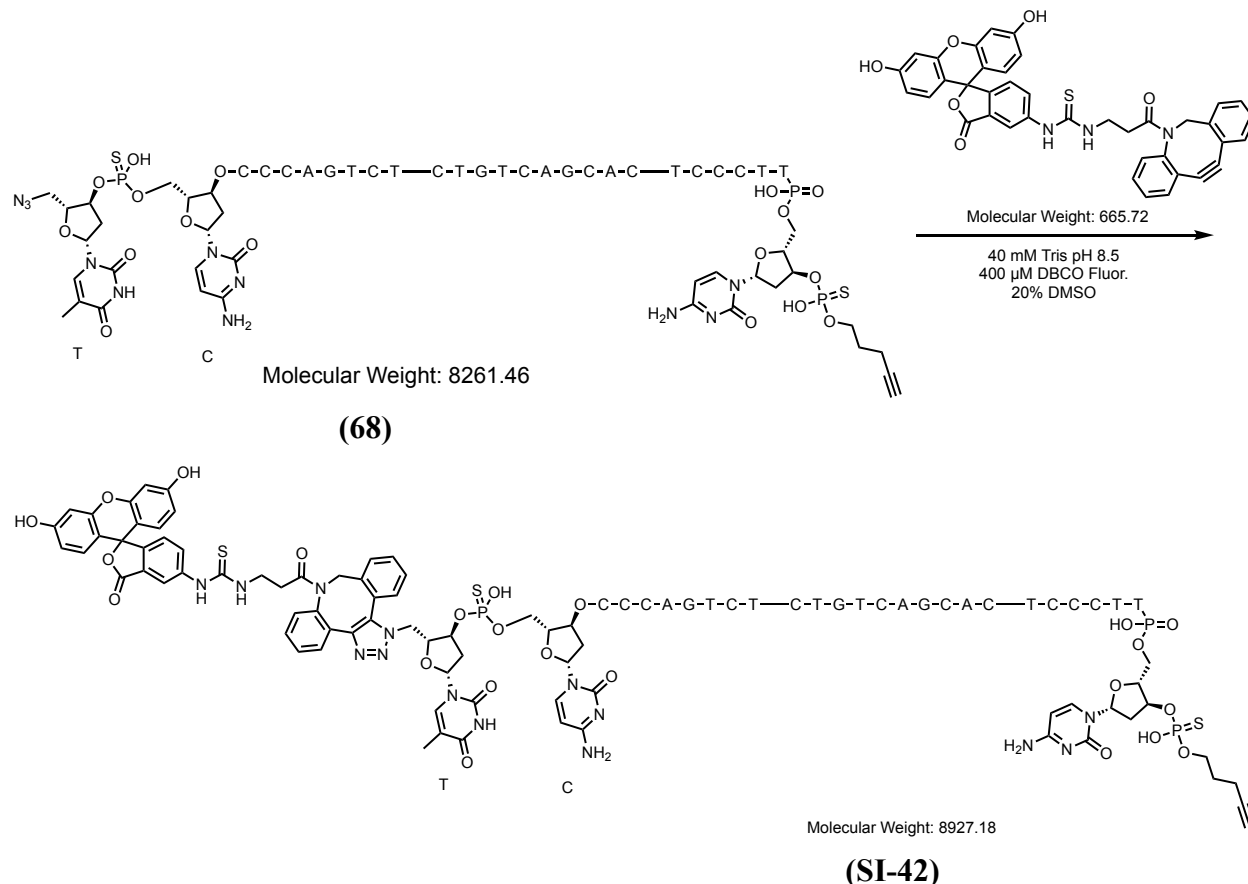

SI-42 → 69

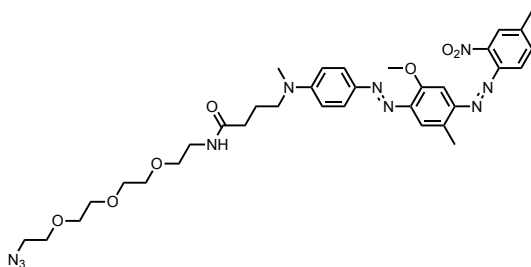

Molecular Weight: 704.79

SI-42

100 μM BHQ<sub>1</sub> Azide  
800 μM BTTP  
400 μM CuSO<sub>4</sub>  
20 mM Tris pH 8.5  
20 mM MgCl<sub>2</sub>  
2 mM NaAsc  
15% DMSO

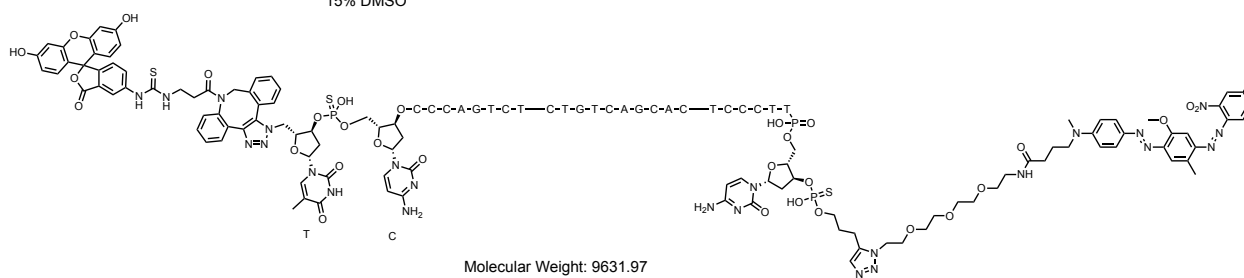

Molecular Weight: 9631.97

(69)



---

---

### LCMS Characterization of SI-41

Produced from **66** by General Procedure **3**:

Using **Ψ-5**

Expected Mass: 7996.2

Expected (M-7)/7 Ion: 1141.3

Found Deconvoluted Mass: 7996.0

Found (M-7)/7 Ion: 1140.93

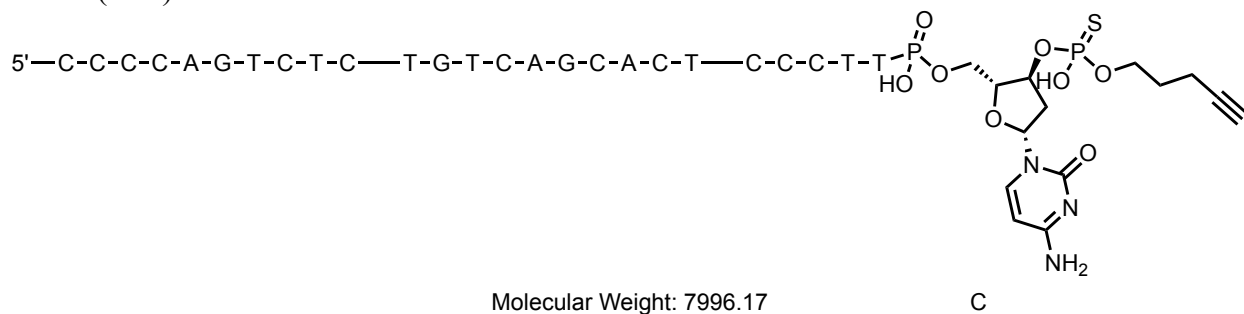

### A260 Chromatogram

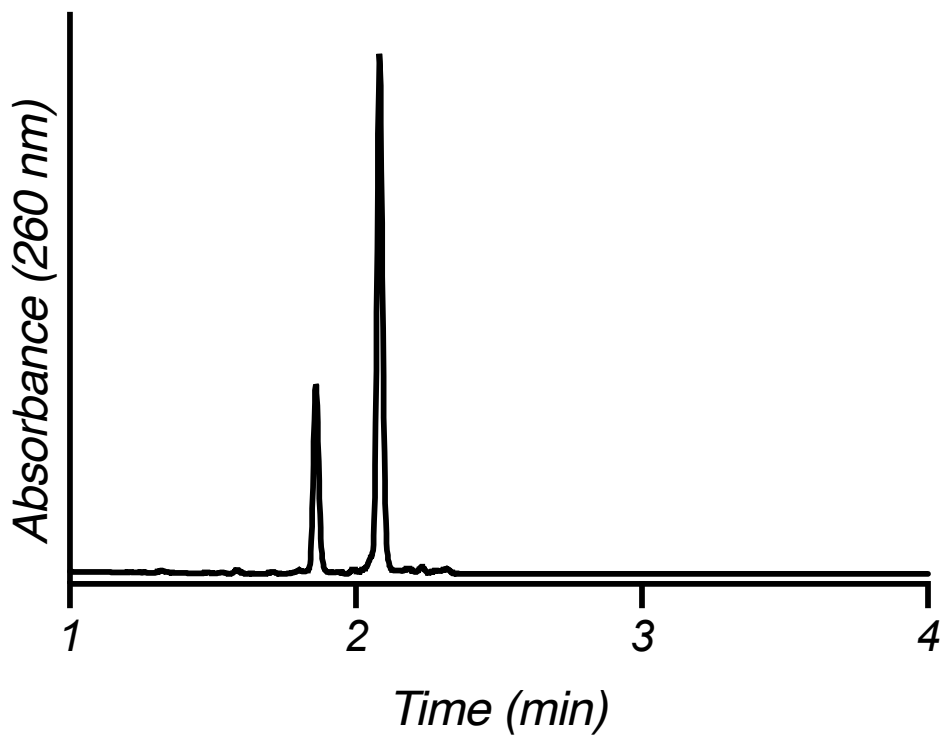

Mass Spectrum (RT= 2.10 min)

2.36e5

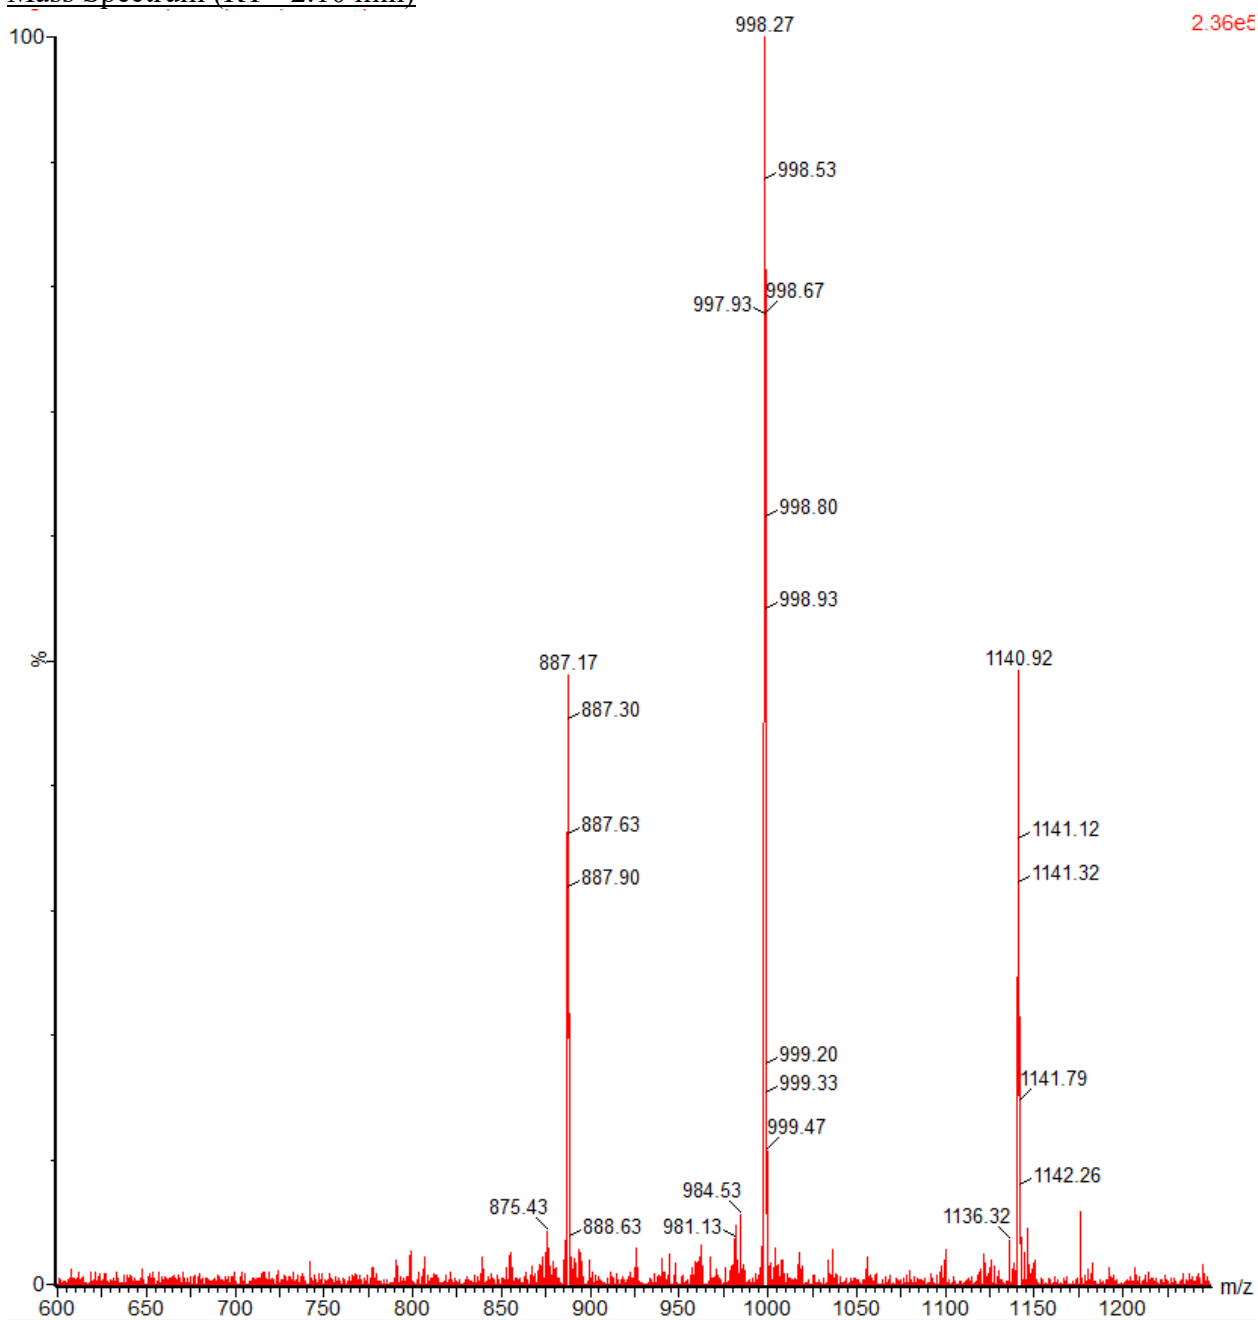

# Deconvoluted Mass Spectrum

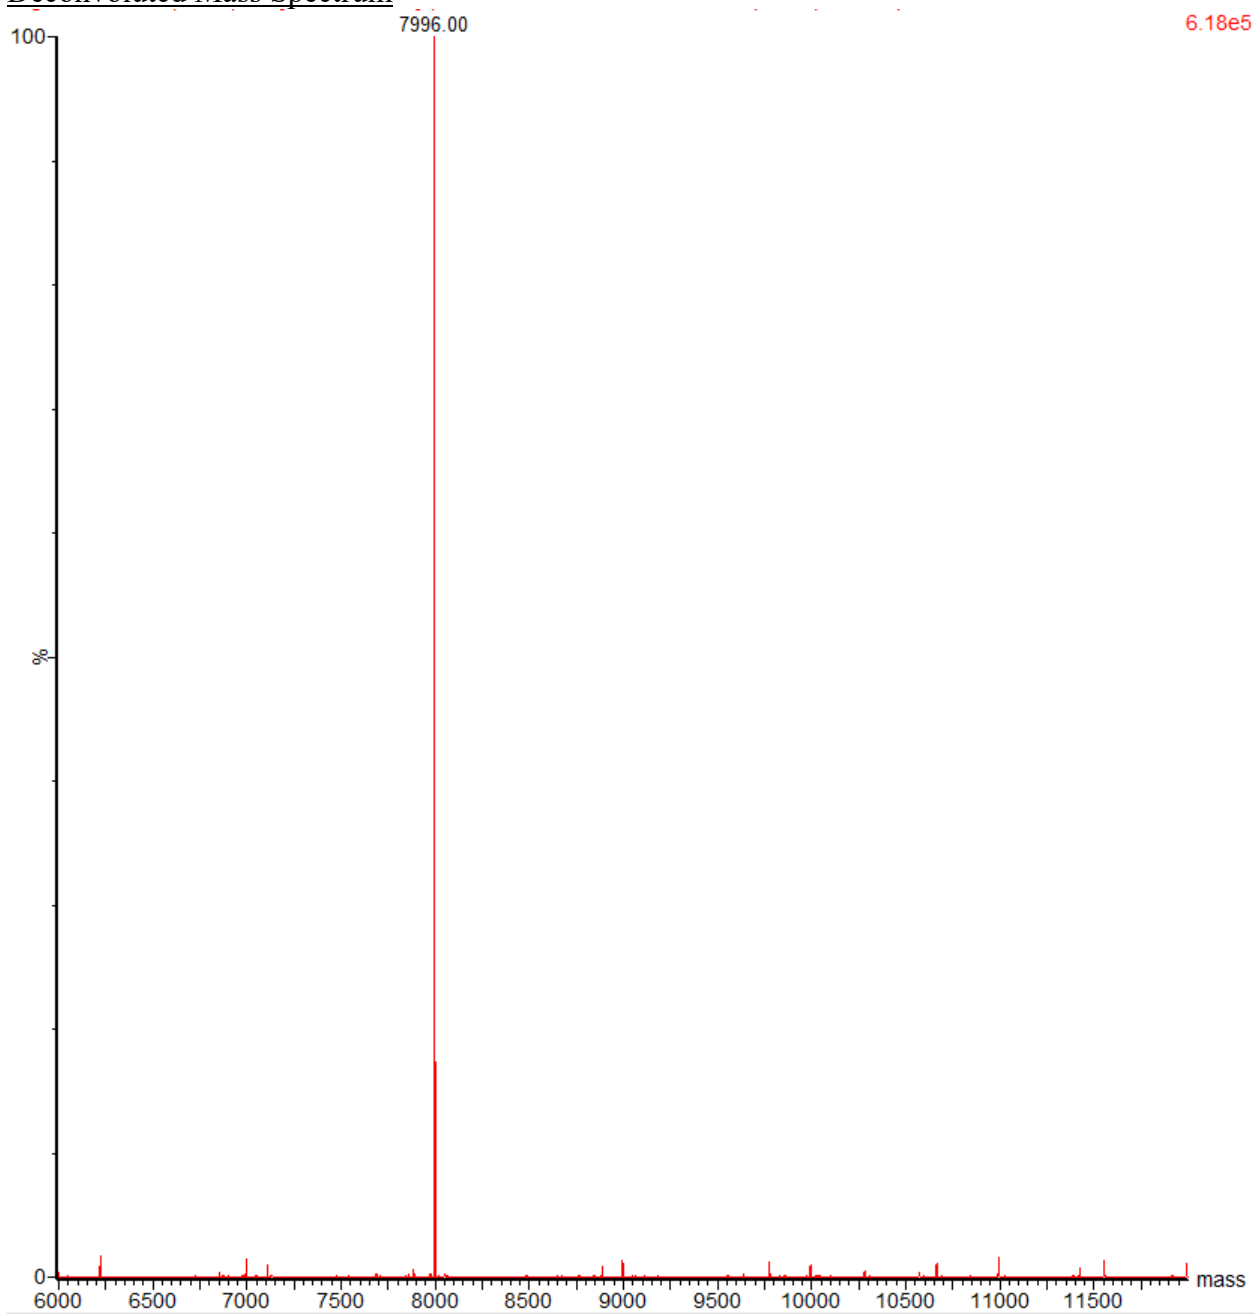

---

### LCMS Characterization of 67

Produced from **SI-41** by rSAP and ExoIII:

Expected Mass: 7916.2

Expected (M-7)/7 Ion: 1129.88

Found Deconvoluted Mass: 7917.0

Found (M-7)/7 Ion: 1129.65

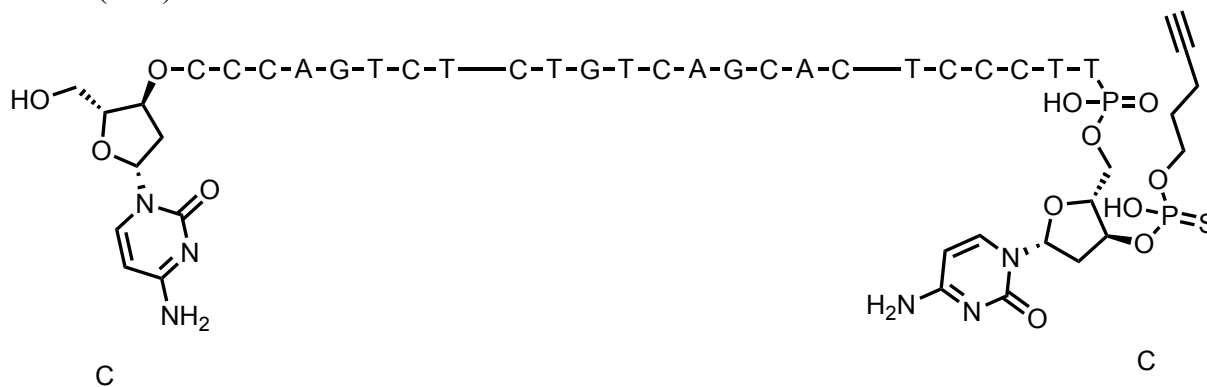

Molecular Weight: 7916.19

### A260 Chromatogram

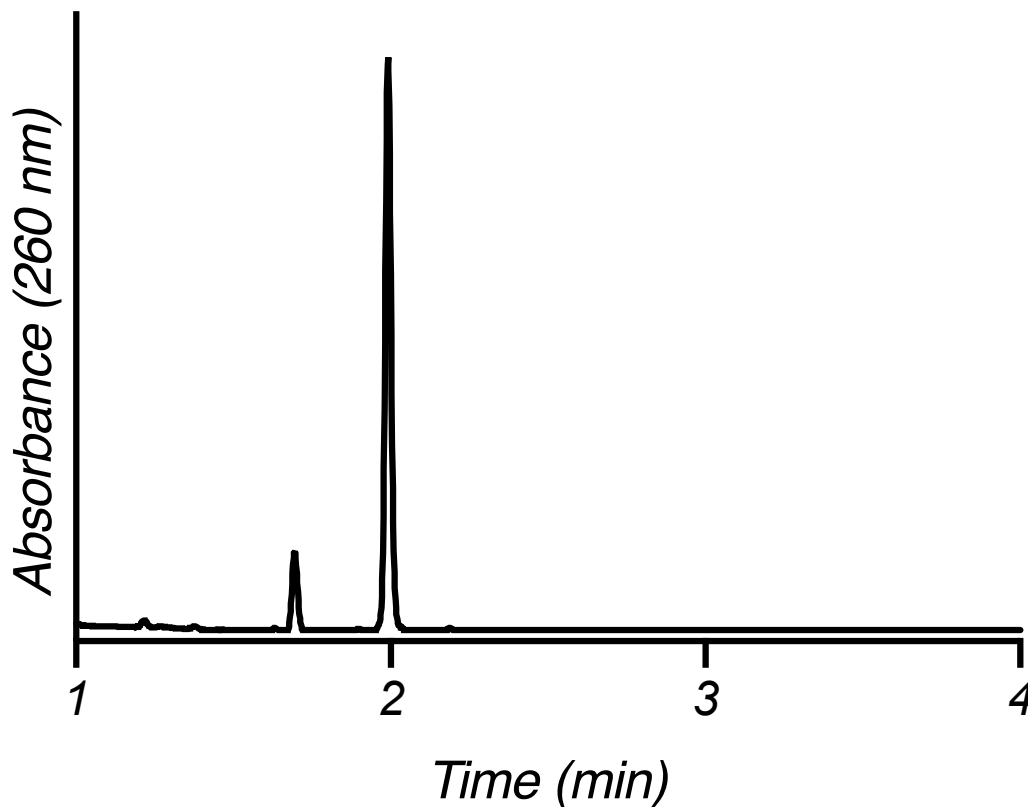

Mass Spectrum (RT= 2.07 min)

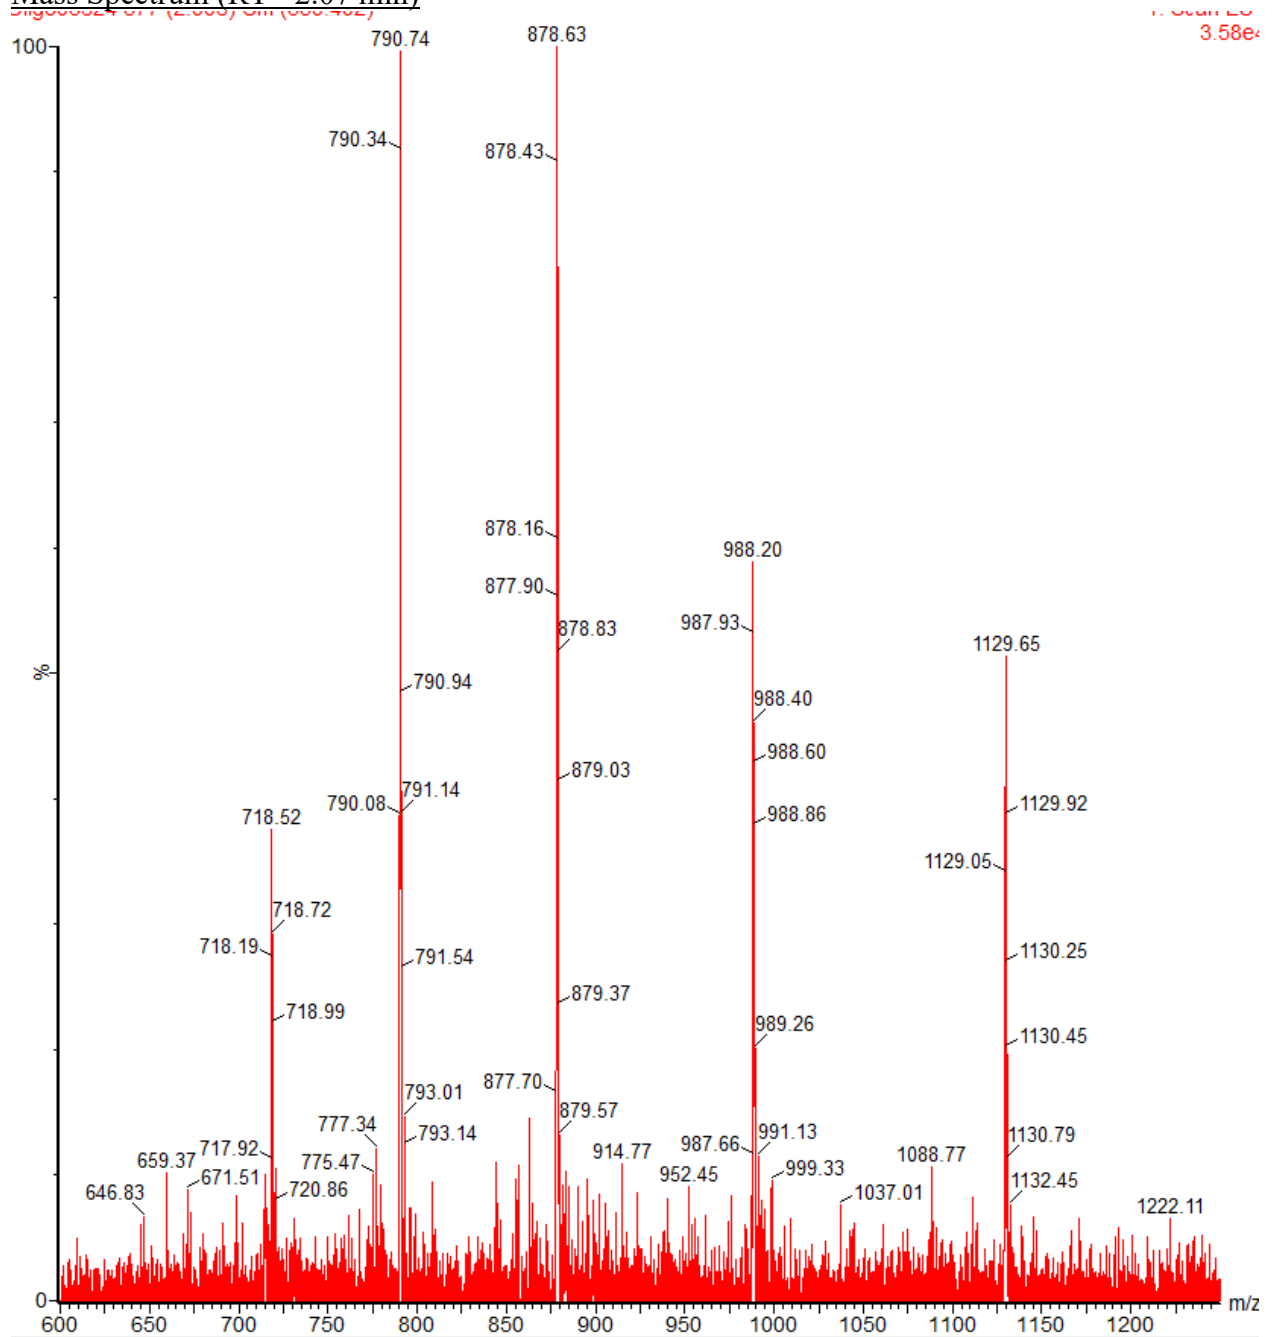

# Deconvoluted Mass Spectrum

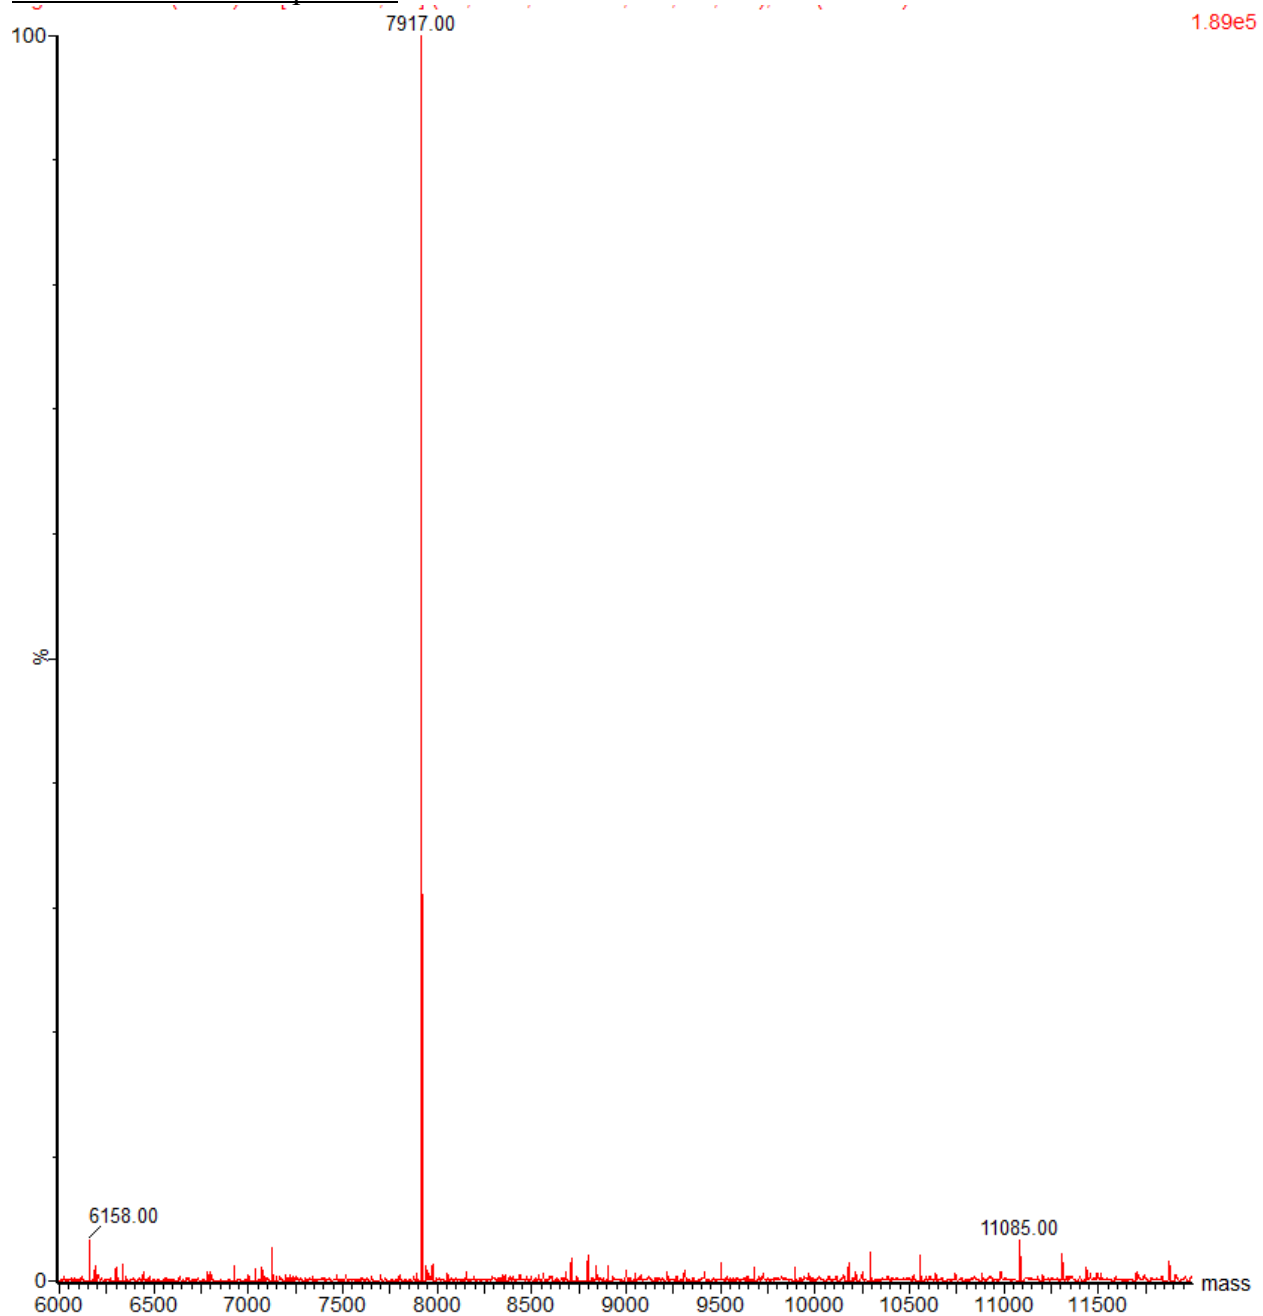

---

### LCMS Characterization of 68

Produced from **61** by General Procedure **2**:

Using  $\Psi$ -17

Expected Mass: 8261.5

Expected (M-7)/7 Ion: 1179.2

Found Deconvoluted Mass: 8262.0

Found (M-7)/7 Ion: 11790.1

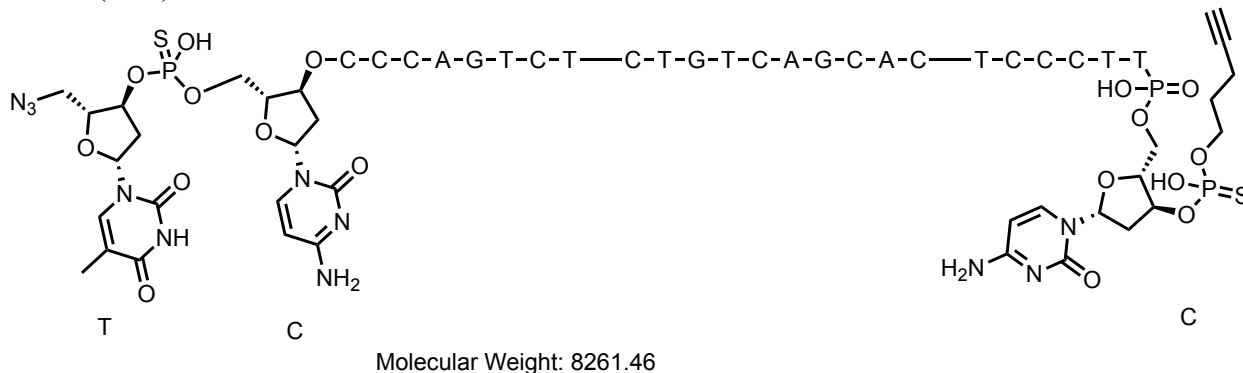

### A260 Chromatogram

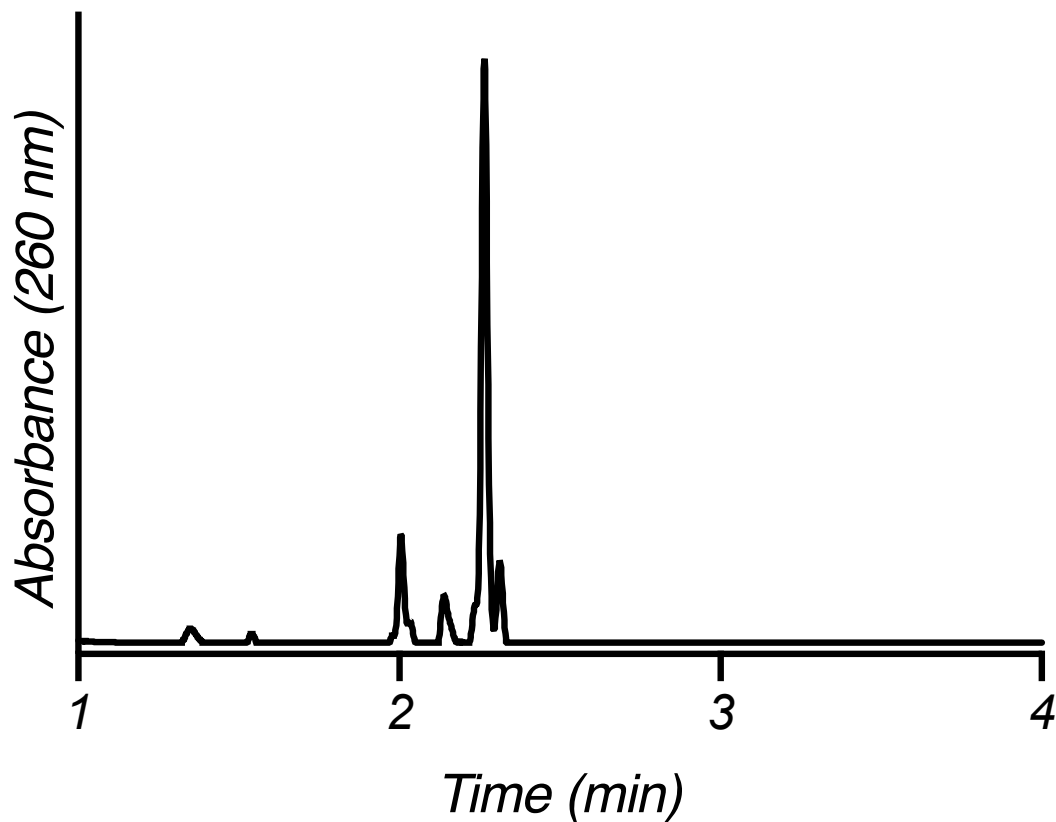

Mass Spectrum (RT= 2.2 min)

7.46e5

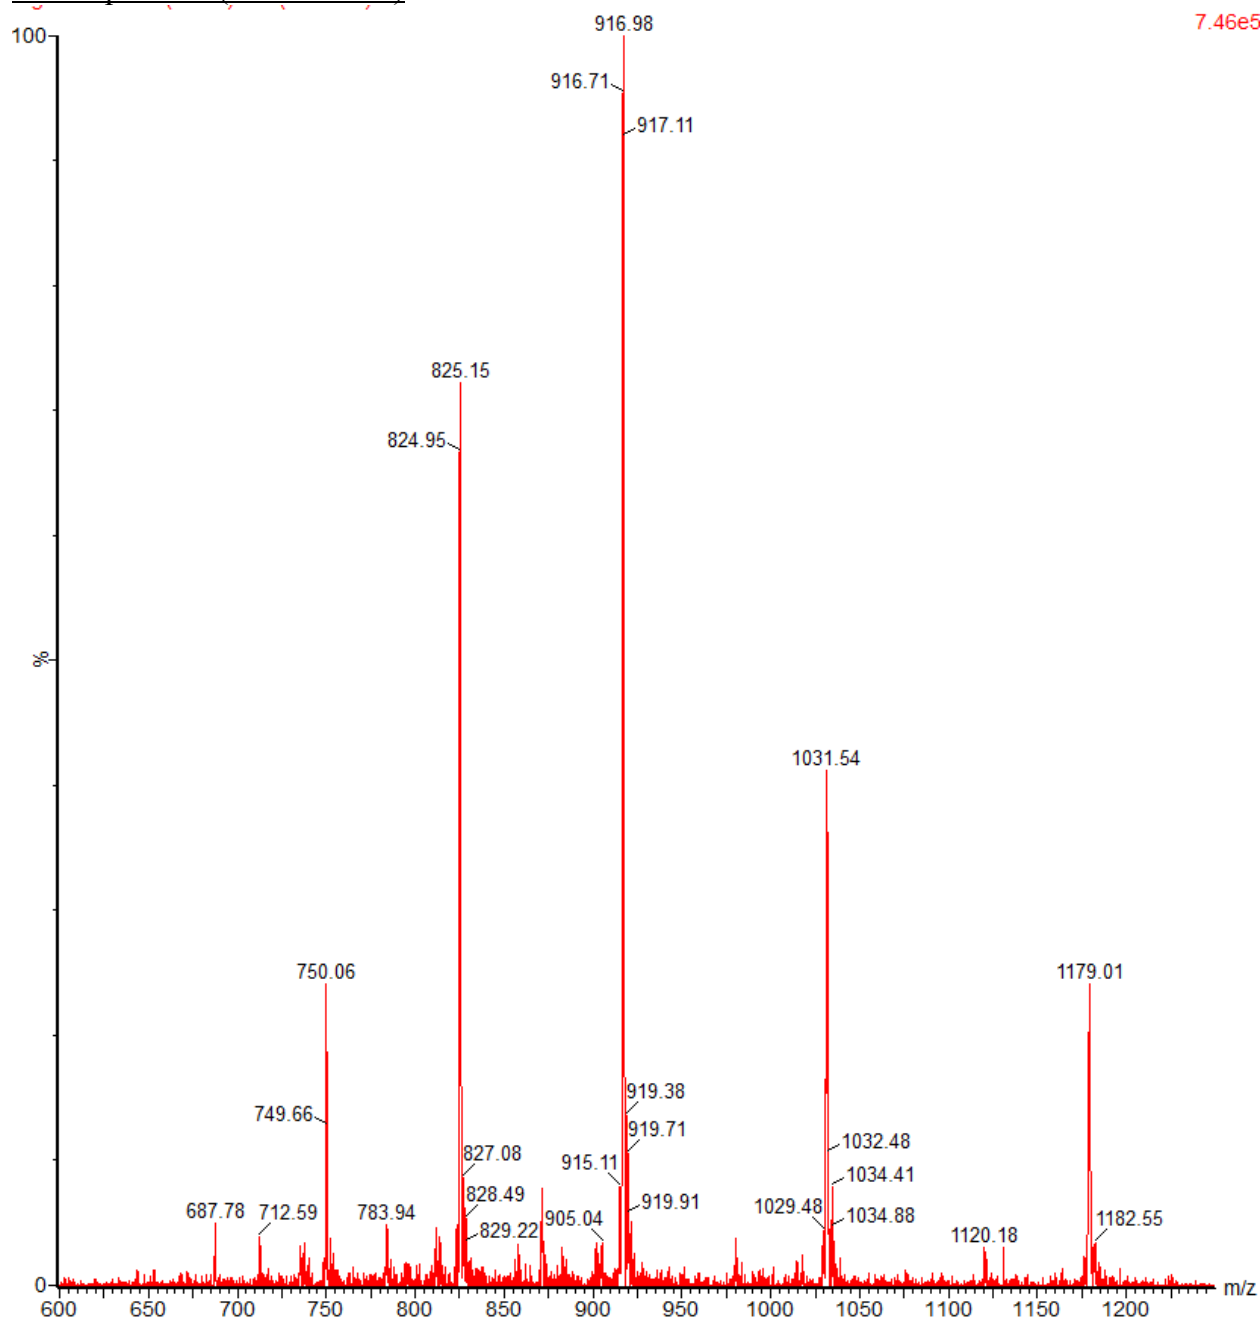



# Deconvoluted Mass Spectrum

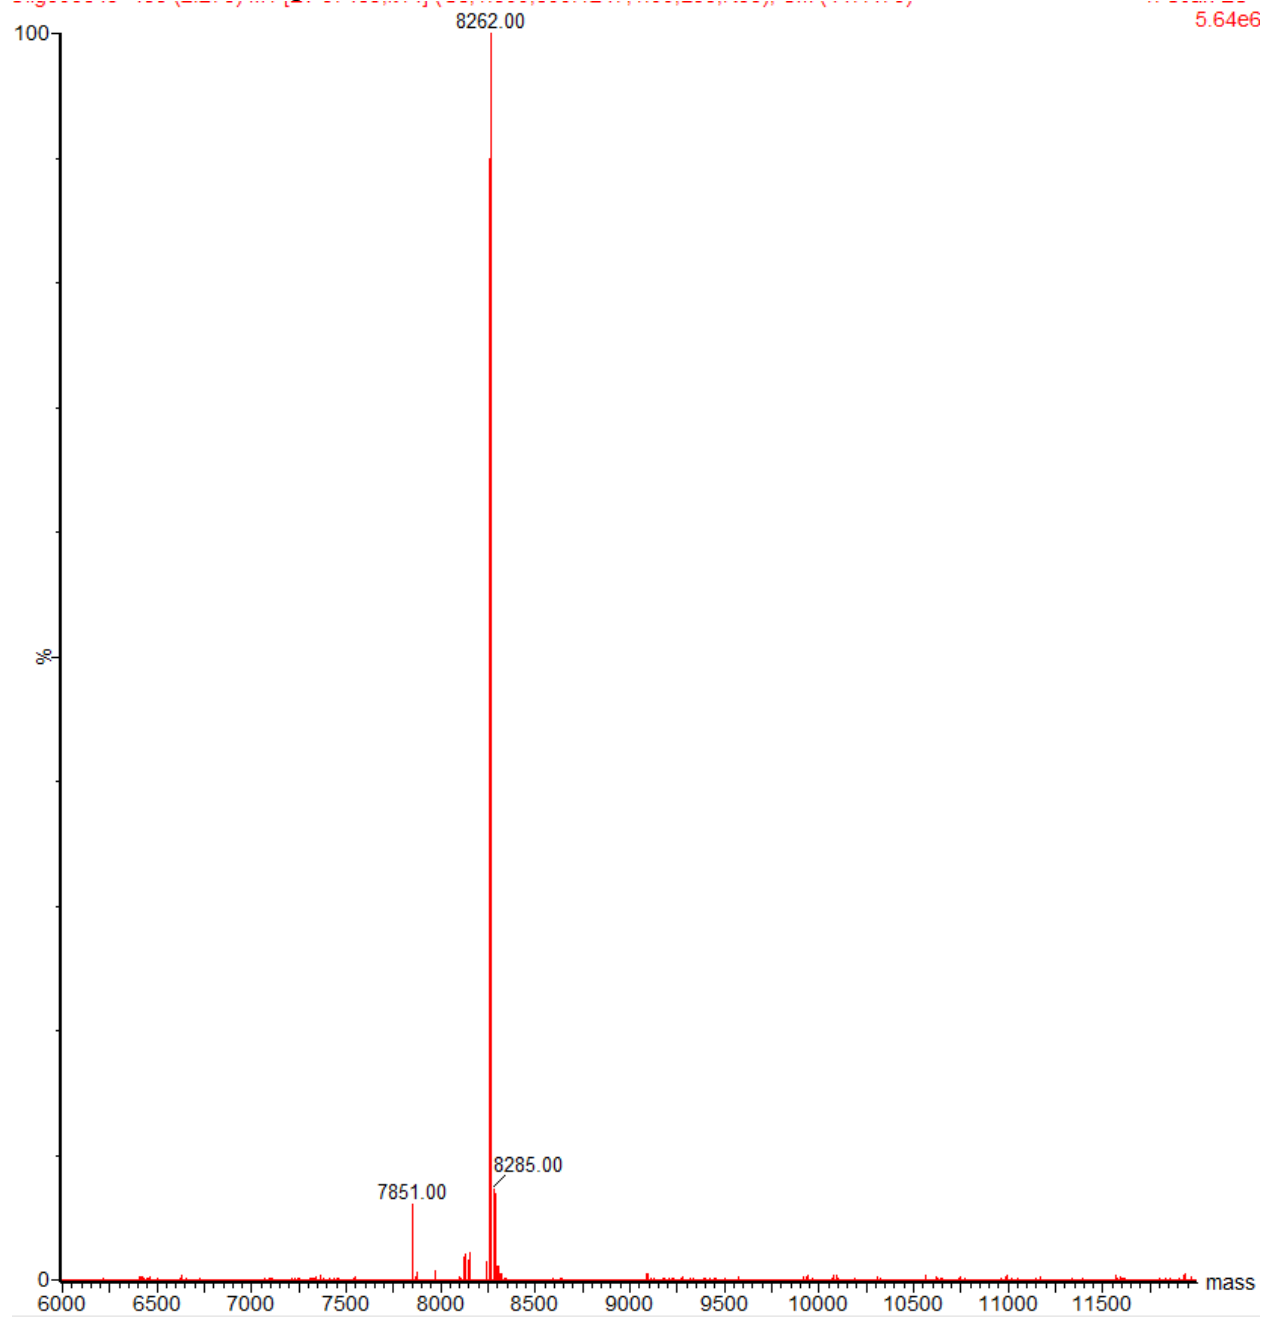

## LCMS Characterization of 68 After Enzymatic Cleanup

Produced from **68**:

Expected Mass: 8261.5

Expected (M-7)/7 Ion: 1179.2

Found Deconvoluted Mass: 8262.0

Found (M-7)/7 Ion: 11790.1

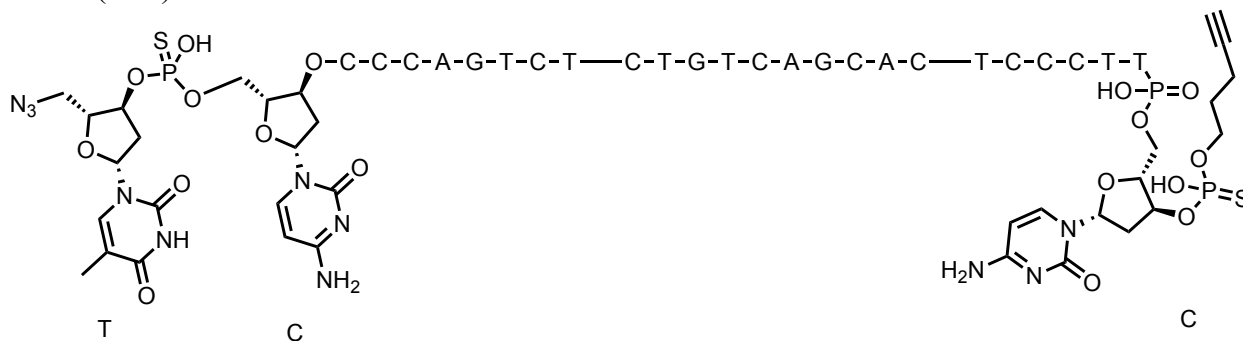

Molecular Weight: 8261.46

### A260 Chromatogram

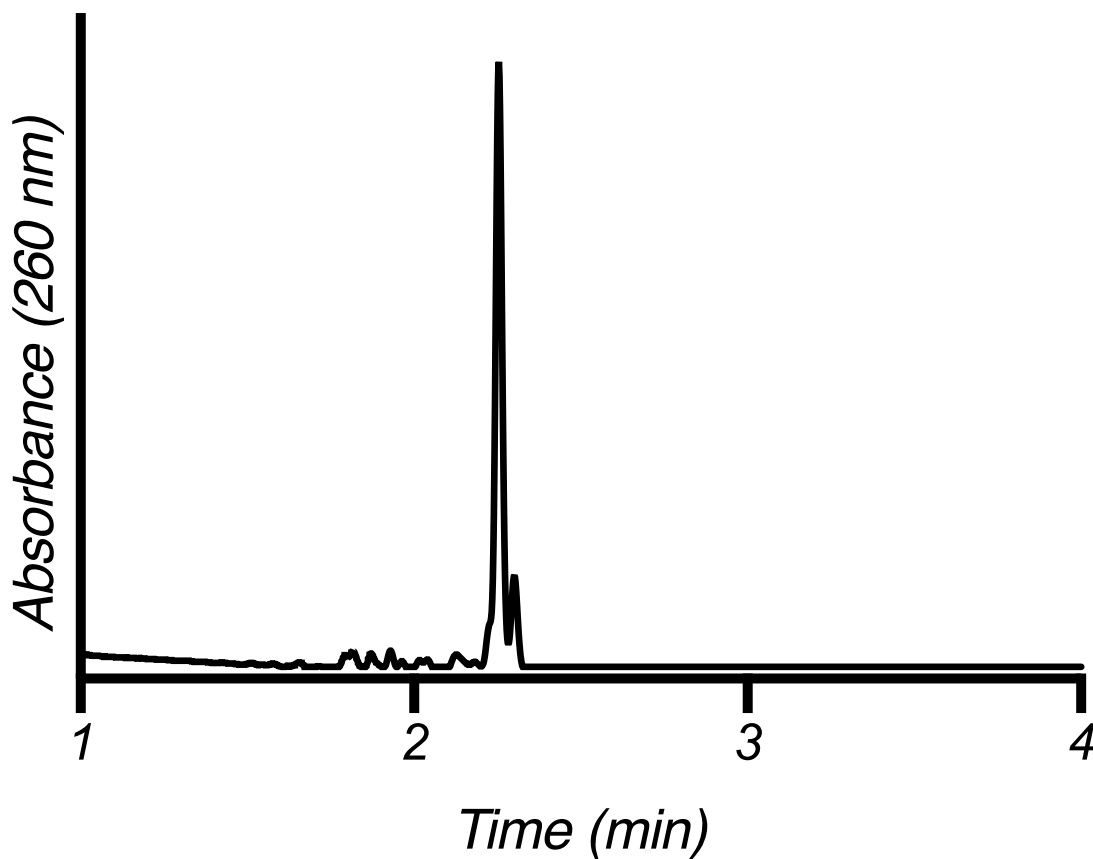

Mass Spectrum (RT= 2.2 min)

3.49e5

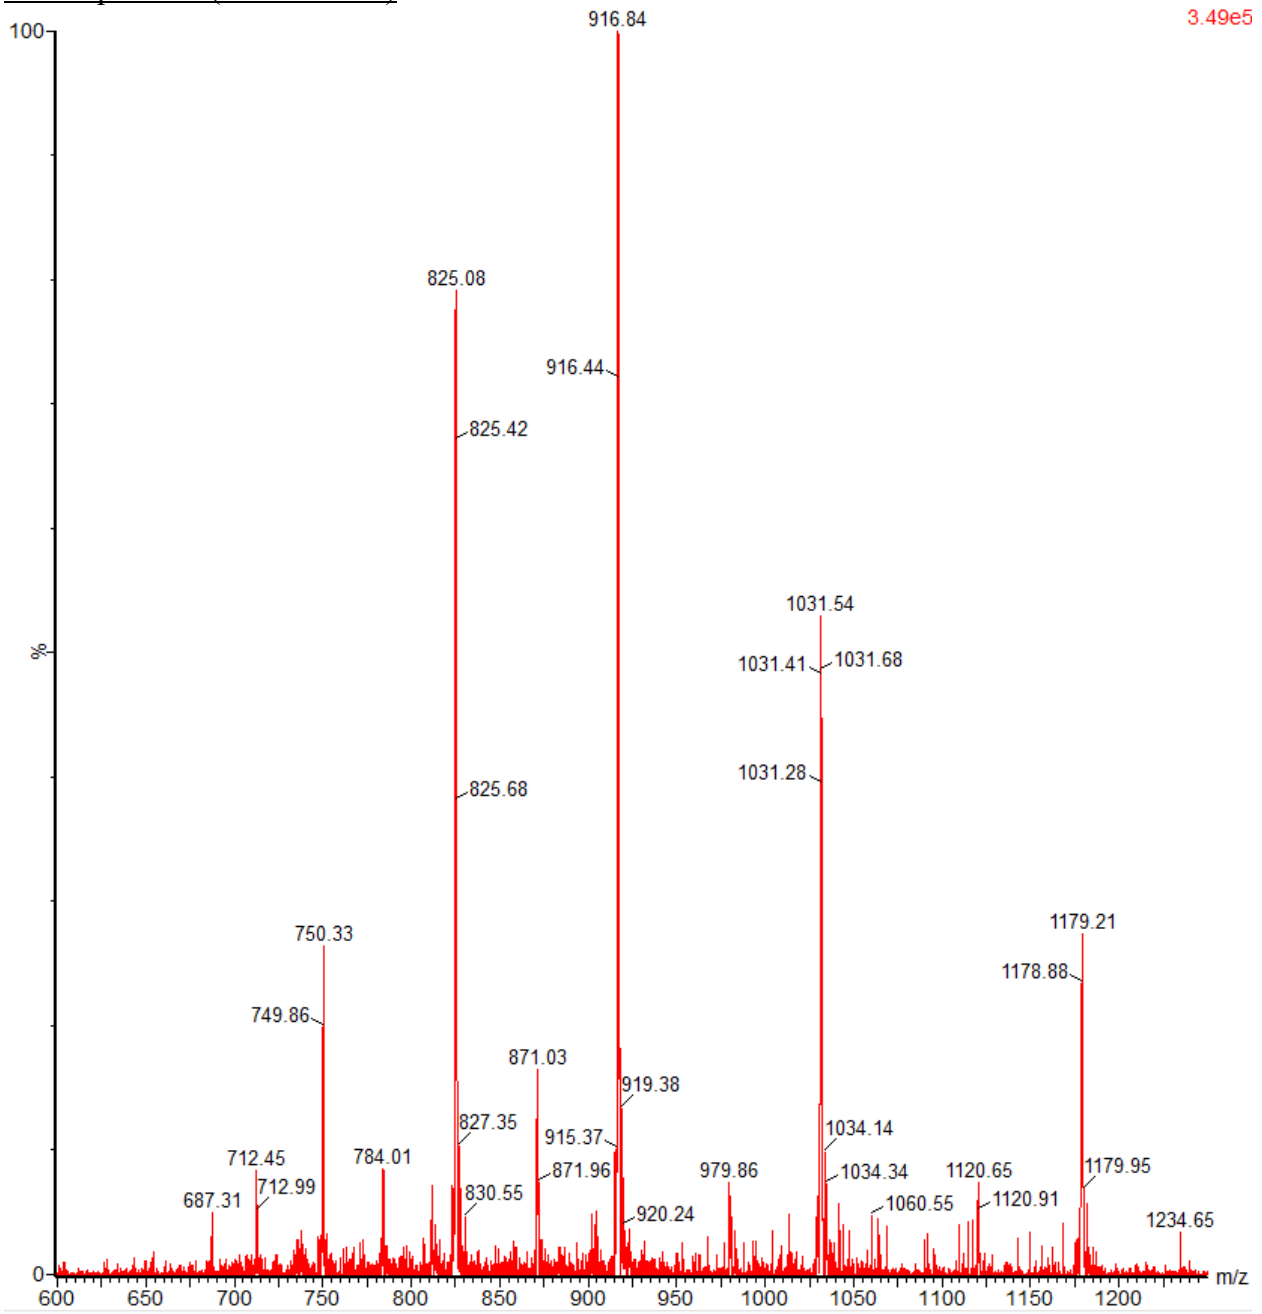

# Deconvoluted Mass Spectrum

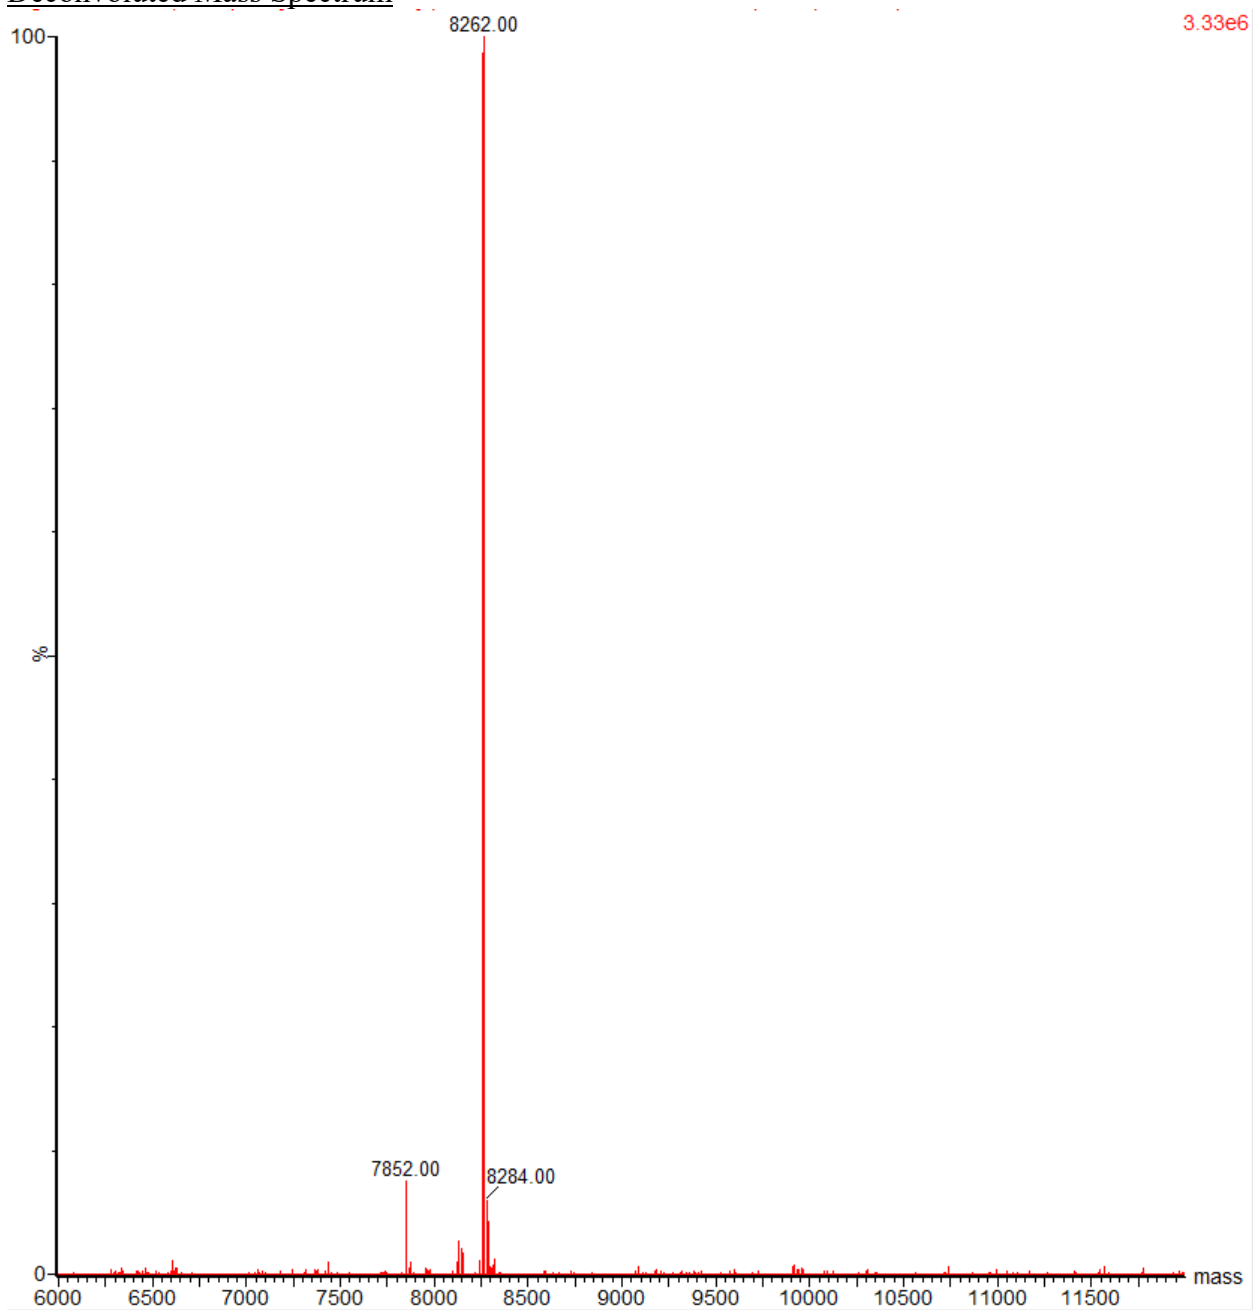

## LCMS Characterization of SI-42

Produced from **68** by General Procedure **SPAAC**:

Expected Mass: 8927.2

Expected (M-8)/8 Ion: 1114.9

Found Deconvoluted Mass: 8927.00

Found (M-7)/7 Ion: 1114.51

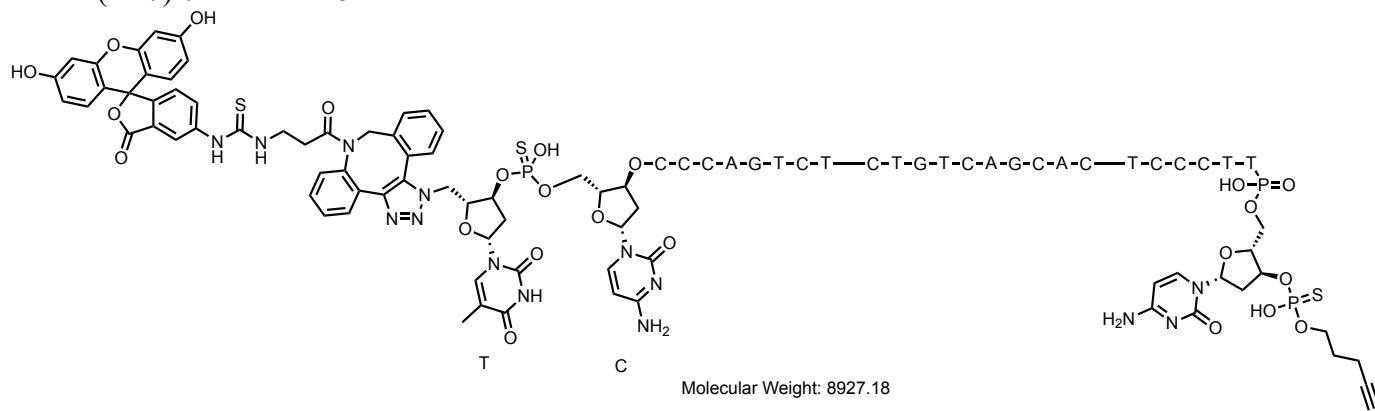

**+Isomer**

## A260 Chromatogram

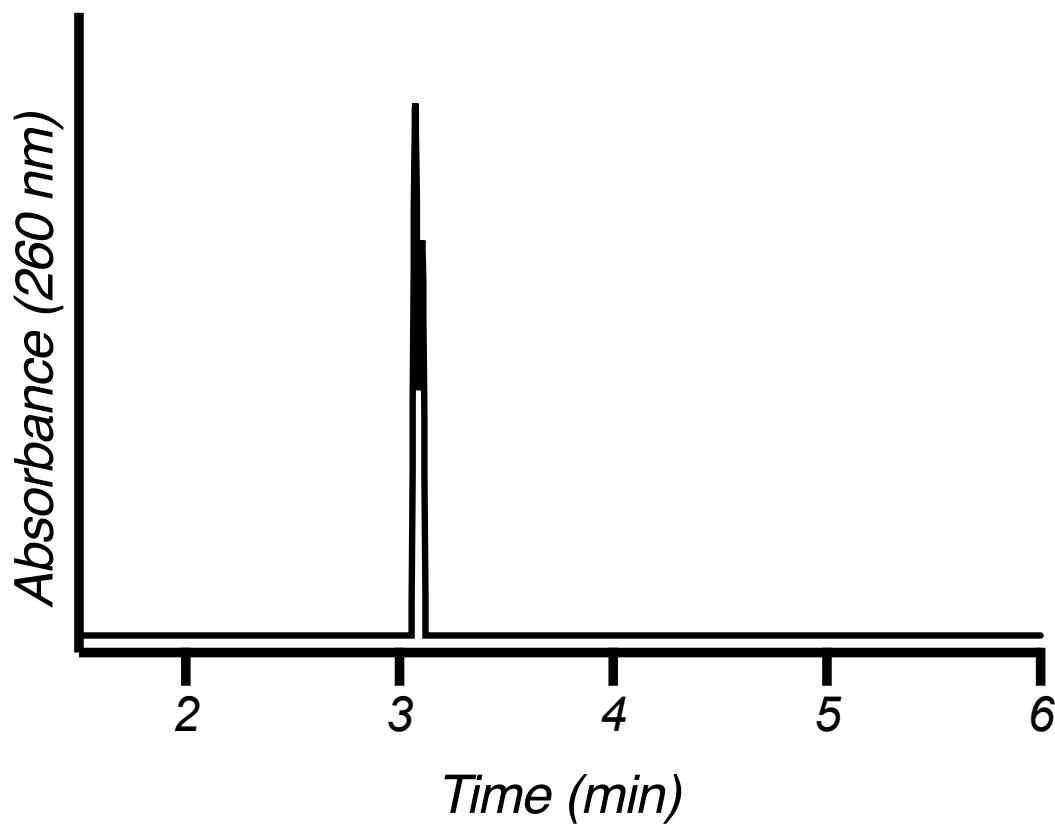

# Mass Spectrum

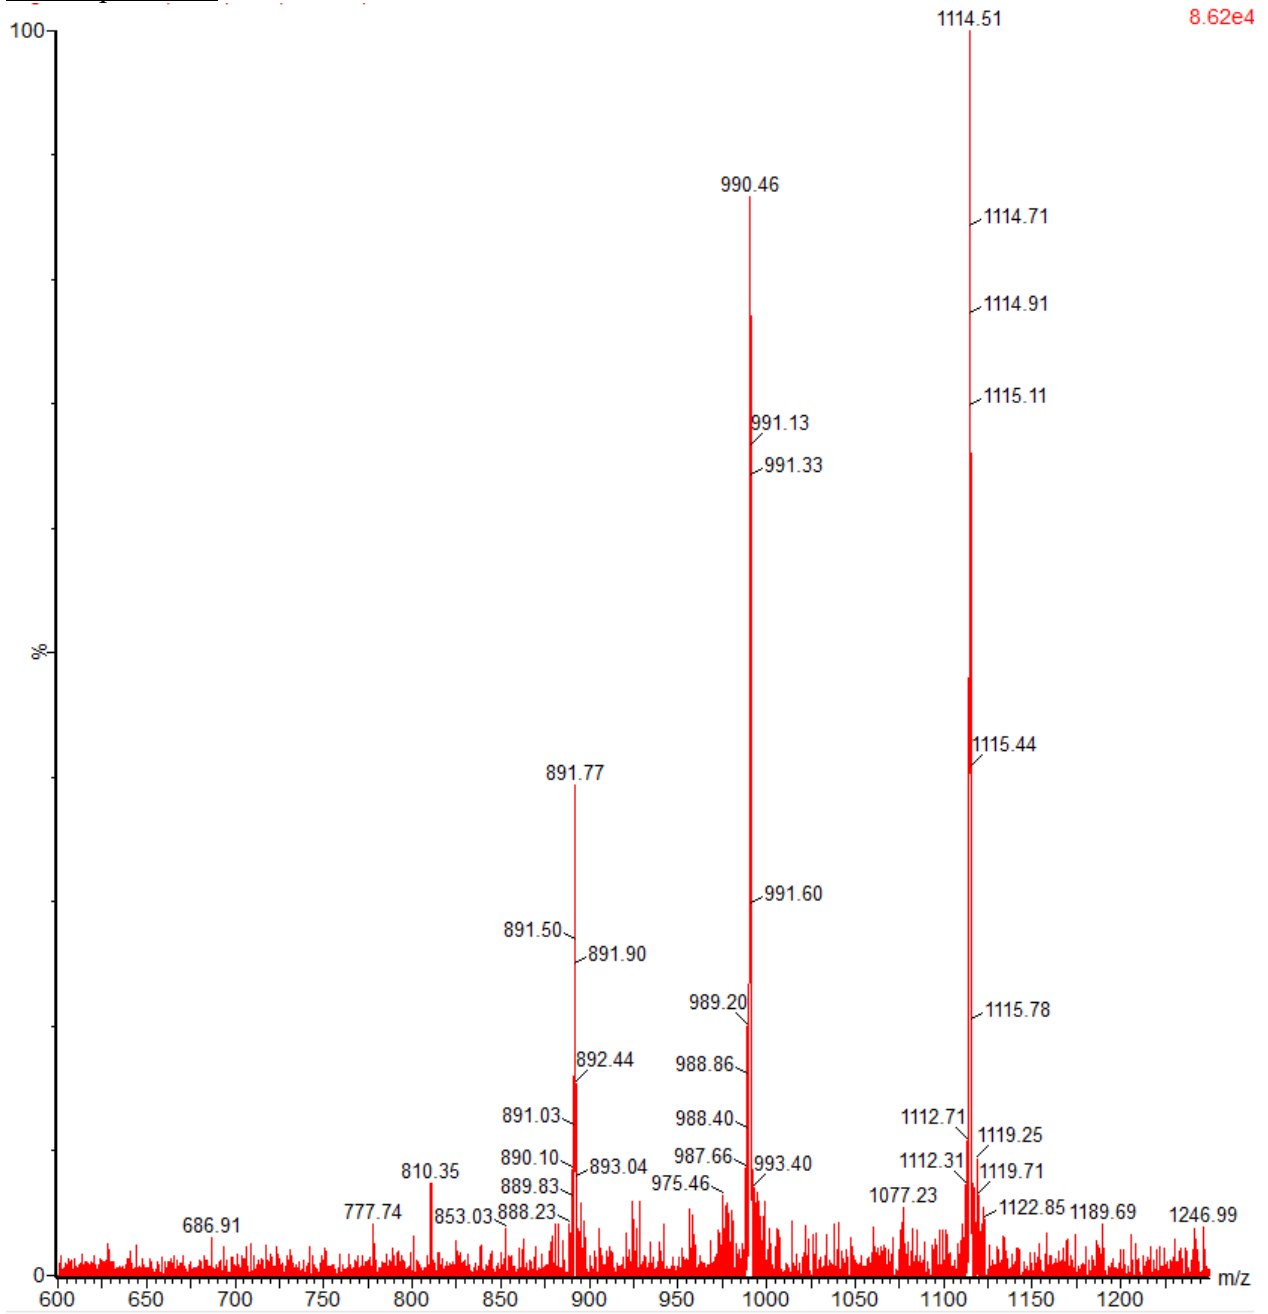

# Deconvoluted Mass Spectrum

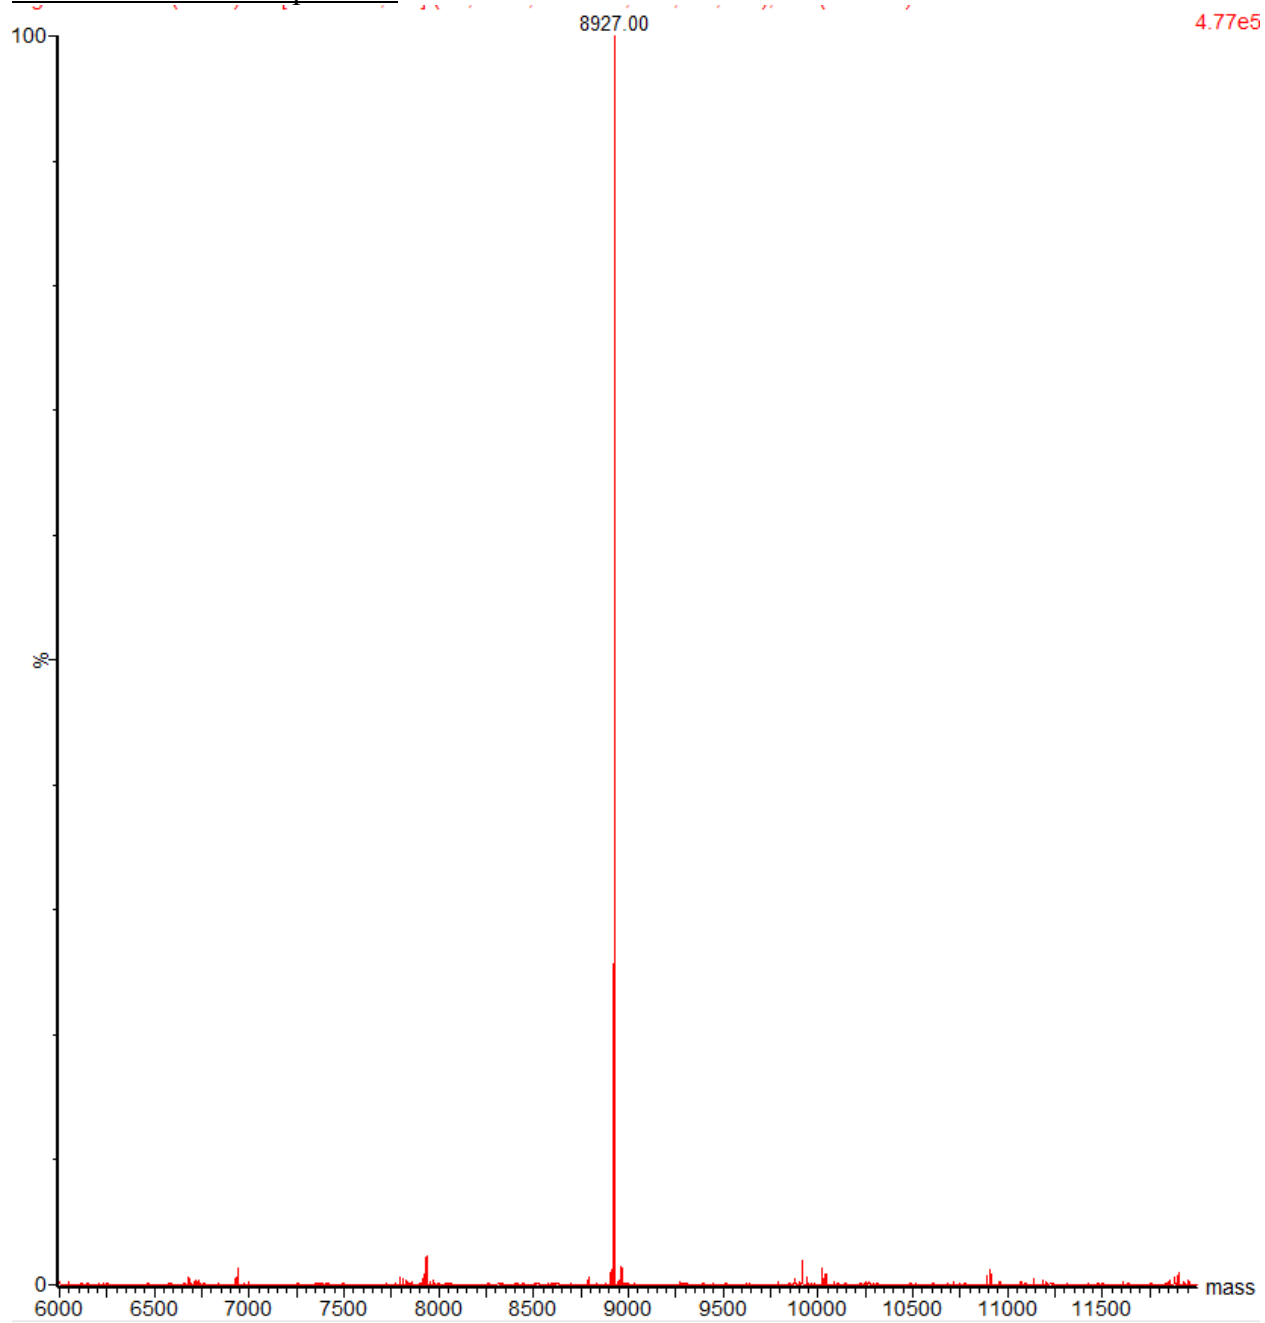





# Mass Spectrum

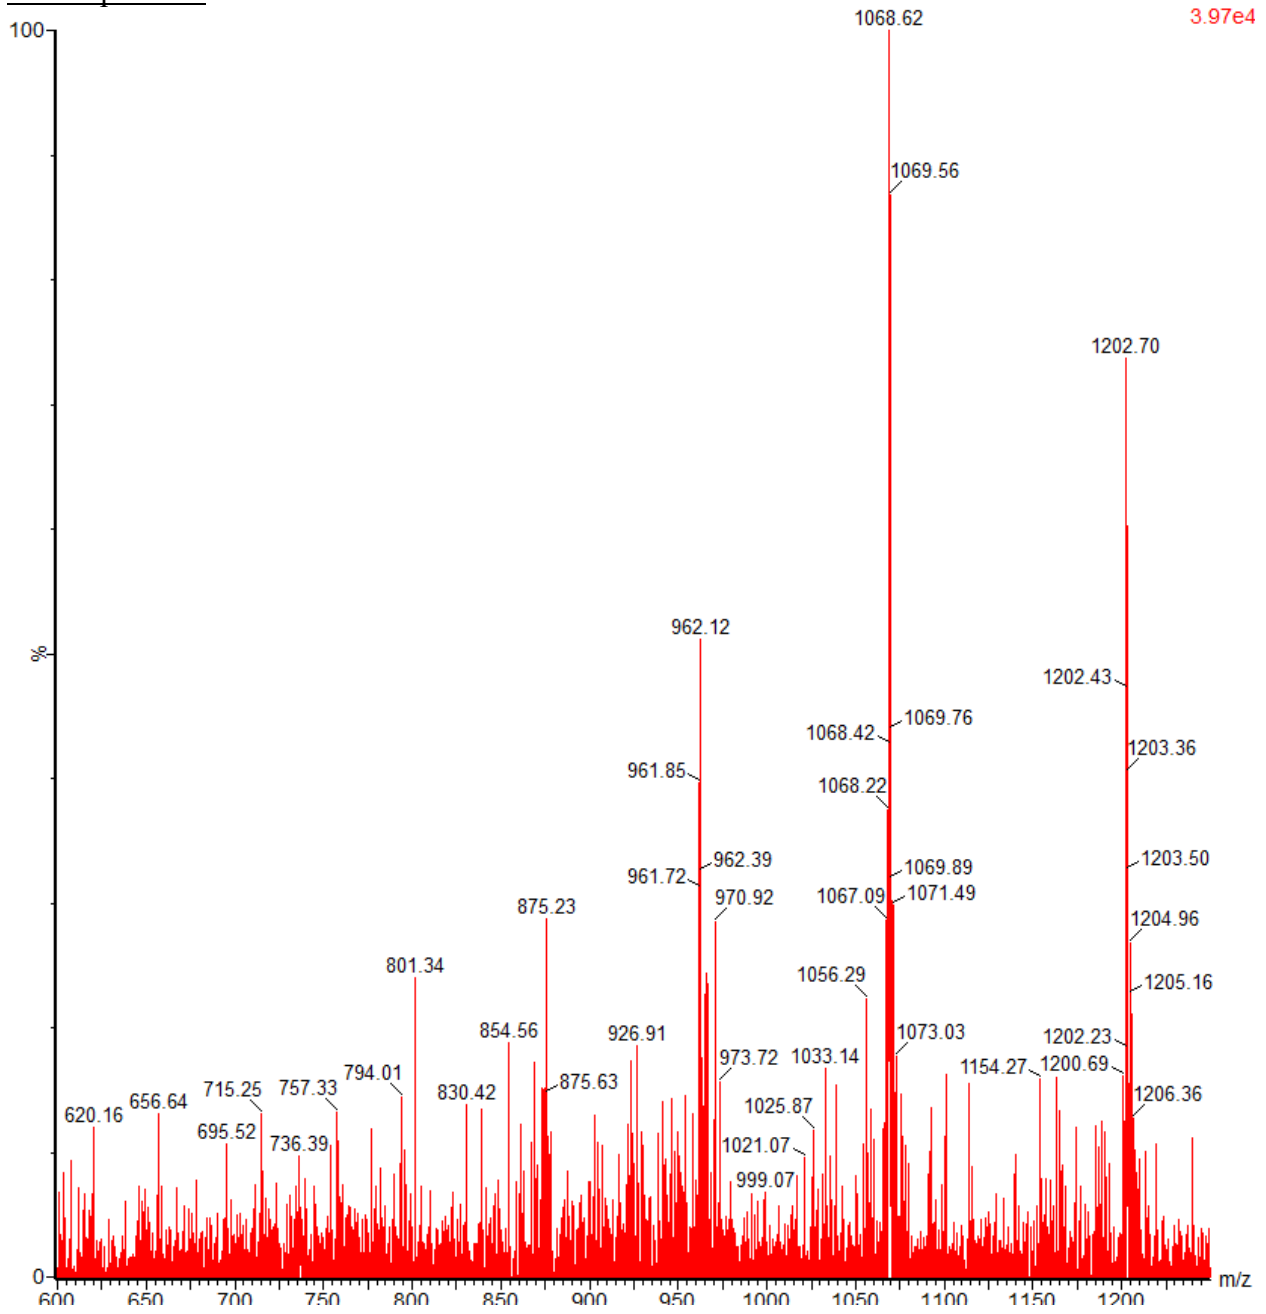

# Deconvoluted Mass Spectrum

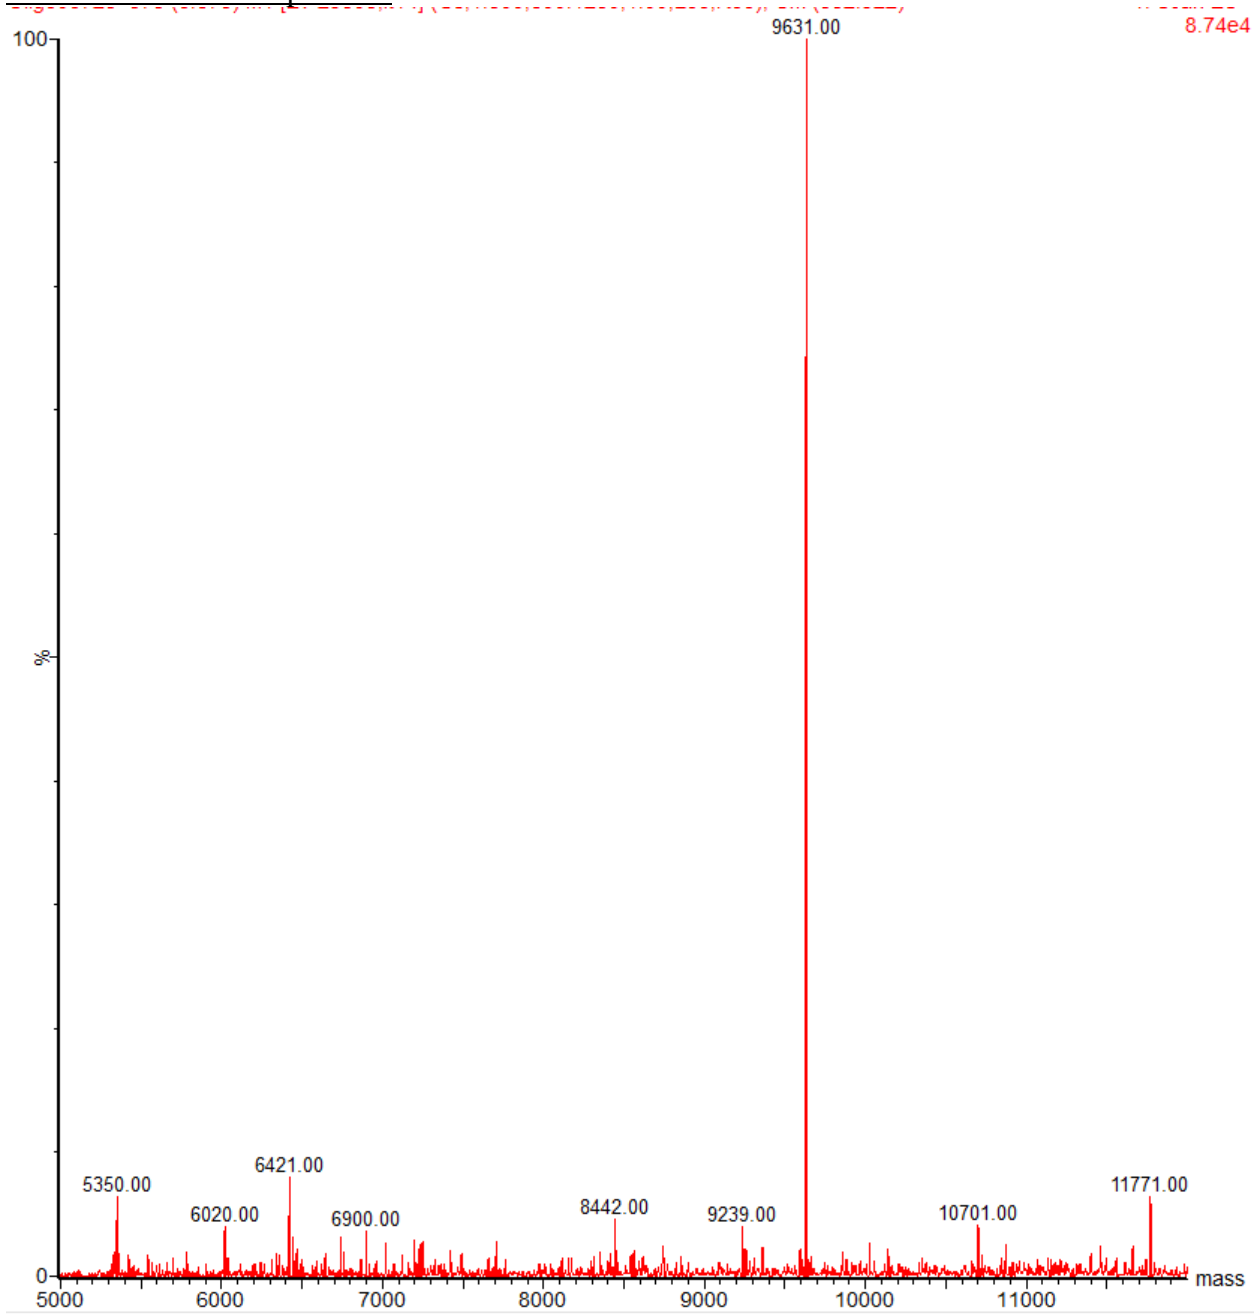

---

### **Process for Mass Fragmentation of 68**

A crude solution of **68** in water (100  $\mu\text{M}$ ) was injected on the Waters I-Class ToF for peak identification. The MS cone voltage was then increased from 5 mV to 30 mV and the same sample was reinjected to fragment the modified oligonucleotide. Diagnostic fragments were then extracted, and their presence confirmed on the total ion current. They are plotted below along with total ion current.

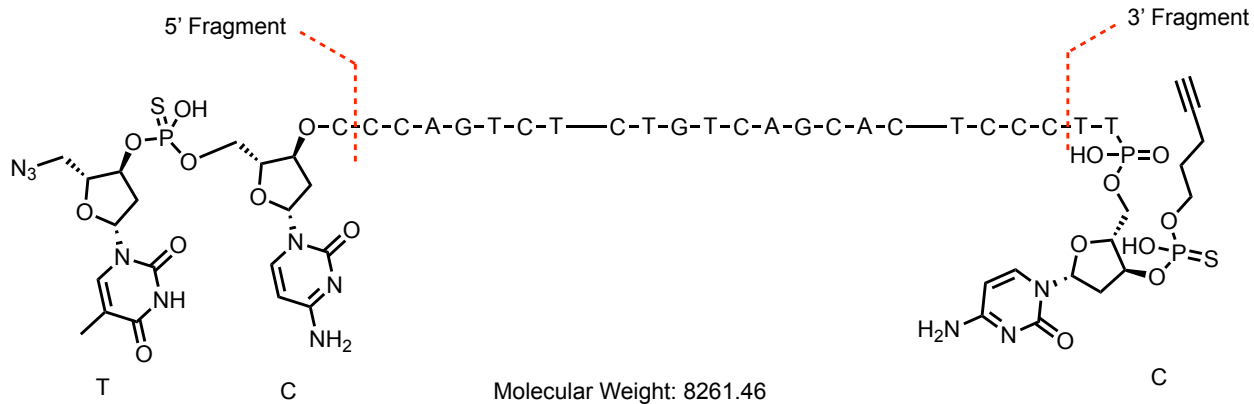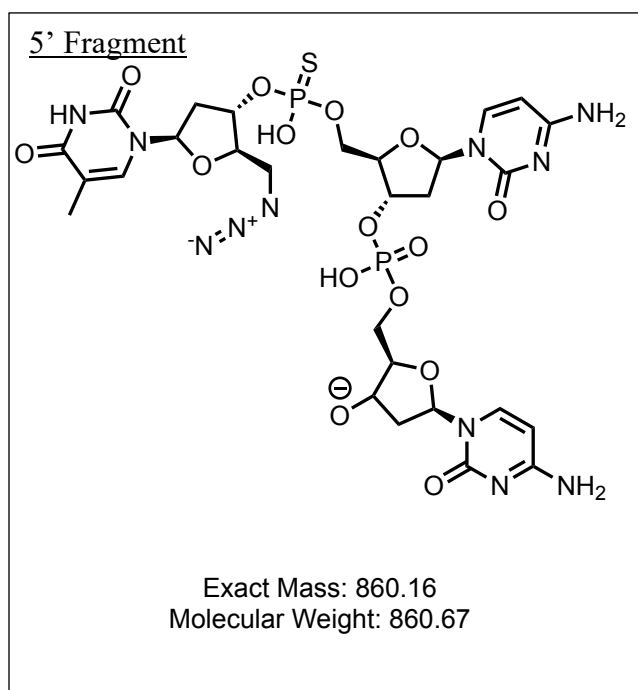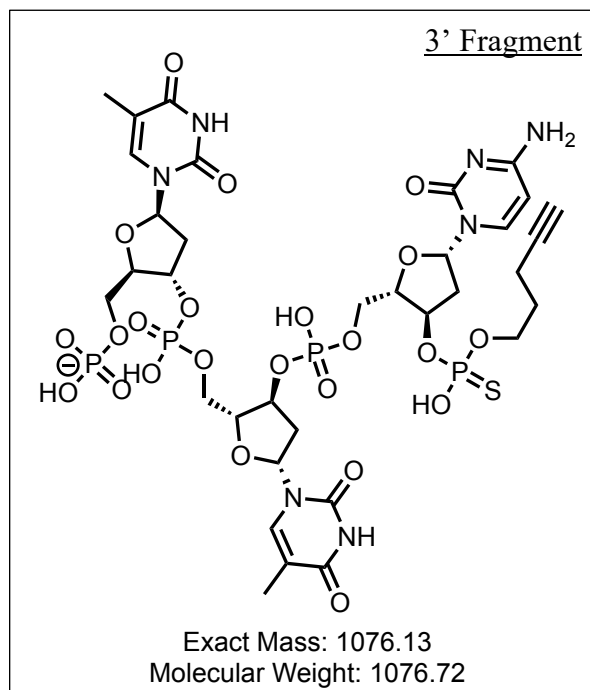

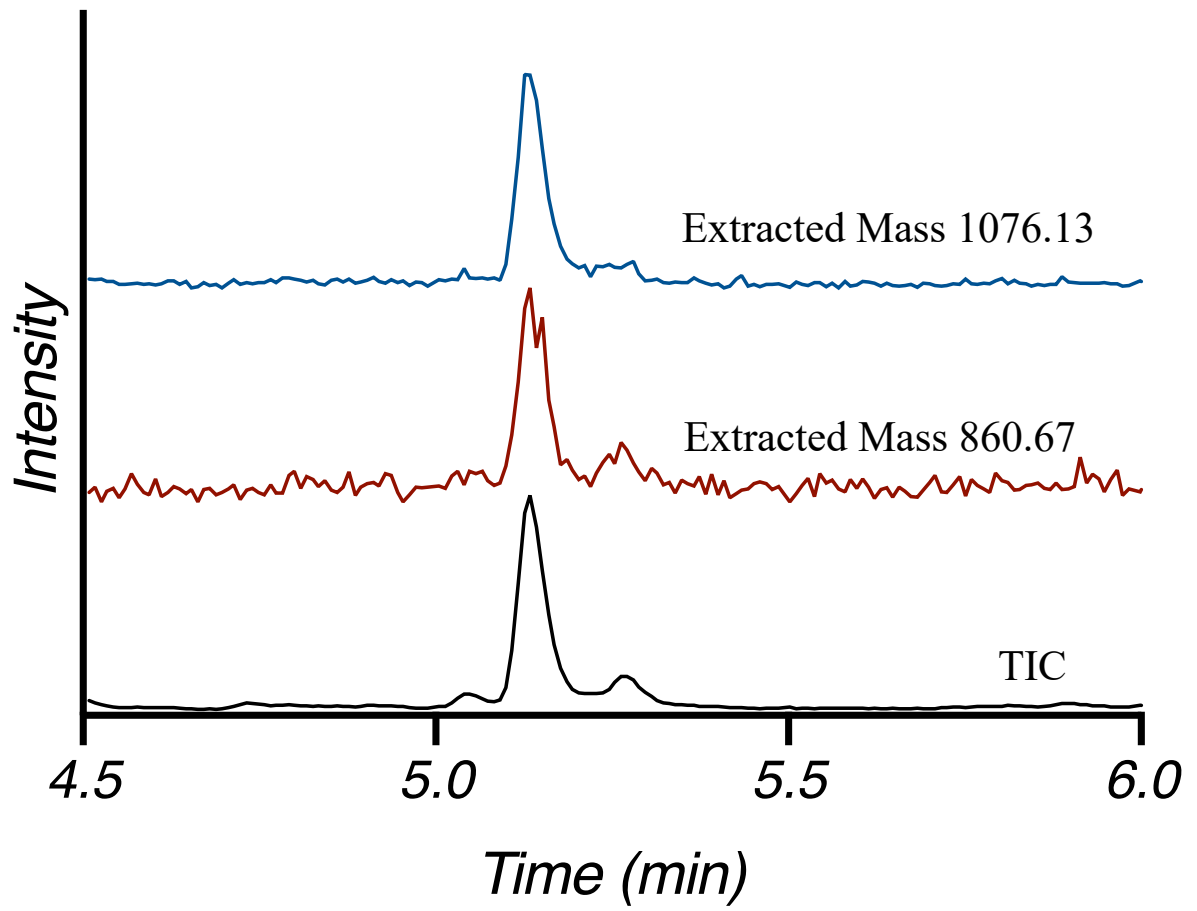

---

---

### **nCov Probe Production**

Probes were produced in an analogous manner to procedure outlined above for the production of **68**.

---

### LCMS Characterization of SI-43

Produced from **SI-13** by General Procedure **3**:

Using **Ψ-5**

Expected Mass: 7546.89

Expected (M-8)/8 Ion: 942.4

Found Deconvoluted Mass: 7546

Found (M-8)/8 Ion: 942.05

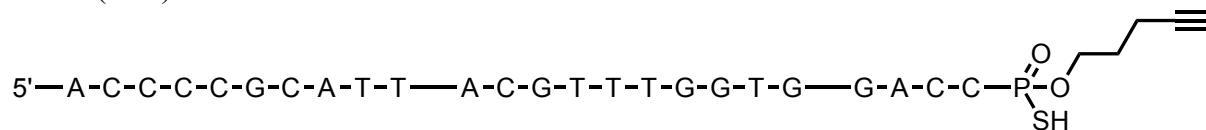

Molecular Weight: 7546.89

### A260 Chromatogram

Oligo03662

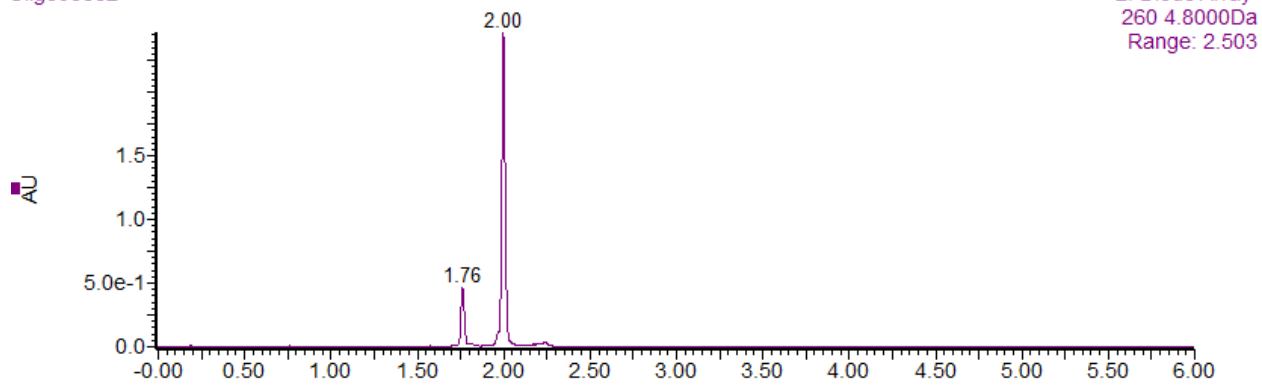

Mass Spectrum (RT= 2.00 min)

2.96e6

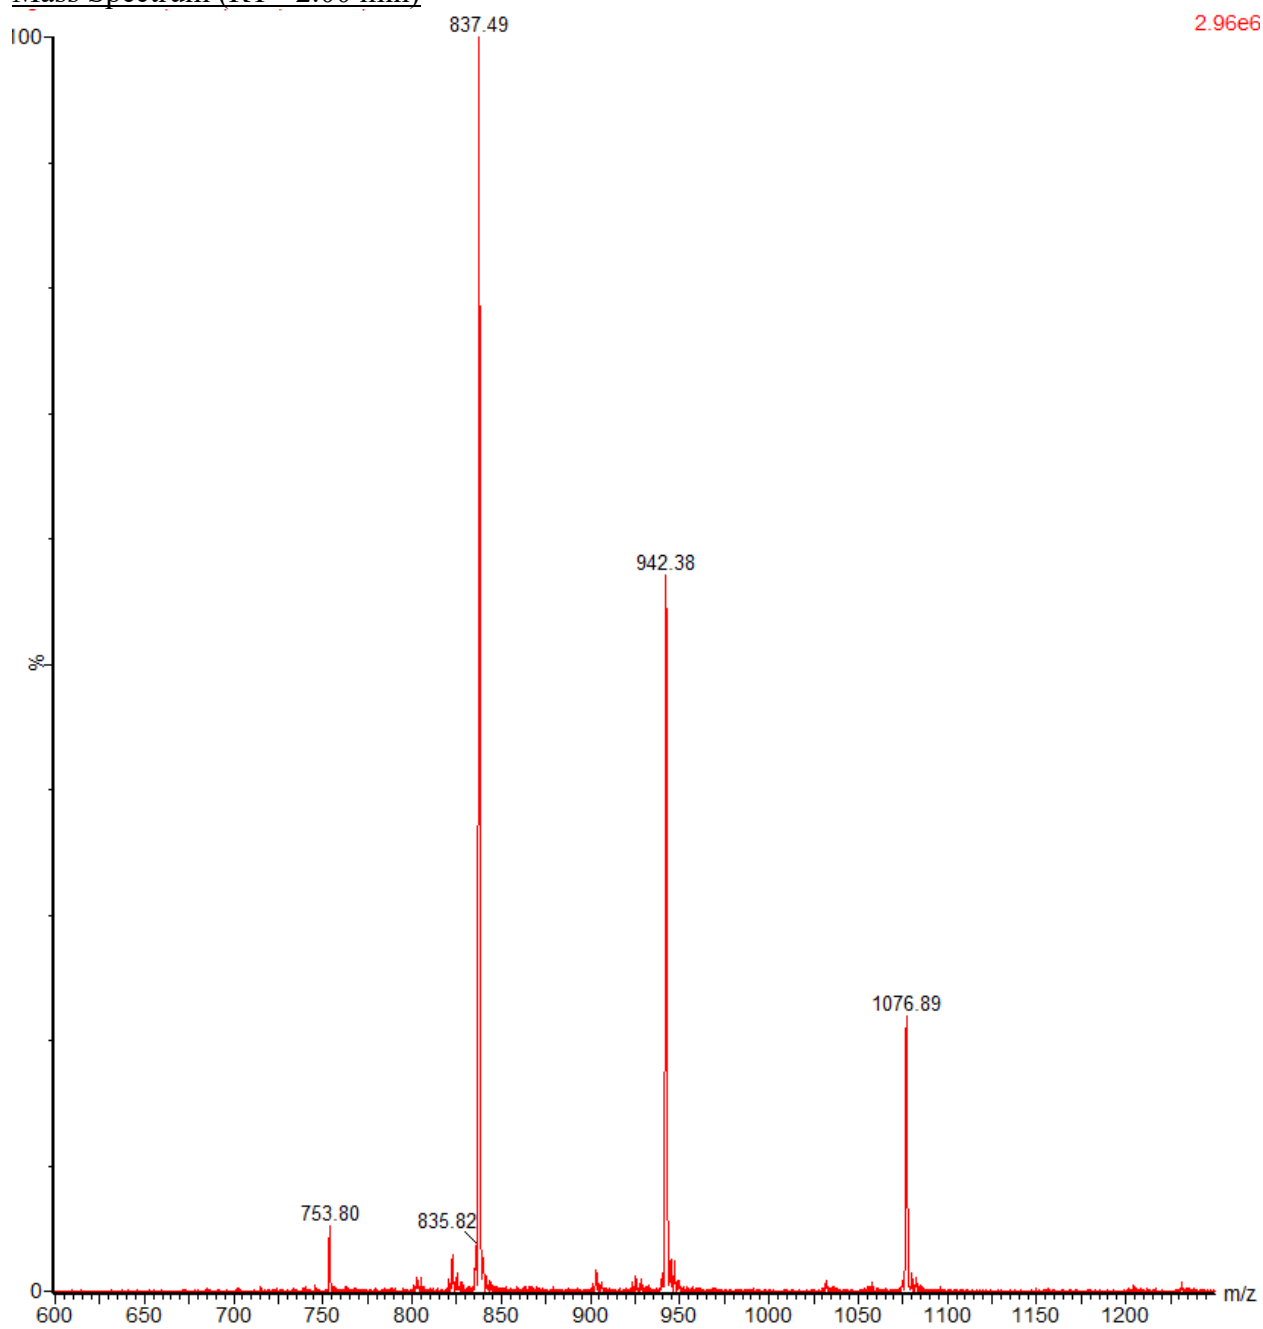



Deconvoluted Mass Spectrum

1.77e7

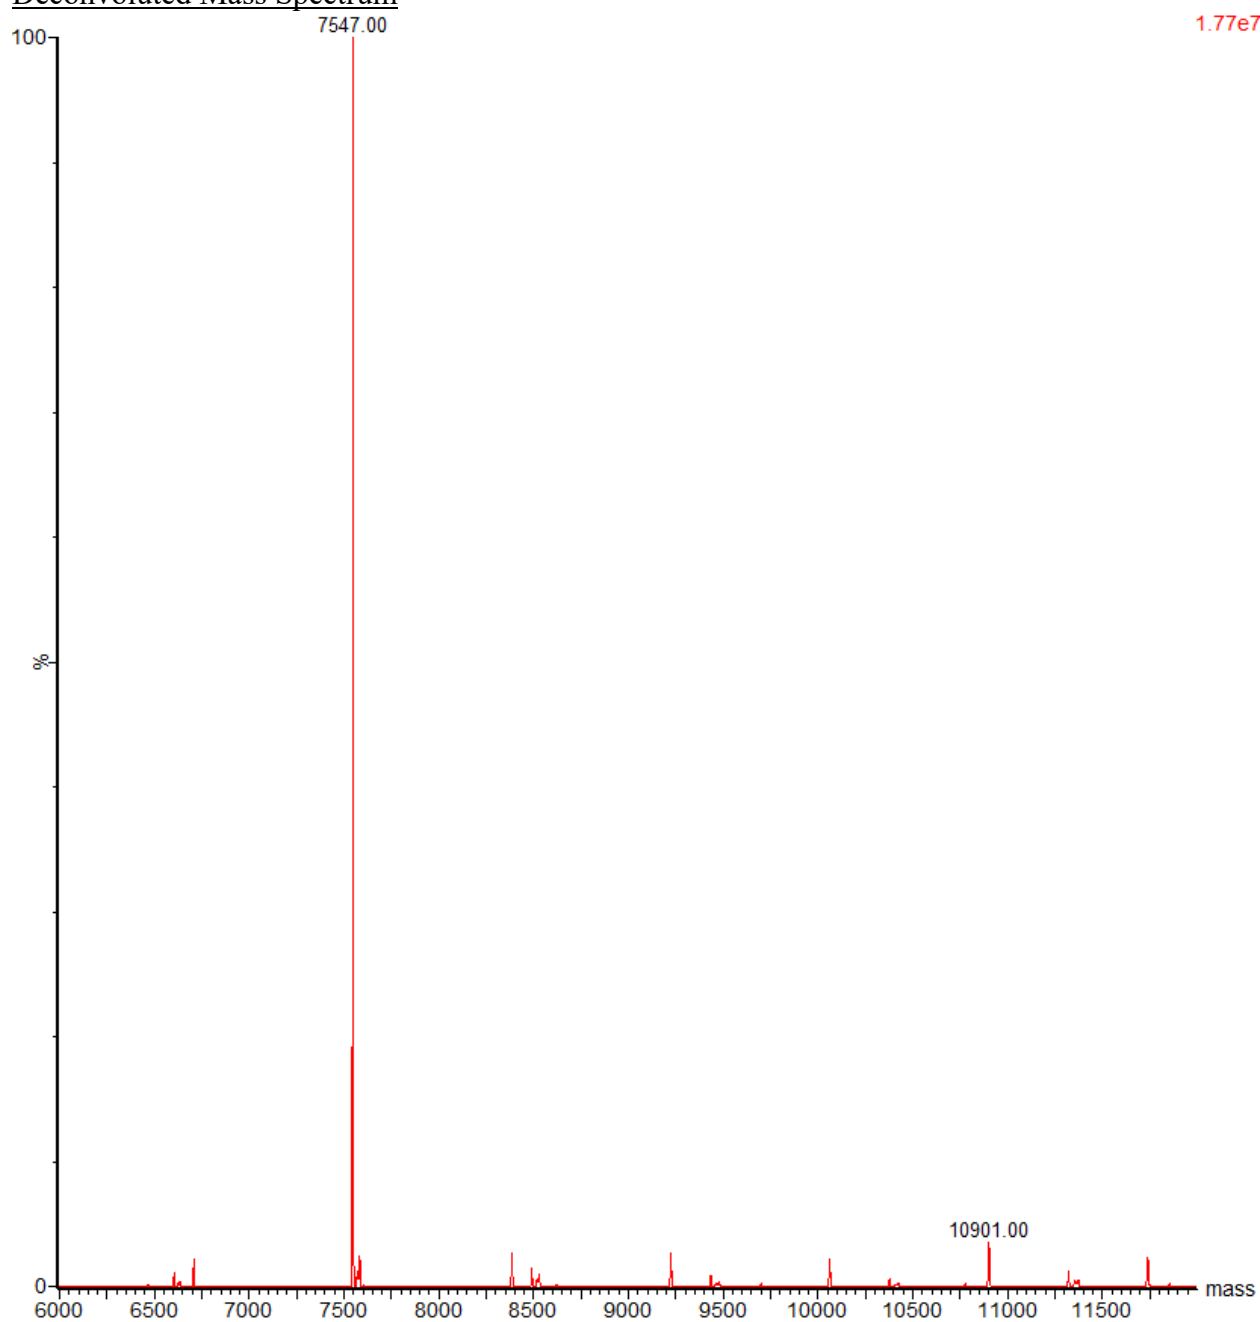

---

### LCMS Characterization of SI-44

Produced from **SI-43** by rSAP and EXOIII:

Expected Mass: 7466.91

Expected (M-8)/8 Ion: 932.4

Found Deconvoluted Mass: 7467.00

Found (M-8)/8 Ion: 932.5

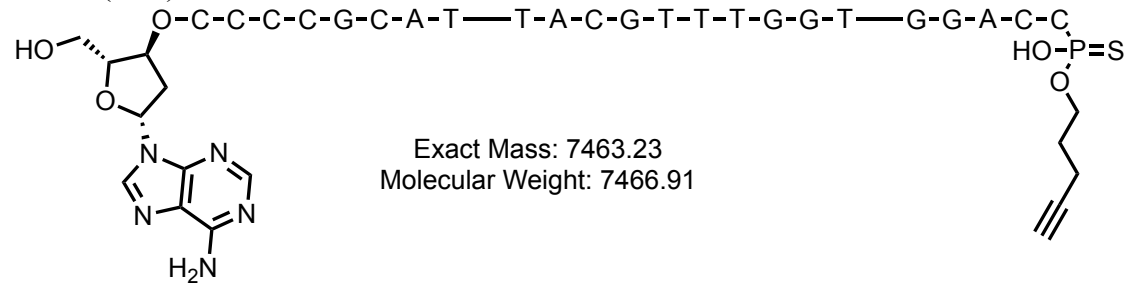

### A260 Chromatogram

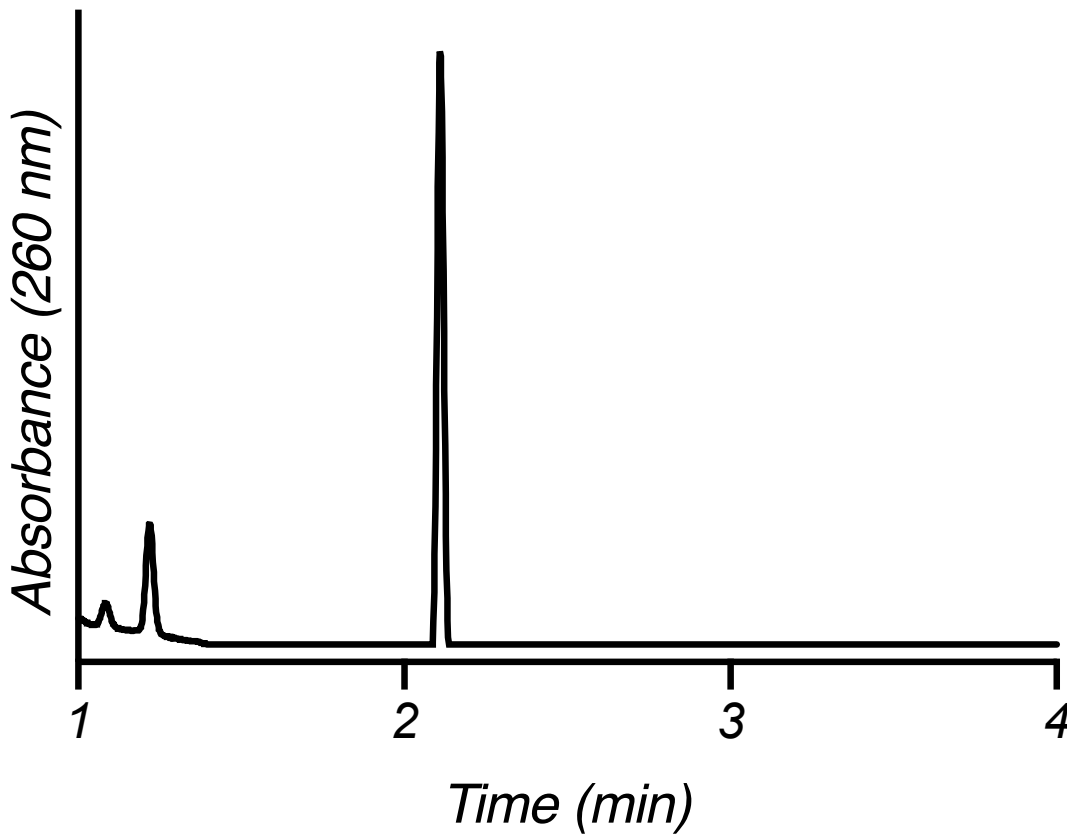

Mass Spectrum (RT= 1.96 min)

1.32e5

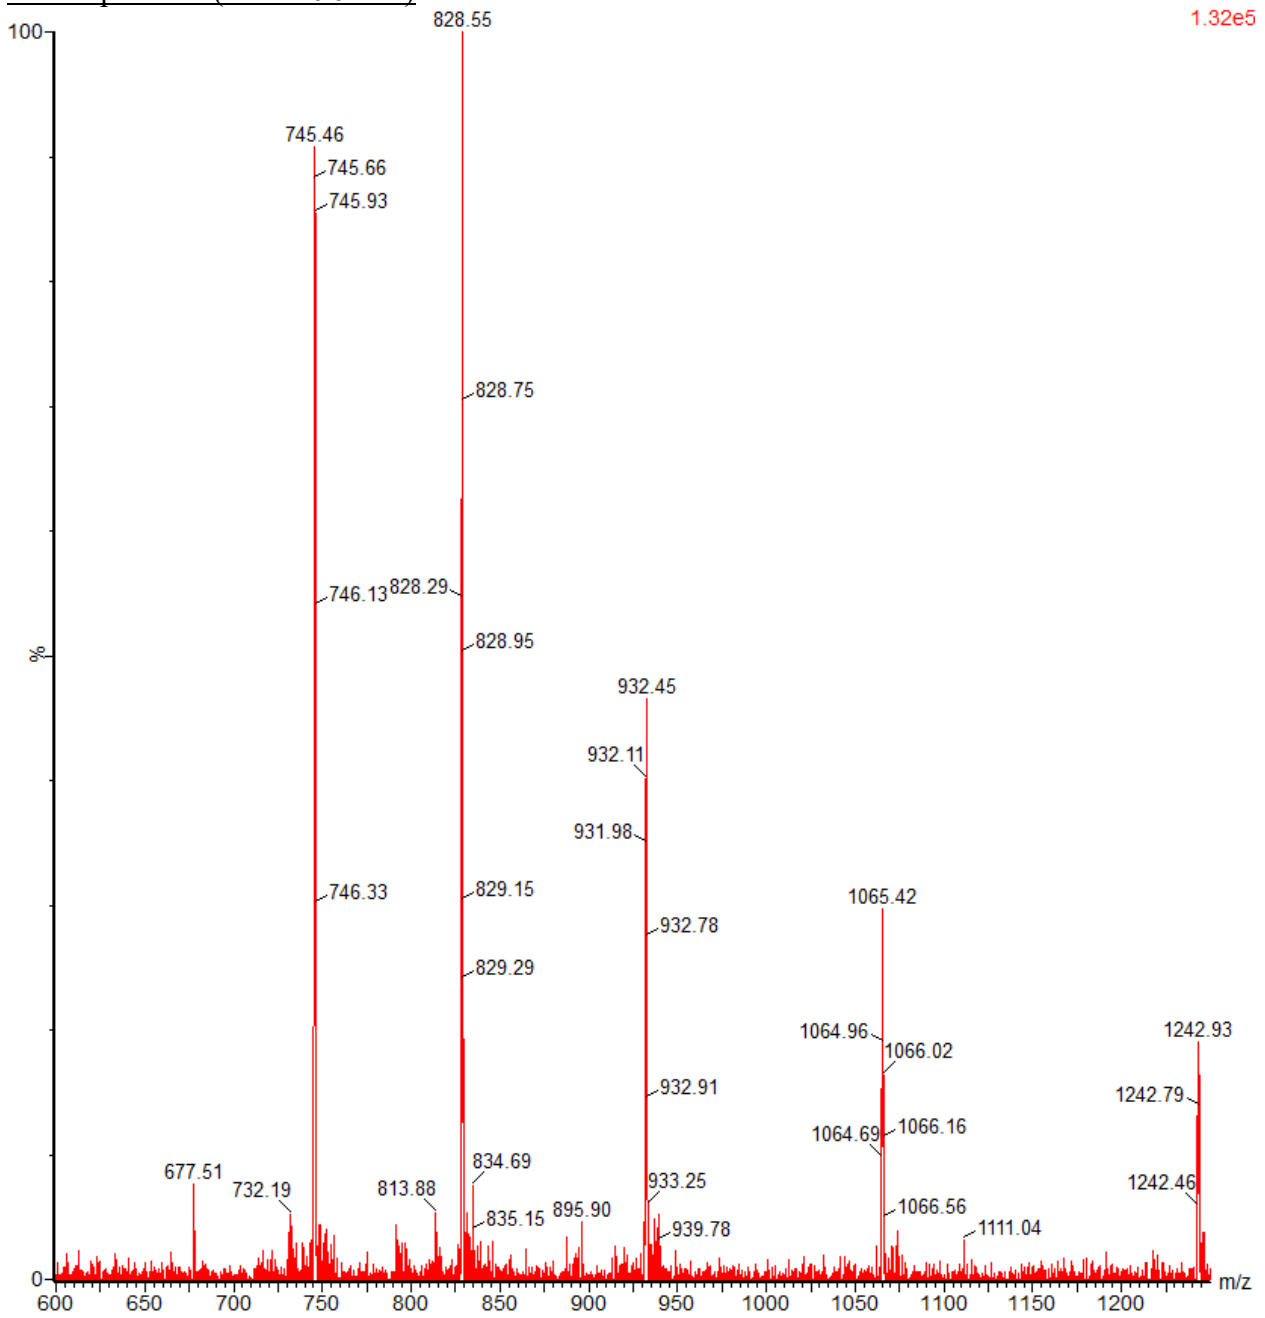

Deconvoluted Mass Spectrum

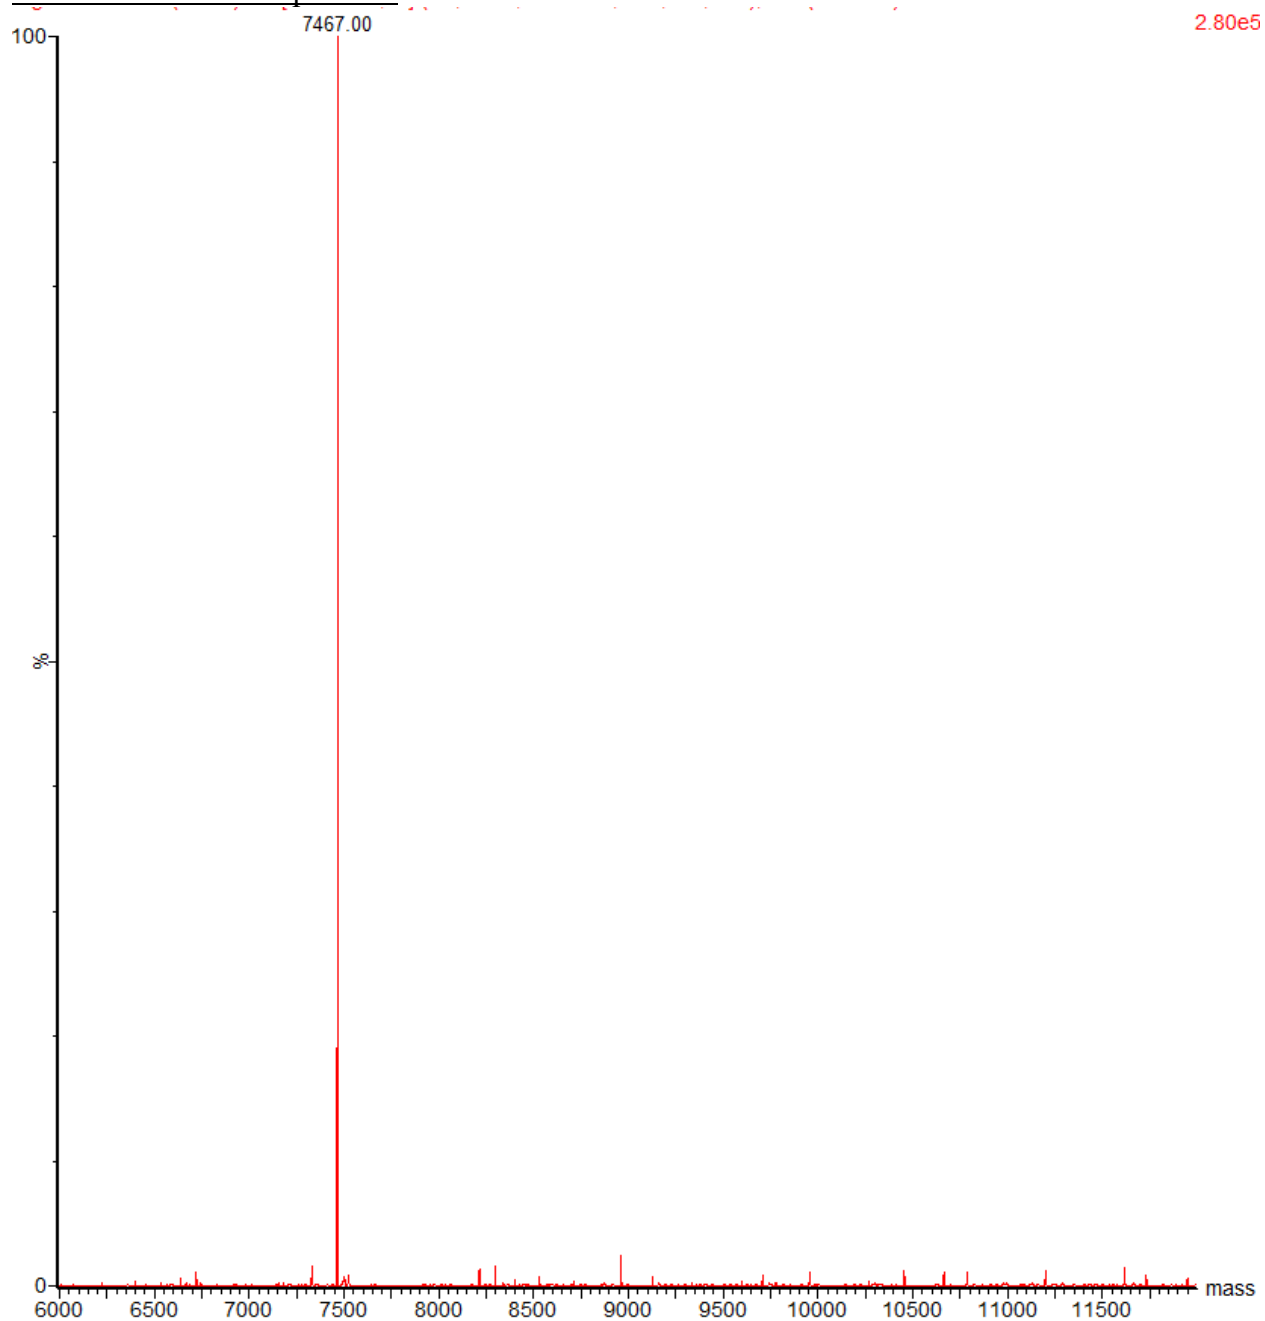

---

LCMS Characterization of **70** after SENDR with **Ψ-17** and Lambda Exo Cleanup

Produced from **SI-44**:

Using **Ψ-17**

Expected Mass: 7812.2

Expected (M-6)/6 Ion: 975.525

Found Deconvoluted Mass: 7813.0

Found (M-6)/6 Ion: 975.4

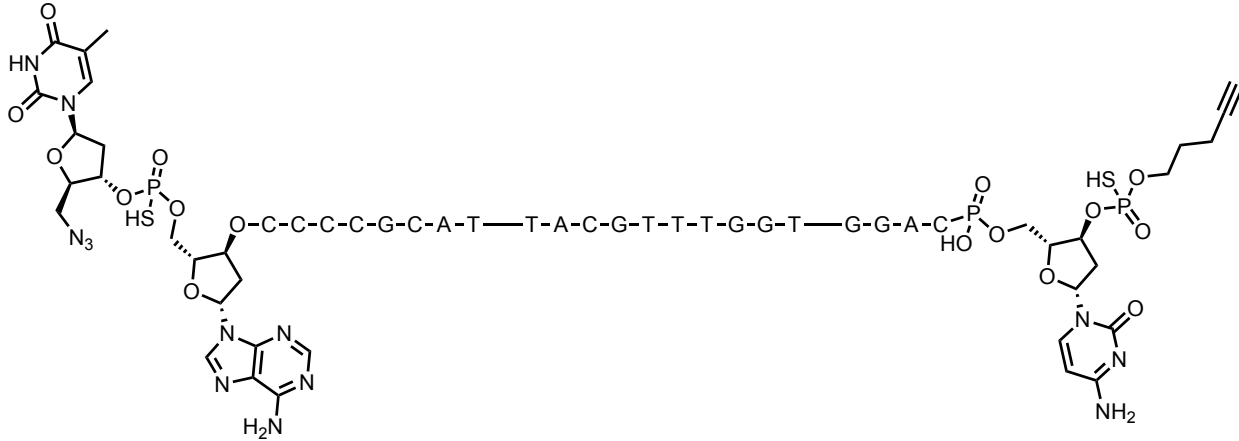

Molecular Weight: 7812.18

A260 Chromatogram

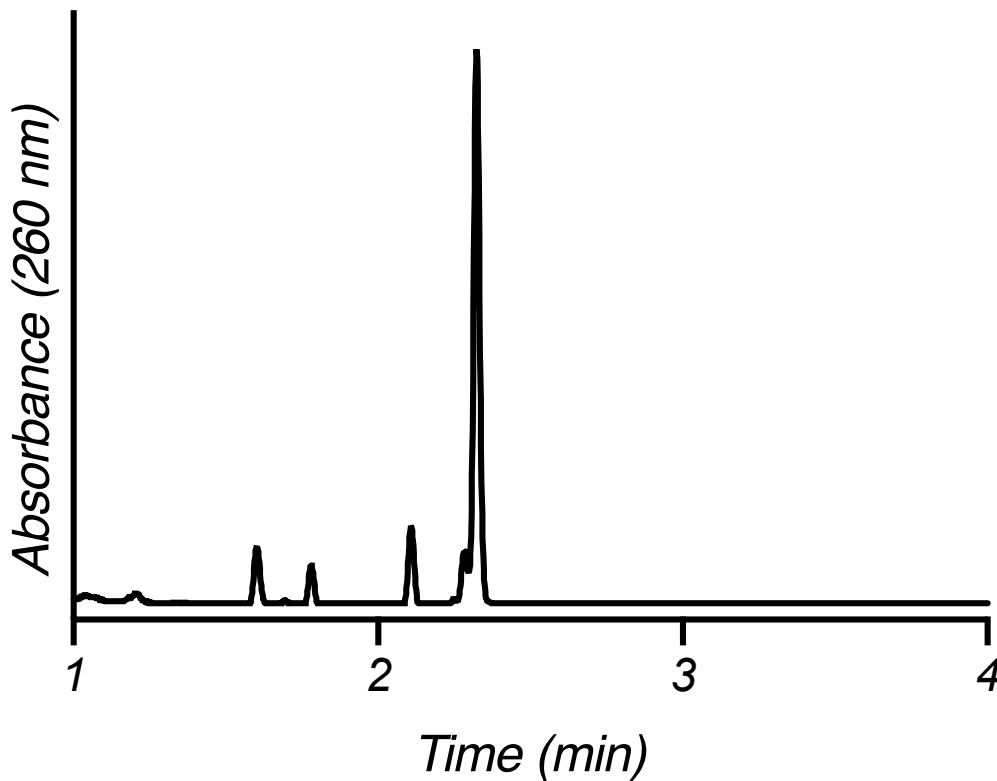

Mass Spectrum (RT= 5.37 min)

1.11e5

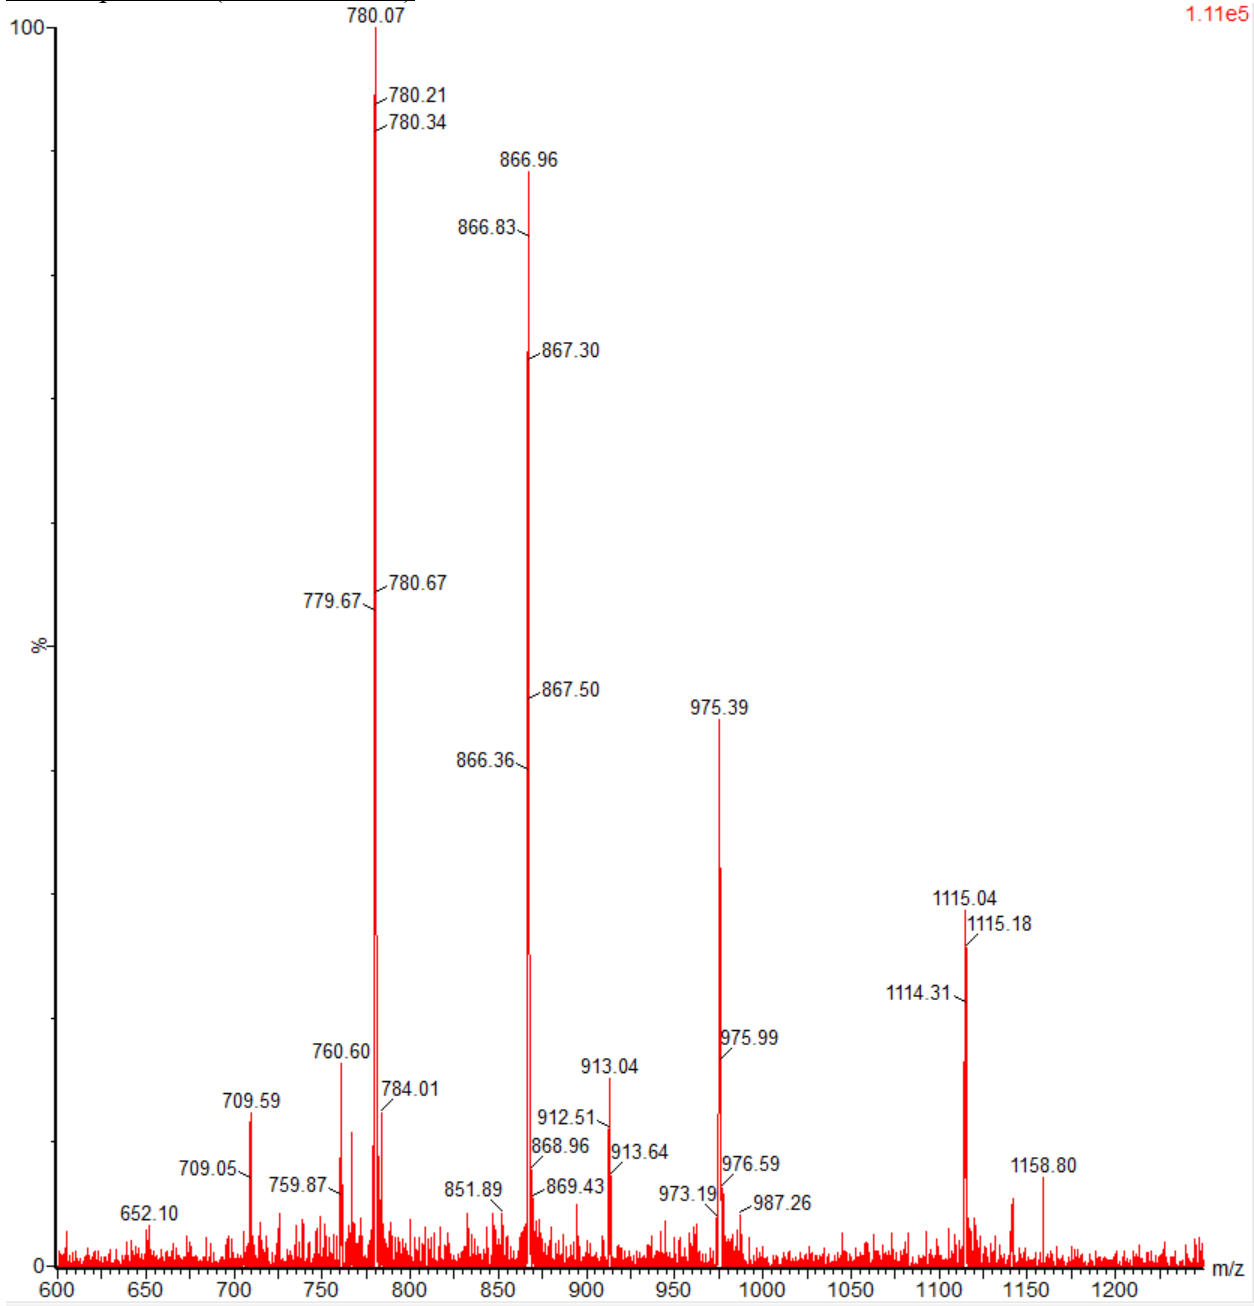

Deconvoluted Mass Spectrum

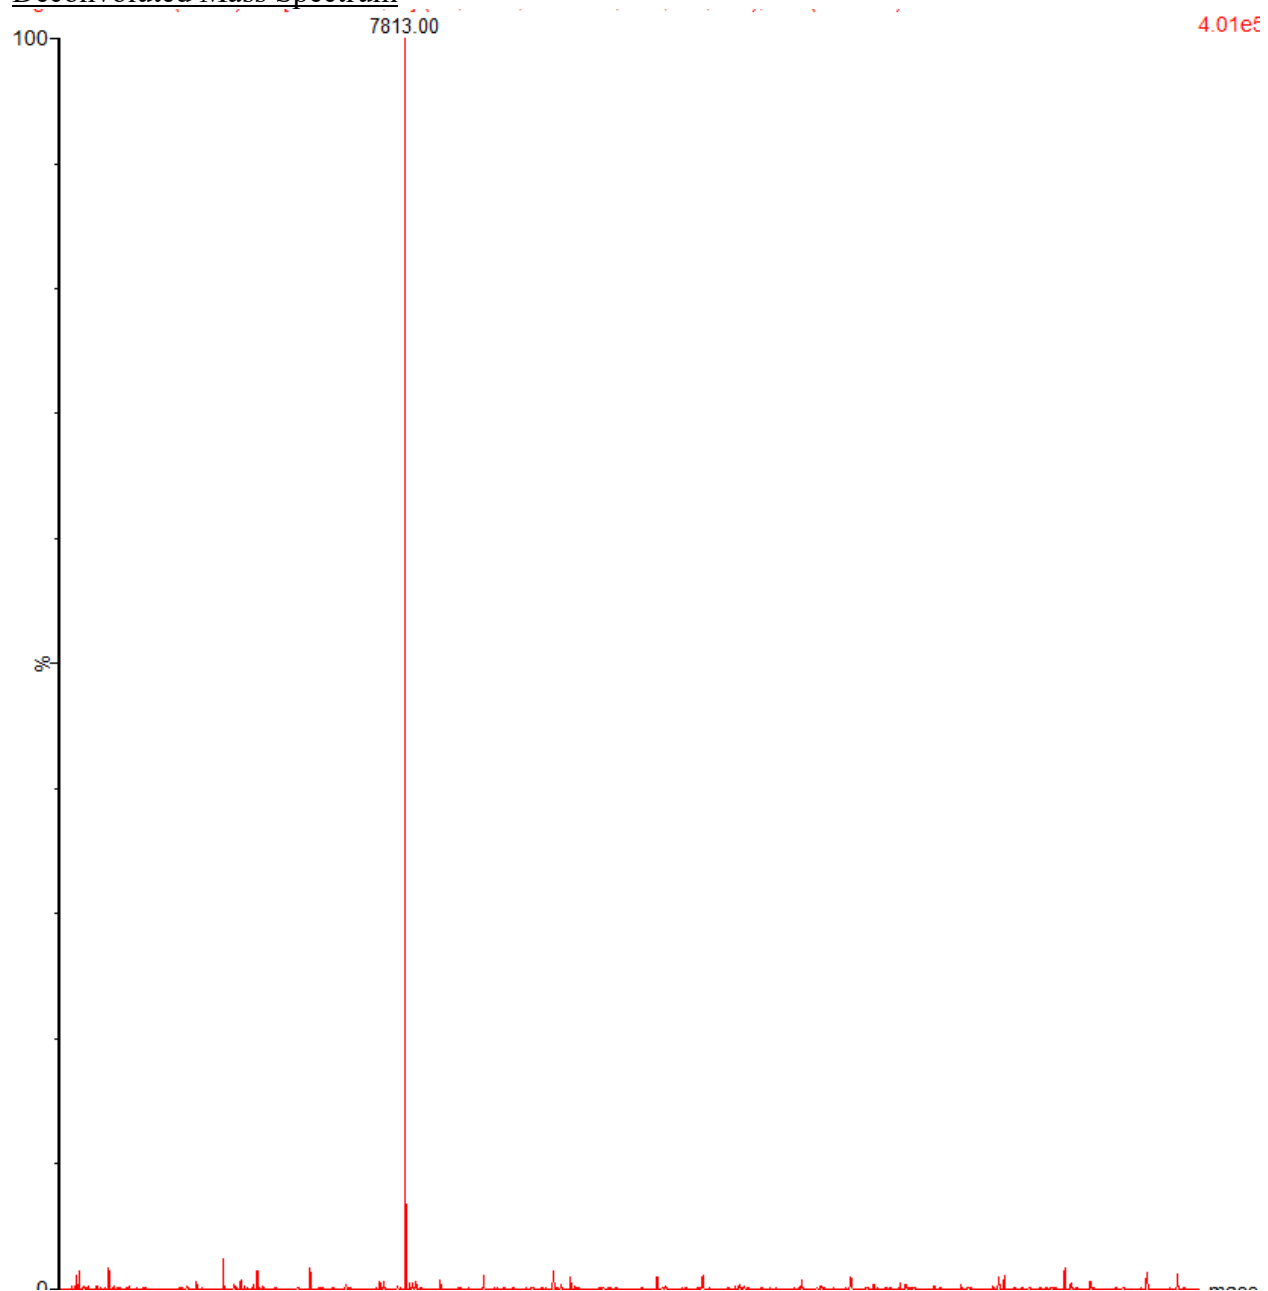

---

## LCMS Characterization of SI-45

Produced from SI-14:

Using  $\Psi$ -5

Expected Mass: 7186.67

Expected (M-8)/8 Ion: 897.33

Found Deconvoluted Mass: 7186.00

Found (M-8)/8 Ion: 897.17

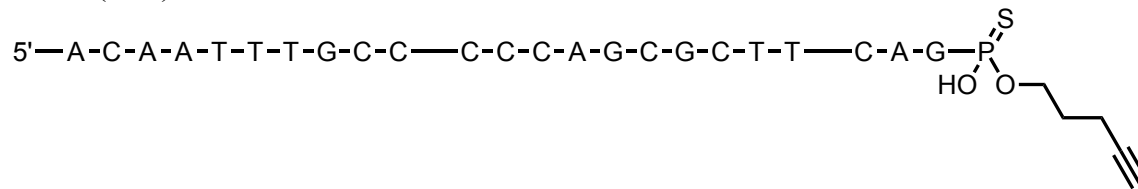

Exact Mass: 7183.15  
Molecular Weight: 7186.67

### A260 Chromatogram

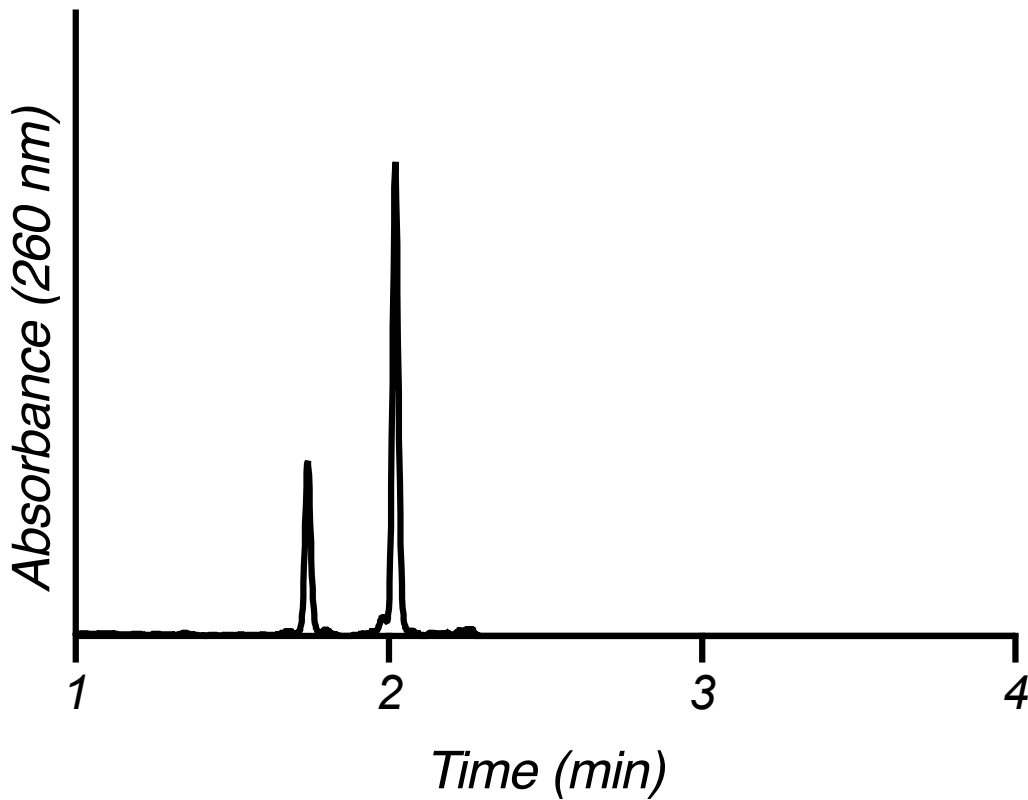



Mass Spectrum (RT= 2.00 min)

9.27e5

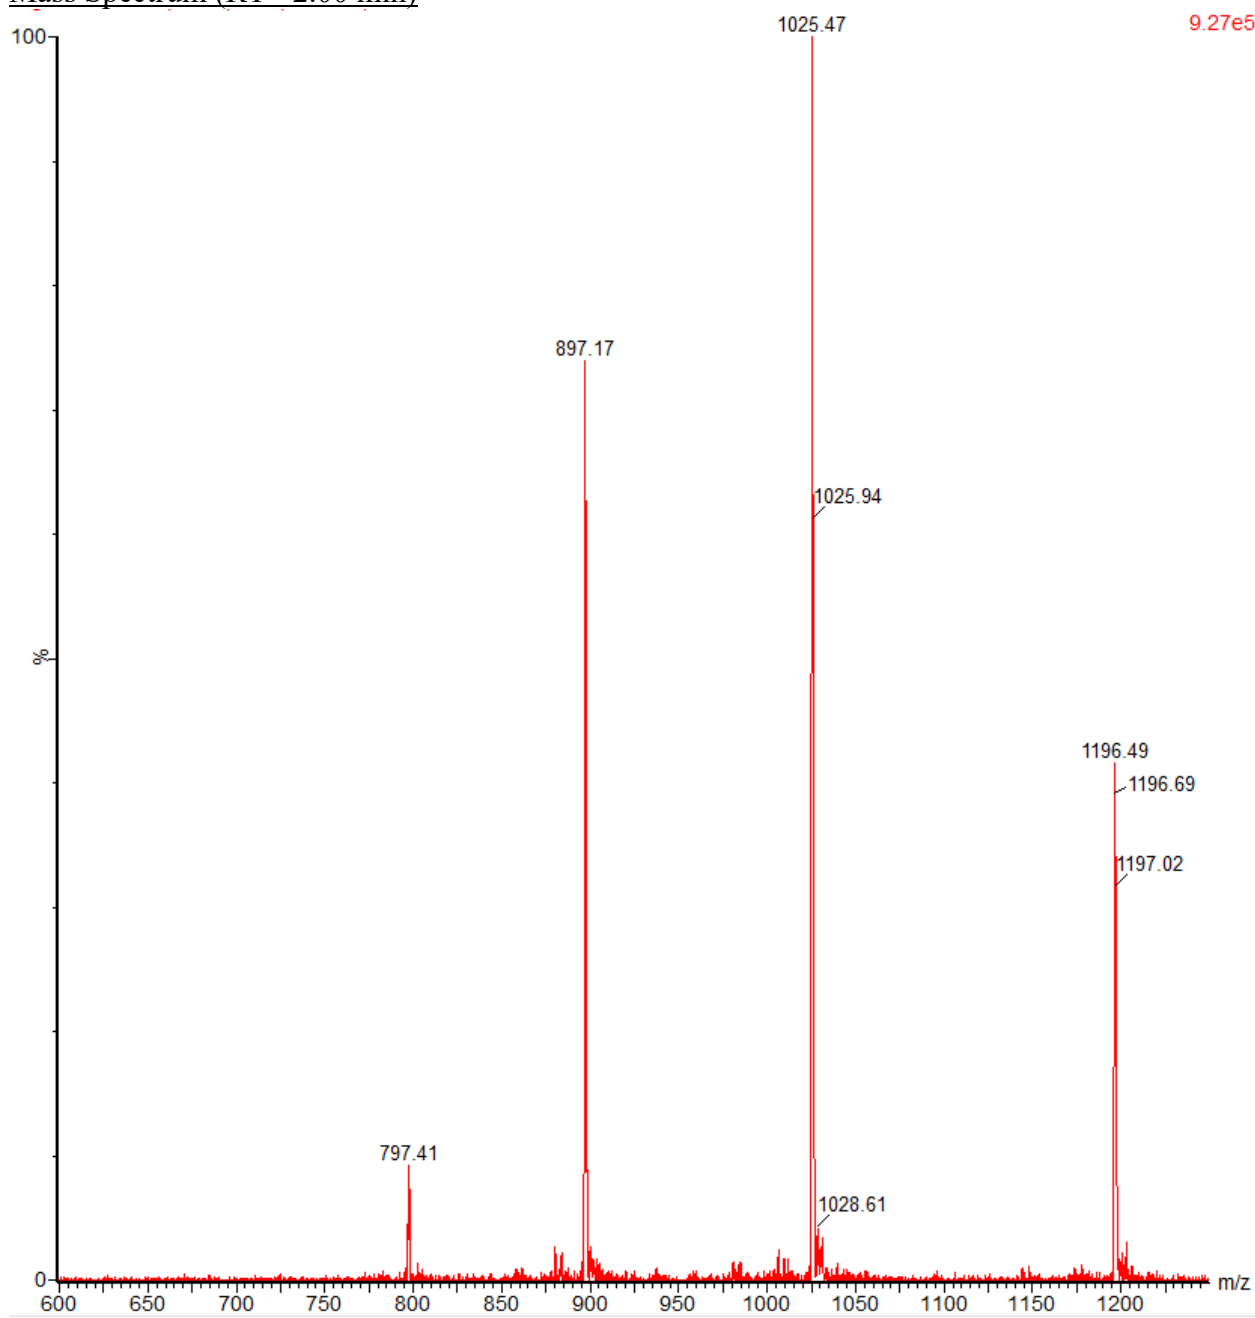

Deconvoluted Mass Spectrum

4.24e8

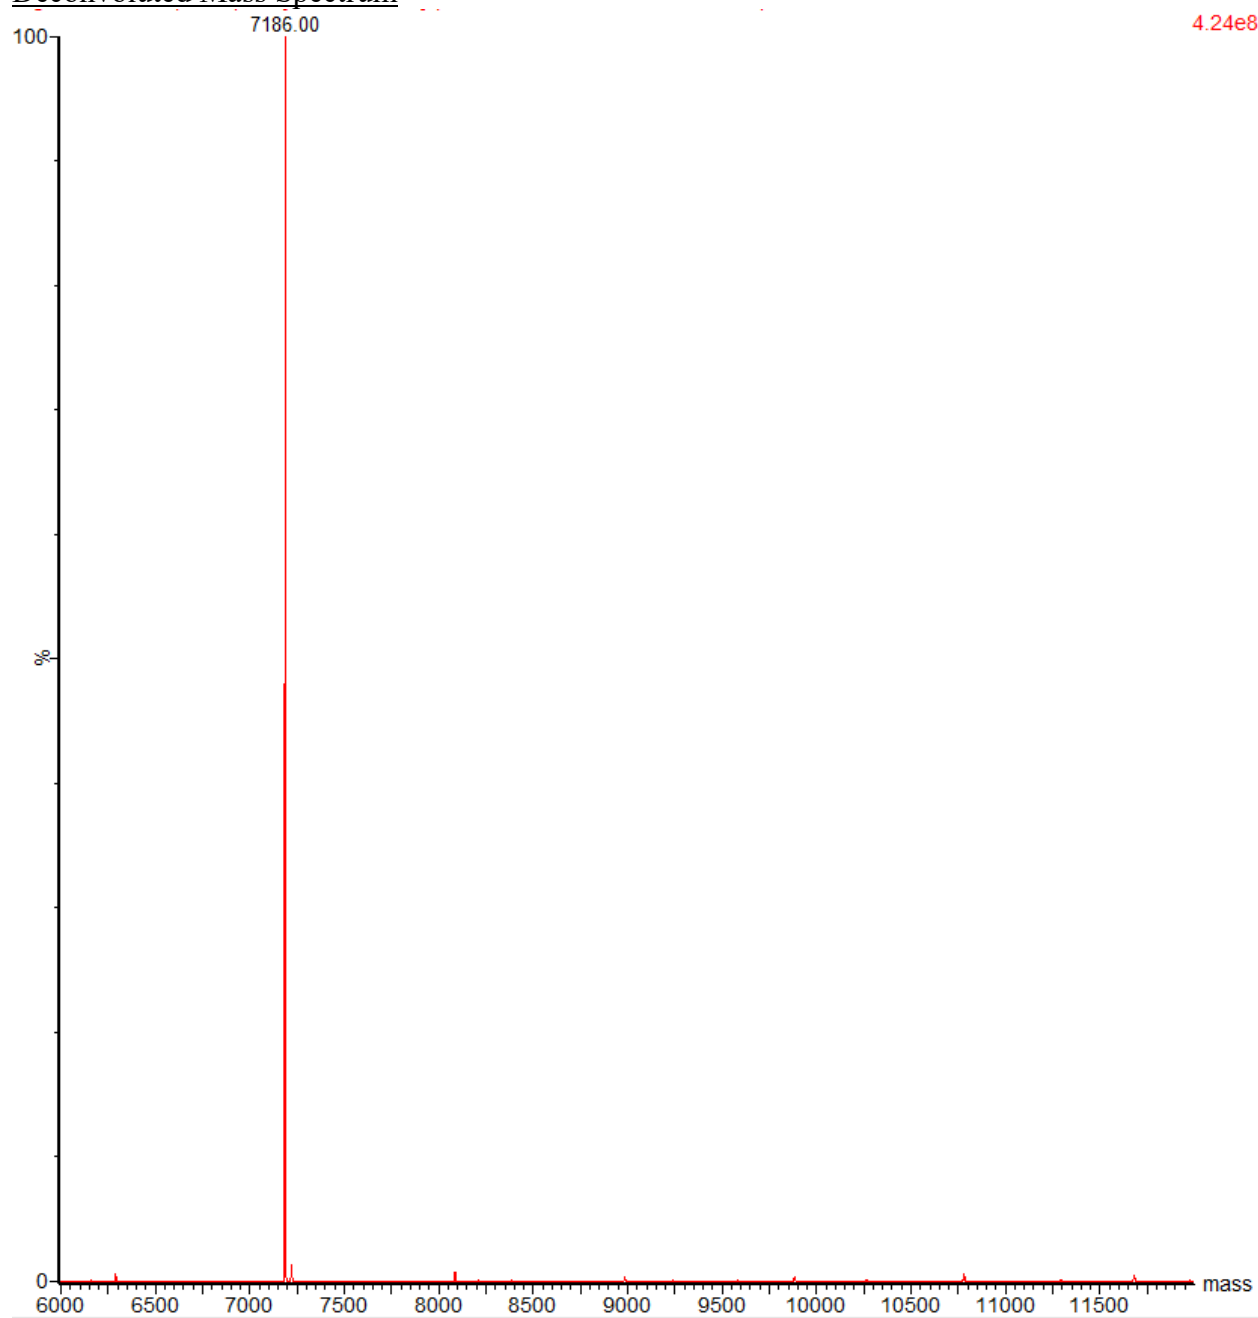

---

### LCMS Characterization of SI-46

Produced from **SI-45** by rSAP:

Expected Mass: 7106.69

Expected (M-8)/8 Ion: 887.33

Found Deconvoluted Mass: 886.97

Found (M-8)/8 Ion: 7107.00

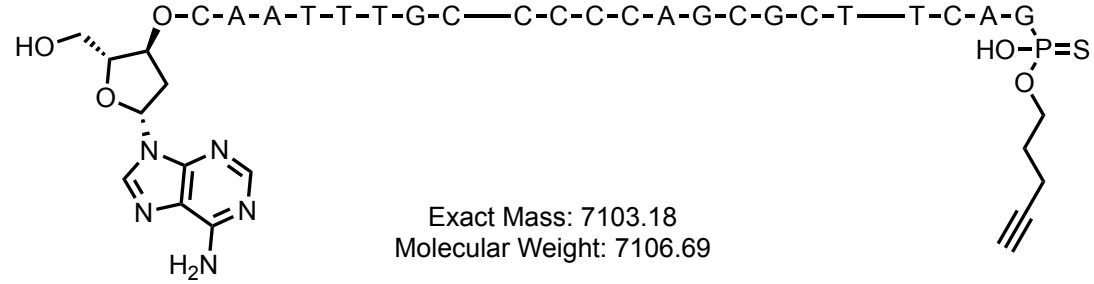

A260 Chromatogram

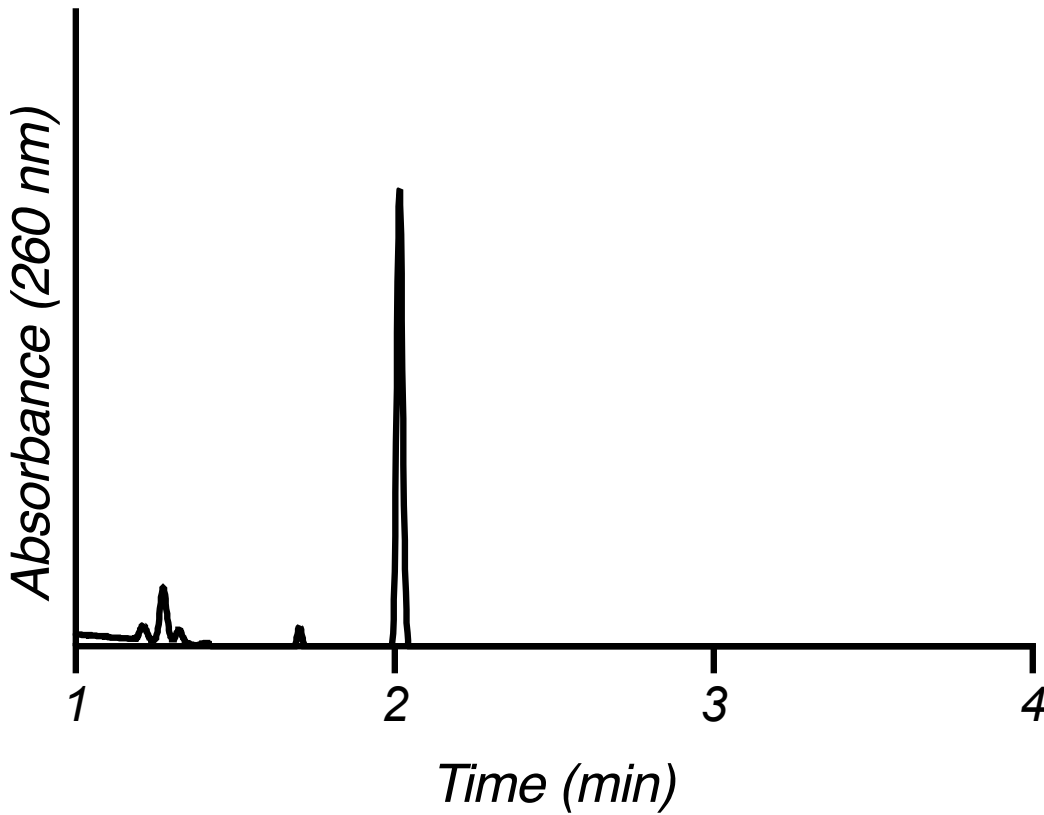

Mass Spectrum (RT= 1.97 min)

1.32e5

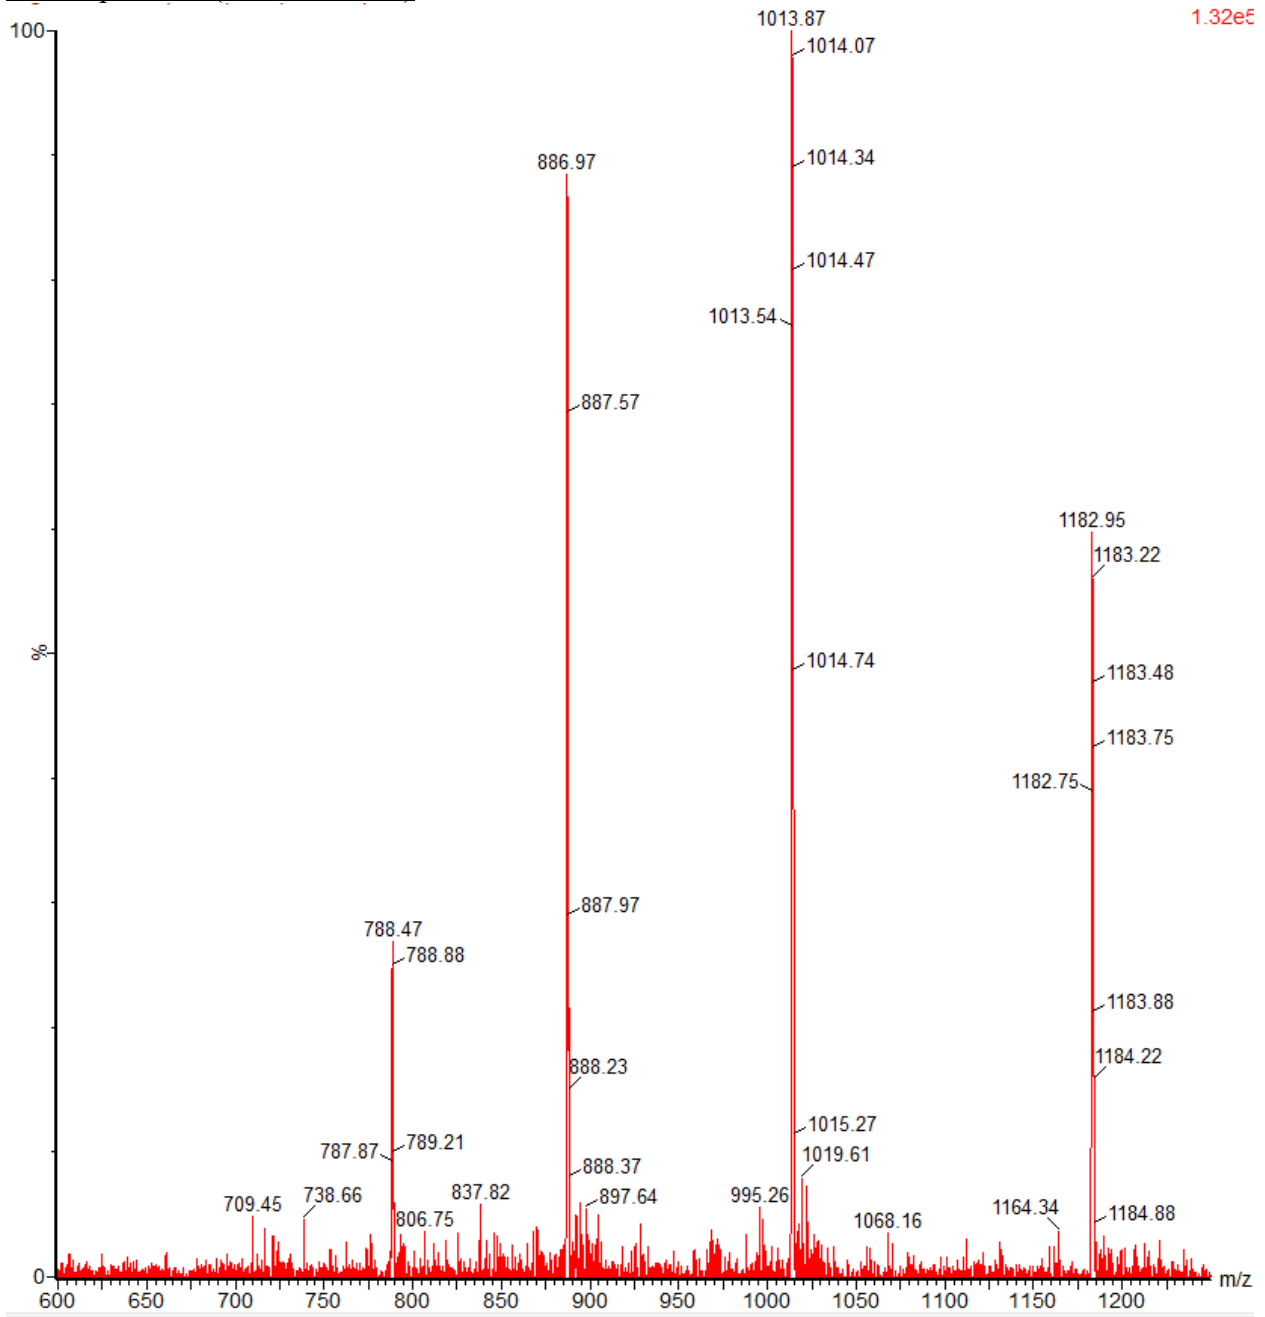

# Deconvoluted Mass Spectrum

9.09e5

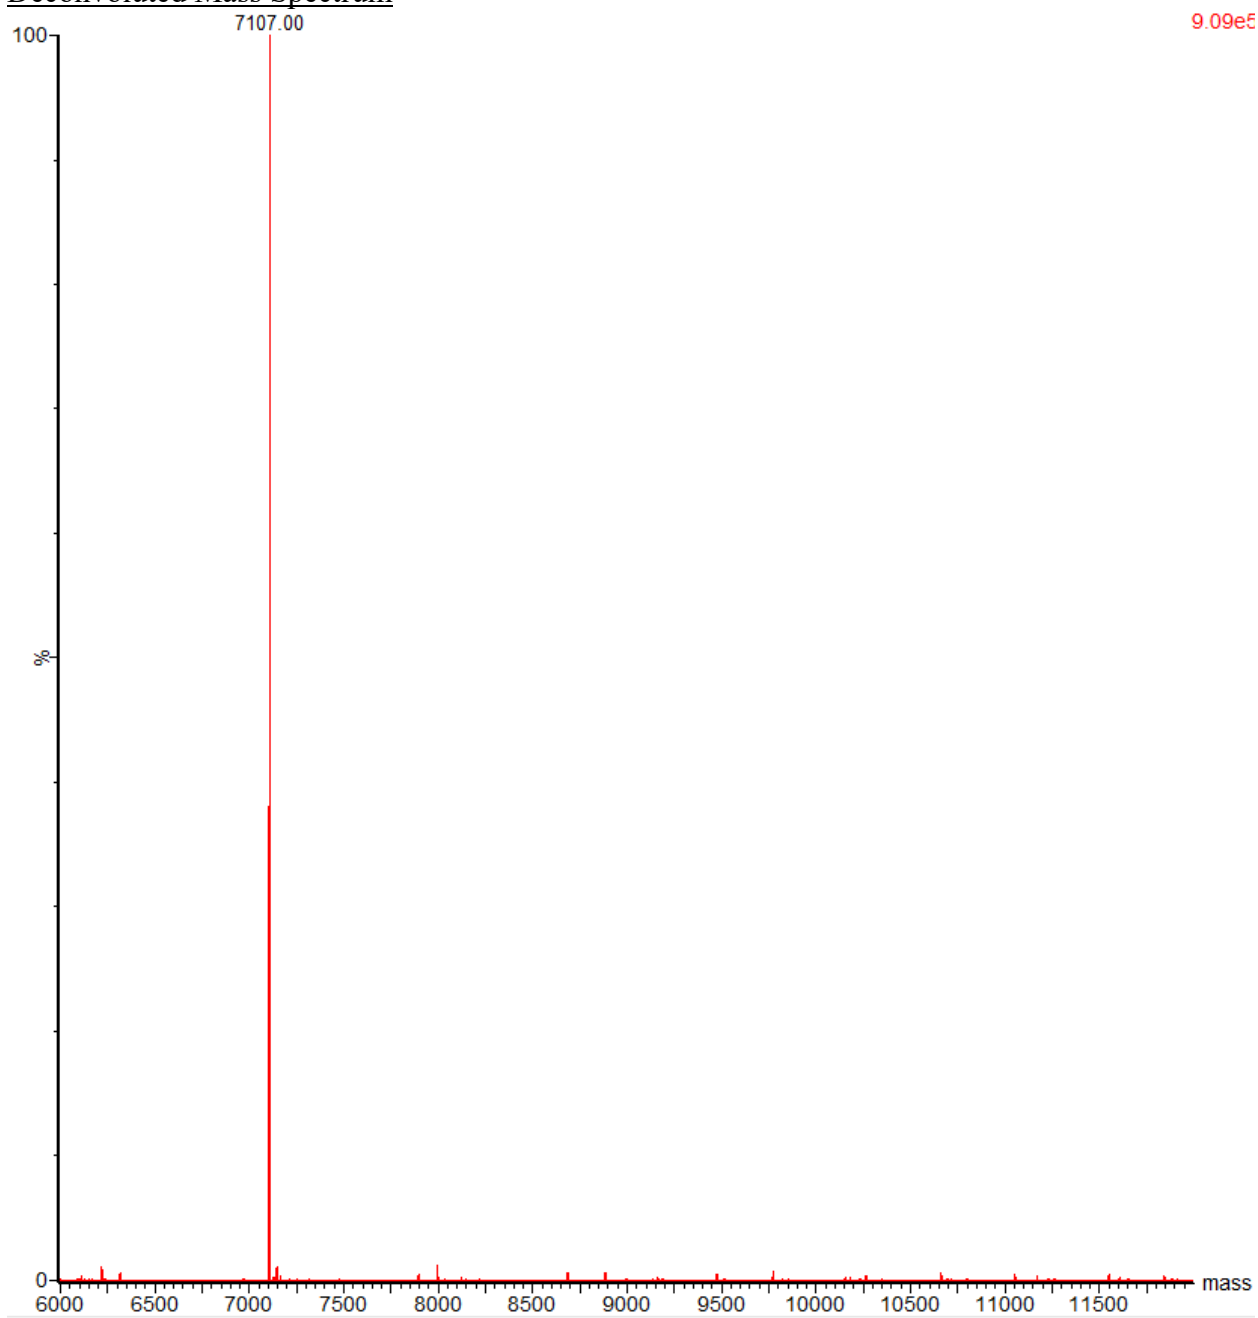

---

LCMS Characterization of 71 After SENDR with  $\Psi$ -17 and Lambda Exo Cleanup:

Produced from **SI-46**:

Using  $\Psi$ -17

Expected Mass: 7451.96

Expected (M-6)/6 Ion: 1240.98

Found Deconvoluted Mass: 7452.00

Found (M-6)/6 Ion: 1240.59

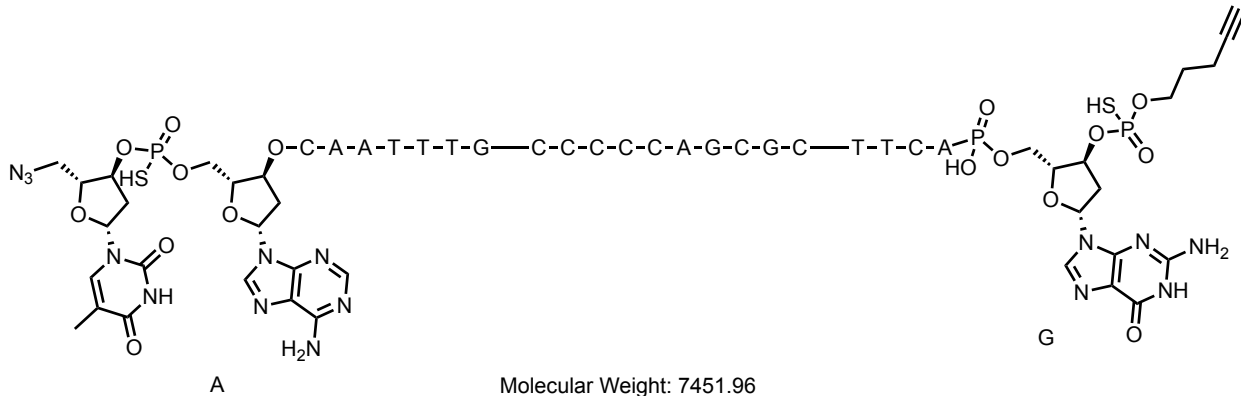

A260 Chromatogram

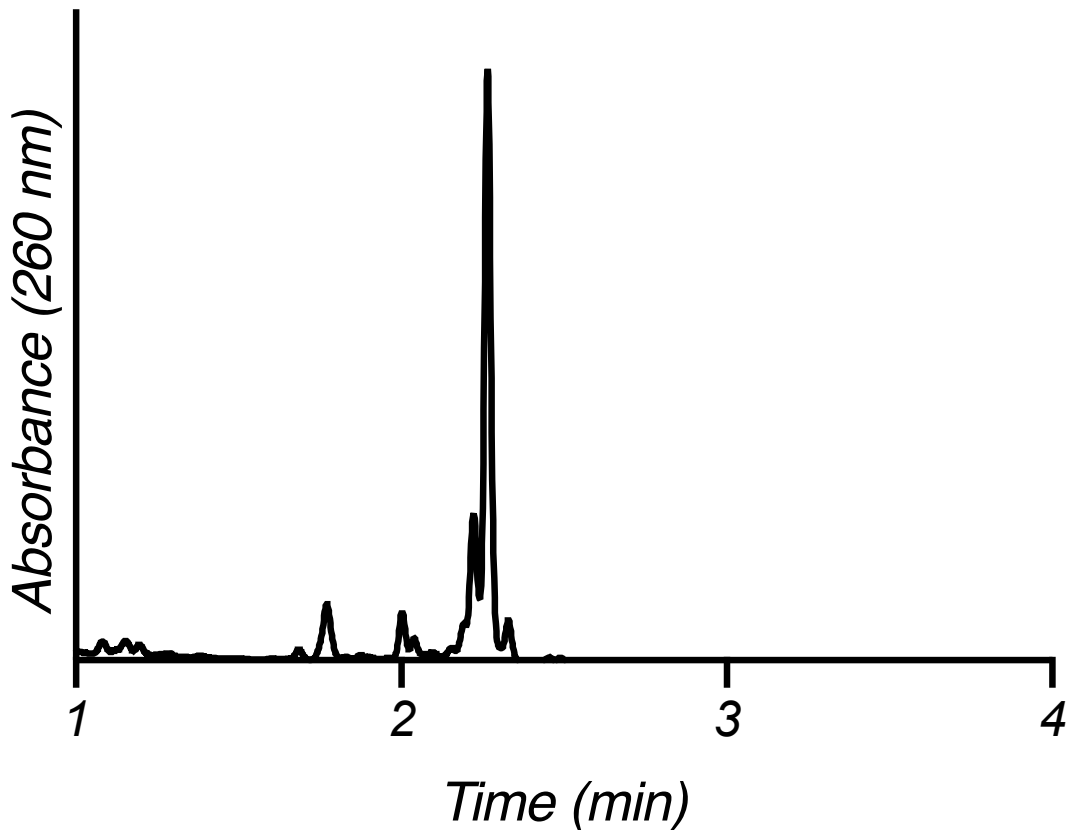

# Mass Spectrum

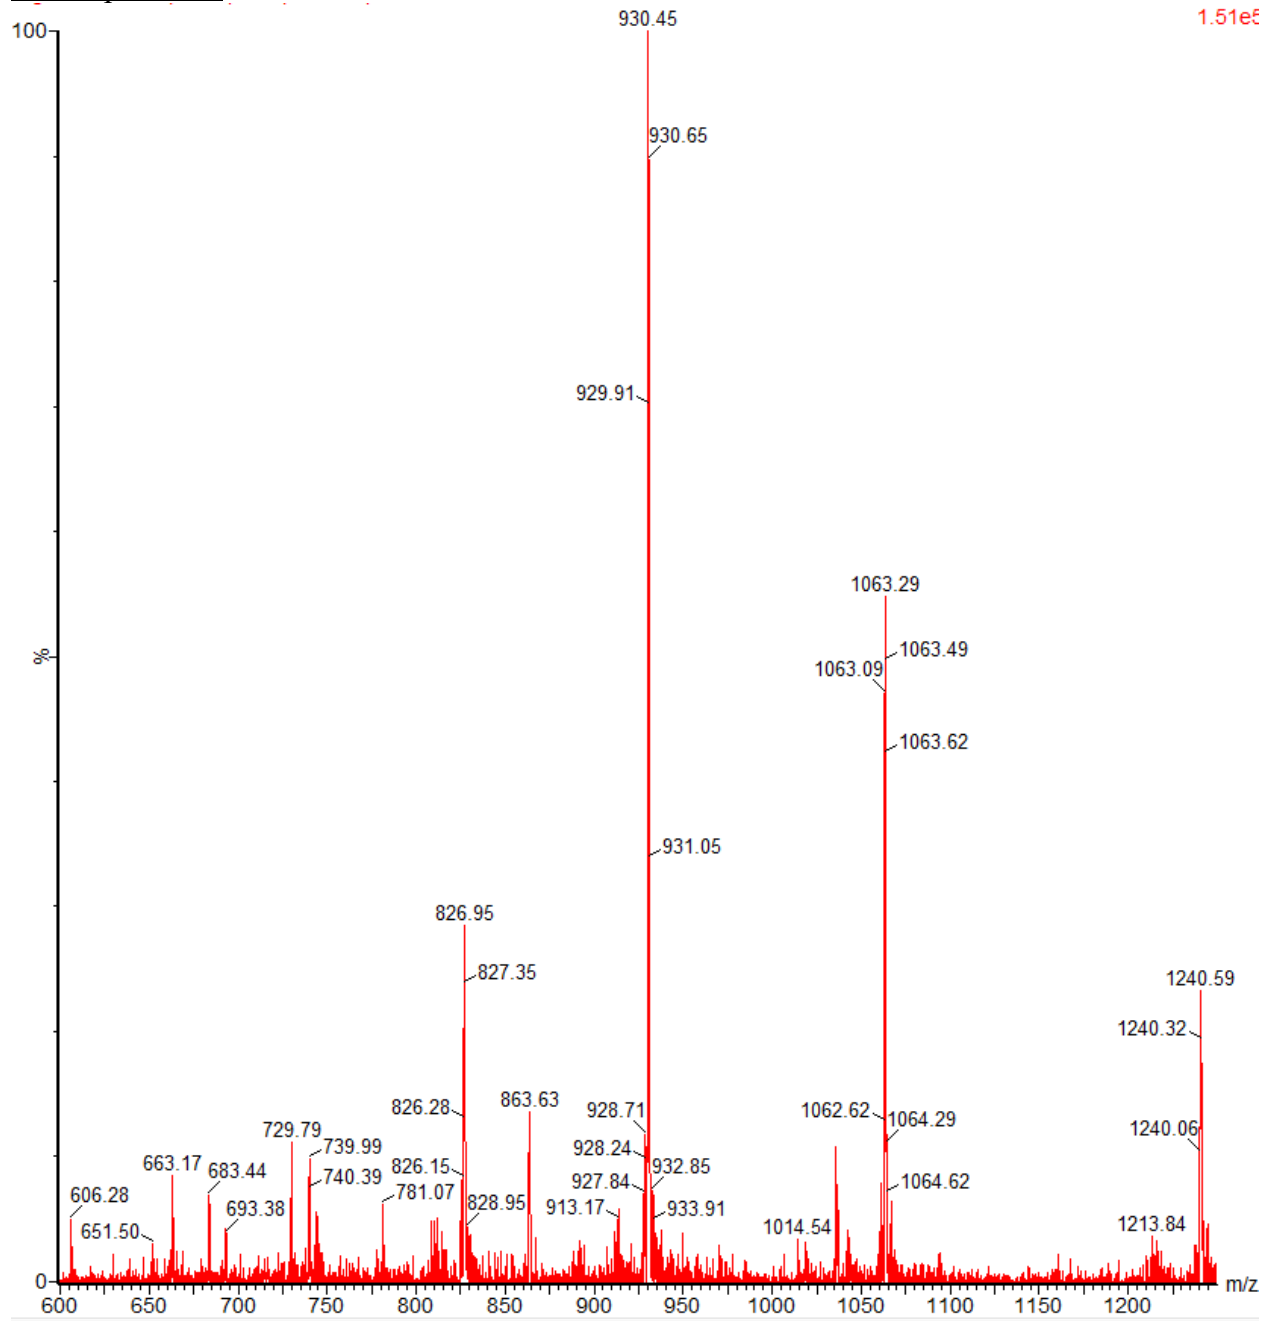

1.51e6

# Deconvoluted Mass Spectrum

1.04eb

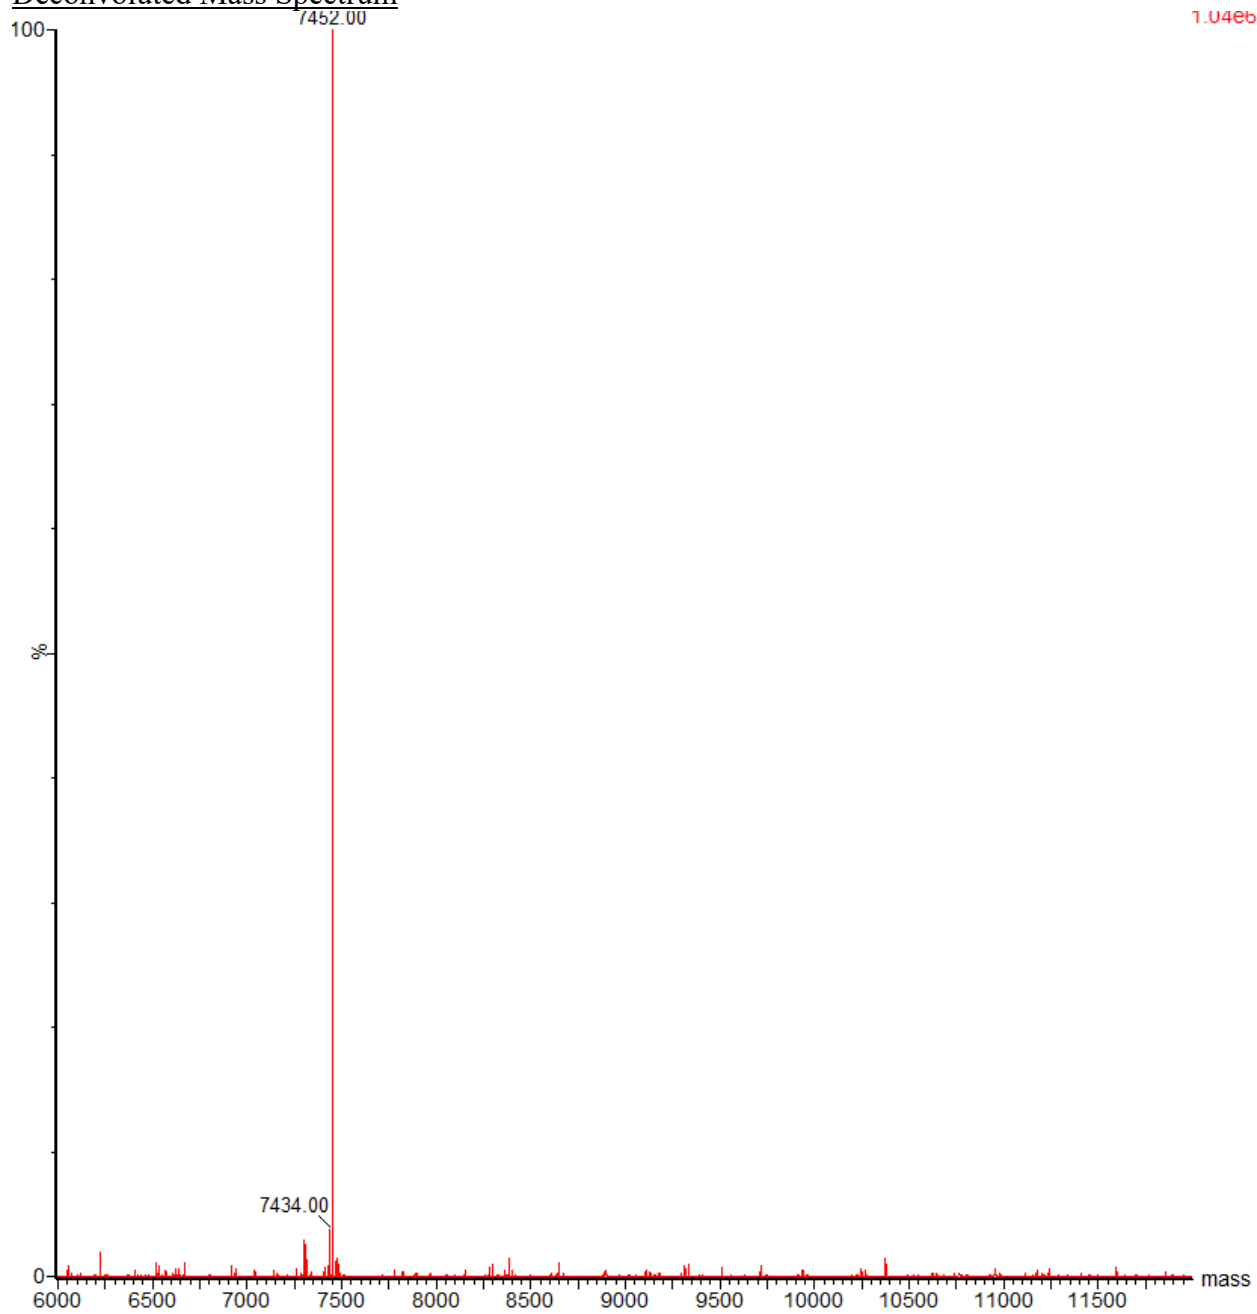



---

### LCMS Characterization of SI-47

Produced from **SI-15** by General Procedure **3**:

Using **Ψ-5**

Expected Mass: 7273.7

Expected (M-6)/6 Ion: 1211.166

Found Deconvoluted Mass: 7274.00

Found (M-6)/6 Ion: 1211.03

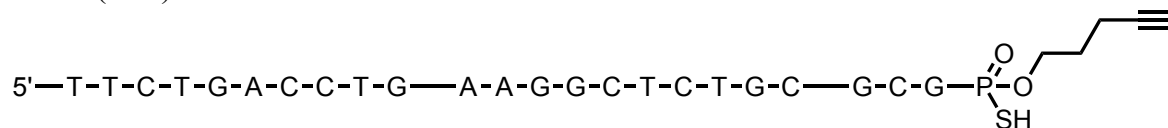

Molecular Weight: 7273.70

### A260 Chromatogram

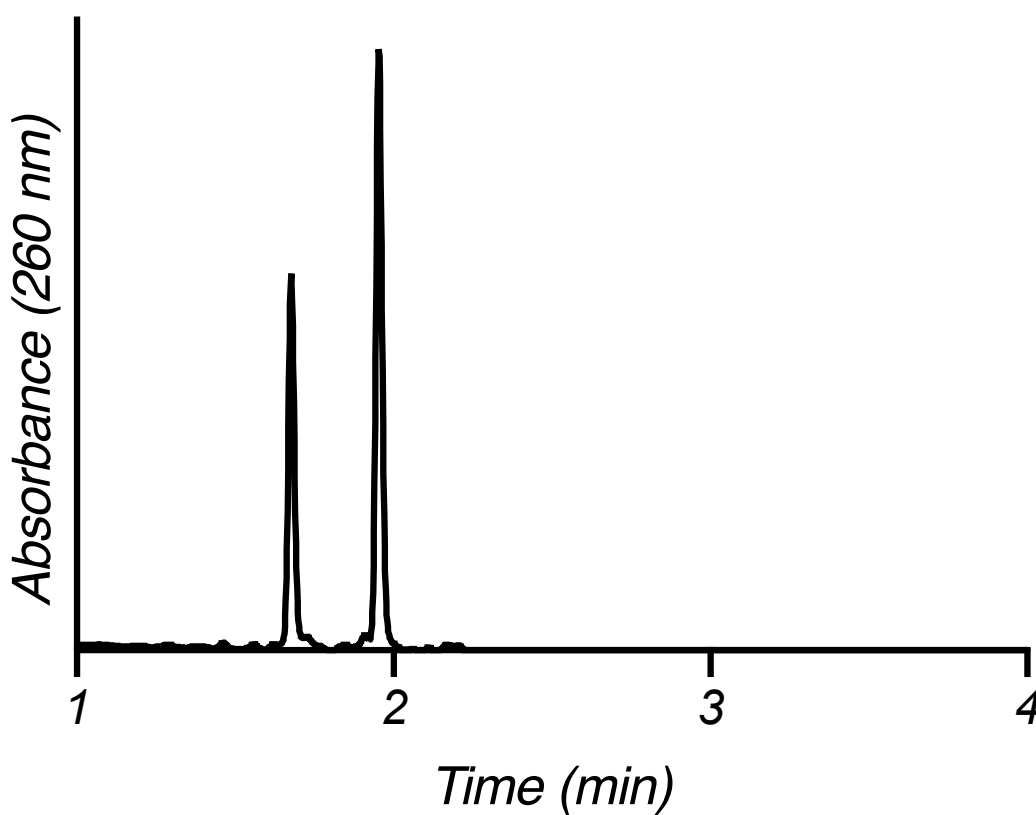

# Mass Spectrum

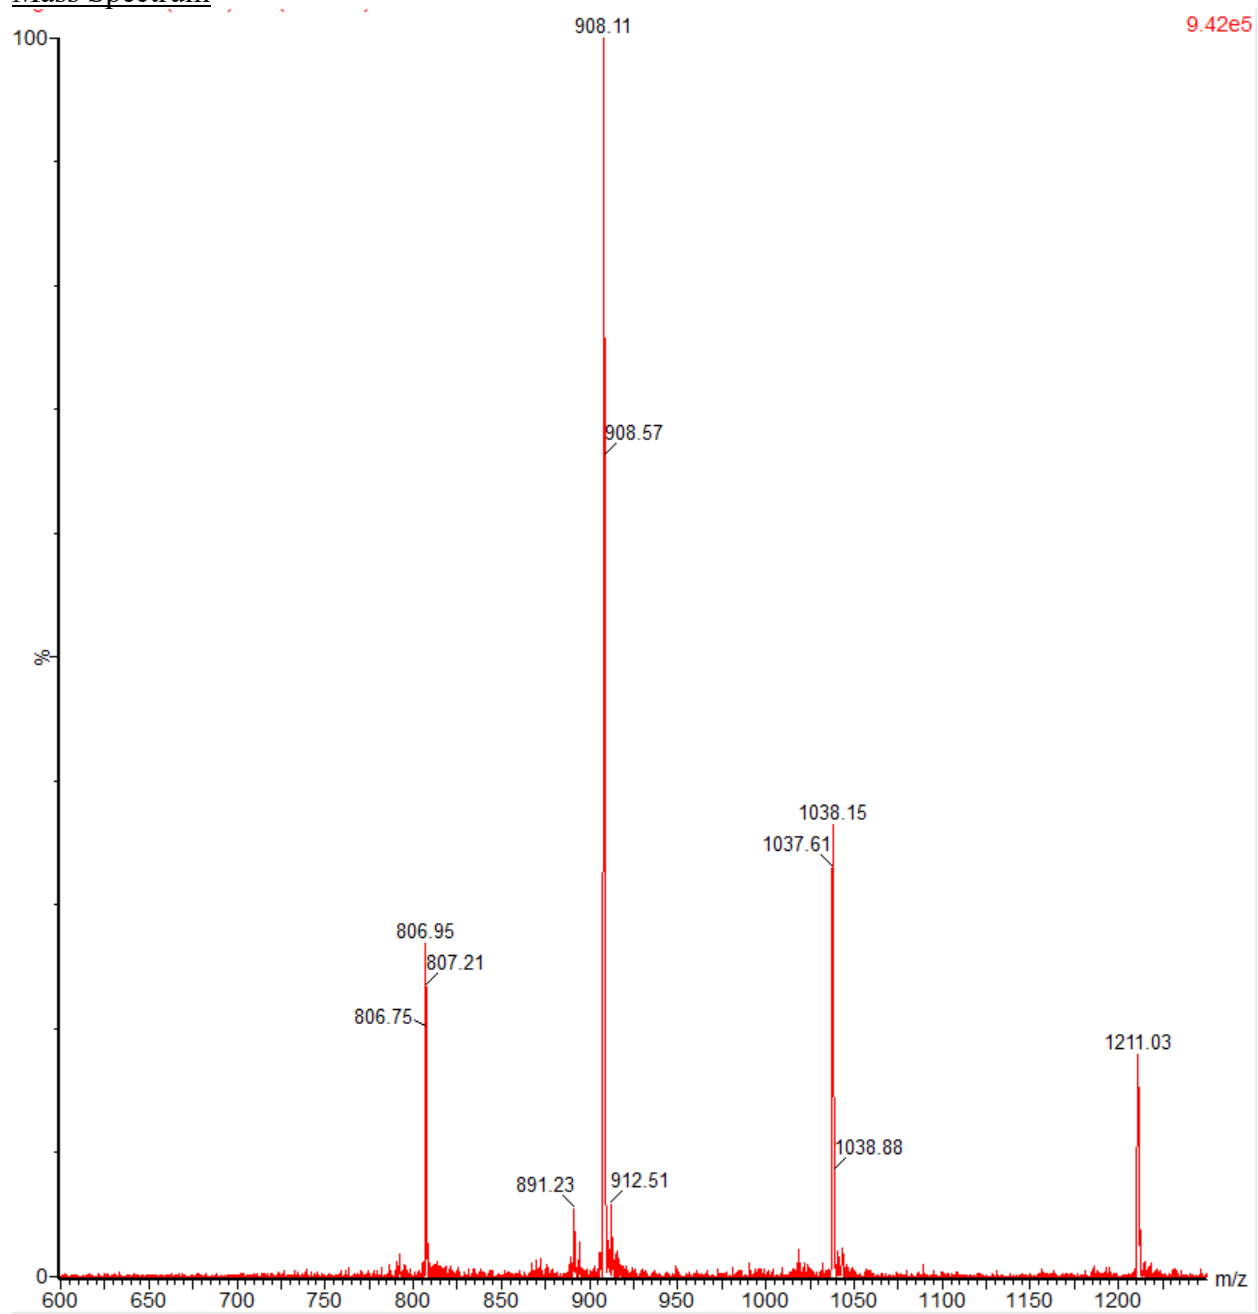

# Deconvoluted Mass Spectrum

2.68e9

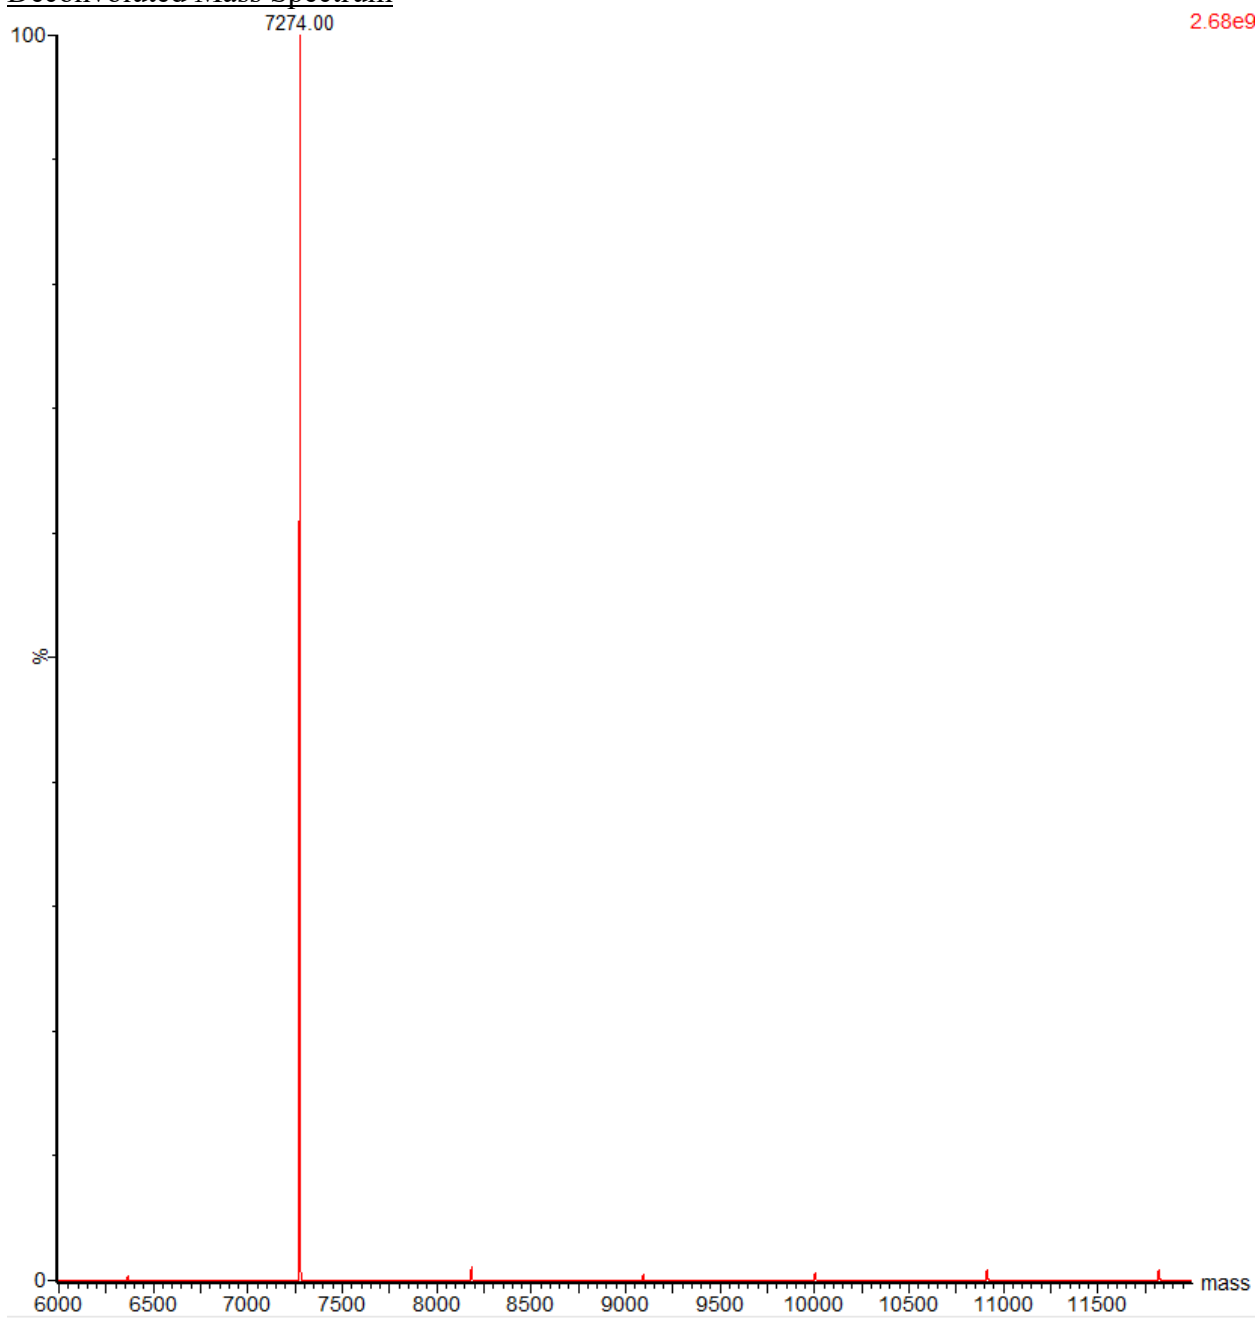

---

### LCMS Characterization of SI-48

Produced from SI-47 by rSAP and EXOIII:

Expected Mass: 7193.72

Expected (M-6)/6 Ion: 1197.95

Found Deconvoluted Mass: 7193.00

Found (M-6)/6Ion: 1197.76

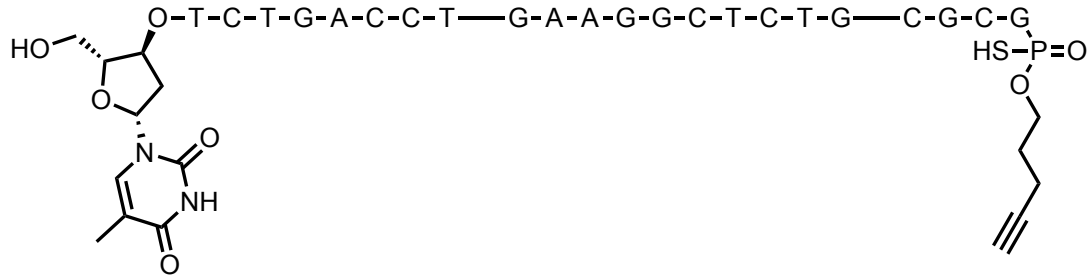

Molecular Weight: 7193.72

### A260 Chromatogram

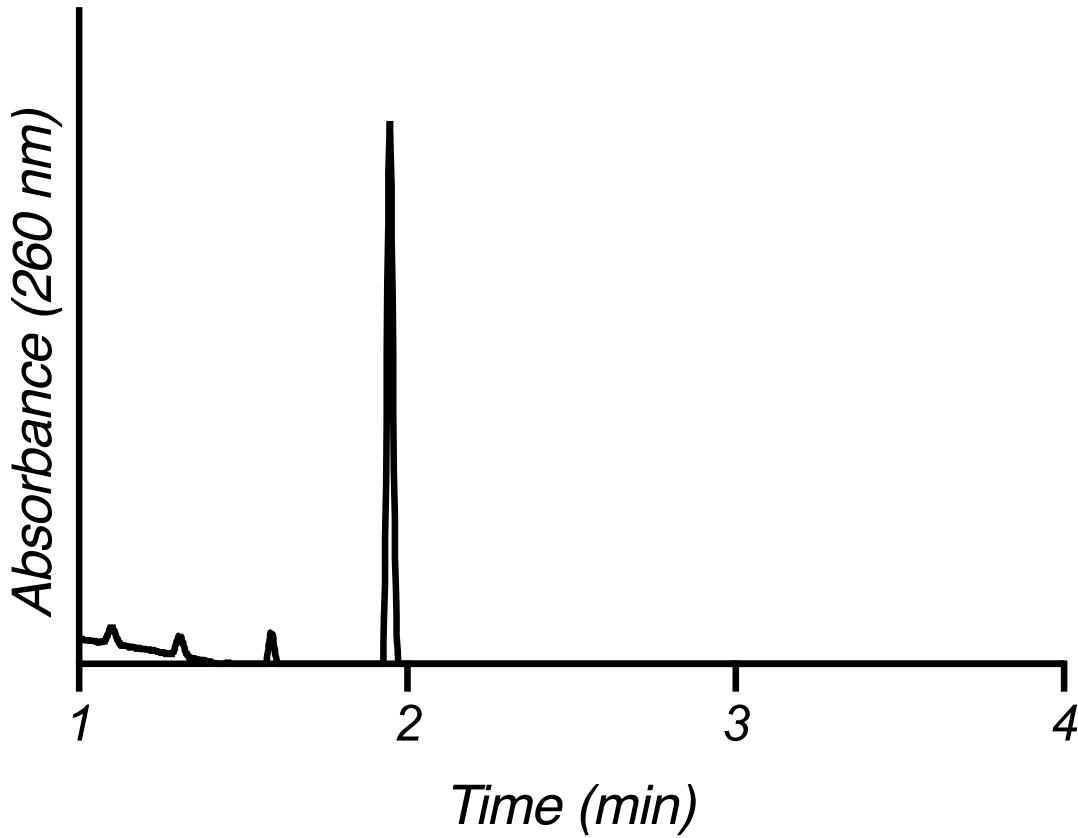

# Mass Spectrum

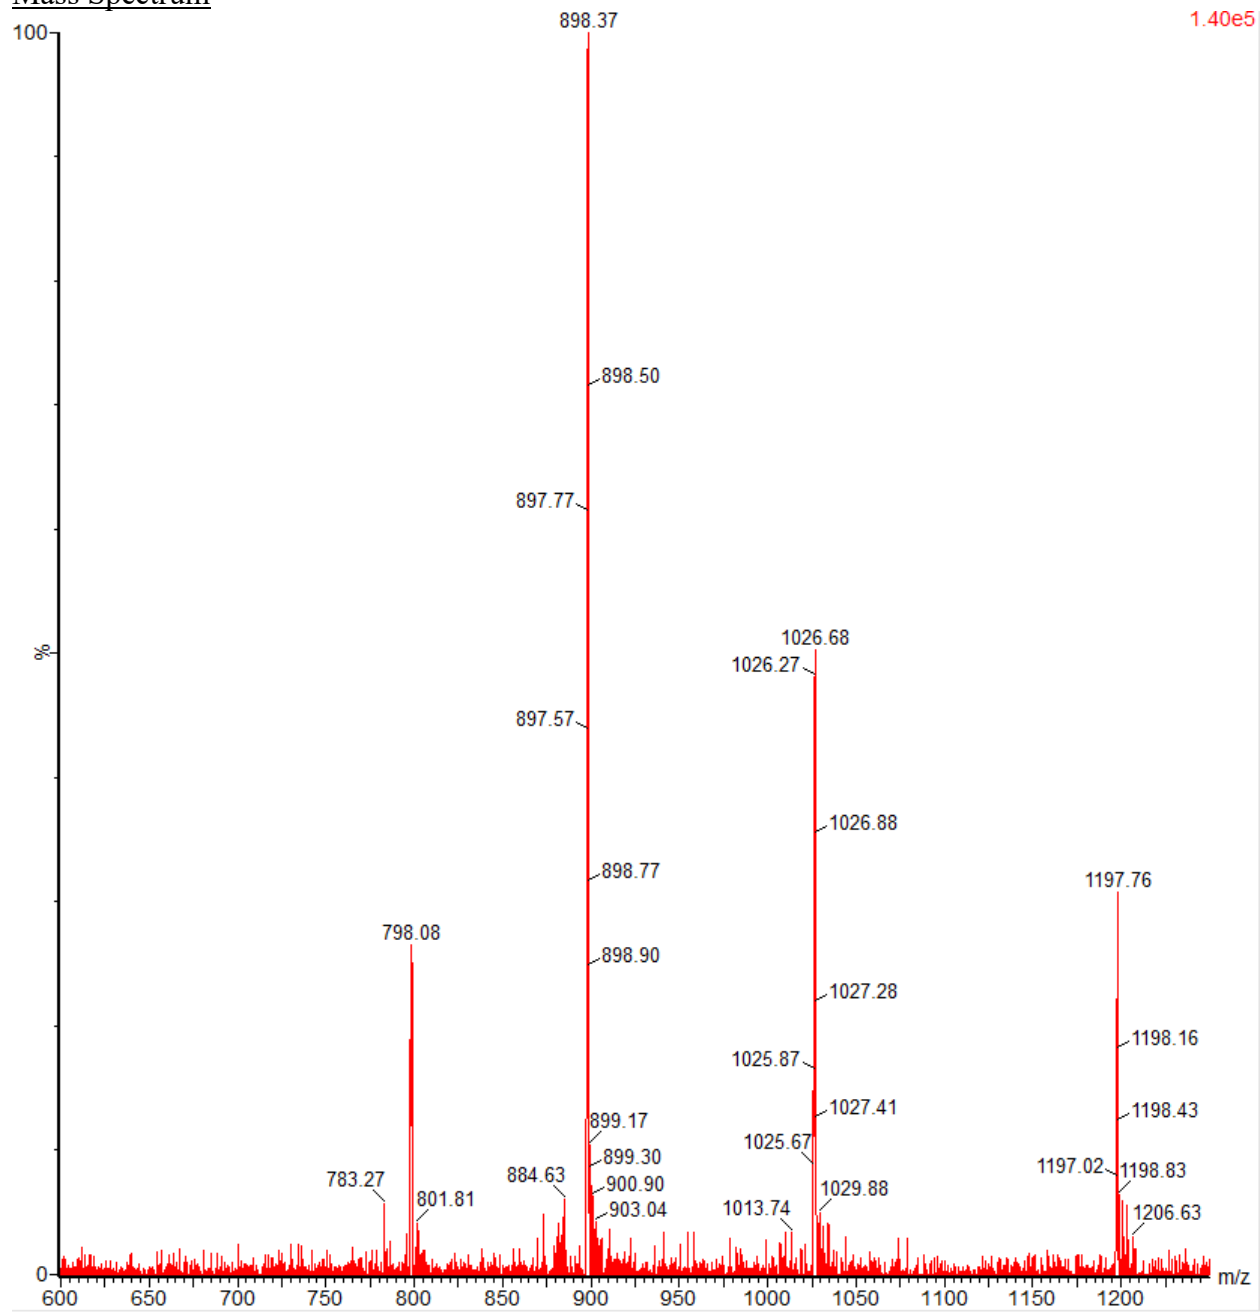

1.40e5

Deconvoluted Mass Spectrum

4.24e5

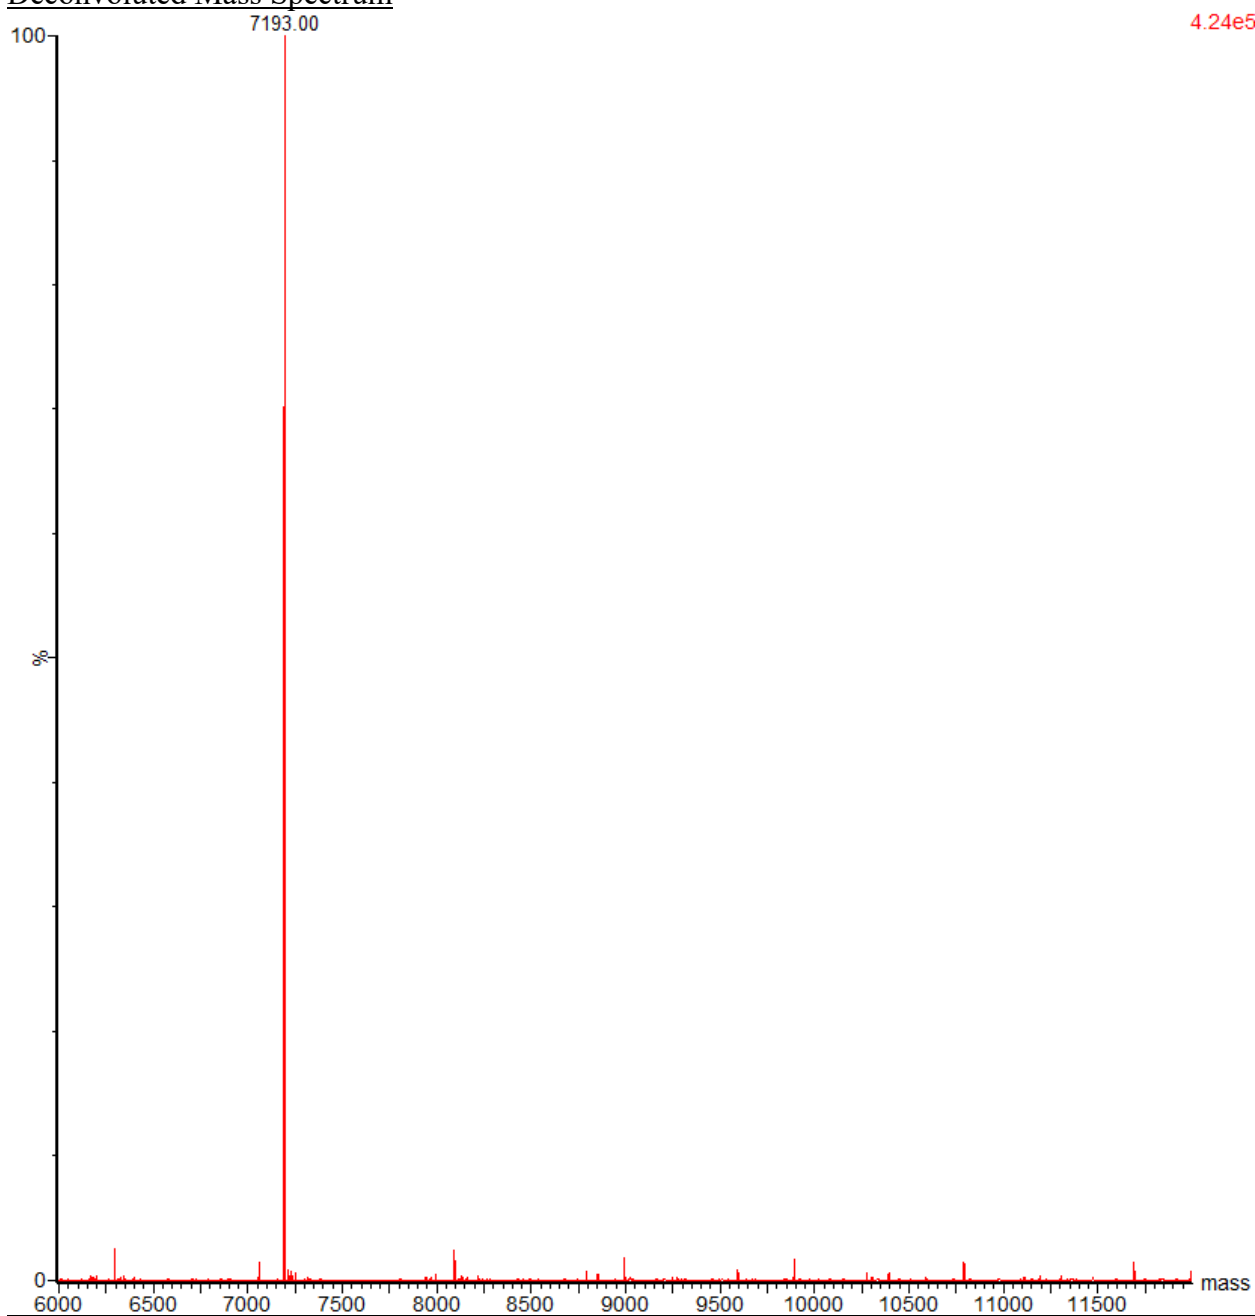

LCMS Characterization of 74 after SENDR with  $\Psi$ -17 and lambda exo cleanup:

Produced from **SI-48**:

Using  $\Psi$ -17

Expected Mass: 7538.99

Expected (M-7)/7 Ion: 1075.5

Found Deconvoluted Mass: 7539.00

Found (M-6)/6 Ion: 1075.6

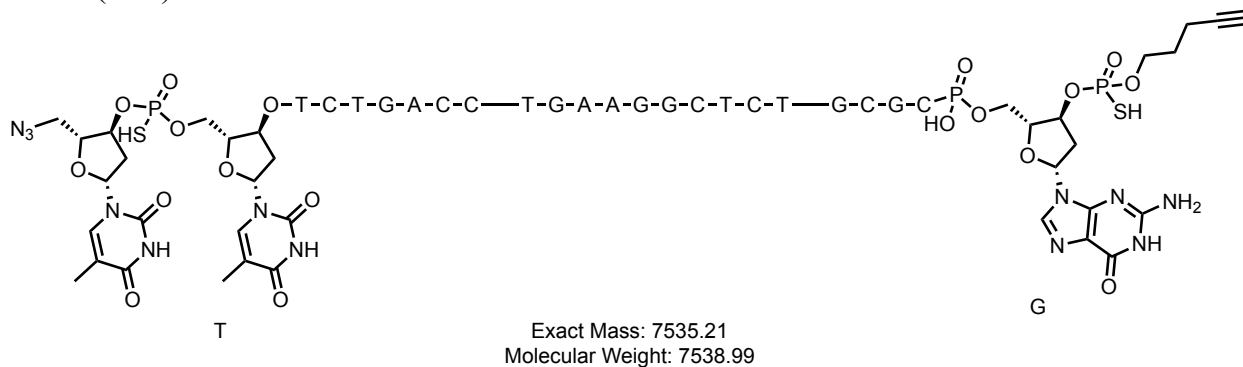

A260 Chromatogram

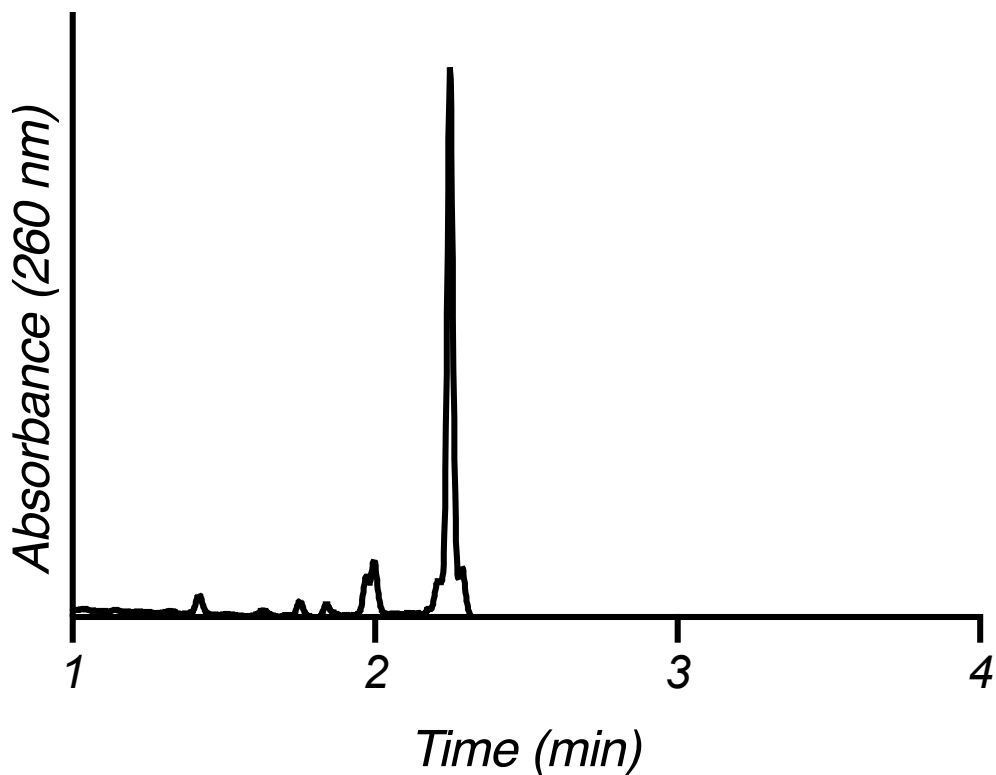

# Mass Spectrum

1.02e5

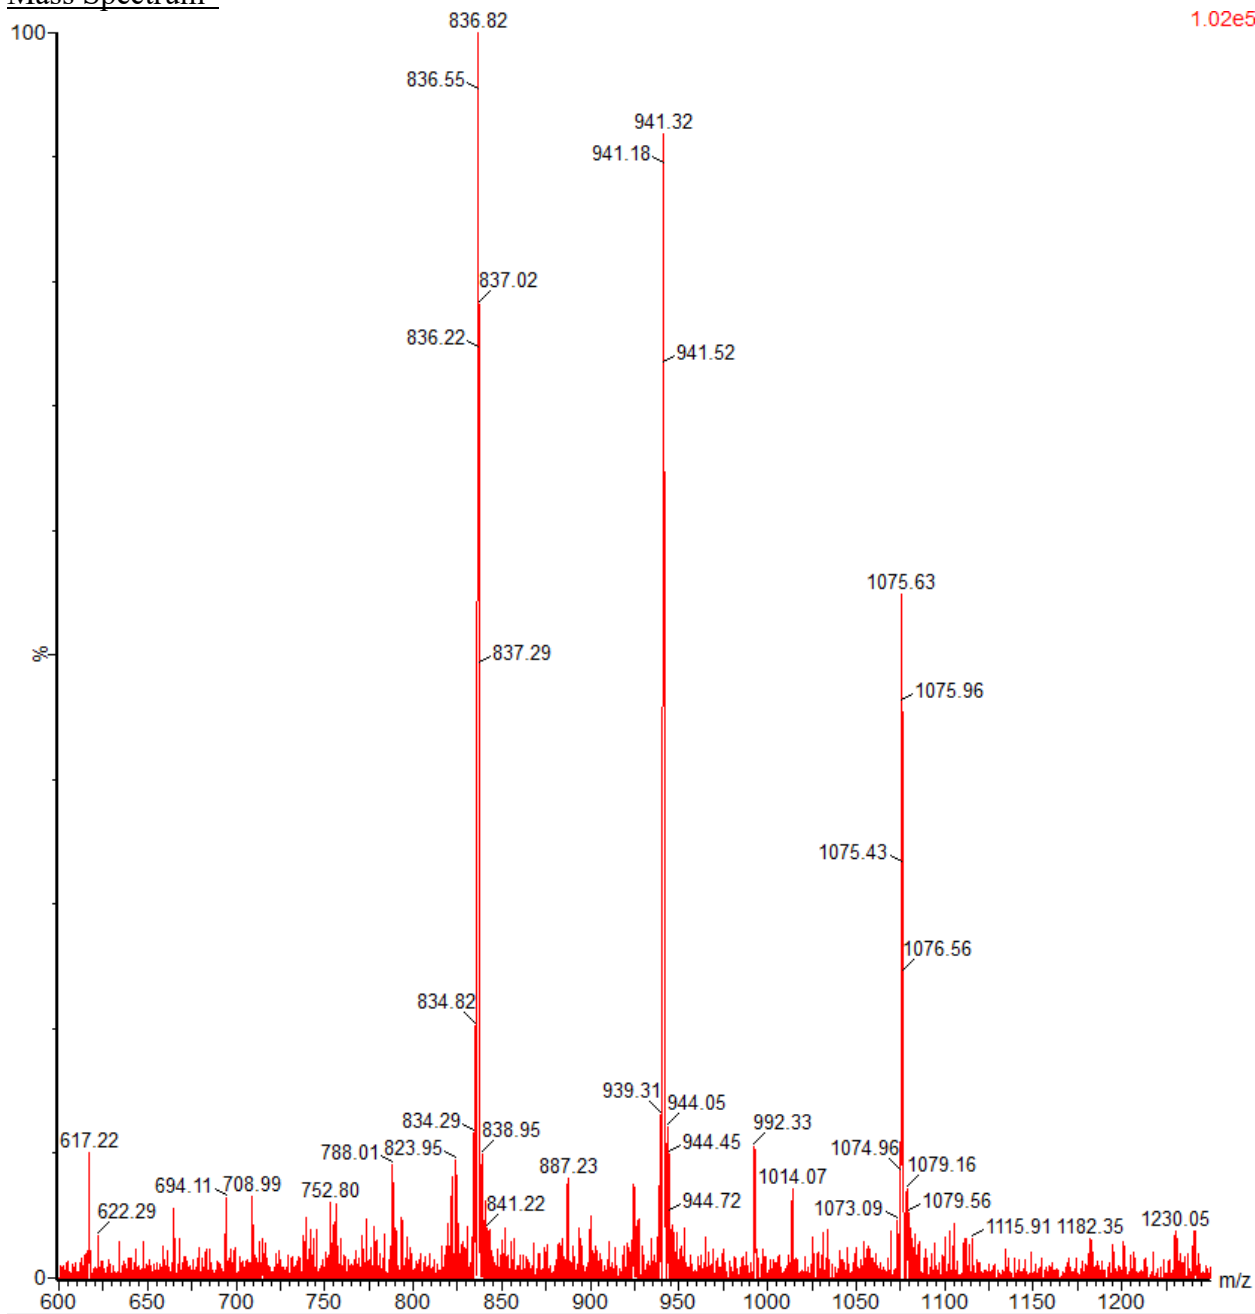



# Deconvoluted Mass Spectrum

4.96e5

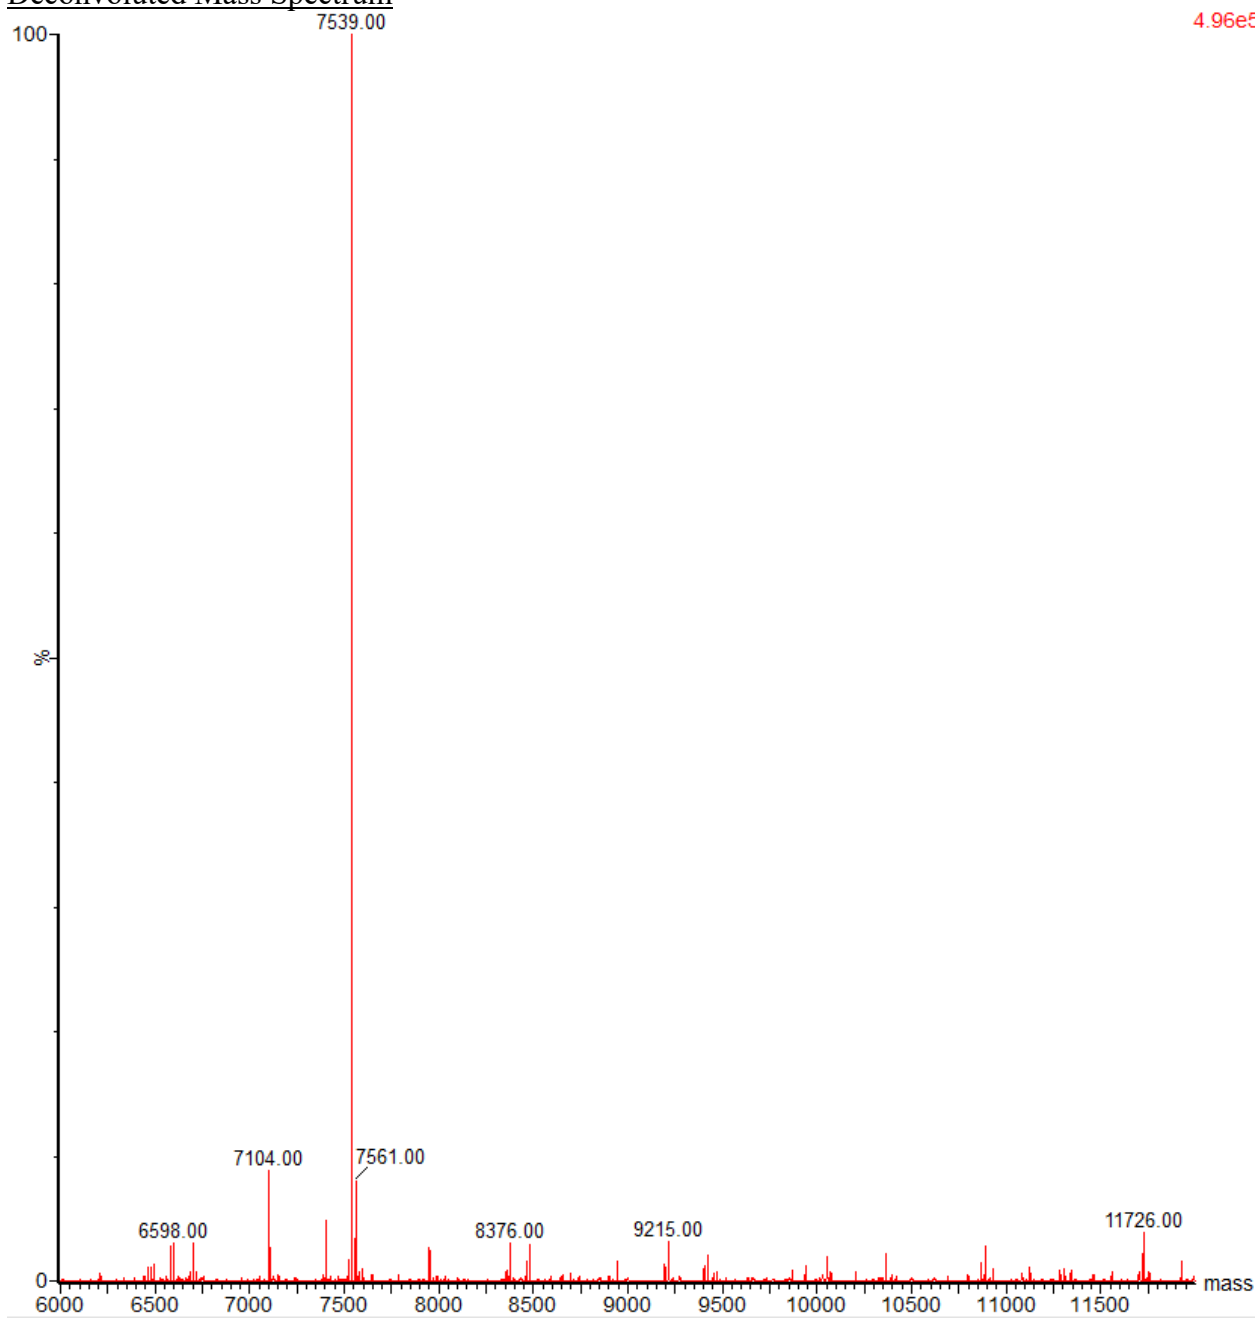

---

## Comparison Between Kit and Microtube Format

### Procedure

DNA **3** was synthesized in cartridges according to *General Procedure 3*. Briefly, the resin (100  $\mu\text{L}$ ) was loaded into a fritted cartridge (Bio-Rad, Bio-Spin column, 1.2 mL, Cat. Num. 7326008). PBS (500  $\mu\text{L}$ ) was added to the resin bed and allowed to flow through with gravity. The column was capped on the bottom and DNA was loaded (5 nmol in 200  $\mu\text{L}$  PBS) onto the resin bed. The column was then capped (on top), vortexed and agitated for 5 minutes. The load buffer was allowed to flow out with gravity. The Resin bed was washed with DMA (500  $\mu\text{L}$  twice) and THF (500  $\mu\text{L}$  three times), and the solvent was allowed to flow through with gravity each time. The top cap was replaced, and the resin was dried for 2 hours under vacuum (placed on a lyophilizer). A new cap was replaced on the bottom and  $\Psi$ -1 was added (300 mM in MeCN, 125  $\mu\text{L}$ ) and then DBU was added (900 mM in MeCN, 125  $\mu\text{L}$ ). The top cap was replaced, the cartridge was vortexed and the column was incubated at 37  $^{\circ}\text{C}$  for 60 minutes. After the reaction the caps were removed, and the reaction mixture was allowed to flow to waste. The reaction was worked up by washing the resin with PBS and 1:1 PBS:MeCN (500  $\mu\text{L}$  each). The cap washed replaced and elute buffer added (300  $\mu\text{L}$ ). The cartridge as vortexed for 30 seconds and agitated for 10 minutes. The cap was removed and the elute buffer was collected. Finally, the DNA was isolated by ethanol precipitation and analyzed by HPLC MS.

---

### LCMS Characterization of 3

Produced from **1** by General Procedure **3**:

Using  $\Psi$ -1

Yield (A260): >95%

Expected Mass: 7023.6

Expected (M-4)/4 Ion: 1169.02

Found Deconvoluted Mass: 7024.00

Found (M-6)/6 Ion: 1169.2

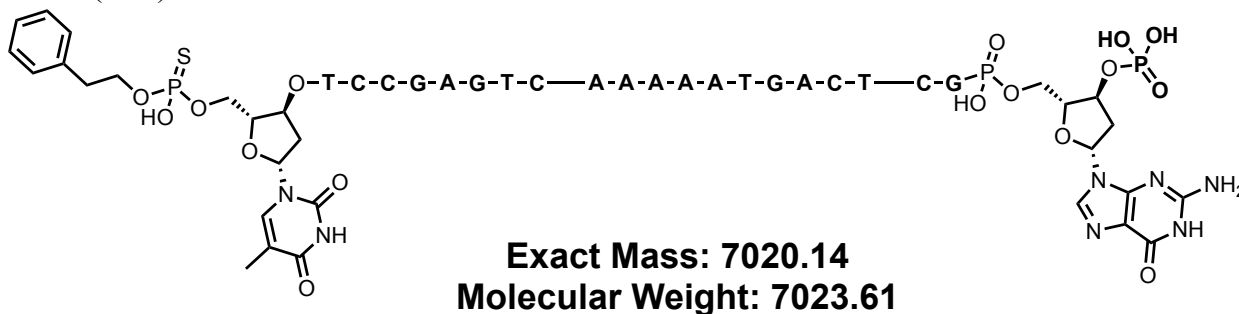

### A260 Chromatogram

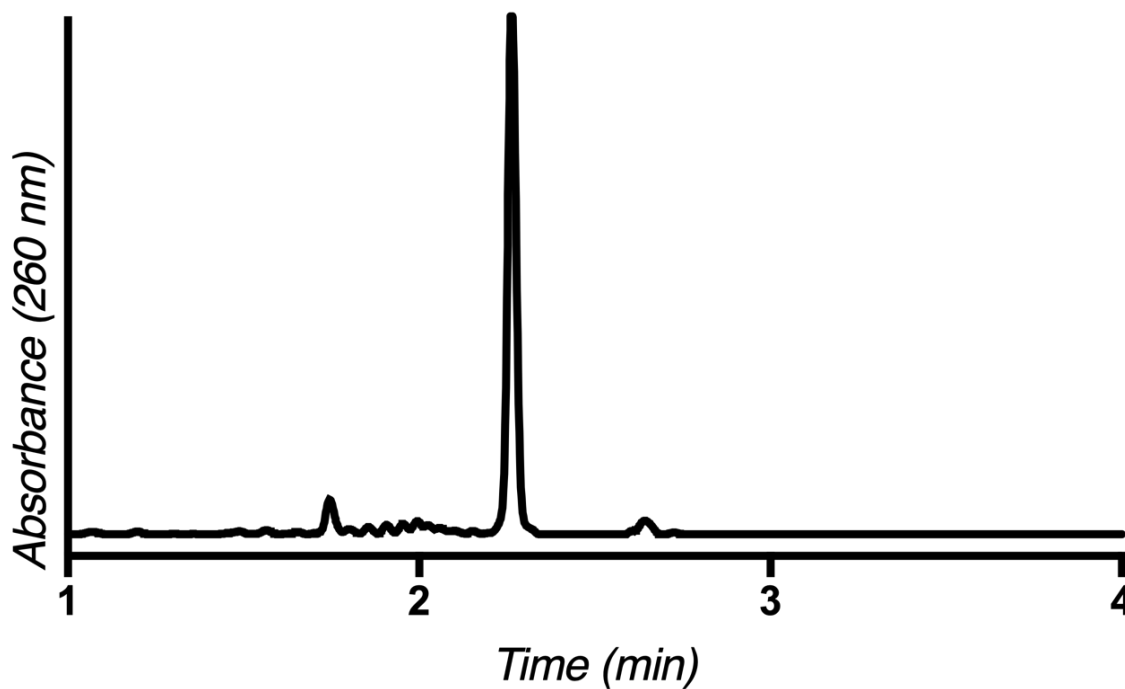

Mass Spectrum (RT= 5.28 min)

3.39e5

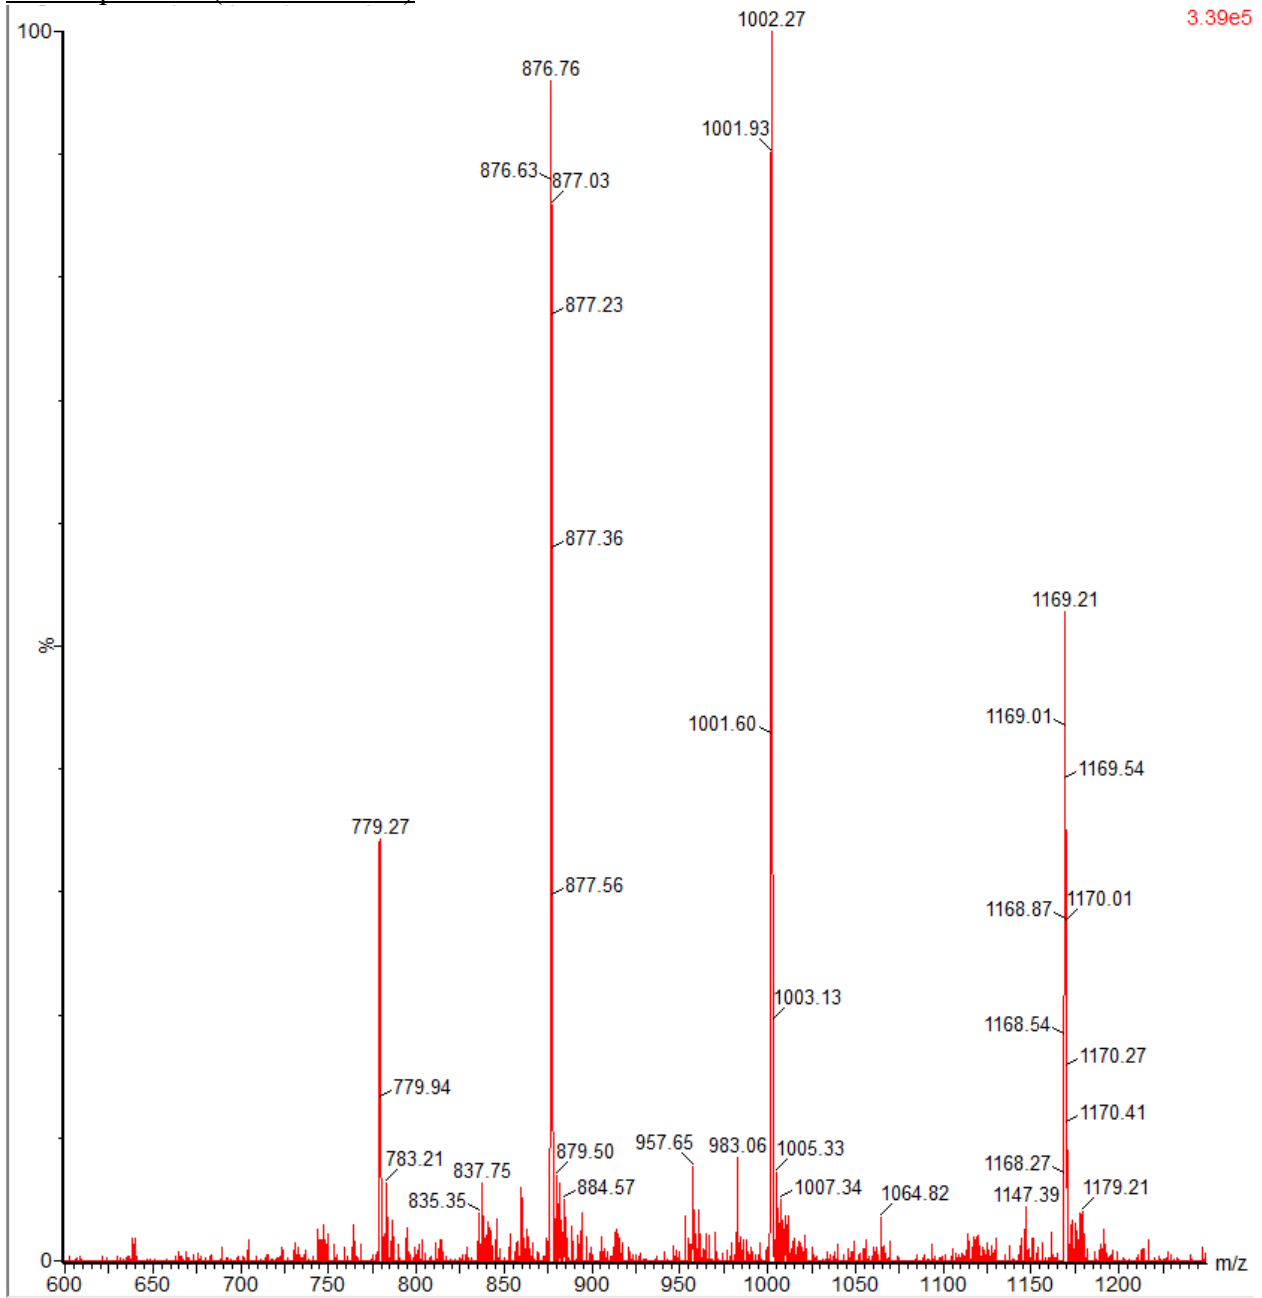

# Deconvoluted Mass Spectrum

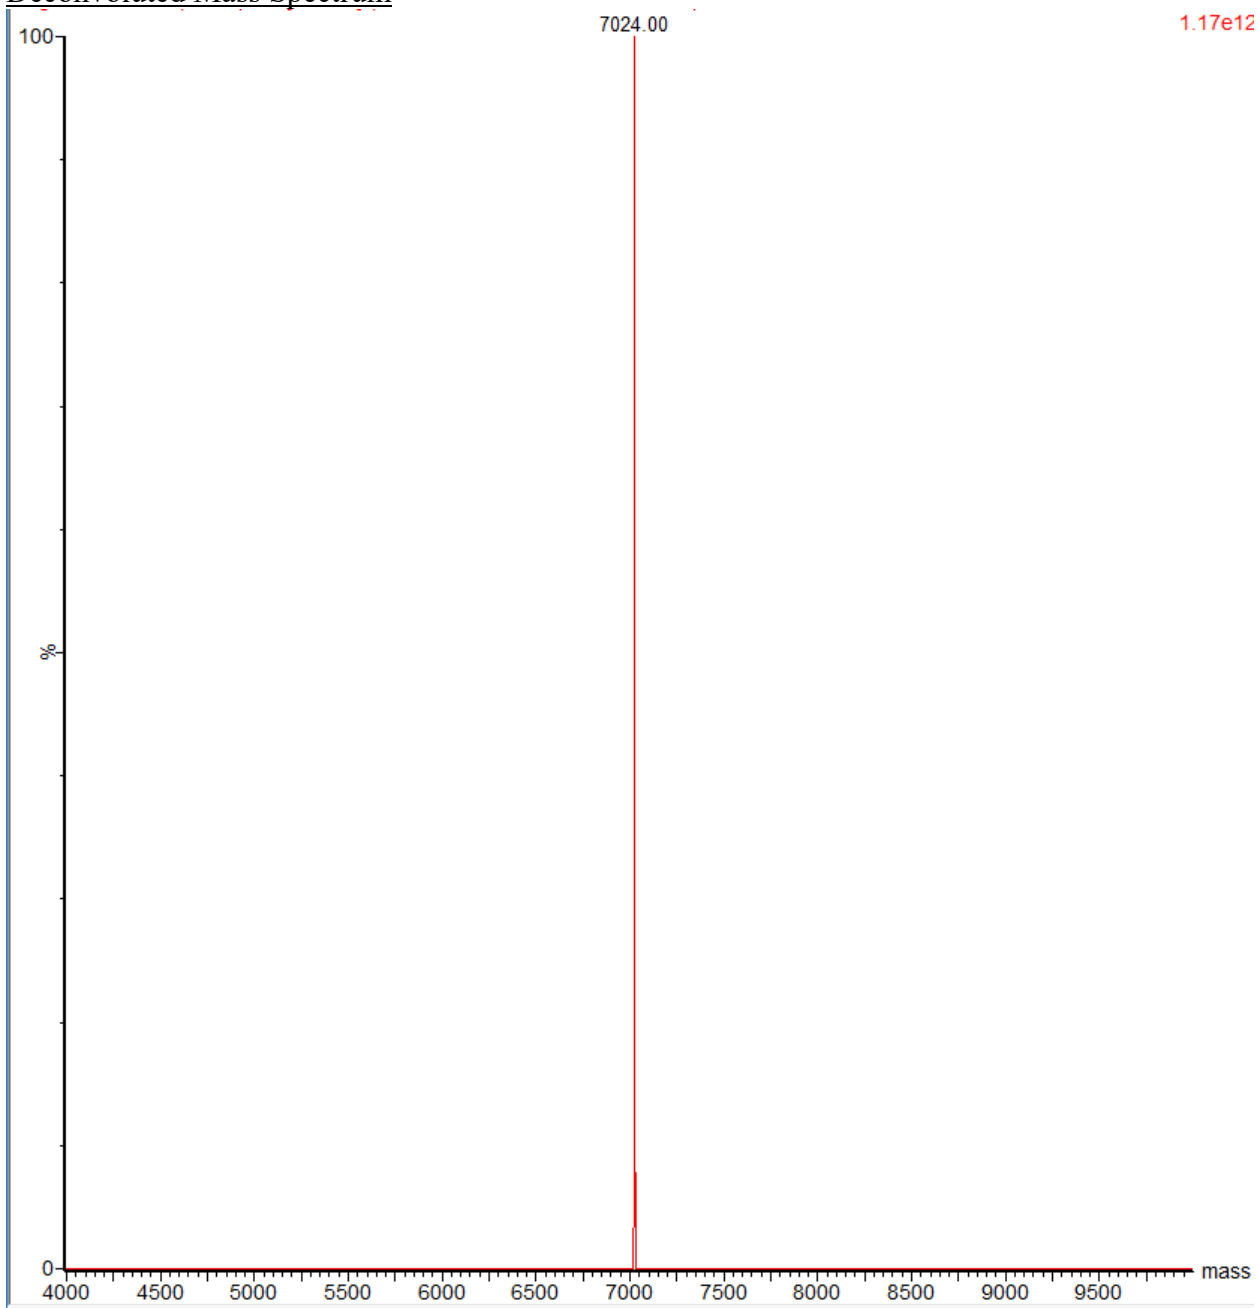

---

## Synthesis of Small Molecule Alcohols for use in Ψ-Module Synthesis

---

### Synthesis of SI-49

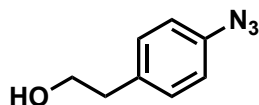

The synthesis of **SI-49** was carried out according to known literature procedures<sup>4</sup>

### Synthesis of SI-50

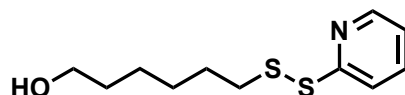

The synthesis of **SI-50** was carried out according to known literature procedures<sup>5</sup>

### Synthesis of SI-51

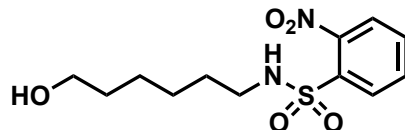

The synthesis of **SI-51** was carried out according to known literature procedures<sup>6</sup>

### Synthesis of SI-52

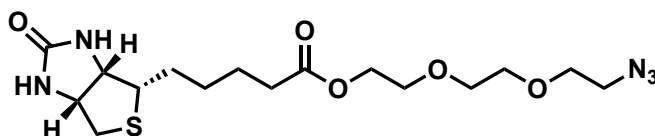

The synthesis of **SI-52** was carried out according to known literature procedures<sup>7</sup>

---

---

### Synthesis of SI-53

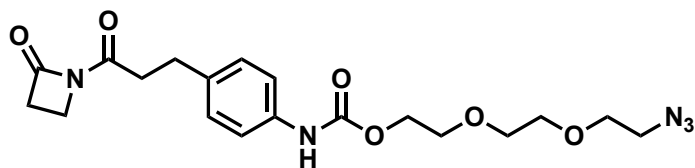

The synthesis of **SI-53** was carried out according to known literature procedures<sup>8-9</sup>

### Synthesis of SI-54

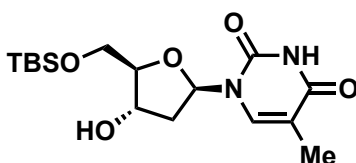

The synthesis of **SI-54** was carried out according to known literature procedures<sup>10</sup>

### Synthesis of SI-55

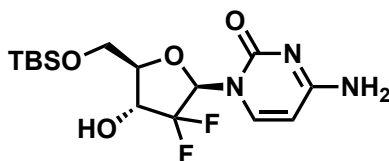

The synthesis of **SI-55** was carried out according to known literature procedures<sup>11</sup>

### Synthesis of SI-56

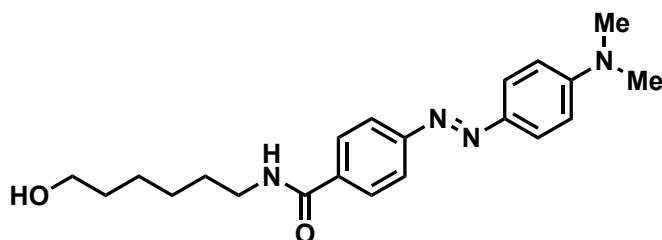

The synthesis of **SI-56** was carried out according to known literature procedures<sup>12</sup>

---

---

### Synthesis of SI-57

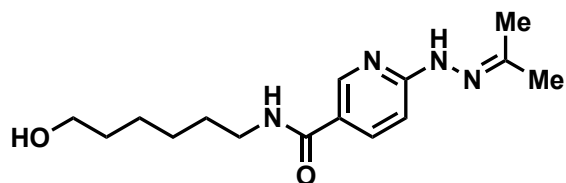

The synthesis of **SI-57** was carried out according to known literature procedures<sup>13</sup>

### Synthesis of SI-58

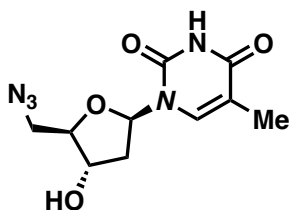

The synthesis of **SI-58** was carried out according to known literature procedures<sup>14</sup>

### Synthesis of SI-59

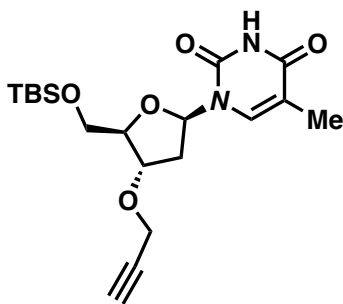

The synthesis of **SI-59** was carried out according to known literature procedures<sup>15</sup>

### Synthesis of SI-60

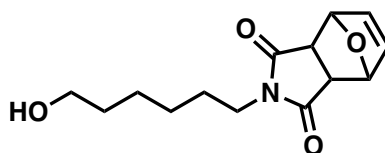

The synthesis of **SI-60** was carried out according to known literature procedures<sup>16</sup>



---

---

### Synthesis of SI-61

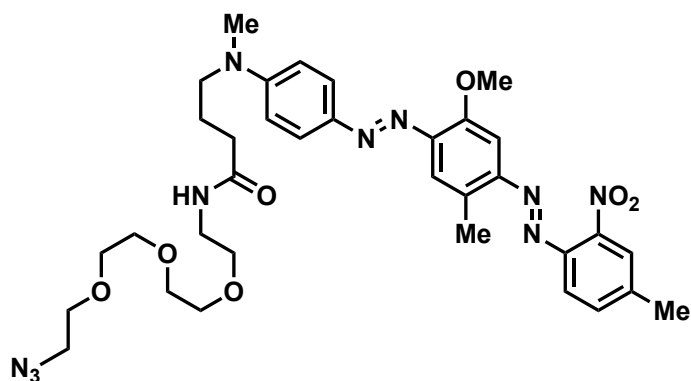

The synthesis of **SI-61** was carried out according to known literature procedures<sup>9</sup>

### Synthesis of SI-62

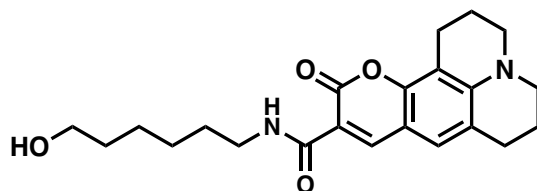

The synthesis of **SI-62** was carried out according to known literature procedures<sup>17</sup>

---

## References

1. Knouse, K. W.; deGruyter, J. N.; Schmidt, M. A.; Zheng, B.; Vantourout, J. C.; Kingston, C.; Mercer, S. E.; McDonald, I. M.; Olson, R. E.; Zhu, Y.; Hang, C.; Zhu, J.; Yuan, C.; Wang, Q.; Park, P.; Eastgate, M. D.; Baran, P. S., Unlocking P(V): Reagents for chiral phosphorothioate synthesis. *Science* **2018**, *361* (6408), 1234-1238.
2. Zheng, Q.; Woehl, J. L.; Kitamura, S.; Santos-Martins, D.; Smedley, C. J.; Li, G.; Forli, S.; Moses, J. E.; Wolan, D. W.; Sharpless, K. B., SuFEx-enabled, agnostic discovery of covalent inhibitors of human neutrophil elastase. *Proc Natl Acad Sci U S A* **2019**, *116* (38), 18808-18814.
3. Nanna, A. R.; Rader, C., Engineering Dual Variable Domains for the Generation of Site-Specific Antibody-Drug Conjugates. *Methods Mol Biol* **2019**, *2033*, 39-52.
4. Bressy, C.; Belkheira, M.; El Abed, D.; Pons, J.-M., Chemoselective Organoclick-Click Sequence. *Synthesis* **2018**, *50* (21), 4254-4262.
5. Filippov, D.; van der Marel, G.; van Delft, P.; van Schie, E.; Meeuwenoord, N.; Overkleeft, H., Oligonucleotide Conjugates by Means of Copper-Free Click Chemistry - Expanding the Repertoire of Strained Cyclooctyne Phosphoramidites. *Synthesis* **2011**, *2011* (17), 2724-2732.
6. Miki, K.; Kimura, A.; Oride, K.; Kuramochi, Y.; Matsuoka, H.; Harada, H.; Hiraoka, M.; Ohe, K., High-contrast fluorescence imaging of tumors in vivo using nanoparticles of amphiphilic brush-like copolymers produced by ROMP. *Angew Chem Int Ed Engl* **2011**, *50* (29), 6567-70.
7. Ramos-Soriano, J.; Reina, J. J.; Perez-Sanchez, A.; Illescas, B. M.; Rojo, J.; Martin, N., Cyclooctyne [60]fullerene hexakis adducts: a globular scaffold for copper-free click chemistry. *Chem Commun (Camb)* **2016**, *52* (69), 10544-6.
8. Palanki, M. S.; Bhat, A.; Bolanos, B.; Brunel, F.; Del Rosario, J.; Dettling, D.; Horn, M.; Lappe, R.; Preston, R.; Sievers, A.; Stankovic, N.; Woodnut, G.; Chen, G., Development of a long acting human growth hormone analog suitable for once a week dosing. *Bioorg Med Chem Lett* **2013**, *23* (2), 402-6.
9. Ghosh, A. K.; Doung, T. T.; McKee, S. P.; Thompson, W. J., N,N'-dissuccinimidyl carbonate: a useful reagent for alkoxycarbonylation of amines. *Tetrahedron Letters* **1992**, *33* (20), 2781-2784.
10. Beigelman, L.; Serebryany, V.; Karpeisky, A.; Matulic-Adamic, J., Synthesis of 1,4-Anhydro-2-deoxy-d-ribitol Derivatives from Thymidine Using Improved Preparation of Furanoid Glycals. *Synthesis* **2002**, *2002* (12), 1652-1654.
11. Labroli, M. A.; Dwyer, M. P.; Shen, R.; Popovici-Muller, J.; Pu, Q.; Wyss, D.; McCoy, M.; Barrett, D.; Davis, N.; Seghezzi, W.; Shanahan, F.; Taricani, L.; Beaumont, M.; Malinao, M. C.; Parry, D.; Guzi, T. J., The identification of novel 5'-amino gemcitabine analogs as potent RRM1 inhibitors. *Bioorg Med Chem* **2014**, *22* (7), 2303-10.
12. Katritzky, A. R.; Chen, Q. Y.; Tala, S. R., Convenient preparations of azo-dye labeled amino acids and amines. *Org Biomol Chem* **2008**, *6* (13), 2400-4.
13. Grotzky, A.; Nauser, T.; Erdogan, H.; Schluter, A. D.; Walde, P., A fluorescently labeled dendronized polymer-enzyme conjugate carrying multiple copies of two different types of active enzymes. *J Am Chem Soc* **2012**, *134* (28), 11392-5.

- 
14. Skakuj, K.; Bujold, K. E.; Mirkin, C. A., Mercury-Free Automated Synthesis of Guanidinium Backbone Oligonucleotides. *J Am Chem Soc* **2019**, *141* (51), 20171-20176.
  15. Lolk, L.; Pohlsgaard, J.; Jepsen, A. S.; Hansen, L. H.; Nielsen, H.; Steffansen, S. I.; Sparving, L.; Nielsen, A. B.; Vester, B.; Nielsen, P., A click chemistry approach to pleuromutilin conjugates with nucleosides or acyclic nucleoside derivatives and their binding to the bacterial ribosome. *J Med Chem* **2008**, *51* (16), 4957-67.
  16. Fuhrmann, A.; Broi, K.; Hecht, S., Lowering the Healing Temperature of Photoswitchable Dynamic Covalent Polymer Networks. *Macromol Rapid Commun* **2018**, *39* (1).
  17. Songbai Liu, Wu-Hong Wang, Ya-Li Dang, Yuanqing Fu, Ruocheng Sang., Rational design and efficient synthesis of a fluorescent-labeled jasmonate, *Tetrahedron Letters* **2012**, *53* (32), 4235-4239.
